# Supplementary material for: ZAT10 regulates root thermomorphogenesis via very-long-chain fatty acids signaling
Source: Research Square preprint supplement (doi:10.21203/rs.3.rs-7128687/v1), 2025-07-23
Supplement: Supplementary file 1 [file 0b7cc4c235295442bbdd143f.xlsx]

## Sheet: 250617_Dataset_S2_ZAT10_dap
Dataset S2. List of genes bound by ZAT10 within 1,000 bp upstream of the translation start site.
seqnames	start	end	width	strand	score	signalValue	pValue	qValue	peak	feature	start_position	end_position	feature_strand	insideFeature	distancetoFeature	shortestDistance	fromOverlappingOrNearest
chr1	8943	9144	202	*	162	152	0	74.1	X1.9043	AT1G01020	5928	8737	-	upstream	-206	206	Upstream
chr1	88110	88311	202	*	124	59	0	10.43	X1.88210	AT1G01200	86515	88213	-	overlapStart	103	98	Upstream
chr1	173400	173601	202	*	129	71	0	16.44	X1.173500	AT1G01470	172146	172948	-	upstream	-452	452	Upstream
chr1	302582	302783	202	*	116	39	0	3.11	X1.302682	AT1G01830	298535	302315	-	upstream	-267	267	Upstream
chr1	324690	324891	202	*	141	99.7	0	33.95	X1.324790	AT1G01950	325379	330619	+	upstream	-689	488	Upstream
chr1	347292	347493	202	*	124	59	0	10.43	X1.347392	AT1G02010	347891	352480	+	upstream	-599	398	Upstream
chr1	404797	404998	202	*	130	74	0	18.04	X1.404897	AT1G02140	403190	404456	-	upstream	-341	341	Upstream
chr1	411400	411601	202	*	118	44	0	4.6	X1.411500	AT1G02170	411779	413554	+	upstream	-379	178	Upstream
chr1	474248	474449	202	*	121	52	0	7.48	X1.474348	AT1G02370	474500	476511	+	upstream	-252	51	Upstream
chr1	507450	507651	202	*	116	38.8	0	3.11	X1.507550	AT1G02460	504673	507204	-	upstream	-246	246	Upstream
chr1	602376	602577	202	*	119	46	0	5.27	X1.602476	AT1G02740	599416	602038	-	upstream	-338	338	Upstream
chr1	601703	601904	202	*	120	50	0	6.71	X1.601803	AT1G02750	602497	604292	+	upstream	-794	593	Upstream
chr1	630156	630357	202	*	131	76.4	0	19.7	X1.630256	AT1G02850	630505	633259	+	upstream	-349	148	Upstream
chr1	658819	659020	202	*	118	44	0	4.6	X1.658919	AT1G02910	655577	658148	-	upstream	-671	671	Upstream
chr1	746562	746763	202	*	137	90.7	0	28.07	X1.746662	AT1G03100	743885	746479	-	upstream	-83	83	Upstream
chr1	754605	754806	202	*	140	98	0	32.61	X1.754705	AT1G03130	753307	754198	-	upstream	-407	407	Upstream
chr1	813097	813298	202	*	197	234.8	0	153.67	X1.813197	AT1G03300	811033	813086	-	upstream	-11	11	Upstream
chr1	813097	813298	202	*	197	234.8	0	153.67	X1.813197	AT1G03310	813471	816749	+	upstream	-374	173	Upstream
chr1	825941	826142	202	*	132	79	0	20.83	X1.826041	AT1G03365	826569	830383	+	upstream	-628	427	Upstream
chr1	880335	880536	202	*	134	84.3	0	24.36	X1.880435	AT1G03520	877862	880158	-	upstream	-177	177	Upstream
chr1	906026	906227	202	*	135	85	0	24.36	X1.906126	AT1G03620	904319	906186	-	overlapStart	160	41	Upstream
chr1	916877	917078	202	*	125	61.5	0	11.81	X1.916977	AT1G03670	914222	916222	-	upstream	-655	655	Upstream
chr1	984035	984236	202	*	119	46	0	5.27	X1.984135	AT1G03870	982506	983540	-	upstream	-495	495	Upstream
chr1	1056482	1056683	202	*	127	67	0	14.23	X1.1056582	AT1G04090	1057151	1059419	+	upstream	-669	468	Upstream
chr1	1058860	1059061	202	*	114	35.4	0	2.34	X1.1058960	AT1G04100	1059506	1061191	+	upstream	-646	445	Upstream
chr1	1184062	1184263	202	*	129	71	0	16.44	X1.1184162	AT1G04390	1179363	1183704	-	upstream	-358	358	Upstream
chr1	1219998	1220199	202	*	121	52.3	0	7.88	X1.1220098	AT1G04490	1217948	1220137	-	overlapStart	139	62	Upstream
chr1	1302135	1302336	202	*	121	51	0	7.09	X1.1302235	AT1G04660	1300486	1301773	-	upstream	-362	362	Upstream
chr1	1572322	1572523	202	*	121	51	0	7.09	X1.1572422	AT1G05370	1569192	1572280	-	upstream	-42	42	Upstream
chr1	1596115	1596316	202	*	176	185.9	0	104.79	X1.1596215	AT1G05430	1594057	1595818	-	upstream	-297	297	Upstream
chr1	1644074	1644275	202	*	152	127.7	0	54.41	X1.1644174	AT1G05550	1640959	1643917	-	upstream	-157	157	Upstream
chr1	1762075	1762276	202	*	132	77.7	0	20.26	X1.1762175	AT1G05835	1762224	1762814	+	overlapStart	-149	52	Upstream
chr1	1775153	1775354	202	*	124	58	0	9.99	X1.1775253	AT1G05880	1775643	1778553	+	upstream	-490	289	Upstream
chr1	1784193	1784394	202	*	124	59.8	0	10.88	X1.1784293	AT1G05894	1784803	1786292	+	upstream	-610	409	Upstream
chr1	1789296	1789497	202	*	129	72.4	0	17.51	X1.1789396	AT1G05910	1790224	1796647	+	upstream	-928	727	Upstream
chr1	1843449	1843650	202	*	128	68	0	14.72	X1.1843549	AT1G06080	1843568	1846302	+	overlapStart	-119	82	Upstream
chr1	1860640	1860841	202	*	125	62	0	11.81	X1.1860740	AT1G06130	1857767	1860730	-	overlapStart	90	90	Upstream
chr1	1888987	1889188	202	*	129	71.4	0	16.97	X1.1889087	AT1G06180	1889408	1891158	+	upstream	-421	220	Upstream
chr1	1899511	1899712	202	*	165	158.5	0	80.17	X1.1899611	AT1G06220	1899964	1904873	+	upstream	-453	252	Upstream
chr1	1937317	1937518	202	*	152	127.5	0	54.41	X1.1937417	AT1G06350	1935293	1936819	-	upstream	-498	498	Upstream
chr1	1940642	1940843	202	*	116	39	0	3.39	X1.1940742	AT1G06360	1938963	1940459	-	upstream	-183	183	Upstream
chr1	1958792	1958993	202	*	119	47.7	0	5.97	X1.1958892	AT1G06420	1958923	1959947	+	overlapStart	-131	70	Upstream
chr1	1989335	1989536	202	*	119	47	0	5.62	X1.1989435	AT1G06500	1989479	1990730	+	overlapStart	-144	57	Upstream
chr1	2035352	2035553	202	*	170	170	0	89.98	X1.2035452	AT1G06650	2035839	2037366	+	upstream	-487	286	Upstream
chr1	2047524	2047725	202	*	121	51.8	0	7.48	X1.2047624	AT1G06680	2047825	2049418	+	upstream	-301	100	Upstream
chr1	2086156	2086357	202	*	123	57	0	9.55	X1.2086256	AT1G06790	2087232	2089786	+	upstream	-1076	875	Upstream
chr1	2121184	2121385	202	*	137	91.2	0	28.7	X1.2121284	AT1G06900	2114927	2120745	-	upstream	-439	439	Upstream
chr1	2187105	2187306	202	*	117	41.6	0	3.98	X1.2187205	AT1G07130	2187776	2188733	+	upstream	-671	470	Upstream
chr1	2223282	2223483	202	*	115	37	0	2.59	X1.2223382	AT1G07230	2220253	2222982	-	upstream	-300	300	Upstream
chr1	2223282	2223483	202	*	115	37	0	2.59	X1.2223382	AT1G07240	2223691	2225452	+	upstream	-409	208	Upstream
chr1	2268107	2268308	202	*	128	67.8	0	14.72	X1.2268207	AT1G07380	2264829	2268306	-	overlapStart	199	2	Upstream
chr1	2301954	2302155	202	*	177	187.8	0	106.68	X1.2302054	AT1G07490	2301380	2302021	-	overlapStart	67	67	Upstream
chr1	2316833	2317034	202	*	132	79	0	20.83	X1.2316933	AT1G07530	2313582	2316469	-	upstream	-364	364	Upstream
chr1	2381241	2381442	202	*	125	61.4	0	11.81	X1.2381341	AT1G07705	2381615	2386092	+	upstream	-374	173	Upstream
chr1	2423428	2423629	202	*	114	34.9	0	2.11	X1.2423528	AT1G07840	2424054	2426676	+	upstream	-626	425	Upstream
chr1	2436573	2436774	202	*	117	42	0	3.97	X1.2436673	AT1G07880	2434030	2435763	-	upstream	-810	810	Upstream
chr1	2441964	2442165	202	*	125	62	0	11.8	X1.2442064	AT1G07900	2442622	2443632	+	upstream	-658	457	Upstream
chr1	2485484	2485685	202	*	116	39.9	0	3.39	X1.2485584	AT1G08000	2483240	2485109	-	upstream	-375	375	Upstream
chr1	2488165	2488366	202	*	123	57	0	9.55	X1.2488265	AT1G08010	2485906	2488027	-	upstream	-138	138	Upstream
chr1	2542603	2542804	202	*	169	167.7	0	88.17	X1.2542703	AT1G08125	2539614	2542334	-	upstream	-269	269	Upstream
chr1	2710761	2710962	202	*	135	85	0	24.36	X1.2710861	AT1G08560	2709632	2710912	-	overlapStart	151	50	Upstream
chr1	2747869	2748070	202	*	123	57.4	0	9.99	X1.2747969	AT1G08630	2743761	2747967	-	overlapStart	98	98	Upstream
chr1	2804316	2804517	202	*	181	197	0	115.31	X1.2804416	AT1G08760	2805371	2808621	+	upstream	-1055	854	Upstream
chr1	2811349	2811550	202	*	119	48	0	5.97	X1.2811449	AT1G08780	2809778	2811191	-	upstream	-158	158	Upstream
chr1	2982894	2983095	202	*	117	43	0	4.28	X1.2982994	AT1G09230	2979520	2982624	-	upstream	-270	270	Upstream
chr1	3031021	3031222	202	*	182	199.5	0	118.23	X1.3031121	AT1G09390	3031203	3033582	+	overlapStart	-182	19	Upstream
chr1	3038500	3038701	202	*	116	39	0	3.11	X1.3038600	AT1G09415	3037754	3038408	-	upstream	-92	92	Upstream
chr1	3072089	3072290	202	*	116	39	0	3.11	X1.3072189	AT1G09520	3070946	3072050	-	upstream	-39	39	Upstream
chr1	3105911	3106112	202	*	115	38.5	0	3.11	X1.3106011	AT1G09590	3106502	3107772	+	upstream	-591	390	Upstream
chr1	3156967	3157168	202	*	169	168	0	88.17	X1.3157067	AT1G09750	3157501	3159148	+	upstream	-534	333	Upstream
chr1	3170951	3171152	202	*	141	100.6	0	34.63	X1.3171051	AT1G09790	3168482	3170819	-	upstream	-132	132	Upstream
chr1	3180247	3180448	202	*	139	94.7	0	30.64	X1.3180347	AT1G09800	3176883	3180421	-	overlapStart	174	27	Upstream
chr1	3188873	3189074	202	*	196	233	0	151.58	X1.3188973	AT1G09815	3189369	3190242	+	upstream	-496	295	Upstream
chr1	3241461	3241662	202	*	248	358	0	294.49	X1.3241561	AT1G09950	3240606	3241632	-	overlapStart	171	30	Upstream
chr1	3301567	3301768	202	*	152	126	0	52.85	X1.3301667	AT1G10100	3300697	3301489	-	upstream	-78	78	Upstream
chr1	3468971	3469172	202	*	123	57.9	0	9.99	X1.3469071	AT1G10522	3469580	3471488	+	upstream	-609	408	Upstream
chr1	3472586	3472787	202	*	120	49	0	6.33	X1.3472686	AT1G10530	3471456	3472672	-	overlapStart	86	86	Upstream
chr1	3499510	3499711	202	*	124	59.4	0	10.88	X1.3499610	AT1G10586	3496928	3499439	-	upstream	-71	71	Upstream
chr1	3518085	3518286	202	*	126	64.2	0	13.24	X1.3518185	AT1G10640	3515365	3517888	-	upstream	-197	197	Upstream
chr1	3605432	3605633	202	*	168	166	0	86.37	X1.3605532	AT1G10820	3600910	3605076	-	upstream	-356	356	Upstream
chr1	3663203	3663404	202	*	207	259.9	0	180.39	X1.3663303	AT1G10960	3664386	3665039	+	upstream	-1183	982	Upstream
chr1	3684426	3684627	202	*	115	38	0	2.84	X1.3684526	AT1G11060	3684568	3689847	+	overlapStart	-142	59	Upstream
chr1	3693649	3693850	202	*	118	44.2	0	4.93	X1.3693749	AT1G11070	3690212	3693648	-	upstream	-1	1	Upstream
chr1	3714729	3714930	202	*	122	54	0	3.77	X1.3714829	AT1G11112	3712999	3713735	-	upstream	-994	994	Upstream
chr1	3714030	3714231	202	*	165	157	0	57.14	X1.3714130	AT1G11120	3715184	3717320	+	upstream	-1154	953	Upstream
chr1	3722787	3722988	202	*	128	69.9	0	9.98	X1.3722887	AT1G11130	3722857	3727450	+	overlapStart	-70	70	Upstream
chr1	3787413	3787614	202	*	160	147	0	69.86	X1.3787513	AT1G11270	3780429	3786990	-	upstream	-423	423	Upstream
chr1	3840731	3840932	202	*	114	35.6	0	2.34	X1.3840831	AT1G11410	3841286	3844432	+	upstream	-555	354	Upstream
chr1	3901781	3901982	202	*	144	106.3	0	38.78	X1.3901881	AT1G11600	3902012	3903782	+	upstream	-231	30	Upstream
chr1	3909622	3909823	202	*	277	428.9	0	999	X1.3909722	AT1G11610	3906862	3909338	-	upstream	-284	284	Upstream
chr1	3914089	3914290	202	*	115	37	0	2.59	X1.3914189	AT1G11650	3914774	3918176	+	upstream	-685	484	Upstream
chr1	3972180	3972381	202	*	133	81.6	0	22.57	X1.3972280	AT1G11755	3969681	3971840	-	upstream	-340	340	Upstream
chr1	4038827	4039028	202	*	114	35.3	0	2.34	X1.4038927	AT1G11950	4034587	4038758	-	upstream	-69	69	Upstream
chr1	4044048	4044249	202	*	159	143	0	66.51	X1.4044148	AT1G11960	4039711	4043880	-	upstream	-168	168	Upstream
chr1	4044048	4044249	202	*	159	143	0	66.51	X1.4044148	AT1G11970	4044370	4044669	+	upstream	-322	121	Upstream
chr1	4072071	4072272	202	*	173	176.7	0	96.38	X1.4072171	AT1G12050	4072752	4076207	+	upstream	-681	480	Upstream
chr1	4171638	4171839	202	*	148	116	0	45.27	X1.4171738	AT1G12270	4172075	4174775	+	upstream	-437	236	Upstream
chr1	4247163	4247364	202	*	117	43	0	4.28	X1.4247263	AT1G12460	4247249	4250630	+	overlapStart	-86	86	Upstream
chr1	4463329	4463530	202	*	149	119	0	47.51	X1.4463429	AT1G13100	4463924	4465538	+	upstream	-595	394	Upstream
chr1	4480732	4480933	202	*	123	56.4	0	9.55	X1.4480832	AT1G13140	4478491	4480327	-	upstream	-405	405	Upstream
chr1	4484222	4484423	202	*	129	70.2	0	16.44	X1.4484322	AT1G13160	4484584	4488577	+	upstream	-362	161	Upstream
chr1	4514367	4514568	202	*	150	123	0	50.54	X1.4514467	AT1G13210	4508963	4513938	-	upstream	-429	429	Upstream
chr1	4529935	4530136	202	*	211	269	0	190.27	X1.4530035	AT1G13250	4528623	4530063	-	overlapStart	128	73	Upstream
chr1	4555965	4556166	202	*	114	35.5	0	2.34	X1.4556065	AT1G13300	4556892	4558708	+	upstream	-927	726	Upstream
chr1	4611053	4611254	202	*	119	45.9	0	5.27	X1.4611153	AT1G13440	4608196	4610647	-	upstream	-406	406	Upstream
chr1	4642291	4642492	202	*	149	119	0	47.51	X1.4642391	AT1G13560	4638514	4642104	-	upstream	-187	187	Upstream
chr1	4673582	4673783	202	*	115	37	0	2.59	X1.4673682	AT1G13635	4674152	4676170	+	upstream	-570	369	Upstream
chr1	4704525	4704726	202	*	172	174.9	0	94.54	X1.4704625	AT1G13710	4702725	4704657	-	overlapStart	132	69	Upstream
chr1	4724113	4724314	202	*	122	55.3	0	9.12	X1.4724213	AT1G13780	4724608	4726499	+	upstream	-495	294	Upstream
chr1	4822494	4822695	202	*	140	98	0	32.61	X1.4822594	AT1G14080	4822528	4824414	+	overlapStart	-34	34	Upstream
chr1	4907469	4907670	202	*	119	48	0	5.97	X1.4907569	AT1G14350	4907953	4911168	+	upstream	-484	283	Upstream
chr1	4921453	4921654	202	*	126	64.6	0	13.24	X1.4921553	AT1G14380	4918010	4921596	-	overlapStart	143	58	Upstream
chr1	4928877	4929078	202	*	121	53	0	7.88	X1.4928977	AT1G14400	4927011	4928690	-	upstream	-187	187	Upstream
chr1	5036659	5036860	202	*	127	66.4	0	7.35	X1.5036759	AT1G14660	5031950	5036477	-	upstream	-182	182	Upstream
chr1	5036659	5036860	202	*	127	66.4	0	7.35	X1.5036759	AT1G14670	5037612	5040528	+	upstream	-953	752	Upstream
chr1	5047590	5047791	202	*	121	51.2	0	7.48	X1.5047690	AT1G14687	5047803	5048612	+	upstream	-213	12	Upstream
chr1	5085131	5085332	202	*	155	134	0	59.16	X1.5085231	AT1G14760	5084352	5085213	-	overlapStart	82	82	Upstream
chr1	5112093	5112294	202	*	172	174	0	93.62	X1.5112193	AT1G14830	5107421	5111670	-	upstream	-423	423	Upstream
chr1	5134181	5134382	202	*	162	150	0	72.4	X1.5134281	AT1G14880	5132535	5133716	-	upstream	-465	465	Upstream
chr1	5183228	5183429	202	*	129	72	0	16.97	X1.5183328	AT1G15050	5182256	5183243	-	overlapStart	15	15	Upstream
chr1	5204323	5204524	202	*	352	609	0	999	X1.5204423	AT1G15125	5204625	5205912	+	upstream	-302	101	Upstream
chr1	5212452	5212653	202	*	122	54	0	8.29	X1.5212552	AT1G15140	5210206	5212349	-	upstream	-103	103	Upstream
chr1	5212452	5212653	202	*	122	54	0	8.29	X1.5212552	AT1G15150	5212615	5214858	+	overlapStart	-163	38	Upstream
chr1	5215315	5215516	202	*	150	121.7	0	49.78	X1.5215415	AT1G15160	5215475	5217545	+	overlapStart	-160	41	Upstream
chr1	5232035	5232236	202	*	132	79.6	0	21.41	X1.5232135	AT1G15200	5228300	5231184	-	upstream	-851	851	Upstream
chr1	5237909	5238110	202	*	201	244	0	163.16	X1.5238009	AT1G15215	5238065	5240051	+	overlapStart	-156	45	Upstream
chr1	5241764	5241965	202	*	129	70.2	0	16.44	X1.5241864	AT1G15220	5240029	5241538	-	upstream	-226	226	Upstream
chr1	5250350	5250551	202	*	118	45	0	4.93	X1.5250450	AT1G15250	5248664	5249474	-	upstream	-876	876	Upstream
chr1	5249615	5249816	202	*	142	103.6	0	36.68	X1.5249715	AT1G15260	5249760	5250573	+	overlapStart	-145	56	Upstream
chr1	5265238	5265439	202	*	181	197	0	115.31	X1.5265338	AT1G15290	5257046	5264942	-	upstream	-296	296	Upstream
chr1	5280263	5280464	202	*	128	70	0	15.92	X1.5280363	AT1G15350	5278260	5279877	-	upstream	-386	386	Upstream
chr1	5286664	5286865	202	*	161	147.7	0	70.7	X1.5286764	AT1G15370	5287047	5288577	+	upstream	-383	182	Upstream
chr1	5323897	5324098	202	*	130	73.9	0	18.05	X1.5323997	AT1G15490	5320615	5323895	-	upstream	-2	2	Upstream
chr1	5328445	5328646	202	*	117	42.9	0	4.28	X1.5328545	AT1G15510	5329111	5331711	+	upstream	-666	465	Upstream
chr1	5425091	5425292	202	*	121	51.7	0	7.48	X1.5425191	AT1G15760	5425714	5426322	+	upstream	-623	422	Upstream
chr1	5502178	5502379	202	*	144	106.4	0	38.78	X1.5502278	AT1G16022	5501396	5501959	-	upstream	-219	219	Upstream
chr1	5501218	5501419	202	*	141	99.2	0	33.95	X1.5501318	AT1G16025	5501505	5501959	+	upstream	-287	86	Upstream
chr1	5504089	5504290	202	*	114	36	0	2.34	X1.5504189	AT1G16040	5504735	5506611	+	upstream	-646	445	Upstream
chr1	5548252	5548453	202	*	116	39.8	0	3.39	X1.5548352	AT1G16220	5548653	5550553	+	upstream	-401	200	Upstream
chr1	5580453	5580654	202	*	235	326.8	0	256.94	X1.5580553	AT1G16320	5580855	5582143	+	upstream	-402	201	Upstream
chr1	5590801	5591002	202	*	147	114.9	0	44.54	X1.5590901	AT1G16340	5587790	5590651	-	upstream	-150	150	Upstream
chr1	5590801	5591002	202	*	147	114.9	0	44.54	X1.5590901	AT1G16350	5590951	5593007	+	overlapStart	-150	51	Upstream
chr1	5687460	5687661	202	*	117	42.9	0	4.28	X1.5687560	AT1G16650	5687943	5691198	+	upstream	-483	282	Upstream
chr1	5894831	5895032	202	*	129	71.3	0	16.97	X1.5894931	AT1G17235	5895351	5895710	+	upstream	-520	319	Upstream
chr1	5903651	5903852	202	*	178	188.9	0	107.63	X1.5903751	AT1G17250	5901169	5903439	-	upstream	-212	212	Upstream
chr1	5903651	5903852	202	*	178	188.9	0	107.63	X1.5903751	AT1G17260	5904058	5908898	+	upstream	-407	206	Upstream
chr1	5926824	5927025	202	*	118	45.7	0	5.27	X1.5926924	AT1G17300	5926994	5927784	+	overlapStart	-170	31	Upstream
chr1	6052777	6052978	202	*	120	49.2	0	6.71	X1.6052877	AT1G17590	6050193	6052568	-	upstream	-209	209	Upstream
chr1	6071890	6072091	202	*	137	90	0	27.43	X1.6071990	AT1G17650	6069477	6072012	-	overlapStart	122	79	Upstream
chr1	6101983	6102184	202	*	119	47	0	5.62	X1.6102083	AT1G17744	6100961	6101983	-	overlapStart	0	0	Upstream
chr1	6148698	6148899	202	*	120	49	0	6.33	X1.6148798	AT1G17860	6149301	6150038	+	upstream	-603	402	Upstream
chr1	6223809	6224010	202	*	118	45	0	4.93	X1.6223909	AT1G18090	6224501	6227822	+	upstream	-692	491	Upstream
chr1	6278559	6278760	202	*	122	53.7	0	8.29	X1.6278659	AT1G18250	6276788	6278150	-	upstream	-409	409	Upstream
chr1	6308930	6309131	202	*	126	65	0	13.74	X1.6309030	AT1G18330	6305966	6308013	-	upstream	-917	917	Upstream
chr1	6366016	6366217	202	*	146	113	0	43.07	X1.6366116	AT1G18486	6366397	6366753	+	upstream	-381	180	Upstream
chr1	6366016	6366217	202	*	146	113	0	43.07	X1.6366116	AT1G18490	6366520	6368849	+	upstream	-504	303	Upstream
chr1	6399725	6399926	202	*	131	77.1	0	20.27	X1.6399825	AT1G18600	6400404	6402791	+	upstream	-679	478	Upstream
chr1	6418969	6419170	202	*	165	157	0	78.42	X1.6419069	AT1G18640	6416357	6418690	-	upstream	-279	279	Upstream
chr1	6431111	6431312	202	*	123	56.1	0	9.55	X1.6431211	AT1G18670	6426898	6430696	-	upstream	-415	415	Upstream
chr1	6433715	6433916	202	*	162	151.9	0	74.1	X1.6433815	AT1G18680	6431938	6433464	-	upstream	-251	251	Upstream
chr1	6520604	6520805	202	*	117	42.6	0	4.29	X1.6520704	AT1G18880	6520748	6523368	+	overlapStart	-144	57	Upstream
chr1	6688184	6688385	202	*	122	55.4	0	9.12	X1.6688284	AT1G19350	6688522	6690414	+	upstream	-338	137	Upstream
chr1	6703629	6703830	202	*	120	49.9	0	6.71	X1.6703729	AT1G19390	6700772	6703368	-	upstream	-261	261	Upstream
chr1	6740913	6741114	202	*	133	80.3	0	21.99	X1.6741013	AT1G19470	6741296	6742534	+	upstream	-383	182	Upstream
chr1	6746226	6746427	202	*	216	280.3	0	203.65	X1.6746326	AT1G19485	6746778	6751507	+	upstream	-552	351	Upstream
chr1	6781850	6782051	202	*	141	99.8	0	33.95	X1.6781950	AT1G19610	6781483	6782039	-	overlapStart	189	12	Upstream
chr1	6809584	6809785	202	*	125	61	0	11.34	X1.6809684	AT1G19690	6807715	6809569	-	upstream	-15	15	Upstream
chr1	6917190	6917391	202	*	116	40	0	3.39	X1.6917290	AT1G19920	6914613	6916805	-	upstream	-385	385	Upstream
chr1	6934939	6935140	202	*	116	39.8	0	3.39	X1.6935039	AT1G19990	6935218	6936693	+	upstream	-279	78	Upstream
chr1	6975311	6975512	202	*	116	39	0	3.11	X1.6975411	AT1G20120	6975388	6977264	+	overlapStart	-77	77	Upstream
chr1	6990852	6991053	202	*	158	141	0	62.66	X1.6990952	AT1G20150	6987332	6990361	-	upstream	-491	491	Upstream
chr1	7076197	7076398	202	*	118	45.6	0	5.27	X1.7076297	AT1G20400	7072192	7075838	-	upstream	-359	359	Upstream
chr1	7105743	7105944	202	*	117	43	0	4.28	X1.7105843	AT1G20510	7103454	7105881	-	overlapStart	138	63	Upstream
chr1	7122090	7122291	202	*	126	63.7	0	12.76	X1.7122190	AT1G20560	7119676	7121817	-	upstream	-273	273	Upstream
chr1	7128988	7129189	202	*	116	39	0	3.11	X1.7129088	AT1G20575	7126772	7128745	-	upstream	-243	243	Upstream
chr1	7160729	7160930	202	*	120	50	0	6.71	X1.7160829	AT1G20650	7158244	7160526	-	upstream	-203	203	Upstream
chr1	7182547	7182748	202	*	114	36	0	2.34	X1.7182647	AT1G20700	7182558	7184009	+	overlapStart	-11	11	Upstream
chr1	7193742	7193943	202	*	116	39.5	0	3.39	X1.7193842	AT1G20730	7194256	7195575	+	upstream	-514	313	Upstream
chr1	7258914	7259115	202	*	124	58	0	9.99	X1.7259014	AT1G20860	7254007	7258677	-	upstream	-237	237	Upstream
chr1	7384523	7384724	202	*	160	147	0	69.86	X1.7384623	AT1G21090	7384629	7386558	+	overlapStart	-106	95	Upstream
chr1	7438970	7439171	202	*	223	299	0	224.14	X1.7439070	AT1G21250	7439266	7442113	+	upstream	-296	95	Upstream
chr1	7444575	7444776	202	*	128	69	0	15.4	X1.7444675	AT1G21270	7444931	7447549	+	upstream	-356	155	Upstream
chr1	7504043	7504244	202	*	116	41	0	3.68	X1.7504143	AT1G21440	7502159	7504175	-	overlapStart	132	69	Upstream
chr1	7532803	7533004	202	*	116	39.8	0	3.39	X1.7532903	AT1G21510	7531312	7532629	-	upstream	-174	174	Upstream
chr1	7535280	7535481	202	*	133	80	0	21.41	X1.7535380	AT1G21520	7534154	7534789	-	upstream	-491	491	Upstream
chr1	7554718	7554919	202	*	182	199	0	117.26	X1.7554818	AT1G21560	7554784	7557056	+	overlapStart	-66	66	Upstream
chr1	7653875	7654076	202	*	118	44	0	4.6	X1.7653975	AT1G21790	7654184	7655883	+	upstream	-309	108	Upstream
chr1	8068939	8069140	202	*	127	66.3	0	14.23	X1.8069039	AT1G22790	8069487	8071562	+	upstream	-548	347	Upstream
chr1	8078706	8078907	202	*	207	259.9	0	180.39	X1.8078806	AT1G22840	8079287	8080574	+	upstream	-581	380	Upstream
chr1	8095296	8095497	202	*	130	73	0	17.51	X1.8095396	AT1G22880	8095502	8097709	+	upstream	-206	5	Upstream
chr1	8100868	8101069	202	*	140	97	0	31.95	X1.8100968	AT1G22885	8101565	8102375	+	upstream	-697	496	Upstream
chr1	8142826	8143027	202	*	133	81.2	0	22.57	X1.8142926	AT1G23000	8143404	8145070	+	upstream	-578	377	Upstream
chr1	8147223	8147424	202	*	120	48.7	0	6.34	X1.8147323	AT1G23010	8147264	8149813	+	overlapStart	-41	41	Upstream
chr1	8215271	8215472	202	*	136	87.1	0	25.1	X1.8215371	AT1G23180	8215721	8219584	+	upstream	-450	249	Upstream
chr1	8219700	8219901	202	*	136	88	0	26.19	X1.8219800	AT1G23190	8219869	8224469	+	overlapStart	-169	32	Upstream
chr1	8302908	8303109	202	*	119	47	0	5.62	X1.8303008	AT1G23380	8297291	8302651	-	upstream	-257	257	Upstream
chr1	8401755	8401956	202	*	142	103.7	0	36.68	X1.8401855	AT1G23760	8402046	8404301	+	upstream	-291	90	Upstream
chr1	8415063	8415264	202	*	123	55.9	0	9.12	X1.8415163	AT1G23800	8412051	8414879	-	upstream	-184	184	Upstream
chr1	8424389	8424590	202	*	150	122.3	0	50.54	X1.8424489	AT1G23830	8422960	8424088	-	upstream	-301	301	Upstream
chr1	8425527	8425728	202	*	123	57	0	9.55	X1.8425627	AT1G23840	8424297	8425376	-	upstream	-151	151	Upstream
chr1	8486462	8486663	202	*	209	264	0	184.77	X1.8486562	AT1G23980	8484703	8486002	-	upstream	-460	460	Upstream
chr1	8556448	8556649	202	*	163	154	0	75.82	X1.8556548	AT1G24160	8553411	8556555	-	overlapStart	107	94	Upstream
chr1	8641046	8641247	202	*	114	35	0	2.11	X1.8641146	AT1G24350	8638520	8640825	-	upstream	-221	221	Upstream
chr1	8664080	8664281	202	*	135	86.6	0	25.57	X1.8664180	AT1G24450	8664153	8665289	+	overlapStart	-73	73	Upstream
chr1	8699688	8699889	202	*	137	90.6	0	28.07	X1.8699788	AT1G24540	8699751	8701421	+	overlapStart	-63	63	Upstream
chr1	8763471	8763672	202	*	169	169	0	89.07	X1.8763571	AT1G24764	8759533	8763355	-	upstream	-116	116	Upstream
chr1	8856152	8856353	202	*	118	44.8	0	4.93	X1.8856252	AT1G25260	8853959	8855872	-	upstream	-280	280	Upstream
chr1	8857569	8857770	202	*	129	70.9	0	16.44	X1.8857669	AT1G25270	8857726	8859909	+	overlapStart	-157	44	Upstream
chr1	8874754	8874955	202	*	117	43	0	4.28	X1.8874854	AT1G25310	8874124	8874834	-	overlapStart	80	80	Upstream
chr1	8877762	8877963	202	*	118	45	0	4.93	X1.8877862	AT1G25320	8877857	8880310	+	overlapStart	-95	95	Upstream
chr1	8915875	8916076	202	*	123	56	0	9.12	X1.8915975	AT1G25420	8916059	8918232	+	overlapStart	-184	17	Upstream
chr1	8995787	8995988	202	*	185	206.4	0	125.12	X1.8995887	AT1G25570	8991826	8995496	-	upstream	-291	291	Upstream
chr1	9023970	9024171	202	*	193	225.4	0	144.33	X1.9024070	AT1G26100	9022542	9024081	-	overlapStart	111	90	Upstream
chr1	9113235	9113436	202	*	118	44	0	4.6	X1.9113335	AT1G26340	9113900	9114977	+	upstream	-665	464	Upstream
chr1	9286466	9286667	202	*	123	56	0	9.12	X1.9286566	AT1G26800	9285099	9286324	-	upstream	-142	142	Upstream
chr1	9312837	9313038	202	*	260	387	0	999	X1.9312937	AT1G26870	9312856	9314983	+	overlapStart	-19	19	Upstream
chr1	9427682	9427883	202	*	156	136	0	60.77	X1.9427782	AT1G27140	9427858	9428716	+	overlapStart	-176	25	Upstream
chr1	9492364	9492565	202	*	115	38	0	3.11	X1.9492464	AT1G27330	9492964	9494069	+	upstream	-600	399	Upstream
chr1	9494944	9495145	202	*	121	51	0	7.09	X1.9495044	AT1G27340	9495520	9498085	+	upstream	-576	375	Upstream
chr1	9515056	9515257	202	*	128	69.1	0	15.92	X1.9515156	AT1G27390	9513089	9515001	-	upstream	-55	55	Upstream
chr1	9515056	9515257	202	*	128	69.1	0	15.92	X1.9515156	AT1G27400	9515135	9516940	+	overlapStart	-79	79	Upstream
chr1	9638563	9638764	202	*	115	37	0	2.59	X1.9638663	AT1G27695	9639024	9640151	+	upstream	-461	260	Upstream
chr1	9753948	9754149	202	*	118	45	0	4.93	X1.9754048	AT1G27990	9752799	9753952	-	overlapStart	4	4	Upstream
chr1	9762820	9763021	202	*	114	36	0	2.34	X1.9762920	AT1G28010	9763436	9768068	+	upstream	-616	415	Upstream
chr1	9834674	9834875	202	*	116	39.8	0	3.39	X1.9834774	AT1G28140	9832816	9834427	-	upstream	-247	247	Upstream
chr1	9973601	9973802	202	*	130	74	0	18.05	X1.9973701	AT1G28400	9972384	9973793	-	overlapStart	192	9	Upstream
chr1	10038156	10038357	202	*	193	227	0	145.36	X1.10038256	AT1G28550	10036966	10037698	-	upstream	-458	458	Upstream
chr1	10117636	10117837	202	*	118	45	0	4.93	X1.10117736	AT1G29010	10117715	10119085	+	overlapStart	-79	79	Upstream
chr1	10127433	10127634	202	*	117	42	0	3.97	X1.10127533	AT1G29025	10124348	10127068	-	upstream	-365	365	Upstream
chr1	10250012	10250213	202	*	116	39	0	3.11	X1.10250112	AT1G29300	10247780	10249594	-	upstream	-418	418	Upstream
chr1	10371767	10371968	202	*	131	75	0	18.59	X1.10371867	AT1G29660	10371839	10373766	+	overlapStart	-72	72	Upstream
chr1	10382450	10382651	202	*	123	56	0	9.12	X1.10382550	AT1G29690	10379020	10382123	-	upstream	-327	327	Upstream
chr1	10388381	10388582	202	*	116	41	0	3.68	X1.10388481	AT1G29700	10384981	10387441	-	upstream	-940	940	Upstream
chr1	10386621	10386822	202	*	135	86	0	24.96	X1.10386721	AT1G29710	10387673	10389100	+	upstream	-1052	851	Upstream
chr1	10400304	10400505	202	*	171	172.9	0	92.7	X1.10400404	AT1G29720	10393797	10399873	-	upstream	-431	431	Upstream
chr1	10412916	10413117	202	*	167	161.9	0	82.81	X1.10413016	AT1G29740	10407379	10412997	-	overlapStart	81	81	Upstream
chr1	10424233	10424434	202	*	125	62	0	11.8	X1.10424333	AT1G29770	10424576	10425801	+	upstream	-343	142	Upstream
chr1	10426498	10426699	202	*	134	84.5	0	24.36	X1.10426598	AT1G29780	10426950	10427615	+	upstream	-452	251	Upstream
chr1	10473345	10473546	202	*	116	40.4	0	3.68	X1.10473445	AT1G29910	10472280	10473299	-	upstream	-46	46	Upstream
chr1	10491427	10491628	202	*	149	120	0	48.26	X1.10491527	AT1G29950	10491698	10494598	+	upstream	-271	70	Upstream
chr1	10491427	10491628	202	*	149	120	0	48.26	X1.10491527	AT1G29951	10491975	10494598	+	upstream	-548	347	Upstream
chr1	10491427	10491628	202	*	149	120	0	48.26	X1.10491527	AT1G29952	10491975	10494598	+	upstream	-548	347	Upstream
chr1	10494059	10494260	202	*	115	37	0	2.59	X1.10494159	AT1G29960	10494707	10496170	+	upstream	-648	447	Upstream
chr1	10507328	10507529	202	*	123	57	0	9.55	X1.10507428	AT1G29990	10507593	10509098	+	upstream	-265	64	Upstream
chr1	10892108	10892309	202	*	114	34.5	0	2.11	X1.10892208	AT1G30700	10892570	10894572	+	upstream	-462	261	Upstream
chr1	11239529	11239730	202	*	192	223.9	0	142.27	X1.11239629	AT1G31370	11238298	11239363	-	upstream	-166	166	Upstream
chr1	11241117	11241318	202	*	114	35.8	0	2.34	X1.11241217	AT1G31380	11240451	11241099	-	upstream	-18	18	Upstream
chr1	11244451	11244652	202	*	124	60.1	0	11.34	X1.11244551	AT1G31390	11243191	11244392	-	upstream	-59	59	Upstream
chr1	11249568	11249769	202	*	117	42	0	3.97	X1.11249668	AT1G31410	11246914	11249359	-	upstream	-209	209	Upstream
chr1	11249568	11249769	202	*	117	42	0	3.97	X1.11249668	AT1G31420	11249600	11253915	+	overlapStart	-32	32	Upstream
chr1	11396231	11396432	202	*	127	66	0	13.74	X1.11396331	AT1G31790	11394690	11396018	-	upstream	-213	213	Upstream
chr1	11396231	11396432	202	*	127	66	0	13.74	X1.11396331	AT1G31800	11396402	11399714	+	overlapStart	-171	30	Upstream
chr1	11444829	11445030	202	*	115	37.9	0	2.84	X1.11444929	AT1G31880	11445490	11450189	+	upstream	-661	460	Upstream
chr1	11487521	11487722	202	*	119	46	0	5.27	X1.11487621	AT1G31990	11488016	11489287	+	upstream	-495	294	Upstream
chr1	11514158	11514359	202	*	114	35.8	0	2.34	X1.11514258	AT1G32030	11514594	11515595	+	upstream	-436	235	Upstream
chr1	11540191	11540392	202	*	157	137.8	0	62.4	X1.11540291	AT1G32080	11537342	11539800	-	upstream	-391	391	Upstream
chr1	11595815	11596016	202	*	176	184.9	0	103.84	X1.11595915	AT1G32190	11592955	11595982	-	overlapStart	167	34	Upstream
chr1	11672349	11672550	202	*	117	42	0	3.97	X1.11672449	AT1G32360	11672931	11675339	+	upstream	-582	381	Upstream
chr1	11679168	11679369	202	*	119	46.8	0	5.62	X1.11679268	AT1G32375	11679230	11680679	+	overlapStart	-62	62	Upstream
chr1	11789040	11789241	202	*	126	64	0	12.76	X1.11789140	AT1G32585	11788515	11789177	-	overlapStart	137	64	Upstream
chr1	11877357	11877558	202	*	123	57	0	9.55	X1.11877457	AT1G32790	11874704	11877387	-	overlapStart	30	30	Upstream
chr1	11923642	11923843	202	*	153	129.9	0	55.98	X1.11923742	AT1G32900	11920390	11923766	-	overlapStart	124	77	Upstream
chr1	11925157	11925358	202	*	183	202	0	120.19	X1.11925257	AT1G32910	11925426	11926908	+	upstream	-269	68	Upstream
chr1	11941166	11941367	202	*	119	48	0	5.97	X1.11941266	AT1G32950	11941438	11944760	+	upstream	-272	71	Upstream
chr1	11944621	11944822	202	*	122	54.1	0	8.7	X1.11944721	AT1G32960	11945307	11948650	+	upstream	-686	485	Upstream
chr1	11952595	11952796	202	*	134	84	0	23.76	X1.11952695	AT1G32975	11953089	11953899	+	upstream	-494	293	Upstream
chr1	12109433	12109634	202	*	127	66	0	13.74	X1.12109533	AT1G33400	12104784	12109524	-	overlapStart	91	91	Upstream
chr1	12237785	12237986	202	*	178	189.3	0	108.58	X1.12237885	AT1G33760	12237878	12238598	+	overlapStart	-93	93	Upstream
chr1	12260766	12260967	202	*	120	49.6	0	6.71	X1.12260866	AT1G33800	12261419	12262717	+	upstream	-653	452	Upstream
chr1	12371908	12372109	202	*	114	34.6	0	2.11	X1.12372008	AT1G34030	12370065	12371553	-	upstream	-355	355	Upstream
chr1	12429716	12429917	202	*	198	237.8	0	156.82	X1.12429816	AT1G34130	12429890	12433187	+	overlapStart	-174	27	Upstream
chr1	12450346	12450547	202	*	181	196	0	114.34	X1.12450446	AT1G34190	12451451	12454142	+	upstream	-1105	904	Upstream
chr1	12458581	12458782	202	*	131	76	0	19.14	X1.12458681	AT1G34210	12458670	12462905	+	overlapStart	-89	89	Upstream
chr1	12584387	12584588	202	*	150	122	0	49.77	X1.12584487	AT1G34420	12584587	12587570	+	overlapStart	-200	1	Upstream
chr1	12590116	12590317	202	*	128	70	0	15.92	X1.12590216	AT1G34430	12587752	12590192	-	overlapStart	76	76	Upstream
chr1	12617409	12617610	202	*	185	206	0	124.13	X1.12617509	AT1G34510	12615733	12617032	-	upstream	-377	377	Upstream
chr1	12957513	12957714	202	*	121	51.4	0	7.48	X1.12957613	AT1G35310	12956159	12957090	-	upstream	-423	423	Upstream
chr1	13117349	13117550	202	*	126	64.5	0	13.24	X1.13117449	AT1G35560	13115826	13117235	-	upstream	-114	114	Upstream
chr1	13456193	13456394	202	*	142	102	0	35.31	X1.13456293	AT1G36060	13454496	13456331	-	overlapStart	138	63	Upstream
chr1	15607784	15607985	202	*	136	89.1	0	27.44	X1.15607884	AT1G41830	15603617	15607966	-	overlapStart	182	19	Upstream
chr1	16041343	16041544	202	*	131	76	0	19.14	X1.16041443	AT1G42680	16041656	16042880	+	upstream	-313	112	Upstream
chr1	16137684	16137885	202	*	117	42.9	0	4.28	X1.16137784	AT1G42990	16135852	16137463	-	upstream	-221	221	Upstream
chr1	16150697	16150898	202	*	114	35.7	0	2.34	X1.16150797	AT1G43005	16151095	16152240	+	upstream	-398	197	Upstream
chr1	16646161	16646362	202	*	194	229	0	147.43	X1.16646261	AT1G43890	16646732	16648648	+	upstream	-571	370	Upstream
chr1	16866973	16867174	202	*	116	41	0	3.68	X1.16867073	AT1G44542	16864970	16866605	-	upstream	-368	368	Upstream
chr1	16898441	16898642	202	*	145	110.1	0	41.63	X1.16898541	AT1G44760	16896686	16898612	-	overlapStart	171	30	Upstream
chr1	17123297	17123498	202	*	123	56	0	9.12	X1.17123397	AT1G45201	17123821	17128651	+	upstream	-524	323	Upstream
chr1	17133538	17133739	202	*	125	61	0	11.34	X1.17133638	AT1G45207	17130351	17133548	-	overlapStart	10	10	Upstream
chr1	17224691	17224892	202	*	131	76	0	19.14	X1.17224791	AT1G46264	17224842	17226280	+	overlapStart	-151	50	Upstream
chr1	17539455	17539656	202	*	148	115.9	0	45.27	X1.17539555	AT1G47670	17536667	17539538	-	overlapStart	83	83	Upstream
chr1	17773787	17773988	202	*	124	60	0	10.88	X1.17773887	AT1G48110	17769938	17773493	-	upstream	-294	294	Upstream
chr1	17788146	17788347	202	*	123	57.8	0	9.99	X1.17788246	AT1G48170	17788786	17790093	+	upstream	-640	439	Upstream
chr1	17802790	17802991	202	*	131	75	0	18.59	X1.17802890	AT1G48220	17802863	17804955	+	overlapStart	-73	73	Upstream
chr1	17867198	17867399	202	*	150	121	0	49.02	X1.17867298	AT1G48350	17867204	17868342	+	overlapStart	-6	6	Upstream
chr1	17868307	17868508	202	*	121	52.6	0	7.88	X1.17868407	AT1G48360	17868650	17873032	+	upstream	-343	142	Upstream
chr1	17893090	17893291	202	*	131	76	0	19.14	X1.17893190	AT1G48410	17885633	17892596	-	upstream	-494	494	Upstream
chr1	17913065	17913266	202	*	116	41	0	3.68	X1.17913165	AT1G48470	17913711	17916098	+	upstream	-646	445	Upstream
chr1	17934282	17934483	202	*	115	38	0	2.84	X1.17934382	AT1G48510	17934829	17936915	+	upstream	-547	346	Upstream
chr1	17960887	17961088	202	*	117	42.2	0	4.29	X1.17960987	AT1G48580	17958263	17960610	-	upstream	-277	277	Upstream
chr1	18035426	18035627	202	*	118	45	0	4.93	X1.18035526	AT1G48750	18035967	18036510	+	upstream	-541	340	Upstream
chr1	18176130	18176331	202	*	117	41.7	0	3.98	X1.18176230	AT1G49130	18174740	18176022	-	upstream	-108	108	Upstream
chr1	18276470	18276671	202	*	130	74.6	0	18.59	X1.18276570	AT1G49380	18276707	18279528	+	upstream	-237	36	Upstream
chr1	18290525	18290726	202	*	249	360	0	296.94	X1.18290625	AT1G49430	18291043	18295825	+	upstream	-518	317	Upstream
chr1	18326396	18326597	202	*	114	35	0	2.11	X1.18326496	AT1G49510	18326870	18328610	+	upstream	-474	273	Upstream
chr1	18331798	18331999	202	*	183	202	0	120.19	X1.18331898	AT1G49530	18332429	18333689	+	upstream	-631	430	Upstream
chr1	18363338	18363539	202	*	120	49.2	0	6.71	X1.18363438	AT1G49610	18361679	18363192	-	upstream	-146	146	Upstream
chr1	18376564	18376765	202	*	125	61	0	11.34	X1.18376664	AT1G49640	18375538	18376729	-	overlapStart	165	36	Upstream
chr1	18416096	18416297	202	*	119	47.9	0	5.97	X1.18416196	AT1G49760	18416474	18420083	+	upstream	-378	177	Upstream
chr1	18477849	18478050	202	*	162	151.2	0	74.1	X1.18477949	AT1G49900	18473908	18477643	-	upstream	-206	206	Upstream
chr1	18513300	18513501	202	*	120	50	0	6.71	X1.18513400	AT1G49990	18513628	18515099	+	upstream	-328	127	Upstream
chr1	18560147	18560348	202	*	123	55.7	0	9.12	X1.18560247	AT1G50110	18558017	18560274	-	overlapStart	127	74	Upstream
chr1	18701666	18701867	202	*	115	38	0	2.84	X1.18701766	AT1G50480	18701951	18704938	+	upstream	-285	84	Upstream
chr1	18728577	18728778	202	*	117	42.6	0	4.29	X1.18728677	AT1G50570	18726235	18728289	-	upstream	-288	288	Upstream
chr1	18802142	18802343	202	*	130	74.3	0	18.59	X1.18802242	AT1G50732	18802688	18803363	+	upstream	-546	345	Upstream
chr1	18812453	18812654	202	*	120	50	0	7.09	X1.18812553	AT1G50750	18809184	18812290	-	upstream	-163	163	Upstream
chr1	18909410	18909611	202	*	115	38	0	2.84	X1.18909510	AT1G51000	18909924	18910142	+	upstream	-514	313	Upstream
chr1	18934035	18934236	202	*	156	136.2	0	61.59	X1.18934135	AT1G51100	18934308	18935193	+	upstream	-273	72	Upstream
chr1	19109393	19109594	202	*	117	42	0	3.98	X1.19109493	AT1G51530	19109854	19112157	+	upstream	-461	260	Upstream
chr1	19112699	19112900	202	*	125	61	0	11.34	X1.19112799	AT1G51538	19113183	19115273	+	upstream	-484	283	Upstream
chr1	19144502	19144703	202	*	121	51	0	7.09	X1.19144602	AT1G51630	19141973	19144294	-	upstream	-208	208	Upstream
chr1	19349359	19349560	202	*	132	79	0	20.83	X1.19349459	AT1G52030	19345940	19349088	-	upstream	-271	271	Upstream
chr1	19515014	19515215	202	*	155	134	0	59.16	X1.19515114	AT1G52400	19515143	19518411	+	overlapStart	-129	72	Upstream
chr1	19546418	19546619	202	*	123	56	0	9.12	X1.19546518	AT1G52450	19541684	19546266	-	upstream	-152	152	Upstream
chr1	19617489	19617690	202	*	116	39	0	3.11	X1.19617589	AT1G52670	19614942	19617572	-	overlapStart	83	83	Upstream
chr1	19640153	19640354	202	*	114	34.5	0	2.11	X1.19640253	AT1G52710	19638285	19640239	-	overlapStart	86	86	Upstream
chr1	19644664	19644865	202	*	115	38.4	0	3.11	X1.19644764	AT1G52740	19645268	19646482	+	upstream	-604	403	Upstream
chr1	19658546	19658747	202	*	121	53	0	7.88	X1.19658646	AT1G52780	19658643	19662181	+	overlapStart	-97	97	Upstream
chr1	19683684	19683885	202	*	139	95	0	30.64	X1.19683784	AT1G52855	19682946	19683498	-	upstream	-186	186	Upstream
chr1	19711495	19711696	202	*	120	49.6	0	6.71	X1.19711595	AT1G52920	19709275	19711052	-	upstream	-443	443	Upstream
chr1	19747064	19747265	202	*	126	63	0	12.28	X1.19747164	AT1G53000	19745046	19747245	-	overlapStart	181	20	Upstream
chr1	19781174	19781375	202	*	143	106	0	38.08	X1.19781274	AT1G53080	19781368	19782219	+	overlapStart	-194	7	Upstream
chr1	19792368	19792569	202	*	138	93.2	0	29.99	X1.19792468	AT1G53120	19792757	19794778	+	upstream	-389	188	Upstream
chr1	19888181	19888382	202	*	119	47.9	0	5.97	X1.19888281	AT1G53310	19884027	19888369	-	overlapStart	188	13	Upstream
chr1	19954043	19954244	202	*	116	40.4	0	3.68	X1.19954143	AT1G53450	19951006	19954115	-	overlapStart	72	72	Upstream
chr1	19964793	19964994	202	*	137	89.5	0	27.44	X1.19964893	AT1G53480	19963047	19964712	-	upstream	-81	81	Upstream
chr1	19981914	19982115	202	*	151	125	0	52.08	X1.19982014	AT1G53541	19981385	19981495	-	upstream	-419	419	Upstream
chr1	19981914	19982115	202	*	151	125	0	52.08	X1.19982014	AT1G53543	19981969	19982124	+	overlapStart	-55	9	Upstream
chr1	19986431	19986632	202	*	130	74	0	18.05	X1.19986531	AT1G53560	19984742	19985983	-	upstream	-448	448	Upstream
chr1	20051762	20051963	202	*	115	38	0	2.84	X1.20051862	AT1G53708	20052393	20053195	+	upstream	-631	430	Upstream
chr1	20071731	20071932	202	*	114	35	0	2.11	X1.20071831	AT1G53760	20068968	20071096	-	upstream	-635	635	Upstream
chr1	20079446	20079647	202	*	116	38.7	0	3.11	X1.20079546	AT1G53785	20077798	20079002	-	upstream	-444	444	Upstream
chr1	20160676	20160877	202	*	114	36	0	2.34	X1.20160776	AT1G54010	20158664	20160815	-	overlapStart	139	62	Upstream
chr1	20163587	20163788	202	*	175	183	0	101.96	X1.20163687	AT1G54020	20161670	20163748	-	overlapStart	161	40	Upstream
chr1	20180269	20180470	202	*	137	91	0	28.07	X1.20180369	AT1G54050	20179422	20180281	-	overlapStart	12	12	Upstream
chr1	20180269	20180470	202	*	137	91	0	28.07	X1.20180369	AT1G54060	20180679	20182324	+	upstream	-410	209	Upstream
chr1	20187033	20187234	202	*	114	35	0	2.11	X1.20187133	AT1G54080	20183581	20187096	-	overlapStart	63	63	Upstream
chr1	20199584	20199785	202	*	164	156.5	0	78.42	X1.20199684	AT1G54100	20195264	20199130	-	upstream	-454	454	Upstream
chr1	20227012	20227213	202	*	140	97.1	0	32.61	X1.20227112	AT1G54180	20227277	20230237	+	upstream	-265	64	Upstream
chr1	20235060	20235261	202	*	129	72	0	16.97	X1.20235160	AT1G54200	20235712	20237065	+	upstream	-652	451	Upstream
chr1	20246027	20246228	202	*	131	77	0	19.7	X1.20246127	AT1G54217	20243921	20245527	-	upstream	-500	500	Upstream
chr1	20301204	20301405	202	*	121	51.4	0	7.48	X1.20301304	AT1G54380	20297965	20300908	-	upstream	-296	296	Upstream
chr1	20304383	20304584	202	*	140	98	0	32.61	X1.20304483	AT1G54385	20301126	20303885	-	upstream	-498	498	Upstream
chr1	20339824	20340025	202	*	125	62.2	0	12.28	X1.20339924	AT1G54450	20336340	20339535	-	upstream	-289	289	Upstream
chr1	20358285	20358486	202	*	122	55.4	0	9.12	X1.20358385	AT1G54500	20356954	20357788	-	upstream	-497	497	Upstream
chr1	20393636	20393837	202	*	118	44	0	4.6	X1.20393736	AT1G54590	20391560	20393503	-	upstream	-133	133	Upstream
chr1	20596754	20596955	202	*	114	35	0	2.11	X1.20596854	AT1G55207	20595969	20596498	-	upstream	-256	256	Upstream
chr1	20651184	20651385	202	*	127	67	0	14.23	X1.20651284	AT1G55340	20651831	20653648	+	upstream	-647	446	Upstream
chr1	20668674	20668875	202	*	115	37	0	2.59	X1.20668774	AT1G55360	20666222	20668726	-	overlapStart	52	52	Upstream
chr1	20856272	20856473	202	*	115	38	0	2.84	X1.20856372	AT1G55790	20852324	20856122	-	upstream	-150	150	Upstream
chr1	20870471	20870672	202	*	279	434.3	0	999	X1.20870571	AT1G55830	20867872	20870338	-	upstream	-133	133	Upstream
chr1	20876489	20876690	202	*	138	93.3	0	29.99	X1.20876589	AT1G55850	20876699	20879482	+	upstream	-210	9	Upstream
chr1	20902476	20902677	202	*	121	53	0	7.88	X1.20902576	AT1G55900	20903053	20905728	+	upstream	-577	376	Upstream
chr1	20951986	20952187	202	*	136	87	0	25.57	X1.20952086	AT1G56020	20952144	20953547	+	overlapStart	-158	43	Upstream
chr1	20976509	20976710	202	*	127	67	0	14.23	X1.20976609	AT1G56080	20974161	20976291	-	upstream	-218	218	Upstream
chr1	20976509	20976710	202	*	127	67	0	14.23	X1.20976609	AT1G56085	20976515	20977541	+	overlapStart	-6	6	Upstream
chr1	20993277	20993478	202	*	119	48.2	0	6.34	X1.20993377	AT1G56120	20987288	20993072	-	upstream	-205	205	Upstream
chr1	21028276	21028477	202	*	122	55	0	8.7	X1.21028376	AT1G56180	21025904	21028064	-	upstream	-212	212	Upstream
chr1	21030186	21030387	202	*	122	54	0	8.29	X1.21030286	AT1G56200	21030794	21032078	+	upstream	-608	407	Upstream
chr1	21614485	21614686	202	*	114	35.9	0	2.34	X1.21614585	AT1G58270	21612116	21614117	-	upstream	-368	368	Upstream
chr1	21688359	21688560	202	*	203	250	0	169.57	X1.21688459	AT1G58380	21689032	21690256	+	upstream	-673	472	Upstream
chr1	21699555	21699756	202	*	114	34.9	0	2.11	X1.21699655	AT1G58400	21696165	21699118	-	upstream	-437	437	Upstream
chr1	22050820	22051021	202	*	121	52	0	7.48	X1.22050920	AT1G59900	22051295	22053885	+	upstream	-475	274	Upstream
chr1	22072993	22073194	202	*	116	40.1	0	3.68	X1.22073093	AT1G59960	22071292	22073147	-	overlapStart	154	47	Upstream
chr1	22072566	22072767	202	*	192	223.9	0	142.27	X1.22072666	AT1G59970	22073534	22074876	+	upstream	-968	767	Upstream
chr1	22093282	22093483	202	*	172	174.6	0	94.54	X1.22093382	AT1G59990	22090238	22093060	-	upstream	-222	222	Upstream
chr1	22159516	22159717	202	*	183	202	0	120.19	X1.22159616	AT1G60095	22160099	22162419	+	upstream	-583	382	Upstream
chr1	22191429	22191630	202	*	125	61	0	11.34	X1.22191529	AT1G60160	22188114	22191395	-	upstream	-34	34	Upstream
chr1	22242455	22242656	202	*	122	53.4	0	8.29	X1.22242555	AT1G60350	22241273	22242235	-	upstream	-220	220	Upstream
chr1	22275424	22275625	202	*	120	49	0	6.34	X1.22275524	AT1G60460	22275484	22279007	+	overlapStart	-60	60	Upstream
chr1	22363860	22364061	202	*	115	38	0	2.84	X1.22363960	AT1G60750	22362293	22363854	-	upstream	-6	6	Upstream
chr1	22396220	22396421	202	*	223	299.1	0	225.29	X1.22396320	AT1G60830	22395058	22395603	-	upstream	-617	617	Upstream
chr1	22444258	22444459	202	*	118	45.5	0	5.27	X1.22444358	AT1G60950	22444390	22445222	+	overlapStart	-132	69	Upstream
chr1	22461806	22462007	202	*	118	45.7	0	5.27	X1.22461906	AT1G60989	22462160	22462721	+	upstream	-354	153	Upstream
chr1	22486451	22486652	202	*	123	56	0	9.12	X1.22486551	AT1G61050	22486736	22488284	+	upstream	-285	84	Upstream
chr1	22589534	22589735	202	*	116	39	0	3.11	X1.22589634	AT1G61255	22589151	22589691	-	overlapStart	157	44	Upstream
chr1	22658053	22658254	202	*	120	50	0	6.71	X1.22658153	AT1G61400	22654596	22657774	-	upstream	-279	279	Upstream
chr1	22907679	22907880	202	*	114	36	0	2.34	X1.22907779	AT1G61980	22908045	22909588	+	upstream	-366	165	Upstream
chr1	22910568	22910769	202	*	116	40	0	3.39	X1.22910668	AT1G61990	22911205	22912935	+	upstream	-637	436	Upstream
chr1	22943033	22943234	202	*	118	43.8	0	4.6	X1.22943133	AT1G62070	22943594	22944289	+	upstream	-561	360	Upstream
chr1	23050266	23050467	202	*	131	74.9	0	18.59	X1.23050366	AT1G62333	23050445	23050940	+	overlapStart	-179	22	Upstream
chr1	23099432	23099633	202	*	124	60	0	10.88	X1.23099532	AT1G62421	23099484	23099889	+	overlapStart	-52	52	Upstream
chr1	23109758	23109959	202	*	121	53	0	7.88	X1.23109858	AT1G62430	23105941	23109476	-	upstream	-282	282	Upstream
chr1	23128639	23128840	202	*	114	35	0	2.11	X1.23128739	AT1G62480	23128705	23129759	+	overlapStart	-66	66	Upstream
chr1	23172875	23173076	202	*	116	39	0	3.11	X1.23172975	AT1G62580	23173333	23176931	+	upstream	-458	257	Upstream
chr1	23192105	23192306	202	*	115	38.5	0	3.11	X1.23192205	AT1G62640	23192228	23195103	+	overlapStart	-123	78	Upstream
chr1	23206685	23206886	202	*	115	37	0	2.59	X1.23206785	AT1G62670	23204773	23206665	-	upstream	-20	20	Upstream
chr1	23262388	23262589	202	*	125	61.3	0	11.81	X1.23262488	AT1G62810	23257726	23261966	-	upstream	-422	422	Upstream
chr1	23294079	23294280	202	*	118	45.5	0	5.27	X1.23294179	AT1G62886	23294413	23294710	+	upstream	-334	133	Upstream
chr1	23303820	23304021	202	*	152	127	0	53.63	X1.23303920	AT1G62920	23304313	23306374	+	upstream	-493	292	Upstream
chr1	23314771	23314972	202	*	118	44.9	0	4.93	X1.23314871	AT1G62950	23315294	23318234	+	upstream	-523	322	Upstream
chr1	23368324	23368525	202	*	189	217	0	135.14	X1.23368424	AT1G63030	23367407	23368410	-	overlapStart	86	86	Upstream
chr1	23401863	23402064	202	*	329	554.8	0	999	X1.23401963	AT1G63100	23399391	23401367	-	upstream	-496	496	Upstream
chr1	23552026	23552227	202	*	117	43.1	0	4.6	X1.23552126	AT1G63490	23544656	23552030	-	overlapStart	4	4	Upstream
chr1	23586779	23586980	202	*	114	36	0	2.34	X1.23586879	AT1G63630	23587005	23588421	+	upstream	-226	25	Upstream
chr1	23629807	23630008	202	*	219	289	0	212.7	X1.23629907	AT1G63700	23624666	23629112	-	upstream	-695	695	Upstream
chr1	23641287	23641488	202	*	138	94	0	29.99	X1.23641387	AT1G63730	23641770	23645132	+	upstream	-483	282	Upstream
chr1	23712101	23712302	202	*	136	89	0	26.81	X1.23712201	AT1G63870	23707131	23711901	-	upstream	-200	200	Upstream
chr1	23791507	23791708	202	*	199	241	0	159.98	X1.23791607	AT1G64100	23791585	23795563	+	overlapStart	-78	78	Upstream
chr1	23813887	23814088	202	*	142	102.5	0	35.99	X1.23813987	AT1G64160	23814010	23814839	+	overlapStart	-123	78	Upstream
chr1	23942754	23942955	202	*	265	398.7	0	999	X1.23942854	AT1G64450	23941598	23942846	-	overlapStart	92	92	Upstream
chr1	23945027	23945228	202	*	116	41	0	3.68	X1.23945127	AT1G64460	23943499	23944680	-	upstream	-347	347	Upstream
chr1	23968773	23968974	202	*	116	39	0	3.11	X1.23968873	AT1G64550	23968779	23973614	+	overlapStart	-6	6	Upstream
chr1	23986983	23987184	202	*	121	50.9	0	7.09	X1.23987083	AT1G64580	23984790	23986731	-	upstream	-252	252	Upstream
chr1	24035850	24036051	202	*	114	35	0	2.11	X1.24035950	AT1G64680	24036021	24037401	+	overlapStart	-171	30	Upstream
chr1	24037363	24037564	202	*	120	50	0	7.09	X1.24037463	AT1G64690	24038034	24039177	+	upstream	-671	470	Upstream
chr1	24062550	24062751	202	*	127	66	0	13.74	X1.24062650	AT1G64780	24060770	24062630	-	overlapStart	80	80	Upstream
chr1	24084652	24084853	202	*	115	37	0	2.59	X1.24084752	AT1G64800	24085086	24085433	+	upstream	-434	233	Upstream
chr1	24112646	24112847	202	*	114	35.7	0	2.34	X1.24112746	AT1G64900	24113215	24114984	+	upstream	-569	368	Upstream
chr1	24117115	24117316	202	*	165	157.2	0	79.29	X1.24117215	AT1G64910	24115137	24116747	-	upstream	-368	368	Upstream
chr1	24136190	24136391	202	*	126	63.7	0	12.76	X1.24136290	AT1G64970	24134085	24136109	-	upstream	-81	81	Upstream
chr1	24357419	24357620	202	*	136	89	0	26.81	X1.24357519	AT1G65500	24357867	24358616	+	upstream	-448	247	Upstream
chr1	24358998	24359199	202	*	118	44	0	4.6	X1.24359098	AT1G65510	24359453	24360081	+	upstream	-455	254	Upstream
chr1	24365852	24366053	202	*	117	42	0	3.98	X1.24365952	AT1G65540	24362382	24366011	-	overlapStart	159	42	Upstream
chr1	24365852	24366053	202	*	117	42	0	3.98	X1.24365952	AT1G65541	24366310	24366405	+	upstream	-458	257	Upstream
chr1	24417941	24418142	202	*	126	64.7	0	13.24	X1.24418041	AT1G65650	24415015	24417709	-	upstream	-232	232	Upstream
chr1	24518521	24518722	202	*	140	99	0	33.28	X1.24518621	AT1G65900	24515837	24518487	-	upstream	-34	34	Upstream
chr1	24621919	24622120	202	*	205	255	0	174.96	X1.24622019	AT1G66140	24619837	24622004	-	overlapStart	85	85	Upstream
chr1	24692549	24692750	202	*	122	53.3	0	8.29	X1.24692649	AT1G66250	24692894	24695515	+	upstream	-345	144	Upstream
chr1	24699085	24699286	202	*	128	68	0	14.72	X1.24699185	AT1G66260	24695640	24698914	-	upstream	-171	171	Upstream
chr1	24928945	24929146	202	*	115	37	0	2.59	X1.24929045	AT1G66810	24927613	24928803	-	upstream	-142	142	Upstream
chr1	25312872	25313073	202	*	160	147	0	69.86	X1.25312972	AT1G67540	25311242	25312482	-	upstream	-390	390	Upstream
chr1	25429725	25429926	202	*	127	66	0	13.74	X1.25429825	AT1G67820	25429853	25431564	+	overlapStart	-128	73	Upstream
chr1	25434055	25434256	202	*	124	58	0	7.86	X1.25434155	AT1G67840	25434102	25437075	+	overlapStart	-47	47	Upstream
chr1	25442689	25442890	202	*	126	64.9	0	13.24	X1.25442789	AT1G67855	25442256	25442876	-	overlapStart	187	14	Upstream
chr1	25455805	25456006	202	*	116	39	0	3.11	X1.25455905	AT1G67880	25453921	25455735	-	upstream	-70	70	Upstream
chr1	25480884	25481085	202	*	136	87.9	0	26.19	X1.25480984	AT1G67950	25478713	25480580	-	upstream	-304	304	Upstream
chr1	25502269	25502470	202	*	156	137	0	61.58	X1.25502369	AT1G68040	25502876	25505232	+	upstream	-607	406	Upstream
chr1	25558600	25558801	202	*	114	35	0	2.11	X1.25558700	AT1G68190	25559246	25561212	+	upstream	-646	445	Upstream
chr1	25622471	25622672	202	*	133	81.4	0	22.57	X1.25622571	AT1G68360	25621678	25622412	-	upstream	-59	59	Upstream
chr1	25653455	25653656	202	*	176	185.6	0	104.79	X1.25653555	AT1G68410	25649999	25653019	-	upstream	-436	436	Upstream
chr1	25737830	25738031	202	*	124	59	0	10.43	X1.25737930	AT1G68560	25734182	25738002	-	overlapStart	172	29	Upstream
chr1	25917723	25917924	202	*	141	101	0	34.63	X1.25917823	AT1G68930	25918314	25920545	+	upstream	-591	390	Upstream
chr1	25920990	25921191	202	*	212	270.9	0	192.48	X1.25921090	AT1G68935	25921525	25923094	+	upstream	-535	334	Upstream
chr1	25932376	25932577	202	*	116	40	0	3.39	X1.25932476	AT1G68980	25932998	25935030	+	upstream	-622	421	Upstream
chr1	25957348	25957549	202	*	126	64.4	0	13.24	X1.25957448	AT1G69040	25957819	25960307	+	upstream	-471	270	Upstream
chr1	26026502	26026703	202	*	116	40	0	3.39	X1.26026602	AT1G69220	26020089	26026171	-	upstream	-331	331	Upstream
chr1	26061385	26061586	202	*	115	37.4	0	2.84	X1.26061485	AT1G69320	26061862	26062514	+	upstream	-477	276	Upstream
chr1	26069401	26069602	202	*	284	446	0	999	X1.26069501	AT1G69350	26069882	26072245	+	upstream	-481	280	Upstream
chr1	26088579	26088780	202	*	143	106	0	38.08	X1.26088679	AT1G69410	26089202	26090386	+	upstream	-623	422	Upstream
chr1	26117773	26117974	202	*	145	110	0	40.91	X1.26117873	AT1G69480	26114112	26117797	-	overlapStart	24	24	Upstream
chr1	26119887	26120088	202	*	138	94	0	29.99	X1.26119987	AT1G69485	26118229	26119576	-	upstream	-311	311	Upstream
chr1	26177529	26177730	202	*	181	196.1	0	115.31	X1.26177629	AT1G69588	26178042	26178925	+	upstream	-513	312	Upstream
chr1	26402909	26403110	202	*	131	75.9	0	19.14	X1.26403009	AT1G70100	26403083	26406119	+	overlapStart	-174	27	Upstream
chr1	26468590	26468791	202	*	116	40	0	3.39	X1.26468690	AT1G70280	26465893	26468706	-	overlapStart	116	85	Upstream
chr1	26506717	26506918	202	*	114	34.9	0	2.11	X1.26506817	AT1G70340	26503961	26506613	-	upstream	-104	104	Upstream
chr1	26515623	26515824	202	*	115	37	0	2.59	X1.26515723	AT1G70370	26512681	26515188	-	upstream	-435	435	Upstream
chr1	26626051	26626252	202	*	115	36.8	0	2.59	X1.26626151	AT1G70620	26626555	26631104	+	upstream	-504	303	Upstream
chr1	26716680	26716881	202	*	128	70	0	15.92	X1.26716780	AT1G70850	26714866	26716829	-	overlapStart	149	52	Upstream
chr1	26721516	26721717	202	*	124	58.8	0	10.43	X1.26721616	AT1G70870	26721020	26721563	-	overlapStart	47	47	Upstream
chr1	26733562	26733763	202	*	142	102.1	0	35.99	X1.26733662	AT1G70910	26734155	26734640	+	upstream	-593	392	Upstream
chr1	26742976	26743177	202	*	114	35.2	0	2.34	X1.26743076	AT1G70940	26743054	26746395	+	overlapStart	-78	78	Upstream
chr1	26765204	26765405	202	*	123	56	0	9.12	X1.26765304	AT1G70985	26764672	26765285	-	overlapStart	81	81	Upstream
chr1	26810001	26810202	202	*	475	905.9	0	999	X1.26810101	AT1G71070	26807188	26809504	-	upstream	-497	497	Upstream
chr1	26826537	26826738	202	*	117	42	0	3.98	X1.26826637	AT1G71150	26827146	26828674	+	upstream	-609	408	Upstream
chr1	26872584	26872785	202	*	118	43.7	0	4.6	X1.26872684	AT1G71280	26870141	26872152	-	upstream	-432	432	Upstream
chr1	26872584	26872785	202	*	118	43.7	0	4.6	X1.26872684	AT1G71290	26872643	26873242	+	overlapStart	-59	59	Upstream
chr1	27291455	27291656	202	*	131	77	0	19.7	X1.27291555	AT1G72490	27288900	27291042	-	upstream	-413	413	Upstream
chr1	27360756	27360957	202	*	117	41.5	0	3.98	X1.27360856	AT1G72690	27361154	27361919	+	upstream	-398	197	Upstream
chr1	27377484	27377685	202	*	131	75.9	0	19.14	X1.27377584	AT1G72720	27376755	27377395	-	upstream	-89	89	Upstream
chr1	27400248	27400449	202	*	177	188	0	106.68	X1.27400348	AT1G72810	27398591	27400417	-	overlapStart	169	32	Upstream
chr1	27441182	27441383	202	*	114	34.1	0	2.11	X1.27441282	AT1G72940	27442238	27443856	+	upstream	-1056	855	Upstream
chr1	27565511	27565712	202	*	120	50	0	6.71	X1.27565611	AT1G73310	27562815	27565177	-	upstream	-334	334	Upstream
chr1	27690669	27690870	202	*	149	120	0	48.26	X1.27690769	AT1G73650	27688123	27690307	-	upstream	-362	362	Upstream
chr1	27720107	27720308	202	*	118	44	0	4.6	X1.27720207	AT1G73700	27717380	27719648	-	upstream	-459	459	Upstream
chr1	27724605	27724806	202	*	157	138	0	58.31	X1.27724705	AT1G73720	27725002	27729931	+	upstream	-397	196	Upstream
chr1	27733708	27733909	202	*	118	44	0	4.6	X1.27733808	AT1G73740	27734279	27736189	+	upstream	-571	370	Upstream
chr1	27741293	27741494	202	*	120	50.5	0	7.09	X1.27741393	AT1G73760	27739168	27741207	-	upstream	-86	86	Upstream
chr1	27896603	27896804	202	*	271	413	0	999	X1.27896703	AT1G74170	27891494	27896355	-	upstream	-248	248	Upstream
chr1	27919927	27920128	202	*	144	107	0	38.78	X1.27920027	AT1G74250	27920328	27922414	+	upstream	-401	200	Upstream
chr1	27935234	27935435	202	*	114	34.7	0	2.11	X1.27935334	AT1G74300	27935298	27936608	+	overlapStart	-64	64	Upstream
chr1	27969793	27969994	202	*	133	81.5	0	22.57	X1.27969893	AT1G74420	27967771	27969879	-	overlapStart	86	86	Upstream
chr1	27986612	27986813	202	*	119	46	0	5.27	X1.27986712	AT1G74458	27986957	27987675	+	upstream	-345	144	Upstream
chr1	28032136	28032337	202	*	120	49	0	6.71	X1.28032236	AT1G74640	28032763	28034773	+	upstream	-627	426	Upstream
chr1	28053236	28053437	202	*	176	183.6	0	102.9	X1.28053336	AT1G74670	28053286	28054149	+	overlapStart	-50	50	Upstream
chr1	28086760	28086961	202	*	119	47	0	5.62	X1.28086860	AT1G74750	28086800	28089367	+	overlapStart	-40	40	Upstream
chr1	28139124	28139325	202	*	120	49	0	6.34	X1.28139224	AT1G74910	28135361	28138826	-	upstream	-298	298	Upstream
chr1	28143973	28144174	202	*	133	80	0	21.41	X1.28144073	AT1G74929	28143997	28144098	-	includeFeature	125	24	Upstream
chr1	28156667	28156868	202	*	115	38	0	2.84	X1.28156767	AT1G74960	28151924	28156259	-	upstream	-408	408	Upstream
chr1	28177381	28177582	202	*	115	38	0	2.84	X1.28177481	AT1G75040	28177703	28178940	+	upstream	-322	121	Upstream
chr1	28179892	28180093	202	*	117	43.2	0	4.6	X1.28179992	AT1G75050	28180116	28181062	+	upstream	-224	23	Upstream
chr1	28240969	28241170	202	*	116	39	0	3.11	X1.28241069	AT1G75240	28241072	28242756	+	overlapStart	-103	98	Upstream
chr1	28251586	28251787	202	*	119	48	0	5.97	X1.28251686	AT1G75270	28250075	28251350	-	upstream	-236	236	Upstream
chr1	28251586	28251787	202	*	119	48	0	5.97	X1.28251686	AT1G75280	28251960	28253619	+	upstream	-374	173	Upstream
chr1	28274401	28274602	202	*	130	73	0	17.51	X1.28274501	AT1G75360	28274588	28275990	+	overlapStart	-187	14	Upstream
chr1	28353412	28353613	202	*	116	39.6	0	3.39	X1.28353512	AT1G75520	28351562	28353495	-	overlapStart	83	83	Upstream
chr1	28417148	28417349	202	*	181	196	0	114.34	X1.28417248	AT1G75670	28415203	28416852	-	upstream	-296	296	Upstream
chr1	28419533	28419734	202	*	138	92.8	0	29.34	X1.28419633	AT1G75680	28417052	28419529	-	upstream	-4	4	Upstream
chr1	28448962	28449163	202	*	122	55	0	8.7	X1.28449062	AT1G75760	28446632	28448646	-	upstream	-316	316	Upstream
chr1	28460929	28461130	202	*	116	38.7	0	3.11	X1.28461029	AT1G75810	28461664	28462366	+	upstream	-735	534	Upstream
chr1	28467093	28467294	202	*	213	273	0	194.71	X1.28467193	AT1G75820	28463462	28466971	-	upstream	-122	122	Upstream
chr1	28498722	28498923	202	*	141	99.4	0	33.95	X1.28498822	AT1G75900	28499060	28501138	+	upstream	-338	137	Upstream
chr1	28500317	28500518	202	*	119	46.6	0	5.62	X1.28500417	AT1G75910	28501434	28503283	+	upstream	-1117	916	Upstream
chr1	28617089	28617290	202	*	130	74	0	18.05	X1.28617189	AT1G76270	28613207	28616739	-	upstream	-350	350	Upstream
chr1	28623095	28623296	202	*	170	170.4	0	90.88	X1.28623195	AT1G76280	28617639	28622731	-	upstream	-364	364	Upstream
chr1	28637134	28637335	202	*	124	59.6	0	10.88	X1.28637234	AT1G76340	28634955	28636716	-	upstream	-418	418	Upstream
chr1	28654821	28655022	202	*	115	36.6	0	2.59	X1.28654921	AT1G76380	28651154	28654580	-	upstream	-241	241	Upstream
chr1	28654821	28655022	202	*	115	36.6	0	2.59	X1.28654921	AT1G76390	28655390	28658711	+	upstream	-569	368	Upstream
chr1	28717614	28717815	202	*	121	53.1	0	8.29	X1.28717714	AT1G76530	28718213	28720371	+	upstream	-599	398	Upstream
chr1	28810862	28811063	202	*	197	235.4	0	154.72	X1.28810962	AT1G76750	28811040	28811721	+	overlapStart	-178	23	Upstream
chr1	28828699	28828900	202	*	115	37	0	2.59	X1.28828799	AT1G76800	28829308	28830277	+	upstream	-609	408	Upstream
chr1	28947018	28947219	202	*	118	45	0	4.93	X1.28947118	AT1G77020	28944843	28947031	-	overlapStart	13	13	Upstream
chr1	28970117	28970318	202	*	119	48	0	5.97	X1.28970217	AT1G77110	28970802	28974603	+	upstream	-685	484	Upstream
chr1	29005090	29005291	202	*	156	137	0	61.58	X1.29005190	AT1G77200	29004357	29005091	-	overlapStart	1	1	Upstream
chr1	29023723	29023924	202	*	115	38	0	2.84	X1.29023823	AT1G77250	29020265	29023474	-	upstream	-249	249	Upstream
chr1	29077308	29077509	202	*	143	106	0	38.08	X1.29077408	AT1G77380	29074888	29077390	-	overlapStart	82	82	Upstream
chr1	29095525	29095726	202	*	114	35.7	0	2.34	X1.29095625	AT1G77440	29096020	29098450	+	upstream	-495	294	Upstream
chr1	29162805	29163006	202	*	206	256	0	176.04	X1.29162905	AT1G77600	29152748	29162448	-	upstream	-357	357	Upstream
chr1	29191269	29191470	202	*	118	43.6	0	4.6	X1.29191369	AT1G77670	29188901	29190975	-	upstream	-294	294	Upstream
chr1	29203429	29203630	202	*	117	43.3	0	4.6	X1.29203529	AT1G77690	29200941	29203340	-	upstream	-89	89	Upstream
chr1	29363946	29364147	202	*	118	43.8	0	4.6	X1.29364046	AT1G78080	29364249	29366073	+	upstream	-303	102	Upstream
chr1	29415141	29415342	202	*	120	50	0	6.71	X1.29415241	AT1G78172	29415530	29415921	+	upstream	-389	188	Upstream
chr1	29452224	29452425	202	*	122	55.1	0	9.12	X1.29452324	AT1G78270	29450563	29452417	-	overlapStart	193	8	Upstream
chr1	29452171	29452372	202	*	137	89.9	0	27.43	X1.29452271	AT1G78280	29452555	29457373	+	upstream	-384	183	Upstream
chr1	29474114	29474315	202	*	145	109.2	0	40.91	X1.29474214	AT1G78340	29472892	29473863	-	upstream	-251	251	Upstream
chr1	29485198	29485399	202	*	126	64.9	0	13.24	X1.29485298	AT1G78370	29484269	29485290	-	overlapStart	92	92	Upstream
chr1	29561350	29561551	202	*	120	49.3	0	6.71	X1.29561450	AT1G78580	29552340	29560912	-	upstream	-438	438	Upstream
chr1	29585089	29585290	202	*	138	94	0	29.99	X1.29585189	AT1G78660	29585677	29588302	+	upstream	-588	387	Upstream
chr1	29616923	29617124	202	*	158	141	0	64.85	X1.29617023	AT1G78760	29615174	29616738	-	upstream	-185	185	Upstream
chr1	29635709	29635910	202	*	118	45	0	4.93	X1.29635809	AT1G78820	29634124	29635813	-	overlapStart	104	97	Upstream
chr1	29647452	29647653	202	*	136	87	0	25.57	X1.29647552	AT1G78860	29646168	29647499	-	overlapStart	47	47	Upstream
chr1	29715970	29716171	202	*	169	167.9	0	88.17	X1.29716070	AT1G78995	29715079	29716111	-	overlapStart	141	60	Upstream
chr1	29833302	29833503	202	*	115	37	0	2.59	X1.29833402	AT1G79280	29819142	29833016	-	upstream	-286	286	Upstream
chr1	29833302	29833503	202	*	115	37	0	2.59	X1.29833402	AT1G79310	29833921	29835545	+	upstream	-619	418	Upstream
chr1	29923151	29923352	202	*	140	98.4	0	33.28	X1.29923251	AT1G79540	29920083	29922676	-	upstream	-475	475	Upstream
chr1	30007093	30007294	202	*	136	87	0	25.57	X1.30007193	AT1G79740	30004367	30007020	-	upstream	-73	73	Upstream
chr1	30048741	30048942	202	*	188	213	0	131.11	X1.30048841	AT1G79880	30046028	30048378	-	upstream	-363	363	Upstream
chr1	30048163	30048364	202	*	118	45	0	4.93	X1.30048263	AT1G79890	30048655	30052203	+	upstream	-492	291	Upstream
chr1	30138689	30138890	202	*	116	38.7	0	3.11	X1.30138789	AT1G80120	30139101	30140204	+	upstream	-412	211	Upstream
chr1	30166020	30166221	202	*	124	59.6	0	10.88	X1.30166120	AT1G80210	30162835	30165755	-	upstream	-265	265	Upstream
chr1	30175717	30175918	202	*	128	67.8	0	14.72	X1.30175817	AT1G80260	30175785	30180681	+	overlapStart	-68	68	Upstream
chr1	30187944	30188145	202	*	115	37	0	2.59	X1.30188044	AT1G80290	30188321	30189726	+	upstream	-377	176	Upstream
chr1	30194444	30194645	202	*	116	38.7	0	3.11	X1.30194544	AT1G80310	30194618	30196554	+	overlapStart	-174	27	Upstream
chr1	30195717	30195918	202	*	148	118	0	46.76	X1.30195817	AT1G80320	30196782	30197896	+	upstream	-1065	864	Upstream
chr1	30202178	30202379	202	*	248	359	0	295.71	X1.30202278	AT1G80340	30200693	30202200	-	overlapStart	22	22	Upstream
chr1	30222824	30223025	202	*	153	130	0	55.98	X1.30222924	AT1G80390	30221780	30222702	-	upstream	-122	122	Upstream
chr1	30241054	30241255	202	*	116	39	0	3.11	X1.30241154	AT1G80440	30241607	30243071	+	upstream	-553	352	Upstream
chr1	30305132	30305333	202	*	114	35.5	0	2.34	X1.30305232	AT1G80620	30305362	30307417	+	upstream	-230	29	Upstream
chr1	30310850	30311051	202	*	115	37	0	2.59	X1.30310950	AT1G80630	30308696	30310656	-	upstream	-194	194	Upstream
chr1	30340181	30340382	202	*	115	38.4	0	3.11	X1.30340281	AT1G80730	30339323	30340247	-	overlapStart	66	66	Upstream
chr1	30357630	30357831	202	*	197	235	0	153.67	X1.30357730	AT1G80780	30358115	30359606	+	upstream	-485	284	Upstream
chr1	30404965	30405166	202	*	133	80	0	21.41	X1.30405065	AT1G80920	30403644	30404690	-	upstream	-275	275	Upstream
chr2	9873	10074	202	*	898	1927.6	0	999	X2.9973	AT2G01023	9648	9767	-	upstream	-106	106	Upstream
chr2	85286	85487	202	*	144	107	0	28.13	X2.85386	AT2G01110	83260	85229	-	upstream	-57	57	Upstream
chr2	85286	85487	202	*	144	107	0	28.13	X2.85386	AT2G01120	85401	88186	+	overlapStart	-115	86	Upstream
chr2	94623	94824	202	*	115	37.8	0	3.21	X2.94723	AT2G01130	88559	94660	-	overlapStart	37	37	Upstream
chr2	122483	122684	202	*	329	554.7	0	999	X2.122583	AT2G01210	119441	121846	-	upstream	-637	637	Upstream
chr2	167774	167975	202	*	122	53.5	0	8.97	X2.167874	AT2G01350	165141	167259	-	upstream	-515	515	Upstream
chr2	167676	167877	202	*	115	37.2	0	3.21	X2.167776	AT2G01360	167997	168479	+	upstream	-321	120	Upstream
chr2	332845	333046	202	*	132	79.3	0	22.62	X2.332945	AT2G01755	332194	332781	-	upstream	-64	64	Upstream
chr2	332845	333046	202	*	132	79.3	0	22.62	X2.332945	AT2G01760	332967	334696	+	overlapStart	-122	79	Upstream
chr2	416545	416746	202	*	220	292	0	221.71	X2.416645	AT2G01910	416911	420588	+	upstream	-366	165	Upstream
chr2	431591	431792	202	*	129	71	0	17.47	X2.431691	AT2G01940	432275	435077	+	upstream	-684	483	Upstream
chr2	528238	528439	202	*	124	59.3	0	11.69	X2.528338	AT2G02100	528350	529108	+	overlapStart	-112	89	Upstream
chr2	738056	738257	202	*	203	249	0	173.2	X2.738156	AT2G02660	738504	739769	+	upstream	-448	247	Upstream
chr2	847022	847223	202	*	180	193.7	0	115.98	X2.847122	AT2G02890	843913	846616	-	upstream	-406	406	Upstream
chr2	936765	936966	202	*	118	43.5	0	5.09	X2.936865	AT2G03120	937420	940339	+	upstream	-655	454	Upstream
chr2	968088	968289	202	*	120	49.2	0	7.32	X2.968188	AT2G03200	966451	967918	-	upstream	-170	170	Upstream
chr2	977316	977517	202	*	123	56.3	0	10.3	X2.977416	AT2G03240	973413	977337	-	overlapStart	21	21	Upstream
chr2	1021042	1021243	202	*	119	47	0	6.16	X2.1021142	AT2G03350	1019579	1021186	-	overlapStart	144	57	Upstream
chr2	1040712	1040913	202	*	125	62.7	0	13.15	X2.1040812	AT2G03450	1041388	1043667	+	upstream	-676	475	Upstream
chr2	1081132	1081333	202	*	120	50	0	7.32	X2.1081232	AT2G03565	1081592	1082003	+	upstream	-460	259	Upstream
chr2	1094393	1094594	202	*	118	44	0	5.09	X2.1094493	AT2G03590	1094757	1096968	+	upstream	-364	163	Upstream
chr2	1273740	1273941	202	*	130	73	0	18.58	X2.1273840	AT2G04020	1274427	1275524	+	upstream	-687	486	Upstream
chr2	1527148	1527349	202	*	114	35	0	2.41	X2.1527248	AT2G04378	1525331	1526875	-	upstream	-273	273	Upstream
chr2	1592743	1592944	202	*	215	279	0	206.73	X2.1592843	AT2G04560	1590306	1592667	-	upstream	-76	76	Upstream
chr2	1625142	1625343	202	*	153	128.3	0	57.42	X2.1625242	AT2G04650	1621788	1624593	-	upstream	-549	549	Upstream
chr2	1687874	1688075	202	*	169	167	0	90.28	X2.1687974	AT2G04800	1687196	1687817	-	upstream	-57	57	Upstream
chr2	1874986	1875187	202	*	215	279.2	0	207.87	X2.1875086	AT2G05180	1875390	1876794	+	upstream	-404	203	Upstream
chr2	1974559	1974760	202	*	131	75.7	0	20.27	X2.1974659	AT2G05400	1974886	1976570	+	upstream	-327	126	Upstream
chr2	1983613	1983814	202	*	117	42	0	4.42	X2.1983713	AT2G05420	1983901	1985341	+	upstream	-288	87	Upstream
chr2	1992989	1993190	202	*	115	38.2	0	3.5	X2.1993089	AT2G05440	1993082	1994166	+	overlapStart	-93	93	Upstream
chr2	2029514	2029715	202	*	225	303	0	234.57	X2.2029614	AT2G05530	2029712	2030544	+	overlapStart	-198	3	Upstream
chr2	2272148	2272349	202	*	121	51.8	0	8.13	X2.2272248	AT2G05920	2269515	2272229	-	overlapStart	81	81	Upstream
chr2	2347726	2347927	202	*	117	42.2	0	4.75	X2.2347826	AT2G06025	2348136	2352157	+	upstream	-410	209	Upstream
chr2	3514695	3514896	202	*	225	302.8	0	234.57	X2.3514795	AT2G07680	3514745	3522491	+	overlapStart	-50	50	Upstream
chr2	4312142	4312343	202	*	115	37.8	0	3.21	X2.4312242	AT2G10940	4310412	4312103	-	upstream	-39	39	Upstream
chr2	5692955	5693156	202	*	114	36	0	2.66	X2.5693055	AT2G13660	5692097	5693016	-	overlapStart	61	61	Upstream
chr2	5916245	5916446	202	*	137	91.7	0	30.16	X2.5916345	AT2G14060	5914445	5915767	-	upstream	-478	478	Upstream
chr2	6542116	6542317	202	*	124	60	0	11.69	X2.6542216	AT2G15090	6542256	6543947	+	overlapStart	-140	61	Upstream
chr2	6608256	6608457	202	*	144	108	0	41.28	X2.6608356	AT2G15220	6608659	6609506	+	upstream	-403	202	Upstream
chr2	6619248	6619449	202	*	114	35	0	2.41	X2.6619348	AT2G15240	6615525	6618974	-	upstream	-274	274	Upstream
chr2	6639637	6639838	202	*	141	100.7	0	36.28	X2.6639737	AT2G15280	6640154	6642350	+	upstream	-517	316	Upstream
chr2	6805884	6806085	202	*	114	36	0	2.66	X2.6805984	AT2G15610	6806033	6806764	+	overlapStart	-149	52	Upstream
chr2	7165500	7165701	202	*	125	61.7	0	12.66	X2.7165600	AT2G16530	7162976	7165323	-	upstream	-177	177	Upstream
chr2	7218400	7218601	202	*	122	55	0	9.41	X2.7218500	AT2G16650	7215819	7218395	-	upstream	-5	5	Upstream
chr2	7301565	7301766	202	*	122	53.1	0	8.97	X2.7301665	AT2G16850	7301581	7303437	+	overlapStart	-16	16	Upstream
chr2	7316407	7316608	202	*	116	41	0	4.1	X2.7316507	AT2G16890	7316889	7319181	+	upstream	-482	281	Upstream
chr2	7495842	7496043	202	*	128	68	0	15.86	X2.7495942	AT2G17230	7494536	7496016	-	overlapStart	174	27	Upstream
chr2	7497617	7497818	202	*	128	68	0	15.86	X2.7497717	AT2G17240	7498130	7499206	+	upstream	-513	312	Upstream
chr2	7508363	7508564	202	*	114	35	0	2.41	X2.7508463	AT2G17265	7508588	7509755	+	upstream	-225	24	Upstream
chr2	7509817	7510018	202	*	146	111.4	0	44.22	X2.7509917	AT2G17270	7510100	7512387	+	upstream	-283	82	Upstream
chr2	7567733	7567934	202	*	118	44	0	5.09	X2.7567833	AT2G17430	7568018	7570840	+	upstream	-285	84	Upstream
chr2	7576207	7576408	202	*	122	53.7	0	8.97	X2.7576307	AT2G17442	7573835	7575939	-	upstream	-268	268	Upstream
chr2	7665729	7665930	202	*	140	98.3	0	34.89	X2.7665829	AT2G17630	7666585	7668065	+	upstream	-856	655	Upstream
chr2	7825917	7826118	202	*	144	107.6	0	41.28	X2.7826017	AT2G17990	7826817	7828754	+	upstream	-900	699	Upstream
chr2	7936784	7936985	202	*	162	150.3	0	75.93	X2.7936884	AT2G18245	7937282	7939600	+	upstream	-498	297	Upstream
chr2	7972386	7972587	202	*	115	37.1	0	3.21	X2.7972486	AT2G18350	7971017	7972081	-	upstream	-305	305	Upstream
chr2	8039171	8039372	202	*	126	65	0	14.17	X2.8039271	AT2G18530	8039670	8040780	+	upstream	-499	298	Upstream
chr2	8133698	8133899	202	*	125	62.4	0	13.15	X2.8133798	AT2G18770	8134639	8136560	+	upstream	-941	740	Upstream
chr2	8194185	8194386	202	*	161	147.8	0	73.32	X2.8194285	AT2G18910	8192708	8194338	-	overlapStart	153	48	Upstream
chr2	8440408	8440609	202	*	141	100.8	0	36.28	X2.8440508	AT2G19490	8441527	8444170	+	upstream	-1119	918	Upstream
chr2	8483346	8483547	202	*	124	60	0	11.69	X2.8483446	AT2G19610	8483940	8486086	+	upstream	-594	393	Upstream
chr2	8550107	8550308	202	*	114	35	0	2.41	X2.8550207	AT2G19810	8550313	8551858	+	upstream	-206	5	Upstream
chr2	8568358	8568559	202	*	140	99	0	34.88	X2.8568458	AT2G19850	8568569	8569890	+	upstream	-211	10	Upstream
chr2	8785463	8785664	202	*	120	49	0	6.92	X2.8785563	AT2G20360	8785988	8789473	+	upstream	-525	324	Upstream
chr2	8864303	8864504	202	*	122	53.9	0	8.97	X2.8864403	AT2G20585	8865098	8866769	+	upstream	-795	594	Upstream
chr2	8920196	8920397	202	*	114	34	0	2.17	X2.8920296	AT2G20680	8920467	8923173	+	upstream	-271	70	Upstream
chr2	8945563	8945764	202	*	198	238	0	161.29	X2.8945663	AT2G20760	8942763	8945244	-	upstream	-319	319	Upstream
chr2	8971660	8971861	202	*	141	100.9	0	36.28	X2.8971760	AT2G20835	8970886	8971303	-	upstream	-357	357	Upstream
chr2	9084681	9084882	202	*	261	389	0	999	X2.9084781	AT2G21200	9083906	9084375	-	upstream	-306	306	Upstream
chr2	9101427	9101628	202	*	121	53	0	8.55	X2.9101527	AT2G21237	9100536	9101215	-	upstream	-212	212	Upstream
chr2	9105006	9105207	202	*	114	36.2	0	2.93	X2.9105106	AT2G21250	9103181	9105187	-	overlapStart	181	20	Upstream
chr2	9112189	9112390	202	*	126	64.6	0	14.17	X2.9112289	AT2G21290	9112856	9113330	+	upstream	-667	466	Upstream
chr2	9266251	9266452	202	*	119	47.5	0	6.54	X2.9266351	AT2G21660	9265249	9266393	-	overlapStart	142	59	Upstream
chr2	9340899	9341100	202	*	134	83	0	24.43	X2.9340999	AT2G21910	9341498	9343030	+	upstream	-599	398	Upstream
chr2	9360947	9361148	202	*	116	39	0	3.49	X2.9361047	AT2G21990	9359356	9360664	-	upstream	-283	283	Upstream
chr2	9449925	9450126	202	*	133	80	0	22.62	X2.9450025	AT2G22230	9449984	9451622	+	overlapStart	-59	59	Upstream
chr2	9463272	9463473	202	*	146	112	0	44.22	X2.9463372	AT2G22270	9463694	9465467	+	upstream	-422	221	Upstream
chr2	9514561	9514762	202	*	117	41.6	0	4.42	X2.9514661	AT2G22425	9514936	9515535	+	upstream	-375	174	Upstream
chr2	9516610	9516811	202	*	138	93	0	30.82	X2.9516710	AT2G22426	9517017	9517229	+	upstream	-407	206	Upstream
chr2	9636236	9636437	202	*	136	87.9	0	27.57	X2.9636336	AT2G22670	9636380	9638745	+	overlapStart	-144	57	Upstream
chr2	9748163	9748364	202	*	230	315	0	248.81	X2.9748263	AT2G22905	9748771	9749542	+	upstream	-608	407	Upstream
chr2	9753389	9753590	202	*	139	96	0	32.83	X2.9753489	AT2G22920	9753631	9757600	+	upstream	-242	41	Upstream
chr2	9844254	9844455	202	*	115	38	0	3.21	X2.9844354	AT2G23130	9844299	9845385	+	overlapStart	-45	45	Upstream
chr2	9876801	9877002	202	*	134	83.6	0	25.05	X2.9876901	AT2G23190	9877058	9879007	+	upstream	-257	56	Upstream
chr2	9879043	9879244	202	*	114	36	0	2.66	X2.9879143	AT2G23200	9879276	9881908	+	upstream	-233	32	Upstream
chr2	9942639	9942840	202	*	120	49.5	0	7.32	X2.9942739	AT2G23348	9941189	9942814	-	overlapStart	175	26	Upstream
chr2	9942639	9942840	202	*	120	49.5	0	7.32	X2.9942739	AT2G23350	9943053	9946269	+	upstream	-414	213	Upstream
chr2	10028954	10029155	202	*	122	55.1	0	9.85	X2.10029054	AT2G23550	10027586	10028777	-	upstream	-177	177	Upstream
chr2	10030622	10030823	202	*	156	136	0	63.15	X2.10030722	AT2G23560	10029275	10030382	-	upstream	-240	240	Upstream
chr2	10055287	10055488	202	*	117	41.8	0	4.42	X2.10055387	AT2G23630	10052566	10055317	-	overlapStart	30	30	Upstream
chr2	10056931	10057132	202	*	116	41	0	4.1	X2.10057031	AT2G23640	10057554	10059108	+	upstream	-623	422	Upstream
chr2	10065595	10065796	202	*	116	40	0	3.79	X2.10065695	AT2G23680	10066163	10067455	+	upstream	-568	367	Upstream
chr2	10186483	10186684	202	*	139	94.6	0	32.16	X2.10186583	AT2G23945	10185229	10186605	-	overlapStart	122	79	Upstream
chr2	10214697	10214898	202	*	114	35.3	0	2.67	X2.10214797	AT2G24010	10214714	10217542	+	overlapStart	-17	17	Upstream
chr2	10293704	10293905	202	*	179	191.4	0	114.02	X2.10293804	AT2G24210	10294330	10297530	+	upstream	-626	425	Upstream
chr2	10315362	10315563	202	*	205	254.4	0	179.79	X2.10315462	AT2G24250	10313286	10314920	-	upstream	-442	442	Upstream
chr2	10338584	10338785	202	*	125	61	0	12.17	X2.10338684	AT2G24290	10338679	10340121	+	overlapStart	-95	95	Upstream
chr2	10344238	10344439	202	*	188	214	0	136.1	X2.10344338	AT2G24310	10344358	10345510	+	overlapStart	-120	81	Upstream
chr2	10375310	10375511	202	*	121	52.3	0	8.55	X2.10375410	AT2G24395	10375470	10376265	+	overlapStart	-160	41	Upstream
chr2	10498738	10498939	202	*	133	81.3	0	16.54	X2.10498838	AT2G24681	10497147	10498331	-	upstream	-407	407	Upstream
chr2	10617151	10617352	202	*	126	65.1	0	14.67	X2.10617251	AT2G24960	10617263	10620034	+	overlapStart	-112	89	Upstream
chr2	10629590	10629791	202	*	117	42	0	4.42	X2.10629690	AT2G25000	10629737	10631413	+	overlapStart	-147	54	Upstream
chr2	10662237	10662438	202	*	141	101.3	0	36.98	X2.10662337	AT2G25060	10662241	10663103	+	overlapStart	-4	4	Upstream
chr2	10697291	10697492	202	*	119	47	0	6.16	X2.10697391	AT2G25130	10695182	10697000	-	upstream	-291	291	Upstream
chr2	10759658	10759859	202	*	160	147	0	72.45	X2.10759758	AT2G25270	10759724	10762568	+	overlapStart	-66	66	Upstream
chr2	10816680	10816881	202	*	126	65	0	14.17	X2.10816780	AT2G25420	10816749	10821053	+	overlapStart	-69	69	Upstream
chr2	10872148	10872349	202	*	116	40	0	3.79	X2.10872248	AT2G25540	10866822	10872077	-	upstream	-71	71	Upstream
chr2	10902681	10902882	202	*	133	82	0	23.82	X2.10902781	AT2G25610	10901291	10902531	-	upstream	-150	150	Upstream
chr2	10975931	10976132	202	*	140	97	0	33.51	X2.10976031	AT2G25735	10975060	10975759	-	upstream	-172	172	Upstream
chr2	11087214	11087415	202	*	121	52.4	0	8.55	X2.11087314	AT2G26010	11087348	11087944	+	overlapStart	-134	67	Upstream
chr2	11173167	11173368	202	*	117	42	0	4.42	X2.11173267	AT2G26250	11170418	11173142	-	upstream	-25	25	Upstream
chr2	11183730	11183931	202	*	116	40.3	0	4.1	X2.11183830	AT2G26267	11184213	11184419	+	upstream	-483	282	Upstream
chr2	11250531	11250732	202	*	170	169.7	0	93.05	X2.11250631	AT2G26450	11251120	11253612	+	upstream	-589	388	Upstream
chr2	11279704	11279905	202	*	116	41	0	4.1	X2.11279804	AT2G26520	11280025	11280940	+	upstream	-321	120	Upstream
chr2	11293272	11293473	202	*	147	114	0	45.72	X2.11293372	AT2G26550	11291218	11293445	-	overlapStart	173	28	Upstream
chr2	11432731	11432932	202	*	114	35	0	2.41	X2.11432831	AT2G26800	11429022	11432732	-	overlapStart	1	1	Upstream
chr2	11494655	11494856	202	*	114	34	0	2.17	X2.11494755	AT2G26930	11491707	11494266	-	upstream	-389	389	Upstream
chr2	11519194	11519395	202	*	153	129	0	57.42	X2.11519294	AT2G26980	11514703	11518734	-	upstream	-460	460	Upstream
chr2	11527977	11528178	202	*	116	39.7	0	3.79	X2.11528077	AT2G27010	11526168	11527854	-	upstream	-123	123	Upstream
chr2	11659546	11659747	202	*	117	43	0	4.75	X2.11659646	AT2G27240	11659579	11662408	+	overlapStart	-33	33	Upstream
chr2	11665573	11665774	202	*	149	119	0	49.53	X2.11665673	AT2G27250	11664986	11665769	-	overlapStart	196	5	Upstream
chr2	11696946	11697147	202	*	116	39	0	3.49	X2.11697046	AT2G27330	11695032	11696630	-	upstream	-316	316	Upstream
chr2	11713368	11713569	202	*	163	154	0	78.56	X2.11713468	AT2G27380	11713411	11715696	+	overlapStart	-43	43	Upstream
chr2	11727561	11727762	202	*	119	47.8	0	6.54	X2.11727661	AT2G27420	11726144	11727614	-	overlapStart	53	53	Upstream
chr2	11852064	11852265	202	*	132	79	0	22.02	X2.11852164	AT2G27810	11852080	11856291	+	overlapStart	-16	16	Upstream
chr2	11870978	11871179	202	*	127	65.7	0	14.67	X2.11871078	AT2G27880	11871488	11876894	+	upstream	-510	309	Upstream
chr2	11889597	11889798	202	*	145	109.9	0	42.74	X2.11889697	AT2G27920	11885571	11889176	-	upstream	-421	421	Upstream
chr2	11911897	11912098	202	*	118	44	0	5.09	X2.11911997	AT2G27960	11910723	11911685	-	upstream	-212	212	Upstream
chr2	11956157	11956358	202	*	320	531.9	0	999	X2.11956257	AT2G28070	11956432	11959782	+	upstream	-275	74	Upstream
chr2	11994942	11995143	202	*	114	35.8	0	2.67	X2.11995042	AT2G28140	11994966	11996002	+	overlapStart	-24	24	Upstream
chr2	12103364	12103565	202	*	122	53.3	0	8.97	X2.12103464	AT2G28340	12103672	12106172	+	upstream	-308	107	Upstream
chr2	12157364	12157565	202	*	132	78.1	0	22.03	X2.12157464	AT2G28420	12157923	12158791	+	upstream	-559	358	Upstream
chr2	12188111	12188312	202	*	120	50	0	7.32	X2.12188211	AT2G28500	12186569	12188142	-	overlapStart	31	31	Upstream
chr2	12254396	12254597	202	*	116	40	0	3.79	X2.12254496	AT2G28605	12254888	12255837	+	upstream	-492	291	Upstream
chr2	12499770	12499971	202	*	143	105	0	39.11	X2.12499870	AT2G29090	12494851	12499723	-	upstream	-47	47	Upstream
chr2	12523273	12523474	202	*	138	91.8	0	30.16	X2.12523373	AT2G29125	12523342	12524109	+	overlapStart	-69	69	Upstream
chr2	12548657	12548858	202	*	127	65.4	0	14.67	X2.12548757	AT2G29190	12543812	12548563	-	upstream	-94	94	Upstream
chr2	12613163	12613364	202	*	125	62.7	0	13.15	X2.12613263	AT2G29390	12610543	12612894	-	upstream	-269	269	Upstream
chr2	12615534	12615735	202	*	145	109.7	0	42.74	X2.12615634	AT2G29400	12613081	12615399	-	upstream	-135	135	Upstream
chr2	12634418	12634619	202	*	116	40.2	0	4.1	X2.12634518	AT2G29510	12634514	12638018	+	overlapStart	-96	96	Upstream
chr2	12685455	12685656	202	*	123	55.9	0	9.85	X2.12685555	AT2G29670	12681958	12685087	-	upstream	-368	368	Upstream
chr2	12703002	12703203	202	*	187	212	0	134.05	X2.12703102	AT2G29730	12703537	12705181	+	upstream	-535	334	Upstream
chr2	12805130	12805331	202	*	137	90	0	28.85	X2.12805230	AT2G30000	12803853	12804977	-	upstream	-153	153	Upstream
chr2	12805130	12805331	202	*	137	90	0	28.85	X2.12805230	AT2G30010	12805724	12809386	+	upstream	-594	393	Upstream
chr2	12840473	12840674	202	*	125	61.7	0	12.66	X2.12840573	AT2G30080	12838730	12840112	-	upstream	-361	361	Upstream
chr2	12928257	12928458	202	*	115	37	0	2.93	X2.12928357	AT2G30320	12925728	12927896	-	upstream	-361	361	Upstream
chr2	12939110	12939311	202	*	119	46.5	0	6.16	X2.12939210	AT2G30360	12936979	12938834	-	upstream	-276	276	Upstream
chr2	12942286	12942487	202	*	113	33.7	0	2.17	X2.12942386	AT2G30370	12940455	12942409	-	overlapStart	123	78	Upstream
chr2	13011675	13011876	202	*	169	169	0	92.12	X2.13011775	AT2G30540	13011105	13011784	-	overlapStart	109	92	Upstream
chr2	13049676	13049877	202	*	114	34.5	0	2.41	X2.13049776	AT2G30630	13046672	13049219	-	upstream	-457	457	Upstream
chr2	13056451	13056652	202	*	116	40	0	3.79	X2.13056551	AT2G30650	13053777	13056380	-	upstream	-71	71	Upstream
chr2	13073070	13073271	202	*	114	35	0	2.41	X2.13073170	AT2G30680	13073648	13075396	+	upstream	-578	377	Upstream
chr2	13126913	13127114	202	*	114	36	0	2.66	X2.13127013	AT2G30800	13120353	13126770	-	upstream	-143	143	Upstream
chr2	13138978	13139179	202	*	145	111	0	43.48	X2.13139078	AT2G30860	13138997	13140245	+	overlapStart	-19	19	Upstream
chr2	13146275	13146476	202	*	114	36	0	2.66	X2.13146375	AT2G30880	13142665	13145916	-	upstream	-359	359	Upstream
chr2	13148822	13149023	202	*	120	49	0	6.92	X2.13148922	AT2G30900	13149414	13152542	+	upstream	-592	391	Upstream
chr2	13166687	13166888	202	*	116	41	0	4.1	X2.13166787	AT2G30933	13164059	13166726	-	overlapStart	39	39	Upstream
chr2	13241233	13241434	202	*	132	77.4	0	21.44	X2.13241333	AT2G31082	13241440	13241700	+	upstream	-207	6	Upstream
chr2	13272002	13272203	202	*	128	69.9	0	16.93	X2.13272102	AT2G31150	13272375	13274578	+	upstream	-373	172	Upstream
chr2	13338791	13338992	202	*	115	37.7	0	3.21	X2.13338891	AT2G31280	13339087	13343666	+	upstream	-296	95	Upstream
chr2	13343402	13343603	202	*	137	90.6	0	29.51	X2.13343502	AT2G31290	13343814	13346070	+	upstream	-412	211	Upstream
chr2	13352793	13352994	202	*	123	56.4	0	10.3	X2.13352893	AT2G31310	13352917	13353672	+	overlapStart	-124	77	Upstream
chr2	13448238	13448439	202	*	115	36.4	0	2.93	X2.13448338	AT2G31590	13446829	13448133	-	upstream	-105	105	Upstream
chr2	13473421	13473622	202	*	146	112	0	44.22	X2.13473521	AT2G31670	13472537	13473504	-	overlapStart	83	83	Upstream
chr2	13487857	13488058	202	*	116	41	0	4.1	X2.13487957	AT2G31725	13486317	13487445	-	upstream	-412	412	Upstream
chr2	13576838	13577039	202	*	128	68.1	0	16.39	X2.13576938	AT2G31920	13574032	13576367	-	upstream	-471	471	Upstream
chr2	13587218	13587419	202	*	117	43.4	0	5.09	X2.13587318	AT2G31957	13587709	13588252	+	upstream	-491	290	Upstream
chr2	13616228	13616429	202	*	117	42.2	0	4.75	X2.13616328	AT2G31985	13613928	13615692	-	upstream	-536	536	Upstream
chr2	13721977	13722178	202	*	154	131.2	0	59.86	X2.13722077	AT2G32300	13722427	13723590	+	upstream	-450	249	Upstream
chr2	13740775	13740976	202	*	138	92	0	30.16	X2.13740875	AT2G32370	13740878	13746286	+	overlapStart	-103	98	Upstream
chr2	13787064	13787265	202	*	116	40	0	3.79	X2.13787164	AT2G32470	13787172	13788894	+	overlapStart	-108	93	Upstream
chr2	13840256	13840457	202	*	162	151.6	0	76.8	X2.13840356	AT2G32620	13840744	13844324	+	upstream	-488	287	Upstream
chr2	13925179	13925380	202	*	115	38.4	0	3.5	X2.13925279	AT2G32810	13919127	13925351	-	overlapStart	172	29	Upstream
chr2	13925179	13925380	202	*	115	38.4	0	3.5	X2.13925279	AT2G32820	13925817	13926979	+	upstream	-638	437	Upstream
chr2	13929985	13930186	202	*	198	237.9	0	161.29	X2.13930085	AT2G32830	13927699	13929713	-	upstream	-272	272	Upstream
chr2	13940148	13940349	202	*	114	34	0	2.17	X2.13940248	AT2G32860	13940187	13943804	+	overlapStart	-39	39	Upstream
chr2	14002744	14002945	202	*	140	97.4	0	34.2	X2.14002844	AT2G32990	14003250	14006017	+	upstream	-506	305	Upstream
chr2	14016547	14016748	202	*	118	44.8	0	5.44	X2.14016647	AT2G33020	14013874	14016516	-	upstream	-31	31	Upstream
chr2	14125413	14125614	202	*	283	443.5	0	999	X2.14125513	AT2G33330	14122890	14125137	-	upstream	-276	276	Upstream
chr2	14139789	14139990	202	*	117	41.1	0	4.42	X2.14139889	AT2G33360	14139798	14143118	+	overlapStart	-9	9	Upstream
chr2	14200366	14200567	202	*	130	74	0	19.14	X2.14200466	AT2G33530	14197646	14200560	-	overlapStart	194	7	Upstream
chr2	14226321	14226522	202	*	135	86.8	0	26.93	X2.14226421	AT2G33600	14226766	14228711	+	upstream	-445	244	Upstream
chr2	14249359	14249560	202	*	117	42.6	0	4.75	X2.14249459	AT2G33680	14249608	14251791	+	upstream	-249	48	Upstream
chr2	14269040	14269241	202	*	180	194	0	115.98	X2.14269140	AT2G33740	14269581	14271723	+	upstream	-541	340	Upstream
chr2	14322024	14322225	202	*	123	57.2	0	10.76	X2.14322124	AT2G33850	14321062	14322049	-	overlapStart	25	25	Upstream
chr2	14328801	14329002	202	*	144	107.8	0	41.28	X2.14328901	AT2G33860	14325269	14328978	-	overlapStart	177	24	Upstream
chr2	14338679	14338880	202	*	131	77	0	20.85	X2.14338779	AT2G33870	14337366	14338251	-	upstream	-428	428	Upstream
chr2	14344298	14344499	202	*	120	48.4	0	6.92	X2.14344398	AT2G33880	14341430	14343778	-	upstream	-520	520	Upstream
chr2	14423695	14423896	202	*	128	70	0	16.93	X2.14423795	AT2G34150	14419295	14423478	-	upstream	-217	217	Upstream
chr2	14484924	14485125	202	*	115	37	0	2.93	X2.14485024	AT2G34320	14484959	14485837	+	overlapStart	-35	35	Upstream
chr2	14523552	14523753	202	*	116	41	0	4.1	X2.14523652	AT2G34420	14522524	14523568	-	overlapStart	16	16	Upstream
chr2	14532437	14532638	202	*	118	45.1	0	5.8	X2.14532537	AT2G34470	14530735	14532505	-	overlapStart	68	68	Upstream
chr2	14567703	14567904	202	*	118	45	0	5.44	X2.14567803	AT2G34580	14565660	14567673	-	upstream	-30	30	Upstream
chr2	14578044	14578245	202	*	129	70.9	0	17.47	X2.14578144	AT2G34630	14578540	14581727	+	upstream	-496	295	Upstream
chr2	14629084	14629285	202	*	119	46.1	0	6.16	X2.14629184	AT2G34680	14616622	14629129	-	overlapStart	45	45	Upstream
chr2	14652379	14652580	202	*	207	260.4	0	186.43	X2.14652479	AT2G34720	14649767	14651627	-	upstream	-752	752	Upstream
chr2	14664351	14664552	202	*	135	86	0	26.3	X2.14664451	AT2G34750	14660299	14664268	-	upstream	-83	83	Upstream
chr2	14665098	14665299	202	*	114	36	0	2.66	X2.14665198	AT2G34770	14665667	14668250	+	upstream	-569	368	Upstream
chr2	14710086	14710287	202	*	142	102	0	36.98	X2.14710186	AT2G34870	14710777	14711453	+	upstream	-691	490	Upstream
chr2	14764978	14765179	202	*	115	37.7	0	3.21	X2.14765078	AT2G35035	14763178	14765079	-	overlapStart	101	100	Upstream
chr2	14796093	14796294	202	*	118	45	0	5.44	X2.14796193	AT2G35100	14793651	14795629	-	upstream	-464	464	Upstream
chr2	14807594	14807795	202	*	134	82.5	0	24.43	X2.14807694	AT2G35120	14805639	14807369	-	upstream	-225	225	Upstream
chr2	14829949	14830150	202	*	115	37.7	0	3.21	X2.14830049	AT2G35190	14830626	14833319	+	upstream	-677	476	Upstream
chr2	14864782	14864983	202	*	177	187	0	109.15	X2.14864882	AT2G35310	14864855	14866598	+	overlapStart	-73	73	Upstream
chr2	14902478	14902679	202	*	121	51.2	0	8.13	X2.14902578	AT2G35430	14900872	14902385	-	upstream	-93	93	Upstream
chr2	14965299	14965500	202	*	156	135.4	0	63.15	X2.14965399	AT2G35620	14960940	14965497	-	overlapStart	198	3	Upstream
chr2	14982323	14982524	202	*	122	54	0	8.97	X2.14982423	AT2G35640	14982835	14984182	+	upstream	-512	311	Upstream
chr2	14988252	14988453	202	*	155	134.7	0	62.32	X2.14988352	AT2G35660	14988447	14990426	+	overlapStart	-195	6	Upstream
chr2	15030537	15030738	202	*	121	51.6	0	8.13	X2.15030637	AT2G35750	15029829	15030290	-	upstream	-247	247	Upstream
chr2	15040088	15040289	202	*	122	55.3	0	9.85	X2.15040188	AT2G35780	15037662	15040127	-	overlapStart	39	39	Upstream
chr2	15040088	15040289	202	*	122	55.3	0	9.85	X2.15040188	AT2G35790	15040679	15042123	+	upstream	-591	390	Upstream
chr2	15041508	15041709	202	*	157	140	0	66.49	X2.15041608	AT2G35795	15042175	15043575	+	upstream	-667	466	Upstream
chr2	15051674	15051875	202	*	114	36	0	2.93	X2.15051774	AT2G35830	15052199	15053275	+	upstream	-525	324	Upstream
chr2	15065884	15066085	202	*	113	33.6	0	2.17	X2.15065984	AT2G35880	15062988	15065870	-	upstream	-14	14	Upstream
chr2	15126119	15126320	202	*	136	88.1	0	28.21	X2.15126219	AT2G36026	15127265	15127816	+	upstream	-1146	945	Upstream
chr2	15144482	15144683	202	*	131	75.1	0	20.28	X2.15144582	AT2G36060	15142677	15144182	-	upstream	-300	300	Upstream
chr2	15204641	15204842	202	*	171	172.8	0	95.84	X2.15204741	AT2G36261	15203904	15204146	-	upstream	-495	495	Upstream
chr2	15272789	15272990	202	*	125	62.7	0	13.15	X2.15272889	AT2G36400	15270088	15272823	-	overlapStart	34	34	Upstream
chr2	15294864	15295065	202	*	451	850	0	999	X2.15294964	AT2G36450	15294303	15294857	-	upstream	-7	7	Upstream
chr2	15308108	15308309	202	*	182	200	0	121.93	X2.15308208	AT2G36485	15306954	15307794	-	upstream	-314	314	Upstream
chr2	15315210	15315411	202	*	127	66	0	14.67	X2.15315310	AT2G36490	15308021	15314807	-	upstream	-403	403	Upstream
chr2	15364812	15365013	202	*	145	109	0	42.01	X2.15364912	AT2G36660	15361321	15364398	-	upstream	-414	414	Upstream
chr2	15391199	15391400	202	*	118	44	0	5.09	X2.15391299	AT2G36710	15389466	15391251	-	overlapStart	52	52	Upstream
chr2	15417035	15417236	202	*	129	71	0	17.47	X2.15417135	AT2G36770	15415139	15416766	-	upstream	-269	269	Upstream
chr2	15425093	15425294	202	*	116	40.7	0	4.1	X2.15425193	AT2G36800	15423380	15425016	-	upstream	-77	77	Upstream
chr2	15439824	15440025	202	*	147	115	0	46.47	X2.15439924	AT2G36810	15425479	15439462	-	upstream	-362	362	Upstream
chr2	15454100	15454301	202	*	198	237	0	160.22	X2.15454200	AT2G36840	15451573	15453714	-	upstream	-386	386	Upstream
chr2	15470132	15470333	202	*	139	96.6	0	33.51	X2.15470232	AT2G36850	15454697	15469889	-	upstream	-243	243	Upstream
chr2	15469308	15469509	202	*	170	170	0	93.05	X2.15469408	AT2G36854	15469719	15469904	+	upstream	-411	210	Upstream
chr2	15474699	15474900	202	*	115	38.6	0	3.5	X2.15474799	AT2G36870	15472645	15474681	-	upstream	-18	18	Upstream
chr2	15483870	15484071	202	*	115	37.9	0	3.21	X2.15483970	AT2G36885	15482003	15483711	-	upstream	-159	159	Upstream
chr2	15528899	15529100	202	*	114	34	0	2.17	X2.15528999	AT2G36970	15529006	15530749	+	overlapStart	-107	94	Upstream
chr2	15548878	15549079	202	*	128	69.8	0	16.93	X2.15548978	AT2G37025	15549052	15552105	+	overlapStart	-174	27	Upstream
chr2	15585529	15585730	202	*	129	70.7	0	17.47	X2.15585629	AT2G37080	15581386	15585186	-	upstream	-343	343	Upstream
chr2	15600207	15600408	202	*	117	42.7	0	4.75	X2.15600307	AT2G37130	15597921	15600077	-	upstream	-130	130	Upstream
chr2	15636627	15636828	202	*	118	44	0	5.09	X2.15636727	AT2G37220	15634525	15636409	-	upstream	-218	218	Upstream
chr2	15644725	15644926	202	*	117	42.7	0	4.75	X2.15644825	AT2G37260	15644840	15647065	+	overlapStart	-115	86	Upstream
chr2	15664628	15664829	202	*	119	47	0	6.16	X2.15664728	AT2G37300	15662567	15664599	-	upstream	-29	29	Upstream
chr2	15792157	15792358	202	*	113	33.2	0	2.17	X2.15792257	AT2G37650	15792623	15795235	+	upstream	-466	265	Upstream
chr2	15838664	15838865	202	*	137	91	0	29.51	X2.15838764	AT2G37780	15837442	15838302	-	upstream	-362	362	Upstream
chr2	15838664	15838865	202	*	137	91	0	29.51	X2.15838764	AT2G37790	15838764	15840932	+	overlapStart	-100	100	Upstream
chr2	15856509	15856710	202	*	114	34	0	2.17	X2.15856609	AT2G37860	15856630	15858920	+	overlapStart	-121	80	Upstream
chr2	15858451	15858652	202	*	129	72	0	18.02	X2.15858551	AT2G37870	15859239	15859907	+	upstream	-788	587	Upstream
chr2	15866397	15866598	202	*	189	216.6	0	139.19	X2.15866497	AT2G37900	15864396	15866408	-	overlapStart	11	11	Upstream
chr2	15889503	15889704	202	*	132	78	0	21.44	X2.15889603	AT2G37960	15886548	15889220	-	upstream	-283	283	Upstream
chr2	15928351	15928552	202	*	188	214	0	136.1	X2.15928451	AT2G38070	15928591	15930794	+	upstream	-240	39	Upstream
chr2	15981641	15981842	202	*	171	173	0	95.84	X2.15981741	AT2G38130	15978512	15980749	-	upstream	-892	892	Upstream
chr2	15999608	15999809	202	*	333	563	0	999	X2.15999708	AT2G38185	15999926	16003169	+	upstream	-318	117	Upstream
chr2	16001664	16001865	202	*	114	34.9	0	2.41	X2.16001764	AT2G38195	16002263	16006654	+	upstream	-599	398	Upstream
chr2	16071030	16071231	202	*	151	124	0	53.44	X2.16071130	AT2G38360	16069615	16070589	-	upstream	-441	441	Upstream
chr2	16128303	16128504	202	*	115	37	0	2.93	X2.16128403	AT2G38530	16128378	16129158	+	overlapStart	-75	75	Upstream
chr2	16130261	16130462	202	*	117	42	0	4.42	X2.16130361	AT2G38540	16130350	16131174	+	overlapStart	-89	89	Upstream
chr2	16137478	16137679	202	*	114	34	0	2.17	X2.16137578	AT2G38580	16138570	16142588	+	upstream	-1092	891	Upstream
chr2	16145086	16145287	202	*	115	37.2	0	3.21	X2.16145186	AT2G38600	16145907	16146857	+	upstream	-821	620	Upstream
chr2	16160281	16160482	202	*	122	54	0	8.97	X2.16160381	AT2G38646	16160576	16160809	+	upstream	-295	94	Upstream
chr2	16198644	16198845	202	*	177	186.9	0	109.15	X2.16198744	AT2G38750	16196265	16198491	-	upstream	-153	153	Upstream
chr2	16223446	16223647	202	*	122	54.2	0	9.41	X2.16223546	AT2G38823	16224072	16225296	+	upstream	-626	425	Upstream
chr2	16273900	16274101	202	*	234	325	0	260.84	X2.16274000	AT2G38970	16273901	16276872	+	overlapStart	-1	1	Upstream
chr2	16282010	16282211	202	*	150	121	0	51.08	X2.16282110	AT2G38995	16282120	16284868	+	overlapStart	-110	91	Upstream
chr2	16318978	16319179	202	*	144	107.9	0	41.28	X2.16319078	AT2G39110	16319664	16321685	+	upstream	-686	485	Upstream
chr2	16368568	16368769	202	*	114	34	0	2.17	X2.16368668	AT2G39210	16366157	16368275	-	upstream	-293	293	Upstream
chr2	16381332	16381533	202	*	161	148	0	73.32	X2.16381432	AT2G39230	16381647	16384250	+	upstream	-315	114	Upstream
chr2	16455287	16455488	202	*	120	49	0	6.92	X2.16455387	AT2G39410	16455569	16458217	+	upstream	-282	81	Upstream
chr2	16469845	16470046	202	*	191	220.6	0	143.33	X2.16469945	AT2G39440	16467855	16469628	-	upstream	-217	217	Upstream
chr2	16500646	16500847	202	*	114	36	0	2.66	X2.16500746	AT2G39540	16500866	16501241	+	upstream	-220	19	Upstream
chr2	16506717	16506918	202	*	123	55.9	0	9.85	X2.16506817	AT2G39560	16504846	16506008	-	upstream	-709	709	Upstream
chr2	16534105	16534306	202	*	121	51	0	7.72	X2.16534205	AT2G39670	16534230	16537318	+	overlapStart	-125	76	Upstream
chr2	16563634	16563835	202	*	114	34	0	2.17	X2.16563734	AT2G39710	16561788	16563380	-	upstream	-254	254	Upstream
chr2	16637553	16637754	202	*	123	56	0	9.85	X2.16637653	AT2G39855	16637677	16639308	+	overlapStart	-124	77	Upstream
chr2	16665919	16666120	202	*	168	165	0	88.45	X2.16666019	AT2G39930	16666023	16672494	+	overlapStart	-104	97	Upstream
chr2	16750010	16750211	202	*	120	50	0	7.32	X2.16750110	AT2G40113	16750035	16751084	+	overlapStart	-25	25	Upstream
chr2	16774782	16774983	202	*	148	117	0	47.99	X2.16774882	AT2G40150	16775442	16777243	+	upstream	-660	459	Upstream
chr2	16790474	16790675	202	*	114	35	0	2.41	X2.16790574	AT2G40200	16791098	16792090	+	upstream	-624	423	Upstream
chr2	16797662	16797863	202	*	159	144	0	69.88	X2.16797762	AT2G40220	16796599	16797585	-	upstream	-77	77	Upstream
chr2	16810735	16810936	202	*	189	217	0	139.19	X2.16810835	AT2G40240	16811026	16812228	+	upstream	-291	90	Upstream
chr2	16839942	16840143	202	*	161	148	0	73.32	X2.16840042	AT2G40320	16840147	16842282	+	upstream	-205	4	Upstream
chr2	16903818	16904019	202	*	115	36.4	0	2.93	X2.16903918	AT2G40470	16902304	16903652	-	upstream	-166	166	Upstream
chr2	16908311	16908512	202	*	116	38.9	0	3.49	X2.16908411	AT2G40475	16906911	16908128	-	upstream	-183	183	Upstream
chr2	16910122	16910323	202	*	120	50	0	7.32	X2.16910222	AT2G40480	16910364	16912592	+	upstream	-242	41	Upstream
chr2	16946452	16946653	202	*	124	60	0	11.69	X2.16946552	AT2G40590	16945045	16946419	-	upstream	-33	33	Upstream
chr2	16964091	16964292	202	*	137	91	0	29.51	X2.16964191	AT2G40640	16961140	16963205	-	upstream	-886	886	Upstream
chr2	17044616	17044817	202	*	177	187.5	0	110.12	X2.17044716	AT2G40840	17044963	17050947	+	upstream	-347	146	Upstream
chr2	17076436	17076637	202	*	121	51.8	0	8.13	X2.17076536	AT2G40925	17074905	17076239	-	upstream	-197	197	Upstream
chr2	17132272	17132473	202	*	116	40.6	0	4.1	X2.17132372	AT2G41080	17132853	17134593	+	upstream	-581	380	Upstream
chr2	17134571	17134772	202	*	120	49.4	0	7.32	X2.17134671	AT2G41082	17134825	17134929	+	upstream	-254	53	Upstream
chr2	17268426	17268627	202	*	118	44	0	5.09	X2.17268526	AT2G41420	17266477	17268024	-	upstream	-402	402	Upstream
chr2	17282421	17282622	202	*	125	60.9	0	12.17	X2.17282521	AT2G41451	17282899	17285361	+	upstream	-478	277	Upstream
chr2	17285520	17285721	202	*	143	105.6	0	39.83	X2.17285620	AT2G41460	17285723	17288928	+	upstream	-203	2	Upstream
chr2	17298580	17298781	202	*	144	107	0	40.55	X2.17298680	AT2G41480	17296812	17298731	-	overlapStart	151	50	Upstream
chr2	17313996	17314197	202	*	143	106.2	0	40.55	X2.17314096	AT2G41510	17314532	17317003	+	upstream	-536	335	Upstream
chr2	17330976	17331177	202	*	130	73.1	0	19.14	X2.17331076	AT2G41550	17328970	17331173	-	overlapStart	197	4	Upstream
chr2	17457322	17457523	202	*	121	53	0	8.55	X2.17457422	AT2G41830	17450109	17457087	-	upstream	-235	235	Upstream
chr2	17461829	17462030	202	*	126	64.9	0	14.17	X2.17461929	AT2G41840	17459788	17461539	-	upstream	-290	290	Upstream
chr2	17480740	17480941	202	*	117	43	0	4.75	X2.17480840	AT2G41890	17478058	17480352	-	upstream	-388	388	Upstream
chr2	17577681	17577882	202	*	117	41.3	0	4.42	X2.17577781	AT2G42160	17574641	17577463	-	upstream	-218	218	Upstream
chr2	17577681	17577882	202	*	117	41.3	0	4.42	X2.17577781	AT2G42170	17577714	17580392	+	overlapStart	-33	33	Upstream
chr2	17582825	17583026	202	*	123	55.6	0	9.85	X2.17582925	AT2G42190	17582869	17584194	+	overlapStart	-44	44	Upstream
chr2	17587288	17587489	202	*	119	46.1	0	6.16	X2.17587388	AT2G42200	17587407	17589630	+	overlapStart	-119	82	Upstream
chr2	17652593	17652794	202	*	115	36.7	0	2.92	X2.17652693	AT2G42390	17651253	17652588	-	upstream	-5	5	Upstream
chr2	17662754	17662955	202	*	120	48.5	0	6.92	X2.17662854	AT2G42430	17663444	17665295	+	upstream	-690	489	Upstream
chr2	17704326	17704527	202	*	130	72.5	0	18.58	X2.17704426	AT2G42520	17704832	17708947	+	upstream	-506	305	Upstream
chr2	17717331	17717532	202	*	116	39.5	0	3.79	X2.17717431	AT2G42560	17714638	17716912	-	upstream	-419	419	Upstream
chr2	17733962	17734163	202	*	117	43	0	4.75	X2.17734062	AT2G42590	17731855	17733967	-	overlapStart	5	5	Upstream
chr2	17809822	17810023	202	*	123	56.9	0	10.3	X2.17809922	AT2G42800	17807942	17809590	-	upstream	-232	232	Upstream
chr2	17837627	17837828	202	*	157	139	0	65.65	X2.17837727	AT2G42870	17836416	17837250	-	upstream	-377	377	Upstream
chr2	17861102	17861303	202	*	119	46.3	0	6.16	X2.17861202	AT2G42930	17860868	17861272	-	overlapStart	170	31	Upstream
chr2	17920016	17920217	202	*	114	34.9	0	2.41	X2.17920116	AT2G43100	17920660	17921689	+	upstream	-644	443	Upstream
chr2	17958049	17958250	202	*	121	51	0	7.72	X2.17958149	AT2G43200	17958230	17960536	+	overlapStart	-181	20	Upstream
chr2	17995526	17995727	202	*	114	34.2	0	2.41	X2.17995626	AT2G43310	17995901	17996688	+	upstream	-375	174	Upstream
chr2	18000479	18000680	202	*	116	40	0	3.79	X2.18000579	AT2G43330	18000854	18004083	+	upstream	-375	174	Upstream
chr2	18044514	18044715	202	*	124	59.6	0	11.69	X2.18044614	AT2G43450	18043234	18044225	-	upstream	-289	289	Upstream
chr2	18122581	18122782	202	*	275	423	0	999	X2.18122681	AT2G43720	18123267	18124338	+	upstream	-686	485	Upstream
chr2	18132318	18132519	202	*	116	40.4	0	4.1	X2.18132418	AT2G43760	18132673	18134068	+	upstream	-355	154	Upstream
chr2	18213995	18214196	202	*	116	40	0	3.79	X2.18214095	AT2G44000	18214324	18215571	+	upstream	-329	128	Upstream
chr2	18253590	18253791	202	*	125	62	0	12.66	X2.18253690	AT2G44130	18253610	18255054	+	overlapStart	-20	20	Upstream
chr2	18274303	18274504	202	*	128	70	0	16.93	X2.18274403	AT2G44195	18274806	18275792	+	upstream	-503	302	Upstream
chr2	18308714	18308915	202	*	122	54	0	8.97	X2.18308814	AT2G44300	18307309	18308349	-	upstream	-365	365	Upstream
chr2	18308714	18308915	202	*	122	54	0	8.97	X2.18308814	AT2G44310	18309212	18309826	+	upstream	-498	297	Upstream
chr2	18329912	18330113	202	*	132	78	0	21.44	X2.18330012	AT2G44420	18330473	18332913	+	upstream	-561	360	Upstream
chr2	18345998	18346199	202	*	135	86	0	26.3	X2.18346098	AT2G44460	18346439	18349966	+	upstream	-441	240	Upstream
chr2	18432075	18432276	202	*	114	34	0	2.17	X2.18432175	AT2G44710	18432719	18437132	+	upstream	-644	443	Upstream
chr2	18582526	18582727	202	*	137	89.6	0	28.85	X2.18582626	AT2G45050	18582872	18584083	+	upstream	-346	145	Upstream
chr2	18591396	18591597	202	*	147	115	0	46.47	X2.18591496	AT2G45080	18591665	18592455	+	upstream	-269	68	Upstream
chr2	18608430	18608631	202	*	164	155.5	0	80.33	X2.18608530	AT2G45135	18608824	18610574	+	upstream	-394	193	Upstream
chr2	18610227	18610428	202	*	118	44.7	0	5.44	X2.18610327	AT2G45140	18610806	18613290	+	upstream	-579	378	Upstream
chr2	18661200	18661401	202	*	131	76	0	20.27	X2.18661300	AT2G45250	18661464	18663029	+	upstream	-264	63	Upstream
chr2	18713094	18713295	202	*	118	44	0	5.09	X2.18713194	AT2G45410	18712287	18713116	-	overlapStart	22	22	Upstream
chr2	18743988	18744189	202	*	240	339	0	257.22	X2.18744088	AT2G45470	18742540	18744111	-	overlapStart	123	78	Upstream
chr2	18822137	18822338	202	*	122	53.9	0	8.97	X2.18822237	AT2G45680	18820242	18821889	-	upstream	-248	248	Upstream
chr2	18956404	18956605	202	*	125	62	0	12.66	X2.18956504	AT2G46110	18954570	18956530	-	overlapStart	126	75	Upstream
chr2	19010949	19011150	202	*	175	183	0	105.3	X2.19011049	AT2G46310	19011503	19012857	+	upstream	-554	353	Upstream
chr2	19037245	19037446	202	*	118	44	0	5.09	X2.19037345	AT2G46375	19037864	19038379	+	upstream	-619	418	Upstream
chr2	19050420	19050621	202	*	117	42	0	4.42	X2.19050520	AT2G46410	19049172	19050341	-	upstream	-79	79	Upstream
chr2	19053508	19053709	202	*	119	47.3	0	6.54	X2.19053608	AT2G46420	19053686	19057096	+	overlapStart	-178	23	Upstream
chr2	19061700	19061901	202	*	116	39.9	0	3.79	X2.19061800	AT2G46440	19061861	19064881	+	overlapStart	-161	40	Upstream
chr2	19065460	19065661	202	*	148	117.3	0	48.76	X2.19065560	AT2G46450	19065716	19069569	+	upstream	-256	55	Upstream
chr2	19078383	19078584	202	*	116	40.7	0	4.1	X2.19078483	AT2G46480	19076405	19078386	-	overlapStart	3	3	Upstream
chr2	19109242	19109443	202	*	120	48.9	0	6.92	X2.19109342	AT2G46535	19109620	19110497	+	upstream	-378	177	Upstream
chr2	19126358	19126559	202	*	115	38.4	0	3.5	X2.19126458	AT2G46570	19126872	19129069	+	upstream	-514	313	Upstream
chr2	19197286	19197487	202	*	117	42	0	4.42	X2.19197386	AT2G46720	19197383	19200221	+	overlapStart	-97	97	Upstream
chr2	19214974	19215175	202	*	136	88.8	0	28.21	X2.19215074	AT2G46760	19213028	19215166	-	overlapStart	192	9	Upstream
chr2	19294234	19294435	202	*	116	39	0	3.49	X2.19294334	AT2G46960	19292049	19294260	-	overlapStart	26	26	Upstream
chr2	19336398	19336599	202	*	118	45.3	0	5.8	X2.19336498	AT2G47070	19336695	19340869	+	upstream	-297	96	Upstream
chr2	19370746	19370947	202	*	115	38	0	3.21	X2.19370846	AT2G47180	19368798	19370441	-	upstream	-305	305	Upstream
chr2	19378180	19378381	202	*	131	74.9	0	19.7	X2.19378280	AT2G47200	19377729	19378331	-	overlapStart	151	50	Upstream
chr2	19378180	19378381	202	*	131	74.9	0	19.7	X2.19378280	AT2G47210	19378869	19382418	+	upstream	-689	488	Upstream
chr2	19426253	19426454	202	*	235	328	0	264.47	X2.19426353	AT2G47320	19427372	19428933	+	upstream	-1119	918	Upstream
chr2	19476255	19476456	202	*	190	218	0	140.22	X2.19476355	AT2G47460	19476337	19479478	+	overlapStart	-82	82	Upstream
chr2	19517536	19517737	202	*	119	48.2	0	6.92	X2.19517636	AT2G47570	19515898	19517361	-	upstream	-175	175	Upstream
chr2	19521744	19521945	202	*	114	34	0	2.17	X2.19521844	AT2G47590	19521797	19524063	+	overlapStart	-53	53	Upstream
chr2	19536653	19536854	202	*	114	36	0	2.67	X2.19536753	AT2G47640	19537178	19538624	+	upstream	-525	324	Upstream
chr2	19567764	19567965	202	*	133	80	0	22.62	X2.19567864	AT2G47770	19568464	19569507	+	upstream	-700	499	Upstream
chr2	19595250	19595451	202	*	213	274	0	201.04	X2.19595350	AT2G47840	19594187	19595001	-	upstream	-249	249	Upstream
chr2	19595250	19595451	202	*	213	274	0	201.04	X2.19595350	AT2G47844	19595293	19595439	+	includeFeature	-43	12	Upstream
chr2	19595250	19595451	202	*	213	274	0	201.04	X2.19595350	AT2G47850	19595640	19598581	+	upstream	-390	189	Upstream
chr2	19614195	19614396	202	*	134	83	0	24.43	X2.19614295	AT2G47910	19614698	19615769	+	upstream	-503	302	Upstream
chr2	19617512	19617713	202	*	126	65	0	14.17	X2.19617612	AT2G47930	19616975	19617681	-	overlapStart	169	32	Upstream
chr2	19625223	19625424	202	*	122	55	0	9.41	X2.19625323	AT2G47960	19625614	19629183	+	upstream	-391	190	Upstream
chr2	19641289	19641490	202	*	138	92.7	0	30.82	X2.19641389	AT2G48000	19639007	19640803	-	upstream	-486	486	Upstream
chr2	19641289	19641490	202	*	138	92.7	0	30.82	X2.19641389	AT2G48010	19641377	19643491	+	overlapStart	-88	88	Upstream
chr2	19643940	19644141	202	*	128	70	0	16.93	X2.19644040	AT2G48020	19644100	19647180	+	overlapStart	-160	41	Upstream
chr2	19669571	19669772	202	*	117	43.3	0	5.09	X2.19669671	AT2G48090	19669110	19669764	-	overlapStart	193	8	Upstream
chr2	19673092	19673293	202	*	144	108	0	41.28	X2.19673192	AT2G48110	19673293	19679711	+	overlapStart	-201	0	Upstream
chr2	19681104	19681305	202	*	134	84.4	0	25.67	X2.19681204	AT2G48121	19681637	19682391	+	upstream	-533	332	Upstream
chr2	19685773	19685974	202	*	114	35.6	0	2.67	X2.19685873	AT2G48140	19686409	19687664	+	upstream	-636	435	Upstream
chr3	6313	6514	202	*	115	37	0	2.69	X3.6413	AT3G01030	6657	7772	+	upstream	-344	143	Upstream
chr3	82021	82222	202	*	186	209.1	0	129.41	X3.82121	AT3G01260	80176	82005	-	upstream	-16	16	Upstream
chr3	119618	119819	202	*	135	86	0	25.41	X3.119718	AT3G01329	118873	119178	-	upstream	-440	440	Upstream
chr3	168382	168583	202	*	120	49.2	0	6.91	X3.168482	AT3G01435	166619	168288	-	upstream	-94	94	Upstream
chr3	168382	168583	202	*	120	49.2	0	6.91	X3.168482	AT3G01440	168435	169618	+	overlapStart	-53	53	Upstream
chr3	216979	217180	202	*	120	49.9	0	6.91	X3.217079	AT3G01540	212518	216671	-	upstream	-308	308	Upstream
chr3	258286	258487	202	*	119	46.3	0	5.79	X3.258386	AT3G01700	258879	259631	+	upstream	-593	392	Upstream
chr3	350506	350707	202	*	152	127	0	54.36	X3.350606	AT3G02040	348167	350010	-	upstream	-496	496	Upstream
chr3	350506	350707	202	*	152	127	0	54.36	X3.350606	AT3G02050	350616	354345	+	overlapStart	-110	91	Upstream
chr3	354236	354437	202	*	117	41.8	0	4.12	X3.354336	AT3G02060	354360	358833	+	overlapStart	-124	77	Upstream
chr3	374146	374347	202	*	115	37.9	0	2.96	X3.374246	AT3G02110	370762	373722	-	upstream	-424	424	Upstream
chr3	489153	489354	202	*	114	36	0	2.04	X3.489253	AT3G02380	487236	488693	-	upstream	-460	460	Upstream
chr3	487644	487845	202	*	156	137.4	0	45.99	X3.487744	AT3G02390	488780	489474	+	upstream	-1136	935	Upstream
chr3	489153	489354	202	*	114	36	0	2.04	X3.489253	AT3G02400	489830	491587	+	upstream	-677	476	Upstream
chr3	499130	499331	202	*	128	70	0	16.25	X3.499230	AT3G02420	495885	498841	-	upstream	-289	289	Upstream
chr3	499130	499331	202	*	128	70	0	16.25	X3.499230	AT3G02430	499345	500174	+	upstream	-215	14	Upstream
chr3	512963	513164	202	*	119	47.7	0	6.16	X3.513063	AT3G02490	513525	515925	+	upstream	-562	361	Upstream
chr3	734673	734874	202	*	128	70	0	16.25	X3.734773	AT3G03190	735028	735987	+	upstream	-355	154	Upstream
chr3	786676	786877	202	*	150	121.7	0	50.47	X3.786776	AT3G03330	783332	786209	-	upstream	-467	467	Upstream
chr3	821443	821644	202	*	118	45.5	0	5.44	X3.821543	AT3G03450	819337	821406	-	upstream	-37	37	Upstream
chr3	977653	977854	202	*	128	69	0	15.73	X3.977753	AT3G03820	976933	977223	-	upstream	-430	430	Upstream
chr3	1071574	1071775	202	*	141	99.2	0	34.49	X3.1071674	AT3G04080	1067790	1071295	-	upstream	-279	279	Upstream
chr3	1139509	1139710	202	*	184	204.1	0	124.41	X3.1139609	AT3G04300	1140193	1141030	+	upstream	-684	483	Upstream
chr3	1153378	1153579	202	*	118	43.7	0	4.76	X3.1153478	AT3G04340	1146800	1153341	-	upstream	-37	37	Upstream
chr3	1178382	1178583	202	*	122	53.8	0	8.51	X3.1178482	AT3G04440	1178718	1180700	+	upstream	-336	135	Upstream
chr3	1229569	1229770	202	*	141	100	0	34.49	X3.1229669	AT3G04560	1227360	1229408	-	upstream	-161	161	Upstream
chr3	1257910	1258111	202	*	135	85	0	24.79	X3.1258010	AT3G04630	1258545	1260871	+	upstream	-635	434	Upstream
chr3	1264204	1264405	202	*	125	61.5	0	12.09	X3.1264304	AT3G04660	1264726	1265966	+	upstream	-522	321	Upstream
chr3	1293457	1293658	202	*	164	155.2	0	78.48	X3.1293557	AT3G04740	1293807	1300714	+	upstream	-350	149	Upstream
chr3	1382308	1382509	202	*	140	99	0	33.81	X3.1382408	AT3G04980	1378684	1382181	-	upstream	-127	127	Upstream
chr3	1417252	1417453	202	*	261	390.7	0	999	X3.1417352	AT3G05080	1417907	1418280	+	upstream	-655	454	Upstream
chr3	1435519	1435720	202	*	128	69.9	0	16.25	X3.1435619	AT3G05130	1433475	1435379	-	upstream	-140	140	Upstream
chr3	1471317	1471518	202	*	121	52.7	0	8.1	X3.1471417	AT3G05190	1471397	1475784	+	overlapStart	-80	80	Upstream
chr3	1491377	1491578	202	*	139	95.1	0	31.8	X3.1491477	AT3G05230	1492142	1493619	+	upstream	-765	564	Upstream
chr3	1554498	1554699	202	*	131	75.5	0	19.52	X3.1554598	AT3G05410	1554700	1561535	+	upstream	-202	1	Upstream
chr3	1763947	1764148	202	*	266	403	0	999	X3.1764047	AT3G05900	1761205	1763984	-	overlapStart	37	37	Upstream
chr3	1840522	1840723	202	*	118	45	0	5.44	X3.1840622	AT3G06090	1840773	1841012	+	upstream	-251	50	Upstream
chr3	1884845	1885046	202	*	152	126	0	53.57	X3.1884945	AT3G06220	1883616	1884953	-	overlapStart	108	93	Upstream
chr3	1898907	1899108	202	*	136	89	0	27.27	X3.1899007	AT3G06280	1898155	1898751	-	upstream	-156	156	Upstream
chr3	1924559	1924760	202	*	147	115.2	0	45.93	X3.1924659	AT3G06340	1920207	1923738	-	upstream	-821	821	Upstream
chr3	1975969	1976170	202	*	123	56.4	0	9.8	X3.1976069	AT3G06440	1972622	1975754	-	upstream	-215	215	Upstream
chr3	2015840	2016041	202	*	121	53	0	8.1	X3.2015940	AT3G06510	2016330	2019778	+	upstream	-490	289	Upstream
chr3	2037913	2038114	202	*	117	42.2	0	4.44	X3.2038013	AT3G06540	2035003	2037788	-	upstream	-125	125	Upstream
chr3	2037913	2038114	202	*	117	42.2	0	4.44	X3.2038013	AT3G06545	2038312	2038977	+	upstream	-399	198	Upstream
chr3	2043806	2044007	202	*	118	44.7	0	5.1	X3.2043906	AT3G06560	2044352	2047209	+	upstream	-546	345	Upstream
chr3	2153499	2153700	202	*	118	45.5	0	5.44	X3.2153599	AT3G06820	2150847	2153440	-	upstream	-59	59	Upstream
chr3	2153499	2153700	202	*	118	45.5	0	5.44	X3.2153599	AT3G06830	2153864	2156148	+	upstream	-365	164	Upstream
chr3	2175653	2175854	202	*	115	38.4	0	3.23	X3.2175753	AT3G06880	2169768	2175686	-	overlapStart	33	33	Upstream
chr3	2253800	2254001	202	*	120	50	0	6.91	X3.2253900	AT3G07120	2254479	2255742	+	upstream	-679	478	Upstream
chr3	2290611	2290812	202	*	158	141	0	65.68	X3.2290711	AT3G07200	2290762	2292492	+	overlapStart	-151	50	Upstream
chr3	2324720	2324921	202	*	125	62	0	12.09	X3.2324820	AT3G07290	2321740	2324382	-	upstream	-338	338	Upstream
chr3	2346858	2347059	202	*	145	111	0	42.24	X3.2346958	AT3G07350	2347468	2348791	+	upstream	-610	409	Upstream
chr3	2384213	2384414	202	*	128	68	0	15.22	X3.2384313	AT3G07450	2383610	2383930	-	upstream	-283	283	Upstream
chr3	2422483	2422684	202	*	115	37	0	2.69	X3.2422583	AT3G07590	2423070	2424594	+	upstream	-587	386	Upstream
chr3	2434981	2435182	202	*	152	127	0	54.36	X3.2435081	AT3G07620	2433267	2434988	-	overlapStart	7	7	Upstream
chr3	2434981	2435182	202	*	152	127	0	54.36	X3.2435081	AT3G07630	2435445	2437965	+	upstream	-464	263	Upstream
chr3	2552347	2552548	202	*	213	275.2	0	199.81	X3.2552447	AT3G07990	2552477	2554921	+	overlapStart	-130	71	Upstream
chr3	2599480	2599681	202	*	124	59	0	10.69	X3.2599580	AT3G08560	2600130	2601907	+	upstream	-650	449	Upstream
chr3	2605219	2605420	202	*	124	58	0	10.24	X3.2605319	AT3G08570	2602258	2604412	-	upstream	-807	807	Upstream
chr3	2627810	2628011	202	*	115	38	0	2.96	X3.2627910	AT3G08650	2624461	2627450	-	upstream	-360	360	Upstream
chr3	2699295	2699496	202	*	125	61.7	0	12.09	X3.2699395	AT3G08860	2696559	2699158	-	upstream	-137	137	Upstream
chr3	2740458	2740659	202	*	158	141.9	0	66.51	X3.2740558	AT3G08980	2740808	2742685	+	upstream	-350	149	Upstream
chr3	2745166	2745367	202	*	162	152	0	75	X3.2745266	AT3G09000	2745644	2748459	+	upstream	-478	277	Upstream
chr3	2758738	2758939	202	*	157	139	0	64.02	X3.2758838	AT3G09035	2758820	2760347	+	overlapStart	-82	82	Upstream
chr3	2822667	2822868	202	*	124	60.2	0	11.62	X3.2822767	AT3G09190	2821479	2822687	-	overlapStart	20	20	Upstream
chr3	2993507	2993708	202	*	126	63	0	12.57	X3.2993607	AT3G09750	2991655	2992679	-	upstream	-828	828	Upstream
chr3	3026905	3027106	202	*	154	130.8	0	57.53	X3.3027005	AT3G09863	3027292	3027423	+	upstream	-387	186	Upstream
chr3	3029007	3029208	202	*	128	70	0	16.25	X3.3029107	AT3G09880	3029511	3032256	+	upstream	-504	303	Upstream
chr3	3034060	3034261	202	*	117	42	0	4.12	X3.3034160	AT3G09900	3034557	3036593	+	upstream	-497	296	Upstream
chr3	3038603	3038804	202	*	138	93	0	29.83	X3.3038703	AT3G09910	3036714	3038449	-	upstream	-154	154	Upstream
chr3	3139412	3139613	202	*	126	63.7	0	13.05	X3.3139512	AT3G10150	3137362	3139056	-	upstream	-356	356	Upstream
chr3	3144336	3144537	202	*	117	41.1	0	4.12	X3.3144436	AT3G10160	3139383	3144523	-	overlapStart	187	14	Upstream
chr3	3155062	3155263	202	*	119	47.9	0	6.16	X3.3155162	AT3G10180	3146393	3154644	-	upstream	-418	418	Upstream
chr3	3155062	3155263	202	*	119	47.9	0	6.16	X3.3155162	AT3G10190	3155298	3156143	+	upstream	-236	35	Upstream
chr3	3171312	3171513	202	*	123	57	0	9.8	X3.3171412	AT3G10250	3167951	3170931	-	upstream	-381	381	Upstream
chr3	3179526	3179727	202	*	119	48	0	6.53	X3.3179626	AT3G10280	3180064	3181588	+	upstream	-538	337	Upstream
chr3	3248960	3249161	202	*	146	112	0	40.23	X3.3249060	AT3G10450	3249526	3252506	+	upstream	-566	365	Upstream
chr3	3285597	3285798	202	*	158	141	0	65.68	X3.3285697	AT3G10530	3285892	3288880	+	upstream	-295	94	Upstream
chr3	3399144	3399345	202	*	202	247	0	167.91	X3.3399244	AT3G10860	3399736	3400741	+	upstream	-592	391	Upstream
chr3	3534727	3534928	202	*	118	45	0	5.09	X3.3534827	AT3G11280	3533255	3534847	-	overlapStart	120	81	Upstream
chr3	3577889	3578090	202	*	172	174.9	0	95.59	X3.3577989	AT3G11400	3578388	3580569	+	upstream	-499	298	Upstream
chr3	3601504	3601705	202	*	120	49	0	6.53	X3.3601604	AT3G11440	3602093	3605104	+	upstream	-589	388	Upstream
chr3	3608558	3608759	202	*	115	38	0	2.96	X3.3608658	AT3G11450	3605217	3608086	-	upstream	-472	472	Upstream
chr3	3660249	3660450	202	*	116	39	0	3.23	X3.3660349	AT3G11590	3660377	3663734	+	overlapStart	-128	73	Upstream
chr3	3666664	3666865	202	*	134	84	0	24.19	X3.3666764	AT3G11600	3667229	3667979	+	upstream	-565	364	Upstream
chr3	3672520	3672721	202	*	128	68.9	0	15.73	X3.3672620	AT3G11620	3669319	3672034	-	upstream	-486	486	Upstream
chr3	3672043	3672244	202	*	123	57.1	0	10.24	X3.3672143	AT3G11630	3672120	3674075	+	overlapStart	-77	77	Upstream
chr3	3894124	3894325	202	*	115	37.9	0	2.96	X3.3894224	AT3G12203	3891357	3893981	-	upstream	-143	143	Upstream
chr3	3894124	3894325	202	*	115	37.9	0	2.96	X3.3894224	AT3G12210	3894778	3896066	+	upstream	-654	453	Upstream
chr3	4004060	4004261	202	*	121	53	0	8.1	X3.4004160	AT3G12590	3995722	4003657	-	upstream	-403	403	Upstream
chr3	4004060	4004261	202	*	121	53	0	8.1	X3.4004160	AT3G12600	4004512	4006198	+	upstream	-452	251	Upstream
chr3	4029313	4029514	202	*	125	62	0	12.09	X3.4029413	AT3G12680	4025076	4029140	-	upstream	-173	173	Upstream
chr3	4044801	4045002	202	*	123	55.8	0	9.36	X3.4044901	AT3G12720	4043310	4044609	-	upstream	-192	192	Upstream
chr3	4098948	4099149	202	*	124	60	0	11.15	X3.4099048	AT3G12890	4099199	4100473	+	upstream	-251	50	Upstream
chr3	4172172	4172373	202	*	173	177	0	87.81	X3.4172272	AT3G13030	4169541	4172051	-	upstream	-121	121	Upstream
chr3	4216170	4216371	202	*	139	96.5	0	32.47	X3.4216270	AT3G13110	4214617	4216302	-	overlapStart	132	69	Upstream
chr3	4231873	4232074	202	*	117	42.3	0	4.44	X3.4231973	AT3G13160	4229971	4231286	-	upstream	-587	587	Upstream
chr3	4239528	4239729	202	*	160	146.4	0	70.72	X3.4239628	AT3G13190	4240172	4241961	+	upstream	-644	443	Upstream
chr3	4425426	4425627	202	*	114	35.8	0	2.44	X3.4425526	AT3G13550	4423349	4424883	-	upstream	-543	543	Upstream
chr3	4503891	4504092	202	*	157	137.8	0	63.2	X3.4503991	AT3G13740	4504270	4506311	+	upstream	-379	178	Upstream
chr3	4543895	4544096	202	*	144	107	0	39.37	X3.4543995	AT3G13810	4544364	4547513	+	upstream	-469	268	Upstream
chr3	4578391	4578592	202	*	121	53	0	8.1	X3.4578491	AT3G13890	4576744	4578027	-	upstream	-364	364	Upstream
chr3	4602892	4603093	202	*	116	40	0	3.52	X3.4602992	AT3G13940	4600492	4602486	-	upstream	-406	406	Upstream
chr3	4603454	4603655	202	*	123	56	0	9.36	X3.4603554	AT3G13950	4604149	4605425	+	upstream	-695	494	Upstream
chr3	4647553	4647754	202	*	120	49	0	6.53	X3.4647653	AT3G14030	4646272	4647124	-	upstream	-429	429	Upstream
chr3	4692791	4692992	202	*	120	50.3	0	7.3	X3.4692891	AT3G14160	4693361	4695604	+	upstream	-570	369	Upstream
chr3	4729720	4729921	202	*	114	35	0	2.2	X3.4729820	AT3G14210	4729823	4731803	+	overlapStart	-103	98	Upstream
chr3	4770352	4770553	202	*	115	38.5	0	3.23	X3.4770452	AT3G14300	4766905	4769898	-	upstream	-454	454	Upstream
chr3	4775569	4775770	202	*	131	75	0	18.96	X3.4775669	AT3G14310	4771902	4775119	-	upstream	-450	450	Upstream
chr3	4886249	4886450	202	*	114	34.9	0	2.2	X3.4886349	AT3G14550	4884566	4885982	-	upstream	-267	267	Upstream
chr3	4912007	4912208	202	*	132	79	0	21.23	X3.4912107	AT3G14610	4912466	4914652	+	upstream	-459	258	Upstream
chr3	4914884	4915085	202	*	160	145	0	69.03	X3.4914984	AT3G14620	4914914	4917078	+	overlapStart	-30	30	Upstream
chr3	5001472	5001673	202	*	127	65.4	0	14.06	X3.5001572	AT3G14860	4998357	5001046	-	upstream	-426	426	Upstream
chr3	5047333	5047534	202	*	173	176.8	0	97.45	X3.5047433	AT3G14990	5047400	5049877	+	overlapStart	-67	67	Upstream
chr3	5052100	5052301	202	*	119	46	0	5.79	X3.5052200	AT3G15010	5052731	5054942	+	upstream	-631	430	Upstream
chr3	5109642	5109843	202	*	114	35	0	2.2	X3.5109742	AT3G15170	5109883	5111447	+	upstream	-241	40	Upstream
chr3	5193120	5193321	202	*	118	44	0	4.76	X3.5193220	AT3G15380	5193228	5196591	+	overlapStart	-108	93	Upstream
chr3	5310162	5310363	202	*	121	52	0	8.1	X3.5310262	AT3G15660	5307944	5309581	-	upstream	-581	581	Upstream
chr3	5316472	5316673	202	*	161	149	0	72.43	X3.5316572	AT3G15690	5316916	5319613	+	upstream	-444	243	Upstream
chr3	5403011	5403212	202	*	116	39	0	3.23	X3.5403111	AT3G15950	5397569	5402652	-	upstream	-359	359	Upstream
chr3	5458638	5458839	202	*	119	47.8	0	6.16	X3.5458738	AT3G16100	5459172	5460790	+	upstream	-534	333	Upstream
chr3	5493822	5494023	202	*	132	78	0	20.65	X3.5493922	AT3G16200	5491406	5493629	-	upstream	-193	193	Upstream
chr3	5587753	5587954	202	*	114	35	0	2.2	X3.5587853	AT3G16450	5588394	5590055	+	upstream	-641	440	Upstream
chr3	5655535	5655736	202	*	124	58	0	10.24	X3.5655635	AT3G16600	5652839	5655670	-	overlapStart	135	66	Upstream
chr3	5691930	5692131	202	*	128	68.9	0	15.73	X3.5692030	AT3G16712	5691801	5692016	-	overlapStart	86	86	Upstream
chr3	5708333	5708534	202	*	123	56	0	9.36	X3.5708433	AT3G16780	5708925	5710579	+	upstream	-592	391	Upstream
chr3	5793992	5794193	202	*	120	49	0	6.53	X3.5794092	AT3G16980	5794436	5795827	+	upstream	-444	243	Upstream
chr3	5855277	5855478	202	*	118	45.6	0	5.39	X3.5855377	AT3G17170	5853059	5854906	-	upstream	-371	371	Upstream
chr3	5859573	5859774	202	*	122	53.2	0	8.51	X3.5859673	AT3G17180	5855861	5859157	-	upstream	-416	416	Upstream
chr3	5948981	5949182	202	*	125	60.8	0	11.61	X3.5949081	AT3G17365	5946951	5948868	-	upstream	-113	113	Upstream
chr3	6032146	6032347	202	*	123	56.4	0	9.8	X3.6032246	AT3G17640	6032393	6033583	+	upstream	-247	46	Upstream
chr3	6040135	6040336	202	*	119	48	0	6.16	X3.6040235	AT3G17670	6040820	6042588	+	upstream	-685	484	Upstream
chr3	6048346	6048547	202	*	130	73	0	17.86	X3.6048446	AT3G17700	6048916	6052552	+	upstream	-570	369	Upstream
chr3	6063735	6063936	202	*	141	99.7	0	34.49	X3.6063835	AT3G17730	6064379	6065813	+	upstream	-644	443	Upstream
chr3	6105912	6106113	202	*	150	121.9	0	50.47	X3.6106012	AT3G17840	6106028	6108675	+	overlapStart	-116	85	Upstream
chr3	6153772	6153973	202	*	215	280	0	204.31	X3.6153872	AT3G17998	6154363	6157551	+	upstream	-591	390	Upstream
chr3	6153772	6153973	202	*	215	280	0	204.31	X3.6153872	AT3G18000	6154363	6157552	+	upstream	-591	390	Upstream
chr3	6174467	6174668	202	*	117	41.2	0	4.12	X3.6174567	AT3G18040	6174719	6178465	+	upstream	-252	51	Upstream
chr3	6194433	6194634	202	*	184	205	0	124.41	X3.6194533	AT3G18090	6194564	6200237	+	overlapStart	-131	70	Upstream
chr3	6301767	6301968	202	*	163	153	0	75.87	X3.6301867	AT3G18360	6300827	6301684	-	upstream	-83	83	Upstream
chr3	6305542	6305743	202	*	126	63.5	0	13.05	X3.6305642	AT3G18370	6305975	6310620	+	upstream	-433	232	Upstream
chr3	6397067	6397268	202	*	117	43	0	4.43	X3.6397167	AT3G18570	6395860	6396606	-	upstream	-461	461	Upstream
chr3	6435475	6435676	202	*	132	79.7	0	21.81	X3.6435575	AT3G18710	6434083	6435561	-	overlapStart	86	86	Upstream
chr3	6465487	6465688	202	*	128	70	0	16.25	X3.6465587	AT3G18773	6465825	6467175	+	upstream	-338	137	Upstream
chr3	6479296	6479497	202	*	123	57.8	0	10.24	X3.6479396	AT3G18800	6479688	6480378	+	upstream	-392	191	Upstream
chr3	6521583	6521784	202	*	116	40.9	0	3.81	X3.6521683	AT3G18910	6521719	6523043	+	overlapStart	-136	65	Upstream
chr3	6525844	6526045	202	*	117	41.3	0	4.12	X3.6525944	AT3G18930	6523379	6525543	-	upstream	-301	301	Upstream
chr3	6529339	6529540	202	*	122	55	0	8.93	X3.6529439	AT3G18940	6526958	6529149	-	upstream	-190	190	Upstream
chr3	6542464	6542665	202	*	128	68	0	15.21	X3.6542564	AT3G18960	6542509	6543676	+	overlapStart	-45	45	Upstream
chr3	6545403	6545604	202	*	132	78	0	21.23	X3.6545503	AT3G18970	6543318	6545432	-	overlapStart	29	29	Upstream
chr3	6555582	6555783	202	*	145	109	0	40.8	X3.6555682	AT3G19000	6553529	6555147	-	upstream	-435	435	Upstream
chr3	6575194	6575395	202	*	125	62	0	12.57	X3.6575294	AT3G19040	6567157	6575282	-	overlapStart	88	88	Upstream
chr3	6649918	6650119	202	*	191	222.2	0	142.64	X3.6650018	AT3G19200	6649228	6650077	-	overlapStart	159	42	Upstream
chr3	6748907	6749108	202	*	148	117.3	0	47.43	X3.6749007	AT3G19470	6749485	6751017	+	upstream	-578	377	Upstream
chr3	6758613	6758814	202	*	183	201.2	0	121.43	X3.6758713	AT3G19490	6754615	6758261	-	upstream	-352	352	Upstream
chr3	6761659	6761860	202	*	141	100.3	0	35.18	X3.6761759	AT3G19500	6759016	6760939	-	upstream	-720	720	Upstream
chr3	6805082	6805283	202	*	122	54	0	8.51	X3.6805182	AT3G19590	6805631	6808593	+	upstream	-549	348	Upstream
chr3	6818448	6818649	202	*	118	44.5	0	5.1	X3.6818548	AT3G19620	6815613	6818308	-	upstream	-140	140	Upstream
chr3	6934352	6934553	202	*	115	36.3	0	2.7	X3.6934452	AT3G19930	6934773	6937120	+	upstream	-421	220	Upstream
chr3	6965273	6965474	202	*	220	290.4	0	216.84	X3.6965373	AT3G19990	6965647	6967248	+	upstream	-374	173	Upstream
chr3	7007748	7007949	202	*	139	96	0	31.8	X3.7007848	AT3G20080	7007869	7013694	+	overlapStart	-121	80	Upstream
chr3	7015750	7015951	202	*	122	54	0	8.51	X3.7015850	AT3G20090	7015797	7018360	+	overlapStart	-47	47	Upstream
chr3	7043712	7043913	202	*	119	47.1	0	6.16	X3.7043812	AT3G20180	7043385	7043841	-	overlapStart	129	72	Upstream
chr3	7141255	7141456	202	*	114	34	0	2.2	X3.7141355	AT3G20470	7140440	7141228	-	upstream	-27	27	Upstream
chr3	7161638	7161839	202	*	127	66.8	0	14.58	X3.7161738	AT3G20520	7162828	7165859	+	upstream	-1190	989	Upstream
chr3	7165686	7165887	202	*	125	61	0	11.61	X3.7165786	AT3G20530	7166047	7167929	+	upstream	-361	160	Upstream
chr3	7233124	7233325	202	*	147	114.6	0	45.18	X3.7233224	AT3G20690	7231570	7232682	-	upstream	-442	442	Upstream
chr3	7303742	7303943	202	*	118	45.8	0	5.44	X3.7303842	AT3G20850	7304157	7304561	+	upstream	-415	214	Upstream
chr3	7309336	7309537	202	*	127	67	0	14.58	X3.7309436	AT3G20865	7308504	7308962	-	upstream	-374	374	Upstream
chr3	7315913	7316114	202	*	116	40.2	0	3.81	X3.7316013	AT3G20880	7313538	7315883	-	upstream	-30	30	Upstream
chr3	7323512	7323713	202	*	130	74.6	0	18.96	X3.7323612	AT3G20898	7323683	7324634	+	overlapStart	-171	30	Upstream
chr3	7324632	7324833	202	*	125	61.6	0	12.09	X3.7324732	AT3G20900	7323984	7324670	-	overlapStart	38	38	Upstream
chr3	7339390	7339591	202	*	120	50	0	6.91	X3.7339490	AT3G20940	7339717	7341655	+	upstream	-327	126	Upstream
chr3	7434762	7434963	202	*	123	56.8	0	9.8	X3.7434862	AT3G21190	7432299	7434665	-	upstream	-97	97	Upstream
chr3	7457837	7458038	202	*	182	199.7	0	119.46	X3.7457937	AT3G21240	7454269	7457379	-	upstream	-458	458	Upstream
chr3	7481639	7481840	202	*	120	48.8	0	6.53	X3.7481739	AT3G21290	7482131	7488935	+	upstream	-492	291	Upstream
chr3	7502098	7502299	202	*	134	83	0	23.58	X3.7502198	AT3G21320	7499053	7501841	-	upstream	-257	257	Upstream
chr3	7518228	7518429	202	*	115	37.1	0	2.96	X3.7518328	AT3G21351	7518924	7519477	+	upstream	-696	495	Upstream
chr3	7527727	7527928	202	*	128	69.1	0	16.26	X3.7527827	AT3G21370	7524054	7527652	-	upstream	-75	75	Upstream
chr3	7527727	7527928	202	*	128	69.1	0	16.26	X3.7527827	AT3G21380	7528184	7530677	+	upstream	-457	256	Upstream
chr3	7626915	7627116	202	*	150	121	0	49.7	X3.7627015	AT3G21660	7624495	7626654	-	upstream	-261	261	Upstream
chr3	7807971	7808172	202	*	148	118	0	47.42	X3.7808071	AT3G22142	7803604	7808046	-	overlapStart	75	75	Upstream
chr3	7819181	7819382	202	*	179	192.7	0	112.63	X3.7819281	AT3G22160	7817857	7818985	-	upstream	-196	196	Upstream
chr3	7885554	7885755	202	*	115	37	0	2.7	X3.7885654	AT3G22300	7885668	7886820	+	overlapStart	-114	87	Upstream
chr3	7953034	7953235	202	*	173	176.9	0	97.45	X3.7953134	AT3G22430	7953260	7957884	+	upstream	-226	25	Upstream
chr3	7961841	7962042	202	*	163	153.9	0	76.73	X3.7961941	AT3G22450	7962443	7963378	+	upstream	-602	401	Upstream
chr3	7968526	7968727	202	*	158	141.6	0	66.51	X3.7968626	AT3G22470	7965954	7967990	-	upstream	-536	536	Upstream
chr3	8048678	8048879	202	*	130	73	0	17.86	X3.8048778	AT3G22770	8047684	8048667	-	upstream	-11	11	Upstream
chr3	8048678	8048879	202	*	130	73	0	17.86	X3.8048778	AT3G22780	8048802	8052260	+	overlapStart	-124	77	Upstream
chr3	8088388	8088589	202	*	142	102	0	35.86	X3.8088488	AT3G22850	8089003	8090470	+	upstream	-615	414	Upstream
chr3	8138589	8138790	202	*	128	69	0	15.73	X3.8138689	AT3G22960	8139235	8141985	+	upstream	-646	445	Upstream
chr3	8202771	8202972	202	*	114	35.7	0	2.44	X3.8202871	AT3G23070	8203469	8207419	+	upstream	-698	497	Upstream
chr3	8410254	8410455	202	*	184	203	0	122.42	X3.8410354	AT3G23450	8410433	8412193	+	overlapStart	-179	22	Upstream
chr3	8414031	8414232	202	*	114	36	0	2.44	X3.8414131	AT3G23470	8414710	8418165	+	upstream	-679	478	Upstream
chr3	8477863	8478064	202	*	131	76.7	0	20.08	X3.8477963	AT3G23610	8478122	8479857	+	upstream	-259	58	Upstream
chr3	8498187	8498388	202	*	125	62.1	0	12.57	X3.8498287	AT3G23635	8497941	8498072	-	upstream	-115	115	Upstream
chr3	8501755	8501956	202	*	115	38	0	2.96	X3.8501855	AT3G23640	8501810	8509584	+	overlapStart	-55	55	Upstream
chr3	8607947	8608148	202	*	153	129.9	0	56.73	X3.8608047	AT3G23830	8606477	8608083	-	overlapStart	136	65	Upstream
chr3	8624080	8624281	202	*	121	52	0	7.69	X3.8624180	AT3G23890	8624750	8631327	+	upstream	-670	469	Upstream
chr3	8646666	8646867	202	*	287	451.9	0	999	X3.8646766	AT3G23930	8646892	8647908	+	upstream	-226	25	Upstream
chr3	8725515	8725716	202	*	187	211	0	130.41	X3.8725615	AT3G24160	8726122	8729389	+	upstream	-607	406	Upstream
chr3	8829993	8830194	202	*	170	170	0	91	X3.8830093	AT3G24320	8822979	8829694	-	upstream	-299	299	Upstream
chr3	8829993	8830194	202	*	170	170	0	91	X3.8830093	AT3G24330	8830336	8831838	+	upstream	-343	142	Upstream
chr3	8882214	8882415	202	*	121	52.4	0	8.1	X3.8882314	AT3G24450	8880065	8881722	-	upstream	-492	492	Upstream
chr3	8975207	8975408	202	*	145	109.7	0	41.52	X3.8975307	AT3G24600	8972195	8974867	-	upstream	-340	340	Upstream
chr3	9109446	9109647	202	*	187	212	0	131.42	X3.9109546	AT3G24982	9106000	9108937	-	upstream	-509	509	Upstream
chr3	9151480	9151681	202	*	136	88	0	26.65	X3.9151580	AT3G25120	9149544	9151123	-	upstream	-357	357	Upstream
chr3	9154710	9154911	202	*	174	180	0	100.25	X3.9154810	AT3G25140	9154711	9156845	+	overlapStart	-1	1	Upstream
chr3	9173408	9173609	202	*	147	114	0	44.44	X3.9173508	AT3G25190	9174457	9175776	+	upstream	-1049	848	Upstream
chr3	9184256	9184457	202	*	126	64	0	13.05	X3.9184356	AT3G25221	9184688	9184792	+	upstream	-432	231	Upstream
chr3	9204923	9205124	202	*	119	46	0	5.44	X3.9205023	AT3G25270	9203934	9204965	-	overlapStart	42	42	Upstream
chr3	9255042	9255243	202	*	123	57.3	0	10.24	X3.9255142	AT3G25500	9251093	9255002	-	upstream	-40	40	Upstream
chr3	9269129	9269330	202	*	140	97	0	32.47	X3.9269229	AT3G25510	9260838	9268797	-	upstream	-332	332	Upstream
chr3	9273520	9273721	202	*	127	66.4	0	14.58	X3.9273620	AT3G25530	9271800	9273615	-	overlapStart	95	95	Upstream
chr3	9518758	9518959	202	*	116	39.8	0	3.52	X3.9518858	AT3G26040	9519741	9521070	+	upstream	-983	782	Upstream
chr3	9524345	9524546	202	*	126	63.6	0	13.05	X3.9524445	AT3G26060	9524725	9526407	+	upstream	-380	179	Upstream
chr3	9526442	9526643	202	*	120	50.7	0	7.3	X3.9526542	AT3G26070	9526714	9528583	+	upstream	-272	71	Upstream
chr3	9530059	9530260	202	*	128	69	0	15.73	X3.9530159	AT3G26085	9530595	9532613	+	upstream	-536	335	Upstream
chr3	9565683	9565884	202	*	114	35.5	0	2.44	X3.9565783	AT3G26147	9565083	9565250	-	upstream	-433	433	Upstream
chr3	9570348	9570549	202	*	126	64	0	13.05	X3.9570448	AT3G26160	9568280	9569886	-	upstream	-462	462	Upstream
chr3	9600331	9600532	202	*	122	55.5	0	9.36	X3.9600431	AT3G26230	9598005	9599959	-	upstream	-372	372	Upstream
chr3	9601378	9601579	202	*	129	72	0	17.32	X3.9601478	AT3G26235	9602005	9602773	+	upstream	-627	426	Upstream
chr3	9634425	9634626	202	*	114	36	0	2.44	X3.9634525	AT3G26290	9632682	9634470	-	overlapStart	45	45	Upstream
chr3	9655063	9655264	202	*	117	43	0	4.76	X3.9655163	AT3G26350	9653660	9654730	-	upstream	-333	333	Upstream
chr3	9758194	9758395	202	*	115	37.4	0	2.96	X3.9758294	AT3G26580	9758887	9760544	+	upstream	-693	492	Upstream
chr3	9812181	9812382	202	*	141	99.6	0	34.49	X3.9812281	AT3G26710	9813371	9814750	+	upstream	-1190	989	Upstream
chr3	9827255	9827456	202	*	124	59	0	10.69	X3.9827355	AT3G26740	9827801	9828680	+	upstream	-546	345	Upstream
chr3	9842045	9842246	202	*	122	54.7	0	8.93	X3.9842145	AT3G26750	9839976	9842079	-	overlapStart	34	34	Upstream
chr3	9844972	9845173	202	*	116	38.9	0	3.23	X3.9845072	AT3G26770	9845396	9847148	+	upstream	-424	223	Upstream
chr3	9856060	9856261	202	*	115	36.6	0	2.7	X3.9856160	AT3G26790	9853828	9855989	-	upstream	-71	71	Upstream
chr3	9920190	9920391	202	*	114	35.8	0	2.44	X3.9920290	AT3G26920	9920435	9922612	+	upstream	-245	44	Upstream
chr3	9945758	9945959	202	*	191	220	0	140.58	X3.9945858	AT3G26960	9944668	9945579	-	upstream	-179	179	Upstream
chr3	9959106	9959307	202	*	116	39	0	3.23	X3.9959206	AT3G27010	9957376	9958898	-	upstream	-208	208	Upstream
chr3	9971725	9971926	202	*	123	55.7	0	9.36	X3.9971825	AT3G27027	9971921	9972130	+	overlapStart	-196	5	Upstream
chr3	9984949	9985150	202	*	128	68.1	0	15.73	X3.9985049	AT3G27070	9982987	9984744	-	upstream	-205	205	Upstream
chr3	10003616	10003817	202	*	150	122	0	50.47	X3.10003716	AT3G27120	9999694	10003314	-	upstream	-302	302	Upstream
chr3	10059171	10059372	202	*	134	84	0	24.19	X3.10059271	AT3G27240	10055789	10058716	-	upstream	-455	455	Upstream
chr3	10067172	10067373	202	*	127	66	0	14.06	X3.10067272	AT3G27260	10067529	10072672	+	upstream	-357	156	Upstream
chr3	10072806	10073007	202	*	116	38.7	0	3.23	X3.10072906	AT3G27270	10073280	10074160	+	upstream	-474	273	Upstream
chr3	10255657	10255858	202	*	129	72.1	0	17.86	X3.10255757	AT3G27690	10255947	10257011	+	upstream	-290	89	Upstream
chr3	10324146	10324347	202	*	137	91	0	28.54	X3.10324246	AT3G27850	10324839	10325713	+	upstream	-693	492	Upstream
chr3	10330749	10330950	202	*	135	85.1	0	25.41	X3.10330849	AT3G27870	10330950	10335305	+	overlapStart	-201	0	Upstream
chr3	10372893	10373094	202	*	148	116	0	45.92	X3.10372993	AT3G27930	10369299	10372441	-	upstream	-452	452	Upstream
chr3	10372893	10373094	202	*	148	116	0	45.92	X3.10372993	AT3G27940	10373251	10376461	+	upstream	-358	157	Upstream
chr3	10434880	10435081	202	*	121	51	0	7.3	X3.10434980	AT3G28040	10435057	10438391	+	overlapStart	-177	24	Upstream
chr3	10469808	10470009	202	*	114	34.7	0	2.2	X3.10469908	AT3G28140	10470401	10471388	+	upstream	-593	392	Upstream
chr3	10497758	10497959	202	*	122	55.5	0	9.36	X3.10497858	AT3G28170	10498361	10500360	+	upstream	-603	402	Upstream
chr3	10671362	10671563	202	*	131	75	0	13.15	X3.10671462	AT3G28455	10669888	10671163	-	upstream	-199	199	Upstream
chr3	10674767	10674968	202	*	123	55.9	0	9.36	X3.10674867	AT3G28460	10672041	10674395	-	upstream	-372	372	Upstream
chr3	10675875	10676076	202	*	115	37	0	2.7	X3.10675975	AT3G28470	10674508	10675724	-	upstream	-151	151	Upstream
chr3	10747846	10748047	202	*	114	35	0	2.2	X3.10747946	AT3G28674	10747818	10747994	-	overlapStart	148	28	Upstream
chr3	10793284	10793485	202	*	149	119	0	48.18	X3.10793384	AT3G28750	10791591	10792844	-	upstream	-440	440	Upstream
chr3	10830523	10830724	202	*	116	39.8	0	3.52	X3.10830623	AT3G28830	10831168	10833284	+	upstream	-645	444	Upstream
chr3	10982219	10982420	202	*	121	53	0	8.1	X3.10982319	AT3G28956	10980700	10982244	-	overlapStart	25	25	Upstream
chr3	10982219	10982420	202	*	121	53	0	8.1	X3.10982319	AT3G28958	10982706	10983532	+	upstream	-487	286	Upstream
chr3	11157087	11157288	202	*	180	195	0	114.57	X3.11157187	AT3G29185	11154929	11157226	-	overlapStart	139	62	Upstream
chr3	11163370	11163571	202	*	122	53.2	0	8.51	X3.11163470	AT3G29190	11159373	11163336	-	upstream	-34	34	Upstream
chr3	11246937	11247138	202	*	233	322.9	0	254.26	X3.11247037	AT3G29300	11247011	11247652	+	overlapStart	-74	74	Upstream
chr3	11252685	11252886	202	*	247	356.9	0	295.57	X3.11252785	AT3G29320	11252807	11257814	+	overlapStart	-122	79	Upstream
chr3	11305039	11305240	202	*	115	38	0	2.96	X3.11305139	AT3G29410	11302431	11305136	-	overlapStart	97	97	Upstream
chr3	11400083	11400284	202	*	133	82	0	22.99	X3.11400183	AT3G29590	11398917	11400266	-	overlapStart	183	18	Upstream
chr3	11448608	11448809	202	*	119	48	0	6.16	X3.11448708	AT3G29630	11447028	11448609	-	overlapStart	1	1	Upstream
chr3	11956197	11956398	202	*	118	44	0	4.76	X3.11956297	AT3G30340	11956601	11959098	+	upstream	-404	203	Upstream
chr3	12357888	12358089	202	*	124	60	0	11.15	X3.12357988	AT3G30730	12357396	12357599	-	upstream	-289	289	Upstream
chr3	2099527	2099728	202	*	124	58	0	10.24	X3.2099627	AT3G36659	2100189	2100983	+	upstream	-662	461	Upstream
chr3	14308800	14309001	202	*	148	116	0	45.92	X3.14308900	AT3G42150	14309314	14311638	+	upstream	-514	313	Upstream
chr3	14329065	14329266	202	*	115	37	0	2.7	X3.14329165	AT3G42180	14324274	14328676	-	upstream	-389	389	Upstream
chr3	14509115	14509316	202	*	114	35.7	0	2.44	X3.14509215	AT3G42385	14509500	14509760	+	upstream	-385	184	Upstream
chr3	15183890	15184091	202	*	114	34.4	0	2.2	X3.15183990	AT3G43190	15179020	15183989	-	overlapStart	99	99	Upstream
chr3	15765750	15765951	202	*	115	37.8	0	2.96	X3.15765850	AT3G43950	15766361	15767014	+	upstream	-611	410	Upstream
chr3	16123544	16123745	202	*	119	47	0	5.79	X3.16123644	AT3G44540	16124021	16127954	+	upstream	-477	276	Upstream
chr3	16195214	16195415	202	*	145	109.8	0	41.52	X3.16195314	AT3G44630	16195955	16201225	+	upstream	-741	540	Upstream
chr3	16237909	16238110	202	*	126	65	0	13.54	X3.16238009	AT3G44700	16236343	16237736	-	upstream	-173	173	Upstream
chr3	16328616	16328817	202	*	144	108	0	40.08	X3.16328716	AT3G44785	16328221	16328448	-	upstream	-168	168	Upstream
chr3	16328616	16328817	202	*	144	108	0	40.08	X3.16328716	AT3G44790	16328792	16330265	+	overlapStart	-176	25	Upstream
chr3	16343168	16343369	202	*	136	88	0	26.65	X3.16343268	AT3G44800	16343333	16346027	+	overlapStart	-165	36	Upstream
chr3	16349848	16350049	202	*	116	39.7	0	3.52	X3.16349948	AT3G44805	16350395	16351437	+	upstream	-547	346	Upstream
chr3	16368433	16368634	202	*	119	48.1	0	6.53	X3.16368533	AT3G44830	16368890	16372356	+	upstream	-457	256	Upstream
chr3	16448587	16448788	202	*	174	181.1	0	102.13	X3.16448687	AT3G44990	16446975	16448764	-	overlapStart	177	24	Upstream
chr3	16476248	16476449	202	*	138	93.2	0	30.49	X3.16476348	AT3G45040	16472662	16475753	-	upstream	-495	495	Upstream
chr3	16761899	16762100	202	*	118	44	0	4.76	X3.16761999	AT3G45660	16762205	16764241	+	upstream	-306	105	Upstream
chr3	16770594	16770795	202	*	127	67.6	0	15.22	X3.16770694	AT3G45680	16770933	16773030	+	upstream	-339	138	Upstream
chr3	16789643	16789844	202	*	116	40.1	0	3.81	X3.16789743	AT3G45730	16789980	16790582	+	upstream	-337	136	Upstream
chr3	16871809	16872010	202	*	124	59.6	0	11.15	X3.16871909	AT3G45880	16868914	16871548	-	upstream	-261	261	Upstream
chr3	16957130	16957331	202	*	137	91	0	28.54	X3.16957230	AT3G46180	16954365	16956833	-	upstream	-297	297	Upstream
chr3	17016876	17017077	202	*	114	35	0	2.2	X3.17016976	AT3G46300	17015777	17016746	-	upstream	-130	130	Upstream
chr3	17035885	17036086	202	*	115	38	0	2.96	X3.17035985	AT3G46350	17036427	17041680	+	upstream	-542	341	Upstream
chr3	17051801	17052002	202	*	121	52	0	7.69	X3.17051901	AT3G46370	17051955	17055514	+	overlapStart	-154	47	Upstream
chr3	17114998	17115199	202	*	131	75	0	18.96	X3.17115098	AT3G46490	17115629	17119451	+	upstream	-631	430	Upstream
chr3	17135846	17136047	202	*	237	332.2	0	266.26	X3.17135946	AT3G46540	17134091	17135587	-	upstream	-259	259	Upstream
chr3	17137863	17138064	202	*	126	65	0	13.54	X3.17137963	AT3G46550	17136456	17137874	-	overlapStart	11	11	Upstream
chr3	17187675	17187876	202	*	119	48	0	6.16	X3.17187775	AT3G46650	17185453	17187812	-	overlapStart	137	64	Upstream
chr3	17192241	17192442	202	*	119	46	0	5.44	X3.17192341	AT3G46666	17191598	17191893	-	upstream	-348	348	Upstream
chr3	17201714	17201915	202	*	131	76	0	19.52	X3.17201814	AT3G46700	17200301	17201889	-	overlapStart	175	26	Upstream
chr3	17219383	17219584	202	*	114	35	0	2.2	X3.17219483	AT3G46740	17215813	17219343	-	upstream	-40	40	Upstream
chr3	17219383	17219584	202	*	114	35	0	2.2	X3.17219483	AT3G46750	17219741	17221638	+	upstream	-358	157	Upstream
chr3	17319453	17319654	202	*	145	109	0	40.8	X3.17319553	AT3G47010	17316649	17319531	-	overlapStart	78	78	Upstream
chr3	17338131	17338332	202	*	114	34.8	0	2.2	X3.17338231	AT3G47070	17337065	17337733	-	upstream	-398	398	Upstream
chr3	17458644	17458845	202	*	151	124	0	52.01	X3.17458744	AT3G47390	17459339	17464716	+	upstream	-695	494	Upstream
chr3	17629328	17629529	202	*	127	66.9	0	14.58	X3.17629428	AT3G47790	17629530	17633911	+	upstream	-202	1	Upstream
chr3	17646464	17646665	202	*	120	49	0	6.53	X3.17646564	AT3G47830	17647069	17648346	+	upstream	-605	404	Upstream
chr3	17748990	17749191	202	*	157	140	0	64.85	X3.17749090	AT3G48060	17743114	17748736	-	upstream	-254	254	Upstream
chr3	17797212	17797413	202	*	184	204	0	123.41	X3.17797312	AT3G48190	17797334	17828591	+	overlapStart	-122	79	Upstream
chr3	17885576	17885777	202	*	120	50.5	0	7.3	X3.17885676	AT3G48298	17885542	17885667	-	overlapStart	91	34	Upstream
chr3	17890494	17890695	202	*	135	86	0	25.41	X3.17890594	AT3G48320	17891134	17892847	+	upstream	-640	439	Upstream
chr3	17976983	17977184	202	*	124	60	0	11.15	X3.17977083	AT3G48520	17974977	17976670	-	upstream	-313	313	Upstream
chr3	18011735	18011936	202	*	130	73.6	0	18.41	X3.18011835	AT3G48600	18010093	18011440	-	upstream	-295	295	Upstream
chr3	18015531	18015732	202	*	127	65.8	0	14.06	X3.18015631	AT3G48620	18015983	18017810	+	upstream	-452	251	Upstream
chr3	18030340	18030541	202	*	222	294.9	0	221.43	X3.18030440	AT3G48670	18030781	18034065	+	upstream	-441	240	Upstream
chr3	18040374	18040575	202	*	117	43	0	4.43	X3.18040474	AT3G48700	18038648	18039876	-	upstream	-498	498	Upstream
chr3	18040374	18040575	202	*	117	43	0	4.43	X3.18040474	AT3G48710	18040937	18044226	+	upstream	-563	362	Upstream
chr3	18096752	18096953	202	*	122	54	0	8.51	X3.18096852	AT3G48800	18095825	18096661	-	upstream	-91	91	Upstream
chr3	18096752	18096953	202	*	122	54	0	8.51	X3.18096852	AT3G48810	18097048	18099721	+	upstream	-296	95	Upstream
chr3	18116605	18116806	202	*	138	94	0	30.49	X3.18116705	AT3G48850	18114526	18116499	-	upstream	-106	106	Upstream
chr3	18249665	18249866	202	*	126	63	0	12.57	X3.18249765	AT3G49220	18249776	18253839	+	overlapStart	-111	90	Upstream
chr3	18328771	18328972	202	*	117	42	0	4.12	X3.18328871	AT3G49420	18329387	18331431	+	upstream	-616	415	Upstream
chr3	18353372	18353573	202	*	131	74.9	0	18.96	X3.18353472	AT3G49510	18353842	18356508	+	upstream	-470	269	Upstream
chr3	18389762	18389963	202	*	141	101.3	0	35.86	X3.18389862	AT3G49601	18387302	18389564	-	upstream	-198	198	Upstream
chr3	18403292	18403493	202	*	133	79.7	0	21.81	X3.18403392	AT3G49640	18400306	18402869	-	upstream	-423	423	Upstream
chr3	18405085	18405286	202	*	124	60.2	0	11.62	X3.18405185	AT3G49645	18403002	18404788	-	upstream	-297	297	Upstream
chr3	18436167	18436368	202	*	117	43	0	4.43	X3.18436267	AT3G49700	18434470	18436141	-	upstream	-26	26	Upstream
chr3	18447865	18448066	202	*	116	40.9	0	3.81	X3.18447965	AT3G49730	18445730	18447646	-	upstream	-219	219	Upstream
chr3	18486671	18486872	202	*	123	57	0	9.8	X3.18486771	AT3G49845	18487258	18488298	+	upstream	-587	386	Upstream
chr3	18510038	18510239	202	*	146	111.1	0	42.97	X3.18510138	AT3G49930	18510246	18510963	+	upstream	-208	7	Upstream
chr3	18603940	18604141	202	*	116	41	0	3.81	X3.18604040	AT3G50170	18601755	18603793	-	upstream	-147	147	Upstream
chr3	18616640	18616841	202	*	117	43.2	0	4.76	X3.18616740	AT3G50210	18614170	18616452	-	upstream	-188	188	Upstream
chr3	18787386	18787587	202	*	115	37	0	2.7	X3.18787486	AT3G50620	18784695	18786914	-	upstream	-472	472	Upstream
chr3	18849393	18849594	202	*	171	172	0	92.83	X3.18849493	AT3G50720	18847519	18849430	-	overlapStart	37	37	Upstream
chr3	18853078	18853279	202	*	123	57	0	9.8	X3.18853178	AT3G50730	18851533	18853137	-	overlapStart	59	59	Upstream
chr3	18910961	18911162	202	*	114	34.6	0	2.2	X3.18911061	AT3G50870	18910990	18912608	+	overlapStart	-29	29	Upstream
chr3	18915807	18916008	202	*	115	38	0	2.96	X3.18915907	AT3G50890	18916166	18917328	+	upstream	-359	158	Upstream
chr3	18934987	18935188	202	*	116	39.4	0	3.52	X3.18935087	AT3G50950	18935674	18938799	+	upstream	-687	486	Upstream
chr3	18952301	18952502	202	*	127	66.6	0	14.58	X3.18952401	AT3G51030	18950996	18952050	-	upstream	-251	251	Upstream
chr3	19036451	19036652	202	*	192	224	0	143.67	X3.19036551	AT3G51280	19037140	19038951	+	upstream	-689	488	Upstream
chr3	19042579	19042780	202	*	134	83.5	0	24.19	X3.19042679	AT3G51300	19042887	19044372	+	upstream	-308	107	Upstream
chr3	19074949	19075150	202	*	117	43.3	0	4.76	X3.19075049	AT3G51390	19075576	19078120	+	upstream	-627	426	Upstream
chr3	19085836	19086037	202	*	115	38	0	2.96	X3.19085936	AT3G51430	19086452	19088110	+	upstream	-616	415	Upstream
chr3	19188980	19189181	202	*	185	207	0	126.4	X3.19189080	AT3G51740	19189049	19192051	+	overlapStart	-69	69	Upstream
chr3	19213878	19214079	202	*	114	35	0	2.2	X3.19213978	AT3G51800	19211027	19213776	-	upstream	-102	102	Upstream
chr3	19218895	19219096	202	*	117	42.8	0	4.43	X3.19218995	AT3G51820	19216003	19219057	-	overlapStart	162	39	Upstream
chr3	19243689	19243890	202	*	118	43.8	0	4.76	X3.19243789	AT3G51870	19243950	19246936	+	upstream	-261	60	Upstream
chr3	19249613	19249814	202	*	178	190	0	109.74	X3.19249713	AT3G51880	19246984	19249124	-	upstream	-489	489	Upstream
chr3	19314371	19314572	202	*	138	92.5	0	29.83	X3.19314471	AT3G52080	19315043	19317843	+	upstream	-672	471	Upstream
chr3	19341736	19341937	202	*	131	76.6	0	20.08	X3.19341836	AT3G52150	19342024	19343466	+	upstream	-288	87	Upstream
chr3	19349727	19349928	202	*	141	100.8	0	20.43	X3.19349827	AT3G52170	19346752	19349533	-	upstream	-194	194	Upstream
chr3	19387017	19387218	202	*	127	65.4	0	14.06	X3.19387117	AT3G52260	19383266	19386553	-	upstream	-464	464	Upstream
chr3	19459289	19459490	202	*	144	107	0	39.37	X3.19459389	AT3G52490	19455699	19458919	-	upstream	-370	370	Upstream
chr3	19553415	19553616	202	*	116	39.6	0	3.52	X3.19553515	AT3G52750	19549661	19553014	-	upstream	-401	401	Upstream
chr3	19554879	19555080	202	*	125	62	0	12.09	X3.19554979	AT3G52760	19553679	19554812	-	upstream	-67	67	Upstream
chr3	19678771	19678972	202	*	132	79	0	21.23	X3.19678871	AT3G53090	19679208	19685360	+	upstream	-437	236	Upstream
chr3	19713913	19714114	202	*	207	260.6	0	183.13	X3.19714013	AT3G53190	19713928	19717595	+	overlapStart	-15	15	Upstream
chr3	19719813	19720014	202	*	117	42.8	0	4.44	X3.19719913	AT3G53200	19718282	19719462	-	upstream	-351	351	Upstream
chr3	19719813	19720014	202	*	117	42.8	0	4.44	X3.19719913	AT3G53210	19720165	19721875	+	upstream	-352	151	Upstream
chr3	19731589	19731790	202	*	158	140.7	0	65.68	X3.19731689	AT3G53232	19730978	19731423	-	upstream	-166	166	Upstream
chr3	19821973	19822174	202	*	220	290.6	0	216.84	X3.19822073	AT3G53460	19819185	19821519	-	upstream	-454	454	Upstream
chr3	19844958	19845159	202	*	169	167	0	88.27	X3.19845058	AT3G53530	19845097	19846820	+	overlapStart	-139	62	Upstream
chr3	20024939	20025140	202	*	287	452.6	0	999	X3.20025039	AT3G54080	20025267	20027022	+	upstream	-328	127	Upstream
chr3	20111177	20111378	202	*	124	59.4	0	11.15	X3.20111277	AT3G54300	20108208	20110683	-	upstream	-494	494	Upstream
chr3	20139475	20139676	202	*	144	106.6	0	39.37	X3.20139575	AT3G54390	20137741	20139142	-	upstream	-333	333	Upstream
chr3	20142575	20142776	202	*	205	255	0	176.57	X3.20142675	AT3G54400	20140058	20142642	-	overlapStart	67	67	Upstream
chr3	20187831	20188032	202	*	123	56.2	0	9.8	X3.20187931	AT3G54530	20185966	20187637	-	upstream	-194	194	Upstream
chr3	20220688	20220889	202	*	124	59	0	10.69	X3.20220788	AT3G54620	20217854	20220438	-	upstream	-250	250	Upstream
chr3	20258012	20258213	202	*	122	55	0	9.36	X3.20258112	AT3G54720	20254725	20257848	-	upstream	-164	164	Upstream
chr3	20261705	20261906	202	*	119	47	0	5.79	X3.20261805	AT3G54740	20262391	20264601	+	upstream	-686	485	Upstream
chr3	20272933	20273134	202	*	331	560	0	999	X3.20273033	AT3G54760	20269080	20272457	-	upstream	-476	476	Upstream
chr3	20345201	20345402	202	*	154	132.7	0	59.13	X3.20345301	AT3G54910	20342756	20344806	-	upstream	-395	395	Upstream
chr3	20344412	20344613	202	*	117	41.4	0	4.12	X3.20344512	AT3G54920	20345082	20348582	+	upstream	-670	469	Upstream
chr3	20376859	20377060	202	*	116	41	0	3.81	X3.20376959	AT3G54990	20373718	20376522	-	upstream	-337	337	Upstream
chr3	20380547	20380748	202	*	132	79.6	0	21.81	X3.20380647	AT3G55000	20381508	20383789	+	upstream	-961	760	Upstream
chr3	20427618	20427819	202	*	131	77	0	20.08	X3.20427718	AT3G55110	20424550	20427377	-	upstream	-241	241	Upstream
chr3	20453303	20453504	202	*	118	44	0	4.76	X3.20453403	AT3G55160	20445412	20452400	-	upstream	-903	903	Upstream
chr3	20593261	20593462	202	*	118	44	0	4.76	X3.20593361	AT3G55520	20593661	20595345	+	upstream	-400	199	Upstream
chr3	20666643	20666844	202	*	147	114.9	0	45.18	X3.20666743	AT3G55680	20665685	20666315	-	upstream	-328	328	Upstream
chr3	20666643	20666844	202	*	147	114.9	0	45.18	X3.20666743	AT3G55690	20666972	20668505	+	upstream	-329	128	Upstream
chr3	20705346	20705547	202	*	134	84.4	0	24.79	X3.20705446	AT3G55780	20705627	20707021	+	upstream	-281	80	Upstream
chr3	20819808	20820009	202	*	119	46	0	5.44	X3.20819908	AT3G56100	20816931	20819517	-	upstream	-291	291	Upstream
chr3	20869074	20869275	202	*	126	65	0	13.54	X3.20869174	AT3G56260	20867970	20869024	-	upstream	-50	50	Upstream
chr3	20940921	20941122	202	*	119	46.2	0	5.79	X3.20941021	AT3G56490	20941502	20943469	+	upstream	-581	380	Upstream
chr3	20950212	20950413	202	*	123	57	0	9.8	X3.20950312	AT3G56540	20950823	20951892	+	upstream	-611	410	Upstream
chr3	20964640	20964841	202	*	114	34.7	0	2.2	X3.20964740	AT3G56590	20964857	20968019	+	upstream	-217	16	Upstream
chr3	20981103	20981304	202	*	124	59	0	10.69	X3.20981203	AT3G56640	20981381	20984336	+	upstream	-278	77	Upstream
chr3	21080171	21080372	202	*	116	39	0	3.52	X3.21080271	AT3G56950	21078297	21079856	-	upstream	-315	315	Upstream
chr3	21103133	21103334	202	*	153	128	0	55.14	X3.21103233	AT3G57030	21101457	21103293	-	overlapStart	160	41	Upstream
chr3	21224853	21225054	202	*	120	49	0	6.53	X3.21224953	AT3G57360	21225540	21226692	+	upstream	-687	486	Upstream
chr3	21255577	21255778	202	*	117	42	0	4.12	X3.21255677	AT3G57420	21252419	21255276	-	upstream	-301	301	Upstream
chr3	21275917	21276118	202	*	118	43.6	0	4.76	X3.21276017	AT3G57470	21269261	21276013	-	overlapStart	96	96	Upstream
chr3	21322256	21322457	202	*	125	62.1	0	12.57	X3.21322356	AT3G57580	21320491	21322379	-	overlapStart	123	78	Upstream
chr3	21391488	21391689	202	*	123	57	0	9.8	X3.21391588	AT3G57730	21389964	21391562	-	overlapStart	74	74	Upstream
chr3	21395191	21395392	202	*	115	37.1	0	2.96	X3.21395291	AT3G57760	21395593	21397244	+	upstream	-402	201	Upstream
chr3	21402952	21403153	202	*	151	124	0	52.02	X3.21403052	AT3G57780	21399766	21402899	-	upstream	-53	53	Upstream
chr3	21464613	21464814	202	*	135	85.9	0	25.41	X3.21464713	AT3G57970	21465226	21466677	+	upstream	-613	412	Upstream
chr3	21478866	21479067	202	*	155	134.7	0	60.75	X3.21478966	AT3G58020	21479480	21481349	+	upstream	-614	413	Upstream
chr3	21561371	21561572	202	*	175	182.9	0	103.07	X3.21561471	AT3G58200	21559893	21561465	-	overlapStart	94	94	Upstream
chr3	21564170	21564371	202	*	119	46.4	0	5.79	X3.21564270	AT3G58210	21562442	21564067	-	upstream	-103	103	Upstream
chr3	21566364	21566565	202	*	115	38.4	0	3.23	X3.21566464	AT3G58220	21564450	21566482	-	overlapStart	118	83	Upstream
chr3	21613330	21613531	202	*	143	104	0	37.25	X3.21613430	AT3G58420	21609307	21612409	-	upstream	-921	921	Upstream
chr3	21709053	21709254	202	*	190	219	0	138.53	X3.21709153	AT3G58690	21709170	21711381	+	overlapStart	-117	84	Upstream
chr3	21711044	21711245	202	*	163	153.8	0	76.73	X3.21711144	AT3G58700	21711563	21712955	+	upstream	-519	318	Upstream
chr3	21732090	21732291	202	*	114	34.1	0	2.2	X3.21732190	AT3G58770	21732258	21735327	+	overlapStart	-168	33	Upstream
chr3	21752489	21752690	202	*	115	37.7	0	2.96	X3.21752589	AT3G58820	21752533	21754615	+	overlapStart	-44	44	Upstream
chr3	21783588	21783789	202	*	182	198.8	0	118.48	X3.21783688	AT3G58940	21780785	21783663	-	overlapStart	75	75	Upstream
chr3	21791695	21791896	202	*	128	68.1	0	15.73	X3.21791795	AT3G58970	21789332	21791359	-	upstream	-336	336	Upstream
chr3	21869057	21869258	202	*	129	71.9	0	17.32	X3.21869157	AT3G59140	21863420	21868701	-	upstream	-356	356	Upstream
chr3	21884073	21884274	202	*	142	101.9	0	35.86	X3.21884173	AT3G59190	21884527	21886776	+	upstream	-454	253	Upstream
chr3	21918033	21918234	202	*	131	77	0	20.08	X3.21918133	AT3G59300	21918455	21922706	+	upstream	-422	221	Upstream
chr3	21924243	21924444	202	*	229	312	0	241.23	X3.21924343	AT3G59310	21921746	21924415	-	overlapStart	172	29	Upstream
chr3	21927160	21927361	202	*	155	134.7	0	60.75	X3.21927260	AT3G59320	21924517	21926886	-	upstream	-274	274	Upstream
chr3	21928346	21928547	202	*	165	157	0	79.36	X3.21928446	AT3G59330	21926961	21928499	-	overlapStart	153	48	Upstream
chr3	21940348	21940549	202	*	126	64	0	13.05	X3.21940448	AT3G59360	21935279	21940250	-	upstream	-98	98	Upstream
chr3	21989530	21989731	202	*	126	64.6	0	13.54	X3.21989630	AT3G59510	21988453	21989712	-	overlapStart	182	19	Upstream
chr3	21992746	21992947	202	*	157	140	0	64.85	X3.21992846	AT3G59530	21993253	21995308	+	upstream	-507	306	Upstream
chr3	22065768	22065969	202	*	122	54	0	8.51	X3.22065868	AT3G59730	22064308	22065879	-	overlapStart	111	90	Upstream
chr3	22071710	22071911	202	*	122	54	0	8.51	X3.22071810	AT3G59750	22069855	22071821	-	overlapStart	111	90	Upstream
chr3	22092263	22092464	202	*	174	180	0	100.25	X3.22092363	AT3G59790	22092448	22094240	+	overlapStart	-185	16	Upstream
chr3	22107921	22108122	202	*	124	59	0	10.69	X3.22108021	AT3G59845	22106243	22107924	-	overlapStart	3	3	Upstream
chr3	22295274	22295475	202	*	203	249	0	170.06	X3.22295374	AT3G60320	22291886	22295371	-	overlapStart	97	97	Upstream
chr3	22348519	22348720	202	*	118	45	0	5.09	X3.22348619	AT3G60480	22347451	22348239	-	upstream	-280	280	Upstream
chr3	22373163	22373364	202	*	143	105.1	0	38.66	X3.22373263	AT3G60530	22373215	22374387	+	overlapStart	-52	52	Upstream
chr3	22419729	22419930	202	*	143	106	0	38.66	X3.22419829	AT3G60650	22419951	22420274	+	upstream	-222	21	Upstream
chr3	22426408	22426609	202	*	156	136.1	0	62.38	X3.22426508	AT3G60670	22424512	22426288	-	upstream	-120	120	Upstream
chr3	22474115	22474316	202	*	128	69	0	15.73	X3.22474215	AT3G60820	22471769	22473971	-	upstream	-144	144	Upstream
chr3	22473394	22473595	202	*	139	96	0	31.8	X3.22473494	AT3G60830	22474074	22476445	+	upstream	-680	479	Upstream
chr3	22497646	22497847	202	*	143	104.2	0	37.95	X3.22497746	AT3G60890	22497024	22497475	-	upstream	-171	171	Upstream
chr3	22501182	22501383	202	*	114	35.7	0	2.44	X3.22501282	AT3G60900	22499360	22501239	-	overlapStart	57	57	Upstream
chr3	22501182	22501383	202	*	114	35.7	0	2.44	X3.22501282	AT3G60910	22501698	22503372	+	upstream	-516	315	Upstream
chr3	22513304	22513505	202	*	124	60	0	11.15	X3.22513404	AT3G60920	22503328	22513031	-	upstream	-273	273	Upstream
chr3	22593659	22593860	202	*	128	68	0	15.22	X3.22593759	AT3G61035	22592252	22593649	-	upstream	-10	10	Upstream
chr3	22607321	22607522	202	*	118	43.7	0	4.76	X3.22607421	AT3G61070	22604094	22606878	-	upstream	-443	443	Upstream
chr3	22615289	22615490	202	*	116	41	0	3.81	X3.22615389	AT3G61113	22614582	22615415	-	overlapStart	126	75	Upstream
chr3	22693138	22693339	202	*	139	94.8	0	31.14	X3.22693238	AT3G61310	22690596	22692834	-	upstream	-304	304	Upstream
chr3	22718347	22718548	202	*	143	106	0	38.66	X3.22718447	AT3G61400	22718956	22720397	+	upstream	-609	408	Upstream
chr3	22734592	22734793	202	*	256	379.2	0	999	X3.22734692	AT3G61440	22735663	22738126	+	upstream	-1071	870	Upstream
chr3	22776129	22776330	202	*	128	70	0	16.25	X3.22776229	AT3G61550	22776401	22777225	+	upstream	-272	71	Upstream
chr3	22818371	22818572	202	*	115	37.5	0	2.96	X3.22818471	AT3G61670	22818589	22822020	+	upstream	-218	17	Upstream
chr3	22859613	22859814	202	*	139	96	0	31.8	X3.22859713	AT3G61750	22857897	22859254	-	upstream	-359	359	Upstream
chr3	22939400	22939601	202	*	218	286	0	211.12	X3.22939500	AT3G61950	22939546	22941451	+	overlapStart	-146	55	Upstream
chr3	22984408	22984609	202	*	114	35	0	2.2	X3.22984508	AT3G62070	22983138	22984513	-	overlapStart	105	96	Upstream
chr3	23062249	23062450	202	*	149	119	0	48.18	X3.23062349	AT3G62320	23061805	23062398	-	overlapStart	149	52	Upstream
chr3	23080129	23080330	202	*	118	44.4	0	5.1	X3.23080229	AT3G62370	23080759	23083282	+	upstream	-630	429	Upstream
chr3	23146189	23146390	202	*	167	163	0	84.67	X3.23146289	AT3G62580	23146828	23147951	+	upstream	-639	438	Upstream
chr3	23154622	23154823	202	*	124	58	0	10.24	X3.23154722	AT3G62610	23154758	23156585	+	overlapStart	-136	65	Upstream
chr3	23196015	23196216	202	*	116	40	0	3.52	X3.23196115	AT3G62700	23190267	23195762	-	upstream	-253	253	Upstream
chr3	23200887	23201088	202	*	128	69.9	0	16.25	X3.23200987	AT3G62710	23197658	23200635	-	upstream	-252	252	Upstream
chr3	23211234	23211435	202	*	128	67.7	0	15.22	X3.23211334	AT3G62740	23211416	23213888	+	overlapStart	-182	19	Upstream
chr3	23261793	23261994	202	*	117	43.2	0	4.76	X3.23261893	AT3G62930	23261442	23261927	-	overlapStart	134	67	Upstream
chr3	23283327	23283528	202	*	137	90.3	0	28.55	X3.23283427	AT3G63000	23283609	23285540	+	upstream	-282	81	Upstream
chr3	23345804	23346005	202	*	114	35.9	0	2.44	X3.23345904	AT3G63200	23345902	23347564	+	overlapStart	-98	98	Upstream
chr3	23381582	23381783	202	*	119	46.6	0	5.79	X3.23381682	AT3G63290	23381645	23383538	+	overlapStart	-63	63	Upstream
chr3	23389432	23389633	202	*	181	198	0	117.5	X3.23389532	AT3G63310	23387856	23388985	-	upstream	-447	447	Upstream
chr3	23428963	23429164	202	*	277	428.2	0	999	X3.23429063	AT3G63450	23426749	23429154	-	overlapStart	191	10	Upstream
chr3	23450345	23450546	202	*	117	42	0	4.12	X3.23450445	AT3G63500	23446230	23450198	-	upstream	-147	147	Upstream
chr3	23450345	23450546	202	*	117	42	0	4.12	X3.23450445	AT3G63510	23450536	23452794	+	overlapStart	-191	10	Upstream
chr3	2099527	2099728	202	*	124	58	0	10.24	X3.2099627	AT3G66658	2095105	2099151	-	upstream	-376	376	Upstream
chr4	40678	40879	202	*	117	42.3	0	4.42	X4.40778	AT4G00110	38504	40189	-	upstream	-489	489	Upstream
chr4	82374	82575	202	*	135	86.5	0	25.99	X4.82474	AT4G00190	80433	82040	-	upstream	-334	334	Upstream
chr4	87843	88044	202	*	208	263	0	185.19	X4.87943	AT4G00210	85693	86895	-	upstream	-948	948	Upstream
chr4	114358	114559	202	*	115	37	0	2.69	X4.114458	AT4G00250	112705	113966	-	upstream	-392	392	Upstream
chr4	114358	114559	202	*	115	37	0	2.69	X4.114458	AT4G00260	114971	117051	+	upstream	-613	412	Upstream
chr4	167435	167636	202	*	153	129	0	55.87	X4.167535	AT4G00380	167959	170974	+	upstream	-524	323	Upstream
chr4	202349	202550	202	*	141	100.5	0	35.13	X4.202449	AT4G00450	202416	211003	+	overlapStart	-67	67	Upstream
chr4	233592	233793	202	*	121	51	0	7.28	X4.233692	AT4G00530	232928	233645	-	overlapStart	53	53	Upstream
chr4	268452	268653	202	*	116	39	0	3.22	X4.268552	AT4G00630	261449	268050	-	upstream	-402	402	Upstream
chr4	268452	268653	202	*	116	39	0	3.22	X4.268552	AT4G00650	269026	271503	+	upstream	-574	373	Upstream
chr4	330980	331181	202	*	138	93	0	29.79	X4.331080	AT4G00770	331157	333477	+	overlapStart	-177	24	Upstream
chr4	393569	393770	202	*	124	59	0	10.67	X4.393669	AT4G00920	393767	395382	+	overlapStart	-198	3	Upstream
chr4	426788	426989	202	*	114	36	0	2.43	X4.426888	AT4G00990	426944	431821	+	overlapStart	-156	45	Upstream
chr4	476347	476548	202	*	116	39.2	0	3.51	X4.476447	AT4G01100	477141	479936	+	upstream	-794	593	Upstream
chr4	527294	527495	202	*	140	97.9	0	33.09	X4.527394	AT4G01245	527591	528144	+	upstream	-297	96	Upstream
chr4	531905	532106	202	*	133	82	0	22.95	X4.532005	AT4G01270	532351	534984	+	upstream	-446	245	Upstream
chr4	534882	535083	202	*	130	72.9	0	17.83	X4.534982	AT4G01280	535211	537322	+	upstream	-329	128	Upstream
chr4	578118	578319	202	*	131	76	0	19.49	X4.578218	AT4G01410	578165	579169	+	overlapStart	-47	47	Upstream
chr4	685502	685703	202	*	126	63.8	0	13.03	X4.685602	AT4G01580	685746	686827	+	upstream	-244	43	Upstream
chr4	810423	810624	202	*	122	54.4	0	8.92	X4.810523	AT4G01870	808376	810446	-	overlapStart	23	23	Upstream
chr4	868075	868276	202	*	120	48.6	0	6.51	X4.868175	AT4G01985	866236	868126	-	overlapStart	51	51	Upstream
chr4	880779	880980	202	*	118	45	0	5.08	X4.880879	AT4G02010	881090	885399	+	upstream	-311	110	Upstream
chr4	905392	905593	202	*	116	41	0	3.8	X4.905492	AT4G02070	905866	913190	+	upstream	-474	273	Upstream
chr4	994812	995013	202	*	120	50	0	6.89	X4.994912	AT4G02280	994927	998967	+	overlapStart	-115	86	Upstream
chr4	1026369	1026570	202	*	138	93	0	29.79	X4.1026469	AT4G02320	1022725	1026118	-	upstream	-251	251	Upstream
chr4	1040718	1040919	202	*	115	37.4	0	2.95	X4.1040818	AT4G02360	1041142	1041733	+	upstream	-424	223	Upstream
chr4	1066585	1066786	202	*	126	63	0	12.54	X4.1066685	AT4G02420	1064363	1066372	-	upstream	-213	213	Upstream
chr4	1072336	1072537	202	*	124	58.3	0	10.67	X4.1072436	AT4G02440	1072481	1073779	+	overlapStart	-145	56	Upstream
chr4	1116760	1116961	202	*	115	38	0	2.95	X4.1116860	AT4G02540	1117154	1119817	+	upstream	-394	193	Upstream
chr4	1178313	1178514	202	*	128	69.7	0	16.23	X4.1178413	AT4G02670	1176190	1178489	-	overlapStart	176	25	Upstream
chr4	1203324	1203525	202	*	119	48	0	6.14	X4.1203424	AT4G02715	1202170	1203380	-	overlapStart	56	56	Upstream
chr4	1206349	1206550	202	*	116	39.5	0	3.51	X4.1206449	AT4G02720	1204303	1205866	-	upstream	-483	483	Upstream
chr4	1223561	1223762	202	*	115	38	0	2.95	X4.1223661	AT4G02750	1221116	1223461	-	upstream	-100	100	Upstream
chr4	1258256	1258457	202	*	146	111.5	0	42.92	X4.1258356	AT4G02820	1258568	1260665	+	upstream	-312	111	Upstream
chr4	1335453	1335654	202	*	117	42.6	0	4.42	X4.1335553	AT4G03020	1331399	1335297	-	upstream	-156	156	Upstream
chr4	1396083	1396284	202	*	126	64	0	13.03	X4.1396183	AT4G03153	1394845	1395588	-	upstream	-495	495	Upstream
chr4	1407189	1407390	202	*	152	127.9	0	55.08	X4.1407289	AT4G03190	1404887	1407139	-	upstream	-50	50	Upstream
chr4	1412443	1412644	202	*	160	145.8	0	69.8	X4.1412543	AT4G03205	1412785	1414902	+	upstream	-342	141	Upstream
chr4	1442208	1442409	202	*	131	75.6	0	19.49	X4.1442308	AT4G03290	1442634	1443499	+	upstream	-426	225	Upstream
chr4	1465787	1465988	202	*	114	34.3	0	2.2	X4.1465887	AT4G03330	1466336	1467750	+	upstream	-549	348	Upstream
chr4	1490393	1490594	202	*	118	45	0	5.08	X4.1490493	AT4G03380	1485049	1490228	-	upstream	-165	165	Upstream
chr4	1495473	1495674	202	*	137	90	0	27.87	X4.1495573	AT4G03390	1490465	1495103	-	upstream	-370	370	Upstream
chr4	1532230	1532431	202	*	117	43	0	4.42	X4.1532330	AT4G03450	1529446	1531780	-	upstream	-450	450	Upstream
chr4	1557525	1557726	202	*	126	64.8	0	13.52	X4.1557625	AT4G03505	1556888	1557319	-	upstream	-206	206	Upstream
chr4	2289870	2290071	202	*	119	47.9	0	6.14	X4.2289970	AT4G04570	2289959	2292755	+	overlapStart	-89	89	Upstream
chr4	2440927	2441128	202	*	162	151.9	0	74.93	X4.2441027	AT4G04810	2441327	2442567	+	upstream	-400	199	Upstream
chr4	2609054	2609255	202	*	121	51	0	7.28	X4.2609154	AT4G05090	2609142	2611762	+	overlapStart	-88	88	Upstream
chr4	2741060	2741261	202	*	120	49	0	6.51	X4.2741160	AT4G05390	2738531	2740667	-	upstream	-393	393	Upstream
chr4	2741060	2741261	202	*	120	49	0	6.51	X4.2741160	AT4G05400	2741160	2742949	+	overlapStart	-100	100	Upstream
chr4	3667733	3667934	202	*	119	48.2	0	6.51	X4.3667833	AT4G06599	3665925	3667547	-	upstream	-186	186	Upstream
chr4	5285782	5285983	202	*	121	52	0	7.68	X4.5285882	AT4G08350	5286234	5292239	+	upstream	-452	251	Upstream
chr4	5797508	5797709	202	*	132	78.8	0	21.2	X4.5797608	AT4G09040	5794529	5797375	-	upstream	-133	133	Upstream
chr4	6065621	6065822	202	*	117	42.5	0	4.42	X4.6065721	AT4G09590	6066128	6066763	+	upstream	-507	306	Upstream
chr4	6076445	6076646	202	*	119	46.2	0	5.78	X4.6076545	AT4G09610	6074770	6075645	-	upstream	-800	800	Upstream
chr4	6079156	6079357	202	*	123	56	0	9.34	X4.6079256	AT4G09620	6076992	6079102	-	upstream	-54	54	Upstream
chr4	6177202	6177403	202	*	131	77	0	20.05	X4.6177302	AT4G09810	6175176	6177293	-	overlapStart	91	91	Upstream
chr4	6263402	6263603	202	*	120	50	0	7.28	X4.6263502	AT4G10000	6260310	6263181	-	upstream	-221	221	Upstream
chr4	6267766	6267967	202	*	123	57	0	9.78	X4.6267866	AT4G10020	6268289	6270434	+	upstream	-523	322	Upstream
chr4	6407341	6407542	202	*	165	157.2	0	80.15	X4.6407441	AT4G10340	6408016	6409677	+	upstream	-675	474	Upstream
chr4	6523141	6523342	202	*	124	58	0	10.22	X4.6523241	AT4G10560	6520771	6522882	-	upstream	-259	259	Upstream
chr4	6571220	6571421	202	*	138	93	0	29.79	X4.6571320	AT4G10640	6571899	6574427	+	upstream	-679	478	Upstream
chr4	6705226	6705427	202	*	139	94.5	0	31.1	X4.6705326	AT4G10925	6702725	6704645	-	upstream	-581	581	Upstream
chr4	6780296	6780497	202	*	121	51.6	0	7.68	X4.6780396	AT4G11130	6780522	6784440	+	upstream	-226	25	Upstream
chr4	6819181	6819382	202	*	117	42.8	0	4.42	X4.6819281	AT4G11180	6820033	6820747	+	upstream	-852	651	Upstream
chr4	6826541	6826742	202	*	143	106	0	38.61	X4.6826641	AT4G11190	6826677	6827383	+	overlapStart	-136	65	Upstream
chr4	6869288	6869489	202	*	116	41	0	3.8	X4.6869388	AT4G11290	6869953	6871661	+	upstream	-665	464	Upstream
chr4	6883306	6883507	202	*	127	66	0	14.01	X4.6883406	AT4G11310	6883551	6885517	+	upstream	-245	44	Upstream
chr4	6961974	6962175	202	*	122	54.6	0	8.92	X4.6962074	AT4G11450	6958681	6962046	-	overlapStart	72	72	Upstream
chr4	6970902	6971103	202	*	132	77.4	0	20.62	X4.6971002	AT4G11480	6971408	6973799	+	upstream	-506	305	Upstream
chr4	7007845	7008046	202	*	116	40	0	3.51	X4.7007945	AT4G11580	7006648	7007738	-	upstream	-107	107	Upstream
chr4	7026280	7026481	202	*	115	38.6	0	3.22	X4.7026380	AT4G11650	7024856	7026146	-	upstream	-134	134	Upstream
chr4	7287182	7287383	202	*	123	57.8	0	7.59	X4.7287282	AT4G12240	7287803	7289225	+	upstream	-621	420	Upstream
chr4	7297696	7297897	202	*	145	110.8	0	42.19	X4.7297796	AT4G12270	7297808	7299930	+	overlapStart	-112	89	Upstream
chr4	7304246	7304447	202	*	128	68	0	15.19	X4.7304346	AT4G12290	7304405	7307138	+	overlapStart	-159	42	Upstream
chr4	7334712	7334913	202	*	128	69.4	0	16.23	X4.7334812	AT4G12380	7333511	7334469	-	upstream	-243	243	Upstream
chr4	7450300	7450501	202	*	122	54	0	8.49	X4.7450400	AT4G12580	7449274	7450031	-	upstream	-269	269	Upstream
chr4	7541418	7541619	202	*	154	131.8	0	58.26	X4.7541518	AT4G12870	7542233	7543474	+	upstream	-815	614	Upstream
chr4	7546108	7546309	202	*	166	161	0	82.81	X4.7546208	AT4G12880	7544381	7545327	-	upstream	-781	781	Upstream
chr4	7546108	7546309	202	*	166	161	0	82.81	X4.7546208	AT4G12890	7546377	7547641	+	upstream	-269	68	Upstream
chr4	7583118	7583319	202	*	125	62.5	0	12.54	X4.7583218	AT4G12960	7583272	7584630	+	overlapStart	-154	47	Upstream
chr4	7646950	7647151	202	*	135	85	0	24.76	X4.7647050	AT4G13130	7647389	7649831	+	upstream	-439	238	Upstream
chr4	7912720	7912921	202	*	153	129	0	55.87	X4.7912820	AT4G13600	7911179	7912892	-	overlapStart	172	29	Upstream
chr4	7943126	7943327	202	*	123	56	0	9.34	X4.7943226	AT4G13650	7938967	7942898	-	upstream	-228	228	Upstream
chr4	8007566	8007767	202	*	149	118.9	0	48.12	X4.8007666	AT4G13810	8005032	8007510	-	upstream	-56	56	Upstream
chr4	8054295	8054496	202	*	123	57.2	0	10.22	X4.8054395	AT4G13940	8054861	8057181	+	upstream	-566	365	Upstream
chr4	8079446	8079647	202	*	146	113	0	43.65	X4.8079546	AT4G13980	8076980	8079314	-	upstream	-132	132	Upstream
chr4	8084173	8084374	202	*	146	112	0	42.92	X4.8084273	AT4G13990	8084395	8086095	+	upstream	-222	21	Upstream
chr4	8093425	8093626	202	*	149	119.8	0	48.88	X4.8093525	AT4G14010	8092833	8093382	-	upstream	-43	43	Upstream
chr4	8100193	8100394	202	*	115	38	0	2.95	X4.8100293	AT4G14030	8097918	8100260	-	overlapStart	67	67	Upstream
chr4	8103357	8103558	202	*	143	106	0	38.61	X4.8103457	AT4G14040	8100349	8102875	-	upstream	-482	482	Upstream
chr4	8124117	8124318	202	*	119	47.2	0	6.14	X4.8124217	AT4G14090	8122188	8123835	-	upstream	-282	282	Upstream
chr4	8123292	8123493	202	*	122	55	0	8.91	X4.8123392	AT4G14096	8124415	8126514	+	upstream	-1123	922	Upstream
chr4	8120636	8120837	202	*	115	36.8	0	2.69	X4.8120736	AT4G14100	8120718	8122417	+	overlapStart	-82	82	Upstream
chr4	8135025	8135226	202	*	119	46	0	5.43	X4.8135125	AT4G14110	8132886	8134920	-	upstream	-105	105	Upstream
chr4	8134215	8134416	202	*	119	48	0	6.14	X4.8134315	AT4G14120	8135124	8136967	+	upstream	-909	708	Upstream
chr4	8138708	8138909	202	*	143	104	0	37.2	X4.8138808	AT4G14130	8137051	8138281	-	upstream	-427	427	Upstream
chr4	8185561	8185762	202	*	129	71.9	0	17.29	X4.8185661	AT4G14190	8183544	8185187	-	upstream	-374	374	Upstream
chr4	8255882	8256083	202	*	247	356.8	0	295.37	X4.8255982	AT4G14342	8253550	8255508	-	upstream	-374	374	Upstream
chr4	8307643	8307844	202	*	114	36.1	0	2.69	X4.8307743	AT4G14440	8306745	8307753	-	overlapStart	110	91	Upstream
chr4	8340640	8340841	202	*	158	141	0	65.61	X4.8340740	AT4G14520	8341335	8343234	+	upstream	-695	494	Upstream
chr4	8362141	8362342	202	*	139	94.9	0	31.1	X4.8362241	AT4G14570	8362184	8366653	+	overlapStart	-43	43	Upstream
chr4	8439894	8440095	202	*	125	60.9	0	11.59	X4.8439994	AT4G14723	8439899	8440839	+	overlapStart	-5	5	Upstream
chr4	8448322	8448523	202	*	224	300.9	0	228.2	X4.8448422	AT4G14730	8448549	8450073	+	upstream	-227	26	Upstream
chr4	8484769	8484970	202	*	124	59.8	0	11.13	X4.8484869	AT4G14770	8481370	8484825	-	overlapStart	56	56	Upstream
chr4	8500580	8500781	202	*	157	140	0	64.78	X4.8500680	AT4G14790	8496031	8500152	-	upstream	-428	428	Upstream
chr4	8530164	8530365	202	*	123	57.7	0	10.22	X4.8530264	AT4G14910	8528167	8530334	-	overlapStart	170	31	Upstream
chr4	8571205	8571406	202	*	151	124	0	51.95	X4.8571305	AT4G15000	8571833	8572489	+	upstream	-628	427	Upstream
chr4	8574816	8575017	202	*	151	124	0	51.96	X4.8574916	AT4G15020	8575386	8578688	+	upstream	-570	369	Upstream
chr4	8642688	8642889	202	*	136	89	0	27.23	X4.8642788	AT4G15150	8641672	8642278	-	upstream	-410	410	Upstream
chr4	8669944	8670145	202	*	116	41	0	3.8	X4.8670044	AT4G15210	8666338	8669470	-	upstream	-474	474	Upstream
chr4	8732641	8732842	202	*	115	38	0	2.95	X4.8732741	AT4G15300	8730723	8732748	-	overlapStart	107	94	Upstream
chr4	8736674	8736875	202	*	123	56	0	9.34	X4.8736774	AT4G15310	8736721	8740047	+	overlapStart	-47	47	Upstream
chr4	8753113	8753314	202	*	116	41	0	3.8	X4.8753213	AT4G15330	8751387	8753157	-	overlapStart	44	44	Upstream
chr4	8807409	8807610	202	*	121	52.2	0	8.08	X4.8807509	AT4G15396	8807527	8810512	+	overlapStart	-118	83	Upstream
chr4	8827472	8827673	202	*	115	38	0	2.95	X4.8827572	AT4G15430	8827876	8831504	+	upstream	-404	203	Upstream
chr4	9023716	9023917	202	*	140	98	0	33.09	X4.9023816	AT4G15900	9023728	9027666	+	overlapStart	-12	12	Upstream
chr4	9036071	9036272	202	*	136	87.6	0	26.61	X4.9036171	AT4G15930	9036222	9038062	+	overlapStart	-151	50	Upstream
chr4	9128814	9129015	202	*	159	143	0	67.28	X4.9128914	AT4G16140	9129016	9129841	+	upstream	-202	1	Upstream
chr4	9204387	9204588	202	*	146	112.7	0	39.32	X4.9204487	AT4G16265	9202352	9204078	-	upstream	-309	309	Upstream
chr4	9204387	9204588	202	*	146	112.7	0	39.32	X4.9204487	AT4G16270	9205016	9206552	+	upstream	-629	428	Upstream
chr4	9244569	9244770	202	*	118	45.6	0	5.43	X4.9244669	AT4G16360	9245078	9247251	+	upstream	-509	308	Upstream
chr4	9262949	9263150	202	*	132	78	0	20.62	X4.9263049	AT4G16410	9261866	9262601	-	upstream	-348	348	Upstream
chr4	9273194	9273395	202	*	140	98	0	33.77	X4.9273294	AT4G16442	9271856	9273089	-	upstream	-105	105	Upstream
chr4	9324384	9324585	202	*	138	93.4	0	30.44	X4.9324484	AT4G16550	9318442	9324254	-	upstream	-130	130	Upstream
chr4	9349471	9349672	202	*	116	41	0	3.8	X4.9349571	AT4G16600	9350039	9352707	+	upstream	-568	367	Upstream
chr4	9432408	9432609	202	*	117	43.4	0	4.75	X4.9432508	AT4G16765	9429875	9432437	-	overlapStart	29	29	Upstream
chr4	9472346	9472547	202	*	118	45	0	5.08	X4.9472446	AT4G16835	9472763	9474803	+	upstream	-417	216	Upstream
chr4	9479488	9479689	202	*	124	58.7	0	10.67	X4.9479588	AT4G16850	9480076	9481738	+	upstream	-588	387	Upstream
chr4	9551383	9551584	202	*	145	111.1	0	42.92	X4.9551483	AT4G16960	9546343	9551007	-	upstream	-376	376	Upstream
chr4	9556942	9557143	202	*	121	52	0	7.68	X4.9557042	AT4G16980	9556978	9557812	+	overlapStart	-36	36	Upstream
chr4	9589567	9589768	202	*	137	91	0	28.5	X4.9589667	AT4G17040	9585705	9589362	-	upstream	-205	205	Upstream
chr4	9589567	9589768	202	*	137	91	0	28.5	X4.9589667	AT4G17050	9589567	9592587	+	overlapStart	0	0	Upstream
chr4	9663816	9664017	202	*	130	73	0	17.83	X4.9663916	AT4G17230	9660985	9663774	-	upstream	-42	42	Upstream
chr4	9669746	9669947	202	*	131	75	0	18.93	X4.9669846	AT4G17250	9670881	9673417	+	upstream	-1135	934	Upstream
chr4	9814782	9814983	202	*	119	47	0	5.78	X4.9814882	AT4G17610	9805513	9814910	-	overlapStart	128	73	Upstream
chr4	9824700	9824901	202	*	121	52.4	0	8.08	X4.9824800	AT4G17640	9825153	9827357	+	upstream	-453	252	Upstream
chr4	9844347	9844548	202	*	123	57	0	9.78	X4.9844447	AT4G17680	9842872	9844265	-	upstream	-82	82	Upstream
chr4	9936348	9936549	202	*	131	76.7	0	20.05	X4.9936448	AT4G17890	9937022	9939493	+	upstream	-674	473	Upstream
chr4	10071245	10071446	202	*	116	39.7	0	3.51	X4.10071345	AT4G18197	10071634	10073236	+	upstream	-389	188	Upstream
chr4	10081407	10081608	202	*	114	36	0	2.44	X4.10081507	AT4G18240	10082108	10087203	+	upstream	-701	500	Upstream
chr4	10202939	10203140	202	*	129	72.3	0	17.83	X4.10203039	AT4G18490	10203598	10208197	+	upstream	-659	458	Upstream
chr4	10230960	10231161	202	*	124	58.1	0	10.67	X4.10231060	AT4G18570	10231218	10234693	+	upstream	-258	57	Upstream
chr4	10279322	10279523	202	*	121	52	0	7.68	X4.10279422	AT4G18670	10275462	10278491	-	upstream	-831	831	Upstream
chr4	10393889	10394090	202	*	118	44.9	0	5.08	X4.10393989	AT4G18975	10391965	10393991	-	overlapStart	102	99	Upstream
chr4	10440136	10440337	202	*	125	62	0	12.06	X4.10440236	AT4G19045	10438024	10439900	-	upstream	-236	236	Upstream
chr4	10449319	10449520	202	*	159	144	0	68.11	X4.10449419	AT4G19090	10449900	10452757	+	upstream	-581	380	Upstream
chr4	10453694	10453895	202	*	125	60.9	0	11.59	X4.10453794	AT4G19095	10452889	10453521	-	upstream	-173	173	Upstream
chr4	10452821	10453022	202	*	124	58.1	0	10.67	X4.10452921	AT4G19100	10453415	10454359	+	upstream	-594	393	Upstream
chr4	10599030	10599231	202	*	125	61	0	11.59	X4.10599130	AT4G19430	10598445	10599151	-	overlapStart	121	80	Upstream
chr4	10615155	10615356	202	*	170	170.9	0	91.82	X4.10615255	AT4G19490	10615796	10623521	+	upstream	-641	440	Upstream
chr4	10667808	10668009	202	*	115	37	0	2.69	X4.10667908	AT4G19580	10668367	10669452	+	upstream	-559	358	Upstream
chr4	10672227	10672428	202	*	125	60.8	0	11.59	X4.10672327	AT4G19600	10672765	10676735	+	upstream	-538	337	Upstream
chr4	10685071	10685272	202	*	118	45	0	5.08	X4.10685171	AT4G19630	10683936	10684683	-	upstream	-388	388	Upstream
chr4	10786679	10786880	202	*	195	231.3	0	151.86	X4.10786779	AT4G19880	10784391	10786556	-	upstream	-123	123	Upstream
chr4	10878436	10878637	202	*	134	83	0	23.55	X4.10878536	AT4G20130	10878887	10881945	+	upstream	-451	250	Upstream
chr4	10907930	10908131	202	*	117	42	0	4.11	X4.10908030	AT4G20190	10906508	10907677	-	upstream	-253	253	Upstream
chr4	10949556	10949757	202	*	116	39	0	3.22	X4.10949656	AT4G20270	10949661	10953083	+	overlapStart	-105	96	Upstream
chr4	11006953	11007154	202	*	129	71	0	16.75	X4.11007053	AT4G20390	11007035	11008066	+	overlapStart	-82	82	Upstream
chr4	11149996	11150197	202	*	135	84.6	0	24.76	X4.11150096	AT4G20820	11150160	11151758	+	overlapStart	-164	37	Upstream
chr4	11197484	11197685	202	*	116	39.1	0	3.51	X4.11197584	AT4G20920	11193597	11197577	-	overlapStart	93	93	Upstream
chr4	11201570	11201771	202	*	128	68	0	15.71	X4.11201670	AT4G20930	11198389	11201087	-	upstream	-483	483	Upstream
chr4	11447137	11447338	202	*	121	53	0	8.08	X4.11447237	AT4G21510	11445849	11447163	-	overlapStart	26	26	Upstream
chr4	11491271	11491472	202	*	121	51.8	0	7.68	X4.11491371	AT4G21620	11491482	11492167	+	upstream	-211	10	Upstream
chr4	11495411	11495612	202	*	127	66.1	0	14.57	X4.11495511	AT4G21630	11492248	11495500	-	overlapStart	89	89	Upstream
chr4	11500593	11500794	202	*	124	59.5	0	11.13	X4.11500693	AT4G21640	11496834	11500618	-	overlapStart	25	25	Upstream
chr4	11534664	11534865	202	*	121	51.7	0	7.68	X4.11534764	AT4G21705	11532971	11534847	-	overlapStart	183	18	Upstream
chr4	11577382	11577583	202	*	176	185.9	0	105.82	X4.11577482	AT4G21810	11575096	11577195	-	upstream	-187	187	Upstream
chr4	11577382	11577583	202	*	176	185.9	0	105.82	X4.11577482	AT4G21820	11577524	11584053	+	overlapStart	-142	59	Upstream
chr4	11755207	11755408	202	*	116	40	0	3.51	X4.11755307	AT4G22214	11755310	11756195	+	overlapStart	-103	98	Upstream
chr4	11778409	11778610	202	*	133	81	0	22.36	X4.11778509	AT4G22280	11775969	11778123	-	upstream	-286	286	Upstream
chr4	11785733	11785934	202	*	150	122	0	50.41	X4.11785833	AT4G22290	11782905	11785816	-	overlapStart	83	83	Upstream
chr4	11797047	11797248	202	*	122	55	0	9.34	X4.11797147	AT4G22330	11797567	11799856	+	upstream	-520	319	Upstream
chr4	11839408	11839609	202	*	136	87	0	25.99	X4.11839508	AT4G22460	11839160	11839561	-	overlapStart	153	48	Upstream
chr4	11879055	11879256	202	*	114	34.6	0	2.2	X4.11879155	AT4G22550	11878137	11878920	-	upstream	-135	135	Upstream
chr4	11929110	11929311	202	*	148	116	0	45.87	X4.11929210	AT4G22690	11929359	11931693	+	upstream	-249	48	Upstream
chr4	11956747	11956948	202	*	123	56	0	9.34	X4.11956847	AT4G22756	11954840	11956813	-	overlapStart	66	66	Upstream
chr4	11960536	11960737	202	*	127	66	0	14.01	X4.11960636	AT4G22760	11960553	11962289	+	overlapStart	-17	17	Upstream
chr4	12006246	12006447	202	*	114	34.7	0	2.2	X4.12006346	AT4G22880	12004768	12006209	-	upstream	-37	37	Upstream
chr4	12043574	12043775	202	*	147	115	0	45.13	X4.12043674	AT4G22970	12033437	12043728	-	overlapStart	154	47	Upstream
chr4	12120497	12120698	202	*	205	255.9	0	177.52	X4.12120597	AT4G23130	12117541	12120134	-	upstream	-363	363	Upstream
chr4	12120497	12120698	202	*	205	255.9	0	177.52	X4.12120597	AT4G23140	12121383	12124205	+	upstream	-886	685	Upstream
chr4	12128891	12129092	202	*	128	70	0	16.23	X4.12128991	AT4G23160	12129485	12134187	+	upstream	-594	393	Upstream
chr4	12144267	12144468	202	*	123	55.8	0	9.34	X4.12144367	AT4G23190	12141032	12143833	-	upstream	-434	434	Upstream
chr4	12185107	12185308	202	*	118	45.6	0	5.43	X4.12185207	AT4G23310	12185737	12188763	+	upstream	-630	429	Upstream
chr4	12228683	12228884	202	*	138	91.8	0	29.15	X4.12228783	AT4G23430	12229026	12231658	+	upstream	-343	142	Upstream
chr4	12257531	12257732	202	*	177	187	0	106.77	X4.12257631	AT4G23493	12256180	12257039	-	upstream	-492	492	Upstream
chr4	12272811	12273012	202	*	143	105.9	0	38.61	X4.12272911	AT4G23515	12271382	12272842	-	overlapStart	31	31	Upstream
chr4	12327889	12328090	202	*	123	57.4	0	10.22	X4.12327989	AT4G23650	12324758	12327459	-	upstream	-430	430	Upstream
chr4	12413856	12414057	202	*	117	43	0	4.42	X4.12413956	AT4G23870	12414230	12415049	+	upstream	-374	173	Upstream
chr4	12416457	12416658	202	*	115	38	0	2.95	X4.12416557	AT4G23880	12415677	12416450	-	upstream	-7	7	Upstream
chr4	12461781	12461982	202	*	123	56.5	0	9.78	X4.12461881	AT4G24000	12462030	12465625	+	upstream	-249	48	Upstream
chr4	12539316	12539517	202	*	119	48	0	6.14	X4.12539416	AT4G24160	12539777	12542489	+	upstream	-461	260	Upstream
chr4	12555855	12556056	202	*	118	43.7	0	4.75	X4.12555955	AT4G24190	12551717	12555909	-	overlapStart	54	54	Upstream
chr4	12580157	12580358	202	*	154	132	0	58.26	X4.12580257	AT4G24260	12577871	12580133	-	upstream	-24	24	Upstream
chr4	12603518	12603719	202	*	133	80.3	0	22.36	X4.12603618	AT4G24320	12602298	12603485	-	upstream	-33	33	Upstream
chr4	12624191	12624392	202	*	125	62.7	0	12.54	X4.12624291	AT4G24410	12623530	12624039	-	upstream	-152	152	Upstream
chr4	12635032	12635233	202	*	122	54.4	0	8.92	X4.12635132	AT4G24450	12635426	12642797	+	upstream	-394	193	Upstream
chr4	12642328	12642529	202	*	116	39.3	0	3.51	X4.12642428	AT4G24460	12642854	12645501	+	upstream	-526	325	Upstream
chr4	12673935	12674136	202	*	116	40	0	3.8	X4.12674035	AT4G24540	12670965	12674072	-	overlapStart	137	64	Upstream
chr4	12749300	12749501	202	*	124	60	0	11.13	X4.12749400	AT4G24710	12745547	12748995	-	upstream	-305	305	Upstream
chr4	12789665	12789866	202	*	151	124.3	0	52.73	X4.12789765	AT4G24810	12786130	12789791	-	overlapStart	126	75	Upstream
chr4	12819082	12819283	202	*	116	39.8	0	3.51	X4.12819182	AT4G24910	12817954	12818901	-	upstream	-181	181	Upstream
chr4	12824133	12824334	202	*	119	48	0	6.51	X4.12824233	AT4G24930	12821223	12823742	-	upstream	-391	391	Upstream
chr4	12825531	12825732	202	*	123	57.5	0	10.22	X4.12825631	AT4G24950	12826282	12826755	+	upstream	-751	550	Upstream
chr4	12830470	12830671	202	*	116	41	0	3.8	X4.12830570	AT4G24970	12831009	12835449	+	upstream	-539	338	Upstream
chr4	12945002	12945203	202	*	120	48.9	0	6.51	X4.12945102	AT4G25290	12941242	12944994	-	upstream	-8	8	Upstream
chr4	12945002	12945203	202	*	120	48.9	0	6.51	X4.12945102	AT4G25300	12945173	12946778	+	overlapStart	-171	30	Upstream
chr4	12992414	12992615	202	*	138	94	0	30.44	X4.12992514	AT4G25420	12990884	12992458	-	overlapStart	44	44	Upstream
chr4	13009956	13010157	202	*	205	254	0	175.34	X4.13010056	AT4G25440	13006727	13009608	-	upstream	-348	348	Upstream
chr4	13109212	13109413	202	*	115	38	0	2.95	X4.13109312	AT4G25740	13107250	13108827	-	upstream	-385	385	Upstream
chr4	13147169	13147370	202	*	119	46	0	5.43	X4.13147269	AT4G25860	13147326	13149606	+	overlapStart	-157	44	Upstream
chr4	13216776	13216977	202	*	133	82	0	22.95	X4.13216876	AT4G26060	13214746	13216461	-	upstream	-315	315	Upstream
chr4	13262303	13262504	202	*	131	75.7	0	19.49	X4.13262403	AT4G26180	13260061	13262035	-	upstream	-268	268	Upstream
chr4	13406140	13406341	202	*	137	91	0	28.5	X4.13406240	AT4G26555	13404465	13406245	-	overlapStart	105	96	Upstream
chr4	13417081	13417282	202	*	116	38.8	0	3.22	X4.13417181	AT4G26590	13413973	13417055	-	upstream	-26	26	Upstream
chr4	13429860	13430061	202	*	116	39.3	0	3.51	X4.13429960	AT4G26620	13427411	13429964	-	overlapStart	104	97	Upstream
chr4	13448619	13448820	202	*	151	123.4	0	51.96	X4.13448719	AT4G26660	13448684	13452016	+	overlapStart	-65	65	Upstream
chr4	13478657	13478858	202	*	220	292	0	217.82	X4.13478757	AT4G26750	13475694	13478523	-	upstream	-134	134	Upstream
chr4	13487316	13487517	202	*	124	58	0	10.22	X4.13487416	AT4G26790	13487457	13489376	+	overlapStart	-141	60	Upstream
chr4	13511484	13511685	202	*	125	61.2	0	12.06	X4.13511584	AT4G26890	13511839	13513406	+	upstream	-355	154	Upstream
chr4	13515356	13515557	202	*	158	142	0	66.44	X4.13515456	AT4G26900	13515478	13519855	+	overlapStart	-122	79	Upstream
chr4	13604467	13604668	202	*	139	95	0	31.1	X4.13604567	AT4G27120	13601970	13604427	-	upstream	-40	40	Upstream
chr4	13609227	13609428	202	*	162	151	0	74.07	X4.13609327	AT4G27150	13609341	13610075	+	overlapStart	-114	87	Upstream
chr4	13611536	13611737	202	*	131	75	0	18.93	X4.13611636	AT4G27160	13611796	13612563	+	upstream	-260	59	Upstream
chr4	13637211	13637412	202	*	116	40	0	3.51	X4.13637311	AT4G27220	13633953	13636712	-	upstream	-499	499	Upstream
chr4	13683485	13683686	202	*	114	35.8	0	2.44	X4.13683585	AT4G27330	13682078	13683538	-	overlapStart	53	53	Upstream
chr4	13718168	13718369	202	*	177	187.1	0	107.73	X4.13718268	AT4G27430	13718679	13723324	+	upstream	-511	310	Upstream
chr4	13749136	13749337	202	*	128	69	0	15.7	X4.13749236	AT4G27510	13746176	13749031	-	upstream	-105	105	Upstream
chr4	13771001	13771202	202	*	116	40.9	0	3.8	X4.13771101	AT4G27590	13771185	13772594	+	overlapStart	-184	17	Upstream
chr4	13822688	13822889	202	*	126	64	0	13.03	X4.13822788	AT4G27690	13823588	13826395	+	upstream	-900	699	Upstream
chr4	13855009	13855210	202	*	114	34.5	0	2.2	X4.13855109	AT4G27800	13851862	13854191	-	upstream	-818	818	Upstream
chr4	13866663	13866864	202	*	115	38	0	2.95	X4.13866763	AT4G27840	13865045	13866287	-	upstream	-376	376	Upstream
chr4	13873038	13873239	202	*	122	54	0	8.49	X4.13873138	AT4G27860	13873708	13876528	+	upstream	-670	469	Upstream
chr4	13890147	13890348	202	*	312	514	0	999	X4.13890247	AT4G27900	13890644	13893073	+	upstream	-497	296	Upstream
chr4	13901042	13901243	202	*	128	68.5	0	15.71	X4.13901142	AT4G27920	13901220	13901970	+	overlapStart	-178	23	Upstream
chr4	13929823	13930024	202	*	116	39.8	0	3.51	X4.13929923	AT4G28010	13930359	13933270	+	upstream	-536	335	Upstream
chr4	13935751	13935952	202	*	114	36	0	2.44	X4.13935851	AT4G28020	13933232	13935315	-	upstream	-436	436	Upstream
chr4	13980192	13980393	202	*	131	77	0	20.05	X4.13980292	AT4G28160	13980316	13981001	+	overlapStart	-124	77	Upstream
chr4	14001893	14002094	202	*	193	225.5	0	145.62	X4.14001993	AT4G28250	14000038	14002069	-	overlapStart	176	25	Upstream
chr4	14003797	14003998	202	*	116	41	0	3.8	X4.14003897	AT4G28260	14004485	14006970	+	upstream	-688	487	Upstream
chr4	14025458	14025659	202	*	158	140.5	0	65.61	X4.14025558	AT4G28340	14024534	14025655	-	overlapStart	197	4	Upstream
chr4	14033642	14033843	202	*	114	34.1	0	2.2	X4.14033742	AT4G28365	14032845	14033840	-	overlapStart	198	3	Upstream
chr4	14041000	14041201	202	*	229	313	0	243.41	X4.14041100	AT4G28380	14039756	14040931	-	upstream	-69	69	Upstream
chr4	14065307	14065508	202	*	124	58	0	10.67	X4.14065407	AT4G28450	14061459	14064708	-	upstream	-599	599	Upstream
chr4	14065307	14065508	202	*	124	58	0	10.67	X4.14065407	AT4G28460	14065997	14066543	+	upstream	-690	489	Upstream
chr4	14087358	14087559	202	*	143	104.9	0	37.9	X4.14087458	AT4G28520	14087556	14089796	+	overlapStart	-198	3	Upstream
chr4	14154488	14154689	202	*	142	103	0	36.51	X4.14154588	AT4G28680	14155120	14158716	+	upstream	-632	431	Upstream
chr4	14167714	14167915	202	*	138	92.3	0	29.79	X4.14167814	AT4G28706	14167730	14172454	+	overlapStart	-16	16	Upstream
chr4	14206778	14206979	202	*	138	93	0	29.79	X4.14206878	AT4G28760	14207460	14212050	+	upstream	-682	481	Upstream
chr4	14232696	14232897	202	*	147	114	0	44.39	X4.14232796	AT4G28820	14230695	14232342	-	upstream	-354	354	Upstream
chr4	14304870	14305071	202	*	228	311.2	0	241.06	X4.14304970	AT4G29020	14304921	14305721	+	overlapStart	-51	51	Upstream
chr4	14368221	14368422	202	*	120	49	0	6.51	X4.14368321	AT4G29140	14368919	14370892	+	upstream	-698	497	Upstream
chr4	14515122	14515323	202	*	153	130	0	56.66	X4.14515222	AT4G29600	14515578	14516501	+	upstream	-456	255	Upstream
chr4	14525162	14525363	202	*	118	44.1	0	5.09	X4.14525262	AT4G29640	14525830	14526870	+	upstream	-668	467	Upstream
chr4	14539912	14540113	202	*	124	59.7	0	11.13	X4.14540012	AT4G29680	14537781	14539594	-	upstream	-318	318	Upstream
chr4	14631481	14631682	202	*	202	246.5	0	167.78	X4.14631581	AT4G29910	14627963	14630740	-	upstream	-741	741	Upstream
chr4	14665781	14665982	202	*	138	93.7	0	30.44	X4.14665881	AT4G29980	14664954	14665583	-	upstream	-198	198	Upstream
chr4	14677200	14677401	202	*	141	100.6	0	35.13	X4.14677300	AT4G30020	14677285	14681956	+	overlapStart	-85	85	Upstream
chr4	14858012	14858213	202	*	124	58.1	0	10.67	X4.14858112	AT4G30360	14854811	14858003	-	upstream	-9	9	Upstream
chr4	14911286	14911487	202	*	147	115.8	0	45.87	X4.14911386	AT4G30520	14908000	14911307	-	overlapStart	21	21	Upstream
chr4	14960454	14960655	202	*	125	62	0	12.06	X4.14960554	AT4G30680	14958687	14960321	-	upstream	-133	133	Upstream
chr4	14960454	14960655	202	*	125	62	0	12.06	X4.14960554	AT4G30690	14960646	14962466	+	overlapStart	-192	9	Upstream
chr4	15045439	15045640	202	*	114	35	0	2.2	X4.15045539	AT4G30910	15042413	15045315	-	upstream	-124	124	Upstream
chr4	15049997	15050198	202	*	129	70.4	0	16.76	X4.15050097	AT4G30920	15046457	15049373	-	upstream	-624	624	Upstream
chr4	15054331	15054532	202	*	129	71	0	16.75	X4.15054431	AT4G30935	15051814	15054042	-	upstream	-289	289	Upstream
chr4	15054331	15054532	202	*	129	71	0	16.75	X4.15054431	AT4G30940	15054873	15056826	+	upstream	-542	341	Upstream
chr4	15236850	15237051	202	*	128	70	0	16.23	X4.15236950	AT4G31400	15237370	15239323	+	upstream	-520	319	Upstream
chr4	15247961	15248162	202	*	115	38	0	2.95	X4.15248061	AT4G31420	15245813	15247927	-	upstream	-34	34	Upstream
chr4	15247961	15248162	202	*	115	38	0	2.95	X4.15248061	AT4G31430	15248456	15252837	+	upstream	-495	294	Upstream
chr4	15253687	15253888	202	*	127	66	0	14.01	X4.15253787	AT4G31440	15253731	15254870	+	overlapStart	-44	44	Upstream
chr4	15312665	15312866	202	*	153	129.2	0	56.66	X4.15312765	AT4G31590	15309506	15312591	-	upstream	-74	74	Upstream
chr4	15356532	15356733	202	*	118	44	0	4.75	X4.15356632	AT4G31720	15353952	15356352	-	upstream	-180	180	Upstream
chr4	15367954	15368155	202	*	119	48.2	0	6.51	X4.15368054	AT4G31750	15364418	15367716	-	upstream	-238	238	Upstream
chr4	15469290	15469491	202	*	160	147	0	70.65	X4.15469390	AT4G31985	15469895	15470559	+	upstream	-605	404	Upstream
chr4	15548546	15548747	202	*	124	58	0	10.22	X4.15548646	AT4G32200	15548840	15555094	+	upstream	-294	93	Upstream
chr4	15576981	15577182	202	*	132	79	0	21.2	X4.15577081	AT4G32270	15574868	15576543	-	upstream	-438	438	Upstream
chr4	15608432	15608633	202	*	116	40.1	0	3.8	X4.15608532	AT4G32330	15608912	15612285	+	upstream	-480	279	Upstream
chr4	15713244	15713445	202	*	131	75.9	0	19.49	X4.15713344	AT4G32560	15713736	15716659	+	upstream	-492	291	Upstream
chr4	15720730	15720931	202	*	131	76.4	0	20.05	X4.15720830	AT4G32580	15719847	15720535	-	upstream	-195	195	Upstream
chr4	15720807	15721008	202	*	121	52.6	0	8.08	X4.15720907	AT4G32590	15721324	15722908	+	upstream	-517	316	Upstream
chr4	15869018	15869219	202	*	138	94	0	30.44	X4.15869118	AT4G32880	15863452	15868625	-	upstream	-393	393	Upstream
chr4	15880578	15880779	202	*	160	147	0	70.65	X4.15880678	AT4G32910	15881256	15885416	+	upstream	-678	477	Upstream
chr4	15885230	15885431	202	*	121	51.6	0	7.68	X4.15885330	AT4G32915	15885520	15886980	+	upstream	-290	89	Upstream
chr4	16043590	16043791	202	*	121	50.9	0	7.28	X4.16043690	AT4G33260	16041067	16043457	-	upstream	-133	133	Upstream
chr4	16071207	16071408	202	*	125	61	0	11.59	X4.16071307	AT4G33370	16069669	16071405	-	overlapStart	198	3	Upstream
chr4	16071207	16071408	202	*	125	61	0	11.59	X4.16071307	AT4G33380	16071802	16074994	+	upstream	-595	394	Upstream
chr4	16108712	16108913	202	*	117	43.1	0	4.75	X4.16108812	AT4G33480	16105611	16108646	-	upstream	-66	66	Upstream
chr4	16118331	16118532	202	*	139	95.8	0	31.76	X4.16118431	AT4G33520	16118896	16126151	+	upstream	-565	364	Upstream
chr4	16137720	16137921	202	*	133	81.6	0	22.95	X4.16137820	AT4G33580	16138359	16141624	+	upstream	-639	438	Upstream
chr4	16154919	16155120	202	*	181	196.9	0	116.42	X4.16155019	AT4G33625	16152926	16154722	-	upstream	-197	197	Upstream
chr4	16154919	16155120	202	*	181	196.9	0	116.42	X4.16155019	AT4G33630	16155503	16159578	+	upstream	-584	383	Upstream
chr4	16196799	16197000	202	*	258	383	0	999	X4.16196899	AT4G33770	16193422	16196428	-	upstream	-371	371	Upstream
chr4	16203946	16204147	202	*	124	59	0	10.67	X4.16204046	AT4G33780	16201831	16203641	-	upstream	-305	305	Upstream
chr4	16249366	16249567	202	*	116	39.5	0	3.51	X4.16249466	AT4G33890	16249643	16251379	+	upstream	-277	76	Upstream
chr4	16262554	16262755	202	*	115	36.8	0	2.69	X4.16262654	AT4G33925	16263237	16264226	+	upstream	-683	482	Upstream
chr4	16294821	16295022	202	*	136	88	0	26.61	X4.16294921	AT4G34000	16295430	16298255	+	upstream	-609	408	Upstream
chr4	16401851	16402052	202	*	114	36	0	2.44	X4.16401951	AT4G34265	16402280	16403823	+	upstream	-429	228	Upstream
chr4	16413627	16413828	202	*	115	37	0	2.69	X4.16413727	AT4G34310	16414113	16419735	+	upstream	-486	285	Upstream
chr4	16428444	16428645	202	*	118	45.6	0	5.43	X4.16428544	AT4G34340	16426639	16428010	-	upstream	-434	434	Upstream
chr4	16444624	16444825	202	*	167	162	0	83.7	X4.16444724	AT4G34400	16445208	16447773	+	upstream	-584	383	Upstream
chr4	16454778	16454979	202	*	119	45.9	0	5.43	X4.16454878	AT4G34412	16452960	16454633	-	upstream	-145	145	Upstream
chr4	16728885	16729086	202	*	215	280	0	204.16	X4.16728985	AT4G35150	16726948	16728531	-	upstream	-354	354	Upstream
chr4	16767487	16767688	202	*	134	82.3	0	23.55	X4.16767587	AT4G35240	16760949	16767087	-	upstream	-400	400	Upstream
chr4	16777230	16777431	202	*	118	44.5	0	5.08	X4.16777330	AT4G35263	16776630	16776797	-	upstream	-433	433	Upstream
chr4	16819406	16819607	202	*	114	36	0	2.44	X4.16819506	AT4G35380	16819883	16826061	+	upstream	-477	276	Upstream
chr4	16835870	16836071	202	*	122	54	0	8.15	X4.16835970	AT4G35420	16833933	16835619	-	upstream	-251	251	Upstream
chr4	16838951	16839152	202	*	116	41	0	3.8	X4.16839051	AT4G35450	16839532	16842077	+	upstream	-581	380	Upstream
chr4	16873148	16873349	202	*	115	37.6	0	2.95	X4.16873248	AT4G35540	16873835	16875598	+	upstream	-687	486	Upstream
chr4	16888715	16888916	202	*	233	322.9	0	254.08	X4.16888815	AT4G35570	16887165	16888356	-	upstream	-359	359	Upstream
chr4	16903659	16903860	202	*	162	151.4	0	74.93	X4.16903759	AT4G35630	16904059	16905722	+	upstream	-400	199	Upstream
chr4	16927724	16927925	202	*	144	108.4	0	40.75	X4.16927824	AT4G35720	16927972	16929170	+	upstream	-248	47	Upstream
chr4	16992947	16993148	202	*	135	84.7	0	24.76	X4.16993047	AT4G35880	16993339	16995820	+	upstream	-392	191	Upstream
chr4	17034860	17035061	202	*	128	69	0	15.71	X4.17034960	AT4G35987	17035028	17036963	+	overlapStart	-168	33	Upstream
chr4	17054661	17054862	202	*	115	37.7	0	2.95	X4.17054761	AT4G36060	17055321	17056704	+	upstream	-660	459	Upstream
chr4	17123267	17123468	202	*	367	646.4	0	999	X4.17123367	AT4G36190	17123966	17127018	+	upstream	-699	498	Upstream
chr4	17148289	17148490	202	*	114	35.7	0	2.44	X4.17148389	AT4G36240	17147196	17148221	-	upstream	-68	68	Upstream
chr4	17165243	17165444	202	*	132	78.1	0	21.2	X4.17165343	AT4G36270	17161024	17165241	-	upstream	-2	2	Upstream
chr4	17173040	17173241	202	*	118	45.5	0	5.43	X4.17173140	AT4G36290	17169464	17173215	-	overlapStart	175	26	Upstream
chr4	17181677	17181878	202	*	132	78.1	0	21.2	X4.17181777	AT4G36360	17176342	17181261	-	upstream	-416	416	Upstream
chr4	17201850	17202051	202	*	119	48	0	6.14	X4.17201950	AT4G36410	17201922	17202988	+	overlapStart	-72	72	Upstream
chr4	17217837	17218038	202	*	206	256	0	177.52	X4.17217937	AT4G36480	17218132	17221477	+	upstream	-295	94	Upstream
chr4	17287229	17287430	202	*	115	37.3	0	2.95	X4.17287329	AT4G36660	17285732	17287429	-	overlapStart	200	1	Upstream
chr4	17298043	17298244	202	*	131	75	0	18.93	X4.17298143	AT4G36690	17293947	17297761	-	upstream	-282	282	Upstream
chr4	17472486	17472687	202	*	119	47.1	0	6.14	X4.17472586	AT4G37080	17473120	17476952	+	upstream	-634	433	Upstream
chr4	17476550	17476751	202	*	117	42	0	4.11	X4.17476650	AT4G37090	17477232	17478729	+	upstream	-682	481	Upstream
chr4	17497982	17498183	202	*	126	63.3	0	13.03	X4.17498082	AT4G37160	17494705	17497124	-	upstream	-858	858	Upstream
chr4	17590546	17590747	202	*	116	41	0	3.8	X4.17590646	AT4G37410	17590772	17592920	+	upstream	-226	25	Upstream
chr4	17780811	17781012	202	*	120	49.5	0	6.89	X4.17780911	AT4G37810	17780970	17781745	+	overlapStart	-159	42	Upstream
chr4	17815517	17815718	202	*	115	38	0	2.95	X4.17815617	AT4G37890	17812736	17815095	-	upstream	-422	422	Upstream
chr4	17872414	17872615	202	*	114	35	0	2.2	X4.17872514	AT4G38050	17869379	17872482	-	overlapStart	68	68	Upstream
chr4	17899585	17899786	202	*	132	78	0	20.62	X4.17899685	AT4G38130	17896292	17899491	-	upstream	-94	94	Upstream
chr4	17938892	17939093	202	*	121	50.9	0	7.28	X4.17938992	AT4G38260	17936921	17938728	-	upstream	-164	164	Upstream
chr4	17941514	17941715	202	*	147	113.8	0	44.39	X4.17941614	AT4G38280	17941796	17943363	+	upstream	-282	81	Upstream
chr4	17954181	17954382	202	*	122	54	0	8.49	X4.17954281	AT4G38340	17954710	17957828	+	upstream	-529	328	Upstream
chr4	17980818	17981019	202	*	150	121.1	0	50.41	X4.17980918	AT4G38410	17980940	17981719	+	overlapStart	-122	79	Upstream
chr4	18084470	18084671	202	*	122	55	0	8.92	X4.18084570	AT4G38740	18083395	18084251	-	upstream	-219	219	Upstream
chr4	18121109	18121310	202	*	115	37.4	0	2.95	X4.18121209	AT4G38825	18121526	18122010	+	upstream	-417	216	Upstream
chr4	18179061	18179262	202	*	117	41.6	0	4.11	X4.18179161	AT4G39010	18175902	18179183	-	overlapStart	122	79	Upstream
chr4	18206451	18206652	202	*	158	141.9	0	66.44	X4.18206551	AT4G39070	18204855	18206509	-	overlapStart	58	58	Upstream
chr4	18220682	18220883	202	*	120	50	0	6.89	X4.18220782	AT4G39100	18217939	18220290	-	upstream	-392	392	Upstream
chr4	18227814	18228015	202	*	114	34.9	0	2.2	X4.18227914	AT4G39120	18220589	18227988	-	overlapStart	174	27	Upstream
chr4	18293555	18293756	202	*	138	92.9	0	29.79	X4.18293655	AT4G39340	18293129	18293512	-	upstream	-43	43	Upstream
chr4	18361219	18361420	202	*	124	59.9	0	11.13	X4.18361319	AT4G39470	18359373	18361170	-	upstream	-49	49	Upstream
chr4	18389023	18389224	202	*	146	111.4	0	42.92	X4.18389123	AT4G39590	18387331	18388732	-	upstream	-291	291	Upstream
chr4	18390936	18391137	202	*	116	41	0	3.8	X4.18391036	AT4G39600	18389436	18390539	-	upstream	-397	397	Upstream
chr4	18406632	18406833	202	*	142	102.6	0	36.51	X4.18406732	AT4G39660	18406765	18409564	+	overlapStart	-133	68	Upstream
chr4	18428660	18428861	202	*	117	42.5	0	4.42	X4.18428760	AT4G39710	18427039	18428412	-	upstream	-248	248	Upstream
chr4	18472255	18472456	202	*	149	119.1	0	48.88	X4.18472355	AT4G39800	18469348	18471967	-	upstream	-288	288	Upstream
chr4	18576079	18576280	202	*	121	51.6	0	7.68	X4.18576179	AT4G40070	18576418	18577774	+	upstream	-339	138	Upstream
chr5	6009	6210	202	*	161	149.5	0	72.5	X5.6109	AT5G01015	5256	5891	-	upstream	-118	118	Upstream
chr5	8298	8499	202	*	121	51.9	0	7.51	X5.8398	AT5G01020	5917	8444	-	overlapStart	146	55	Upstream
chr5	97226	97427	202	*	125	61	0	11.37	X5.97326	AT5G01240	97894	101835	+	upstream	-668	467	Upstream
chr5	176263	176464	202	*	149	120	0	48.34	X5.176363	AT5G01420	174799	176214	-	upstream	-49	49	Upstream
chr5	220624	220825	202	*	143	104	0	36.75	X5.220724	AT5G01560	218138	220530	-	upstream	-94	94	Upstream
chr5	323997	324198	202	*	119	46.9	0	5.63	X5.324097	AT5G01840	324552	325516	+	upstream	-555	354	Upstream
chr5	336997	337198	202	*	133	81.6	0	22.62	X5.337097	AT5G01870	337177	337820	+	overlapStart	-180	21	Upstream
chr5	339744	339945	202	*	251	367	0	305.88	X5.339844	AT5G01881	339838	340266	+	overlapStart	-94	94	Upstream
chr5	345467	345668	202	*	147	114.3	0	44.61	X5.345567	AT5G01890	341543	345127	-	upstream	-340	340	Upstream
chr5	425917	426118	202	*	116	39.9	0	3.4	X5.426017	AT5G02150	424291	426079	-	overlapStart	162	39	Upstream
chr5	425917	426118	202	*	116	39.9	0	3.4	X5.426017	AT5G02160	426226	427297	+	upstream	-309	108	Upstream
chr5	435139	435340	202	*	115	37.5	0	2.86	X5.435239	AT5G02190	435211	436897	+	overlapStart	-72	72	Upstream
chr5	451239	451440	202	*	133	80	0	21.45	X5.451339	AT5G02240	451423	453157	+	overlapStart	-184	17	Upstream
chr5	541376	541577	202	*	119	48	0	5.99	X5.541476	AT5G02460	539249	541112	-	upstream	-264	264	Upstream
chr5	553028	553229	202	*	115	37	0	2.6	X5.553128	AT5G02490	550035	552647	-	upstream	-381	381	Upstream
chr5	574832	575033	202	*	187	212	0	130.26	X5.574932	AT5G02560	575382	576606	+	upstream	-550	349	Upstream
chr5	629606	629807	202	*	126	65	0	13.27	X5.629706	AT5G02770	627034	629255	-	upstream	-351	351	Upstream
chr5	651788	651989	202	*	126	64	0	12.79	X5.651888	AT5G02850	652110	653673	+	upstream	-322	121	Upstream
chr5	672136	672337	202	*	115	36.6	0	2.6	X5.672236	AT5G02890	670065	671471	-	upstream	-665	665	Upstream
chr5	680131	680332	202	*	128	69	0	15.44	X5.680231	AT5G02920	680541	681777	+	upstream	-410	209	Upstream
chr5	697304	697505	202	*	147	113.6	0	43.88	X5.697404	AT5G02980	697993	699000	+	upstream	-689	488	Upstream
chr5	716579	716780	202	*	124	58.3	0	10.46	X5.716679	AT5G03050	715029	716321	-	upstream	-258	258	Upstream
chr5	781516	781717	202	*	121	52	0	7.5	X5.781616	AT5G03270	781870	783997	+	upstream	-354	153	Upstream
chr5	816575	816776	202	*	119	46	0	5.29	X5.816675	AT5G03350	815674	816658	-	overlapStart	83	83	Upstream
chr5	858463	858664	202	*	124	59	0	10.46	X5.858563	AT5G03440	856872	858428	-	upstream	-35	35	Upstream
chr5	882780	882981	202	*	159	144.8	0	68.27	X5.882880	AT5G03520	883447	885425	+	upstream	-667	466	Upstream
chr5	918094	918295	202	*	119	48.1	0	6.36	X5.918194	AT5G03620	918738	921874	+	upstream	-644	443	Upstream
chr5	967697	967898	202	*	150	122	0	49.85	X5.967797	AT5G03700	965874	967322	-	upstream	-375	375	Upstream
chr5	1047094	1047295	202	*	114	34.5	0	2.12	X5.1047194	AT5G03890	1047150	1047689	+	overlapStart	-56	56	Upstream
chr5	1069962	1070163	202	*	134	83	0	23.21	X5.1070062	AT5G03960	1068260	1069978	-	overlapStart	16	16	Upstream
chr5	1096011	1096212	202	*	114	34	0	2.12	X5.1096111	AT5G04050	1096016	1098920	+	overlapStart	-5	5	Upstream
chr5	1098800	1099001	202	*	119	46	0	5.29	X5.1098900	AT5G04060	1099118	1102058	+	upstream	-318	117	Upstream
chr5	1169026	1169227	202	*	117	43	0	4.3	X5.1169126	AT5G04240	1169544	1174878	+	upstream	-518	317	Upstream
chr5	1217597	1217798	202	*	169	167	0	88.28	X5.1217697	AT5G04340	1216131	1217106	-	upstream	-491	491	Upstream
chr5	1278030	1278231	202	*	128	70	0	15.96	X5.1278130	AT5G04480	1271513	1277985	-	upstream	-45	45	Upstream
chr5	1286553	1286754	202	*	116	39	0	3.12	X5.1286653	AT5G04510	1286866	1289908	+	upstream	-313	112	Upstream
chr5	1294555	1294756	202	*	120	49.3	0	6.73	X5.1294655	AT5G04530	1291822	1293688	-	upstream	-867	867	Upstream
chr5	1434521	1434722	202	*	168	165	0	85.59	X5.1434621	AT5G04900	1434774	1437330	+	upstream	-253	52	Upstream
chr5	1507429	1507630	202	*	128	68.5	0	15.44	X5.1507529	AT5G05100	1505122	1507224	-	upstream	-205	205	Upstream
chr5	1519367	1519568	202	*	114	36	0	2.35	X5.1519467	AT5G05140	1519913	1522667	+	upstream	-546	345	Upstream
chr5	1535544	1535745	202	*	117	41.7	0	3.99	X5.1535644	AT5G05170	1530174	1535414	-	upstream	-130	130	Upstream
chr5	1535544	1535745	202	*	117	41.7	0	3.99	X5.1535644	AT5G05180	1536226	1538492	+	upstream	-682	481	Upstream
chr5	1568591	1568792	202	*	156	137	0	61.68	X5.1568691	AT5G05290	1568694	1569864	+	overlapStart	-103	98	Upstream
chr5	1576828	1577029	202	*	164	156.9	0	78.53	X5.1576928	AT5G05320	1575006	1576731	-	upstream	-97	97	Upstream
chr5	1604679	1604880	202	*	126	65	0	13.76	X5.1604779	AT5G05420	1604040	1604823	-	overlapStart	144	57	Upstream
chr5	1624357	1624558	202	*	200	241.9	0	161.21	X5.1624457	AT5G05480	1622172	1624270	-	upstream	-87	87	Upstream
chr5	1684256	1684457	202	*	114	34.9	0	2.12	X5.1684356	AT5G05640	1684566	1685812	+	upstream	-310	109	Upstream
chr5	1767454	1767655	202	*	116	40	0	3.4	X5.1767554	AT5G05870	1767639	1769262	+	overlapStart	-185	16	Upstream
chr5	1776743	1776944	202	*	117	42	0	3.99	X5.1776843	AT5G05910	1776858	1777313	+	overlapStart	-115	86	Upstream
chr5	1785823	1786024	202	*	118	44	0	4.62	X5.1785923	AT5G05940	1785927	1788436	+	overlapStart	-104	97	Upstream
chr5	1790036	1790237	202	*	146	113	0	43.14	X5.1790136	AT5G05960	1790231	1790833	+	overlapStart	-195	6	Upstream
chr5	1893923	1894124	202	*	119	46.8	0	5.64	X5.1894023	AT5G06250	1892714	1894124	-	overlapStart	201	0	Upstream
chr5	1967345	1967546	202	*	116	39.6	0	3.4	X5.1967445	AT5G06440	1964468	1967335	-	upstream	-10	10	Upstream
chr5	1978985	1979186	202	*	114	35.9	0	2.35	X5.1979085	AT5G06490	1977996	1978589	-	upstream	-396	396	Upstream
chr5	1984667	1984868	202	*	132	79	0	20.88	X5.1984767	AT5G06510	1984991	1987044	+	upstream	-324	123	Upstream
chr5	1995183	1995384	202	*	189	214.9	0	133.28	X5.1995283	AT5G06530	1989747	1994912	-	upstream	-271	271	Upstream
chr5	2001537	2001738	202	*	116	40	0	3.4	X5.2001637	AT5G06540	1999181	2001049	-	upstream	-488	488	Upstream
chr5	2033293	2033494	202	*	124	58.5	0	10.46	X5.2033393	AT5G06620	2033760	2036143	+	upstream	-467	266	Upstream
chr5	2098890	2099091	202	*	198	237	0	155.94	X5.2098990	AT5G06790	2097669	2098740	-	upstream	-150	150	Upstream
chr5	2132235	2132436	202	*	128	70	0	15.96	X5.2132335	AT5G06860	2132350	2133587	+	overlapStart	-115	86	Upstream
chr5	2150732	2150933	202	*	536	1054.3	0	999	X5.2150832	AT5G06940	2148078	2150771	-	overlapStart	39	39	Upstream
chr5	2150732	2150933	202	*	536	1054.3	0	999	X5.2150832	AT5G06950	2151025	2154553	+	upstream	-293	92	Upstream
chr5	2210514	2210715	202	*	125	61.6	0	11.8	X5.2210614	AT5G07130	2210567	2212620	+	overlapStart	-53	53	Upstream
chr5	2212723	2212924	202	*	114	35.2	0	2.35	X5.2212823	AT5G07140	2212826	2215530	+	overlapStart	-103	98	Upstream
chr5	2317132	2317333	202	*	136	88	0	26.24	X5.2317232	AT5G07340	2317213	2319649	+	overlapStart	-81	81	Upstream
chr5	2397671	2397872	202	*	120	48.8	0	6.36	X5.2397771	AT5G07571	2396432	2397423	-	upstream	-248	248	Upstream
chr5	2429678	2429879	202	*	268	408	0	999	X5.2429778	AT5G07670	2430146	2432196	+	upstream	-468	267	Upstream
chr5	2482654	2482855	202	*	124	59.4	0	10.91	X5.2482754	AT5G07790	2483311	2486361	+	upstream	-657	456	Upstream
chr5	2502835	2503036	202	*	120	49	0	6.36	X5.2502935	AT5G07830	2503323	2506688	+	upstream	-488	287	Upstream
chr5	2511012	2511213	202	*	122	53.3	0	8.31	X5.2511112	AT5G07860	2511442	2513095	+	upstream	-430	229	Upstream
chr5	2513467	2513668	202	*	115	38.1	0	3.12	X5.2513567	AT5G07870	2513794	2515418	+	upstream	-327	126	Upstream
chr5	2611116	2611317	202	*	117	41.5	0	3.99	X5.2611216	AT5G08130	2606200	2610250	-	upstream	-866	866	Upstream
chr5	2697549	2697750	202	*	127	66.5	0	14.25	X5.2697649	AT5G08380	2694677	2697724	-	overlapStart	175	26	Upstream
chr5	2699176	2699377	202	*	116	38.7	0	3.12	X5.2699276	AT5G08391	2699301	2699784	+	overlapStart	-125	76	Upstream
chr5	2720145	2720346	202	*	143	106.1	0	38.85	X5.2720245	AT5G08440	2720669	2727167	+	upstream	-524	323	Upstream
chr5	2770698	2770899	202	*	128	70	0	15.96	X5.2770798	AT5G08550	2765642	2770282	-	upstream	-416	416	Upstream
chr5	2838213	2838414	202	*	118	45	0	4.95	X5.2838313	AT5G08710	2834743	2838090	-	upstream	-123	123	Upstream
chr5	2845717	2845918	202	*	219	288.6	0	212.91	X5.2845817	AT5G08720	2841418	2845381	-	upstream	-336	336	Upstream
chr5	2851798	2851999	202	*	123	57	0	9.58	X5.2851898	AT5G08740	2848506	2851428	-	upstream	-370	370	Upstream
chr5	2851798	2851999	202	*	123	57	0	9.58	X5.2851898	AT5G08750	2851979	2854513	+	overlapStart	-181	20	Upstream
chr5	3036843	3037044	202	*	131	77	0	19.74	X5.3036943	AT5G09770	3035040	3036561	-	upstream	-282	282	Upstream
chr5	3122653	3122854	202	*	120	49	0	6.36	X5.3122753	AT5G09980	3122731	3123964	+	overlapStart	-78	78	Upstream
chr5	3150548	3150749	202	*	164	156	0	77.66	X5.3150648	AT5G10070	3148522	3150434	-	upstream	-114	114	Upstream
chr5	3150548	3150749	202	*	164	156	0	77.66	X5.3150648	AT5G10080	3150843	3153380	+	upstream	-295	94	Upstream
chr5	3168216	3168417	202	*	116	39	0	3.12	X5.3168316	AT5G10110	3166439	3168297	-	overlapStart	81	81	Upstream
chr5	3190748	3190949	202	*	149	119.8	0	48.34	X5.3190848	AT5G10170	3187277	3190251	-	upstream	-497	497	Upstream
chr5	3250126	3250327	202	*	122	54	0	8.31	X5.3250226	AT5G10330	3247847	3250138	-	overlapStart	12	12	Upstream
chr5	3385381	3385582	202	*	130	74	0	18.09	X5.3385481	AT5G10720	3385901	3390686	+	upstream	-520	319	Upstream
chr5	3396345	3396546	202	*	152	127	0	53.71	X5.3396445	AT5G10740	3393569	3396200	-	upstream	-145	145	Upstream
chr5	3396345	3396546	202	*	152	127	0	53.71	X5.3396445	AT5G10745	3396475	3398063	+	overlapStart	-130	71	Upstream
chr5	3402421	3402622	202	*	138	92	0	28.76	X5.3402521	AT5G10760	3400342	3402207	-	upstream	-214	214	Upstream
chr5	3405405	3405606	202	*	125	62	0	11.84	X5.3405505	AT5G10770	3403110	3405448	-	overlapStart	43	43	Upstream
chr5	3410063	3410264	202	*	129	70.5	0	16.48	X5.3410163	AT5G10790	3410539	3412633	+	upstream	-476	275	Upstream
chr5	3440870	3441071	202	*	115	36.4	0	2.6	X5.3440970	AT5G10920	3441752	3444142	+	upstream	-882	681	Upstream
chr5	3447058	3447259	202	*	118	44.9	0	4.95	X5.3447158	AT5G10930	3445366	3447114	-	overlapStart	56	56	Upstream
chr5	3462184	3462385	202	*	116	40	0	3.4	X5.3462284	AT5G10950	3459273	3461734	-	upstream	-450	450	Upstream
chr5	3483264	3483465	202	*	123	56.5	0	9.58	X5.3483364	AT5G11010	3483704	3486267	+	upstream	-440	239	Upstream
chr5	3550365	3550566	202	*	125	61	0	11.37	X5.3550465	AT5G11160	3550520	3552207	+	overlapStart	-155	46	Upstream
chr5	3658856	3659057	202	*	128	70	0	15.96	X5.3658956	AT5G11460	3656811	3658931	-	overlapStart	75	75	Upstream
chr5	3675916	3676117	202	*	121	53	0	7.9	X5.3676016	AT5G11500	3676548	3679352	+	upstream	-632	431	Upstream
chr5	3709082	3709283	202	*	198	238	0	156.99	X5.3709182	AT5G11550	3708009	3709246	-	overlapStart	164	37	Upstream
chr5	3829881	3830082	202	*	114	36	0	2.35	X5.3829981	AT5G11880	3827526	3829986	-	overlapStart	105	96	Upstream
chr5	3831144	3831345	202	*	227	307	0	233.62	X5.3831244	AT5G11890	3831664	3832944	+	upstream	-520	319	Upstream
chr5	3957262	3957463	202	*	125	61.4	0	11.84	X5.3957362	AT5G12235	3957740	3958051	+	upstream	-478	277	Upstream
chr5	4002880	4003081	202	*	122	54	0	8.31	X5.4002980	AT5G12360	4000699	4002634	-	upstream	-246	246	Upstream
chr5	4077135	4077336	202	*	116	39	0	3.12	X5.4077235	AT5G12910	4077162	4077557	+	overlapStart	-27	27	Upstream
chr5	4087676	4087877	202	*	115	38.4	0	3.12	X5.4087776	AT5G12940	4087712	4089004	+	overlapStart	-36	36	Upstream
chr5	4101863	4102064	202	*	123	56.2	0	9.58	X5.4101963	AT5G12970	4102135	4105327	+	upstream	-272	71	Upstream
chr5	4122076	4122277	202	*	140	98	0	32.67	X5.4122176	AT5G13010	4122410	4128861	+	upstream	-334	133	Upstream
chr5	4218322	4218523	202	*	133	81	0	22.03	X5.4218422	AT5G13220	4218888	4220883	+	upstream	-566	365	Upstream
chr5	4254714	4254915	202	*	228	310	0	237.12	X5.4254814	AT5G13290	4252842	4254894	-	overlapStart	180	21	Upstream
chr5	4292484	4292685	202	*	184	202.9	0	121.32	X5.4292584	AT5G13390	4292747	4296725	+	upstream	-263	62	Upstream
chr5	4302121	4302322	202	*	123	56.6	0	9.58	X5.4302221	AT5G13410	4299705	4301780	-	upstream	-341	341	Upstream
chr5	4311961	4312162	202	*	116	41	0	3.69	X5.4312061	AT5G13450	4310314	4312048	-	overlapStart	87	87	Upstream
chr5	4315481	4315682	202	*	119	47.1	0	5.99	X5.4315581	AT5G13460	4315759	4318360	+	upstream	-278	77	Upstream
chr5	4317947	4318148	202	*	115	38	0	2.85	X5.4318047	AT5G13470	4318524	4319924	+	upstream	-577	376	Upstream
chr5	4340667	4340868	202	*	140	96.9	0	32.01	X5.4340767	AT5G13510	4341262	4342095	+	upstream	-595	394	Upstream
chr5	4427391	4427592	202	*	151	123.7	0	51.39	X5.4427491	AT5G13710	4423695	4427058	-	upstream	-333	333	Upstream
chr5	4427078	4427279	202	*	116	39.3	0	3.4	X5.4427178	AT5G13720	4427783	4429133	+	upstream	-705	504	Upstream
chr5	4444839	4445040	202	*	144	107	0	38.85	X5.4444939	AT5G13770	4445423	4447476	+	upstream	-584	383	Upstream
chr5	4481810	4482011	202	*	117	42	0	3.99	X5.4481910	AT5G13900	4481232	4481889	-	overlapStart	79	79	Upstream
chr5	4546613	4546814	202	*	177	186.7	0	105.86	X5.4546713	AT5G14090	4547202	4549417	+	upstream	-589	388	Upstream
chr5	4560246	4560447	202	*	122	55.4	0	9.15	X5.4560346	AT5G14130	4558704	4560067	-	upstream	-179	179	Upstream
chr5	4566917	4567118	202	*	125	61	0	11.37	X5.4567017	AT5G14150	4565172	4566988	-	overlapStart	71	71	Upstream
chr5	4566917	4567118	202	*	125	61	0	11.37	X5.4567017	AT5G14160	4567333	4568467	+	upstream	-416	215	Upstream
chr5	4591483	4591684	202	*	128	68	0	14.74	X5.4591583	AT5G14230	4591741	4595964	+	upstream	-258	57	Upstream
chr5	4604559	4604760	202	*	123	56	0	9.15	X5.4604659	AT5G14270	4604613	4608905	+	overlapStart	-54	54	Upstream
chr5	4608562	4608763	202	*	124	60	0	10.91	X5.4608662	AT5G14280	4609123	4611444	+	upstream	-561	360	Upstream
chr5	4643145	4643346	202	*	153	129	0	55.28	X5.4643245	AT5G14400	4643521	4646382	+	upstream	-376	175	Upstream
chr5	4689886	4690087	202	*	120	49	0	6.36	X5.4689986	AT5G14540	4687147	4689674	-	upstream	-212	212	Upstream
chr5	4693974	4694175	202	*	118	45.8	0	5.29	X5.4694074	AT5G14550	4691006	4694055	-	overlapStart	81	81	Upstream
chr5	4732932	4733133	202	*	114	35.5	0	2.35	X5.4733032	AT5G14680	4730907	4733081	-	overlapStart	149	52	Upstream
chr5	4757667	4757868	202	*	118	44	0	4.62	X5.4757767	AT5G14740	4757972	4762615	+	upstream	-305	104	Upstream
chr5	4805137	4805338	202	*	135	85.9	0	25.01	X5.4805237	AT5G14850	4801897	4804990	-	upstream	-147	147	Upstream
chr5	4953799	4954000	202	*	143	104.3	0	37.44	X5.4953899	AT5G15254	4953095	4953274	-	upstream	-525	525	Upstream
chr5	4973875	4974076	202	*	271	414	0	999	X5.4973975	AT5G15310	4974671	4976227	+	upstream	-796	595	Upstream
chr5	5038373	5038574	202	*	134	83.1	0	23.81	X5.5038473	AT5G15520	5037021	5038172	-	upstream	-201	201	Upstream
chr5	5038373	5038574	202	*	134	83.1	0	23.81	X5.5038473	AT5G15530	5038751	5040840	+	upstream	-378	177	Upstream
chr5	5095309	5095510	202	*	179	193	0	111.59	X5.5095409	AT5G15660	5095652	5097041	+	upstream	-343	142	Upstream
chr5	5126229	5126430	202	*	116	40.5	0	3.69	X5.5126329	AT5G15720	5124525	5126181	-	upstream	-48	48	Upstream
chr5	5172809	5173010	202	*	153	128.5	0	55.28	X5.5172909	AT5G15840	5171182	5172758	-	upstream	-51	51	Upstream
chr5	5177047	5177248	202	*	134	84.2	0	24.41	X5.5177147	AT5G15853	5178107	5178307	+	upstream	-1060	859	Upstream
chr5	5192716	5192917	202	*	125	61.2	0	11.84	X5.5192816	AT5G15910	5193111	5195396	+	upstream	-395	194	Upstream
chr5	5237031	5237232	202	*	130	73.2	0	18.09	X5.5237131	AT5G16030	5238178	5240748	+	upstream	-1147	946	Upstream
chr5	5337608	5337809	202	*	136	87	0	25.62	X5.5337708	AT5G16300	5337974	5342432	+	upstream	-366	165	Upstream
chr5	5347293	5347494	202	*	128	68	0	14.74	X5.5347393	AT5G16330	5346163	5346977	-	upstream	-316	316	Upstream
chr5	5350822	5351023	202	*	132	78	0	20.31	X5.5350922	AT5G16340	5349094	5350907	-	overlapStart	85	85	Upstream
chr5	5450533	5450734	202	*	115	37	0	2.6	X5.5450633	AT5G16620	5450696	5454535	+	overlapStart	-163	38	Upstream
chr5	5913232	5913433	202	*	137	90	0	27.49	X5.5913332	AT5G17880	5908874	5913099	-	upstream	-133	133	Upstream
chr5	5947883	5948084	202	*	128	70	0	15.96	X5.5947983	AT5G17960	5945665	5947464	-	upstream	-419	419	Upstream
chr5	5961459	5961660	202	*	175	181.7	0	101.15	X5.5961559	AT5G18000	5959900	5961642	-	overlapStart	183	18	Upstream
chr5	5985189	5985390	202	*	125	60.9	0	11.37	X5.5985289	AT5G18090	5985365	5987165	+	overlapStart	-176	25	Upstream
chr5	5998125	5998326	202	*	114	35.8	0	2.35	X5.5998225	AT5G18140	5998175	5999888	+	overlapStart	-50	50	Upstream
chr5	6006008	6006209	202	*	119	48	0	5.99	X5.6006108	AT5G18170	6006039	6008472	+	overlapStart	-31	31	Upstream
chr5	6017652	6017853	202	*	140	98.8	0	33.34	X5.6017752	AT5G18210	6017865	6019993	+	upstream	-213	12	Upstream
chr5	6061424	6061625	202	*	115	36.4	0	2.6	X5.6061524	AT5G18310	6061699	6063148	+	upstream	-275	74	Upstream
chr5	6066479	6066680	202	*	138	92	0	28.76	X5.6066579	AT5G18320	6064431	6066186	-	upstream	-293	293	Upstream
chr5	6089035	6089236	202	*	134	84	0	23.8	X5.6089135	AT5G18370	6085036	6088926	-	upstream	-109	109	Upstream
chr5	6105187	6105388	202	*	116	39	0	3.12	X5.6105287	AT5G18410	6097271	6105031	-	upstream	-156	156	Upstream
chr5	6112173	6112374	202	*	123	57	0	9.58	X5.6112273	AT5G18430	6110255	6112029	-	upstream	-144	144	Upstream
chr5	6112173	6112374	202	*	123	57	0	9.58	X5.6112273	AT5G18440	6112850	6115932	+	upstream	-677	476	Upstream
chr5	6166309	6166510	202	*	114	36.2	0	2.6	X5.6166409	AT5G18560	6164587	6165991	-	upstream	-318	318	Upstream
chr5	6246340	6246541	202	*	116	39.1	0	3.4	X5.6246440	AT5G18730	6246763	6249405	+	upstream	-423	222	Upstream
chr5	6260978	6261179	202	*	117	43	0	4.3	X5.6261078	AT5G18760	6258295	6260929	-	upstream	-49	49	Upstream
chr5	6260978	6261179	202	*	117	43	0	4.3	X5.6261078	AT5G18770	6261352	6263436	+	upstream	-374	173	Upstream
chr5	6282590	6282791	202	*	123	56	0	9.15	X5.6282690	AT5G18840	6282881	6286707	+	upstream	-291	90	Upstream
chr5	6460710	6460911	202	*	114	35	0	2.11	X5.6460810	AT5G19210	6461391	6463866	+	upstream	-681	480	Upstream
chr5	6508163	6508364	202	*	123	56.5	0	9.58	X5.6508263	AT5G19320	6505110	6507435	-	upstream	-728	728	Upstream
chr5	6606035	6606236	202	*	147	114	0	43.88	X5.6606135	AT5G19570	6606700	6607203	+	upstream	-665	464	Upstream
chr5	6726127	6726328	202	*	183	202.2	0	121.32	X5.6726227	AT5G19890	6724115	6725923	-	upstream	-204	204	Upstream
chr5	6743249	6743450	202	*	142	103.7	0	36.75	X5.6743349	AT5G19960	6743926	6746339	+	upstream	-677	476	Upstream
chr5	6794879	6795080	202	*	127	66	0	13.76	X5.6794979	AT5G20120	6795366	6797172	+	upstream	-487	286	Upstream
chr5	6807695	6807896	202	*	138	93.9	0	30.04	X5.6807795	AT5G20165	6805594	6807327	-	upstream	-368	368	Upstream
chr5	6943294	6943495	202	*	140	97.9	0	32.67	X5.6943394	AT5G20510	6939813	6942908	-	upstream	-386	386	Upstream
chr5	6981739	6981940	202	*	118	43.7	0	4.62	X5.6981839	AT5G20635	6979213	6981935	-	overlapStart	196	5	Upstream
chr5	6994360	6994561	202	*	118	44.8	0	4.95	X5.6994460	AT5G20670	6993114	6993873	-	upstream	-487	487	Upstream
chr5	7007524	7007725	202	*	119	48	0	5.99	X5.7007624	AT5G20700	7005844	7007117	-	upstream	-407	407	Upstream
chr5	7103235	7103436	202	*	145	108.7	0	40.26	X5.7103335	AT5G20935	7103470	7104023	+	upstream	-235	34	Upstream
chr5	7111164	7111365	202	*	127	66.5	0	14.25	X5.7111264	AT5G20950	7107376	7111349	-	overlapStart	185	16	Upstream
chr5	7128642	7128843	202	*	117	41.6	0	3.99	X5.7128742	AT5G20980	7122800	7128359	-	upstream	-283	283	Upstream
chr5	7135358	7135559	202	*	132	77.5	0	20.31	X5.7135458	AT5G21010	7136009	7138681	+	upstream	-651	450	Upstream
chr5	7138400	7138601	202	*	116	39	0	3.12	X5.7138500	AT5G21020	7138762	7139661	+	upstream	-362	161	Upstream
chr5	7167577	7167778	202	*	136	87.2	0	26.24	X5.7167677	AT5G21100	7168184	7170928	+	upstream	-607	406	Upstream
chr5	7216747	7216948	202	*	237	333	0	264.36	X5.7216847	AT5G21326	7217340	7222007	+	upstream	-593	392	Upstream
chr5	7288357	7288558	202	*	116	39.2	0	3.4	X5.7288457	AT5G22010	7280389	7287364	-	upstream	-993	993	Upstream
chr5	7358545	7358746	202	*	141	101	0	34.69	X5.7358645	AT5G22210	7358820	7359988	+	upstream	-275	74	Upstream
chr5	7394647	7394848	202	*	140	97.3	0	32.67	X5.7394747	AT5G22330	7390796	7394194	-	upstream	-453	453	Upstream
chr5	7433252	7433453	202	*	166	160.7	0	82.04	X5.7433352	AT5G22430	7433790	7434935	+	upstream	-538	337	Upstream
chr5	7496618	7496819	202	*	122	55	0	8.73	X5.7496718	AT5G22570	7495539	7496784	-	overlapStart	166	35	Upstream
chr5	7685141	7685342	202	*	131	75	0	18.63	X5.7685241	AT5G22960	7684014	7685052	-	upstream	-89	89	Upstream
chr5	7826873	7827074	202	*	115	38	0	2.85	X5.7826973	AT5G23230	7825882	7826611	-	upstream	-262	262	Upstream
chr5	7850843	7851044	202	*	119	48.1	0	5.23	X5.7850943	AT5G23300	7847587	7850404	-	upstream	-439	439	Upstream
chr5	7853832	7854033	202	*	120	49.9	0	6.73	X5.7853932	AT5G23330	7854129	7855813	+	upstream	-297	96	Upstream
chr5	7918755	7918956	202	*	188	213.4	0	132.27	X5.7918855	AT5G23490	7919438	7926628	+	upstream	-683	482	Upstream
chr5	8079694	8079895	202	*	173	177	0	96.5	X5.8079794	AT5G23940	8076329	8079793	-	overlapStart	99	99	Upstream
chr5	8096078	8096279	202	*	191	221.5	0	140.38	X5.8096178	AT5G23970	8096290	8097660	+	upstream	-212	11	Upstream
chr5	8154548	8154749	202	*	124	60	0	10.91	X5.8154648	AT5G24110	8153115	8154709	-	overlapStart	161	40	Upstream
chr5	8202999	8203200	202	*	161	148	0	70.8	X5.8203099	AT5G24200	8203003	8205793	+	overlapStart	-4	4	Upstream
chr5	8300730	8300931	202	*	155	134	0	59.25	X5.8300830	AT5G24350	8301105	8310895	+	upstream	-375	174	Upstream
chr5	8323350	8323551	202	*	145	109	0	40.26	X5.8323450	AT5G24380	8323895	8326705	+	upstream	-545	344	Upstream
chr5	8365174	8365375	202	*	127	67.3	0	14.74	X5.8365274	AT5G24480	8363831	8365036	-	upstream	-138	138	Upstream
chr5	8365540	8365741	202	*	167	162.7	0	83.81	X5.8365640	AT5G24490	8365601	8367460	+	overlapStart	-61	61	Upstream
chr5	8588555	8588756	202	*	116	40	0	3.4	X5.8588655	AT5G24930	8589234	8591236	+	upstream	-679	478	Upstream
chr5	8597780	8597981	202	*	131	75	0	19.19	X5.8597880	AT5G24950	8595209	8597761	-	upstream	-19	19	Upstream
chr5	8747228	8747429	202	*	114	35.9	0	2.35	X5.8747328	AT5G25240	8746605	8747197	-	upstream	-31	31	Upstream
chr5	8820414	8820615	202	*	115	36.6	0	2.6	X5.8820514	AT5G25390	8820476	8821992	+	overlapStart	-62	62	Upstream
chr5	8867608	8867809	202	*	127	65.3	0	13.76	X5.8867708	AT5G25470	8865651	8867685	-	overlapStart	77	77	Upstream
chr5	8869943	8870144	202	*	114	34.4	0	2.12	X5.8870043	AT5G25475	8867797	8869821	-	upstream	-122	122	Upstream
chr5	9107473	9107674	202	*	114	35.2	0	2.35	X5.9107573	AT5G26080	9107997	9108422	+	upstream	-524	323	Upstream
chr5	9155628	9155829	202	*	137	90.3	0	28.12	X5.9155728	AT5G26190	9153628	9155298	-	upstream	-330	330	Upstream
chr5	9156484	9156685	202	*	155	133.8	0	59.25	X5.9156584	AT5G26200	9157142	9158404	+	upstream	-658	457	Upstream
chr5	9261567	9261768	202	*	126	65	0	13.27	X5.9261667	AT5G26570	9261580	9267729	+	overlapStart	-13	13	Upstream
chr5	9350441	9350642	202	*	129	71	0	16.48	X5.9350541	AT5G26630	9350815	9351471	+	upstream	-374	173	Upstream
chr5	9318066	9318267	202	*	114	35.8	0	2.35	X5.9318166	AT5G26670	9318280	9320991	+	upstream	-214	13	Upstream
chr5	9294899	9295100	202	*	128	68.6	0	15.44	X5.9294999	AT5G26731	9295574	9296380	+	upstream	-675	474	Upstream
chr5	9423032	9423233	202	*	136	88	0	26.24	X5.9423132	AT5G26790	9423092	9423611	+	overlapStart	-60	60	Upstream
chr5	9470253	9470454	202	*	115	37	0	2.6	X5.9470353	AT5G26910	9465929	9470403	-	overlapStart	150	51	Upstream
chr5	9486167	9486368	202	*	116	39	0	3.12	X5.9486267	AT5G26960	9484734	9486149	-	upstream	-18	18	Upstream
chr5	9507912	9508113	202	*	124	59	0	10.46	X5.9508012	AT5G27010	9503315	9507569	-	upstream	-343	343	Upstream
chr5	9507912	9508113	202	*	124	59	0	10.46	X5.9508012	AT5G27020	9508098	9508878	+	overlapStart	-186	15	Upstream
chr5	9605559	9605760	202	*	116	39	0	3.12	X5.9605659	AT5G27270	9605650	9609787	+	overlapStart	-91	91	Upstream
chr5	9671453	9671654	202	*	121	51	0	7.11	X5.9671553	AT5G27380	9667971	9670962	-	upstream	-491	491	Upstream
chr5	10455555	10455756	202	*	164	156.8	0	78.53	X5.10455655	AT5G28490	10454393	10455196	-	upstream	-359	359	Upstream
chr5	10484153	10484354	202	*	129	72	0	17.01	X5.10484253	AT5G28510	10481041	10484022	-	upstream	-131	131	Upstream
chr5	10649813	10650014	202	*	114	36	0	2.35	X5.10649913	AT5G28640	10647570	10649892	-	overlapStart	79	79	Upstream
chr5	13312350	13312551	202	*	280	435.3	0	999	X5.13312450	AT5G35050	13311036	13311854	-	upstream	-496	496	Upstream
chr5	13434140	13434341	202	*	116	39	0	3.12	X5.13434240	AT5G35190	13434181	13435167	+	overlapStart	-41	41	Upstream
chr5	13667176	13667377	202	*	117	42	0	3.99	X5.13667276	AT5G35450	13667686	13671184	+	upstream	-510	309	Upstream
chr5	13726703	13726904	202	*	117	43	0	4.3	X5.13726803	AT5G35550	13726743	13727860	+	overlapStart	-40	40	Upstream
chr5	13771798	13771999	202	*	120	48.7	0	6.36	X5.13771898	AT5G35600	13770121	13771712	-	upstream	-86	86	Upstream
chr5	14048529	14048730	202	*	121	52	0	7.5	X5.14048629	AT5G35917	14049123	14051128	+	upstream	-594	393	Upstream
chr5	14141153	14141354	202	*	122	54	0	8.31	X5.14141253	AT5G36001	14141641	14143436	+	upstream	-488	287	Upstream
chr5	14253150	14253351	202	*	126	63.9	0	12.79	X5.14253250	AT5G36210	14247913	14253295	-	overlapStart	145	56	Upstream
chr5	14272822	14273023	202	*	114	35.4	0	2.35	X5.14272922	AT5G36230	14273384	14277026	+	upstream	-562	361	Upstream
chr5	14572782	14572983	202	*	115	37.6	0	2.86	X5.14572882	AT5G36930	14567622	14572630	-	upstream	-152	152	Upstream
chr5	14598562	14598763	202	*	177	186	0	104.92	X5.14598662	AT5G36960	14598693	14599988	+	overlapStart	-131	70	Upstream
chr5	14629977	14630178	202	*	119	47.5	0	5.99	X5.14630077	AT5G37020	14630028	14634387	+	overlapStart	-51	51	Upstream
chr5	14727039	14727240	202	*	125	61.1	0	11.84	X5.14727139	AT5G37190	14723144	14726694	-	upstream	-345	345	Upstream
chr5	14819358	14819559	202	*	138	92	0	28.76	X5.14819458	AT5G37380	14816759	14819296	-	upstream	-62	62	Upstream
chr5	14881274	14881475	202	*	248	358	0	294.76	X5.14881374	AT5G37478	14881560	14883989	+	upstream	-286	85	Upstream
chr5	15213529	15213730	202	*	116	39.3	0	3.4	X5.15213629	AT5G38120	15213765	15216205	+	upstream	-236	35	Upstream
chr5	15283032	15283233	202	*	114	35.8	0	2.35	X5.15283132	AT5G38250	15280643	15282709	-	upstream	-323	323	Upstream
chr5	15438759	15438960	202	*	114	34.1	0	2.12	X5.15438859	AT5G38560	15439249	15443164	+	upstream	-490	289	Upstream
chr5	15558730	15558931	202	*	154	131.1	0	57.65	X5.15558830	AT5G38860	15558956	15561126	+	upstream	-226	25	Upstream
chr5	15634580	15634781	202	*	114	35	0	2.12	X5.15634680	AT5G39050	15634586	15636065	+	overlapStart	-6	6	Upstream
chr5	15785692	15785893	202	*	119	48	0	5.99	X5.15785792	AT5G39450	15785717	15787946	+	overlapStart	-25	25	Upstream
chr5	15849530	15849731	202	*	115	37	0	2.6	X5.15849630	AT5G39580	15847078	15849108	-	upstream	-422	422	Upstream
chr5	15849530	15849731	202	*	115	37	0	2.6	X5.15849630	AT5G39581	15849155	15849301	-	upstream	-229	229	Upstream
chr5	16042066	16042267	202	*	126	62.9	0	12.31	X5.16042166	AT5G40080	16039945	16041623	-	upstream	-443	443	Upstream
chr5	16135101	16135302	202	*	122	54.9	0	8.73	X5.16135201	AT5G40340	16131654	16134916	-	upstream	-185	185	Upstream
chr5	16151209	16151410	202	*	114	34.2	0	2.12	X5.16151309	AT5G40380	16151772	16155177	+	upstream	-563	362	Upstream
chr5	16236656	16236857	202	*	123	56.8	0	9.58	X5.16236756	AT5G40540	16237298	16239601	+	upstream	-642	441	Upstream
chr5	16256768	16256969	202	*	115	38.6	0	3.12	X5.16256868	AT5G40600	16253469	16256829	-	overlapStart	61	61	Upstream
chr5	16356174	16356375	202	*	131	75	0	18.63	X5.16356274	AT5G40830	16354380	16356289	-	overlapStart	115	86	Upstream
chr5	16378294	16378495	202	*	120	49	0	6.36	X5.16378394	AT5G40880	16378895	16381335	+	upstream	-601	400	Upstream
chr5	16394867	16395068	202	*	152	125.6	0	52.94	X5.16394967	AT5G40910	16395507	16399129	+	upstream	-640	439	Upstream
chr5	16403973	16404174	202	*	115	37	0	2.6	X5.16404073	AT5G40930	16404457	16406002	+	upstream	-484	283	Upstream
chr5	16434413	16434614	202	*	126	62.9	0	12.31	X5.16434513	AT5G41050	16433317	16434318	-	upstream	-95	95	Upstream
chr5	16434413	16434614	202	*	126	62.9	0	12.31	X5.16434513	AT5G41060	16435322	16437699	+	upstream	-909	708	Upstream
chr5	16438239	16438440	202	*	120	50.1	0	7.12	X5.16438339	AT5G41070	16438307	16440046	+	overlapStart	-68	68	Upstream
chr5	16452839	16453040	202	*	152	127.7	0	54.49	X5.16452939	AT5G41109	16452453	16452593	-	upstream	-246	246	Upstream
chr5	16468428	16468629	202	*	126	64.2	0	13.28	X5.16468528	AT5G41140	16468434	16472810	+	overlapStart	-6	6	Upstream
chr5	16493849	16494050	202	*	125	60.9	0	11.37	X5.16493949	AT5G41210	16492320	16493994	-	overlapStart	145	56	Upstream
chr5	16507099	16507300	202	*	114	36	0	2.35	X5.16507199	AT5G41270	16507709	16508879	+	upstream	-610	409	Upstream
chr5	16514356	16514557	202	*	122	55	0	8.72	X5.16514456	AT5G41300	16515004	16516102	+	upstream	-648	447	Upstream
chr5	16669905	16670106	202	*	129	71	0	16.48	X5.16670005	AT5G41685	16669149	16669723	-	upstream	-182	182	Upstream
chr5	16760420	16760621	202	*	116	41	0	3.69	X5.16760520	AT5G41870	16758709	16760576	-	overlapStart	156	45	Upstream
chr5	16760420	16760621	202	*	116	41	0	3.69	X5.16760520	AT5G41880	16760908	16764276	+	upstream	-488	287	Upstream
chr5	16793118	16793319	202	*	136	88.9	0	26.86	X5.16793218	AT5G41980	16793614	16795006	+	upstream	-496	295	Upstream
chr5	16831158	16831359	202	*	119	46.2	0	5.64	X5.16831258	AT5G42100	16829151	16831239	-	overlapStart	81	81	Upstream
chr5	16836863	16837064	202	*	122	54	0	8.31	X5.16836963	AT5G42130	16835299	16836839	-	upstream	-24	24	Upstream
chr5	16880766	16880967	202	*	116	40.4	0	3.69	X5.16880866	AT5G42230	16880954	16884064	+	overlapStart	-188	13	Upstream
chr5	17022697	17022898	202	*	157	139.9	0	64.13	X5.17022797	AT5G42570	17021310	17022583	-	upstream	-114	114	Upstream
chr5	17148638	17148839	202	*	130	73	0	17.55	X5.17148738	AT5G42760	17148808	17150451	+	overlapStart	-170	31	Upstream
chr5	17154629	17154830	202	*	146	111.8	0	42.42	X5.17154729	AT5G42780	17154776	17155757	+	overlapStart	-147	54	Upstream
chr5	17257842	17258043	202	*	142	102	0	35.37	X5.17257942	AT5G43020	17255291	17257742	-	upstream	-100	100	Upstream
chr5	17328840	17329041	202	*	119	46	0	5.29	X5.17328940	AT5G43160	17329275	17331352	+	upstream	-435	234	Upstream
chr5	17355562	17355763	202	*	115	37.3	0	2.86	X5.17355662	AT5G43240	17352986	17355122	-	upstream	-440	440	Upstream
chr5	17385565	17385766	202	*	463	878.4	0	999	X5.17385665	AT5G43310	17379486	17385535	-	upstream	-30	30	Upstream
chr5	17530807	17531008	202	*	195	231	0	149.66	X5.17530907	AT5G43640	17531302	17532370	+	upstream	-495	294	Upstream
[truncated: 209 more rows]
