# Supplementary material for: ZAT10 regulates root thermomorphogenesis via very-long-chain fatty acids signaling
Source: Research Square preprint supplement (doi:10.21203/rs.3.rs-7128687/v1), 2025-07-23
Supplement: Supplementary file 2 [file 3e80ee82072460b2cc938a87.xlsx]

## Sheet: Col-0 22℃ vs 28℃(DEGs)
Dataset S1. Significantly differentially expressed genes between Col-0 and ksc1/2/20 grown at 22˚C
upregulated genes; 940 (singleton) , downregulated genes; 321 (singleton)
Reference ID	logFC Col-Root 22˚C vs 28˚C	adj_pvalue Col-0 Root 22˚C vs 28˚C	annotation
AT4G29770.1	7.36019	7.82e-13	unknown protein
AT4G29770.2	7.33578	1.46e-12	unknown protein
AT2G07722.1	7.24288	3.87e-12	unknown protein
AT1G12610.1	7.21797	0.000187964	Integrase-type DNA-binding superfamily protein
AT2G14560.1	7.14698	0.000218552	Protein of unknown function (DUF567)
AT2G14560.2	6.93054	0.000426993	Protein of unknown function (DUF567)
AT1G66860.1	6.83417	0.000561962	Class I glutamine amidotransferase-like superfamily protein
AT1G56250.1	6.53626	8.36e-05	phloem protein 2-B14
AT2G04190.1	6.48989	8.34e-06	TRAF-like family protein
AT2G17040.1	6.33911	1.25e-06	NAC domain containing protein 36
AT4G28850.1	6.26694	9.28e-14	xyloglucan endotransglucosylase/hydrolase 26
AT2G44840.1	6.19235	2.43e-08	ethylene-responsive element binding factor 13
AT5G40990.1	5.98094	2.17e-12	GDSL lipase 1
AT3G16930.1	5.9797	1.1e-05	unknown protein
AT3G44260.1	5.89685	3.09e-26	Polynucleotidyl transferase, ribonuclease H-like superfamily protein
AT5G59310.1	5.82671	2.88e-07	lipid transfer protein 4
AT1G56240.1	5.81542	2.98e-06	phloem protein 2-B13
AT4G11700.1	5.77415	4.03e-05	Protein of unknown function (DUF626)
AT4G22210.1	5.66419	1.34e-11	low-molecular-weight cysteine-rich 85
AT4G13420.1	5.6557	2.13e-11	high affinity K+ transporter 5
AT5G24770.1	5.62681	3e-32	vegetative storage protein 2
AT1G17420.1	5.62023	4.79e-09	lipoxygenase 3
AT5G42530.1	5.61598	0.00079915	unknown protein
AT1G74670.1	5.57473	6.84e-13	Gibberellin-regulated family protein
AT5G24770.2	5.56722	5.47e-32	vegetative storage protein 2
AT2G39850.1	5.52973	0.000177725	Subtilisin-like serine endopeptidase family protein
ATMG00170.1	5.47903	2.47e-11	unknown protein
ATMG00620.1	5.47903	2.47e-11	unknown protein
AT2G26380.1	5.40353	9.58e-05	Leucine-rich repeat (LRR) family protein
AT3G13680.1	5.36337	2.4e-10	F-box and associated interaction domains-containing protein
AT2G15050.2	5.34294	0.000528671	lipid transfer protein
AT3G26230.1	5.28338	2.07e-08	cytochrome P450, family 71, subfamily B, polypeptide 24
AT5G47000.1	5.19901	3.68e-13	Peroxidase superfamily protein
AT1G07135.1	5.16367	4.45e-15	glycine-rich protein
AT1G19210.1	5.14002	7.21e-05	Integrase-type DNA-binding superfamily protein
AT5G51190.1	5.11652	5.44e-17	Integrase-type DNA-binding superfamily protein
AT1G25240.1	5.1161	4.73e-09	ENTH/VHS/GAT family protein
AT3G55970.1	5.11242	0.000468643	jasmonate-regulated gene 21
AT1G35210.1	5.07188	1.32e-11	unknown protein
AT3G02840.1	5.07053	6.95e-10	ARM repeat superfamily protein
AT3G05770.1	5.02762	2.94e-09	unknown protein
AT2G27535.1	4.95987	7.6e-06	ribosomal protein L10A family protein
AT2G07749.1	4.78468	1.3e-07	Mitovirus RNA-dependent RNA polymerase
AT3G49620.1	4.74106	2.4e-05	2-oxoglutarate (2OG) and Fe(II)-dependent oxygenase superfamily protein
AT1G34540.1	4.62815	2.78e-10	cytochrome P450, family 94, subfamily D, polypeptide 1
AT2G07678.1	4.55668	4.5e-06	unknown protein
AT5G19890.1	4.52261	1.89e-10	Peroxidase superfamily protein
ATMG00920.1	4.50643	1e-05	unknown protein
AT1G35625.1	4.48761	4.69e-15	RING/U-box superfamily protein
AT5G39100.1	4.48253	2.61e-06	germin-like protein 6
AT4G27654.1	4.4311	1.59e-08	unknown protein
AT1G78750.1	4.38514	5.86e-20	F-box/RNI-like superfamily protein
AT5G42380.1	4.3752	1.43e-06	calmodulin like 37
AT3G22860.1	4.34767	2.31e-05	eukaryotic translation initiation factor 3 subunit C2
AT5G07060.1	4.3126	7.43e-08	CCCH-type zinc fingerfamily protein with RNA-binding domain
AT5G07060.2	4.31255	7.06e-08	CCCH-type zinc fingerfamily protein with RNA-binding domain
AT4G24570.1	4.2937	4.47e-19	dicarboxylate carrier 2
AT3G05950.1	4.29351	5.05e-10	RmlC-like cupins superfamily protein
AT1G15010.1	4.29236	4.98e-13	unknown protein
AT4G23990.1	4.29014	4.84e-05	cellulose synthase like G3
AT2G33070.3	4.27039	0.000878136	nitrile specifier protein 2
AT4G13395.1	4.25554	8.12e-08	ROTUNDIFOLIA like 12
AT3G23250.2	4.22877	2.64e-08	myb domain protein 15
AT1G32970.1	4.22693	6.6e-07	Subtilisin-like serine endopeptidase family protein
AT2G22860.1	4.2165	5.7e-54	phytosulfokine 2 precursor
AT2G20520.1	4.21362	1.39e-10	FASCICLIN-like arabinogalactan 6
AT2G28860.1	4.202	2.06e-13	cytochrome P450, family 710, subfamily A, polypeptide 4
AT3G23250.1	4.16313	2.91e-08	myb domain protein 15
AT3G29000.1	4.15605	3.79e-12	Calcium-binding EF-hand family protein
AT5G01300.2	4.14071	0.000365318	PEBP (phosphatidylethanolamine-binding protein) family protein
AT5G61740.1	4.10025	0.000409398	ABC2 homolog 14
AT5G47600.1	4.09953	1e-14	HSP20-like chaperones superfamily protein
AT3G02620.1	4.09943	3.91e-41	Plant stearoyl-acyl-carrier-protein desaturase family protein
AT1G34510.1	4.09501	9.21e-12	Peroxidase superfamily protein
AT1G27730.1	4.06814	4.6e-17	salt tolerance zinc finger
AT4G25490.1	4.03314	0.00049124	C-repeat/DRE binding factor 1
AT1G74930.1	3.98665	1e-10	Integrase-type DNA-binding superfamily protein
AT5G64870.1	3.97618	1.67e-08	SPFH/Band 7/PHB domain-containing membrane-associated protein family
AT3G27710.1	3.96934	1.44e-08	RING/U-box superfamily protein
AT3G29252.1	3.93105	1.64e-06	pseudogene
ATMG00050.1	3.92204	9.79e-11	unknown protein
AT4G27300.1	3.90742	2.13e-07	S-locus lectin protein kinase family protein
AT5G40000.1	3.90073	4.7e-07	P-loop containing nucleoside triphosphate hydrolases superfamily protein
ATMG00940.1	3.88413	0.000864616	DNA binding
AT1G60970.1	3.86224	7.05e-05	SNARE-like superfamily protein
AT1G34140.1	3.83702	3.57e-05	poly(A) binding protein 1
AT2G07677.1	3.83662	4.16e-22	pseudogene
ATMG00590.1	3.83189	1.7e-15	Cytochrome b/b6 protein
AT2G07718.1	3.83189	1.7e-15	Cytochrome b/b6 protein
AT2G07732.1	3.7999	0.000833847	Ribulose bisphosphate carboxylase large chain, catalytic domain
ATMG01370.1	3.7847	5.54e-12	unknown protein
AT2G28850.1	3.73753	2.03e-10	cytochrome P450, family 710, subfamily A, polypeptide 3
ATMG00810.1	3.73652	0.000103359	DNA/RNA polymerases superfamily protein
AT5G52670.1	3.73143	6.32e-05	Copper transport protein family
AT2G41451.1	3.73011	2.65e-05	unknown protein
AT2G46400.1	3.70984	5.51e-05	WRKY DNA-binding protein 46
AT1G80840.1	3.70966	5.4e-08	WRKY DNA-binding protein 40
ATMG00516.1	3.70079	4.76e-06	NADH dehydrogenase 1C
AT4G22710.1	3.68365	9.28e-42	cytochrome P450, family 706, subfamily A, polypeptide 2
AT5G57560.1	3.67786	1.27e-10	Xyloglucan endotransglucosylase/hydrolase family protein
AT1G54970.1	3.65824	8.12e-08	proline-rich protein 1
AT4G22690.1	3.65707	3.04e-43	cytochrome P450, family 706, subfamily A, polypeptide 1
AT1G21270.1	3.6252	1.62e-15	wall-associated kinase 2
AT5G47220.1	3.61885	5.8e-23	ethylene responsive element binding factor 2
AT1G23730.1	3.61859	3.9e-15	beta carbonic anhydrase 3
AT3G23240.1	3.61273	1.07e-07	ethylene response factor 1
AT1G62262.1	3.5888	5.25e-24	SLAC1 homologue 4
AT2G47190.1	3.5833	2.29e-05	myb domain protein 2
AT5G22530.1	3.57605	0.000277458	unknown protein
AT4G10250.1	3.56272	0.000347393	HSP20-like chaperones superfamily protein
ATMG00180.1	3.52722	6.84e-27	cytochrome C biogenesis 452
AT5G22570.1	3.52549	2.59e-08	WRKY DNA-binding protein 38
AT2G07689.1	3.50297	0.00073608	NADH-Ubiquinone/plastoquinone (complex I) protein
AT5G06720.1	3.49934	8.24e-19	peroxidase 2
AT5G03840.1	3.49389	7.5e-31	PEBP (phosphatidylethanolamine-binding protein) family protein
AT1G52000.1	3.47356	7.67e-11	Mannose-binding lectin superfamily protein
AT5G17350.1	3.45264	6.8e-19	unknown protein
AT5G10380.1	3.45055	3.28e-10	RING/U-box superfamily protein
AT5G38410.3	3.40139	9.53e-16	Ribulose bisphosphate carboxylase (small chain) family protein
AT3G21520.1	3.39835	4.64e-09	DUF679 domain membrane protein 1
AT2G07786.1	3.39	6.56e-05	pseudogene
AT4G27280.1	3.38985	1.26e-10	Calcium-binding EF-hand family protein
AT5G67060.1	3.37128	0.000215699	basic helix-loop-helix (bHLH) DNA-binding superfamily protein
AT2G07599.2	3.37012	1.28e-05	unknown protein
AT1G65500.1	3.34942	1.84e-09	unknown protein
AT1G72660.1	3.33863	4.02e-25	P-loop containing nucleoside triphosphate hydrolases superfamily protein
AT2G03020.1	3.32418	3.48e-05	Heat shock protein HSP20/alpha crystallin family
AT5G38410.1	3.31916	1.12e-15	Ribulose bisphosphate carboxylase (small chain) family protein
AT5G36270.1	3.3148	2.09e-06	pseudogene
AT2G07707.1	3.30387	5.91e-15	Plant mitochondrial ATPase, F0 complex, subunit 8 protein
ATMG00480.1	3.30387	5.91e-15	Plant mitochondrial ATPase, F0 complex, subunit 8 protein
AT1G72660.3	3.3026	2.31e-23	P-loop containing nucleoside triphosphate hydrolases superfamily protein
AT5G38410.2	3.29952	3.79e-15	Ribulose bisphosphate carboxylase (small chain) family protein
AT1G66970.1	3.29136	5.03e-13	SHV3-like 2
AT1G18300.1	3.2886	3.6e-21	nudix hydrolase homolog 4
AT5G58680.1	3.28737	1.22e-06	ARM repeat superfamily protein
AT5G38430.1	3.28154	7.88e-13	Ribulose bisphosphate carboxylase (small chain) family protein
AT3G07920.1	3.27546	8.06e-05	Translation initiation factor IF2/IF5
AT1G66970.2	3.27173	8.84e-13	SHV3-like 2
AT5G42230.1	3.25036	1.31e-09	serine carboxypeptidase-like 41
AT2G07599.1	3.24939	0.000734062	unknown protein
AT1G72660.2	3.23538	4.16e-23	P-loop containing nucleoside triphosphate hydrolases superfamily protein
AT5G52320.1	3.22854	6.52e-15	cytochrome P450, family 96, subfamily A, polypeptide 4
AT2G03020.2	3.22573	8.55e-05	Heat shock protein HSP20/alpha crystallin family
ATMG00110.1	3.20653	1.71e-06	cytochrome C biogenesis 206
AT2G24600.4	3.20522	7.79e-14	Ankyrin repeat family protein
AT2G07811.1	3.19286	1.5e-44	pseudogene
AT2G24600.3	3.18302	8.28e-14	Ankyrin repeat family protein
AT5G64190.1	3.17229	1.99e-07	unknown protein
AT5G57640.1	3.17216	1.65e-05	GCK domain-containing protein
AT3G56710.1	3.16859	4.07e-10	sigma factor binding protein 1
AT5G52050.1	3.16099	4.9e-05	MATE efflux family protein
AT2G35990.2	3.13515	3.83e-06	Putative lysine decarboxylase family protein
AT2G07774.1	3.13196	1.29e-05	unknown protein
AT2G35990.3	3.1313	5.97e-06	Putative lysine decarboxylase family protein
ATMG00640.1	3.13089	5.06e-06	hydrogen ion transporting ATP synthases, rotational mechanism;zinc ion binding
AT2G24600.2	3.12677	1.63e-12	Ankyrin repeat family protein
AT5G20240.1	3.11659	2e-17	K-box region and MADS-box transcription factor family protein
AT3G20810.2	3.10245	3.07e-53	2-oxoglutarate (2OG) and Fe(II)-dependent oxygenase superfamily protein
AT5G54250.3	3.10048	5.75e-07	cyclic nucleotide-gated cation channel 4
AT2G24600.1	3.09973	1.53e-12	Ankyrin repeat family protein
AT3G20810.1	3.09838	1.24e-52	2-oxoglutarate (2OG) and Fe(II)-dependent oxygenase superfamily protein
AT1G07440.2	3.09634	1.52e-17	NAD(P)-binding Rossmann-fold superfamily protein
AT3G20810.3	3.09188	2.78e-53	2-oxoglutarate (2OG) and Fe(II)-dependent oxygenase superfamily protein
ATMG00690.1	3.07915	2.52e-22	unknown protein
AT2G07688.1	3.07118	2.32e-10	pseudogene
AT1G28370.1	3.06355	1.46e-14	ERF domain protein 11
AT1G13790.1	3.05799	1.94e-12	XH/XS domain-containing protein
AT3G50930.1	3.03453	9.12e-17	cytochrome BC1 synthesis
AT1G07440.1	3.03004	1.72e-18	NAD(P)-binding Rossmann-fold superfamily protein
AT1G78490.1	3.02528	4.98e-21	cytochrome P450, family 708, subfamily A, polypeptide 3
AT5G53820.1	3.02069	3.2e-10	Late embryogenesis abundant protein (LEA) family protein
AT5G07570.1	3.01852	1.99e-17	glycine/proline-rich protein
AT3G27620.1	3.0045	4.49e-06	alternative oxidase 1C
AT5G60350.1	3.00162	0.000167541	unknown protein
ATMG00830.1	2.97829	3e-06	cytochrome C biogenesis 382
AT1G76650.2	2.9678	1.18e-08	calmodulin-like 38
ATMG00370.1	2.95244	6.84e-13	Ycf1 protein
AT1G64710.2	2.94564	0.000487529	GroES-like zinc-binding dehydrogenase family protein
AT1G64710.1	2.9456	0.000483026	GroES-like zinc-binding dehydrogenase family protein
ATMG00410.1	2.93803	1.13e-12	ATPase subunit 6-1
AT4G13390.1	2.90525	8.19e-08	Proline-rich extensin-like family protein
AT2G07779.1	2.90261	1.03e-05	unknown protein
AT2G07739.1	2.8941	4.67e-13	Ycf1 protein
AT2G07671.1	2.89237	3.62e-26	ATP synthase subunit C family protein
AT5G27360.1	2.88764	5.22e-11	Major facilitator superfamily protein
AT2G37870.1	2.88388	9.55e-14	Bifunctional inhibitor/lipid-transfer protein/seed storage 2S albumin superfamily protein
AT5G57540.1	2.87696	1.78e-05	xyloglucan endotransglucosylase/hydrolase 13
AT5G18910.1	2.87392	5.77e-07	Protein kinase superfamily protein
AT4G34410.1	2.86894	2.07e-08	redox responsive transcription factor 1
AT2G07706.1	2.85974	4.48e-08	unknown protein
AT4G37850.1	2.85428	4.35e-19	basic helix-loop-helix (bHLH) DNA-binding superfamily protein
AT2G38255.1	2.85427	0.000236637	Protein of Unknown Function (DUF239)
AT1G72520.1	2.85002	3.88e-07	PLAT/LH2 domain-containing lipoxygenase family protein
AT2G07741.1	2.83274	4.78e-11	ATPase, F0 complex, subunit A protein
ATMG01080.1	2.82992	6.46e-30	mitochondrial F0-ATPase subunit 9
AT1G10770.1	2.825	1.26e-09	Plant invertase/pectin methylesterase inhibitor superfamily protein
AT3G10930.1	2.82087	4.19e-15	unknown protein
AT3G16530.1	2.81191	8.14e-19	Legume lectin family protein
AT1G52400.2	2.78701	1.15e-13	beta glucosidase 18
AT1G76650.1	2.78528	4.73e-08	calmodulin-like 38
AT2G07699.1	2.78127	8.6e-11	pseudogene
AT1G73040.1	2.77934	1.7e-10	Mannose-binding lectin superfamily protein
AT3G45960.1	2.77352	3.38e-11	expansin-like A3
AT3G21720.1	2.76766	0.000487656	isocitrate lyase
AT1G19960.1	2.7673	2.27e-22	unknown protein
AT2G07783.1	2.76606	1.65e-13	pseudogene
AT1G52400.1	2.76117	1.83e-13	beta glucosidase 18
AT1G61470.1	2.75528	4.06e-05	Polynucleotidyl transferase, ribonuclease H-like superfamily protein
AT5G28610.1	2.75213	8.53e-11	unknown protein
AT2G07787.1	2.74982	2.71e-10	unknown protein
ATMG01090.1	2.747	2.03e-18	ATP synthase 9 mitochondrial
AT5G54250.2	2.74646	1.87e-06	cyclic nucleotide-gated cation channel 4
AT1G06520.1	2.71945	7e-06	glycerol-3-phosphate acyltransferase 1
ATMG00160.1	2.71895	2.73e-12	cytochrome oxidase 2
AT5G54250.1	2.71403	2.72e-06	cyclic nucleotide-gated cation channel 4
ATMG01320.1	2.71126	4.02e-05	NADH dehydrogenase 2B
AT2G07777.1	2.71101	2.25e-16	ATP synthase 9 mitochondrial
AT3G28580.1	2.70852	0.000457234	P-loop containing nucleoside triphosphate hydrolases superfamily protein
AT1G70720.1	2.70337	2e-05	Plant invertase/pectin methylesterase inhibitor superfamily protein
AT1G76650.3	2.70128	1.73e-07	calmodulin-like 38
AT3G45960.2	2.70074	1.02e-10	expansin-like A3
AT2G07696.1	2.69701	7.09e-08	Ribosomal protein S7p/S5e family protein
AT2G21330.2	2.69248	4.31e-22	fructose-bisphosphate aldolase 1
AT1G52400.3	2.68944	1.52e-12	beta glucosidase 18
AT2G35990.1	2.68308	0.00011504	Putative lysine decarboxylase family protein
AT4G29780.1	2.68004	8.14e-10	unknown protein
ATMG01170.1	2.67795	5.19e-14	ATPase, F0 complex, subunit A protein
AT3G24780.1	2.67542	1.25e-06	Uncharacterised conserved protein UCP015417, vWA
AT1G31990.1	2.67309	3.01e-05	unknown protein
AT2G07695.1	2.66703	5.74e-06	Cytochrome C oxidase subunit II-like, transmembrane domain
AT1G74810.1	2.66638	2.32e-07	HCO3- transporter family
AT5G21130.1	2.6649	0.00042351	Late embryogenesis abundant (LEA) hydroxyproline-rich glycoprotein family
AT3G13840.1	2.65357	3.19e-18	GRAS family transcription factor
AT2G21330.3	2.63845	5.67e-22	fructose-bisphosphate aldolase 1
AT3G61920.1	2.63401	0.000384449	unknown protein
AT2G03310.1	2.6338	0.000924576	unknown protein
AT2G27550.1	2.63131	5.67e-22	centroradialis
AT1G75160.1	2.63088	1.8e-06	Protein of unknown function (DUF620)
AT1G29540.1	2.62417	1.93e-05	unknown protein
AT2G44080.1	2.61736	1.77e-12	ARGOS-like
AT2G07674.1	2.6148	1.56e-07	Unknown conserved protein
AT2G21330.1	2.61284	1.09e-21	fructose-bisphosphate aldolase 1
AT3G50060.1	2.60495	3.72e-08	myb domain protein 77
AT5G09570.1	2.59991	6.07e-07	Cox19-like CHCH family protein
AT4G19680.2	2.59907	9.63e-08	iron regulated transporter 2
ATMG00730.1	2.5943	9.56e-08	cytochrome c oxidase subunit 3
AT4G19680.1	2.58964	5.42e-08	iron regulated transporter 2
AT3G16770.1	2.58845	8.61e-25	ethylene-responsive element binding protein
AT3G43930.2	2.58565	8.63e-07	BRCT domain-containing DNA repair protein
ATMG00040.1	2.57763	1.96e-13	ATP synthase subunit C family protein
AT1G72920.1	2.57692	6.79e-11	Toll-Interleukin-Resistance (TIR) domain family protein
AT4G14860.1	2.57042	7.66e-05	ovate family protein 11
ATMG00670.1	2.56705	3.39e-06	unknown protein
AT4G21490.1	2.5539	0.000628263	NAD(P)H dehydrogenase B3
AT4G24420.1	2.55366	6.17e-05	RNA-binding (RRM/RBD/RNP motifs) family protein
AT4G13190.1	2.55098	1.96e-06	Protein kinase superfamily protein
AT3G55980.1	2.55094	9.22e-11	salt-inducible zinc finger 1
AT1G50750.1	2.54983	4.3e-05	Plant mobile domain protein family
AT3G23290.2	2.54923	8.24e-15	Protein of unknown function (DUF640)
ATMG00210.1	2.54876	4.34e-07	ribosomal protein L5
ATMG01280.1	2.54768	6.33e-06	Cytochrome C oxidase subunit II-like, transmembrane domain
AT5G57530.1	2.54334	0.000106581	xyloglucan endotransglucosylase/hydrolase 12
AT4G15150.1	2.52537	6.86e-06	glycine-rich protein
AT5G66670.2	2.51969	7.12e-09	Protein of unknown function (DUF677)
AT5G48570.1	2.51733	1.24e-60	FKBP-type peptidyl-prolyl cis-trans isomerase family protein
AT2G07725.1	2.50766	2.13e-11	Ribosomal L5P family protein
AT4G33970.1	2.50476	1.09e-13	Leucine-rich repeat (LRR) family protein
AT3G28500.1	2.50436	2.48e-05	60S acidic ribosomal protein family
AT3G08810.1	2.50425	0.000980212	Galactose oxidase/kelch repeat superfamily protein
AT5G45960.1	2.50092	7.61e-06	GDSL-like Lipase/Acylhydrolase superfamily protein
AT1G23840.1	2.49738	6.72e-05	unknown protein
AT1G65860.1	2.49231	3.06e-07	flavin-monooxygenase glucosinolate S-oxygenase 1
AT1G43800.1	2.48912	5.94e-05	Plant stearoyl-acyl-carrier-protein desaturase family protein
AT1G79860.1	2.47963	3.43e-06	RHO guanyl-nucleotide exchange factor 12
AT1G35140.1	2.47528	3.06e-06	Phosphate-responsive 1 family protein
AT3G59900.1	2.47207	4.06e-08	auxin-regulated gene involved in organ size
AT4G25220.1	2.46962	5.26e-07	root hair specific 15
AT1G48400.1	2.46872	8.19e-05	F-box/RNI-like/FBD-like domains-containing protein
AT5G58610.1	2.46308	1.65e-11	PHD finger transcription factor, putative
AT5G66670.1	2.46233	1.95e-08	Protein of unknown function (DUF677)
AT5G56840.1	2.46191	2.73e-05	myb-like transcription factor family protein
AT5G66150.1	2.45907	0.000866132	Glycosyl hydrolase family 38 protein
AT5G49630.1	2.45276	4e-39	amino acid permease 6
AT2G43660.1	2.44799	4.18e-10	Carbohydrate-binding X8 domain superfamily protein
AT5G54490.1	2.44768	6.79e-09	pinoid-binding protein 1
AT1G61340.1	2.44372	5.92e-08	F-box family protein
AT5G24160.1	2.43978	1.9e-12	squalene monoxygenase 6
AT4G32340.1	2.43617	2.06e-24	Tetratricopeptide repeat (TPR)-like superfamily protein
AT3G01870.1	2.43276	0.000215095	Plant protein of unknown function (DUF946)
AT1G66830.1	2.43145	4.36e-05	Leucine-rich repeat protein kinase family protein
AT1G15772.1	2.42098	0.000106312	unknown protein
AT2G36660.1	2.41689	1.52e-07	poly(A) binding protein 7
AT3G46230.1	2.41503	5.4e-06	heat shock protein 17.4
AT2G43660.2	2.41441	2.12e-10	Carbohydrate-binding X8 domain superfamily protein
AT1G34044.1	2.40913	0.000260703	pseudogene
AT5G44980.1	2.40796	6.16e-12	F-box/RNI-like/FBD-like domains-containing protein
ATMG00560.1	2.39927	2.18e-06	Nucleic acid-binding, OB-fold-like protein
AT1G18570.1	2.39534	1.48e-14	myb domain protein 51
AT3G23150.1	2.38835	7.44e-16	Signal transduction histidine kinase, hybrid-type, ethylene sensor
AT1G73540.1	2.38475	1.47e-11	nudix hydrolase homolog 21
AT5G22250.1	2.38441	3.92e-26	Polynucleotidyl transferase, ribonuclease H-like superfamily protein
ATMG01270.1	2.38	7.47e-05	mitochondrial ribosomal protein S7
AT2G07815.1	2.37843	0.000237992	unknown protein
AT4G02270.1	2.3769	1.98e-11	root hair specific 13
AT3G53310.1	2.37612	9.61e-10	AP2/B3-like transcriptional factor family protein
AT2G26530.2	2.37188	3.06e-19	Protein of unknown function (DUF1645)
AT1G61340.2	2.37156	9.11e-08	F-box family protein
AT1G51440.1	2.35909	3.11e-19	alpha/beta-Hydrolases superfamily protein
AT5G10180.1	2.35673	6e-27	slufate transporter 2;1
AT2G26530.1	2.35573	3.17e-20	Protein of unknown function (DUF1645)
ATMG01010.1	2.34875	0.00015639	Unknown conserved protein
AT2G45940.1	2.33518	0.000252049	Protein of unknown function (DUF295)
AT1G64260.1	2.33445	0.000381407	MuDR family transposase
AT1G77760.1	2.33422	3.31e-21	nitrate reductase 1
AT2G07734.1	2.32793	1.44e-05	Alpha-L RNA-binding motif/Ribosomal protein S4 family protein
AT5G07572.1	2.32654	0.000330283	unknown protein
AT2G07727.1	2.32562	1.61e-06	Di-haem cytochrome, transmembrane;Cytochrome b/b6, C-terminal
AT4G21650.1	2.31977	3.7e-15	Subtilase family protein
AT2G41100.1	2.31761	1.23e-07	Calcium-binding EF hand family protein
AT2G41100.2	2.31556	2.75e-07	Calcium-binding EF hand family protein
AT2G41100.4	2.30928	1.97e-07	Calcium-binding EF hand family protein
ATMG00290.1	2.30111	2.23e-05	mitochondrial ribosomal protein S4
AT2G41100.3	2.29972	1.76e-07	Calcium-binding EF hand family protein
AT5G63160.1	2.29506	4.02e-15	BTB and TAZ domain protein 1
AT1G48325.1	2.28864	0.00027677	Expressed protein
AT4G23180.1	2.28654	2.81e-12	cysteine-rich RLK (RECEPTOR-like protein kinase) 10
AT4G30270.1	2.28494	3.68e-19	xyloglucan endotransglucosylase/hydrolase 24
AT2G20800.1	2.28489	0.000195388	NAD(P)H dehydrogenase B4
AT4G12290.1	2.26552	9.55e-08	Copper amine oxidase family protein
AT1G73805.1	2.26238	0.000893989	Calmodulin binding protein-like
AT2G32740.1	2.26048	8.02e-10	galactosyltransferase 13
AT1G01453.1	2.25435	0.000629658	unknown protein
AT5G20230.1	2.24691	3.26e-07	blue-copper-binding protein
AT3G49832.1	2.23856	0.000349127	pseudogene
AT1G08430.1	2.23624	3.91e-17	aluminum-activated malate transporter 1
AT1G76100.1	2.23349	3.6e-14	plastocyanin 1
AT2G23010.2	2.23203	2.03e-05	serine carboxypeptidase-like 9
AT5G61290.1	2.22757	1.05e-12	Flavin-binding monooxygenase family protein
AT5G16030.3	2.22368	1.83e-10	unknown protein
AT5G22410.1	2.22206	0.000616583	root hair specific 18
AT5G52390.1	2.22017	0.000751529	PAR1 protein
AT3G47030.1	2.21122	3.94e-05	F-box and associated interaction domains-containing protein
AT3G32040.1	2.19912	7.03e-22	Terpenoid synthases superfamily protein
AT4G23340.1	2.19647	2.13e-10	2-oxoglutarate (2OG) and Fe(II)-dependent oxygenase superfamily protein
AT5G66640.2	2.186	1.73e-06	DA1-related protein 3
AT5G60100.2	2.18493	7.04e-21	pseudo-response regulator 3
AT5G24280.1	2.18257	5.35e-25	gamma-irradiation and mitomycin c induced 1
AT5G05840.1	2.18176	0.000138171	Protein of unknown function (DUF620)
AT4G08620.1	2.17906	3.94e-06	sulphate transporter 1;1
AT1G66020.1	2.17442	4.2e-30	Terpenoid cyclases/Protein prenyltransferases superfamily protein
AT4G33730.1	2.16774	1.44e-05	CAP (Cysteine-rich secretory proteins, Antigen 5, and Pathogenesis-related 1 protein) superfamily protein
AT1G01453.2	2.16505	0.000746069	unknown protein
AT5G59570.1	2.16245	1.97e-26	Homeodomain-like superfamily protein
AT2G07687.1	2.16006	0.000351534	Cytochrome c oxidase, subunit III
ATMG00980.1	2.15834	3.81e-06	Ribosomal protein S12/S23 family protein
AT2G07675.1	2.15834	3.81e-06	Ribosomal protein S12/S23 family protein
ATCG01000.1	2.15762	5.73e-05	Ycf1 protein
AT3G21000.1	2.15619	1.24e-06	Gag-Pol-related retrotransposon family protein
AT3G43930.1	2.15483	7.61e-06	BRCT domain-containing DNA repair protein
AT2G07698.1	2.15397	9.25e-27	ATPase, F1 complex, alpha subunit protein
AT5G37440.1	2.15376	2.41e-19	Chaperone DnaJ-domain superfamily protein
AT4G33980.1	2.15329	6.09e-19	unknown protein
AT1G50400.1	2.15011	1.98e-13	Eukaryotic porin family protein
AT4G23340.2	2.14798	1.32e-09	2-oxoglutarate (2OG) and Fe(II)-dependent oxygenase superfamily protein
AT5G60100.1	2.14691	3.81e-20	pseudo-response regulator 3
AT2G07723.1	2.14662	2.5e-24	pseudogene
AT4G24110.1	2.14485	1.72e-10	unknown protein
ATMG01190.1	2.14345	5.19e-23	ATP synthase subunit 1
AT1G61550.1	2.1428	1.03e-06	S-locus lectin protein kinase family protein
AT4G17090.1	2.1377	0.000279139	chloroplast beta-amylase
ATMG00990.1	2.13597	1.57e-05	NADH dehydrogenase 3
AT2G07751.1	2.13589	1.81e-05	NADH:ubiquinone/plastoquinone oxidoreductase, chain 3 protein
AT3G49960.1	2.13557	0.000131442	Peroxidase superfamily protein
AT4G26520.1	2.13351	3.22e-06	Aldolase superfamily protein
AT5G60100.3	2.13214	2.94e-19	pseudo-response regulator 3
AT5G43620.1	2.12604	2.07e-09	Pre-mRNA cleavage complex II
AT3G29810.1	2.12483	1.01e-21	COBRA-like protein 2 precursor
AT2G38100.1	2.12313	0.00031198	proton-dependent oligopeptide transport (POT) family protein
ATMG01200.1	2.11212	9.48e-09	unknown protein
AT4G23260.1	2.11031	2.08e-08	cysteine-rich RLK (RECEPTOR-like protein kinase) 18
AT1G24140.1	2.10832	5.36e-06	Matrixin family protein
AT2G26740.1	2.10388	7.22e-18	soluble epoxide hydrolase
AT4G18197.1	2.09835	1.17e-12	purine permease 7
AT4G23170.1	2.09758	1.14e-05	receptor-like protein kinase-related family protein
AT5G16030.1	2.09604	4.73e-10	unknown protein
AT4G17490.1	2.09178	1.08e-07	ethylene responsive element binding factor 6
AT5G14360.1	2.0897	6.32e-08	Ubiquitin-like superfamily protein
AT3G53200.1	2.08941	0.00044937	myb domain protein 27
AT4G23515.1	2.08886	7.11e-09	Toll-Interleukin-Resistance (TIR) domain family protein
AT3G61190.2	2.08251	4.94e-10	BON association protein 1
AT3G18610.1	2.08102	2.46e-23	nucleolin like 2
AT4G25470.1	2.08057	4.41e-05	C-repeat/DRE binding factor 2
AT2G39980.1	2.07628	4.12e-09	HXXXD-type acyl-transferase family protein
AT3G61190.1	2.07224	4.31e-10	BON association protein 1
AT5G07571.1	2.06716	0.000625374	Oleosin family protein
ATMG01000.1	2.058	3.94e-05	unknown protein
AT5G09290.1	2.05177	1.86e-21	Inositol monophosphatase family protein
AT3G55720.1	2.04714	8.84e-13	Protein of unknown function (DUF620)
AT2G20720.1	2.04705	4.35e-08	Pentatricopeptide repeat (PPR) superfamily protein
AT1G19380.1	2.04422	1.51e-08	Protein of unknown function (DUF1195)
AT4G23260.2	2.03707	1.09e-07	cysteine-rich RLK (RECEPTOR-like protein kinase) 18
AT4G13310.2	2.03266	0.000456265	cytochrome P450, family 71, subfamily A, polypeptide 20
ATMG01360.1	2.02956	2.19e-09	cytochrome oxidase
AT2G25735.1	2.02867	5.78e-07	unknown protein
AT5G66640.1	2.01965	6.95e-05	DA1-related protein 3
AT1G26360.1	2.01545	0.000761716	methyl esterase 13
AT5G03310.1	2.01006	1.28e-06	SAUR-like auxin-responsive protein family
AT1G17380.1	2.00086	5.43e-06	jasmonate-zim-domain protein 5
AT5G45150.1	1.98959	2.51e-07	RNAse THREE-like protein 3
ATMG00220.1	1.98911	0.000311256	apocytochrome b
AT2G07708.1	1.98866	8.88e-07	unknown protein
AT4G27652.1	1.98856	1.21e-10	unknown protein
AT3G03776.1	1.98458	0.000419441	hydroxyproline-rich glycoprotein family protein
AT2G39310.2	1.98382	4.46e-23	jacalin-related lectin 22
AT2G39310.3	1.98373	2.16e-23	jacalin-related lectin 22
AT4G33980.2	1.98321	2.72e-15	unknown protein
AT2G39310.1	1.97928	4.12e-23	jacalin-related lectin 22
AT3G50470.1	1.979	3.61e-14	homolog of RPW8 3
AT3G61280.2	1.97851	1.44e-07	Arabidopsis thaliana protein of unknown function (DUF821)
AT3G61280.1	1.97527	2.4e-08	Arabidopsis thaliana protein of unknown function (DUF821)
AT5G06630.1	1.97211	0.000685352	proline-rich extensin-like family protein
AT1G14480.1	1.96932	3.35e-07	Ankyrin repeat family protein
AT5G18340.1	1.9669	4.89e-05	ARM repeat superfamily protein
AT1G14480.2	1.96568	1.04e-06	Ankyrin repeat family protein
AT5G63090.1	1.96355	0.000206081	Lateral organ boundaries (LOB) domain family protein
AT5G61600.1	1.9598	1.19e-05	ethylene response factor 104
AT1G70830.3	1.95871	6.71e-10	MLP-like protein 28
AT5G16030.2	1.95842	8.04e-09	unknown protein
AT3G10120.1	1.95634	4.58e-18	unknown protein
AT2G18210.1	1.95175	1.86e-41	unknown protein
AT5G52640.1	1.94151	2.62e-14	heat shock protein 90.1
AT5G38420.1	1.93901	4.6e-05	Ribulose bisphosphate carboxylase (small chain) family protein
AT2G35550.1	1.93517	2.02e-06	basic pentacysteine 7
AT3G49830.1	1.93516	1.76e-08	P-loop containing nucleoside triphosphate hydrolases superfamily protein
AT5G62210.1	1.92466	5.33e-07	Embryo-specific protein 3, (ATS3)
AT5G53190.1	1.92357	0.000116411	Nodulin MtN3 family protein
AT3G48740.1	1.92079	1.97e-06	Nodulin MtN3 family protein
AT3G27025.1	1.91945	0.000294083	unknown protein
AT3G10590.1	1.91696	0.000878136	Duplicated homeodomain-like superfamily protein
AT4G25820.1	1.91642	6.05e-08	xyloglucan endotransglucosylase/hydrolase 14
AT5G02030.1	1.90954	8.36e-06	POX (plant homeobox) family protein
ATMG00580.1	1.90681	2.49e-05	NADH dehydrogenase subunit 4
AT5G44400.1	1.90485	4.16e-13	FAD-binding Berberine family protein
AT3G48280.1	1.90125	1.97e-05	cytochrome P450, family 71, subfamily A, polypeptide 25
AT2G40000.1	1.9009	5.51e-07	ortholog of sugar beet HS1 PRO-1 2
AT5G63090.2	1.89959	0.000402925	Lateral organ boundaries (LOB) domain family protein
AT5G63090.3	1.89923	0.000369843	Lateral organ boundaries (LOB) domain family protein
AT5G11070.1	1.8908	1.35e-16	unknown protein
AT5G63090.4	1.8904	0.000253959	Lateral organ boundaries (LOB) domain family protein
AT4G25790.1	1.88922	0.000476004	CAP (Cysteine-rich secretory proteins, Antigen 5, and Pathogenesis-related 1 protein) superfamily protein
AT1G28190.1	1.88698	6.05e-15	unknown protein
AT5G06640.1	1.8813	9.11e-05	Proline-rich extensin-like family protein
AT4G20450.1	1.87409	0.000231696	Leucine-rich repeat protein kinase family protein
AT2G43620.1	1.87172	0.000354395	Chitinase family protein
AT4G21320.1	1.85932	5.06e-31	Aldolase-type TIM barrel family protein
AT4G32480.1	1.85675	1.26e-09	Protein of unknown function (DUF506)
AT1G58420.1	1.85636	0.000105333	Uncharacterised conserved protein UCP031279
AT3G24100.1	1.84546	3.09e-67	Uncharacterised protein family SERF
AT4G12400.2	1.83725	1.43e-41	stress-inducible protein, putative
AT5G38940.1	1.83508	6.21e-07	RmlC-like cupins superfamily protein
AT3G62680.1	1.83308	1.82e-05	proline-rich protein 3
AT5G35940.1	1.83281	6.73e-05	Mannose-binding lectin superfamily protein
AT5G24313.1	1.83088	0.000535994	unknown protein
AT3G05400.2	1.82457	3.12e-08	Major facilitator superfamily protein
AT1G61950.1	1.82345	0.000245829	calcium-dependent protein kinase 19
AT4G30320.1	1.82094	0.000125653	CAP (Cysteine-rich secretory proteins, Antigen 5, and Pathogenesis-related 1 protein) superfamily protein
AT1G70830.5	1.81906	2.43e-08	MLP-like protein 28
AT3G03190.1	1.81761	6.69e-22	glutathione S-transferase F11
AT3G56620.1	1.81714	8.87e-11	nodulin MtN21 /EamA-like transporter family protein
AT2G45930.1	1.81518	6.68e-07	unknown protein
AT5G60250.1	1.81459	0.000198991	zinc finger (C3HC4-type RING finger) family protein
AT1G79900.1	1.81417	9.74e-06	Mitochondrial substrate carrier family protein
AT3G22830.1	1.81404	1.6e-06	heat shock transcription factor A6B
AT1G15125.1	1.81155	0.000100948	S-adenosyl-L-methionine-dependent methyltransferases superfamily protein
AT3G29780.1	1.81152	6.62e-14	ralf-like 27
AT5G13220.2	1.80812	0.00028545	jasmonate-zim-domain protein 10
AT5G42580.1	1.8079	3.79e-07	cytochrome P450, family 705, subfamily A, polypeptide 12
AT5G37072.1	1.8068	0.000505213	pseudogene
AT3G20710.1	1.8062	1.11e-08	F-box family protein
AT3G13950.1	1.80181	4.04e-12	unknown protein
AT4G12400.1	1.79992	1.63e-42	stress-inducible protein, putative
AT2G18490.1	1.79644	0.000283691	C2H2-like zinc finger protein
AT5G42900.3	1.79598	5.66e-07	cold regulated gene 27
AT1G25460.1	1.78711	1.42e-07	NAD(P)-binding Rossmann-fold superfamily protein
AT2G46510.1	1.78551	3.61e-14	ABA-inducible BHLH-type transcription factor
AT3G41762.1	1.78513	0.000167207	unknown protein
AT5G42900.2	1.78442	2.59e-07	cold regulated gene 27
AT5G42900.1	1.78441	2.26e-07	cold regulated gene 27
AT2G35820.1	1.78285	0.000157312	ureidoglycolate hydrolases
AT1G66500.1	1.78195	9.2e-09	Pre-mRNA cleavage complex II
AT2G23010.1	1.77322	0.000159629	serine carboxypeptidase-like 9
AT3G57700.1	1.77092	3.73e-05	Protein kinase superfamily protein
AT3G51450.1	1.7677	6.22e-16	Calcium-dependent phosphotriesterase superfamily protein
AT4G36870.2	1.76678	1e-11	BEL1-like homeodomain 2
AT1G80440.1	1.76607	1.7e-06	Galactose oxidase/kelch repeat superfamily protein
AT2G40080.1	1.76322	3.22e-25	Protein of unknown function (DUF1313)
AT3G17600.1	1.76236	0.000647207	indole-3-acetic acid inducible 31
AT1G05575.1	1.76191	4.99e-09	unknown protein
AT3G23880.1	1.75714	4.66e-08	F-box and associated interaction domains-containing protein
AT2G01300.1	1.75628	0.000251053	unknown protein
AT3G50440.1	1.75593	0.000949532	methyl esterase 10
AT4G34060.2	1.75409	6.98e-09	demeter-like protein 3
AT3G19700.1	1.75353	7.91e-12	Leucine-rich repeat protein kinase family protein
AT1G34180.1	1.75224	2.48e-14	NAC domain containing protein 16
AT1G53130.1	1.751	2.18e-10	Stigma-specific Stig1 family protein
AT4G24660.1	1.75084	0.000766697	homeobox protein 22
AT4G36870.1	1.74582	6.7e-11	BEL1-like homeodomain 2
AT1G59850.1	1.74554	2.72e-15	ARM repeat superfamily protein
AT4G21326.1	1.74245	5.86e-19	subtilase 3.12
AT1G22370.2	1.74019	1.01e-07	UDP-glucosyl transferase 85A5
AT2G42610.2	1.74012	9.69e-11	Protein of unknown function (DUF640)
AT2G27690.1	1.7384	1.07e-06	cytochrome P450, family 94, subfamily C, polypeptide 1
AT5G04960.1	1.73476	2.08e-07	Plant invertase/pectin methylesterase inhibitor superfamily
AT5G48175.1	1.73352	9.36e-06	unknown protein
AT5G36790.1	1.73212	9.98e-06	Haloacid dehalogenase-like hydrolase (HAD) superfamily protein
AT5G36700.1	1.73212	9.98e-06	2-phosphoglycolate phosphatase 1
AT1G71280.1	1.73179	5.99e-05	DEA(D/H)-box RNA helicase family protein
AT1G34180.2	1.73159	6.84e-13	NAC domain containing protein 16
AT1G64065.1	1.73029	4.93e-05	Late embryogenesis abundant (LEA) hydroxyproline-rich glycoprotein family
AT5G36790.2	1.72939	2.31e-05	Haloacid dehalogenase-like hydrolase (HAD) superfamily protein
AT1G11210.1	1.72767	1.89e-28	Protein of unknown function (DUF761)
AT5G38100.1	1.72716	3.1e-10	S-adenosyl-L-methionine-dependent methyltransferases superfamily protein
AT5G43380.3	1.72709	5.01e-09	type one serine/threonine protein phosphatase 6
AT2G42610.1	1.72555	3.74e-11	Protein of unknown function (DUF640)
AT1G76870.1	1.72491	1.62e-09	unknown protein
AT1G22370.1	1.72478	2.93e-06	UDP-glucosyl transferase 85A5
AT3G04360.1	1.72212	1.07e-07	Calcium-dependent lipid-binding (CaLB domain) family protein
AT1G56300.1	1.72185	3.34e-43	Chaperone DnaJ-domain superfamily protein
AT5G67400.1	1.71925	8.71e-05	root hair specific 19
AT2G38790.1	1.71908	1.19e-08	unknown protein
AT5G25450.1	1.7174	1.44e-21	Cytochrome bd ubiquinol oxidase, 14kDa subunit
AT2G01008.1	1.71707	6.25e-06	unknown protein
AT2G35550.2	1.71682	1.28e-05	basic pentacysteine 7
AT5G39110.1	1.71542	0.000454815	RmlC-like cupins superfamily protein
AT5G52750.1	1.71341	0.000618206	Heavy metal transport/detoxification superfamily protein
AT2G35550.3	1.7102	5.22e-05	basic pentacysteine 7
AT1G14687.1	1.70814	6.39e-09	homeobox protein 32
AT1G27020.1	1.708	2.95e-06	unknown protein
AT5G05320.1	1.70743	5.1e-18	FAD/NAD(P)-binding oxidoreductase family protein
AT3G53690.1	1.70431	0.00011255	RING/U-box superfamily protein
AT1G45015.2	1.70404	2.23e-14	MD-2-related lipid recognition domain-containing protein
AT5G53980.1	1.70301	1.49e-09	homeobox protein 52
AT1G32920.1	1.70036	2.18e-16	unknown protein
AT3G56500.1	1.69416	0.000846577	serine-rich protein-related
AT1G53990.1	1.69273	7.59e-07	GDSL-motif lipase 3
AT5G14840.1	1.68987	1.16e-61	pseudogene
AT4G37800.1	1.68924	7.54e-30	xyloglucan endotransglucosylase/hydrolase 7
AT5G44490.1	1.68921	7.98e-06	FBD, F-box, Skp2-like and Leucine Rich Repeat domains containing protein
AT5G43380.2	1.68909	1.15e-08	type one serine/threonine protein phosphatase 6
AT1G56600.1	1.68271	0.000320816	galactinol synthase 2
AT2G27080.1	1.68173	1.16e-13	Late embryogenesis abundant (LEA) hydroxyproline-rich glycoprotein family
AT2G27080.2	1.68162	7.16e-14	Late embryogenesis abundant (LEA) hydroxyproline-rich glycoprotein family
AT3G18080.1	1.67857	4.71e-24	B-S glucosidase 44
AT5G40800.1	1.67817	0.000198991	unknown protein
AT5G03720.1	1.67545	1.32e-06	heat shock transcription factor A3
AT5G51810.1	1.67264	8.04e-09	gibberellin 20 oxidase 2
AT1G14960.1	1.6707	2.37e-12	Polyketide cyclase/dehydrase and lipid transport superfamily protein
AT5G38100.2	1.66868	4.62e-08	S-adenosyl-L-methionine-dependent methyltransferases superfamily protein
AT4G27460.1	1.66833	8.84e-06	Cystathionine beta-synthase (CBS) family protein
AT1G51340.1	1.66531	8.37e-14	MATE efflux family protein
AT5G19790.1	1.66342	0.000160941	related to AP2 11
AT4G36220.1	1.66336	5.47e-30	ferulic acid 5-hydroxylase 1
AT1G51340.2	1.66227	2.2e-14	MATE efflux family protein
AT5G36700.3	1.66207	3.04e-05	2-phosphoglycolate phosphatase 1
AT3G15830.1	1.66033	6.13e-05	phosphatidic acid phosphatase-related / PAP2-related
AT1G05450.2	1.65933	0.000234575	Bifunctional inhibitor/lipid-transfer protein/seed storage 2S albumin superfamily protein
AT1G59620.1	1.65763	4.38e-07	Disease resistance protein (CC-NBS-LRR class) family
AT3G08860.1	1.65683	1.76e-08	PYRIMIDINE 4
AT2G18350.1	1.65606	9.01e-11	homeobox protein 24
AT4G13280.1	1.65291	0.000436952	terpenoid synthase 12
AT4G13310.1	1.64999	0.000255531	cytochrome P450, family 71, subfamily A, polypeptide 20
AT5G28630.1	1.647	8.94e-06	glycine-rich protein
AT1G45015.1	1.64102	1.54e-13	MD-2-related lipid recognition domain-containing protein
AT3G59080.1	1.63856	7.05e-17	Eukaryotic aspartyl protease family protein
AT4G20050.2	1.63787	1.23e-11	Pectin lyase-like superfamily protein
AT5G36790.3	1.63747	4.24e-05	Haloacid dehalogenase-like hydrolase (HAD) superfamily protein
AT5G36700.4	1.63747	4.24e-05	2-phosphoglycolate phosphatase 1
AT5G36700.2	1.63746	4.23e-05	2-phosphoglycolate phosphatase 1
AT1G06923.1	1.63692	6.4e-05	unknown protein
AT4G34060.1	1.6356	1.96e-08	demeter-like protein 3
AT4G35480.1	1.63296	6.17e-16	RING-H2 finger A3B
AT5G59845.1	1.63237	7.04e-14	Gibberellin-regulated family protein
AT1G54160.1	1.6297	1.9e-05	nuclear factor Y, subunit A5
AT5G47740.1	1.62894	4.8e-30	Adenine nucleotide alpha hydrolases-like superfamily protein
AT3G19710.1	1.62864	3.83e-15	branched-chain aminotransferase4
AT5G63580.1	1.6273	2.63e-09	flavonol synthase 2
AT4G20050.1	1.6265	1.38e-11	Pectin lyase-like superfamily protein
AT5G10570.1	1.62587	1.76e-05	basic helix-loop-helix (bHLH) DNA-binding superfamily protein
AT1G67148.1	1.62552	1.69e-06	unknown protein
AT1G28570.1	1.62444	4.71e-17	SGNH hydrolase-type esterase superfamily protein
AT2G22880.1	1.62359	0.000901679	VQ motif-containing protein
AT5G23840.1	1.6215	2.45e-13	MD-2-related lipid recognition domain-containing protein
AT4G29610.1	1.61704	0.00049715	Cytidine/deoxycytidylate deaminase family protein
AT5G23840.2	1.61667	1.53e-13	MD-2-related lipid recognition domain-containing protein
AT5G38700.1	1.61404	5.09e-06	unknown protein
AT4G11280.1	1.61047	4.72e-05	1-aminocyclopropane-1-carboxylic acid (acc) synthase 6
AT2G35550.4	1.60892	6.19e-05	basic pentacysteine 7
AT4G18205.1	1.60834	3.97e-08	Nucleotide-sugar transporter family protein
AT3G59080.2	1.60832	1.21e-14	Eukaryotic aspartyl protease family protein
AT3G57450.1	1.60764	2.28e-26	unknown protein
AT3G05400.1	1.60721	2.12e-07	Major facilitator superfamily protein
AT5G07450.1	1.60532	0.000165039	cyclin p4;3
AT1G16410.1	1.60314	2.06e-12	cytochrome p450 79f1
AT4G33985.1	1.60314	1.95e-18	Protein of unknown function (DUF1685)
AT4G04570.2	1.60112	4.21e-05	cysteine-rich RLK (RECEPTOR-like protein kinase) 40
AT4G40090.1	1.60104	9.15e-06	arabinogalactan protein 3
AT1G05370.1	1.59999	4.53e-06	Sec14p-like phosphatidylinositol transfer family protein
AT5G47740.2	1.59876	1.88e-29	Adenine nucleotide alpha hydrolases-like superfamily protein
AT1G37150.1	1.59708	0.000626914	holocarboxylase synthetase 2
AT5G60142.1	1.59472	0.000580136	AP2/B3-like transcriptional factor family protein
AT3G47510.1	1.5925	9.25e-16	unknown protein
AT4G20000.1	1.59004	3.49e-07	VQ motif-containing protein
AT1G09950.1	1.5894	0.000606388	RESPONSE TO ABA AND SALT 1
AT1G53903.1	1.58875	1.15e-22	Protein of unknown function (DUF581)
AT2G35370.1	1.58802	1.42e-16	glycine decarboxylase complex H
AT1G27670.1	1.58711	6.12e-15	unknown protein
AT5G23010.1	1.58672	1.07e-25	methylthioalkylmalate synthase 1
AT1G53885.1	1.58458	1.71e-22	Protein of unknown function (DUF581)
AT1G37150.3	1.58382	0.000607375	holocarboxylase synthetase 2
AT5G06510.2	1.58341	5.21e-08	nuclear factor Y, subunit A10
AT5G14920.1	1.58322	2.99e-11	Gibberellin-regulated family protein
AT2G07733.1	1.5825	3.75e-05	pseudogene
AT5G66650.1	1.58214	5.84e-06	Protein of unknown function (DUF607)
AT5G22270.1	1.57829	5.66e-05	unknown protein
AT1G58340.1	1.57828	8.9e-18	MATE efflux family protein
AT4G15233.1	1.57814	5.55e-15	ABC-2 and Plant PDR ABC-type transporter family protein
AT4G34380.1	1.57571	0.000660829	Transducin/WD40 repeat-like superfamily protein
AT2G25150.1	1.57375	3.63e-05	HXXXD-type acyl-transferase family protein
AT3G55700.1	1.57054	9.06e-05	UDP-Glycosyltransferase superfamily protein
AT5G43380.1	1.56977	1.42e-08	type one serine/threonine protein phosphatase 6
AT5G14920.2	1.56954	2.37e-11	Gibberellin-regulated family protein
AT2G32190.2	1.56615	3.17e-07	unknown protein
AT2G30020.1	1.566	3.39e-12	Protein phosphatase 2C family protein
AT1G67370.1	1.56564	3.17e-13	DNA-binding HORMA family protein
AT1G03495.1	1.5637	4.66e-31	HXXXD-type acyl-transferase family protein
AT5G15210.1	1.56284	2.9e-14	homeobox protein 30
AT1G13430.1	1.56119	1.07e-11	sulfotransferase 4C
AT5G10210.1	1.56	4.43e-08	unknown protein
AT1G28570.2	1.55927	7.45e-14	SGNH hydrolase-type esterase superfamily protein
AT1G66180.1	1.55895	9.81e-19	Eukaryotic aspartyl protease family protein
AT1G19540.1	1.55382	1.65e-05	NmrA-like negative transcriptional regulator family protein
AT1G05240.1	1.55197	0.000845224	Peroxidase superfamily protein
AT5G23160.1	1.55195	0.000430393	unknown protein
AT5G08600.1	1.55097	1.32e-21	U3 ribonucleoprotein (Utp) family protein
AT3G50480.1	1.55076	0.000167207	homolog of RPW8 4
AT4G15233.2	1.54988	1.05e-12	ABC-2 and Plant PDR ABC-type transporter family protein
AT5G50160.1	1.54583	0.000144363	ferric reduction oxidase 8
AT3G61970.1	1.5428	6.93e-05	AP2/B3-like transcriptional factor family protein
AT2G18150.1	1.53681	0.000709428	Peroxidase superfamily protein
AT5G25450.2	1.53613	1.56e-13	Cytochrome bd ubiquinol oxidase, 14kDa subunit
AT2G26750.1	1.53565	2.67e-05	alpha/beta-Hydrolases superfamily protein
AT5G08600.2	1.53179	2.53e-19	U3 ribonucleoprotein (Utp) family protein
AT5G07580.1	1.53171	1.46e-12	Integrase-type DNA-binding superfamily protein
AT5G66170.3	1.53108	1.5e-20	sulfurtransferase 18
AT3G20380.1	1.52882	1.31e-20	TRAF-like family protein
AT3G62730.1	1.52628	1.54e-10	unknown protein
AT5G43330.1	1.52472	6.13e-41	Lactate/malate dehydrogenase family protein
AT5G47230.1	1.52356	2.26e-05	ethylene responsive element binding factor 5
AT1G77110.1	1.51952	2.4e-10	Auxin efflux carrier family protein
AT3G16720.1	1.51937	3.58e-06	TOXICOS EN LEVADURA 2
AT5G64905.1	1.51848	7.71e-08	elicitor peptide 3 precursor
AT4G34510.1	1.51829	7.03e-06	3-ketoacyl-CoA synthase 17
AT3G46780.1	1.51593	1.49e-07	plastid transcriptionally active 16
AT1G72900.1	1.51584	6.05e-08	Toll-Interleukin-Resistance (TIR) domain-containing protein
AT2G29330.1	1.51443	3.87e-18	tropinone reductase
AT3G25620.1	1.51146	1.06e-05	ABC-2 type transporter family protein
AT5G06510.3	1.50924	8.04e-09	nuclear factor Y, subunit A10
AT4G39700.1	1.50741	4.43e-06	Heavy metal transport/detoxification superfamily protein
AT5G66170.2	1.50594	3.5e-21	sulfurtransferase 18
AT5G59720.1	1.50452	4.93e-09	heat shock protein 18.2
AT5G66170.1	1.50439	2.17e-21	sulfurtransferase 18
AT4G37220.1	1.50318	0.000920638	Cold acclimation protein WCOR413 family
AT5G17700.1	1.50288	3.57e-09	MATE efflux family protein
AT3G53960.1	1.49991	7.8e-09	Major facilitator superfamily protein
AT2G01610.1	1.49927	4.04e-08	Plant invertase/pectin methylesterase inhibitor superfamily protein
AT5G06510.1	1.49759	2.33e-08	nuclear factor Y, subunit A10
AT1G16410.2	1.49701	1.26e-10	cytochrome p450 79f1
AT5G12110.1	1.49548	1.18e-30	Glutathione S-transferase, C-terminal-like;Translation elongation factor EF1B/ribosomal protein S6
AT1G10300.1	1.49475	1.64e-14	Nucleolar GTP-binding protein
AT1G16260.2	1.49312	5.65e-07	Wall-associated kinase family protein
AT3G54260.1	1.49307	2.96e-33	TRICHOME BIREFRINGENCE-LIKE 36
AT1G62980.1	1.49273	9.57e-05	expansin A18
AT2G33850.1	1.49223	1.24e-15	unknown protein
AT5G17860.1	1.49027	4.95e-05	calcium exchanger 7
AT1G16260.1	1.48848	6.53e-07	Wall-associated kinase family protein
AT3G01970.1	1.48824	9.7e-09	WRKY DNA-binding protein 45
AT1G62540.1	1.48528	1.04e-11	flavin-monooxygenase glucosinolate S-oxygenase 2
AT4G17500.1	1.48073	8.55e-21	ethylene responsive element binding factor 1
AT4G04570.1	1.47864	0.000103471	cysteine-rich RLK (RECEPTOR-like protein kinase) 40
AT3G45970.1	1.47298	2.87e-12	expansin-like A1
AT1G16400.1	1.46686	1.56e-28	cytochrome P450, family 79, subfamily F, polypeptide 2
AT1G65970.1	1.46592	4.62e-07	thioredoxin-dependent peroxidase 2
AT5G57625.1	1.46587	5.16e-05	CAP (Cysteine-rich secretory proteins, Antigen 5, and Pathogenesis-related 1 protein) superfamily protein
AT4G15280.1	1.46078	0.000163412	UDP-glucosyl transferase 71B5
AT4G08950.1	1.45936	8.54e-08	Phosphate-responsive 1 family protein
AT2G29010.1	1.45647	3.33e-12	pseudogene
AT4G30370.1	1.45627	3.02e-06	RING/U-box superfamily protein
AT5G53830.1	1.45273	2.19e-15	VQ motif-containing protein
AT2G33580.1	1.44996	1.37e-10	Protein kinase superfamily protein
AT2G46250.1	1.44633	3.11e-09	myosin heavy chain-related
AT4G03270.1	1.4457	3.97e-06	Cyclin D6;1
AT3G26220.1	1.44556	1.11e-06	cytochrome P450, family 71, subfamily B, polypeptide 3
AT3G06145.1	1.44468	9.8e-09	unknown protein
AT5G40020.1	1.43892	1.79e-21	Pathogenesis-related thaumatin superfamily protein
AT5G52790.1	1.43365	2.42e-05	CBS domain-containing protein with a domain of unknown function (DUF21)
AT1G22340.1	1.4308	0.000807657	UDP-glucosyl transferase 85A7
AT4G35420.1	1.42965	5.22e-20	dihydroflavonol 4-reductase-like1
AT2G01990.1	1.42898	2.23e-21	unknown protein
AT3G07650.3	1.4284	3.15e-20	CONSTANS-like 9
AT3G25620.2	1.4258	2.35e-05	ABC-2 type transporter family protein
AT5G42650.1	1.42406	8.38e-23	allene oxide synthase
AT1G02810.1	1.42322	2.96e-26	Plant invertase/pectin methylesterase inhibitor superfamily
AT3G52720.1	1.42191	0.000144427	alpha carbonic anhydrase 1
AT1G52342.1	1.42173	3.54e-09	unknown protein
ATMG00090.1	1.42148	1.7e-05	structural constituent of ribosome;protein binding
AT3G07650.2	1.42027	1.07e-19	CONSTANS-like 9
AT4G14280.1	1.41969	0.000669893	ARM repeat superfamily protein
AT5G18470.1	1.41736	2.11e-08	Curculin-like (mannose-binding) lectin family protein
AT3G07650.1	1.41612	1.91e-20	CONSTANS-like 9
AT5G25190.1	1.41551	5.41e-05	Integrase-type DNA-binding superfamily protein
AT3G46810.1	1.41316	9.17e-11	Cysteine/Histidine-rich C1 domain family protein
AT4G23510.1	1.41159	1.74e-20	Disease resistance protein (TIR-NBS-LRR class) family
AT4G02520.1	1.41123	8.79e-08	glutathione S-transferase PHI 2
AT2G32190.1	1.40938	1.87e-06	unknown protein
AT3G07650.4	1.40873	9.68e-20	CONSTANS-like 9
AT1G52410.1	1.40791	2.6e-05	TSK-associating protein 1
AT5G24780.2	1.40269	0.000313038	vegetative storage protein 1
AT1G34060.1	1.4019	4.78e-08	Pyridoxal phosphate (PLP)-dependent transferases superfamily protein
AT2G43100.1	1.40186	2.68e-23	isopropylmalate isomerase 2
AT4G15330.1	1.40128	8.82e-15	cytochrome P450, family 705, subfamily A, polypeptide 1
AT1G19770.1	1.40013	1.1e-09	purine permease 14
AT4G21120.1	1.40013	9.77e-18	amino acid transporter 1
AT5G37770.1	1.39936	1.28e-15	EF hand calcium-binding protein family
AT2G20180.2	1.39869	3.47e-11	phytochrome interacting factor 3-like 5
AT2G02930.1	1.39823	5.43e-08	glutathione S-transferase F3
AT2G31730.1	1.39702	8.34e-12	basic helix-loop-helix (bHLH) DNA-binding superfamily protein
AT4G03480.1	1.39617	0.000102009	Ankyrin repeat family protein
AT1G61390.1	1.39602	1.74e-05	S-locus lectin protein kinase family protein
AT5G24780.1	1.39559	0.000417961	vegetative storage protein 1
AT1G52410.2	1.39424	2.8e-05	TSK-associating protein 1
AT1G73500.1	1.39177	1.1e-07	MAP kinase kinase 9
AT2G20180.3	1.38599	5.44e-11	phytochrome interacting factor 3-like 5
AT1G15190.1	1.3845	3e-05	Fasciclin-like arabinogalactan family protein
AT1G47960.1	1.38107	1.52e-14	cell wall / vacuolar inhibitor of fructosidase 1
AT1G17460.1	1.3787	3.89e-13	TRF-like 3
AT5G05250.1	1.37559	0.000216777	unknown protein
AT3G02610.1	1.37361	3.06e-11	Plant stearoyl-acyl-carrier-protein desaturase family protein
AT3G07500.1	1.37297	3.7e-05	Far-red impaired responsive (FAR1) family protein
AT2G42760.1	1.37119	6.6e-20	unknown protein
AT1G12320.1	1.37033	3.63e-16	Protein of unknown function (DUF1442)
AT3G62410.1	1.36821	1.22e-05	CP12 domain-containing protein 2
AT2G29310.1	1.3665	0.000553877	NAD(P)-binding Rossmann-fold superfamily protein
AT4G23680.1	1.36611	3.11e-12	Polyketide cyclase/dehydrase and lipid transport superfamily protein
AT5G20420.1	1.36488	6.14e-07	chromatin remodeling 42
AT4G37970.1	1.36448	8.63e-11	cinnamyl alcohol dehydrogenase 6
AT5G64510.1	1.36279	5.29e-06	unknown protein
AT5G59490.1	1.36139	3e-14	Haloacid dehalogenase-like hydrolase (HAD) superfamily protein
AT4G13195.1	1.36068	4.83e-08	CLAVATA3/ESR-RELATED 44
AT1G17460.2	1.35766	1.41e-12	TRF-like 3
AT5G64550.1	1.35664	3.39e-12	loricrin-related
AT5G64552.1	1.35664	3.39e-12	conserved peptide upstream open reading frame 22
AT3G60330.1	1.35387	6.55e-07	H(+)-ATPase 7
AT5G51390.1	1.35302	3.4e-08	unknown protein
AT2G13580.1	1.353	8.81e-11	pseudogene
AT4G34530.1	1.3524	1.06e-05	cryptochrome-interacting basic-helix-loop-helix 1
AT2G31790.1	1.35222	1.77e-23	UDP-Glycosyltransferase superfamily protein
AT1G03940.1	1.352	3.85e-19	HXXXD-type acyl-transferase family protein
AT2G29310.2	1.34986	0.000772886	NAD(P)-binding Rossmann-fold superfamily protein
AT2G20180.1	1.34953	3.14e-11	phytochrome interacting factor 3-like 5
AT3G60330.2	1.34891	6.07e-07	H(+)-ATPase 7
AT5G59550.1	1.34828	2.99e-11	zinc finger (C3HC4-type RING finger) family protein
AT1G04620.1	1.34625	9.71e-10	coenzyme F420 hydrogenase family / dehydrogenase, beta subunit family
AT1G26560.1	1.3385	6.06e-06	beta glucosidase 40
AT1G48930.1	1.33734	0.000109974	glycosyl hydrolase 9C1
AT4G11190.1	1.33397	1.4e-09	Disease resistance-responsive (dirigent-like protein) family protein
AT1G30370.1	1.33214	7.71e-07	alpha/beta-Hydrolases superfamily protein
AT5G54400.1	1.33144	0.000368844	S-adenosyl-L-methionine-dependent methyltransferases superfamily protein
AT5G45730.1	1.33069	1.51e-06	Cysteine/Histidine-rich C1 domain family protein
AT3G49580.2	1.33038	6.7e-05	response to low sulfur 1
AT1G71380.1	1.32911	3.74e-08	cellulase 3
AT3G19030.1	1.32702	1.04e-17	unknown protein
AT5G46730.1	1.32682	2.11e-06	glycine-rich protein
AT3G51600.1	1.32561	1.79e-11	lipid transfer protein 5
AT1G60260.1	1.32497	2.81e-07	beta glucosidase 5
AT1G64680.1	1.32318	5.02e-05	unknown protein
AT5G44900.1	1.32184	9.11e-07	Toll-Interleukin-Resistance (TIR) domain family protein
AT1G30760.1	1.32111	3.63e-06	FAD-binding Berberine family protein
AT2G19990.1	1.31887	4.81e-05	pathogenesis-related protein-1-like
AT3G49580.1	1.31776	0.000159316	response to low sulfur 1
AT1G23970.2	1.31651	2.66e-23	Protein of unknown function (DUF626)
AT1G13260.1	1.31634	3.57e-10	related to ABI3/VP1 1
AT1G03400.1	1.31512	5.06e-06	2-oxoglutarate (2OG) and Fe(II)-dependent oxygenase superfamily protein
AT4G03210.2	1.31157	8.34e-21	xyloglucan endotransglucosylase/hydrolase 9
AT2G26370.1	1.30964	1.74e-06	MD-2-related lipid recognition domain-containing protein
AT1G23970.1	1.30959	8.83e-23	Protein of unknown function (DUF626)
AT4G20690.1	1.30709	1.73e-06	unknown protein
AT1G69325.1	1.30522	6.33e-06	Remorin family protein
AT1G32928.1	1.3052	2.55e-05	unknown protein
AT3G46640.3	1.30359	2.34e-26	Homeodomain-like superfamily protein
AT5G24140.1	1.30344	9.77e-05	squalene monooxygenase 2
AT2G29720.1	1.29913	7.11e-10	FAD/NAD(P)-binding oxidoreductase family protein
AT2G18480.1	1.29796	1.77e-06	Major facilitator superfamily protein
AT4G03210.1	1.2973	3.84e-22	xyloglucan endotransglucosylase/hydrolase 9
AT4G22610.1	1.29637	2.59e-07	Bifunctional inhibitor/lipid-transfer protein/seed storage 2S albumin superfamily protein
AT3G25790.1	1.29608	1.09e-10	myb-like transcription factor family protein
AT2G42850.1	1.29527	1.45e-06	cytochrome P450, family 718
AT5G46730.2	1.29216	5.26e-06	glycine-rich protein
AT1G60630.1	1.29191	0.000937242	Leucine-rich repeat protein kinase family protein
AT2G41640.2	1.29163	1.85e-12	Glycosyltransferase family 61 protein
AT3G02020.1	1.29131	3.02e-13	aspartate kinase 3
AT1G24100.1	1.2912	2.21e-37	UDP-glucosyl transferase 74B1
AT3G46640.2	1.29005	1.02e-25	Homeodomain-like superfamily protein
AT4G28750.1	1.289	5.8e-11	Photosystem I reaction centre subunit IV / PsaE protein
AT4G25810.1	1.28706	0.000294873	xyloglucan endotransglycosylase 6
AT2G34490.1	1.28371	4.07e-08	cytochrome P450, family 710, subfamily A, polypeptide 2
AT2G30550.2	1.28329	3.54e-16	alpha/beta-Hydrolases superfamily protein
AT3G29680.1	1.28246	2.85e-10	HXXXD-type acyl-transferase family protein
AT3G16650.1	1.277	1.9e-06	Transducin/WD40 repeat-like superfamily protein
AT1G15790.1	1.2768	4.19e-08	unknown protein
AT1G15790.2	1.27232	9.68e-09	unknown protein
AT3G47050.1	1.26964	9.8e-14	Glycosyl hydrolase family protein
AT5G08240.1	1.26939	2.19e-14	unknown protein
AT3G46640.1	1.26729	3.05e-24	Homeodomain-like superfamily protein
AT3G49780.1	1.26677	3.63e-09	phytosulfokine 4 precursor
AT2G37820.1	1.26492	1.32e-08	Cysteine/Histidine-rich C1 domain family protein
AT1G48700.1	1.2636	0.000439737	2-oxoglutarate (2OG) and Fe(II)-dependent oxygenase superfamily protein
AT1G60010.1	1.26038	1.13e-14	unknown protein
AT1G22990.1	1.25909	4.69e-14	Heavy metal transport/detoxification superfamily protein
AT5G10990.1	1.2572	3.89e-05	SAUR-like auxin-responsive protein family
AT4G31800.1	1.25454	3.41e-07	WRKY DNA-binding protein 18
AT4G19920.1	1.25393	1.2e-05	Toll-Interleukin-Resistance (TIR) domain family protein
AT5G25110.1	1.25342	1.48e-08	CBL-interacting protein kinase 25
AT2G30550.1	1.25247	2.43e-13	alpha/beta-Hydrolases superfamily protein
AT1G21810.1	1.25227	5.27e-05	Plant protein of unknown function (DUF869)
AT5G17170.1	1.25187	2.06e-05	rubredoxin family protein
AT1G30935.1	1.24807	2.31e-09	pseudogene
AT3G23170.1	1.24712	2.39e-09	unknown protein
AT1G61390.2	1.24662	4.63e-05	S-locus lectin protein kinase family protein
AT5G07240.1	1.2451	6.7e-09	IQ-domain 24
AT3G10870.1	1.24464	3.03e-06	methyl esterase 17
AT1G67910.1	1.24306	0.000212299	unknown protein
AT1G12950.1	1.24154	0.000662774	root hair specific 2
AT1G77380.1	1.24047	1.19e-12	amino acid permease 3
AT4G15270.1	1.2392	2.23e-07	glucosyltransferase-related
AT3G17790.1	1.23782	9.63e-07	purple acid phosphatase 17
AT3G55090.1	1.23741	5.18e-07	ABC-2 type transporter family protein
AT1G68238.1	1.23735	8.65e-08	unknown protein
AT4G20235.1	1.23723	3.07e-05	cytochrome P450, family 71, subfamily A, polypeptide 28
AT3G47050.2	1.23546	3.34e-12	Glycosyl hydrolase family protein
AT4G26270.1	1.23433	4.96e-13	phosphofructokinase 3
AT2G46610.1	1.23392	3.61e-12	RNA-binding (RRM/RBD/RNP motifs) family protein
AT5G51440.1	1.23322	7.35e-09	HSP20-like chaperones superfamily protein
AT1G05385.1	1.23186	4.67e-10	photosystem II 11 kDa protein-related
AT5G38000.1	1.23182	5.95e-06	Zinc-binding dehydrogenase family protein
AT4G13040.2	1.23169	1.34e-09	Integrase-type DNA-binding superfamily protein
AT2G26870.1	1.22801	0.000158548	non-specific phospholipase C2
AT2G34510.1	1.22737	3.18e-08	Protein of unknown function, DUF642
AT2G23620.1	1.22597	7.06e-06	methyl esterase 1
AT1G31790.1	1.22576	0.000332191	Tetratricopeptide repeat (TPR)-like superfamily protein
AT4G31800.2	1.22532	4.17e-07	WRKY DNA-binding protein 18
AT5G20860.1	1.22522	2.74e-06	Plant invertase/pectin methylesterase inhibitor superfamily
AT2G25240.1	1.22237	0.000305968	Serine protease inhibitor (SERPIN) family protein
AT3G56880.1	1.22192	6.16e-09	VQ motif-containing protein
AT2G21640.1	1.2207	0.000200877	unknown protein
AT2G16380.1	1.22014	1.62e-06	Sec14p-like phosphatidylinositol transfer family protein
AT4G01110.1	1.21877	1.61e-05	unknown protein
AT3G15990.1	1.21818	5.37e-14	sulfate transporter 3;4
AT3G56360.1	1.21814	1.87e-08	unknown protein
AT3G54820.1	1.21732	3.08e-11	plasma membrane intrinsic protein 2;5
AT2G41640.1	1.21712	3.01e-08	Glycosyltransferase family 61 protein
AT1G72940.1	1.21646	1.36e-06	Toll-Interleukin-Resistance (TIR) domain-containing protein
AT2G21130.1	1.21549	3.95e-09	Cyclophilin-like peptidyl-prolyl cis-trans isomerase family protein
AT5G43540.1	1.21529	1.74e-06	C2H2 and C2HC zinc fingers superfamily protein
AT2G22420.1	1.21379	4.29e-15	Peroxidase superfamily protein
AT2G22890.1	1.21016	4.82e-05	Kua-ubiquitin conjugating enzyme hybrid localisation domain
AT5G18150.1	1.20957	1.62e-13	Methyltransferase-related protein
AT1G51402.1	1.20703	2.99e-09	unknown protein
AT3G26450.1	1.20641	1.34e-10	Polyketide cyclase/dehydrase and lipid transport superfamily protein
AT5G38060.1	1.20625	0.000265632	unknown protein
AT3G14260.1	1.2058	0.000391686	Protein of unknown function (DUF567)
AT3G22240.1	1.20451	8.45e-05	unknown protein
AT1G60740.1	1.20404	5.8e-10	Thioredoxin superfamily protein
AT4G23810.1	1.20301	5.19e-05	WRKY family transcription factor
AT4G13040.3	1.20076	1.36e-10	Integrase-type DNA-binding superfamily protein
AT1G62500.1	1.20063	0.00018304	Bifunctional inhibitor/lipid-transfer protein/seed storage 2S albumin superfamily protein
AT5G56600.2	1.19843	5.11e-11	profilin 3
AT3G20420.1	1.19733	0.000220581	RNAse THREE-like protein 2
AT2G18300.2	1.19706	0.000651779	basic helix-loop-helix (bHLH) DNA-binding superfamily protein
AT5G57340.2	1.19588	2.74e-11	unknown protein
AT1G69870.1	1.19551	0.000210787	nitrate transporter 1.7
AT1G18100.1	1.1952	2.52e-07	PEBP (phosphatidylethanolamine-binding protein) family protein
AT5G28450.1	1.1951	1.71e-07	Chlorophyll A-B binding family protein
AT4G18210.1	1.19437	6.52e-05	purine permease 10
AT3G53980.2	1.19322	1.94e-10	Bifunctional inhibitor/lipid-transfer protein/seed storage 2S albumin superfamily protein
AT3G61470.1	1.19162	1.48e-06	photosystem I light harvesting complex gene 2
AT4G18510.1	1.18729	1.25e-05	CLAVATA3/ESR-related 2
AT1G21130.2	1.18698	3.03e-07	O-methyltransferase family protein
AT5G23830.2	1.18582	2.81e-13	MD-2-related lipid recognition domain-containing protein
AT1G51700.1	1.18558	3.41e-08	DOF zinc finger protein 1
AT5G23830.1	1.18533	5.99e-09	MD-2-related lipid recognition domain-containing protein
AT4G13040.1	1.18493	2.58e-10	Integrase-type DNA-binding superfamily protein
AT3G25780.1	1.18375	0.000183126	allene oxide cyclase 3
AT2G15880.1	1.18358	3.46e-05	Leucine-rich repeat (LRR) family protein
AT2G35140.3	1.18215	4.52e-09	DCD (Development and Cell Death) domain protein
AT4G32200.1	1.18155	4.18e-18	DNA-binding HORMA family protein
AT2G39210.1	1.18105	3.05e-11	Major facilitator superfamily protein
AT1G13245.1	1.18102	6.48e-12	ROTUNDIFOLIA like 17
AT3G53980.1	1.17977	1.01e-09	Bifunctional inhibitor/lipid-transfer protein/seed storage 2S albumin superfamily protein
AT2G48090.1	1.17958	2.42e-07	unknown protein
AT5G23020.1	1.17947	5.32e-21	2-isopropylmalate synthase 2
AT2G35140.2	1.17734	1.47e-08	DCD (Development and Cell Death) domain protein
AT3G45680.1	1.1737	0.000317704	Major facilitator superfamily protein
AT4G39235.1	1.17078	2.6e-05	unknown protein
AT3G58990.1	1.17074	1.08e-15	isopropylmalate isomerase 1
AT2G18690.2	1.17053	6.11e-05	unknown protein
AT5G39850.1	1.16994	9.23e-15	Ribosomal protein S4
AT5G64660.1	1.16928	2.39e-07	CYS, MET, PRO, and GLY protein 2
AT5G23060.1	1.16793	1.44e-10	calcium sensing receptor
AT1G70470.1	1.16595	3.73e-20	unknown protein
AT1G76590.1	1.16477	3.03e-06	PLATZ transcription factor family protein
AT2G35140.1	1.16253	2.22e-08	DCD (Development and Cell Death) domain protein
AT1G10340.1	1.16125	8.69e-05	Ankyrin repeat family protein
AT1G66400.1	1.16015	0.000766697	calmodulin like 23
AT2G28870.1	1.15703	6.7e-05	unknown protein
AT3G15518.1	1.15569	0.000104882	unknown protein
AT2G42220.1	1.15533	3.46e-07	Rhodanese/Cell cycle control phosphatase superfamily protein
AT5G17040.1	1.15349	0.000814661	UDP-Glycosyltransferase superfamily protein
AT1G54200.1	1.15187	2.69e-08	unknown protein
AT5G36220.1	1.15058	0.000124467	cytochrome p450 81d1
AT2G38465.1	1.15042	4.7e-07	unknown protein
AT5G17170.2	1.14938	0.000172572	rubredoxin family protein
AT1G10340.2	1.14855	0.000126245	Ankyrin repeat family protein
AT1G23850.1	1.14568	1.49e-11	unknown protein
AT1G76410.1	1.14504	2.33e-07	RING/U-box superfamily protein
AT3G10200.1	1.14498	7.1e-07	S-adenosyl-L-methionine-dependent methyltransferases superfamily protein
AT1G49880.1	1.14343	0.00010061	Erv1/Alr family protein
AT1G27620.1	1.14139	8.52e-12	HXXXD-type acyl-transferase family protein
AT4G39940.1	1.1412	3.68e-16	APS-kinase 2
AT5G65040.1	1.13941	1.84e-12	Protein of unknown function (DUF581)
AT5G16900.1	1.13756	3.48e-15	Leucine-rich repeat protein kinase family protein
AT1G77920.1	1.13634	1.16e-16	bZIP transcription factor family protein
AT2G41010.1	1.13492	1.8e-09	calmodulin (CAM)-binding protein of 25 kDa
AT4G36515.1	1.13376	1.46e-08	unknown protein
AT5G39790.1	1.13351	3.62e-07	5'-AMP-activated protein kinase-related
AT1G64590.1	1.13106	1.16e-10	NAD(P)-binding Rossmann-fold superfamily protein
AT5G51920.1	1.12906	5.74e-06	Pyridoxal phosphate (PLP)-dependent transferases superfamily protein
AT1G32640.1	1.12652	1.87e-09	Basic helix-loop-helix (bHLH) DNA-binding family protein
AT5G42590.1	1.1255	4.59e-06	cytochrome P450, family 71, subfamily A, polypeptide 16
AT3G04220.1	1.12466	0.000169823	Disease resistance protein (TIR-NBS-LRR class) family
AT3G10710.1	1.12349	0.000560624	root hair specific 12
AT5G56600.1	1.12219	1.1e-10	profilin 3
AT5G10695.1	1.12095	2.97e-08	unknown protein
AT2G35710.3	1.12001	1.21e-07	Nucleotide-diphospho-sugar transferases superfamily protein
AT4G19420.1	1.1195	1.48e-11	Pectinacetylesterase family protein
AT1G29465.1	1.11887	2.1e-05	unknown protein
AT3G06437.1	1.11818	5.35e-11	pseudogene
AT2G02630.1	1.11693	4.82e-09	Cysteine/Histidine-rich C1 domain family protein
AT4G27440.1	1.1161	6.37e-12	protochlorophyllide oxidoreductase B
AT3G25130.1	1.11595	5.46e-13	unknown protein
AT4G33810.1	1.11582	1.04e-07	Glycosyl hydrolase superfamily protein
AT4G27440.2	1.11534	3.25e-10	protochlorophyllide oxidoreductase B
AT2G24580.1	1.11522	2.51e-19	FAD-dependent oxidoreductase family protein
AT1G51400.1	1.11467	3.53e-09	Photosystem II 5 kD protein
AT1G15640.1	1.11368	1.18e-05	unknown protein
AT1G21130.1	1.11033	8.19e-07	O-methyltransferase family protein
AT2G46610.2	1.10997	3.82e-11	RNA-binding (RRM/RBD/RNP motifs) family protein
AT5G43170.1	1.10901	9.26e-09	zinc-finger protein 3
AT3G16640.1	1.10777	7.38e-26	translationally controlled tumor protein
AT3G45070.1	1.10755	9.63e-10	P-loop containing nucleoside triphosphate hydrolases superfamily protein
AT3G15530.1	1.10744	2.49e-14	S-adenosyl-L-methionine-dependent methyltransferases superfamily protein
AT5G09540.1	1.10517	1.44e-05	Chaperone DnaJ-domain superfamily protein
AT1G14890.1	1.1044	3.06e-10	Plant invertase/pectin methylesterase inhibitor superfamily protein
AT5G57790.2	1.10357	0.000617664	unknown protein
AT1G72450.1	1.10284	1.15e-11	jasmonate-zim-domain protein 6
AT4G17440.2	1.10279	2.92e-05	Protein of unknown function (DUF1639)
AT3G06433.1	1.09981	2.23e-16	pseudogene
AT4G15236.1	1.09939	0.000324422	ABC-2 and Plant PDR ABC-type transporter family protein
AT4G23060.1	1.09883	1.49e-09	IQ-domain 22
AT2G01340.1	1.0988	1.37e-05	unknown protein
AT5G37980.1	1.09847	8.6e-08	Zinc-binding dehydrogenase family protein
AT2G40085.1	1.09533	0.000612958	unknown protein
AT4G34580.1	1.09523	0.000161858	Sec14p-like phosphatidylinositol transfer family protein
AT3G15530.2	1.09496	7.91e-13	S-adenosyl-L-methionine-dependent methyltransferases superfamily protein
AT1G14790.1	1.09404	3.11e-15	RNA-dependent RNA polymerase 1
AT5G57340.1	1.0929	7.18e-10	unknown protein
AT1G19180.1	1.0921	3.16e-08	jasmonate-zim-domain protein 1
AT4G19420.2	1.09177	9.17e-11	Pectinacetylesterase family protein
AT4G33960.1	1.09105	1.81e-11	unknown protein
AT2G02610.1	1.0902	1.23e-14	Cysteine/Histidine-rich C1 domain family protein
AT5G03995.1	1.08953	4.79e-05	unknown protein
AT5G52070.1	1.08909	5.43e-13	Agenet domain-containing protein
AT3G20940.1	1.08773	2.96e-06	cytochrome P450, family 705, subfamily A, polypeptide 30
AT3G21530.1	1.08752	1.41e-08	DNAse I-like superfamily protein
AT1G80240.1	1.08664	4.42e-14	Protein of unknown function, DUF642
AT3G03470.1	1.08401	6.34e-10	cytochrome P450, family 87, subfamily A, polypeptide 9
AT1G29910.1	1.08396	1.5e-05	chlorophyll A/B binding protein 3
AT3G22060.1	1.08391	6.32e-05	Receptor-like protein kinase-related family protein
AT1G78780.3	1.08284	2.7e-11	pathogenesis-related family protein
AT1G10460.1	1.08254	7.42e-05	germin-like protein 7
AT4G01010.1	1.08208	6.25e-05	cyclic nucleotide-gated channel 13
AT3G57950.1	1.0819	2.8e-05	unknown protein
AT2G44000.1	1.08109	0.000670002	Late embryogenesis abundant (LEA) hydroxyproline-rich glycoprotein family
AT1G19180.2	1.08099	4.33e-08	jasmonate-zim-domain protein 1
AT1G66160.1	1.08045	1.25e-06	CYS, MET, PRO, and GLY protein 1
AT1G18590.1	1.0802	2.85e-13	sulfotransferase 17
AT1G68050.1	1.07947	1.83e-05	flavin-binding, kelch repeat, f box 1
AT5G66480.1	1.07901	1.87e-09	unknown protein
AT1G28480.1	1.07633	0.000435311	Thioredoxin superfamily protein
AT3G29240.2	1.07619	2.68e-11	Protein of unknown function (DUF179)
AT5G13720.1	1.07581	0.000241555	Uncharacterised protein family (UPF0114)
AT2G02640.1	1.0757	1.81e-08	Cysteine/Histidine-rich C1 domain family protein
AT3G21420.1	1.0757	5.03e-13	2-oxoglutarate (2OG) and Fe(II)-dependent oxygenase superfamily protein
AT2G44110.2	1.07539	5.2e-06	Seven transmembrane MLO family protein
AT4G21590.2	1.07444	2.81e-06	endonuclease 3
AT5G02180.1	1.07442	0.000674841	Transmembrane amino acid transporter family protein
AT1G28660.2	1.07405	1.52e-05	GDSL-like Lipase/Acylhydrolase superfamily protein
AT5G01210.1	1.07378	5.43e-21	HXXXD-type acyl-transferase family protein
AT2G18690.1	1.07181	0.000265004	unknown protein
AT5G13910.1	1.07004	1.85e-08	Integrase-type DNA-binding superfamily protein
AT1G10550.1	1.06912	0.000371699	xyloglucan:xyloglucosyl transferase 33
AT4G23670.1	1.06574	2.52e-07	Polyketide cyclase/dehydrase and lipid transport superfamily protein
AT5G45220.1	1.06513	4.97e-07	Disease resistance protein (TIR-NBS-LRR class) family
AT2G05300.1	1.06449	0.000974249	pseudogene
AT4G21590.1	1.05975	2.78e-06	endonuclease 3
AT5G65205.1	1.05964	2.72e-05	NAD(P)-binding Rossmann-fold superfamily protein
AT1G66160.2	1.05962	1.36e-06	CYS, MET, PRO, and GLY protein 1
AT3G44326.1	1.05683	1.27e-10	F-box family protein
AT2G44110.1	1.0556	3.23e-05	Seven transmembrane MLO family protein
AT3G26460.1	1.05441	0.000759405	Polyketide cyclase/dehydrase and lipid transport superfamily protein
AT4G11880.1	1.05426	3.69e-06	AGAMOUS-like 14
AT2G04110.1	1.05365	9.14e-09	pseudogene
AT1G69710.1	1.05274	0.000772741	Regulator of chromosome condensation (RCC1) family with FYVE zinc finger domain
AT1G69840.3	1.05221	9.76e-10	SPFH/Band 7/PHB domain-containing membrane-associated protein family
AT3G29240.1	1.05108	1.01e-10	Protein of unknown function (DUF179)
AT3G11745.1	1.05089	0.000839998	unknown protein
AT3G22880.1	1.05067	4.29e-09	DNA repair (Rad51) family protein
AT5G56910.1	1.04955	1.46e-09	Proteinase inhibitor I25, cystatin, conserved region
AT3G52900.1	1.04953	2.1e-18	Family of unknown function (DUF662)
AT4G11990.1	1.04583	0.000318541	Cell cycle regulated microtubule associated protein
AT1G71695.1	1.04529	1.65e-14	Peroxidase superfamily protein
AT4G17250.1	1.04496	9.18e-06	unknown protein
AT4G17250.2	1.04475	3.62e-05	unknown protein
AT4G04810.1	1.04457	1.84e-10	methionine sulfoxide reductase B4
AT5G02490.1	1.04452	2.76e-07	Heat shock protein 70 (Hsp 70) family protein
AT1G28660.1	1.0424	1.47e-05	GDSL-like Lipase/Acylhydrolase superfamily protein
AT5G65300.1	1.04204	0.000299188	unknown protein
AT4G28350.1	1.04138	0.000618895	Concanavalin A-like lectin protein kinase family protein
AT5G35735.1	1.04127	3.9e-08	Auxin-responsive family protein
AT3G45080.1	1.03961	0.000341623	P-loop containing nucleoside triphosphate hydrolases superfamily protein
AT3G54150.1	1.03948	0.000795691	S-adenosyl-L-methionine-dependent methyltransferases superfamily protein
AT5G64110.1	1.03743	0.000766968	Peroxidase superfamily protein
AT3G62720.2	1.03623	1.53e-10	xylosyltransferase 1
AT5G67620.1	1.03568	1.11e-08	unknown protein
AT2G16586.1	1.03404	4.02e-09	unknown protein
AT1G69840.2	1.03395	1.1e-09	SPFH/Band 7/PHB domain-containing membrane-associated protein family
AT5G42370.2	1.03244	3.96e-09	Calcineurin-like metallo-phosphoesterase superfamily protein
AT3G13650.1	1.03201	8.72e-11	Disease resistance-responsive (dirigent-like protein) family protein
AT1G07120.1	1.03042	0.000178007	unknown protein
AT3G49690.1	1.02873	1.71e-06	myb domain protein 84
AT1G35330.1	1.02743	7.18e-08	RING/U-box superfamily protein
AT4G36500.1	1.02727	8.22e-06	unknown protein
AT5G12890.1	1.02716	3.9e-10	UDP-Glycosyltransferase superfamily protein
AT3G62050.1	1.02653	0.000774086	Putative endonuclease or glycosyl hydrolase
AT1G69840.6	1.02467	1.44e-09	SPFH/Band 7/PHB domain-containing membrane-associated protein family
AT2G28650.1	1.02449	3.08e-05	exocyst subunit exo70 family protein H8
AT2G05630.2	1.0234	3.35e-16	Ubiquitin-like superfamily protein
AT5G49450.1	1.02266	0.000203305	basic leucine-zipper 1
AT5G49448.1	1.02266	0.000203305	conserved peptide upstream open reading frame 4
AT5G22860.1	1.02117	0.000662528	Serine carboxypeptidase S28 family protein
AT4G33550.1	1.02107	8.77e-05	Bifunctional inhibitor/lipid-transfer protein/seed storage 2S albumin superfamily protein
AT1G78780.1	1.0201	7.62e-09	pathogenesis-related family protein
AT1G69840.5	1.0197	1.58e-09	SPFH/Band 7/PHB domain-containing membrane-associated protein family
AT4G37380.1	1.01965	5.43e-07	Tetratricopeptide repeat (TPR)-like superfamily protein
AT1G17665.1	1.01883	1.33e-05	unknown protein
AT1G69840.7	1.01819	1.63e-09	SPFH/Band 7/PHB domain-containing membrane-associated protein family
AT4G25620.1	1.01771	2.03e-13	hydroxyproline-rich glycoprotein family protein
AT5G42370.1	1.01716	1.11e-08	Calcineurin-like metallo-phosphoesterase superfamily protein
AT3G43800.1	1.01694	1.57e-21	glutathione S-transferase tau 27
AT5G58500.1	1.01691	2.28e-06	Protein of unknown function (DUF640)
AT3G26770.1	1.01633	7.88e-16	NAD(P)-binding Rossmann-fold superfamily protein
AT1G69840.4	1.01459	1.72e-09	SPFH/Band 7/PHB domain-containing membrane-associated protein family
AT1G30530.1	1.01324	2.99e-05	UDP-glucosyl transferase 78D1
AT5G66440.1	1.0112	1.08e-18	unknown protein
AT1G75280.1	1.0109	2.79e-09	NmrA-like negative transcriptional regulator family protein
AT1G63150.1	1.01052	4.67e-08	Tetratricopeptide repeat (TPR)-like superfamily protein
AT5G39020.1	1.00959	0.000163498	Malectin/receptor-like protein kinase family protein
AT2G21660.2	1.00782	6.94e-08	cold, circadian rhythm, and rna binding 2
AT4G24380.2	1.00657	9.34e-09	unknown protein
AT4G03070.1	1.00565	0.000139902	2-oxoglutarate (2OG) and Fe(II)-dependent oxygenase superfamily protein
AT3G62720.1	1.00447	2.83e-10	xylosyltransferase 1
AT4G30670.1	1.00345	3.38e-07	Putative membrane lipoprotein
AT2G42720.1	1.00309	0.000104382	FBD, F-box, Skp2-like and Leucine Rich Repeat domains containing protein
AT1G63295.1	1.00256	1.25e-07	Remorin family protein
AT2G46420.1	-1.00015	8.39e-11	Plant protein 1589 of unknown function
AT2G16430.2	-1.00329	5.75e-13	purple acid phosphatase 10
AT4G27410.2	-1.00342	1.32e-06	NAC (No Apical Meristem) domain transcriptional regulator superfamily protein
AT5G41590.1	-1.00411	3.94e-05	Protein of unknown function (DUF567)
AT1G53680.1	-1.00459	1.04e-07	glutathione S-transferase TAU 28
AT1G09560.1	-1.00571	2.08e-07	germin-like protein 5
AT2G16430.1	-1.00618	6.61e-13	purple acid phosphatase 10
AT3G09440.1	-1.01585	8.67e-08	Heat shock protein 70 (Hsp 70) family protein
AT4G25960.1	-1.01609	7.55e-07	P-glycoprotein 2
AT2G23410.1	-1.01626	4.8e-06	cis-prenyltransferase
AT3G09440.2	-1.01877	7.83e-08	Heat shock protein 70 (Hsp 70) family protein
AT1G06040.1	-1.01959	3.13e-25	B-box zinc finger family protein
AT5G64940.1	-1.01992	7.55e-24	ABC2 homolog 13
AT1G06040.2	-1.02093	8.77e-25	B-box zinc finger family protein
AT1G53625.1	-1.02296	7.08e-05	unknown protein
AT1G75900.1	-1.02541	7.93e-05	GDSL-like Lipase/Acylhydrolase superfamily protein
AT2G46420.2	-1.02546	1.11e-10	Plant protein 1589 of unknown function
AT5G64940.2	-1.0274	8.16e-24	ABC2 homolog 13
AT5G48410.1	-1.03192	1.99e-06	glutamate receptor 1.3
AT4G34131.1	-1.03413	8.16e-21	UDP-glucosyl transferase 73B3
AT3G09800.1	-1.04207	1.3e-06	SNARE-like superfamily protein
AT5G02270.1	-1.05169	3.56e-14	non-intrinsic ABC protein 9
AT4G25400.1	-1.05364	1.45e-09	basic helix-loop-helix (bHLH) DNA-binding superfamily protein
AT2G15490.2	-1.0539	8e-07	UDP-glycosyltransferase 73B4
AT5G02270.2	-1.05511	6.52e-15	non-intrinsic ABC protein 9
AT5G65870.1	-1.05899	2.39e-05	phytosulfokine 5 precursor
AT1G13520.1	-1.0602	8.65e-08	Protein of unknown function (DUF1262)
AT1G19715.1	-1.06107	1.14e-31	Mannose-binding lectin superfamily protein
AT3G44550.1	-1.06107	3.83e-09	fatty acid reductase 5
AT1G19715.2	-1.06525	1.01e-30	Mannose-binding lectin superfamily protein
AT3G13640.1	-1.06558	0.000957573	RNAse l inhibitor protein 1
AT5G25610.1	-1.0686	7.28e-05	BURP domain-containing protein
AT3G54990.2	-1.07329	7e-08	Integrase-type DNA-binding superfamily protein
AT1G20450.1	-1.07511	9.33e-11	Dehydrin family protein
AT1G30700.1	-1.07574	5.4e-22	FAD-binding Berberine family protein
AT1G20450.2	-1.07684	7.45e-11	Dehydrin family protein
AT1G58270.1	-1.08075	4.09e-13	TRAF-like family protein
AT3G59340.1	-1.08444	3.3e-12	Eukaryotic protein of unknown function (DUF914)
AT4G34830.1	-1.08628	1.35e-09	Pentatricopeptide repeat (PPR) superfamily protein
AT4G30650.1	-1.08688	0.000137645	Low temperature and salt responsive protein family
AT1G77080.3	-1.08771	3.62e-05	K-box region and MADS-box transcription factor family protein
AT1G02520.1	-1.08999	3.51e-19	P-glycoprotein 11
AT1G19715.3	-1.09147	2.42e-30	Mannose-binding lectin superfamily protein
AT1G68690.1	-1.09902	2.23e-25	Protein kinase superfamily protein
AT1G30730.1	-1.10183	7.71e-11	FAD-binding Berberine family protein
AT4G23550.1	-1.102	7.53e-12	WRKY family transcription factor
AT5G65140.1	-1.10298	0.000122902	Haloacid dehalogenase-like hydrolase (HAD) superfamily protein
AT2G20340.1	-1.1038	6.55e-10	Pyridoxal phosphate (PLP)-dependent transferases superfamily protein
AT5G62130.2	-1.10699	2.92e-14	Per1-like family protein
AT4G27480.2	-1.10785	1.05e-06	Core-2/I-branching beta-1,6-N-acetylglucosaminyltransferase family protein
AT5G62130.1	-1.1114	9.51e-15	Per1-like family protein
AT5G44110.2	-1.11165	2.88e-11	P-loop containing nucleoside triphosphate hydrolases superfamily protein
AT5G49770.1	-1.11224	6.71e-06	Leucine-rich repeat protein kinase family protein
AT1G77080.2	-1.11507	6.81e-22	K-box region and MADS-box transcription factor family protein
AT5G44110.3	-1.1157	2.12e-11	P-loop containing nucleoside triphosphate hydrolases superfamily protein
AT5G02170.1	-1.11729	2.18e-05	Transmembrane amino acid transporter family protein
AT2G15490.1	-1.11781	4.61e-06	UDP-glycosyltransferase 73B4
AT5G44110.1	-1.11929	1.58e-11	P-loop containing nucleoside triphosphate hydrolases superfamily protein
AT2G15970.1	-1.11952	1.79e-13	cold regulated 413 plasma membrane 1
AT4G34881.1	-1.12165	9.69e-14	unknown protein
AT2G33710.1	-1.12173	9.46e-10	Integrase-type DNA-binding superfamily protein
AT5G02170.2	-1.12203	1.57e-05	Transmembrane amino acid transporter family protein
AT4G27480.1	-1.12459	1.16e-06	Core-2/I-branching beta-1,6-N-acetylglucosaminyltransferase family protein
AT1G51420.1	-1.12722	1.42e-18	sucrose-phosphatase 1
AT2G15490.3	-1.12819	1.65e-06	UDP-glycosyltransferase 73B4
AT2G15970.2	-1.13257	2.02e-12	cold regulated 413 plasma membrane 1
AT5G48400.2	-1.13754	0.000321426	Glutamate receptor family protein
AT2G33710.2	-1.14533	1.54e-08	Integrase-type DNA-binding superfamily protein
AT3G59140.1	-1.14572	5.15e-07	multidrug resistance-associated protein 14
AT2G46495.1	-1.14702	4.03e-06	RING/U-box superfamily protein
AT4G25250.1	-1.14869	5.65e-15	Plant invertase/pectin methylesterase inhibitor superfamily protein
AT3G54990.1	-1.14956	1.01e-13	Integrase-type DNA-binding superfamily protein
AT1G64500.1	-1.15299	8.69e-09	Glutaredoxin family protein
AT2G28160.1	-1.15345	1.44e-16	FER-like regulator of iron uptake
AT3G42180.1	-1.15453	1.12e-08	Exostosin family protein
AT5G49480.1	-1.15635	1.73e-12	Ca2+-binding protein 1
AT4G15430.2	-1.15704	1.27e-12	ERD (early-responsive to dehydration stress) family protein
AT5G03050.1	-1.16026	1.52e-05	unknown protein
AT4G19970.1	-1.16459	0.000343958	unknown protein
AT2G32530.1	-1.16548	1.89e-05	cellulose synthase-like B3
AT3G15354.1	-1.16992	1.29e-20	SPA1-related 3
AT5G49780.1	-1.17034	9.29e-07	Leucine-rich repeat protein kinase family protein
AT2G28100.1	-1.17362	2.19e-24	alpha-L-fucosidase 1
AT1G52560.2	-1.17383	0.000772182	HSP20-like chaperones superfamily protein
AT5G67030.2	-1.17962	2.73e-28	zeaxanthin epoxidase (ZEP) (ABA1)
AT5G67030.1	-1.17985	8.52e-29	zeaxanthin epoxidase (ZEP) (ABA1)
AT4G12310.1	-1.18152	2.82e-06	cytochrome P450, family 706, subfamily A, polypeptide 5
AT4G15430.1	-1.18307	2.32e-12	ERD (early-responsive to dehydration stress) family protein
AT1G21360.1	-1.18757	1.13e-09	glycolipid transfer protein 2
AT3G08040.2	-1.19115	9.29e-09	MATE efflux family protein
AT3G08040.1	-1.1934	7.1e-09	MATE efflux family protein
AT3G54420.1	-1.20059	1.81e-18	homolog of carrot EP3-3 chitinase
AT1G78850.1	-1.2058	1.44e-25	D-mannose binding lectin protein with Apple-like carbohydrate-binding domain
AT1G77080.5	-1.20944	2.46e-26	K-box region and MADS-box transcription factor family protein
AT3G28740.1	-1.2165	1.85e-12	Cytochrome P450 superfamily protein
AT3G47500.1	-1.21964	2.48e-26	cycling DOF factor 3
AT2G29450.1	-1.22047	4.77e-14	glutathione S-transferase tau 5
AT3G27870.1	-1.22106	1.94e-16	ATPase E1-E2 type family protein / haloacid dehalogenase-like hydrolase family protein
AT2G42900.1	-1.22385	0.000751815	Plant basic secretory protein (BSP) family protein
AT2G45560.2	-1.22386	1.28e-08	cytochrome P450, family 76, subfamily C, polypeptide 1
AT3G55330.1	-1.22624	0.000223346	PsbP-like protein 1
AT5G39090.1	-1.23117	9.8e-07	HXXXD-type acyl-transferase family protein
AT3G08770.1	-1.23475	6.84e-07	lipid transfer protein 6
AT2G43880.1	-1.23539	1.73e-09	Pectin lyase-like superfamily protein
AT4G02280.1	-1.23796	1.03e-08	sucrose synthase 3
AT1G27140.1	-1.24352	2.08e-10	glutathione S-transferase tau 14
AT1G78230.1	-1.24628	8.54e-07	Outer arm dynein light chain 1 protein
AT1G77080.4	-1.25406	7.22e-31	K-box region and MADS-box transcription factor family protein
AT3G13600.1	-1.26123	0.000201782	calmodulin-binding family protein
AT5G64700.1	-1.26383	1.2e-10	nodulin MtN21 /EamA-like transporter family protein
AT1G14200.1	-1.26803	3.88e-07	RING/U-box superfamily protein
AT3G46400.1	-1.26953	0.000372295	Leucine-rich repeat protein kinase family protein
AT5G63140.1	-1.2723	8.46e-06	purple acid phosphatase 29
AT1G14220.1	-1.27508	7.71e-10	Ribonuclease T2 family protein
AT3G14540.1	-1.27606	2.52e-10	Terpenoid cyclases/Protein prenyltransferases superfamily protein
AT4G15300.1	-1.27653	1.21e-05	cytochrome P450, family 702, subfamily A, polypeptide 2
AT2G38870.1	-1.28229	3.2e-11	Serine protease inhibitor, potato inhibitor I-type family protein
AT5G64170.2	-1.2841	5.12e-28	dentin sialophosphoprotein-related
AT1G65570.1	-1.29423	1.84e-08	Pectin lyase-like superfamily protein
AT2G25680.1	-1.29888	5.69e-12	molybdate transporter 1
AT3G42180.3	-1.29957	4.65e-05	Exostosin family protein
AT4G27310.1	-1.30077	5.92e-07	B-box type zinc finger family protein
AT3G02850.1	-1.3114	3.38e-10	STELAR K+ outward rectifier
AT3G08770.2	-1.31323	3.55e-07	lipid transfer protein 6
AT1G48260.1	-1.31443	7.43e-05	CBL-interacting protein kinase 17
AT1G30990.1	-1.31629	0.000424876	Polyketide cyclase/dehydrase and lipid transport superfamily protein
AT5G64170.1	-1.31712	7.69e-29	dentin sialophosphoprotein-related
AT1G05230.1	-1.31909	1.36e-08	homeodomain GLABROUS 2
AT1G52560.1	-1.31991	0.000407649	HSP20-like chaperones superfamily protein
AT4G40010.1	-1.32483	2.76e-19	SNF1-related protein kinase 2.7
AT1G05230.3	-1.3302	2.55e-08	homeodomain GLABROUS 2
AT2G45560.1	-1.33505	2.31e-15	cytochrome P450, family 76, subfamily C, polypeptide 1
AT1G05230.2	-1.33958	8.68e-09	homeodomain GLABROUS 2
AT3G28210.1	-1.34201	2.65e-09	zinc finger (AN1-like) family protein
AT1G05230.4	-1.34627	6.91e-09	homeodomain GLABROUS 2
AT5G57660.1	-1.34729	1.03e-27	CONSTANS-like 5
AT1G57590.1	-1.34798	8.79e-06	Pectinacetylesterase family protein
AT5G57180.1	-1.35433	2.32e-10	chloroplast import apparatus 2
AT2G24400.1	-1.35773	0.000168608	SAUR-like auxin-responsive protein family
AT5G57180.3	-1.35786	6.36e-09	chloroplast import apparatus 2
AT5G41050.1	-1.36122	7.31e-06	Pollen Ole e 1 allergen and extensin family protein
AT5G17460.1	-1.36146	2.14e-14	unknown protein
AT1G05690.1	-1.36366	6.3e-06	BTB and TAZ domain protein 3
AT3G21560.1	-1.36488	2.02e-11	UDP-Glycosyltransferase superfamily protein
AT1G78860.1	-1.373	1.11e-16	D-mannose binding lectin protein with Apple-like carbohydrate-binding domain
AT3G47780.1	-1.3734	3.73e-25	ABC2 homolog 6
AT3G48940.1	-1.37373	0.000251883	Remorin family protein
AT1G11600.1	-1.37654	8.96e-07	cytochrome P450, family 77, subfamily B, polypeptide 1
AT5G57180.2	-1.38095	2.4e-10	chloroplast import apparatus 2
AT4G13510.1	-1.39137	6.44e-40	ammonium transporter 1;1
AT2G31940.1	-1.39279	0.000504807	unknown protein
AT1G64380.1	-1.39967	2.15e-13	Integrase-type DNA-binding superfamily protein
AT4G23700.1	-1.40369	8.53e-15	cation/H+ exchanger 17
AT1G25141.1	-1.40845	0.000152715	F-box associated ubiquitination effector family protein
AT3G14200.1	-1.41634	1.82e-20	Chaperone DnaJ-domain superfamily protein
AT2G38600.1	-1.41762	3.51e-05	HAD superfamily, subfamily IIIB acid phosphatase
AT2G19900.1	-1.42129	0.000237104	NADP-malic enzyme 1
AT1G68530.1	-1.42163	9.13e-10	3-ketoacyl-CoA synthase 6
AT4G08555.1	-1.44263	1.07e-06	unknown protein
AT1G50060.1	-1.44633	1.91e-19	CAP (Cysteine-rich secretory proteins, Antigen 5, and Pathogenesis-related 1 protein) superfamily protein
AT4G34135.1	-1.45372	2.25e-19	UDP-glucosyltransferase 73B2
AT1G68530.2	-1.46889	6.64e-11	3-ketoacyl-CoA synthase 6
AT5G51520.1	-1.47222	3.04e-09	Plant invertase/pectin methylesterase inhibitor superfamily protein
AT2G39510.1	-1.47712	8.34e-09	nodulin MtN21 /EamA-like transporter family protein
ATCG00190.1	-1.484	1.78e-06	RNA polymerase subunit beta
AT5G16980.2	-1.48504	6.59e-07	Zinc-binding dehydrogenase family protein
AT1G26250.1	-1.4868	1.77e-07	Proline-rich extensin-like family protein
AT1G44318.1	-1.49117	0.000980212	Aldolase superfamily protein
AT1G24792.1	-1.49143	4.02e-06	pseudogene
AT3G46270.1	-1.49346	4.44e-06	receptor protein kinase-related
AT1G24879.1	-1.49411	9.17e-05	pseudogene
AT1G25053.1	-1.49717	2.33e-05	pseudogene
AT3G63380.1	-1.50323	2.61e-09	ATPase E1-E2 type family protein / haloacid dehalogenase-like hydrolase family protein
AT5G16970.1	-1.50376	7.16e-17	alkenal reductase
AT1G25209.1	-1.50439	2.4e-06	pseudogene
AT1G51880.1	-1.50573	3.84e-09	root hair specific 6
AT5G39050.1	-1.50957	6.01e-08	HXXXD-type acyl-transferase family protein
AT1G57770.1	-1.51075	0.000718975	FAD/NAD(P)-binding oxidoreductase family protein
AT4G01390.1	-1.51645	1.21e-06	TRAF-like family protein
AT4G34135.2	-1.5195	2.06e-28	UDP-glucosyltransferase 73B2
AT1G22630.1	-1.52143	0.000214555	unknown protein
AT5G14650.1	-1.53231	2.58e-05	Pectin lyase-like superfamily protein
AT5G06980.3	-1.53264	4.15e-11	unknown protein
AT2G13360.1	-1.53345	1.27e-10	alanine:glyoxylate aminotransferase
AT5G06980.2	-1.53387	1.28e-11	unknown protein
AT1G66950.1	-1.54099	8.02e-14	pleiotropic drug resistance 11
AT3G14810.2	-1.54161	3.47e-25	mechanosensitive channel of small conductance-like 5
AT4G28940.1	-1.54337	2.9e-23	Phosphorylase superfamily protein
AT2G13360.2	-1.54552	1.18e-10	alanine:glyoxylate aminotransferase
AT1G48070.1	-1.5475	0.000761716	Thioredoxin superfamily protein
AT3G14810.1	-1.55458	7.38e-27	mechanosensitive channel of small conductance-like 5
AT5G16980.1	-1.55597	1.65e-07	Zinc-binding dehydrogenase family protein
AT2G31380.1	-1.5575	4.32e-08	salt tolerance homologue
AT3G56290.1	-1.56013	5.6e-13	unknown protein
AT1G72490.1	-1.5643	1.14e-08	unknown protein
AT1G62580.1	-1.56774	4.31e-07	Flavin-binding monooxygenase family protein
AT5G54470.1	-1.57144	2e-06	B-box type zinc finger family protein
AT5G06980.1	-1.57211	2.46e-12	unknown protein
AT2G05540.1	-1.57388	3.52e-05	Glycine-rich protein family
AT3G46250.1	-1.57682	7.08e-05	pseudogene
AT5G06980.4	-1.58699	1.07e-11	unknown protein
AT1G53660.1	-1.58748	3.03e-05	nodulin MtN21 /EamA-like transporter family protein
AT4G00910.1	-1.59109	1.07e-16	Aluminium activated malate transporter family protein
AT5G24120.1	-1.59512	1.27e-28	sigma factor E
AT3G12320.1	-1.60061	3.47e-07	unknown protein
AT5G10140.4	-1.60123	0.000880548	K-box region and MADS-box transcription factor family protein
AT3G54500.3	-1.60252	8.26e-25	unknown protein
AT4G33070.1	-1.60445	1.03e-09	Thiamine pyrophosphate dependent pyruvate decarboxylase family protein
AT3G54500.2	-1.60789	1.16e-25	unknown protein
AT1G66460.1	-1.62094	0.000614062	Protein kinase superfamily protein
AT1G13510.1	-1.62515	2.04e-12	Protein of unknown function (DUF1262)
AT3G50970.1	-1.62574	2.91e-33	dehydrin family protein
AT3G54500.1	-1.62748	1.39e-25	unknown protein
AT5G44585.1	-1.63846	9.32e-06	unknown protein
AT5G44130.1	-1.64507	1.46e-13	FASCICLIN-like arabinogalactan protein 13 precursor
AT3G54500.4	-1.64886	1.17e-24	unknown protein
AT1G17180.1	-1.65609	4.23e-16	glutathione S-transferase TAU 25
AT2G46830.2	-1.66528	3.27e-18	circadian clock associated 1
AT5G01600.1	-1.67748	5.13e-08	ferretin 1
AT2G46830.1	-1.68564	3.06e-20	circadian clock associated 1
AT5G10140.3	-1.68765	0.00060543	K-box region and MADS-box transcription factor family protein
AT4G24415.1	-1.68909	1.13e-05	MIR824a; miRNA
AT1G17170.1	-1.69079	3.99e-38	glutathione S-transferase TAU 24
AT5G65380.1	-1.69718	3.24e-69	MATE efflux family protein
AT4G24415.2	-1.69719	3.63e-05	MIR824a; miRNA
AT2G31250.1	-1.70117	6.66e-05	Glutamyl-tRNA reductase family protein
AT5G10140.2	-1.70622	0.00054244	K-box region and MADS-box transcription factor family protein
AT4G04840.1	-1.70651	2.98e-10	methionine sulfoxide reductase B6
AT3G23730.1	-1.70653	1.81e-21	xyloglucan endotransglucosylase/hydrolase 16
AT5G10140.1	-1.71042	0.000679083	K-box region and MADS-box transcription factor family protein
AT1G78340.1	-1.71518	3.4e-39	glutathione S-transferase TAU 22
AT5G25250.1	-1.72595	1.9e-12	SPFH/Band 7/PHB domain-containing membrane-associated protein family
AT2G16890.2	-1.73919	4.42e-09	UDP-Glycosyltransferase superfamily protein
AT1G14550.1	-1.74732	3.15e-06	Peroxidase superfamily protein
AT5G19040.1	-1.75029	2.54e-32	isopentenyltransferase 5
AT2G43500.2	-1.76023	5.26e-11	Plant regulator RWP-RK family protein
AT2G43500.1	-1.76292	7.24e-11	Plant regulator RWP-RK family protein
AT2G04040.1	-1.76295	0.000262011	MATE efflux family protein
AT5G43450.1	-1.76458	3.28e-12	2-oxoglutarate (2OG) and Fe(II)-dependent oxygenase superfamily protein
AT2G32940.1	-1.76832	1.9e-10	Argonaute family protein
AT4G22640.1	-1.77277	3.09e-05	Bifunctional inhibitor/lipid-transfer protein/seed storage 2S albumin superfamily protein
AT3G48850.1	-1.77396	0.000195431	phosphate transporter 3;2
AT4G15490.1	-1.77615	4.29e-10	UDP-Glycosyltransferase superfamily protein
AT2G02950.1	-1.78465	4.61e-17	phytochrome kinase substrate 1
AT1G64910.1	-1.78638	2.03e-07	UDP-Glycosyltransferase superfamily protein
AT3G25190.1	-1.80257	2.7e-19	Vacuolar iron transporter (VIT) family protein
AT4G40020.1	-1.80452	2.67e-10	Myosin heavy chain-related protein
AT5G43580.1	-1.80896	2.76e-45	Serine protease inhibitor, potato inhibitor I-type family protein
AT1G55120.3	-1.82893	3.04e-23	beta-fructofuranosidase 5
AT2G26820.1	-1.8305	5.12e-28	phloem protein 2-A3
AT5G20790.1	-1.83055	6.01e-07	unknown protein
AT3G09400.1	-1.83732	4.93e-13	pol-like 3
AT3G14770.1	-1.85212	2.33e-38	Nodulin MtN3 family protein
AT1G55120.2	-1.85253	3.3e-26	beta-fructofuranosidase 5
AT5G61490.1	-1.85656	8.11e-09	Uncharacterised conserved protein (UCP012943)
AT1G55120.1	-1.85877	1.27e-26	beta-fructofuranosidase 5
AT1G21210.1	-1.86172	0.000193668	wall associated kinase 4
AT5G03495.1	-1.86521	0.00071193	RNA-binding (RRM/RBD/RNP motifs) family protein
AT1G61810.1	-1.86899	7.72e-20	beta-glucosidase 45
AT1G58320.1	-1.87549	6.55e-10	PLAC8 family protein
AT3G01060.2	-1.87578	1.08e-10	unknown protein
AT5G10100.1	-1.8802	7.16e-17	Haloacid dehalogenase-like hydrolase (HAD) superfamily protein
AT3G09400.2	-1.88254	5.11e-14	pol-like 3
AT3G20340.1	-1.88957	1.12e-06	unknown protein
AT5G50200.3	-1.89125	1.92e-43	nitrate transmembrane transporters
AT5G50200.2	-1.8985	5.78e-44	nitrate transmembrane transporters
AT3G01060.1	-1.9003	1.15e-11	unknown protein
AT5G50200.1	-1.9071	2.25e-45	nitrate transmembrane transporters
AT2G13810.1	-1.91175	1.69e-06	AGD2-like defense response protein 1
AT1G48800.1	-1.92907	0.000313895	Terpenoid cyclases/Protein prenyltransferases superfamily protein
AT2G19500.1	-1.9306	6.51e-05	cytokinin oxidase 2
AT5G13210.1	-1.93305	9.81e-13	Uncharacterised conserved protein UCP015417, vWA
AT5G48430.1	-1.94165	3.77e-28	Eukaryotic aspartyl protease family protein
AT1G47890.1	-1.95436	3.74e-05	receptor like protein 7
AT5G15960.1	-1.95489	5.19e-15	stress-responsive protein (KIN1) / stress-induced protein (KIN1)
AT3G07720.1	-1.96558	3.08e-13	Galactose oxidase/kelch repeat superfamily protein
AT3G60700.1	-1.96873	1.65e-14	Protein of unknown function (DUF1163)
AT4G14690.1	-1.97304	1.41e-05	Chlorophyll A-B binding family protein
AT4G08300.1	-1.9754	1.66e-22	nodulin MtN21 /EamA-like transporter family protein
AT4G22070.1	-1.97562	2.12e-19	WRKY DNA-binding protein 31
AT2G16890.1	-1.97753	8.6e-11	UDP-Glycosyltransferase superfamily protein
AT1G61810.3	-1.98009	5.68e-22	beta-glucosidase 45
AT4G01870.1	-1.98201	5.35e-41	tolB protein-related
AT1G09350.1	-1.98439	1.28e-07	galactinol synthase 3
AT4G33666.1	-1.99464	9.97e-14	unknown protein
AT1G78440.1	-1.99997	6.74e-14	Arabidopsis thaliana gibberellin 2-oxidase 1
AT4G12170.1	-2.0074	0.000595145	Thioredoxin superfamily protein
AT3G21890.1	-2.01316	1.36e-06	B-box type zinc finger family protein
AT5G15725.1	-2.01381	0.000158635	unknown protein
AT3G01060.3	-2.02516	9.2e-12	unknown protein
AT2G43920.3	-2.04568	3.19e-06	S-adenosyl-L-methionine-dependent methyltransferases superfamily protein
AT2G34810.1	-2.05954	7.04e-14	FAD-binding Berberine family protein
AT4G15530.6	-2.06817	4.16e-23	pyruvate orthophosphate dikinase
AT4G15530.1	-2.06817	3.76e-23	pyruvate orthophosphate dikinase
AT4G15530.4	-2.06817	3.24e-23	pyruvate orthophosphate dikinase
AT4G15530.3	-2.0682	2.5e-23	pyruvate orthophosphate dikinase
AT4G15530.5	-2.0697	4.28e-23	pyruvate orthophosphate dikinase
AT4G01430.1	-2.07761	1.23e-22	nodulin MtN21 /EamA-like transporter family protein
AT4G11590.1	-2.08634	0.00071633	F-box associated ubiquitination effector family protein
AT1G73220.1	-2.08745	3.71e-07	organic cation/carnitine transporter1
AT4G15530.2	-2.09273	7.27e-24	pyruvate orthophosphate dikinase
AT1G26700.1	-2.09483	2.15e-15	Seven transmembrane MLO family protein
AT2G45360.1	-2.09731	2.25e-12	Protein of unknown function (DUF1442)
AT2G43920.1	-2.10425	1.99e-06	S-adenosyl-L-methionine-dependent methyltransferases superfamily protein
AT5G62330.1	-2.10585	2.71e-12	unknown protein
AT4G01430.2	-2.10953	9.69e-21	nodulin MtN21 /EamA-like transporter family protein
AT4G08570.1	-2.13449	1.16e-11	Heavy metal transport/detoxification superfamily protein
AT5G64120.1	-2.19024	1.82e-13	Peroxidase superfamily protein
AT3G24400.1	-2.19583	1.71e-06	pseudogene
AT1G13500.1	-2.22209	1.81e-10	Protein of unknown function (DUF1262)
AT1G80340.1	-2.225	1.95e-20	gibberellin 3-oxidase 2
AT1G76430.1	-2.23618	2.61e-12	phosphate transporter 1;9
AT2G43920.2	-2.23698	1.89e-06	S-adenosyl-L-methionine-dependent methyltransferases superfamily protein
AT1G33840.1	-2.24096	0.000348527	Protein of unknown function (DUF567)
AT4G11020.1	-2.2499	8.6e-08	unknown protein
AT1G65481.1	-2.25834	0.000674567	unknown protein
AT4G37950.1	-2.25993	5.82e-07	Rhamnogalacturonate lyase family protein
AT1G29670.1	-2.26763	5.8e-23	GDSL-like Lipase/Acylhydrolase superfamily protein
AT5G52310.1	-2.26832	1.21e-10	low-temperature-responsive protein 78 (LTI78) / desiccation-responsive protein 29A (RD29A)
AT3G21800.1	-2.2936	7.32e-07	UDP-glucosyl transferase 71B8
AT5G28960.1	-2.29442	2.26e-05	unknown protein
AT1G18970.1	-2.29555	1.08e-53	germin-like protein 4
AT4G09110.1	-2.34457	9.56e-06	RING/U-box superfamily protein
AT5G20790.2	-2.36399	2.15e-08	unknown protein
AT4G11100.1	-2.42682	3.75e-09	unknown protein
AT4G14630.1	-2.46584	4.92e-13	germin-like protein 9
AT5G23990.1	-2.51143	1.2e-12	ferric reduction oxidase 5
AT1G48000.1	-2.52077	2.26e-07	myb domain protein 112
AT3G10113.1	-2.52198	1.59e-55	Homeodomain-like superfamily protein
AT1G18330.1	-2.52198	4e-61	Homeodomain-like superfamily protein
AT1G18330.2	-2.53132	5.24e-63	Homeodomain-like superfamily protein
AT1G05650.1	-2.54217	8.14e-06	Pectin lyase-like superfamily protein
AT3G28380.1	-2.54979	4.07e-06	P-glycoprotein 17
AT1G60750.1	-2.55954	6.28e-12	NAD(P)-linked oxidoreductase superfamily protein
AT4G26050.1	-2.59777	3.41e-07	plant intracellular ras group-related LRR 8
AT4G11100.2	-2.62229	1.81e-09	unknown protein
AT2G17330.1	-2.62649	2.62e-07	CYP51G2 (CYTOCHROME P450 51G2)
AT1G61810.2	-2.64586	1.54e-09	beta-glucosidase 45
AT5G26920.1	-2.73446	5.86e-07	Cam-binding protein 60-like G
AT4G31710.1	-2.775	1.36e-06	glutamate receptor 2.4
AT2G19060.1	-2.78294	2.68e-48	SGNH hydrolase-type esterase superfamily protein
AT3G47380.1	-2.8298	3.65e-07	Plant invertase/pectin methylesterase inhibitor superfamily protein
AT1G21140.1	-2.83266	1.99e-20	Vacuolar iron transporter (VIT) family protein
AT5G26920.2	-2.8395	2.32e-07	Cam-binding protein 60-like G
AT1G67980.2	-2.88073	3.17e-06	caffeoyl-CoA 3-O-methyltransferase
AT2G28210.1	-2.91162	2.68e-16	alpha carbonic anhydrase 2
AT4G04450.1	-2.92794	3.01e-26	WRKY family transcription factor
AT5G19700.1	-2.96607	1.15e-05	MATE efflux family protein
AT2G46670.1	-2.99886	3.4e-30	CCT motif family protein
AT4G01630.1	-3.0083	1.01e-30	expansin A17
AT1G01060.5	-3.01704	1.21e-38	Homeodomain-like superfamily protein
AT3G08660.1	-3.02292	7.03e-09	Phototropic-responsive NPH3 family protein
AT1G01060.3	-3.06129	1.48e-41	Homeodomain-like superfamily protein
AT1G01060.2	-3.07204	5.76e-42	Homeodomain-like superfamily protein
AT1G67980.1	-3.08563	3.97e-07	caffeoyl-CoA 3-O-methyltransferase
AT1G01060.1	-3.09499	8.77e-43	Homeodomain-like superfamily protein
AT1G76800.1	-3.12984	1.02e-25	Vacuolar iron transporter (VIT) family protein
AT1G66960.1	-3.13597	3.13e-09	Terpenoid cyclases family protein
AT1G01060.4	-3.1808	1.56e-43	Homeodomain-like superfamily protein
AT5G43570.1	-3.19378	1.7e-16	Serine protease inhibitor, potato inhibitor I-type family protein
AT1G21550.1	-3.22283	3.32e-05	Calcium-binding EF-hand family protein
AT4G22217.1	-3.22304	9.51e-13	Arabidopsis defensin-like protein
AT4G39000.1	-3.22314	2.38e-09	glycosyl hydrolase 9B17
AT2G46790.2	-3.22393	3.17e-44	pseudo-response regulator 9
AT2G46790.1	-3.253	1.37e-43	pseudo-response regulator 9
AT1G05880.2	-3.25713	0.000309086	RING/U-box superfamily protein
AT1G05880.1	-3.25713	0.000309221	RING/U-box superfamily protein
AT3G22840.1	-3.27003	8.54e-44	Chlorophyll A-B binding family protein
AT1G34500.1	-3.27676	8.53e-06	MBOAT (membrane bound O-acyl transferase) family protein
AT5G25260.1	-3.29011	8.25e-07	SPFH/Band 7/PHB domain-containing membrane-associated protein family
AT3G22142.1	-3.31428	9.69e-06	Bifunctional inhibitor/lipid-transfer protein/seed storage 2S albumin superfamily protein
AT4G31970.1	-3.39601	0.000450824	cytochrome P450, family 82, subfamily C, polypeptide 2
AT3G09330.1	-3.45366	5.72e-11	Transmembrane amino acid transporter family protein
AT4G19690.2	-3.48349	2.42e-07	iron-regulated transporter 1
AT1G01580.1	-3.52718	3.6e-07	ferric reduction oxidase 2
AT5G36150.1	-3.53642	6.28e-12	putative pentacyclic triterpene synthase 3
AT4G19690.1	-3.56019	7.08e-07	iron-regulated transporter 1
AT5G15950.2	-3.70963	1.63e-28	Adenosylmethionine decarboxylase family protein
AT5G36140.1	-3.71234	1.37e-38	cytochrome P450, family 716, subfamily A, polypeptide 2
AT5G15950.1	-3.72304	1.87e-27	Adenosylmethionine decarboxylase family protein
AT5G15948.1	-3.75153	8.72e-29	conserved peptide upstream open reading frame 10
AT1G70080.1	-3.75173	0.000674456	Terpenoid cyclases/Protein prenyltransferases superfamily protein
AT5G13320.1	-3.78976	0.000216899	Auxin-responsive GH3 family protein
AT3G09340.1	-3.82149	3.67e-06	Transmembrane amino acid transporter family protein
AT4G29030.1	-3.88485	0.000142037	Putative membrane lipoprotein
AT2G41810.1	-4.13498	8.82e-15	Protein of unknown function, DUF642
AT2G21140.1	-4.13825	2.49e-08	proline-rich protein 2
AT3G54830.1	-4.21582	3.37e-18	Transmembrane amino acid transporter family protein
AT5G36130.1	-4.21965	2.83e-41	Cytochrome P450 superfamily protein
AT1G33670.1	-4.5151	1.16e-08	Leucine-rich repeat (LRR) family protein
AT1G08090.1	-4.91304	7.51e-26	nitrate transporter 2:1
AT2G43890.1	-5.01094	2.68e-36	Pectin lyase-like superfamily protein
AT2G29220.1	-5.03479	1.01e-05	Concanavalin A-like lectin protein kinase family protein
AT5G56080.1	-5.16554	1.26e-19	nicotianamine synthase 2
AT2G05380.2	-5.26253	9.66e-36	glycine-rich protein 3 short isoform
AT2G05380.1	-5.28791	1.02e-34	glycine-rich protein 3 short isoform
AT4G31950.1	-5.36234	1.37e-06	cytochrome P450, family 82, subfamily C, polypeptide 3
AT1G08100.1	-5.70947	1.26e-12	nitrate transporter 2.2
AT1G73120.1	-6.62103	4.78e-15	unknown protein
AT4G31940.1	-6.6971	4.93e-13	cytochrome P450, family 82, subfamily C, polypeptide 4
AT4G06597.1	-7.34884	0.000120884	pseudogene
AT5G54700.1	-7.36758	3.3e-13	Ankyrin repeat family protein
AT5G38910.1	-7.45933	6.12e-11	RmlC-like cupins superfamily protein
AT5G03710.1	-7.47733	8.65e-05	unknown protein
AT3G12900.1	-9.23957	3e-07	2-oxoglutarate (2OG) and Fe(II)-dependent oxygenase superfamily protein

## Sheet: kcs1_2_20 22℃ vs 28℃(DEGs)
Dataset S1. Significantly differentially expressed genes between Col-0 and ksc1/2/20 grown at 22˚C and 28˚C
upregulated genes; 345 (singleton), downregulated genes; 163 (singleton)
Reference ID	logFC kcs1/2/20-Root 22˚C vs 28˚C	adj_pvalue kcs1/2/20-Roo 22˚C vs 28˚C	annotation
AT4G15100.1	7.55881	6.4e-10	serine carboxypeptidase-like 30
AT3G55970.1	6.49458	7.8e-07	jasmonate-regulated gene 21
AT3G28330.1	5.76956	0.000162578	F-box family protein-related
AT2G07692.1	5.68841	0.000269564	unknown protein
AT4G22210.1	5.51397	3.72e-14	low-molecular-weight cysteine-rich 85
AT4G29770.2	5.47208	1.12e-10	unknown protein
AT4G29770.1	5.47195	9.18e-11	unknown protein
AT4G25200.1	5.2702	1.49e-08	mitochondrion-localized small heat shock protein 23.6
AT3G29252.1	4.73452	7.27e-09	pseudogene
AT3G30340.1	4.45048	1.41e-05	nodulin MtN21 /EamA-like transporter family protein
AT3G07920.1	4.39925	3.27e-05	Translation initiation factor IF2/IF5
ATMG00620.1	4.15636	8.78e-07	unknown protein
ATMG00170.1	4.15636	8.78e-07	unknown protein
AT1G23730.1	4.09538	1.79e-13	beta carbonic anhydrase 3
AT2G07722.1	4.07806	3.33e-06	unknown protein
AT5G07060.2	3.86177	8.59e-08	CCCH-type zinc fingerfamily protein with RNA-binding domain
AT5G07060.1	3.86176	9.1e-08	CCCH-type zinc fingerfamily protein with RNA-binding domain
AT2G07718.1	3.66871	1.57e-10	Cytochrome b/b6 protein
ATMG00590.1	3.66871	1.57e-10	Cytochrome b/b6 protein
AT1G35625.1	3.64433	2.49e-12	RING/U-box superfamily protein
AT5G64190.1	3.62187	1.28e-07	unknown protein
AT3G48300.1	3.56292	0.000348315	cytochrome P450, family 71, subfamily A, polypeptide 23
AT1G34047.1	3.51264	3.16e-08	Defensin-like (DEFL) family protein
AT1G72660.1	3.45029	1.82e-22	P-loop containing nucleoside triphosphate hydrolases superfamily protein
AT3G02620.1	3.44346	2.33e-31	Plant stearoyl-acyl-carrier-protein desaturase family protein
AT3G13680.1	3.43165	1.13e-07	F-box and associated interaction domains-containing protein
AT5G20240.1	3.41918	2.01e-18	K-box region and MADS-box transcription factor family protein
ATMG00560.1	3.37932	1.22e-07	Nucleic acid-binding, OB-fold-like protein
AT1G72660.3	3.37655	2.12e-20	P-loop containing nucleoside triphosphate hydrolases superfamily protein
AT3G49620.1	3.36494	0.00051243	2-oxoglutarate (2OG) and Fe(II)-dependent oxygenase superfamily protein
AT2G07696.1	3.32212	2.37e-08	Ribosomal protein S7p/S5e family protein
AT1G61130.1	3.3009	0.000199846	serine carboxypeptidase-like 32
AT2G15780.1	3.29856	1.32e-08	Cupredoxin superfamily protein
AT1G52000.1	3.28177	6.48e-10	Mannose-binding lectin superfamily protein
AT1G72660.2	3.26936	1.03e-19	P-loop containing nucleoside triphosphate hydrolases superfamily protein
AT4G37850.1	3.2315	3.29e-25	basic helix-loop-helix (bHLH) DNA-binding superfamily protein
AT3G05950.1	3.14046	8.59e-07	RmlC-like cupins superfamily protein
AT1G34047.2	3.12676	3.58e-05	Defensin-like (DEFL) family protein
AT1G60970.1	3.09308	0.000195202	SNARE-like superfamily protein
AT3G46230.1	3.0872	1.27e-09	heat shock protein 17.4
ATMG00050.1	3.02982	6.57e-06	unknown protein
AT4G13310.2	3.0223	8.61e-07	cytochrome P450, family 71, subfamily A, polypeptide 20
AT5G02760.1	3.01641	0.000142943	Protein phosphatase 2C family protein
AT2G45940.1	2.99313	4.46e-05	Protein of unknown function (DUF295)
AT5G47600.1	2.95737	1.78e-09	HSP20-like chaperones superfamily protein
AT1G32970.1	2.95314	0.000146993	Subtilisin-like serine endopeptidase family protein
ATCG01000.1	2.95013	3.57e-06	Ycf1 protein
ATMG01270.1	2.94404	0.000163673	mitochondrial ribosomal protein S7
AT5G24770.1	2.92866	3.71e-11	vegetative storage protein 2
AT5G24770.2	2.89595	5.6e-11	vegetative storage protein 2
AT2G28860.1	2.88571	3.08e-07	cytochrome P450, family 710, subfamily A, polypeptide 4
AT1G78750.1	2.76097	1.77e-12	F-box/RNI-like superfamily protein
AT5G48570.1	2.73864	2.73e-72	FKBP-type peptidyl-prolyl cis-trans isomerase family protein
ATMG01090.1	2.72393	1e-11	ATP synthase 9 mitochondrial
ATMG00180.1	2.72289	5.27e-11	cytochrome C biogenesis 452
ATMG00670.1	2.7014	2.72e-05	unknown protein
AT2G07695.1	2.66015	3.26e-05	Cytochrome C oxidase subunit II-like, transmembrane domain
AT1G13790.1	2.65146	6.32e-11	XH/XS domain-containing protein
AT2G07739.1	2.65041	1.98e-09	Ycf1 protein
ATMG00480.1	2.64932	5.05e-09	Plant mitochondrial ATPase, F0 complex, subunit 8 protein
AT2G07707.1	2.64932	5.05e-09	Plant mitochondrial ATPase, F0 complex, subunit 8 protein
AT3G01500.2	2.64322	0.000132995	carbonic anhydrase 1
ATMG01170.1	2.62009	2.91e-11	ATPase, F0 complex, subunit A protein
AT5G55770.1	2.59994	0.000943818	Cysteine/Histidine-rich C1 domain family protein
AT3G01500.1	2.59535	0.000205838	carbonic anhydrase 1
ATMG00370.1	2.59154	1.22e-08	Ycf1 protein
ATMG01280.1	2.58604	1.56e-05	Cytochrome C oxidase subunit II-like, transmembrane domain
AT2G07777.1	2.58369	8.31e-10	ATP synthase 9 mitochondrial
AT5G09570.1	2.58148	5.59e-07	Cox19-like CHCH family protein
AT5G35940.1	2.57747	4.14e-08	Mannose-binding lectin superfamily protein
AT2G03230.1	2.57235	0.000565466	GCK domain-containing protein
AT2G22860.1	2.54953	3.08e-33	phytosulfokine 2 precursor
AT2G07811.1	2.51244	8.32e-27	pseudogene
AT1G73040.1	2.50505	3.78e-06	Mannose-binding lectin superfamily protein
AT1G61440.1	2.50473	7.61e-07	S-locus lectin protein kinase family protein
AT1G70720.1	2.4871	1.43e-07	Plant invertase/pectin methylesterase inhibitor superfamily protein
AT4G28850.1	2.48143	9.28e-06	xyloglucan endotransglucosylase/hydrolase 26
AT5G52640.1	2.47555	4.7e-22	heat shock protein 90.1
AT2G07706.1	2.45222	0.000137931	unknown protein
AT4G10310.1	2.45108	1.63e-27	high-affinity K+ transporter 1
ATMG00160.1	2.44878	1.49e-08	cytochrome oxidase 2
AT1G23840.1	2.41354	0.000296532	unknown protein
AT1G25240.1	2.41096	0.000510427	ENTH/VHS/GAT family protein
AT3G27620.1	2.37466	0.000132995	alternative oxidase 1C
AT1G71280.1	2.37283	2.29e-05	DEA(D/H)-box RNA helicase family protein
AT3G01500.3	2.36706	0.000187021	carbonic anhydrase 1
AT2G07677.1	2.35832	3.04e-07	pseudogene
ATMG00040.1	2.34594	9.76e-10	ATP synthase subunit C family protein
AT5G61290.1	2.33928	9.62e-14	Flavin-binding monooxygenase family protein
ATMG01080.1	2.33889	3.16e-20	mitochondrial F0-ATPase subunit 9
AT2G28850.1	2.33569	3.58e-05	cytochrome P450, family 710, subfamily A, polypeptide 3
AT3G47030.1	2.33558	0.000156107	F-box and associated interaction domains-containing protein
AT2G07671.1	2.33095	4.31e-17	ATP synthase subunit C family protein
AT5G58610.1	2.29379	1.16e-06	PHD finger transcription factor, putative
AT5G41765.1	2.29202	7.26e-05	DNA-binding storekeeper protein-related transcriptional regulator
AT5G47000.1	2.28122	0.000915779	Peroxidase superfamily protein
AT4G15280.1	2.26647	3.93e-09	UDP-glucosyl transferase 71B5
AT5G45150.1	2.25899	6.23e-05	RNAse THREE-like protein 3
AT3G21000.1	2.25086	4.98e-07	Gag-Pol-related retrotransposon family protein
AT1G18400.1	2.21018	0.000114997	BR enhanced expression 1
AT1G36180.2	2.20314	0.000204916	acetyl-CoA carboxylase 2
AT3G59900.1	2.19764	2.11e-07	auxin-regulated gene involved in organ size
AT1G79680.1	2.195	0.000625011	WALL ASSOCIATED KINASE (WAK)-LIKE 10
AT4G27300.1	2.18151	9.98e-06	S-locus lectin protein kinase family protein
AT1G74810.1	2.16424	6.57e-07	HCO3- transporter family
ATMG00690.1	2.16409	1.33e-12	unknown protein
AT5G59590.1	2.16333	3.78e-11	UDP-glucosyl transferase 76E2
AT5G27360.1	2.15164	3.06e-05	Major facilitator superfamily protein
ATMG01360.1	2.13504	1.9e-07	cytochrome oxidase
AT3G19550.1	2.11839	0.000593789	unknown protein
AT3G49580.1	2.11119	2.34e-09	response to low sulfur 1
AT2G07787.1	2.07287	4.62e-05	unknown protein
AT3G30120.1	2.05923	0.000107442	pseudogene
AT2G37870.1	2.05606	2.18e-07	Bifunctional inhibitor/lipid-transfer protein/seed storage 2S albumin superfamily protein
AT5G40990.1	2.03837	7.28e-05	GDSL lipase 1
AT5G60060.1	2.0187	2.03e-05	Protein of unknown function (DUF295)
AT5G51440.1	2.017	1.32e-24	HSP20-like chaperones superfamily protein
AT4G21320.1	2.00168	1.38e-31	Aldolase-type TIM barrel family protein
AT5G44980.1	1.99344	1.08e-06	F-box/RNI-like/FBD-like domains-containing protein
AT5G33355.1	1.9637	0.000579936	Defensin-like (DEFL) family protein
AT3G49580.2	1.95182	1.18e-08	response to low sulfur 1
AT4G14860.1	1.94292	0.000743486	ovate family protein 11
AT5G25450.1	1.93785	1.46e-30	Cytochrome bd ubiquinol oxidase, 14kDa subunit
AT5G25450.2	1.93429	2.95e-23	Cytochrome bd ubiquinol oxidase, 14kDa subunit
AT1G65670.1	1.9341	3.52e-05	cytochrome P450, family 702, subfamily A, polypeptide 1
AT4G12400.1	1.93402	4.1e-49	stress-inducible protein, putative
AT4G12400.2	1.92413	1.05e-45	stress-inducible protein, putative
AT5G37440.1	1.92246	9.32e-16	Chaperone DnaJ-domain superfamily protein
AT2G21640.1	1.91959	2.23e-10	unknown protein
AT5G12110.1	1.91912	2.4e-47	Glutathione S-transferase, C-terminal-like;Translation elongation factor EF1B/ribosomal protein S6
AT5G08600.2	1.91715	1.82e-27	U3 ribonucleoprotein (Utp) family protein
AT5G62210.1	1.91587	1.37e-06	Embryo-specific protein 3, (ATS3)
AT5G08600.1	1.89897	5.7e-29	U3 ribonucleoprotein (Utp) family protein
AT3G29810.1	1.88748	7.07e-18	COBRA-like protein 2 precursor
AT4G08620.1	1.88469	0.00014208	sulphate transporter 1;1
ATMG00730.1	1.86681	0.000394604	cytochrome c oxidase subunit 3
AT1G33055.1	1.85662	0.000318187	unknown protein
AT1G50400.1	1.85264	1.64e-10	Eukaryotic porin family protein
AT4G13190.1	1.84742	0.000187701	Protein kinase superfamily protein
AT5G14840.1	1.84146	5.56e-71	pseudogene
ATMG00080.1	1.83047	0.00087112	ribosomal protein L16
AT2G13580.1	1.82934	2.1e-17	pseudogene
AT4G13310.1	1.82545	0.000128197	cytochrome P450, family 71, subfamily A, polypeptide 20
ATMG00410.1	1.82323	3.07e-05	ATPase subunit 6-1
AT1G45015.2	1.80766	9.55e-16	MD-2-related lipid recognition domain-containing protein
AT1G45015.1	1.79037	1.46e-15	MD-2-related lipid recognition domain-containing protein
AT1G59860.1	1.78837	2.78e-06	HSP20-like chaperones superfamily protein
AT2G37900.1	1.78721	1.51e-07	Major facilitator superfamily protein
AT3G17690.1	1.78602	0.000639045	cyclic nucleotide gated channel 19
ATMG01370.1	1.77625	0.00082545	unknown protein
AT2G01008.1	1.76713	5.06e-05	unknown protein
AT3G48740.1	1.76591	5.64e-05	Nodulin MtN3 family protein
AT1G65970.1	1.76348	2.77e-09	thioredoxin-dependent peroxidase 2
AT2G43660.2	1.75542	3.39e-06	Carbohydrate-binding X8 domain superfamily protein
AT1G07440.1	1.74697	4.91e-05	NAD(P)-binding Rossmann-fold superfamily protein
AT5G41290.1	1.7447	0.00038183	Receptor-like protein kinase-related family protein
AT2G07698.1	1.73791	5.64e-17	ATPase, F1 complex, alpha subunit protein
AT3G47510.1	1.73462	5.35e-14	unknown protein
AT2G36660.1	1.73229	0.000567331	poly(A) binding protein 7
AT3G54530.1	1.72659	2.8e-06	unknown protein
AT2G26740.1	1.71591	7.55e-14	soluble epoxide hydrolase
AT3G12580.1	1.71131	5.57e-16	heat shock protein 70
AT1G64660.1	1.71036	1.61e-11	methionine gamma-lyase
AT4G15330.1	1.70663	1.59e-20	cytochrome P450, family 705, subfamily A, polypeptide 1
AT4G23340.2	1.69814	1.06e-05	2-oxoglutarate (2OG) and Fe(II)-dependent oxygenase superfamily protein
AT2G43660.1	1.69631	1.77e-05	Carbohydrate-binding X8 domain superfamily protein
AT1G44740.1	1.69285	0.000683947	unknown protein
AT2G07783.1	1.68834	1.8e-05	pseudogene
ATMG01190.1	1.68692	7.86e-14	ATP synthase subunit 1
AT2G07741.1	1.67164	0.000355911	ATPase, F0 complex, subunit A protein
AT1G52342.1	1.67088	1.34e-11	unknown protein
AT1G07440.2	1.66145	0.00056427	NAD(P)-binding Rossmann-fold superfamily protein
AT3G01970.1	1.65726	4.28e-11	WRKY DNA-binding protein 45
AT5G48650.1	1.65508	8.78e-10	Nuclear transport factor 2 (NTF2) family protein with RNA binding (RRM-RBD-RNP motifs) domain
AT2G44080.1	1.65189	1.87e-05	ARGOS-like
AT3G24780.1	1.65096	0.000945976	Uncharacterised conserved protein UCP015417, vWA
AT5G09290.1	1.65071	2.56e-13	Inositol monophosphatase family protein
AT5G41300.1	1.65012	3.15e-06	Receptor-like protein kinase-related family protein
AT2G05300.1	1.64993	1.52e-07	pseudogene
AT5G09500.1	1.6469	0.000310515	Ribosomal protein S19 family protein
ATMG01200.1	1.63768	5.38e-05	unknown protein
AT3G51450.1	1.61277	4.77e-14	Calcium-dependent phosphotriesterase superfamily protein
AT2G07699.1	1.60821	0.00069723	pseudogene
AT3G16770.1	1.60771	4.34e-10	ethylene-responsive element binding protein
AT3G57700.1	1.60091	7.94e-05	Protein kinase superfamily protein
AT5G24280.1	1.59947	8.12e-14	gamma-irradiation and mitomycin c induced 1
AT5G17040.1	1.59831	3.07e-06	UDP-Glycosyltransferase superfamily protein
AT2G23620.1	1.57915	6.36e-09	methyl esterase 1
AT2G20720.1	1.57373	0.000164126	Pentatricopeptide repeat (PPR) superfamily protein
ATCG01130.1	1.56823	0.000106504	Ycf1 protein
AT5G38100.1	1.56027	2.83e-08	S-adenosyl-L-methionine-dependent methyltransferases superfamily protein
AT3G50470.1	1.55818	6.39e-08	homolog of RPW8 3
AT1G76100.1	1.55704	4.03e-06	plastocyanin 1
AT3G51220.1	1.55623	0.000191302	Plant protein of unknown function (DUF827)
AT3G53960.1	1.55611	2.76e-07	Major facilitator superfamily protein
AT5G42580.1	1.55097	3.16e-05	cytochrome P450, family 705, subfamily A, polypeptide 12
AT5G38100.2	1.54262	8.21e-07	S-adenosyl-L-methionine-dependent methyltransferases superfamily protein
AT4G23340.1	1.53721	4.78e-05	2-oxoglutarate (2OG) and Fe(II)-dependent oxygenase superfamily protein
AT4G21590.1	1.53717	1.12e-09	endonuclease 3
AT5G23840.1	1.53514	9.79e-12	MD-2-related lipid recognition domain-containing protein
AT3G19700.1	1.52879	8.32e-09	Leucine-rich repeat protein kinase family protein
AT4G21590.2	1.52708	2.39e-09	endonuclease 3
AT1G10770.1	1.52468	0.000392219	Plant invertase/pectin methylesterase inhibitor superfamily protein
AT5G23840.2	1.52263	7.66e-12	MD-2-related lipid recognition domain-containing protein
AT3G19710.1	1.51565	8.27e-13	branched-chain aminotransferase4
AT4G39675.1	1.51309	9.48e-06	unknown protein
AT5G47220.1	1.50042	3.59e-05	ethylene responsive element binding factor 2
AT4G27450.1	1.49927	8.19e-05	Aluminium induced protein with YGL and LRDR motifs
AT5G02180.1	1.49415	3.41e-06	Transmembrane amino acid transporter family protein
AT3G24100.1	1.49237	3.22e-45	Uncharacterised protein family SERF
AT2G19310.1	1.48331	8.32e-19	HSP20-like chaperones superfamily protein
AT1G80440.1	1.4827	0.000160658	Galactose oxidase/kelch repeat superfamily protein
AT2G24680.2	1.48101	0.000181299	transcriptional factor B3 family protein
AT5G64110.1	1.48011	2.03e-07	Peroxidase superfamily protein
AT3G54530.2	1.47141	0.000298577	unknown protein
AT5G66170.3	1.47057	2.38e-18	sulfurtransferase 18
AT2G24680.1	1.46765	7.38e-05	transcriptional factor B3 family protein
AT5G52070.1	1.46135	2.67e-18	Agenet domain-containing protein
AT5G66170.1	1.45677	2.19e-19	sulfurtransferase 18
AT2G07723.1	1.45589	5.89e-08	pseudogene
AT5G23660.1	1.45375	0.000998389	homolog of Medicago truncatula MTN3
AT5G66170.2	1.45258	4.67e-19	sulfurtransferase 18
AT1G65860.1	1.44276	0.000361076	flavin-monooxygenase glucosinolate S-oxygenase 1
AT3G20940.1	1.44241	6.27e-10	cytochrome P450, family 705, subfamily A, polypeptide 30
AT1G60740.1	1.43951	2.52e-13	Thioredoxin superfamily protein
AT2G25900.2	1.43342	8.06e-05	Zinc finger C-x8-C-x5-C-x3-H type family protein
AT1G16370.1	1.43262	2.31e-05	organic cation/carnitine transporter 6
AT1G48700.1	1.43236	0.000333327	2-oxoglutarate (2OG) and Fe(II)-dependent oxygenase superfamily protein
AT2G25900.1	1.43075	8.42e-05	Zinc finger C-x8-C-x5-C-x3-H type family protein
AT2G32740.1	1.42158	0.000898469	galactosyltransferase 13
AT4G39235.1	1.41606	7.17e-07	unknown protein
AT3G47290.1	1.41004	2.2e-05	phosphatidylinositol-speciwc phospholipase C8
AT4G12290.1	1.40737	0.000272037	Copper amine oxidase family protein
AT5G03840.1	1.40612	3.46e-07	PEBP (phosphatidylethanolamine-binding protein) family protein
AT1G15790.1	1.39768	8.3e-09	unknown protein
AT1G64590.1	1.39739	1e-14	NAD(P)-binding Rossmann-fold superfamily protein
AT4G36220.1	1.39256	8.56e-21	ferulic acid 5-hydroxylase 1
AT5G10990.1	1.39199	1.41e-05	SAUR-like auxin-responsive protein family
AT5G07990.1	1.3899	5.9e-06	Cytochrome P450 superfamily protein
AT2G29330.1	1.38532	1.89e-15	tropinone reductase
AT5G59570.1	1.37866	8.28e-10	Homeodomain-like superfamily protein
AT3G48390.1	1.37722	0.00065307	MA3 domain-containing protein
AT4G32480.1	1.37578	2.49e-05	Protein of unknown function (DUF506)
AT1G15790.2	1.37257	2.77e-09	unknown protein
AT2G15880.1	1.36821	5.35e-05	Leucine-rich repeat (LRR) family protein
AT3G23150.1	1.35799	1.07e-05	Signal transduction histidine kinase, hybrid-type, ethylene sensor
AT5G23010.1	1.35648	2.54e-18	methylthioalkylmalate synthase 1
AT2G16586.1	1.35629	2.84e-14	unknown protein
AT1G53060.1	1.35476	0.000180394	Legume lectin family protein
ATMG00090.1	1.35006	0.000270221	structural constituent of ribosome;protein binding
AT1G71380.1	1.34907	1.81e-08	cellulase 3
AT5G53980.1	1.34776	4.16e-06	homeobox protein 52
AT3G02020.1	1.34355	9.62e-14	aspartate kinase 3
AT1G15190.1	1.34023	0.000268419	Fasciclin-like arabinogalactan family protein
AT5G47740.2	1.34008	3.7e-20	Adenine nucleotide alpha hydrolases-like superfamily protein
AT5G47740.1	1.33847	6.91e-20	Adenine nucleotide alpha hydrolases-like superfamily protein
AT1G70700.2	1.32206	0.000193492	TIFY domain/Divergent CCT motif family protein
AT1G70700.1	1.31731	1.12e-05	TIFY domain/Divergent CCT motif family protein
AT5G38410.3	1.31443	1.24e-05	Ribulose bisphosphate carboxylase (small chain) family protein
AT4G20690.1	1.30889	2.51e-06	unknown protein
AT3G11370.1	1.30854	0.000967138	Cysteine/Histidine-rich C1 domain family protein
AT1G64680.1	1.30843	0.000179161	unknown protein
AT2G42850.1	1.30794	3.79e-06	cytochrome P450, family 718
AT1G78490.1	1.30292	7.47e-05	cytochrome P450, family 708, subfamily A, polypeptide 3
AT1G28480.1	1.29946	0.000353461	Thioredoxin superfamily protein
AT2G26370.1	1.29227	1.16e-06	MD-2-related lipid recognition domain-containing protein
AT1G03495.1	1.292	8.91e-22	HXXXD-type acyl-transferase family protein
AT1G02670.1	1.29177	0.000679302	P-loop containing nucleoside triphosphate hydrolases superfamily protein
AT5G02490.1	1.28448	1.01e-10	Heat shock protein 70 (Hsp 70) family protein
AT3G03190.1	1.28086	4.28e-11	glutathione S-transferase F11
AT3G22570.1	1.27617	9.72e-14	Bifunctional inhibitor/lipid-transfer protein/seed storage 2S albumin superfamily protein
AT3G29240.2	1.27438	3.46e-14	Protein of unknown function (DUF179)
AT3G29240.1	1.27263	5.35e-14	Protein of unknown function (DUF179)
AT5G59845.1	1.2665	3.85e-07	Gibberellin-regulated family protein
AT2G41290.1	1.25924	6.6e-15	strictosidine synthase-like 2
AT1G67370.1	1.25896	9.88e-09	DNA-binding HORMA family protein
AT4G37970.1	1.25802	1.76e-07	cinnamyl alcohol dehydrogenase 6
AT5G43330.1	1.25569	4.73e-28	Lactate/malate dehydrogenase family protein
AT4G18510.1	1.25563	2.02e-05	CLAVATA3/ESR-related 2
AT1G53885.1	1.25155	3.21e-13	Protein of unknown function (DUF581)
AT1G53903.1	1.25153	2.94e-13	Protein of unknown function (DUF581)
AT5G38410.2	1.24903	2.17e-05	Ribulose bisphosphate carboxylase (small chain) family protein
AT1G03940.1	1.24551	1.01e-16	HXXXD-type acyl-transferase family protein
AT2G21430.1	1.24389	0.000288524	Papain family cysteine protease
AT3G18610.1	1.23195	5.84e-09	nucleolin like 2
AT5G23830.2	1.22761	8.4e-14	MD-2-related lipid recognition domain-containing protein
AT3G12220.1	1.22648	0.000237449	serine carboxypeptidase-like 16
AT5G10530.1	1.22241	0.000683947	Concanavalin A-like lectin protein kinase family protein
AT5G38410.1	1.22111	0.000326057	Ribulose bisphosphate carboxylase (small chain) family protein
AT5G23830.1	1.20963	7.13e-09	MD-2-related lipid recognition domain-containing protein
AT3G23510.1	1.20864	8.73e-12	Cyclopropane-fatty-acyl-phospholipid synthase
AT4G04810.1	1.20761	9.45e-12	methionine sulfoxide reductase B4
AT5G42590.1	1.20108	2.09e-06	cytochrome P450, family 71, subfamily A, polypeptide 16
AT3G20710.1	1.18773	0.000157008	F-box family protein
AT1G30530.1	1.18369	3.5e-06	UDP-glucosyl transferase 78D1
AT1G30935.1	1.18233	7.05e-06	pseudogene
AT1G43160.1	1.17696	4.8e-07	related to AP2 6
AT3G06437.1	1.17056	1.99e-10	pseudogene
AT5G25130.1	1.16791	0.000402639	cytochrome P450, family 71, subfamily B, polypeptide 12
AT5G38430.1	1.16541	0.000154544	Ribulose bisphosphate carboxylase (small chain) family protein
AT4G11190.1	1.15876	5.41e-07	Disease resistance-responsive (dirigent-like protein) family protein
AT1G30500.2	1.15724	1.36e-06	nuclear factor Y, subunit A7
AT4G04830.2	1.156	1.13e-15	methionine sulfoxide reductase B5
AT2G22980.1	1.15405	9.72e-05	serine carboxypeptidase-like 13
AT4G31330.1	1.15108	7.14e-05	Protein of unknown function, DUF599
AT3G26220.1	1.15061	0.000224919	cytochrome P450, family 71, subfamily B, polypeptide 3
AT4G33120.1	1.1469	4.75e-07	S-adenosyl-L-methionine-dependent methyltransferases superfamily protein
AT4G32200.1	1.1467	2.42e-15	DNA-binding HORMA family protein
AT4G21550.1	1.14664	5.07e-05	VP1/ABI3-like 3
AT2G39210.1	1.14648	2.94e-10	Major facilitator superfamily protein
AT2G32120.2	1.14249	2.58e-09	heat-shock protein 70T-2
AT1G27410.1	1.14203	1.77e-05	DNA repair metallo-beta-lactamase family protein
AT2G46610.1	1.14097	2.29e-09	RNA-binding (RRM/RBD/RNP motifs) family protein
AT4G04830.1	1.14019	5.67e-16	methionine sulfoxide reductase B5
AT1G60010.1	1.13653	7.11e-12	unknown protein
AT2G32120.1	1.13627	1.18e-09	heat-shock protein 70T-2
AT4G22610.1	1.13568	1.63e-05	Bifunctional inhibitor/lipid-transfer protein/seed storage 2S albumin superfamily protein
AT1G10300.1	1.13556	1.78e-08	Nucleolar GTP-binding protein
AT1G51440.1	1.13513	0.0008534	alpha/beta-Hydrolases superfamily protein
AT2G22980.4	1.13446	0.000115186	serine carboxypeptidase-like 13
AT5G42930.1	1.13377	2.26e-05	alpha/beta-Hydrolases superfamily protein
AT5G43540.1	1.1319	3.5e-05	C2H2 and C2HC zinc fingers superfamily protein
AT3G20810.2	1.13111	1.4e-08	2-oxoglutarate (2OG) and Fe(II)-dependent oxygenase superfamily protein
AT2G30550.2	1.12959	6.2e-13	alpha/beta-Hydrolases superfamily protein
AT3G06433.1	1.12727	1.46e-15	pseudogene
AT3G20810.3	1.12669	1.01e-08	2-oxoglutarate (2OG) and Fe(II)-dependent oxygenase superfamily protein
AT5G51810.1	1.12615	9.15e-05	gibberellin 20 oxidase 2
AT2G21080.1	1.12404	0.00037753	unknown protein
AT3G20810.1	1.1226	2.25e-08	2-oxoglutarate (2OG) and Fe(II)-dependent oxygenase superfamily protein
AT2G42720.1	1.12221	2.72e-05	FBD, F-box, Skp2-like and Leucine Rich Repeat domains containing protein
AT1G59740.1	1.12038	2.38e-07	Major facilitator superfamily protein
AT2G30550.1	1.11949	7.3e-11	alpha/beta-Hydrolases superfamily protein
AT2G02610.1	1.11233	3.58e-13	Cysteine/Histidine-rich C1 domain family protein
AT5G56380.1	1.11143	6.86e-10	F-box/RNI-like/FBD-like domains-containing protein
AT1G29465.1	1.10945	0.000710272	unknown protein
AT3G55720.1	1.10863	0.000323918	Protein of unknown function (DUF620)
AT2G22980.2	1.1064	0.000139343	serine carboxypeptidase-like 13
AT3G02610.1	1.10388	3.81e-08	Plant stearoyl-acyl-carrier-protein desaturase family protein
AT3G62410.1	1.10182	5.95e-05	CP12 domain-containing protein 2
AT1G11300.1	1.10086	4.18e-06	protein serine/threonine kinases;protein kinases;ATP binding;sugar binding;kinases;carbohydrate binding
AT1G16410.1	1.09975	1.35e-05	cytochrome p450 79f1
AT1G66020.1	1.09743	1e-06	Terpenoid cyclases/Protein prenyltransferases superfamily protein
AT5G03995.1	1.09476	7.36e-05	unknown protein
AT1G76410.1	1.09277	6.96e-06	RING/U-box superfamily protein
AT1G54680.2	1.09153	0.000123733	unknown protein
AT1G47655.1	1.08804	4.28e-05	Dof-type zinc finger DNA-binding family protein
AT2G22980.3	1.08487	0.000292911	serine carboxypeptidase-like 13
AT5G14800.1	1.08422	5.36e-25	pyrroline-5- carboxylate (P5C) reductase
AT3G49360.1	1.08268	7.44e-07	6-phosphogluconolactonase 2
AT4G13040.2	1.08147	1.27e-07	Integrase-type DNA-binding superfamily protein
AT5G14800.2	1.08	2.46e-24	pyrroline-5- carboxylate (P5C) reductase
AT1G30500.1	1.0786	7.07e-06	nuclear factor Y, subunit A7
AT2G46610.2	1.07652	2.47e-09	RNA-binding (RRM/RBD/RNP motifs) family protein
AT1G34180.2	1.07612	1.81e-05	NAC domain containing protein 16
AT4G15910.1	1.07583	4.51e-10	drought-induced 21
AT2G29500.1	1.07383	2.91e-12	HSP20-like chaperones superfamily protein
AT3G10120.1	1.0713	8.17e-06	unknown protein
AT1G54050.1	1.07098	0.000528923	HSP20-like chaperones superfamily protein
AT5G13930.1	1.07083	0.000348159	Chalcone and stilbene synthase family protein
AT1G10460.1	1.07071	0.000390108	germin-like protein 7
AT1G16410.2	1.06625	2.92e-05	cytochrome p450 79f1
AT1G03400.1	1.06517	0.00041218	2-oxoglutarate (2OG) and Fe(II)-dependent oxygenase superfamily protein
AT1G12775.1	1.06449	7.45e-08	Pentatricopeptide repeat (PPR) superfamily protein
AT4G26270.1	1.05862	6.95e-09	phosphofructokinase 3
AT2G26530.2	1.05842	0.000357643	Protein of unknown function (DUF1645)
AT2G02640.1	1.05777	3.51e-07	Cysteine/Histidine-rich C1 domain family protein
AT1G58340.1	1.05645	7.63e-07	MATE efflux family protein
AT5G14340.1	1.05279	0.000745129	myb domain protein 40
AT1G65060.2	1.04919	6.35e-05	4-coumarate:CoA ligase 3
AT3G23480.1	1.04832	4.77e-05	Cyclopropane-fatty-acyl-phospholipid synthase
AT5G18040.1	1.04089	2.32e-14	unknown protein
AT5G56370.1	1.04057	0.000517938	F-box/RNI-like/FBD-like domains-containing protein
AT2G26530.1	1.04007	0.000282978	Protein of unknown function (DUF1645)
AT1G54680.1	1.03585	0.000685631	unknown protein
AT3G26510.5	1.03564	1.74e-05	Octicosapeptide/Phox/Bem1p family protein
AT1G34180.1	1.03469	1.8e-05	NAC domain containing protein 16
AT3G01900.1	1.03459	1.56e-05	cytochrome P450, family 94, subfamily B, polypeptide 2
AT2G07717.1	1.03066	7.45e-08	pseudogene
AT5G67110.2	1.02928	0.000233595	basic helix-loop-helix (bHLH) DNA-binding superfamily protein
AT3G54260.1	1.02914	1.25e-15	TRICHOME BIREFRINGENCE-LIKE 36
AT3G32040.1	1.02877	4.28e-05	Terpenoid synthases superfamily protein
AT1G72900.1	1.02652	0.000410662	Toll-Interleukin-Resistance (TIR) domain-containing protein
AT5G23020.1	1.02516	1.54e-15	2-isopropylmalate synthase 2
AT4G37700.1	1.02383	4.31e-06	unknown protein
AT1G71990.1	1.02272	5.06e-06	fucosyltransferase 13
AT5G07650.1	1.02073	2.01e-09	Actin-binding FH2 protein
AT5G60100.1	1.02029	2.49e-05	pseudo-response regulator 3
AT4G21326.1	1.01759	6.11e-05	subtilase 3.12
AT1G05385.1	1.01351	4.93e-06	photosystem II 11 kDa protein-related
AT2G34350.1	1.01322	0.000967138	Nodulin-like / Major Facilitator Superfamily protein
AT1G23850.1	1.01248	7.31e-09	unknown protein
AT5G42650.1	1.01081	2.87e-11	allene oxide synthase
AT1G65060.1	1.00728	0.000143998	4-coumarate:CoA ligase 3
AT5G60100.2	1.00726	2.94e-05	pseudo-response regulator 3
AT3G26510.1	1.00576	2.44e-05	Octicosapeptide/Phox/Bem1p family protein
AT3G13090.1	-1.00111	1.92e-07	multidrug resistance-associated protein 8
AT1G17180.1	-1.00179	3.85e-06	glutathione S-transferase TAU 25
AT1G52510.2	-1.00367	0.000133547	alpha/beta-Hydrolases superfamily protein
AT1G77080.2	-1.00781	1.87e-15	K-box region and MADS-box transcription factor family protein
AT4G21620.1	-1.00916	9.78e-08	glycine-rich protein
AT1G55110.1	-1.018	5.65e-11	indeterminate(ID)-domain 7
AT1G18330.2	-1.01866	4.43e-10	Homeodomain-like superfamily protein
AT1G18330.1	-1.02066	6.35e-10	Homeodomain-like superfamily protein
AT1G61810.3	-1.02745	3.32e-06	beta-glucosidase 45
AT4G38400.1	-1.03082	8.54e-05	expansin-like A2
AT4G01430.2	-1.03546	3.82e-05	nodulin MtN21 /EamA-like transporter family protein
AT3G10113.1	-1.04595	5.87e-09	Homeodomain-like superfamily protein
AT1G70800.1	-1.04932	5.57e-05	Calcium-dependent lipid-binding (CaLB domain) family protein
AT1G35250.1	-1.05484	6.12e-08	Thioesterase superfamily protein
AT1G07550.1	-1.05738	1.15e-05	Leucine-rich repeat protein kinase family protein
AT2G45560.1	-1.06208	3.13e-10	cytochrome P450, family 76, subfamily C, polypeptide 1
AT2G28270.1	-1.06684	8.95e-05	Cysteine/Histidine-rich C1 domain family protein
AT2G20340.1	-1.06687	3.29e-07	Pyridoxal phosphate (PLP)-dependent transferases superfamily protein
AT1G77080.5	-1.07165	1.36e-17	K-box region and MADS-box transcription factor family protein
AT1G11330.1	-1.07362	1.18e-07	S-locus lectin protein kinase family protein
AT1G11330.2	-1.07555	1.24e-07	S-locus lectin protein kinase family protein
AT3G47790.1	-1.08414	7.86e-12	ABC2 homolog 7
AT2G45660.1	-1.08524	7.29e-08	AGAMOUS-like 20
AT3G44550.1	-1.08985	1.23e-09	fatty acid reductase 5
AT3G14770.1	-1.09888	3.75e-11	Nodulin MtN3 family protein
AT2G33770.1	-1.09939	6.38e-11	phosphate 2
AT4G01430.1	-1.11036	1.51e-06	nodulin MtN21 /EamA-like transporter family protein
AT3G21670.1	-1.11545	0.000714085	Major facilitator superfamily protein
AT5G57180.2	-1.11607	1.44e-06	chloroplast import apparatus 2
ATCG00190.1	-1.13041	0.000669969	RNA polymerase subunit beta
AT1G78340.1	-1.13308	1.51e-16	glutathione S-transferase TAU 22
AT1G61810.1	-1.13642	1.66e-07	beta-glucosidase 45
AT3G16560.1	-1.14292	1.03e-19	Protein phosphatase 2C family protein
AT2G38540.1	-1.14368	3.07e-08	lipid transfer protein 1
AT1G77080.4	-1.14624	4.09e-22	K-box region and MADS-box transcription factor family protein
AT1G78230.1	-1.1475	4.31e-05	Outer arm dynein light chain 1 protein
AT2G28100.1	-1.15015	1.63e-19	alpha-L-fucosidase 1
AT5G48070.1	-1.16334	0.00030409	xyloglucan endotransglucosylase/hydrolase 20
AT1G76020.1	-1.17491	1.59e-11	Thioredoxin superfamily protein
AT2G16890.1	-1.17758	0.000366524	UDP-Glycosyltransferase superfamily protein
AT5G05410.1	-1.1849	6.12e-08	DRE-binding protein 2A
AT4G30110.1	-1.19072	1.34e-11	heavy metal atpase 2
AT1G73810.1	-1.19418	0.000603029	Core-2/I-branching beta-1,6-N-acetylglucosaminyltransferase family protein
AT1G57770.1	-1.19863	0.000562066	FAD/NAD(P)-binding oxidoreductase family protein
AT1G29670.1	-1.20108	6.22e-12	GDSL-like Lipase/Acylhydrolase superfamily protein
AT5G57180.1	-1.20144	1.22e-07	chloroplast import apparatus 2
AT4G25960.1	-1.20535	1.1e-08	P-glycoprotein 2
AT5G17460.1	-1.21873	4.34e-11	unknown protein
AT5G05410.2	-1.22395	3.93e-08	DRE-binding protein 2A
AT1G76800.1	-1.22411	0.000757744	Vacuolar iron transporter (VIT) family protein
AT4G34881.1	-1.22789	1.22e-15	unknown protein
AT1G78460.1	-1.23456	2.92e-05	SOUL heme-binding family protein
AT5G14780.1	-1.23629	6.12e-15	formate dehydrogenase
AT2G16890.2	-1.23947	9.35e-05	UDP-Glycosyltransferase superfamily protein
AT5G57180.3	-1.23978	5.53e-07	chloroplast import apparatus 2
AT4G34135.1	-1.25134	5.35e-14	UDP-glucosyltransferase 73B2
AT2G26820.1	-1.25575	7.78e-14	phloem protein 2-A3
AT2G15090.1	-1.25735	3.2e-07	3-ketoacyl-CoA synthase 8
AT1G17170.1	-1.25899	4.05e-21	glutathione S-transferase TAU 24
AT4G34135.2	-1.26289	3.01e-19	UDP-glucosyltransferase 73B2
AT5G10100.1	-1.265	1.66e-06	Haloacid dehalogenase-like hydrolase (HAD) superfamily protein
AT3G55330.1	-1.2715	0.000450231	PsbP-like protein 1
AT4G01630.1	-1.27623	2.97e-06	expansin A17
AT5G54770.1	-1.27823	1.37e-17	thiazole biosynthetic enzyme, chloroplast (ARA6) (THI1) (THI4)
AT5G25610.1	-1.29018	1.02e-06	BURP domain-containing protein
AT5G43780.1	-1.29162	3e-12	Pseudouridine synthase/archaeosine transglycosylase-like family protein
AT3G01260.1	-1.29304	4.19e-27	Galactose mutarotase-like superfamily protein
AT4G28940.1	-1.29587	1.52e-16	Phosphorylase superfamily protein
AT5G25250.1	-1.29856	2.06e-05	SPFH/Band 7/PHB domain-containing membrane-associated protein family
AT4G33070.1	-1.30209	2.83e-06	Thiamine pyrophosphate dependent pyruvate decarboxylase family protein
AT1G07720.1	-1.31156	7.66e-05	3-ketoacyl-CoA synthase 3
AT5G44578.1	-1.3294	6.7e-05	unknown protein
AT5G64700.1	-1.36863	9.07e-09	nodulin MtN21 /EamA-like transporter family protein
AT4G12310.1	-1.38212	1.84e-06	cytochrome P450, family 706, subfamily A, polypeptide 5
AT4G02280.1	-1.39294	5.83e-10	sucrose synthase 3
AT2G43590.1	-1.39649	5.62e-09	Chitinase family protein
AT3G22840.1	-1.40165	3.63e-10	Chlorophyll A-B binding family protein
AT1G78440.1	-1.41423	0.000370777	Arabidopsis thaliana gibberellin 2-oxidase 1
AT2G19060.1	-1.4158	1.65e-11	SGNH hydrolase-type esterase superfamily protein
AT1G66950.1	-1.41728	7.04e-08	pleiotropic drug resistance 11
AT2G02120.1	-1.42277	0.000120338	Scorpion toxin-like knottin superfamily protein
AT4G01870.1	-1.43887	6.66e-22	tolB protein-related
AT3G22060.1	-1.43925	6.38e-12	Receptor-like protein kinase-related family protein
AT2G43500.1	-1.46865	9.06e-07	Plant regulator RWP-RK family protein
AT4G19970.1	-1.47263	1.56e-05	unknown protein
AT5G23990.1	-1.47934	8.49e-05	ferric reduction oxidase 5
AT4G14630.1	-1.47946	3.76e-05	germin-like protein 9
AT2G43500.2	-1.47978	6.11e-07	Plant regulator RWP-RK family protein
AT1G73602.1	-1.50091	2.11e-09	conserved peptide upstream open reading frame 32
AT1G73600.1	-1.50233	2e-09	S-adenosyl-L-methionine-dependent methyltransferases superfamily protein
AT1G73600.2	-1.5077	2.26e-09	S-adenosyl-L-methionine-dependent methyltransferases superfamily protein
AT5G50200.3	-1.51061	2.56e-28	nitrate transmembrane transporters
AT5G50200.2	-1.51208	1.41e-28	nitrate transmembrane transporters
AT5G50200.1	-1.51811	1.17e-28	nitrate transmembrane transporters
AT1G53660.1	-1.52486	0.000321825	nodulin MtN21 /EamA-like transporter family protein
AT1G06830.1	-1.53317	4.03e-06	Glutaredoxin family protein
AT1G09350.1	-1.5404	0.000270029	galactinol synthase 3
AT5G15950.2	-1.55119	2.45e-06	Adenosylmethionine decarboxylase family protein
AT1G21400.1	-1.55702	2.4e-06	Thiamin diphosphate-binding fold (THDP-binding) superfamily protein
AT5G62330.1	-1.55762	0.000136449	unknown protein
AT1G72490.1	-1.57049	7.98e-08	unknown protein
AT5G15948.1	-1.57175	2.14e-06	conserved peptide upstream open reading frame 10
AT4G15530.2	-1.57216	1.12e-13	pyruvate orthophosphate dikinase
AT5G15950.1	-1.58163	2.72e-06	Adenosylmethionine decarboxylase family protein
AT4G15530.3	-1.58487	8.4e-14	pyruvate orthophosphate dikinase
AT4G15530.6	-1.58863	9.58e-14	pyruvate orthophosphate dikinase
AT4G15530.1	-1.58863	9.09e-14	pyruvate orthophosphate dikinase
AT4G15530.4	-1.58863	8.4e-14	pyruvate orthophosphate dikinase
AT4G15530.5	-1.59046	9.56e-14	pyruvate orthophosphate dikinase
AT4G23496.1	-1.60121	8.36e-10	SPIRAL1-like5
AT1G77080.3	-1.60767	1.56e-07	K-box region and MADS-box transcription factor family protein
AT1G74670.1	-1.62686	2.13e-08	Gibberellin-regulated family protein
AT1G24575.1	-1.63371	1.38e-06	unknown protein
AT1G22630.1	-1.65507	1.42e-06	unknown protein
AT2G13360.2	-1.66508	1.75e-11	alanine:glyoxylate aminotransferase
AT2G13360.1	-1.67281	1.02e-11	alanine:glyoxylate aminotransferase
AT1G01060.4	-1.69291	2.76e-10	Homeodomain-like superfamily protein
AT4G23700.1	-1.69406	1.38e-18	cation/H+ exchanger 17
AT5G52310.1	-1.73828	2.62e-06	low-temperature-responsive protein 78 (LTI78) / desiccation-responsive protein 29A (RD29A)
AT3G50970.1	-1.7384	8.16e-37	dehydrin family protein
AT1G01060.5	-1.74071	3.62e-10	Homeodomain-like superfamily protein
AT1G75030.1	-1.74142	1.13e-12	thaumatin-like protein 3
AT4G11020.1	-1.74751	6.59e-05	unknown protein
AT3G46270.1	-1.74938	1.84e-07	receptor protein kinase-related
AT4G15490.1	-1.7589	2.05e-11	UDP-Glycosyltransferase superfamily protein
AT5G15960.1	-1.7638	1.35e-11	stress-responsive protein (KIN1) / stress-induced protein (KIN1)
AT1G01060.3	-1.76516	6.63e-11	Homeodomain-like superfamily protein
AT1G10060.3	-1.76601	0.000427676	branched-chain amino acid transaminase 1
AT1G69230.2	-1.76787	9.24e-10	SPIRAL1-like2
AT2G05510.6	-1.77051	0.000505389	Glycine-rich protein family
AT2G05510.2	-1.77804	0.000725537	Glycine-rich protein family
AT2G05510.5	-1.78065	0.000767394	Glycine-rich protein family
AT2G05510.3	-1.78528	0.0005562	Glycine-rich protein family
AT2G05510.1	-1.79383	0.000937908	Glycine-rich protein family
AT2G05510.4	-1.79439	0.000686012	Glycine-rich protein family
AT1G69230.1	-1.79466	2.08e-10	SPIRAL1-like2
AT1G30990.1	-1.81064	4.51e-10	Polyketide cyclase/dehydrase and lipid transport superfamily protein
AT1G01060.1	-1.81717	7.04e-12	Homeodomain-like superfamily protein
AT1G01060.2	-1.82157	1.18e-11	Homeodomain-like superfamily protein
AT4G30650.1	-1.82785	9.14e-11	Low temperature and salt responsive protein family
AT5G64120.1	-1.83234	2.09e-09	Peroxidase superfamily protein
AT2G46670.1	-1.83687	2.23e-10	CCT motif family protein
AT3G14810.2	-1.84304	7.54e-22	mechanosensitive channel of small conductance-like 5
AT1G04500.1	-1.8431	3.87e-05	CCT motif family protein
AT3G09400.1	-1.84379	8.61e-07	pol-like 3
AT5G39720.1	-1.85556	0.00099728	avirulence induced gene 2 like protein
AT3G09400.2	-1.87394	6.19e-07	pol-like 3
AT1G80340.1	-1.87862	6.22e-13	gibberellin 3-oxidase 2
AT3G14810.1	-1.88805	3.05e-24	mechanosensitive channel of small conductance-like 5
AT2G46790.2	-1.90912	2.42e-15	pseudo-response regulator 9
AT5G20790.1	-1.9193	3.3e-08	unknown protein
AT3G46250.1	-1.92271	4.03e-06	pseudogene
AT2G46790.1	-1.93172	2.19e-15	pseudo-response regulator 9
AT4G35770.3	-1.93843	0.000714298	Rhodanese/Cell cycle control phosphatase superfamily protein
AT4G35770.2	-1.94676	0.000848145	Rhodanese/Cell cycle control phosphatase superfamily protein
AT4G35770.1	-1.97307	0.000480784	Rhodanese/Cell cycle control phosphatase superfamily protein
AT5G12280.2	-1.98874	7.62e-06	SWAP (Suppressor-of-White-APricot)/surp RNA-binding domain-containing protein
AT5G20790.2	-2.01588	1.28e-07	unknown protein
AT5G12280.1	-2.02026	0.000159227	SWAP (Suppressor-of-White-APricot)/surp RNA-binding domain-containing protein
AT5G12270.1	-2.05055	9.62e-14	2-oxoglutarate (2OG) and Fe(II)-dependent oxygenase superfamily protein
AT2G26440.1	-2.12984	1.21e-08	Plant invertase/pectin methylesterase inhibitor superfamily
AT4G01390.1	-2.19879	8.46e-13	TRAF-like family protein
AT5G36150.1	-2.27321	0.000189828	putative pentacyclic triterpene synthase 3
AT1G47890.1	-2.27443	9.06e-07	receptor like protein 7
AT4G01060.2	-2.29013	0.000132007	CAPRICE-like MYB3
AT3G09922.1	-2.29554	0.000912978	induced by phosphate starvation1
AT4G12500.1	-2.29762	5.15e-05	Bifunctional inhibitor/lipid-transfer protein/seed storage 2S albumin superfamily protein
AT5G36130.1	-2.30007	8.01e-13	Cytochrome P450 superfamily protein
AT3G60140.1	-2.32978	0.000571365	Glycosyl hydrolase superfamily protein
AT4G01060.1	-2.38546	0.000248582	CAPRICE-like MYB3
AT1G76430.1	-2.42187	7.38e-18	phosphate transporter 1;9
AT4G36850.1	-2.45299	0.000231209	PQ-loop repeat family protein / transmembrane family protein
AT2G04570.1	-2.47737	8.62e-05	GDSL-like Lipase/Acylhydrolase superfamily protein
AT2G28210.1	-2.4854	6.81e-11	alpha carbonic anhydrase 2
AT1G55120.1	-2.49878	1.29e-38	beta-fructofuranosidase 5
AT1G01580.1	-2.49914	0.000582085	ferric reduction oxidase 2
AT1G57980.1	-2.53453	1.16e-05	Nucleotide-sugar transporter family protein
AT1G55120.3	-2.54516	2.77e-35	beta-fructofuranosidase 5
AT1G08090.1	-2.5584	1.51e-07	nitrate transporter 2:1
AT1G55120.2	-2.56214	2.4e-39	beta-fructofuranosidase 5
AT4G18422.1	-2.6423	6.25e-05	unknown protein
AT5G17165.1	-2.6439	1.04e-06	unknown protein
AT1G26240.1	-2.75085	2.87e-24	Proline-rich extensin-like family protein
AT4G08570.1	-2.78696	4.03e-17	Heavy metal transport/detoxification superfamily protein
AT4G04450.1	-2.80696	2.16e-22	WRKY family transcription factor
AT4G11100.2	-2.83114	8.48e-07	unknown protein
AT4G11100.1	-2.83115	8.34e-07	unknown protein
AT5G36140.1	-2.86458	2.68e-20	cytochrome P450, family 716, subfamily A, polypeptide 2
AT5G56080.1	-2.87884	1.3e-06	nicotianamine synthase 2
AT3G54830.1	-2.92651	1.03e-05	Transmembrane amino acid transporter family protein
AT1G73120.1	-2.94703	0.000290323	unknown protein
AT2G26695.1	-2.99062	1.53e-07	Ran BP2/NZF zinc finger-like superfamily protein
AT1G18830.1	-3.15306	3.4e-05	Transducin/WD40 repeat-like superfamily protein
AT5G65980.1	-3.18878	1.18e-06	Auxin efflux carrier family protein
AT4G22217.1	-3.37665	4.02e-11	Arabidopsis defensin-like protein
AT3G21800.1	-3.39759	5.27e-06	UDP-glucosyl transferase 71B8
AT5G19700.1	-3.40414	5.6e-05	MATE efflux family protein
AT4G39000.1	-3.43193	8.35e-06	glycosyl hydrolase 9B17
AT3G28510.1	-3.50034	0.000140195	P-loop containing nucleoside triphosphate hydrolases superfamily protein
AT3G47340.2	-3.71055	1.87e-08	glutamine-dependent asparagine synthase 1
AT3G47340.3	-3.76675	2.9e-08	glutamine-dependent asparagine synthase 1
AT3G47340.1	-3.79077	1.94e-08	glutamine-dependent asparagine synthase 1
AT4G12490.1	-3.86546	4.05e-05	Bifunctional inhibitor/lipid-transfer protein/seed storage 2S albumin superfamily protein
AT3G22142.1	-4.30528	8.93e-30	Bifunctional inhibitor/lipid-transfer protein/seed storage 2S albumin superfamily protein
AT2G05380.1	-4.48866	4.94e-27	glycine-rich protein 3 short isoform
AT2G05380.2	-4.49973	3.47e-28	glycine-rich protein 3 short isoform
AT4G31940.1	-4.5584	6.37e-07	cytochrome P450, family 82, subfamily C, polypeptide 4
AT1G34500.1	-5.88779	3.34e-05	MBOAT (membrane bound O-acyl transferase) family protein
AT4G06597.1	-7.35507	0.000256554	pseudogene
AT5G03710.1	-7.4838	0.000171429	unknown protein

## Sheet: Col-0 up_@28˚C (vskcs)
Dataset S1. Significantly differentially expressed genes between Col-0 and ksc1/2/20 grown at 22˚C and 28˚C
Col-0 22 vs Col-0 28 ℃ p-value < 0.05, logFC > 0.7 Col-0 28 vs kcs 28 ℃ p-value < 0.05, logFC < -0.25	DEG → 335 genes (singleton)
Reference ID	logFC Col-0-Root 22˚C vs 28˚C	adj-pvalue Col-0-Root 22˚C vs 28˚C	logFC kcs1/2/20-Root 22˚C vs 28˚C	adj-pvalue kcs1/2/20-Root 22˚C vs 28˚C	logFC Col-0-root 28˚C vs kcs1/2/20-root 28˚C	adj-pvalue Col-0-root 28˚C vs kcs1/2/20-root 28˚C	annotation
ATMG00180.1	3.52722	6.84e-27	2.72289	5.27e-11	-0.811691	0.00525978	cytochrome C biogenesis 452
AT2G07723.1	2.14662	2.5e-24	1.45589	5.89e-08	-0.979847	6.05e-06	pseudogene
AT2G07677.1	3.83662	4.16e-22	2.35832	3.04e-07	-0.911977	0.00812911	pseudogene
AT2G18050.2	0.781951	0.0063457	-0.264671	0.573821	-1.27251	1.92e-05	histone H1-3
AT3G20810.3	3.09188	2.78e-53	1.12669	1.01e-08	-0.482928	0.0336402	2-oxoglutarate (2OG) and Fe(II)-dependent oxygenase superfamily protein
AT3G20810.2	3.10245	3.07e-53	1.13111	1.4e-08	-0.533753	0.0175352	2-oxoglutarate (2OG) and Fe(II)-dependent oxygenase superfamily protein
ATMG01090.1	2.747	2.03e-18	2.72393	1e-11	-0.719129	0.0360122	ATP synthase 9 mitochondrial
AT2G18050.1	0.789766	0.00468232	-0.269546	0.542687	-1.29925	6.55e-06	histone H1-3
AT3G20810.1	3.09838	1.24e-52	1.1226	2.25e-08	-0.541465	0.0167099	2-oxoglutarate (2OG) and Fe(II)-dependent oxygenase superfamily protein
AT5G40850.2	0.752405	8.1e-09	-0.287493	0.0789103	-0.733342	1.3e-07	urophorphyrin methylase 1
AT5G40850.1	0.752916	9.7e-09	-0.286081	0.0825393	-0.730237	1.81e-07	urophorphyrin methylase 1
AT5G20420.1	1.36488	6.14e-07	1.31989	0.00148789	-0.964289	0.00229399	chromatin remodeling 42
AT1G48300.1	0.755859	9.52e-07	0.595257	0.000389163	-0.544047	0.00257306	unknown protein
ATMG00970.1	5.23959	0.00140722	0.114394	1	-3.20652	0.0361178	unknown protein
AT3G53960.1	1.49991	7.8e-09	1.55611	2.76e-07	-0.654369	0.0492211	Major facilitator superfamily protein
AT3G53980.2	1.19322	1.94e-10	0.415356	0.0760421	-0.638077	0.0048306	Bifunctional inhibitor/lipid-transfer protein/seed storage 2S albumin superfamily protein
AT3G53980.1	1.17977	1.01e-09	0.411495	0.089743	-0.633832	0.00706353	Bifunctional inhibitor/lipid-transfer protein/seed storage 2S albumin superfamily protein
AT2G29130.1	1.02519	0.0046161	1.10572	0.00533005	-0.905156	0.0407324	laccase 2
AT4G16640.1	0.828996	0.00348796	-0.107674	0.946143	-0.876442	0.00909889	Matrixin family protein
AT3G03470.1	1.08401	6.34e-10	0.610486	0.00555258	-0.714011	0.000349645	cytochrome P450, family 87, subfamily A, polypeptide 9
AT4G26580.1	0.744821	0.000345002	0.525439	0.0859551	-0.630745	0.012491	RING/U-box superfamily protein
AT4G26580.2	0.723761	0.000350764	0.583883	0.0385049	-0.590516	0.0185441	RING/U-box superfamily protein
AT3G19580.1	0.75036	9.1e-05	0.456218	0.0613937	-0.59344	0.0100879	zinc-finger protein 2
AT3G45160.1	0.861484	8.24e-06	0.179614	0.58613	-1.32954	1.17e-11	Putative membrane lipoprotein
AT3G19580.2	0.813841	3.24e-05	0.413861	0.11246	-0.658443	0.00460774	zinc-finger protein 2
AT3G26450.1	1.20641	1.34e-10	0.0843741	0.934897	-4.34399	7.53e-98	Polyketide cyclase/dehydrase and lipid transport superfamily protein
AT3G03870.1	0.859031	0.000246012	0.525196	0.0836897	-0.740376	0.00763726	unknown protein
AT2G15880.1	1.18358	3.46e-05	1.36821	5.35e-05	-1.13607	0.000410263	Leucine-rich repeat (LRR) family protein
AT2G46250.1	1.44633	3.11e-09	0.864554	0.00631507	-0.604672	0.0459804	myosin heavy chain-related
AT4G36550.1	0.706183	5.24e-05	0.0660253	0.951513	-0.896988	3.14e-06	ARM repeat superfamily protein
AT3G45070.1	1.10755	9.63e-10	0.811486	5.3e-05	-0.602946	0.00609469	P-loop containing nucleoside triphosphate hydrolases superfamily protein
AT1G64590.1	1.13106	1.16e-10	1.39739	1e-14	-0.688618	0.000727891	NAD(P)-binding Rossmann-fold superfamily protein
AT5G63710.1	0.859555	1.38e-14	0.474196	0.000267503	-0.390515	0.00366856	Leucine-rich repeat protein kinase family protein
AT3G03870.2	0.837622	9.17e-05	0.441699	0.116143	-0.768392	0.00177965	unknown protein
AT3G29680.1	1.28246	2.85e-10	0.623955	0.0155948	-0.550601	0.0273078	HXXXD-type acyl-transferase family protein
AT3G07930.1	0.747574	2.57e-05	0.0942863	0.866103	-0.474981	0.0349716	DNA glycosylase superfamily protein
AT3G07930.2	0.741483	3.63e-05	0.0885538	0.889335	-0.487762	0.0315802	DNA glycosylase superfamily protein
AT4G36930.1	0.717362	0.000681441	0.558102	0.051296	-1.24326	1.86e-08	basic helix-loop-helix (bHLH) DNA-binding superfamily protein
AT1G14790.1	1.09404	3.11e-15	0.428297	0.0105176	-0.402853	0.0218264	RNA-dependent RNA polymerase 1
AT4G33960.1	1.09105	1.81e-11	0.171918	0.559139	-0.477897	0.0183058	unknown protein
AT3G10200.1	1.14498	7.1e-07	0.0153932	1	-0.81847	0.00242528	S-adenosyl-L-methionine-dependent methyltransferases superfamily protein
AT1G68050.1	1.07947	1.83e-05	-0.470205	0.13724	-0.678457	0.0320533	flavin-binding, kelch repeat, f box 1
AT4G29780.1	2.68004	8.14e-10	0.0346139	1	-2.40327	2.04e-07	unknown protein
AT5G44350.1	0.792771	0.000913166	0.0554642	1	-0.938595	0.000376248	ethylene-responsive nuclear protein -related
AT3G16920.1	0.723149	4.14e-09	0.473239	0.000757744	-0.520929	0.000192298	chitinase-like protein 2
AT4G20230.1	0.881792	1.17e-07	0.254424	0.295317	-0.675886	0.000366718	Terpenoid cyclases/Protein prenyltransferases superfamily protein
AT5G59440.1	0.964045	1.19e-17	0.956203	2.19e-15	-0.35489	0.0133687	P-loop containing nucleoside triphosphate hydrolases superfamily protein
AT5G59440.2	0.97213	4.32e-18	0.955679	1.65e-15	-0.358673	0.0115178	P-loop containing nucleoside triphosphate hydrolases superfamily protein
AT5G59440.3	0.981811	1.35e-18	0.957967	1.26e-15	-0.359206	0.0108793	P-loop containing nucleoside triphosphate hydrolases superfamily protein
AT5G47050.1	0.753838	1.15e-13	0.654989	1.41e-09	-0.28303	0.0353234	SBP (S-ribonuclease binding protein) family protein
AT3G54260.1	1.49307	2.96e-33	1.02914	1.25e-15	-0.471716	0.00169085	TRICHOME BIREFRINGENCE-LIKE 36
AT1G28660.1	1.0424	1.47e-05	0.671485	0.0385686	-0.745015	0.0101465	GDSL-like Lipase/Acylhydrolase superfamily protein
AT2G01990.1	1.42898	2.23e-21	0.295525	0.151788	-0.519323	0.0027837	unknown protein
AT1G28620.1	0.800002	0.000465538	0.674111	0.0263801	-0.601111	0.0348316	pseudogene
AT2G23430.1	0.836751	9.35e-05	-0.240518	0.543656	-0.841116	0.000693518	Cyclin-dependent kinase inhibitor family protein
AT5G04370.1	0.724472	0.0454129	1.13161	0.00596333	-1.02118	0.0107278	S-adenosyl-L-methionine-dependent methyltransferases superfamily protein
AT1G61600.1	0.748257	8.36e-06	0.0437579	1	-0.443595	0.038546	Protein of unknown function (DUF1262)
AT4G31290.1	0.954743	8.36e-23	0.839877	1.12e-16	-0.507936	2.91e-06	ChaC-like family protein
AT4G02600.2	0.725414	2.62e-13	0.482913	1.31e-05	-0.297936	0.0193975	Seven transmembrane MLO family protein
AT4G02600.1	0.730798	3.45e-14	0.492925	4.18e-06	-0.298583	0.0150225	Seven transmembrane MLO family protein
AT4G22780.1	0.911152	1.74e-11	0.203979	0.311261	-0.36645	0.0391042	ACT domain repeat 7
AT3G07650.2	1.42027	1.07e-19	0.170486	0.507031	-0.563441	0.0021452	CONSTANS-like 9
AT2G28650.1	1.02449	3.08e-05	0.230552	0.643271	-0.710407	0.0208401	exocyst subunit exo70 family protein H8
AT3G52900.1	1.04953	2.1e-18	0.55008	5.99e-05	-0.385877	0.00914955	Family of unknown function (DUF662)
AT1G68230.2	0.815024	8.66e-06	0.319705	0.242151	-0.656925	0.00222806	Reticulon family protein
AT5G37990.1	0.972305	0.0266501	0.528595	0.35465	-1.50775	0.00117533	S-adenosyl-L-methionine-dependent methyltransferases superfamily protein
AT1G22065.1	0.955243	9.71e-12	0.394045	0.0283119	-0.847663	1.68e-08	unknown protein
AT1G26665.1	0.817334	2.46e-11	0.607463	5.71e-06	-0.352814	0.0261821	Mediator complex, subunit Med10
AT1G67910.2	1.11717	0.00143847	0.501739	0.388708	-1.06702	0.0110381	unknown protein
AT3G07650.3	1.4284	3.15e-20	0.184848	0.458306	-0.554685	0.00244728	CONSTANS-like 9
AT5G62720.2	0.744984	5.84e-07	-0.492517	0.00346527	-0.750529	2.83e-06	Integral membrane HPP family protein
AT3G07650.4	1.40873	9.68e-20	0.164371	0.52664	-0.540566	0.00341024	CONSTANS-like 9
AT1G68230.1	0.706232	0.00175891	0.326327	0.358542	-0.614138	0.0267695	Reticulon family protein
AT5G62720.1	0.759558	1.59e-07	-0.487211	0.0029604	-0.748129	1.58e-06	Integral membrane HPP family protein
AT3G07650.1	1.41612	1.91e-20	0.177115	0.472081	-0.533147	0.00342884	CONSTANS-like 9
AT1G28660.2	1.07405	1.52e-05	0.661124	0.0456265	-0.773204	0.00913604	GDSL-like Lipase/Acylhydrolase superfamily protein
AT1G79760.1	0.842336	1.17e-06	0.705069	0.000913231	-0.626809	0.00192392	downstream target of AGL15-4
AT3G19400.2	0.992309	2.16e-29	0.383803	0.000181299	-0.311628	0.00321122	Cysteine proteinases superfamily protein
AT1G68238.1	1.23735	8.65e-08	-0.127855	0.840158	-0.904526	0.000602639	unknown protein
AT1G26665.2	0.820727	3.55e-11	0.608327	7.73e-06	-0.363123	0.0228236	Mediator complex, subunit Med10
AT1G23460.1	0.712892	1.73e-06	0.539682	0.00216817	-0.5147	0.00342406	Pectin lyase-like superfamily protein
AT1G27030.1	0.711747	7.32e-07	0.360447	0.0366414	-0.472858	0.00617612	unknown protein
AT4G32340.1	2.43617	2.06e-24	0.61231	0.0314142	-0.598252	0.0241893	Tetratricopeptide repeat (TPR)-like superfamily protein
AT4G08160.1	0.719746	2.22e-06	0.374674	0.0461182	-0.704929	2.09e-05	glycosyl hydrolase family 10 protein / carbohydrate-binding domain-containing protein
AT1G62422.1	0.827052	9.18e-06	0.293364	0.2581	-0.480677	0.0471632	unknown protein
AT3G19400.1	0.956901	5.7e-29	0.412266	2.72e-05	-0.288004	0.00722631	Cysteine proteinases superfamily protein
AT4G38530.1	0.830005	0.000132784	0.813141	0.00379633	-0.809668	0.00119922	phospholipase C1
AT4G37970.1	1.36448	8.63e-11	1.25802	1.76e-07	-0.594371	0.0220522	cinnamyl alcohol dehydrogenase 6
AT4G20880.1	0.846706	3.36e-13	0.350357	0.0158052	-0.512507	0.000107592	ethylene-responsive nuclear protein / ethylene-regulated nuclear protein (ERT2)
AT3G62290.1	0.740438	8.87e-11	0.588178	1.15e-06	-0.376422	0.00751881	ADP-ribosylation factor A1E
AT5G02600.2	0.856597	4.12e-08	0.244858	0.31404	-0.495177	0.00966447	Heavy metal transport/detoxification superfamily protein
AT1G14890.1	1.1044	3.06e-10	0.912763	1.91e-06	-0.459729	0.046378	Plant invertase/pectin methylesterase inhibitor superfamily protein
AT1G67910.1	1.24306	0.000212299	0.582553	0.25472	-1.0589	0.00752528	unknown protein
AT1G70885.1	0.854836	0.00861424	-0.112118	0.949267	-0.957135	0.0125063	pseudogene
AT1G49450.1	0.7811	0.000127343	0.363599	0.200046	-0.79344	0.000487753	Transducin/WD40 repeat-like superfamily protein
AT2G34510.1	1.22737	3.18e-08	0.315883	0.378289	-0.732445	0.00474819	Protein of unknown function, DUF642
AT3G49790.1	0.980047	2.46e-05	0.624918	0.0219766	-0.608812	0.0391687	Carbohydrate-binding protein
AT3G62290.3	0.748908	2.3e-11	0.591078	6.2e-07	-0.376037	0.00632811	ADP-ribosylation factor A1E
AT3G62290.2	0.748036	2.08e-11	0.58977	6.05e-07	-0.376816	0.0059836	ADP-ribosylation factor A1E
AT3G46530.1	0.977821	2.18e-08	-0.0484323	1	-0.460097	0.0442226	NB-ARC domain-containing disease resistance protein
AT1G69325.1	1.30522	6.33e-06	0.479562	0.273318	-0.852513	0.0135697	Remorin family protein
AT1G28330.1	0.728246	0.0118648	0.387303	0.300605	-0.819113	0.0131133	dormancy-associated protein-like 1
AT3G54000.1	0.95842	5.79e-10	0.641039	0.000705687	-0.521398	0.00495708	unknown protein
AT3G54000.2	0.97153	1.5e-09	0.652418	0.000890015	-0.541263	0.00503924	unknown protein
AT4G14740.1	0.797446	6.28e-13	0.289712	0.0414145	-0.409249	0.00187693	Plant protein of unknown function (DUF828) with plant pleckstrin homology-like region
AT5G51890.1	0.801525	1.15e-06	0.4715	0.01468	-0.639989	0.000655081	Peroxidase superfamily protein
AT1G51440.1	2.35909	3.11e-19	1.13513	0.0008534	-0.962871	0.000301716	alpha/beta-Hydrolases superfamily protein
AT5G51550.1	0.882115	4.58e-18	0.208137	0.126567	-0.29169	0.0298751	EXORDIUM like 3
AT5G53190.1	1.92357	0.000116411	0.915965	0.358394	-2.03361	0.000363542	Nodulin MtN3 family protein
AT1G78780.4	0.990129	2.18e-08	0.37076	0.108717	-0.551281	0.0114284	pathogenesis-related family protein
AT1G28330.5	0.747768	0.008695	0.360881	0.34089	-0.814872	0.0125158	dormancy-associated protein-like 1
AT1G78780.2	0.98562	2.8e-08	0.363794	0.113079	-0.544076	0.0130633	pathogenesis-related family protein
AT4G14740.2	0.810086	8.97e-13	0.266206	0.0734	-0.415447	0.00201808	Plant protein of unknown function (DUF828) with plant pleckstrin homology-like region
AT5G44410.1	0.937266	1.77e-11	0.466683	0.0147262	-1.05786	7.1e-13	FAD-binding Berberine family protein
AT1G78780.1	1.0201	7.62e-09	0.33945	0.14703	-0.568841	0.00823814	pathogenesis-related family protein
AT5G15210.1	1.56284	2.9e-14	0.543782	0.0436741	-0.634192	0.00834273	homeobox protein 30
AT4G35750.1	0.975453	4.38e-14	0.505446	0.000482797	-0.433752	0.00662882	SEC14 cytosolic factor family protein / phosphoglyceride transfer family protein
AT4G29720.1	0.718295	2.83e-12	0.109697	0.53696	-0.543819	1.45e-06	polyamine oxidase 5
AT5G19600.1	0.714515	0.00148701	0.356118	0.228284	-0.794614	0.00147015	sulfate transporter 3;5
AT3G47110.1	0.754524	0.00558923	0.75454	0.0504809	-0.698539	0.0402365	Leucine-rich repeat protein kinase family protein
AT3G54000.3	0.964402	5.54e-09	0.663823	0.00098064	-0.535592	0.00691669	unknown protein
AT4G14740.3	0.775278	1.07e-09	0.311057	0.0538381	-0.368034	0.022871	Plant protein of unknown function (DUF828) with plant pleckstrin homology-like region
AT1G09460.1	0.806589	1.42e-08	0.286524	0.130303	-0.433479	0.0140002	Carbohydrate-binding X8 domain superfamily protein
AT5G42200.1	0.756131	0.0404933	0.081855	1	-1.32993	0.00185986	RING/U-box superfamily protein
AT1G17970.1	0.820021	1.69e-08	0.318275	0.0937356	-0.398476	0.0348316	RING/U-box superfamily protein
AT3G50650.1	0.892074	1.64e-09	-0.0137034	1	-0.494412	0.00575843	GRAS family transcription factor
AT1G28330.3	0.751992	0.00770853	0.339869	0.373839	-0.822653	0.0106074	dormancy-associated protein-like 1
AT3G05160.1	0.753913	7.84e-10	0.136748	0.505198	-0.46782	0.00116815	Major facilitator superfamily protein
AT3G05160.2	0.747105	9.15e-10	0.139124	0.492127	-0.475757	0.000846511	Major facilitator superfamily protein
AT4G33550.2	0.999556	6.37e-05	-0.0387966	1	-0.635373	0.046519	Bifunctional inhibitor/lipid-transfer protein/seed storage 2S albumin superfamily protein
AT1G28330.2	0.763069	0.00685762	0.318458	0.418714	-0.834719	0.00930243	dormancy-associated protein-like 1
AT4G08685.1	0.988167	3.03e-16	0.437672	0.00211782	-0.385086	0.0104472	Pollen Ole e 1 allergen and extensin family protein
AT4G23060.1	1.09883	1.49e-09	0.489122	0.0412577	-0.494456	0.0307965	IQ-domain 22
AT5G02600.1	0.849283	6.89e-09	0.255547	0.254007	-0.536781	0.00187633	Heavy metal transport/detoxification superfamily protein
AT5G45110.1	0.93866	2.3e-10	0.363323	0.0491895	-0.428739	0.0237806	NPR1-like protein 3
AT1G28330.4	0.74607	0.0139085	0.354456	0.388715	-0.839184	0.0157459	dormancy-associated protein-like 1
AT1G78780.3	1.08284	2.7e-11	0.386779	0.0645099	-0.574891	0.00296488	pathogenesis-related family protein
AT2G15890.1	0.744919	0.00151171	0.122796	0.82021	-0.726786	0.00726877	maternal effect embryo arrest 14
AT1G32640.1	1.12652	1.87e-09	0.723128	0.000497633	-0.516675	0.0334921	Basic helix-loop-helix (bHLH) DNA-binding family protein
AT2G15890.2	0.721153	0.00181826	0.151596	0.74221	-0.705393	0.00833958	maternal effect embryo arrest 14
AT1G02335.1	0.747098	2.79e-09	0.271099	0.107335	-0.646493	2.45e-06	germin-like protein subfamily 2 member 2 precursor
AT1G30270.1	0.748722	2.76e-16	0.322138	0.00252361	-0.419258	6e-05	CBL-interacting protein kinase 23
AT4G27435.1	0.77481	2.86e-06	0.691014	0.000223657	-0.434327	0.0423054	Protein of unknown function (DUF1218)
AT5G65300.1	1.04204	0.000299188	-0.109441	1	-1.50694	2.08e-06	unknown protein
AT5G37540.1	0.8277	1.09e-05	0.530846	0.0161601	-0.493614	0.0405603	Eukaryotic aspartyl protease family protein
AT1G25230.1	0.790003	1.56e-06	0.683901	0.000177649	-0.656974	0.000417562	Calcineurin-like metallo-phosphoesterase superfamily protein
AT3G11650.1	0.990873	2.71e-09	-0.0523289	0.984906	-0.686189	0.00027757	NDR1/HIN1-like 2
AT1G43790.1	0.767248	7.14e-08	0.248304	0.213437	-0.672625	1.82e-05	tracheary element differentiation-related 6
AT2G04190.1	6.48989	8.34e-06	-0.952285	0.627801	-2.77407	0.011036	TRAF-like family protein
AT5G50290.1	0.849986	0.0104969	0.12741	0.963364	-0.920137	0.0224435	unknown protein
AT1G62500.1	1.20063	0.00018304	0.740477	0.0960738	-0.975513	0.0114935	Bifunctional inhibitor/lipid-transfer protein/seed storage 2S albumin superfamily protein
AT2G23030.1	0.905827	4.77e-08	-0.310288	0.149211	-0.447419	0.0385161	SNF1-related protein kinase 2.9
AT1G70470.1	1.16595	3.73e-20	0.497383	0.00082537	-0.35745	0.026152	unknown protein
AT2G25940.1	0.805992	4.21e-06	0.196149	0.50696	-0.552467	0.00897463	alpha-vacuolar processing enzyme
AT1G03010.1	0.754033	0.00363439	0.205047	0.755818	-0.869148	0.00460151	Phototropic-responsive NPH3 family protein
AT1G07440.2	3.09634	1.52e-17	1.66145	0.00056427	-0.961367	0.00509091	NAD(P)-binding Rossmann-fold superfamily protein
AT2G18196.1	0.715947	6.16e-07	0.312367	0.0931239	-0.404821	0.0274008	Heavy metal transport/detoxification superfamily protein
AT5G42440.1	0.731918	0.000195388	0.0907429	0.871153	-0.559933	0.0201571	Protein kinase superfamily protein
AT3G24110.1	0.816354	0.000250468	0.0493246	1	-0.755738	0.00347157	Calcium-binding EF-hand family protein
AT1G07440.1	3.03004	1.72e-18	1.74697	4.91e-05	-0.929698	0.00413506	NAD(P)-binding Rossmann-fold superfamily protein
AT2G35910.1	0.79921	7.53e-08	0.131103	0.645808	-0.476852	0.00854789	RING/U-box superfamily protein
AT4G19840.1	0.995608	1.74e-16	0.515548	0.000160745	-0.354882	0.0240325	phloem protein 2-A1
AT5G40020.1	1.43892	1.79e-21	0.752712	9.25e-06	-0.743766	8.68e-06	Pathogenesis-related thaumatin superfamily protein
AT4G12910.1	0.783297	3.05e-11	0.330964	0.0394822	-0.982066	1.69e-15	serine carboxypeptidase-like 20
AT1G63295.1	1.00256	1.25e-07	0.0738986	0.940323	-0.955389	4.05e-06	Remorin family protein
AT4G14103.1	0.752439	0.00022794	0.287913	0.41764	-0.625176	0.0111646	F-box/RNI-like superfamily protein
AT3G19030.1	1.32702	1.04e-17	0.623884	0.000410736	-0.595538	0.00105805	unknown protein
AT3G25130.1	1.11595	5.46e-13	0.384996	0.0518068	-0.588441	0.00109227	unknown protein
AT5G44060.1	0.886452	0.000181479	0.00857963	1	-0.848064	0.00166187	unknown protein
AT3G46620.1	0.701442	0.00539931	-0.145956	0.788124	-0.730932	0.0118441	zinc finger (C3HC4-type RING finger) family protein
AT1G69890.1	0.767484	0.000966662	-0.420515	0.160775	-1.10214	7.23e-06	Protein of unknown function (DUF569)
AT1G47960.1	1.38107	1.52e-14	0.607435	0.00636526	-0.606608	0.00417134	cell wall / vacuolar inhibitor of fructosidase 1
AT4G33810.1	1.11582	1.04e-07	0.710399	0.00670434	-0.669085	0.00778267	Glycosyl hydrolase superfamily protein
AT2G27830.1	0.944488	8.07e-07	0.0780562	0.909084	-0.911435	1.14e-05	unknown protein
AT5G59570.1	2.16245	1.97e-26	1.37866	8.28e-10	-0.605202	0.00968606	Homeodomain-like superfamily protein
AT1G70830.5	1.81906	2.43e-08	0.0665433	1	-1.69818	2.48e-06	MLP-like protein 28
AT3G52480.1	0.782849	2.35e-05	0.252557	0.357825	-0.496419	0.0350669	unknown protein
AT3G22830.1	1.81404	1.6e-06	-0.694326	0.232802	-1.87228	6.84e-06	heat shock transcription factor A6B
AT3G45970.1	1.47298	2.87e-12	0.641966	0.0108482	-0.546603	0.046793	expansin-like A1
AT3G56620.1	1.81714	8.87e-11	0.202118	0.75049	-1.0044	0.00156013	nodulin MtN21 /EamA-like transporter family protein
AT1G22370.2	1.74019	1.01e-07	0.753376	0.14753	-1.13009	0.00229399	UDP-glucosyl transferase 85A5
AT2G27690.1	1.7384	1.07e-06	0.0882148	1	-0.940588	0.0298972	cytochrome P450, family 94, subfamily C, polypeptide 1
AT1G60870.1	0.747583	4.78e-07	0.0437179	0.976661	-0.492589	0.00645114	maternal effect embryo arrest 9
AT5G07240.1	1.2451	6.7e-09	0.370407	0.23981	-0.558472	0.036911	IQ-domain 24
AT1G49750.1	0.766999	0.0054266	-0.0947242	1	-0.945394	0.00426824	Leucine-rich repeat (LRR) family protein
AT3G25790.1	1.29608	1.09e-10	0.220854	0.494974	-0.547359	0.0345108	myb-like transcription factor family protein
AT5G58500.1	1.01691	2.28e-06	-0.0683215	1	-0.629843	0.0180925	Protein of unknown function (DUF640)
AT3G61060.1	0.945738	0.000549814	0.288549	0.486185	-0.730927	0.0297287	phloem protein 2-A13
AT4G14103.2	0.901432	6.78e-08	0.341238	0.1655	-0.525098	0.00861704	F-box/RNI-like superfamily protein
AT2G35760.1	0.762172	0.000866132	0.413948	0.205357	-0.618276	0.0314905	Uncharacterised protein family (UPF0497)
AT1G11210.1	1.72767	1.89e-28	-0.127322	0.672512	-0.658846	0.000180337	Protein of unknown function (DUF761)
AT1G18740.1	0.899071	4.41e-08	0.268865	0.25129	-0.791859	1.13e-05	Protein of unknown function (DUF793)
AT3G61060.2	0.954948	0.000474131	0.270346	0.527221	-0.744623	0.0254862	phloem protein 2-A13
AT4G11211.1	0.881749	6.57e-06	0.5062	0.0563654	-1.15239	2.83e-08	unknown protein
AT2G48075.1	0.820341	0.0156869	0.180448	0.884501	-0.855794	0.0453657	unknown protein
AT3G04640.3	0.736686	0.00984802	-0.0151747	1	-0.789321	0.0187214	glycine-rich protein
AT4G26520.1	2.13351	3.22e-06	0.35096	0.831516	-1.18368	0.0221311	Aldolase superfamily protein
AT5G47070.1	0.80007	6.98e-05	-0.00842618	1	-0.795244	0.000614902	Protein kinase superfamily protein
AT2G15050.1	5.12632	0.0017477	-1.8371	0.478737	-3.09407	0.0449476	lipid transfer protein
AT1G67900.1	0.825519	1.81e-11	0.195379	0.279071	-0.550806	7.38e-05	Phototropic-responsive NPH3 family protein
AT1G27670.1	1.58711	6.12e-15	0.387191	0.174602	-0.757425	0.00104252	unknown protein
AT1G27200.1	0.952793	1e-14	0.328284	0.0381896	-0.479326	0.000885099	Domain of unknown function (DUF23)
AT1G67900.2	0.825103	5.69e-11	0.210926	0.250694	-0.556069	9.37e-05	Phototropic-responsive NPH3 family protein
AT1G67900.3	0.839524	3.59e-11	0.224636	0.216209	-0.536213	0.000234572	Phototropic-responsive NPH3 family protein
AT1G60610.3	0.913594	8.6e-08	0.468824	0.024395	-0.484927	0.0245541	SBP (S-ribonuclease binding protein) family protein
AT1G60610.2	0.91185	9.44e-08	0.475454	0.0214384	-0.481701	0.0256226	SBP (S-ribonuclease binding protein) family protein
AT3G32040.1	2.19912	7.03e-22	1.02877	4.28e-05	-0.631574	0.0259053	Terpenoid synthases superfamily protein
AT1G66020.1	2.17442	4.2e-30	1.09743	1e-06	-0.901293	4.41e-06	Terpenoid cyclases/Protein prenyltransferases superfamily protein
AT4G34560.1	0.812773	1.18e-08	0.552407	0.00201342	-0.709879	6.31e-06	unknown protein
AT2G42760.1	1.37119	6.6e-20	0.335635	0.104759	-0.99672	4.17e-10	unknown protein
AT1G60610.1	0.967171	2.61e-09	0.436116	0.0311072	-0.569454	0.00315915	SBP (S-ribonuclease binding protein) family protein
AT5G11420.1	0.924078	2.05e-07	0.515087	0.0247757	-0.716102	0.00040329	Protein of unknown function, DUF642
AT2G36220.1	0.785945	1.38e-07	-0.0927315	0.790431	-0.503636	0.00502886	unknown protein
AT5G03680.1	0.760269	9.93e-05	-0.213501	0.543514	-1.12484	8.3e-08	Duplicated homeodomain-like superfamily protein
AT1G70830.3	1.95871	6.71e-10	0.024035	1	-1.83778	1.18e-07	MLP-like protein 28
AT1G70740.2	0.87022	2.02e-12	0.184872	0.317825	-0.363408	0.0194929	Protein kinase superfamily protein
AT2G38790.1	1.71908	1.19e-08	0.610106	0.124717	-0.907439	0.011981	unknown protein
AT2G40140.1	0.753861	0.0173077	-0.154361	0.828943	-0.763044	0.044822	zinc finger (CCCH-type) family protein
AT1G51700.1	1.18558	3.41e-08	0.359965	0.241102	-0.556316	0.0414991	DOF zinc finger protein 1
AT1G22370.1	1.72478	2.93e-06	0.645038	0.292617	-0.984198	0.0241893	UDP-glucosyl transferase 85A5
AT2G40140.2	0.760725	0.0162544	-0.149415	0.840114	-0.759504	0.0463279	zinc finger (CCCH-type) family protein
AT2G47010.2	0.763093	0.000185809	-0.398523	0.120859	-0.612797	0.0127608	unknown protein
AT1G73040.1	2.77934	1.7e-10	2.50505	3.78e-06	-1.07747	0.0341881	Mannose-binding lectin superfamily protein
AT4G25620.1	1.01771	2.03e-13	0.0832047	0.802958	-0.453186	0.00784788	hydroxyproline-rich glycoprotein family protein
AT1G70740.1	0.862466	1.27e-12	0.223332	0.18399	-0.358351	0.0201232	Protein kinase superfamily protein
AT1G58340.1	1.57828	8.9e-18	1.05645	7.63e-07	-0.978356	9.73e-07	MATE efflux family protein
AT5G03310.1	2.01006	1.28e-06	0.75343	0.303665	-1.22678	0.00966447	SAUR-like auxin-responsive protein family
AT2G47010.1	0.769634	0.000218258	-0.410076	0.112846	-0.629038	0.011978	unknown protein
AT5G51780.1	0.941742	4.63e-20	0.660216	3.24e-09	-0.345177	0.00718032	basic helix-loop-helix (bHLH) DNA-binding superfamily protein
AT5G64660.1	1.16928	2.39e-07	-0.0206097	1	-0.641601	0.0233181	CYS, MET, PRO, and GLY protein 2
AT2G01300.1	1.75628	0.000251053	0.507734	0.704551	-1.58386	0.0044155	unknown protein
AT5G64550.1	1.35664	3.39e-12	0.619653	0.0161763	-1.0316	1.05e-06	loricrin-related
AT5G64552.1	1.35664	3.39e-12	0.619653	0.0161763	-1.0316	1.05e-06	conserved peptide upstream open reading frame 22
AT5G17850.1	0.944284	1.63e-05	0.463523	0.148004	-0.912896	0.000252387	Sodium/calcium exchanger family protein
AT2G24270.3	0.801265	0.0151958	0.104981	0.979355	-1.23524	0.00062882	aldehyde dehydrogenase 11A3
AT3G59080.1	1.63856	7.05e-17	0.313226	0.266044	-0.624809	0.00710541	Eukaryotic aspartyl protease family protein
AT2G24270.2	0.791209	0.0160885	0.0814123	1	-1.25233	0.000472107	aldehyde dehydrogenase 11A3
AT2G24270.4	0.83096	0.00861157	0.0910917	0.991716	-1.21836	0.000460415	aldehyde dehydrogenase 11A3
AT5G22020.1	0.924178	6.92e-17	0.656099	4.03e-08	-0.40654	0.00242888	Calcium-dependent phosphotriesterase superfamily protein
AT5G14545.1	1.55071	0.0424159	-1.32936	0.376385	-2.43636	0.0287128	MIR398B; miRNA
AT2G33810.1	0.904192	0.0283435	2.03986	0.00499866	-1.21541	0.0194465	squamosa promoter binding protein-like 3
AT3G15530.2	1.09496	7.91e-13	0.0891742	0.811731	-0.536606	0.00343545	S-adenosyl-L-methionine-dependent methyltransferases superfamily protein
AT3G59080.2	1.60832	1.21e-14	0.285112	0.366962	-0.67985	0.00546593	Eukaryotic aspartyl protease family protein
AT3G15530.1	1.10744	2.49e-14	0.107052	0.729137	-0.512745	0.00353149	S-adenosyl-L-methionine-dependent methyltransferases superfamily protein
AT2G24270.1	0.813105	0.0232781	0.0547653	1	-1.28203	0.00094757	aldehyde dehydrogenase 11A3
AT2G22500.1	0.925494	5.87e-06	0.124497	0.790431	-0.687023	0.00422863	uncoupling protein 5
AT4G13290.1	1.02696	0.00841082	-0.0816487	1	-1.16479	0.00832468	cytochrome P450, family 71, subfamily A, polypeptide 19
AT2G41640.2	1.29163	1.85e-12	0.412092	0.106296	-1.33799	4.08e-12	Glycosyltransferase family 61 protein
AT1G13430.1	1.56119	1.07e-11	0.77357	0.00823935	-0.715701	0.00887287	sulfotransferase 4C
AT4G21326.1	1.74245	5.86e-19	1.01759	6.11e-05	-0.92087	8.16e-06	subtilase 3.12
AT4G17030.1	0.770101	6.61e-05	0.505364	0.0317888	-0.537066	0.0257457	expansin-like B1
AT5G10695.2	0.985549	1.19e-05	0.179877	0.761949	-0.817398	0.0019279	unknown protein
AT1G31920.1	0.961315	0.0239933	-0.177607	0.986511	-1.26121	0.0210573	Tetratricopeptide repeat (TPR)-like superfamily protein
AT3G56700.1	2.25898	0.00363916	-0.299796	1	-2.02354	0.0298972	fatty acid reductase 6
AT4G19160.2	0.783247	2.03e-05	0.104426	0.804732	-0.859203	1.27e-05	unknown protein
AT5G10210.1	1.56	4.43e-08	0.391595	0.380494	-1.1369	0.000420527	unknown protein
AT4G19160.1	0.779263	2.79e-05	0.0954994	0.838105	-0.864756	1.38e-05	unknown protein
AT3G52720.1	1.42191	0.000144427	1.08991	0.0989533	-1.07769	0.0150457	alpha carbonic anhydrase 1
AT3G56880.1	1.22192	6.16e-09	0.21726	0.528733	-0.565009	0.037341	VQ motif-containing protein
AT5G45960.1	2.50092	7.61e-06	0.813409	0.962515	-2.89576	1.45e-05	GDSL-like Lipase/Acylhydrolase superfamily protein
AT4G19160.3	0.803481	1.05e-05	0.0837189	0.875869	-0.866716	9.13e-06	unknown protein
AT3G62720.1	1.00447	2.83e-10	0.147624	0.61348	-0.565783	0.0028947	xylosyltransferase 1
AT3G47050.2	1.23546	3.34e-12	0.593188	0.0117843	-0.6071	0.00337958	Glycosyl hydrolase family protein
AT2G41640.1	1.21712	3.01e-08	0.279929	0.432599	-1.16048	1.01e-06	Glycosyltransferase family 61 protein
AT3G52720.2	1.31925	0.00128693	1.46679	0.126054	-1.47749	0.00356518	alpha carbonic anhydrase 1
AT5G10180.1	2.35673	6e-27	0.400099	0.161844	-0.662713	0.0143311	slufate transporter 2;1
AT3G47050.1	1.26964	9.8e-14	0.609942	0.00636226	-0.601841	0.00235454	Glycosyl hydrolase family protein
AT4G18280.1	0.808155	0.000254799	0.88558	0.00153504	-0.643709	0.0179986	glycine-rich cell wall protein-related
AT2G18210.1	1.95175	1.86e-41	0.480477	0.00409383	-0.539844	0.000741659	unknown protein
AT2G33580.1	1.44996	1.37e-10	0.362473	0.264154	-0.711981	0.00900493	Protein kinase superfamily protein
AT4G38470.1	0.900837	8.22e-08	0.0204278	1	-0.615148	0.00170161	ACT-like protein tyrosine kinase family protein
AT3G25620.1	1.51146	1.06e-05	0.6218	0.268151	-0.837753	0.047604	ABC-2 type transporter family protein
AT4G27460.1	1.66833	8.84e-06	-0.271241	0.756936	-1.2716	0.00354333	Cystathionine beta-synthase (CBS) family protein
AT3G18690.1	0.835186	4.79e-06	0.259627	0.3602	-0.592816	0.00688436	MAP kinase substrate 1
AT3G62720.2	1.03623	1.53e-10	0.12989	0.689245	-0.589343	0.00201083	xylosyltransferase 1
AT1G64065.1	1.73029	4.93e-05	0.29939	0.808137	-1.23829	0.0155182	Late embryogenesis abundant (LEA) hydroxyproline-rich glycoprotein family
AT1G19540.1	1.55382	1.65e-05	1.26835	0.0581025	-2.16608	9.29e-08	NmrA-like negative transcriptional regulator family protein
AT4G33985.1	1.60314	1.95e-18	0.412107	0.0820316	-0.623921	0.0030839	Protein of unknown function (DUF1685)
AT5G59270.1	0.707017	0.0162633	0.464904	0.365737	-0.907683	0.00829988	Concanavalin A-like lectin protein kinase family protein
AT3G25620.2	1.4258	2.35e-05	0.518506	0.407021	-0.941885	0.0252145	ABC-2 type transporter family protein
AT2G15050.2	5.34294	0.000528671	-1.8372	0.478517	-3.31017	0.0176717	lipid transfer protein
AT5G44680.1	0.821209	0.00636378	0.730793	0.167904	-1.14094	0.000801145	DNA glycosylase superfamily protein
AT2G30790.1	1.07135	0.0483888	1.35107	0.286809	-1.46938	0.0246518	photosystem II subunit P-2
AT4G33980.1	2.15329	6.09e-19	-0.0750029	0.972914	-0.996704	0.000209515	unknown protein
AT5G10695.1	1.12095	2.97e-08	0.192176	0.638707	-0.990606	9.5e-06	unknown protein
AT1G79320.1	0.917573	0.000224225	0.1069	0.902957	-0.782899	0.00810478	metacaspase 6
AT4G03210.2	1.31157	8.34e-21	-0.511947	0.0022089	-1.13867	7.16e-15	xyloglucan endotransglucosylase/hydrolase 9
AT1G19770.1	1.40013	1.1e-09	0.343043	0.288576	-0.833217	0.00200768	purine permease 14
AT4G03210.1	1.2973	3.84e-22	-0.499473	0.00166714	-1.10355	2.84e-15	xyloglucan endotransglucosylase/hydrolase 9
AT5G38980.1	1.47874	0.0176354	-1.73997	0.0248628	-1.85754	0.0173386	unknown protein
AT2G22890.1	1.21016	4.82e-05	-0.516883	0.181087	-0.743265	0.0458347	Kua-ubiquitin conjugating enzyme hybrid localisation domain
AT2G18680.1	1.79065	0.00155355	0.247622	0.963033	-1.3424	0.0452509	unknown protein
AT1G10340.1	1.16125	8.69e-05	0.377522	0.384797	-0.760172	0.0415903	Ankyrin repeat family protein
AT1G18100.1	1.1952	2.52e-07	0.169304	0.73335	-0.758534	0.00639416	PEBP (phosphatidylethanolamine-binding protein) family protein
AT1G69870.1	1.19551	0.000210787	-0.475728	0.267997	-0.824808	0.0411922	nitrate transporter 1.7
AT2G16980.1	0.812206	2.09e-07	0.74939	1.25e-05	-0.453947	0.0206363	Major facilitator superfamily protein
AT2G16980.2	0.836054	3.68e-08	0.749361	7.17e-06	-0.461737	0.0143572	Major facilitator superfamily protein
AT4G33980.2	1.98321	2.72e-15	0.0277887	1	-0.8717	0.00249431	unknown protein
AT4G11880.1	1.05426	3.69e-06	0.866974	0.00289788	-1.3751	1.34e-08	AGAMOUS-like 14
AT1G51400.1	1.11467	3.53e-09	0.411813	0.0928089	-0.550879	0.0205691	Photosystem II 5 kD protein
AT1G51402.1	1.20703	2.99e-09	0.505302	0.0519507	-0.524578	0.0463615	unknown protein
AT2G18300.3	1.22661	0.00143621	0.343001	0.838105	-1.34005	0.00356518	basic helix-loop-helix (bHLH) DNA-binding superfamily protein
AT5G59550.1	1.34828	2.99e-11	0.337812	0.230268	-0.9296	3.53e-05	zinc finger (C3HC4-type RING finger) family protein
AT2G35710.3	1.12001	1.21e-07	-0.282771	0.376044	-0.562172	0.0355612	Nucleotide-diphospho-sugar transferases superfamily protein
AT5G37770.1	1.39936	1.28e-15	0.0112998	1	-0.651737	0.00142806	EF hand calcium-binding protein family
AT5G23060.1	1.16793	1.44e-10	0.155766	0.722346	-0.821557	5.21e-05	calcium sensing receptor
AT1G32920.1	1.70036	2.18e-16	0.0128935	1	-0.848357	0.000273884	unknown protein
AT2G18300.2	1.19706	0.000651779	0.263709	0.85935	-1.39531	0.000960455	basic helix-loop-helix (bHLH) DNA-binding superfamily protein
AT2G42610.2	1.74012	9.69e-11	0.859851	0.0724041	-1.63932	1.68e-08	Protein of unknown function (DUF640)
AT4G32980.1	2.67599	0.00424816	0.64357	1	-2.43802	0.0202076	homeobox gene 1
AT2G30020.1	1.566	3.39e-12	0.174898	0.706185	-1.18672	1.08e-06	Protein phosphatase 2C family protein
AT2G42610.1	1.72555	3.74e-11	0.67493	0.183617	-1.70871	2.28e-09	Protein of unknown function (DUF640)
AT4G27440.2	1.11534	3.25e-10	0.11917	0.763277	-0.624236	0.00315915	protochlorophyllide oxidoreductase B
AT1G77760.1	2.33422	3.31e-21	0.232866	0.579234	-0.947862	0.000925304	nitrate reductase 1
AT5G61600.1	1.9598	1.19e-05	0.504655	0.442552	-1.41489	0.00713512	ethylene response factor 104
AT1G66500.1	1.78195	9.2e-09	0.130657	0.909303	-1.32726	0.000105377	Pre-mRNA cleavage complex II
AT4G27440.1	1.1161	6.37e-12	0.145712	0.624452	-0.642325	0.000656062	protochlorophyllide oxidoreductase B
AT4G27657.1	1.53087	0.00938727	-1.29729	0.24801	-2.9678	3.86e-05	unknown protein
AT2G18300.1	1.10044	0.00218408	0.277465	0.91742	-1.46625	0.000694101	basic helix-loop-helix (bHLH) DNA-binding superfamily protein
AT5G47230.1	1.52356	2.26e-05	0.0644032	1	-1.15063	0.00645114	ethylene responsive element binding factor 5
AT1G08430.1	2.23624	3.91e-17	0.458501	0.192491	-0.911198	0.00363273	aluminum-activated malate transporter 1
AT4G28750.1	1.289	5.8e-11	0.134924	0.756317	-0.588629	0.0148184	Photosystem I reaction centre subunit IV / PsaE protein
AT4G30270.1	2.28494	3.68e-19	0.673361	0.0263351	-0.853014	0.00562132	xyloglucan endotransglucosylase/hydrolase 24
AT1G62262.1	3.5888	5.25e-24	1.14363	0.00451058	-1.2654	0.000230594	SLAC1 homologue 4
AT1G15640.1	1.11368	1.18e-05	0.0867408	0.961566	-0.815546	0.00719768	unknown protein
AT1G52230.1	0.74285	0.00435358	-0.181759	0.79594	-0.764265	0.0150457	photosystem I subunit H2
AT5G64905.1	1.51848	7.71e-08	0.472514	0.271174	-0.748738	0.0324877	elicitor peptide 3 precursor
AT4G21650.1	2.31977	3.7e-15	0.619706	0.515938	-2.70053	4.64e-16	Subtilase family protein
AT1G66180.1	1.55895	9.81e-19	0.211286	0.448295	-0.922819	1.94e-06	Eukaryotic aspartyl protease family protein
AT4G13280.1	1.65291	0.000436952	-0.510573	0.47099	-2.04731	5.63e-05	terpenoid synthase 12
AT2G41010.1	1.13492	1.8e-09	0.119145	0.784074	-0.549537	0.0201232	calmodulin (CAM)-binding protein of 25 kDa
AT1G66970.2	3.27173	8.84e-13	0.195508	0.900078	-0.905019	0.0398736	SHV3-like 2
AT1G73500.1	1.39177	1.1e-07	0.0206636	1	-1.08298	0.000234572	MAP kinase kinase 9
AT1G66970.1	3.29136	5.03e-13	0.155173	0.964683	-0.924625	0.0327366	SHV3-like 2
AT5G66650.1	1.58214	5.84e-06	0.131365	0.921597	-0.910213	0.0389943	Protein of unknown function (DUF607)
AT1G29920.1	0.953792	0.000207324	-0.275771	0.48271	-0.763482	0.0129301	chlorophyll A/B-binding protein 2
AT1G29930.1	0.88435	0.000958549	-0.488336	0.135091	-0.957297	0.00127793	chlorophyll A/B binding protein 1
AT1G62540.1	1.48528	1.04e-11	0.401535	0.176633	-0.741215	0.00410926	flavin-monooxygenase glucosinolate S-oxygenase 2
AT3G23290.2	2.54923	8.24e-15	-0.476694	0.656286	-3.25213	4.56e-18	Protein of unknown function (DUF640)
AT3G56400.1	1.27248	0.00344036	1.41535	0.00518461	-1.24688	0.0141507	WRKY DNA-binding protein 70
AT4G31620.1	2.33695	0.003035	1.93347	1	-4.07062	0.000246769	Transcriptional factor B3 family protein
AT3G61970.1	1.5428	6.93e-05	0.495951	0.681219	-1.85278	3.22e-05	AP2/B3-like transcriptional factor family protein
AT3G13840.1	2.65357	3.19e-18	0.0446417	1	-1.24395	8.97e-05	GRAS family transcription factor
AT5G28610.1	2.75213	8.53e-11	-0.178823	0.934774	-1.51061	0.000897211	unknown protein
AT5G17860.1	1.49027	4.95e-05	0.0828388	1	-0.922903	0.0346735	calcium exchanger 7
AT5G11070.1	1.8908	1.35e-16	0.10467	0.933754	-1.49547	5.4e-10	unknown protein
AT2G39850.1	5.52973	0.000177725	0	1	-5.40441	0.00128105	Subtilisin-like serine endopeptidase family protein
AT1G32928.1	1.3052	2.55e-05	-0.119946	0.937242	-1.10669	0.00190105	unknown protein
AT3G61190.2	2.08251	4.94e-10	0.543205	0.239638	-0.947489	0.0204817	BON association protein 1
AT3G61190.1	2.07224	4.31e-10	0.503492	0.274943	-0.965149	0.0163917	BON association protein 1
AT1G51340.2	1.66227	2.2e-14	0.251896	0.501139	-0.983952	4.28e-05	MATE efflux family protein
AT4G17490.1	2.09178	1.08e-07	0.473717	0.407021	-1.08505	0.0261669	ethylene responsive element binding factor 6
AT1G61470.1	2.75528	4.06e-05	1.52855	0.359469	-1.67309	0.0268019	Polynucleotidyl transferase, ribonuclease H-like superfamily protein
AT1G51340.1	1.66531	8.37e-14	0.244529	0.526376	-1.01257	3.59e-05	MATE efflux family protein
AT5G22250.1	2.38441	3.92e-26	0.937078	0.000354782	-1.15532	9.7e-07	Polynucleotidyl transferase, ribonuclease H-like superfamily protein
AT4G11280.1	1.61047	4.72e-05	-0.0189033	1	-1.54137	0.000460415	1-aminocyclopropane-1-carboxylic acid (acc) synthase 6
AT3G50060.1	2.60495	3.72e-08	0.625603	0.358143	-1.30615	0.0216867	myb domain protein 77
AT5G43620.1	2.12604	2.07e-09	0.401457	0.535608	-1.44848	0.000182028	Pre-mRNA cleavage complex II
AT1G58420.1	1.85636	0.000105333	-0.182322	0.965318	-1.23413	0.028501	Uncharacterised conserved protein UCP031279
AT3G10930.1	2.82087	4.19e-15	0.418316	0.445801	-1.27457	0.00131673	unknown protein
AT2G40000.1	1.9009	5.51e-07	0.65942	0.174639	-1.42351	0.000946609	ortholog of sugar beet HS1 PRO-1 2
AT5G07580.1	1.53171	1.46e-12	0.101926	0.874849	-0.761185	0.00300937	Integrase-type DNA-binding superfamily protein
AT5G59720.1	1.50452	4.93e-09	0.311114	0.492242	-1.57539	1.07e-08	heat shock protein 18.2
AT5G63160.1	2.29506	4.02e-15	0.733716	0.0359443	-1.27207	8.21e-05	BTB and TAZ domain protein 1
AT5G58680.1	3.28737	1.22e-06	-0.413282	0.913199	-2.47717	0.000582765	ARM repeat superfamily protein
AT5G52050.1	3.16099	4.9e-05	0.212681	1	-2.27408	0.00851019	MATE efflux family protein
AT1G72920.1	2.57692	6.79e-11	0.0496644	1	-0.990286	0.0298478	Toll-Interleukin-Resistance (TIR) domain family protein
AT4G27652.1	1.98856	1.21e-10	-0.265001	0.657814	-1.58202	1.88e-06	unknown protein
AT3G55980.1	2.55094	9.22e-11	0.814316	0.0898443	-1.51649	0.000597907	salt-inducible zinc finger 1
AT5G24920.1	1.02211	0.00522316	1.29078	0.0846131	-1.96438	3.09e-06	glutamine dumper 5
AT2G26530.1	2.35573	3.17e-20	1.04007	0.000282978	-0.928194	0.00140684	Protein of unknown function (DUF1645)
AT3G45960.2	2.70074	1.02e-10	0.0847783	1	-1.52775	0.000931544	expansin-like A3
AT2G26530.2	2.37188	3.06e-19	1.05842	0.000357643	-0.956179	0.00150787	Protein of unknown function (DUF1645)
AT3G45960.1	2.77352	3.38e-11	0.0965108	1	-1.57892	0.000573389	expansin-like A3
AT5G57510.1	1.87594	0.0138539	-0.988095	0.66916	-2.95038	0.0038107	unknown protein
AT5G07570.1	3.01852	1.99e-17	0.267401	0.797498	-1.91149	5.24e-08	glycine/proline-rich protein
AT4G37800.1	1.68924	7.54e-30	-0.946111	1.44e-06	-2.86071	4.21e-69	xyloglucan endotransglucosylase/hydrolase 7
AT1G73540.1	2.38475	1.47e-11	0.193249	0.846279	-2.14853	9e-09	nudix hydrolase homolog 21
AT1G64710.2	2.94564	0.000487529	-0.0634603	1	-1.78918	0.0357619	GroES-like zinc-binding dehydrogenase family protein
AT4G27280.1	3.38985	1.26e-10	0.651918	0.366446	-1.86938	0.00136194	Calcium-binding EF-hand family protein
AT4G13395.1	4.25554	8.12e-08	-0.338115	1	-3.26262	2.6e-05	ROTUNDIFOLIA like 12
AT1G61340.1	2.44372	5.92e-08	0.499005	0.470007	-1.41796	0.00647736	F-box family protein
AT4G25490.1	4.03314	0.00049124	-1.81842	1	-7.00264	6.1e-05	C-repeat/DRE binding factor 1
AT4G25470.1	2.08057	4.41e-05	-1.25759	0.241558	-3.67953	7.02e-09	C-repeat/DRE binding factor 2
AT1G28370.1	3.06355	1.46e-14	0.75666	0.135859	-1.04629	0.021416	ERF domain protein 11
AT1G61340.2	2.37156	9.11e-08	0.522924	0.451719	-1.45064	0.00426065	F-box family protein
AT5G17350.1	3.45264	6.8e-19	0.996109	0.0494729	-2.26379	6.76e-09	unknown protein
AT1G15010.1	4.29236	4.98e-13	0.369886	0.866257	-2.30367	3.29e-05	unknown protein
AT1G19960.1	2.7673	2.27e-22	0.714645	0.0337046	-1.14659	0.000273825	unknown protein
AT5G21960.1	6.38218	0.00182396	0	1	-6.25558	0.00896494	Integrase-type DNA-binding superfamily protein
AT4G34410.1	2.86894	2.07e-08	0.330599	0.788528	-2.53103	3.4e-06	redox responsive transcription factor 1
AT3G29000.1	4.15605	3.79e-12	-0.00221112	1	-1.37152	0.0490977	Calcium-binding EF-hand family protein
AT4G13420.1	5.6557	2.13e-11	-0.2518	0.962731	-3.23399	8.3e-05	high affinity K+ transporter 5
AT1G18300.1	3.2886	3.6e-21	0.514941	0.307215	-2.2287	2.91e-10	nudix hydrolase homolog 4
AT5G64870.1	3.97618	1.67e-08	1.13166	0.326961	-2.60813	0.000344943	SPFH/Band 7/PHB domain-containing membrane-associated protein family
AT1G76650.2	2.9678	1.18e-08	-0.607203	0.493252	-2.41693	1.27e-05	calmodulin-like 38
AT5G57560.1	3.67786	1.27e-10	0.219933	0.901503	-1.56067	0.0175943	Xyloglucan endotransglucosylase/hydrolase family protein
AT1G19210.1	5.14002	7.21e-05	1.07932	0.804223	-3.08614	0.0169284	Integrase-type DNA-binding superfamily protein
AT1G76650.3	2.70128	1.73e-07	-0.659494	0.421545	-2.42071	1.55e-05	calmodulin-like 38
AT1G76650.1	2.78528	4.73e-08	-0.604573	0.454225	-2.37534	1.5e-05	calmodulin-like 38
AT4G27654.1	4.4311	1.59e-08	0.265009	0.988008	-3.32267	4.76e-05	unknown protein
AT1G35210.1	5.07188	1.32e-11	0.514045	0.796007	-2.70004	0.000130319	unknown protein
AT5G42380.1	4.3752	1.43e-06	2.43926	0.0561716	-2.80822	0.00426824	calmodulin like 37
AT1G12610.1	7.21797	0.000187964	0	1	-7.09066	0.00104311	Integrase-type DNA-binding superfamily protein
AT1G80840.1	3.70966	5.4e-08	1.16471	0.189417	-2.13035	0.00444503	WRKY DNA-binding protein 40
AT1G27730.1	4.06814	4.6e-17	0.324016	0.715473	-1.98028	9.04e-05	salt tolerance zinc finger
AT1G74930.1	3.98665	1e-10	-0.112752	1	-3.80821	4.52e-09	Integrase-type DNA-binding superfamily protein
AT1G07135.1	5.16367	4.45e-15	0.613767	0.522273	-2.58178	5.19e-05	glycine-rich protein
AT4G24570.1	4.2937	4.47e-19	0.292872	0.770972	-2.91742	1.44e-09	dicarboxylate carrier 2
AT3G02840.1	5.07053	6.95e-10	-0.151841	1	-3.05174	0.000188173	ARM repeat superfamily protein
AT5G51190.1	5.11652	5.44e-17	0.708092	0.377778	-2.72965	4.04e-06	Integrase-type DNA-binding superfamily protein
AT2G44840.1	6.19235	2.43e-08	1.01508	0.537767	-3.22529	0.00201083	ethylene-responsive element binding factor 13
AT3G44260.1	5.89685	3.09e-26	0.8156	0.209257	-2.84914	2.12e-08	Polynucleotidyl transferase, ribonuclease H-like superfamily protein

## Sheet: All data (normalized PPM)
Dataset S1. Significantly differentially expressed genes between Col-0 and ksc1/2/20 grown at 22˚C
Reference ID	Col-0-Root 22˚C rep1	Col-0-Root 22˚C rep2	Col-0-Root 22˚C rep3	Col-0-Root 28˚C rep1	Col-0-Root 28˚C rep2	Col-0-Root 28˚C rep3	kcs1/2/20-Root 22˚C rep1	kcs1/2/20-Root 22˚C rep2	kcs1/2/20-Root 22˚C rep3	kcs1/2/20-Root 28˚C rep1	kcs1/2/20-Root 28˚C rep2	kcs1/2/20-Root 28˚C rep3	logconc_Col-0-Root 22˚C vs 28˚C	logFC Col-0-Root 22˚C vs 28˚C	adj-pvalue Col-0-Root 22˚C vs 28˚C	logconc kcs1/2/20-Root 22˚C vs 28˚C	logFC kcs1/2/20-Root 22˚C vs 28˚C	adj-pvalue kcs1/2/20-Root 22˚C vs 28˚C	logconc Col-0-root 22˚C vs kcs1/2/20-root 22˚C	logFC Col-0-root 22˚C vs kcs1/2/20-root 22˚C	adj-pvalue Col-0-root 22˚C vs kcs1/2/20-root 22˚C	logconc Col-0-root 28˚C vs kcs1/2/20-root 28˚C	logFC Col-0-root 28˚C vs kcs1/2/20-root 28˚C	adj-pvalue Col-0-root 28˚C vs kcs1/2/20-root 28˚C	annotation
ATCG01000.1	0.300536	0.0742178	0.385679	0.795175	1.61593	1.10393	0.156052	0.169022	0.0799191	1.58712	0.672169	1.1177	4.71	2.15762	5.73e-05	4.71	2.95013	3.57e-06	4.71	-0.857159	0.672865	4.71	-0.0578352	1	Ycf1 protein
AT5G03710.1	0	2.5234	2.77689	0	0	0	2.80893	2.87337	0	0	0	0	0.166622	-7.47733	8.65e-05	0.166622	-7.4838	0.000171429	0.166622	0.099598	1	0.166622	0	1	unknown protein
AT4G06597.1	0	2.30075	2.54548	0	0	0	2.57485	2.61984	0	0	0	0	0.0581298	-7.34884	0.000120884	0.0581298	-7.35507	0.000256554	0.0581298	0.0993153	1	0.0581298	0	1	pseudogene
AT1G73120.1	15.5528	17.0701	28.0774	0.238552	0	0.339669	9.3631	3.54946	1.43854	1.4004	0.0840211	0.372567	5.32076	-6.62103	4.78e-15	5.32076	-2.94703	0.000290323	5.32076	-2.07697	0.00781491	5.32076	1.59144	0.345123	unknown protein
AT5G36130.1	6.16099	6.6796	8.17639	0.31807	0.269322	0.509504	3.74524	4.05652	3.83612	0.466799	1.09227	0.745135	2.45867	-4.21965	2.83e-41	2.45867	-2.30007	8.01e-13	2.45867	-0.850976	0.000230074	2.45867	1.06581	0.227858	Cytochrome P450 superfamily protein
AT5G36140.1	12.322	14.8436	17.5098	1.03373	0.897739	1.44359	8.11469	6.84539	8.71118	1.12032	1.5964	0.465709	3.25992	-3.71234	1.37e-38	3.25992	-2.86458	2.68e-20	3.25992	-0.913993	0.000490798	3.25992	-0.0669261	1	cytochrome P450, family 716, subfamily A, polypeptide 2
AT1G08090.1	20.1359	26.8668	28.0003	0.31807	0.538644	1.61343	7.02232	7.35245	3.83612	1.21368	0.924232	0.931418	3.54672	-4.91304	7.51e-26	3.54672	-2.5584	1.51e-07	3.54672	-2.0409	1.59e-06	3.54672	0.312679	0.929844	nitrate transporter 2:1
AT5G36150.1	2.40429	2.0781	2.69975	0.159035	0	0.424587	1.32644	1.35217	1.35862	0.0933599	0.252063	0.465709	0.5579	-3.53642	6.28e-12	0.5579	-2.27321	0.000189828	0.5579	-0.825508	0.0956132	0.5579	0.433398	1	putative pentacyclic triterpene synthase 3
AT1G01580.1	39.7459	24.4919	112.927	8.98548	2.33412	3.99111	85.6724	32.7902	11.0288	12.1368	4.70518	6.05422	7.00661	-3.52718	3.6e-07	7.00661	-2.49914	0.000582085	7.00661	-0.451913	0.79136	7.00661	0.575939	0.718481	ferric reduction oxidase 2
AT3G12900.1	4.80858	0.593742	12.6503	0	0	0	1.17039	0.507066	0.159838	0.18672	0.0840211	0.372567	2.66028	-9.23957	3e-07	2.66028	-1.4839	0.470636	2.66028	-3.27286	0.016591	2.66028	4.35827	0.274535	2-oxoglutarate (2OG) and Fe(II)-dependent oxygenase superfamily protein
ATMG00370.1	0.450804	0.148436	0.385679	2.06745	3.23186	2.54752	0.312103	0.591577	0.159838	2.70744	1.68042	2.14226	3.41465	2.95244	6.84e-13	3.41465	2.59154	1.22e-08	3.41465	0.0951133	1	3.41465	-0.2635	0.756469	Ycf1 protein
AT1G18330.2	53.5706	45.5697	37.8737	8.98548	6.46372	8.15206	22.7055	20.8742	23.4163	10.643	10.1665	12.2947	4.80961	-2.53132	5.24e-63	4.80961	-1.01866	4.43e-10	4.80961	-1.03164	5.44e-13	4.80961	0.480942	0.0404972	Homeodomain-like superfamily protein
AT1G18330.1	56.05	47.1283	39.7249	9.30355	6.73304	8.74648	23.5638	21.7193	24.9348	11.2032	10.5026	12.9467	4.87346	-2.52198	4e-61	4.87346	-1.02066	6.35e-10	4.87346	-1.02458	1.65e-12	4.87346	0.476654	0.0446129	Homeodomain-like superfamily protein
AT1G08100.1	1.80322	2.00388	2.1598	0	0.0897739	0	0.624207	0.676087	0.239757	0.0933599	0	0	0.0412556	-5.70947	1.26e-12	0.0412556	-3.6839	0.00318917	0.0412556	-1.93769	0.000564779	0.0412556	0.0646817	1	nitrate transporter 2.2
AT3G10113.1	32.2325	29.0191	25.0691	6.04333	4.30915	4.58554	13.8886	13.7753	13.6662	6.81527	5.9655	7.26506	4.13897	-2.52198	1.59e-55	4.13897	-1.04595	5.87e-09	4.13897	-1.06233	9.23e-13	4.13897	0.413567	0.166339	Homeodomain-like superfamily protein
AT2G07739.1	0.450804	0.222653	0.385679	2.14697	3.14209	2.80227	0.312103	0.507066	0.239757	2.89416	1.76444	2.14226	3.22376	2.8941	4.67e-13	3.22376	2.65041	1.98e-09	3.22376	-0.00910418	1	3.22376	-0.250447	0.761814	Ycf1 protein
AT5G15948.1	25.3953	24.2692	23.3721	2.14697	1.7057	1.52851	15.2931	20.7052	13.5063	6.81527	5.79745	4.0051	4.03321	-3.75153	8.72e-29	4.03321	-1.57175	2.14e-06	4.03321	-0.561544	0.185655	4.03321	1.61763	5.75e-05	conserved peptide upstream open reading frame 10
AT5G15950.1	26.5223	25.234	24.452	2.14697	2.0648	1.52851	15.9953	22.0574	13.9858	7.28207	5.88147	4.19138	4.08867	-3.72304	1.87e-27	4.08867	-1.58163	2.72e-06	4.08867	-0.550848	0.21134	4.08867	1.58999	9.88e-05	Adenosylmethionine decarboxylase family protein
AT2G05380.1	248.318	180.126	149.566	2.54456	5.11711	7.13305	291.27	213.39	324.951	14.8442	11.0068	11.0839	8.46407	-5.28791	1.02e-34	8.46407	-4.48866	4.94e-27	8.46407	0.52133	0.399978	8.46407	1.32034	0.0071243	glycine-rich protein 3 short isoform
AT3G22840.1	30.7298	29.1676	25.3777	2.46504	3.32164	3.05702	28.5575	22.4799	23.4962	10.5497	8.82221	8.84847	4.71488	-3.27003	8.54e-44	4.71488	-1.40165	3.63e-10	4.71488	-0.193777	0.666166	4.71488	1.67422	7.4e-10	Chlorophyll A-B binding family protein
AT5G15950.2	24.4186	22.9333	22.5236	2.06745	1.7057	1.52851	14.4348	20.2826	13.0268	6.62855	5.71343	3.91196	3.98213	-3.70963	1.63e-28	3.98213	-1.55119	2.45e-06	3.98213	-0.550043	0.193786	3.98213	1.60778	6e-05	Adenosylmethionine decarboxylase family protein
AT2G05380.2	218.34	160.162	130.745	2.14697	4.66824	6.45372	255.613	185.755	281.955	12.7903	9.66242	9.50047	8.26896	-5.26253	9.66e-36	8.26896	-4.49973	3.47e-28	8.26896	0.506264	0.405469	8.26896	1.26881	0.00992549	glycine-rich protein 3 short isoform
AT3G14200.1	15.2522	17.8865	17.4327	5.96381	5.47621	7.47272	23.7979	19.6065	21.4982	12.7903	11.3428	9.68675	4.00652	-1.41634	1.82e-20	4.00652	-0.940973	1.4e-10	4.00652	0.361105	0.034499	4.00652	0.836338	6.21e-06	Chaperone DnaJ-domain superfamily protein
AT1G80340.1	10.7442	9.64831	9.41057	1.74938	2.4239	2.20785	8.34876	7.94403	6.63328	2.24064	1.93248	2.04912	3.66282	-2.225	1.95e-20	3.66282	-1.87862	6.22e-13	3.66282	-0.378203	0.223078	3.66282	-0.0321389	1	gibberellin 3-oxidase 2
AT4G31940.1	86.4042	30.2808	185.974	1.8289	0.359096	0.679339	35.7358	14.3669	4.23571	1.30704	0.420105	0.558851	6.00735	-6.6971	4.93e-13	6.00735	-4.5584	6.37e-07	6.00735	-2.47674	0.00631621	6.00735	-0.338857	0.997992	cytochrome P450, family 82, subfamily C, polypeptide 4
AT4G31710.1	0.901609	1.48436	1.85126	0	0.179548	0.424587	0.858284	1.01413	0.399595	0.746879	0.252063	0.279425	0.241595	-2.775	1.36e-06	0.241595	-0.827002	0.313837	0.241595	-0.894144	0.131248	0.241595	1.04974	0.581531	glutamate receptor 2.4
AT1G14200.1	17.2057	16.031	15.5043	6.99754	5.29666	7.89731	15.5271	16.1416	15.9838	10.0829	7.14179	8.47591	4.00043	-1.26803	3.88e-07	4.00043	-0.892127	0.00110976	4.00043	-0.0327439	1	4.00043	0.343067	0.477654	RING/U-box superfamily protein
AT3G08660.1	1.42755	3.04293	1.23417	0.0795175	0.44887	0.169835	1.63854	0.845109	1.83814	0.653519	0.420105	0.279425	1.64691	-3.02292	7.03e-09	1.64691	-1.66397	0.00270096	1.64691	-0.394502	0.624267	1.64691	0.960303	0.618612	Phototropic-responsive NPH3 family protein
AT5G43570.1	3.5313	3.11715	2.08267	0.397587	0.269322	0.254752	2.4188	1.77473	1.43854	2.05392	1.51238	1.21084	1.87405	-3.19378	1.7e-16	1.87405	-0.242442	0.748234	1.87405	-0.628846	0.0791661	1.87405	2.31912	6.68e-06	Serine protease inhibitor, potato inhibitor I-type family protein
AT4G19690.1	66.6439	48.8353	126.657	14.3927	2.33412	3.73636	50.8728	21.0432	7.75215	11.8567	1.93248	7.54449	6.56645	-3.56019	7.08e-07	6.56645	-1.90132	0.0153467	6.56645	-1.60315	0.0601939	6.56645	0.0556234	1	iron-regulated transporter 1
AT2G46790.1	27.4239	27.8317	22.9865	3.1807	2.51367	2.4626	13.6545	11.6625	15.1846	3.92111	3.86497	2.79425	3.85814	-3.253	1.37e-43	3.85814	-1.93172	2.19e-15	3.85814	-0.948857	2.57e-05	3.85814	0.372122	0.514456	pseudo-response regulator 9
AT4G09110.1	1.72808	2.37497	3.77965	0.31807	0.538644	0.679339	2.1067	0.845109	0.479515	0.18672	0.420105	0.279425	1.69387	-2.34457	9.56e-06	1.69387	-1.90685	0.00968724	1.69387	-1.18314	0.038064	1.69387	-0.745825	0.63994	RING/U-box superfamily protein
AT2G07783.1	0.826475	0.445307	0.925629	4.13491	4.75802	6.19896	1.24841	1.18315	1.11887	2.70744	3.78095	5.02966	1.98071	2.76606	1.65e-13	1.98071	1.68834	1.8e-05	1.98071	0.689435	0.392476	1.98071	-0.387809	0.540533	pseudogene
AT2G46790.2	27.3488	27.3121	22.8322	3.1807	2.60344	2.4626	13.3424	11.24	14.9449	3.92111	3.86497	2.70111	3.84254	-3.22393	3.17e-44	3.84254	-1.90912	2.42e-15	3.84254	-0.969979	1.08e-05	3.84254	0.344534	0.56144	pseudo-response regulator 9
AT1G21550.1	1.27728	1.11327	1.00277	0.238552	0.0897739	0	0.390129	0.0845109	0.639353	0.560159	0.168042	0	-0.113565	-3.22283	3.32e-05	-0.113565	-0.619193	0.744904	-0.113565	-1.5683	0.0405535	-0.113565	1.029	0.822267	Calcium-binding EF-hand family protein
AT3G09440.2	288.289	304.293	322.736	160.864	153.962	136.887	392.938	377.51	359.716	263.368	257.525	196.622	7.7367	-1.01877	7.83e-08	7.7367	-0.655367	0.00185396	7.7367	0.304191	0.28984	7.7367	0.66759	0.00293889	Heat shock protein 70 (Hsp 70) family protein
AT3G09440.1	291.37	308.226	326.593	163.09	155.309	139.604	398.634	380.637	363.952	267.196	261.39	198.858	7.75734	-1.01585	8.67e-08	7.75734	-0.652117	0.00198283	7.75734	0.303733	0.291149	7.75734	0.667461	0.00295224	Heat shock protein 70 (Hsp 70) family protein
AT1G33670.1	2.40429	2.15231	1.85126	0.238552	0	0	1.01434	1.77473	0.319676	0.28008	0.168042	0	-0.945092	-4.5151	1.16e-08	-0.945092	-2.69842	0.00198249	-0.945092	-1.04436	0.212132	-0.945092	0.761629	1	Leucine-rich repeat (LRR) family protein
AT3G02850.1	41.6243	42.4526	32.0885	16.142	17.5059	13.1622	13.0303	12.7612	16.5433	13.8173	9.83046	8.47591	5.07927	-1.3114	3.38e-10	5.07927	-0.399404	0.178058	5.07927	-1.4555	7.07e-12	5.07927	-0.543478	0.0754481	STELAR K+ outward rectifier
AT5G52640.1	16.9052	13.1365	20.1324	71.7248	64.3679	56.6399	25.4364	17.5783	20.5392	131.731	124.519	97.5195	5.09956	1.94151	2.62e-14	5.09956	2.47555	4.7e-22	5.09956	0.341965	0.441187	5.09956	0.876026	0.00316641	heat shock protein 90.1
AT1G70080.1	1.20215	0.66796	0.771358	0.0795175	0	0.0849173	0.780258	0.591577	0.399595	0.560159	0.336084	0.186284	-1.35872	-3.75173	0.000674456	-1.35872	-0.697835	0.714013	-1.35872	-0.567335	0.812028	-1.35872	2.46932	0.229357	Terpenoid cyclases/Protein prenyltransferases superfamily protein
AT5G39050.1	14.8014	14.9178	14.193	4.21443	4.4887	6.70847	17.7119	15.8881	14.8649	9.42935	7.72994	7.07878	4.4689	-1.50957	6.01e-08	4.4689	-0.999477	0.000791036	4.4689	0.142359	0.885869	4.4689	0.652292	0.108208	HXXXD-type acyl-transferase family protein
AT5G02170.2	9.46689	11.6522	13.1902	6.67947	5.20689	3.82128	7.5685	9.63425	7.91199	8.96255	9.74644	7.73077	2.71759	-1.12203	1.57e-05	2.71759	0.0768508	0.97828	2.71759	-0.450612	0.209052	2.71759	0.748179	0.0256224	Transmembrane amino acid transporter family protein
AT5G56080.1	20.8121	17.5154	16.8927	0.874692	0.44887	0.169835	9.28507	2.19728	3.91604	0.840239	0.672169	0.558851	4.96029	-5.16554	1.26e-19	4.96029	-2.87884	1.3e-06	4.96029	-1.83756	0.000527762	4.96029	0.447311	0.869546	nicotianamine synthase 2
AT3G21560.1	51.3917	52.5462	52.6066	19.3227	20.648	20.8047	66.8681	56.6223	60.4987	38.8377	34.8687	44.8012	5.99419	-1.36488	2.02e-11	5.99419	-0.635214	0.00559094	5.99419	0.233188	0.526298	5.99419	0.962817	2.49e-05	UDP-Glycosyltransferase superfamily protein
AT5G10100.1	13.1485	12.1717	12.7274	3.26022	3.23186	3.82128	7.02232	6.25381	7.91199	2.42736	3.1928	3.16682	2.67744	-1.8802	7.16e-17	2.67744	-1.265	1.66e-06	2.67744	-0.842421	0.000330682	2.67744	-0.227322	0.795858	Haloacid dehalogenase-like hydrolase (HAD) superfamily protein
AT4G19690.2	171.08	122.608	319.882	35.7829	7.63078	11.3789	125.934	52.3968	20.1396	29.9685	5.71343	16.393	8.09822	-3.48349	2.42e-07	8.09822	-1.93048	0.00803424	8.09822	-1.62806	0.0387827	8.09822	-0.0750861	1	iron-regulated transporter 1
AT2G17330.1	2.47942	1.41014	1.46558	0.556622	0.0897739	0.169835	1.24841	1.26766	1.51846	1.12032	1.00825	0.745135	-0.729171	-2.62649	2.62e-07	-0.729171	-0.48357	0.532776	-0.729171	-0.406084	0.605829	-0.729171	1.73342	0.0159367	CYP51G2 (CYTOCHROME P450 51G2)
AT3G05950.1	0.225402	0.66796	0.53995	9.62162	11.5808	7.47272	3.19906	1.69022	6.87304	57.7898	35.2888	10.9907	2.18189	4.29351	5.05e-10	2.18189	3.14046	8.59e-07	2.18189	3.01224	4.21e-05	2.18189	1.85875	0.00869134	RmlC-like cupins superfamily protein
AT4G22070.1	19.2343	25.6051	31.3171	8.58789	6.10463	4.58554	16.7756	15.4655	18.5412	8.86919	9.91449	9.31418	3.93401	-1.97562	2.12e-19	3.93401	-0.852647	0.000529871	3.93401	-0.583631	0.0255247	3.93401	0.539241	0.111768	WRKY DNA-binding protein 31
AT4G40020.1	4.43291	3.48823	4.24247	1.66987	0.807965	0.93409	1.79459	2.36631	1.91806	1.8672	1.26032	1.86284	0.631283	-1.80452	2.67e-10	0.631283	-0.288716	0.628808	0.631283	-1.00087	0.000482015	0.631283	0.514558	0.412918	Myosin heavy chain-related protein
AT5G02170.1	11.7961	13.5076	16.8927	8.42885	6.37395	4.58554	9.20705	11.8315	8.95094	10.3629	11.7629	9.22104	2.9691	-1.11729	2.18e-05	2.9691	0.0664453	0.995767	2.9691	-0.493087	0.160012	2.9691	0.690588	0.0466884	Transmembrane amino acid transporter family protein
AT5G57180.2	11.8712	9.05457	10.5676	4.77105	4.30915	2.97211	11.3918	7.85952	10.7891	5.13479	4.3691	4.37767	4.75899	-1.38095	2.4e-10	4.75899	-1.11607	1.44e-06	4.75899	-0.0652862	1	4.75899	0.199444	0.781728	chloroplast import apparatus 2
AT4G37950.1	2.62969	1.70701	3.47111	0.556622	0.359096	0.679339	2.34077	1.43669	1.83814	0.466799	0.75619	0.465709	-0.48825	-2.25993	5.82e-07	-0.48825	-1.70595	0.00132068	-0.48825	-0.466465	0.483559	-0.48825	0.0862656	1	Rhamnogalacturonate lyase family protein
AT5G64120.1	570.117	487.017	427.024	118.242	80.8863	126.017	786.656	608.732	776.494	182.052	221.396	206.402	8.87322	-2.19024	1.82e-13	8.87322	-1.83234	2.09e-09	8.87322	0.549299	0.192219	8.87322	0.907186	0.0134174	Peroxidase superfamily protein
AT3G14770.1	20.2111	21.82	21.7523	5.80478	4.30915	7.47272	12.7182	12.4231	13.1067	6.53519	4.87322	6.51993	4.45239	-1.85212	2.33e-38	4.45239	-1.09888	3.75e-11	4.45239	-0.736956	9.75e-08	4.45239	0.0162078	1	Nodulin MtN3 family protein
AT2G46670.1	10.5939	8.83191	8.48494	1.19276	1.25684	1.01901	5.77391	4.31006	5.67425	1.30704	1.93248	1.1177	2.45666	-2.99886	3.4e-30	2.45666	-1.83687	2.23e-10	2.45666	-0.820904	0.00062457	2.45666	0.340395	0.790186	CCT motif family protein
AT2G32530.1	7.96421	7.19912	7.94499	3.81684	2.87277	3.56653	7.10035	5.66223	8.71118	6.53519	4.70518	4.28452	3.99558	-1.16548	1.89e-05	3.99558	-0.470815	0.173707	3.99558	-0.103778	0.960374	3.99558	0.590707	0.152138	cellulose synthase-like B3
AT1G48000.1	2.47942	2.5234	2.93116	0.397587	0.807965	0.169835	1.24841	1.60571	2.79717	0.653519	0.504126	1.39713	1.32952	-2.52077	2.26e-07	1.32952	-1.14912	0.0367292	1.32952	-0.486695	0.464722	1.32952	0.883047	0.448617	myb domain protein 112
AT2G07599.1	0	0.0742178	0.0771358	0.63614	0.538644	0.509504	0.156052	0.0845109	0	0.28008	0.252063	0.558851	-1.20042	3.24939	0.000734062	-1.20042	2.02057	0.103842	-1.20042	0.590802	1	-1.20042	-0.630488	0.691909	unknown protein
AT3G49580.1	5.86046	6.45694	11.7246	21.8673	15.7104	22.3333	6.00799	4.6481	6.07385	29.315	22.1816	20.9569	4.43116	1.31776	0.000159316	4.43116	2.11119	2.34e-09	4.43116	-0.520319	0.344507	4.43116	0.273251	0.754798	response to low sulfur 1
AT5G24120.1	32.8336	32.73	29.3116	11.4505	9.69558	10.1901	19.1944	16.8177	20.0597	16.7114	14.1155	16.2998	5.16233	-1.59512	1.27e-28	5.16233	-0.253631	0.22317	5.16233	-0.757685	2.35e-07	5.16233	0.583757	0.00209241	sigma factor E
AT5G62330.1	3.98211	5.19524	4.70528	1.43131	0.538644	1.18884	2.57485	2.11277	2.23773	0.466799	1.00825	0.838276	-0.0043887	-2.10585	2.71e-12	-0.0043887	-1.55762	0.000136449	-0.0043887	-0.998109	0.000840825	-0.0043887	-0.450163	0.694528	unknown protein
AT3G49580.2	3.3059	2.67184	5.3995	10.2578	7.63078	10.6996	2.88696	2.36631	3.03693	13.4438	9.83046	8.94161	3.37106	1.33038	6.7e-05	3.37106	1.95182	1.18e-08	3.37106	-0.451474	0.448191	3.37106	0.170237	0.904666	response to low sulfur 1
AT4G00910.1	53.9463	66.4991	56.3091	16.4601	23.0719	19.1913	18.4921	21.0432	29.8897	16.9915	18.7367	13.5987	4.58501	-1.59109	1.07e-16	4.58501	-0.491367	0.0443918	4.58501	-1.3479	5.12e-12	4.58501	-0.248172	0.543386	Aluminium activated malate transporter family protein
AT5G51440.1	7.21287	7.79286	8.02212	18.6071	18.4934	17.0684	15.3711	13.2682	10.869	60.4038	57.0503	42.5658	3.58985	1.23322	7.35e-09	3.58985	2.017	1.32e-24	3.58985	0.778574	0.00154925	3.58985	1.56234	4.31e-15	HSP20-like chaperones superfamily protein
AT2G38600.1	4.58318	4.37885	6.71081	1.51083	1.79548	2.54752	1.71657	0.760598	1.19879	0.560159	1.09227	0.372567	1.60597	-1.41762	3.51e-05	1.60597	-0.835832	0.209553	1.60597	-2.0728	1e-08	1.60597	-1.4902	0.00708198	HAD superfamily, subfamily IIIB acid phosphatase
AT3G54830.1	2.02862	3.19136	3.16257	0.159035	0.179548	0.0849173	1.17039	1.09864	1.35862	0.18672	0.0840211	0.186284	3.01432	-4.21582	3.37e-18	3.01432	-2.92651	1.03e-05	3.01432	-1.19963	0.000855929	3.01432	0.084096	1	Transmembrane amino acid transporter family protein
AT3G47380.1	2.70483	1.11327	1.77412	0.238552	0.179548	0.339669	1.48249	1.69022	1.43854	2.52072	1.00825	0.745135	0.631364	-2.8298	3.65e-07	0.631364	-0.115952	1	0.631364	-0.277472	0.823421	0.631364	2.43223	0.000409415	Plant invertase/pectin methylesterase inhibitor superfamily protein
AT2G19060.1	32.4579	34.5855	31.0857	5.64574	3.77051	4.75537	15.3711	12.0851	14.3055	7.65551	5.37735	2.60797	4.09034	-2.78294	2.68e-48	4.09034	-1.4158	1.65e-11	4.09034	-1.23072	7.07e-12	4.09034	0.136293	0.906316	SGNH hydrolase-type esterase superfamily protein
AT4G11020.1	1.87835	1.70701	2.1598	0.477105	0.269322	0.424587	1.63854	2.11277	2.0779	0.653519	0.504126	0.558851	-0.67803	-2.2499	8.6e-08	-0.67803	-1.74751	6.59e-05	-0.67803	0.0193381	1	-0.67803	0.519563	0.705841	unknown protein
AT5G57180.1	12.0215	8.68348	10.0277	4.5325	4.57847	2.88719	10.6115	8.02854	10.5493	4.85471	4.03301	3.81881	4.68776	-1.35433	2.32e-10	4.68776	-1.20144	1.22e-07	4.68776	-0.0719452	0.983647	4.68776	0.0808027	1	chloroplast import apparatus 2
AT1G60750.1	12.3971	11.9491	8.71634	1.59035	1.7057	2.29277	8.50481	4.90163	7.75215	4.66799	3.02476	1.58341	2.9418	-2.55954	6.28e-12	2.9418	-1.18917	0.00396263	2.9418	-0.641815	0.183553	2.9418	0.728117	0.265368	NAD(P)-linked oxidoreductase superfamily protein
AT3G13640.1	3.45617	3.93354	3.2397	1.90842	1.61593	1.52851	2.65288	2.70435	2.63733	2.61408	3.36084	2.32855	1.14548	-1.06558	0.000957573	1.14548	0.0611895	1	1.14548	-0.410798	0.4045	1.14548	0.715709	0.139091	RNAse l inhibitor protein 1
AT4G04450.1	7.36314	8.83191	5.86232	0.95421	1.16706	0.764256	6.9443	7.01441	6.39353	0.653519	0.840211	1.39713	2.61408	-2.92794	3.01e-26	2.61408	-2.80696	2.16e-22	2.61408	-0.117752	0.891315	2.61408	0.00238315	1	WRKY family transcription factor
AT1G18970.1	34.0357	37.1089	43.8131	8.03127	6.91259	8.40681	35.9699	34.2269	38.521	23.2466	19.913	20.9569	4.52537	-2.29555	1.08e-53	4.52537	-0.762917	2.84e-07	4.52537	-0.0798486	0.866766	4.52537	1.45266	3.86e-19	germin-like protein 4
ATMG00580.1	0.525939	0.593742	0.462815	1.8289	2.69322	1.52851	0.780258	0.253533	0.319676	1.30704	0.924232	1.21084	0.665101	1.90681	2.49e-05	0.665101	1.3034	0.0414632	0.665101	-0.206644	1	0.665101	-0.808243	0.184746	NADH dehydrogenase subunit 4
AT3G48850.1	2.25402	4.15619	6.32513	1.3518	0.718191	1.61343	2.34077	1.69022	2.39757	1.02696	1.17629	0.838276	1.05688	-1.77396	0.000195431	1.05688	-1.06986	0.0890369	1.05688	-0.979829	0.0993696	1.05688	-0.275919	0.963771	phosphate transporter 3;2
AT4G33666.1	6.01073	6.16007	6.40227	1.90842	1.07729	1.61343	3.82327	3.1269	3.11684	1.58712	2.01651	2.14226	4.09529	-1.99464	9.97e-14	4.09529	-0.805563	0.0207309	4.09529	-0.879431	0.00121572	4.09529	0.309312	0.737932	unknown protein
AT1G65570.1	15.8533	15.3631	12.3417	6.8385	4.39892	6.45372	11.1577	14.1978	11.3485	10.2696	11.6789	8.38276	2.01794	-1.29423	1.84e-08	2.01794	-0.271428	0.427859	2.01794	-0.248495	0.549693	2.01794	0.774198	0.00817251	Pectin lyase-like superfamily protein
AT5G57180.3	10.8193	7.49599	8.4078	3.6578	4.21937	2.54752	9.75323	6.50734	9.43045	3.82775	3.69693	3.35311	4.44873	-1.35786	6.36e-09	4.44873	-1.23978	5.53e-07	4.44873	-0.05381	1	4.44873	0.0640981	1	chloroplast import apparatus 2
AT2G19500.1	1.65295	1.41014	1.85126	0.556622	0.269322	0.424587	0.156052	0.422555	0.559434	1.02696	0.504126	0.745135	-0.618603	-1.9306	6.51e-05	-0.618603	0.975067	0.235439	-0.618603	-2.08942	7.18e-05	-0.618603	0.816765	0.414925	cytokinin oxidase 2
AT4G14690.1	9.39176	6.08586	4.47388	1.66987	1.34661	2.03802	12.9523	7.09892	5.91401	5.69495	2.85672	4.09824	3.17336	-1.97304	1.41e-05	3.17336	-1.03995	0.0373705	3.17336	0.380212	0.656174	3.17336	1.31271	0.0241893	Chlorophyll A-B binding family protein
ATMG00180.1	0.225402	0.296871	0.53995	4.77105	3.86028	3.82128	0.312103	0.253533	0.479515	2.05392	2.35259	2.70111	0.92301	3.52722	6.84e-27	0.92301	2.72289	5.27e-11	0.92301	-0.00988	1	0.92301	-0.811691	0.00525978	cytochrome C biogenesis 452
AT5G64510.1	1.27728	2.0781	2.62262	6.28188	4.39892	4.67045	5.69588	6.00028	3.99595	8.86919	8.99025	8.38276	1.95016	1.36279	5.29e-06	1.95016	0.742187	0.0117104	1.95016	1.38907	8.52e-06	1.95016	0.768332	0.0168839	unknown protein
AT1G76430.1	3.0805	2.89449	3.70252	0.874692	0.628418	0.509504	5.53983	4.22555	5.27466	0.746879	1.00825	1.02456	1.29866	-2.23618	2.61e-12	1.29866	-2.42187	7.38e-18	1.29866	0.640182	0.0133291	1.29866	0.453095	0.690315	phosphate transporter 1;9
AT3G23730.1	22.6905	25.8278	20.8267	8.42885	6.37395	6.3688	14.981	12.3386	14.2256	10.7364	11.0908	5.86793	4.32685	-1.70653	1.81e-21	4.32685	-0.58158	0.0074147	4.32685	-0.73791	0.000106963	4.32685	0.386972	0.227958	xyloglucan endotransglucosylase/hydrolase 16
AT2G07815.1	0.225402	0.296871	0	1.03373	0.807965	1.01901	0.0780258	0.253533	0.159838	0.746879	0.336084	0.931418	-0.682395	2.37843	0.000237992	-0.682395	1.96518	0.0290389	-0.682395	-0.116305	1	-0.682395	-0.524624	0.678936	unknown protein
AT1G44318.1	2.02862	1.78123	1.92839	0.95421	0.44887	0.594421	1.56052	1.94375	1.19879	1.77384	1.5964	0.558851	-0.547463	-1.49117	0.000980212	-0.547463	-0.246914	0.809196	-0.547463	-0.288922	0.773946	-0.547463	0.95432	0.193923	Aldolase superfamily protein
AT4G01630.1	55.0733	53.2141	51.3724	6.91802	3.59096	9.25599	29.1036	29.4098	27.1725	14.5641	10.7547	10.0593	3.37245	-3.0083	1.01e-30	3.37245	-1.27623	2.97e-06	3.37245	-0.897707	0.00146042	3.37245	0.83423	0.0141587	expansin A17
AT2G07718.1	0.150268	0.0742178	0.462815	2.38552	2.78299	4.9252	0.312103	0.0845109	0.0799191	2.8008	1.26032	2.51483	1.03208	3.83189	1.7e-15	1.03208	3.66871	1.57e-10	1.03208	-0.467606	0.944688	1.03208	-0.624894	0.27003	Cytochrome b/b6 protein
ATMG00590.1	0.150268	0.0742178	0.462815	2.38552	2.78299	4.9252	0.312103	0.0845109	0.0799191	2.8008	1.26032	2.51483	1.03208	3.83189	1.7e-15	1.03208	3.66871	1.57e-10	1.03208	-0.467605	0.944688	1.03208	-0.624894	0.27003	Cytochrome b/b6 protein
AT3G28740.1	179.796	163.724	150.878	71.5657	62.9315	78.2088	83.8778	82.7362	90.5483	63.0179	66.1246	45.5463	6.82077	-1.2165	1.85e-12	6.82077	-0.557307	0.00572184	6.82077	-0.942905	2.04e-07	6.82077	-0.283708	0.34278	Cytochrome P450 superfamily protein
AT4G34135.2	72.8801	82.6044	78.2157	25.207	24.9572	31.3345	75.1389	69.5525	69.6095	31.4623	32.4321	25.3346	5.76685	-1.5195	2.06e-28	5.76685	-1.26289	3.01e-19	5.76685	-0.124901	0.688134	5.76685	0.131686	0.738956	UDP-glucosyltransferase 73B2
AT5G19700.1	1.95349	1.78123	1.77412	0.0795175	0.269322	0.339669	1.56052	1.94375	0.639353	0.28008	0	0.0931418	0.477227	-2.96607	1.15e-05	0.477227	-3.40414	5.6e-05	0.477227	-0.411927	0.752743	0.477227	-0.852069	0.824001	MATE efflux family protein
AT4G04840.1	17.7316	18.7771	17.4327	7.55416	4.21937	4.67045	9.90928	8.36658	8.7911	8.12231	10.9227	13.133	5.86454	-1.70651	2.98e-10	5.86454	0.248866	0.597154	5.86454	-0.993515	0.000801709	5.86454	0.961778	0.00398095	methionine sulfoxide reductase B6
AT5G16970.1	38.9195	31.8394	34.7111	12.4047	11.8502	12.9074	39.325	26.0294	33.8058	19.6989	16.3001	16.0204	5.86363	-1.50376	7.16e-17	5.86363	-0.932115	1.02e-06	5.86363	-0.0878681	0.912259	5.86363	0.483715	0.0620234	alkenal reductase
AT2G39510.1	16.3792	18.2576	15.9671	6.52043	6.28418	5.34979	4.99365	10.3948	7.27264	3.08088	6.97375	6.89249	4.51686	-1.47712	8.34e-09	4.51686	-0.410587	0.267729	4.51686	-1.16187	1.67e-05	4.51686	-0.0953474	1	nodulin MtN21 /EamA-like transporter family protein
AT2G07749.1	0	0	0.0771358	0.95421	1.07729	0.849173	0.234077	0	0.239757	0.933599	0.588147	0.745135	-0.974149	4.78468	1.3e-07	-0.974149	2.14625	0.00435735	-0.974149	2.2926	0.41015	-0.974149	-0.34819	0.862063	Mitovirus RNA-dependent RNA polymerase
AT1G48260.1	3.90697	5.12103	5.47664	2.22649	1.43638	2.12293	2.49683	2.95788	3.59636	2.98752	1.68042	1.76969	2.77908	-1.31443	7.43e-05	2.77908	-0.495115	0.335909	2.77908	-0.678827	0.0963982	2.77908	0.140331	0.975486	CBL-interacting protein kinase 17
AT3G09340.1	1.57782	1.63279	0.771358	0	0.0897739	0.169835	0.93631	0.845109	0.719272	0.18672	0.504126	0.279425	-1.03458	-3.82149	3.67e-06	-1.03458	-1.31884	0.193665	-1.03458	-0.666655	0.555929	-1.03458	1.8243	0.372857	Transmembrane amino acid transporter family protein
AT1G78340.1	126	140.865	127.197	37.3732	34.0243	48.5727	85.8284	82.4827	84.7142	43.5057	38.2296	33.6242	6.17423	-1.71518	3.4e-39	6.17423	-1.13308	1.51e-16	6.17423	-0.639056	7.08e-06	6.17423	-0.0569685	0.981499	glutathione S-transferase TAU 22
AT3G63380.1	34.7871	45.7924	52.1438	20.9926	14.4536	11.294	23.1737	20.9587	29.5701	16.6181	15.88	10.525	3.90939	-1.50323	2.61e-09	3.90939	-0.775661	0.00844219	3.90939	-0.847984	0.0031062	3.90939	-0.120432	0.953128	ATPase E1-E2 type family protein / haloacid dehalogenase-like hydrolase family protein
AT1G76800.1	30.1288	23.527	34.3254	3.81684	2.87277	3.31178	8.42679	5.74674	4.71523	2.14728	3.02476	2.8874	4.39334	-3.12984	1.02e-25	4.39334	-1.22411	0.000757744	4.39334	-2.21624	2.54e-14	4.39334	-0.310576	0.721828	Vacuolar iron transporter (VIT) family protein
AT3G09400.1	5.10912	5.71477	6.47941	1.51083	1.43638	1.86818	2.96498	2.61984	2.23773	1.12032	0.840211	0.186284	0.855102	-1.83732	4.93e-13	0.855102	-1.84379	8.61e-07	0.855102	-1.14047	4.66e-06	0.855102	-1.14681	0.0321473	pol-like 3
AT2G29450.1	18.7084	20.2614	20.441	8.82644	7.00237	9.59566	20.9889	23.2405	25.4143	22.4064	20.9212	15.741	6.10498	-1.22047	4.77e-14	6.10498	-0.23626	0.262141	6.10498	0.228945	0.346661	6.10498	1.21305	9.97e-13	glutathione S-transferase tau 5
AT5G48430.1	52.7441	59.0031	51.7581	18.0505	11.132	13.2471	45.333	31.9451	41.8776	36.5037	34.4486	21.6089	5.48422	-1.94165	3.77e-28	5.48422	-0.364192	0.104472	5.48422	-0.455706	0.0369078	5.48422	1.1217	8.74e-09	Eukaryotic aspartyl protease family protein
AT3G09400.2	5.10912	5.64055	6.17086	1.3518	1.34661	1.86818	2.88696	2.53533	2.23773	1.12032	0.75619	0.186284	0.829815	-1.88254	5.11e-14	0.829815	-1.87394	6.19e-07	0.829815	-1.13838	3.19e-06	0.829815	-1.12969	0.0412371	pol-like 3
ATMG00290.1	0.150268	0.371089	0.385679	1.27228	1.97503	1.35868	0.858284	0.338044	0.319676	0.466799	0.924232	0.838276	-0.27273	2.30111	2.23e-05	-0.27273	0.542894	0.644884	-0.27273	0.737672	0.695855	-0.27273	-1.01948	0.132979	mitochondrial ribosomal protein S4
AT3G46230.1	0.450804	0.148436	0.617086	2.14697	1.79548	2.63244	0.312103	0.591577	0.399595	3.45431	3.78095	4.0051	0.607816	2.41503	5.4e-06	0.607816	3.0872	1.27e-09	0.607816	0.0954477	1	0.607816	0.769246	0.211369	heat shock protein 17.4
AT2G07734.1	0.150268	0.371089	0.53995	1.51083	2.15457	1.78326	0.858284	0.338044	0.319676	0.560159	1.00825	0.931418	-0.0866918	2.32793	1.44e-05	-0.0866918	0.704566	0.474777	-0.0866918	0.520201	0.880392	-0.0866918	-1.10188	0.0963915	Alpha-L RNA-binding motif/Ribosomal protein S4 family protein
AT5G57660.1	67.6207	63.9757	65.1026	26.7974	25.6753	24.7959	51.419	48.2557	56.6626	26.8876	26.7187	29.8985	6.81216	-1.34729	1.03e-27	6.81216	-0.905346	5.42e-12	6.81216	-0.330958	0.0340701	6.81216	0.110971	0.775628	CONSTANS-like 5
AT3G56290.1	14.2003	14.5467	12.6503	4.61201	4.21937	5.17996	11.6258	10.3948	10.4694	7.84223	7.05777	10.3387	4.60364	-1.56013	5.6e-13	4.60364	-0.36749	0.20564	4.60364	-0.349011	0.252711	4.60364	0.843482	0.00208607	unknown protein
AT2G07599.2	0.0751341	0.0742178	0.0771358	0.874692	0.897739	0.849173	0.156052	0.0845109	0	0.28008	0.420105	0.838276	-0.980445	3.37012	1.28e-05	-0.980445	2.51065	0.0155469	-0.980445	0.0861324	1	-0.980445	-0.763759	0.455148	unknown protein
AT4G34135.1	131.785	141.236	139.847	43.178	44.7074	62.8388	127.884	121.189	124.834	54.5222	57.3024	45.1738	6.68311	-1.45372	2.25e-19	6.68311	-1.25134	5.35e-14	6.68311	-0.14295	0.70386	6.68311	0.0594235	1	UDP-glucosyltransferase 73B2
AT1G11600.1	4.80858	6.16007	6.63368	2.38552	2.24435	2.12293	7.02232	5.23968	7.27264	2.8008	5.37735	3.16682	3.90808	-1.37654	8.96e-07	3.90808	-0.773621	0.00964461	3.90808	0.15274	0.856717	3.90808	0.755311	0.0653393	cytochrome P450, family 77, subfamily B, polypeptide 1
AT5G13210.1	9.31663	11.2811	9.79624	3.10118	2.96254	1.86818	7.49048	7.94403	7.43247	5.13479	5.71343	3.91196	2.63616	-1.93305	9.81e-13	2.63616	-0.626909	0.0556483	2.63616	-0.410671	0.283477	2.63616	0.895182	0.0179902	Uncharacterised conserved protein UCP015417, vWA
AT3G59340.1	15.6279	19.8161	19.6696	10.5758	8.6183	6.70847	18.18	18.4234	23.8958	10.7364	13.6954	9.1279	3.95322	-1.08444	3.3e-12	3.95322	-0.84453	1.35e-07	3.95322	0.134972	0.677544	3.95322	0.374808	0.131717	Eukaryotic protein of unknown function (DUF914)
AT2G02950.1	13.9749	13.0623	11.1847	3.57829	3.68073	3.82128	6.55417	9.04267	7.99191	3.92111	4.20105	3.81881	3.73898	-1.78465	4.61e-17	3.73898	-0.976246	8.06e-05	3.73898	-0.698478	0.00223581	3.73898	0.1098	0.982438	phytochrome kinase substrate 1
ATMG00160.1	0.37567	0.296871	0.462815	1.98794	2.87277	2.80227	0.468155	0.507066	0.239757	1.8672	1.93248	2.98054	0.593925	2.71895	2.73e-12	0.593925	2.44878	1.49e-08	0.593925	0.0947081	1	0.593925	-0.173546	0.900682	cytochrome oxidase 2
AT5G19040.1	38.9195	39.1128	41.1134	15.1083	9.78536	10.3599	35.8139	27.6351	36.523	18.8587	18.8207	16.1135	5.10771	-1.75029	2.54e-32	5.10771	-0.893987	7.93e-09	5.10771	-0.251899	0.232415	5.10771	0.604344	0.0016202	isopentenyltransferase 5
AT1G01060.4	15.9284	16.031	15.89	1.43131	2.0648	1.78326	6.16404	6.67636	5.83409	2.52072	2.18455	1.02456	5.07644	-3.1808	1.56e-43	5.07644	-1.69291	2.76e-10	5.07644	-1.35702	1.69e-11	5.07644	0.130496	0.997992	Homeodomain-like superfamily protein
AT3G24400.1	1.57782	1.33592	1.85126	0.159035	0.359096	0.509504	0.702232	0.845109	0.479515	0.18672	0.336084	0.279425	-0.227725	-2.19583	1.71e-06	-0.227725	-1.2854	0.116927	-0.227725	-1.22453	0.00766856	-0.227725	-0.314937	0.982093	pseudogene
AT2G43890.1	5.78532	6.30851	5.1681	0.31807	0.0897739	0.0849173	1.17039	1.26766	1.35862	0.746879	0.336084	0	-0.158339	-5.01094	2.68e-36	-0.158339	-1.78343	0.00147608	-0.158339	-2.17773	5.25e-15	-0.158339	1.04429	0.63688	Pectin lyase-like superfamily protein
AT3G13600.1	12.1717	12.0233	8.33066	6.28188	3.23186	3.99111	8.19271	9.80327	9.98989	6.16175	9.24232	4.75023	2.26309	-1.26123	0.000201782	2.26309	-0.468647	0.305788	2.26309	-0.21752	0.80992	2.26309	0.574934	0.296467	calmodulin-binding family protein
AT4G15300.1	6.16099	5.04681	5.47664	1.98794	2.96254	1.9531	5.07168	5.49321	4.39555	4.48127	3.94899	2.14226	0.743651	-1.27653	1.21e-05	0.743651	-0.495635	0.168331	0.743651	-0.157954	0.865606	0.743651	0.622663	0.192068	cytochrome P450, family 702, subfamily A, polypeptide 2
AT5G62130.1	20.2862	19.2224	21.598	10.6553	8.52852	9.00124	12.7182	15.1275	16.5433	8.21567	9.5784	10.7113	4.32347	-1.1114	9.51e-15	4.32347	-0.637087	0.000158237	4.32347	-0.461467	0.0045038	4.32347	0.0128113	1	Per1-like family protein
ATMG01360.1	0.676207	0.964831	1.15704	4.37346	4.66824	2.4626	0.546181	0.760598	0.559434	1.96056	2.85672	3.44625	1.12343	2.02956	2.19e-09	1.12343	2.13504	1.9e-07	1.12343	-0.580822	0.533246	1.12343	-0.473862	0.359611	cytochrome oxidase
AT5G20790.2	2.62969	2.30075	5.1681	0.874692	0.179548	0.849173	6.00799	4.98615	6.23369	1.30704	1.17629	1.76969	2.98437	-2.36399	2.15e-08	2.98437	-2.01588	1.28e-07	2.98437	0.772688	0.0752739	2.98437	1.11915	0.117976	unknown protein
AT3G28210.1	6.31126	8.98035	7.63644	2.94215	1.97503	4.07603	9.051	8.02854	7.43247	8.30903	9.07428	8.94161	3.26203	-1.34201	2.65e-09	3.26203	0.102845	0.840595	3.26203	0.0965447	0.935094	3.26203	1.54111	2.69e-11	zinc finger (AN1-like) family protein
AT4G12170.1	1.42755	0.890613	1.85126	0.397587	0.179548	0.424587	4.13537	3.54946	2.87709	1.96056	1.76444	0.558851	1.2466	-2.0074	0.000595145	1.2466	-1.28992	0.00442066	1.2466	1.33865	0.00279181	1.2466	2.05269	0.00146755	Thioredoxin superfamily protein
AT2G07723.1	2.02862	2.30075	2.39121	9.93969	10.324	9.59566	1.24841	1.69022	2.55741	4.01447	4.87322	6.2405	2.24056	2.14662	2.5e-24	2.24056	1.45589	5.89e-08	2.24056	-0.289612	0.649152	2.24056	-0.979847	6.05e-06	pseudogene
AT1G72490.1	9.54203	9.79674	8.02212	2.30601	2.87277	4.07603	7.80258	8.02854	8.55134	2.70744	2.68867	2.79425	2.92633	-1.5643	1.14e-08	2.92633	-1.57049	7.98e-08	2.92633	-0.166575	0.823498	2.92633	-0.172946	0.923155	unknown protein
AT3G59140.1	38.4686	34.9566	41.9619	18.3685	16.2491	17.493	42.0559	44.9598	39.6399	25.4872	27.6429	20.3049	4.64958	-1.14572	5.15e-07	4.64958	-0.785223	0.00165246	4.64958	0.134391	0.856717	4.64958	0.494844	0.135885	multidrug resistance-associated protein 14
AT2G43500.1	9.24149	8.68348	9.95052	3.10118	2.87277	2.20785	8.42679	6.9299	5.99393	2.14728	3.36084	2.14226	2.98098	-1.76292	7.24e-11	2.98098	-1.46865	9.06e-07	2.98098	-0.383114	0.333462	2.98098	-0.0890326	1	Plant regulator RWP-RK family protein
AT2G43500.2	9.31663	8.75769	10.0277	3.1807	2.87277	2.20785	8.42679	7.09892	5.99393	2.14728	3.36084	2.14226	2.98497	-1.76023	5.26e-11	2.98497	-1.47978	6.11e-07	2.98497	-0.38357	0.324921	2.98497	-0.103315	1	Plant regulator RWP-RK family protein
ATMG00170.1	0	0.0742178	0	1.19276	1.97503	1.52851	0.0780258	0.0845109	0	0.746879	1.17629	1.49027	-0.246275	5.47903	2.47e-11	-0.246275	4.15636	8.78e-07	-0.246275	0.865248	1	-0.246275	-0.446934	0.643051	unknown protein
ATMG00620.1	0	0.0742178	0	1.19276	1.97503	1.52851	0.0780258	0.0845109	0	0.746879	1.17629	1.49027	-0.246275	5.47903	2.47e-11	-0.246275	4.15636	8.78e-07	-0.246275	0.865248	1	-0.246275	-0.446933	0.643051	unknown protein
AT5G16980.1	4.20751	4.30463	3.47111	1.3518	1.52616	1.18884	3.58919	2.95788	2.87709	1.77384	1.42836	1.86284	2.94519	-1.55597	1.65e-07	2.94519	-0.899668	0.0112738	2.94519	-0.344782	0.421236	2.94519	0.311087	0.734279	Zinc-binding dehydrogenase family protein
ATMG01200.1	0.525939	0.519524	0.848494	3.02166	1.88525	3.31178	1.01434	0.507066	0.719272	2.14728	2.7727	2.14226	0.638574	2.11212	9.48e-09	0.638574	1.63768	5.38e-05	0.638574	0.254515	0.933331	0.638574	-0.219066	0.848747	unknown protein
AT3G47500.1	52.143	48.5384	52.838	21.0721	24.9572	19.9556	29.8839	30.2549	28.4512	16.4313	14.1155	16.4861	5.20594	-1.21964	2.48e-26	5.20594	-0.915301	2.78e-12	5.20594	-0.793028	8.26e-12	5.20594	-0.488685	0.00206459	cycling DOF factor 3
AT2G15490.3	137.345	141.014	128.045	50.7322	55.0314	80.1619	137.638	151.444	135.223	84.0239	75.4509	54.5811	5.97682	-1.12819	1.65e-06	5.97682	-0.986861	7.55e-05	5.97682	0.0621215	1	5.97682	0.203439	0.733669	UDP-glycosyltransferase 73B4
AT5G28960.1	1.80322	2.0781	1.61985	0.397587	0.359096	0.339669	1.48249	1.01413	1.03895	2.42736	1.26032	0.651993	-0.694106	-2.29442	2.26e-05	-0.694106	0.285759	0.780964	-0.694106	-0.630825	0.356884	-0.694106	1.94696	0.00307513	unknown protein
AT5G62130.2	19.61	18.4802	20.8267	10.3373	8.16943	8.74648	11.7819	14.5359	15.5043	7.74887	8.99025	10.3387	4.26073	-1.10699	2.92e-14	4.26073	-0.625245	0.000296532	4.26073	-0.495058	0.00224791	4.26073	-0.0133406	1	Per1-like family protein
AT2G07722.1	0	0	0	1.19276	1.97503	1.35868	0.0780258	0.0845109	0	0.653519	1.17629	1.39713	-0.306588	7.24288	3.87e-12	-0.306588	4.07806	3.33e-06	-0.306588	2.70487	0.856717	-0.306588	-0.472241	0.62997	unknown protein
AT2G46420.2	12.6977	12.6912	12.8817	6.20236	7.36146	5.26487	12.016	10.5639	10.3895	8.96255	9.41036	9.96617	3.95767	-1.02546	1.11e-10	3.95767	-0.219337	0.346205	3.95767	-0.213706	0.384839	3.95767	0.592338	0.00450283	Plant protein 1589 of unknown function
AT1G61810.2	2.17889	2.82027	2.54548	0.63614	0.269322	0.254752	2.18472	0.92962	1.75822	0.560159	1.42836	0.838276	0.424085	-2.64586	1.54e-09	0.424085	-0.768656	0.161967	0.424085	-0.618299	0.220409	0.424085	1.25663	0.0917425	beta-glucosidase 45
AT4G29030.1	0.525939	0.519524	0.617086	0	0	0.0849173	0.624207	0.422555	0.719272	0	0.168042	0.0931418	3.86499	-3.88485	0.000142037	3.86499	-2.58271	0.00411923	3.86499	0.0948283	1	3.86499	1.36762	0.960064	Putative membrane lipoprotein
ATMG00090.1	1.50268	1.70701	1.92839	5.0096	5.92508	2.88719	1.56052	0.92962	1.83814	3.17424	4.03301	3.91196	1.70331	1.42148	1.7e-05	1.70331	1.35006	0.000270221	1.70331	-0.238319	0.867292	1.70331	-0.309242	0.663885	structural constituent of ribosome;protein binding
AT2G15490.1	149.141	151.924	136.53	54.9466	58.8019	87.8894	147.859	163.022	145.133	90.3723	79.9881	58.7725	6.08541	-1.11781	4.61e-06	6.08541	-0.992683	0.000123506	6.08541	0.0594228	1	6.08541	0.184543	0.792987	UDP-glycosyltransferase 73B4
AT2G46420.1	13.5241	13.5076	13.2674	6.52043	7.45124	6.19896	12.4061	11.3245	10.869	9.61607	9.74644	10.2456	4.02894	-1.00015	8.39e-11	4.02894	-0.225649	0.309331	4.02894	-0.219167	0.344214	4.02894	0.555259	0.00602749	Plant protein 1589 of unknown function
AT5G16980.2	4.43291	4.74994	3.39397	1.59035	1.52616	1.35868	3.58919	2.78886	3.3566	2.05392	1.34434	1.95598	3.02555	-1.48504	6.59e-07	3.02555	-0.870806	0.0145914	3.02555	-0.367283	0.402494	3.02555	0.246585	0.849169	Zinc-binding dehydrogenase family protein
AT5G64170.1	54.923	51.8782	56.4634	23.0601	23.1617	19.2762	36.282	33.3818	36.4431	30.1552	26.7187	27.1043	5.40211	-1.31712	7.69e-29	5.40211	-0.338559	0.0221011	5.40211	-0.620951	4.7e-07	5.40211	0.357591	0.0356577	dentin sialophosphoprotein-related
AT5G38910.1	1.95349	0.66796	2.62262	0	0	0	0.234077	0.591577	0.159838	0	0	0	-0.780159	-7.45933	6.12e-11	-0.780159	-4.97761	0.0111645	-0.780159	-2.39174	0.000615552	-0.780159	0	1	RmlC-like cupins superfamily protein
ATMG00830.1	0.300536	0.0742178	0.308543	1.74938	1.34661	2.4626	0.390129	0.422555	0.239757	1.02696	1.42836	2.04912	-0.334535	2.97829	3e-06	-0.334535	2.06676	0.00301372	-0.334535	0.605688	0.911619	-0.334535	-0.304082	0.897046	cytochrome C biogenesis 382
ATMG01280.1	0.225402	0.296871	0.231407	1.43131	1.07729	2.03802	0.390129	0.253533	0.0799191	0.933599	1.00825	2.60797	-0.034367	2.54768	6.33e-06	-0.034367	2.58604	1.56e-05	-0.034367	-0.053311	1	-0.034367	-0.0117216	1	Cytochrome C oxidase subunit II-like, transmembrane domain
AT5G02490.1	12.0215	14.0272	14.6558	29.66	29.2663	25.0506	20.1307	22.9025	18.8609	55.0823	57.8905	37.7224	4.48644	1.04452	2.76e-07	4.48644	1.28448	1.01e-10	4.48644	0.603899	0.0143852	4.48644	0.843852	9.6e-05	Heat shock protein 70 (Hsp 70) family protein
AT3G42180.3	2.70483	3.04293	2.62262	0.795175	1.34661	1.27376	3.43314	3.1269	2.55741	2.334	2.01651	1.30399	1.36901	-1.29957	4.65e-05	1.36901	-0.684007	0.0480112	1.36901	0.122515	0.929867	1.36901	0.737402	0.15772	Exostosin family protein
AT1G02520.1	107.066	117.116	101.742	57.014	57.2758	38.8072	79.7424	79.6093	77.7613	73.941	76.7953	58.6793	5.6838	-1.08999	3.51e-19	5.6838	-0.178518	0.320913	5.6838	-0.45902	0.00105893	5.6838	0.452443	0.00299427	P-glycoprotein 11
AT1G01060.1	16.229	15.9568	15.8128	1.43131	2.24435	1.9531	6.24207	7.01441	6.15377	2.42736	2.10053	0.931418	5.0889	-3.09499	8.77e-43	5.0889	-1.81717	7.04e-12	5.0889	-1.30613	4.57e-11	5.0889	-0.0286498	1	Homeodomain-like superfamily protein
AT5G64170.2	56.2003	53.2141	58.8546	24.2528	24.9572	19.8707	37.3744	34.734	37.7218	30.0619	28.1471	28.9671	5.43999	-1.2841	5.12e-28	5.43999	-0.334092	0.022591	5.43999	-0.614786	4.92e-07	5.43999	0.335209	0.0509854	dentin sialophosphoprotein-related
AT2G15490.2	71.8282	75.1084	68.2652	30.2166	29.2663	44.157	73.5003	80.877	72.0071	45.933	40.1621	29.7122	5.11257	-1.0539	8e-07	5.11257	-0.966607	1.68e-05	5.11257	0.0729443	0.991622	5.11257	0.160221	0.806733	UDP-glycosyltransferase 73B4
AT1G01060.3	14.9517	14.9178	14.8872	1.43131	2.15457	1.78326	5.77391	6.42283	5.91401	2.334	2.01651	0.931418	4.96202	-3.06129	1.48e-41	4.96202	-1.76516	6.63e-11	4.96202	-1.30494	7.36e-11	4.96202	-0.00915883	1	Homeodomain-like superfamily protein
AT2G26820.1	18.483	21.7458	21.9066	4.93008	6.28418	6.28388	23.0956	15.8035	20.6191	8.49575	7.81396	8.66219	3.75751	-1.8305	5.12e-28	3.75751	-1.25575	7.78e-14	3.75751	-0.0597563	0.971274	3.75751	0.514864	0.0500065	phloem protein 2-A3
AT1G01060.5	14.0501	14.6209	14.0387	1.43131	2.0648	1.78326	5.53983	6.08479	5.59434	2.42736	1.76444	0.931418	4.91552	-3.01704	1.21e-38	4.91552	-1.74071	3.62e-10	4.91552	-1.31015	1.98e-10	4.91552	-0.0341605	1	Homeodomain-like superfamily protein
AT2G07741.1	0.525939	0.371089	0.385679	3.97587	2.33412	2.97211	0.780258	0.92962	0.399595	2.89416	1.93248	1.95598	0.709671	2.83274	4.78e-11	0.709671	1.67164	0.000355911	0.709671	0.699268	0.490639	0.709671	-0.461006	0.509508	ATPase, F0 complex, subunit A protein
AT2G16890.1	14.0501	16.4021	17.1241	2.38552	5.83531	3.9062	13.1083	13.5217	12.0678	7.56215	4.62116	4.93652	3.29353	-1.97753	8.6e-11	3.29353	-1.17758	0.000366524	3.29353	-0.29785	0.609232	3.29353	0.501904	0.365817	UDP-Glycosyltransferase superfamily protein
AT4G27410.2	33.059	26.0504	23.835	15.983	9.06717	16.2192	19.7405	16.1416	18.7011	18.2985	19.1568	20.2118	5.88652	-1.00342	1.32e-06	5.88652	0.0785077	0.926701	5.88652	-0.602872	0.0133446	5.88652	0.479034	0.103635	NAC (No Apical Meristem) domain transcriptional regulator superfamily protein
AT2G23410.1	14.2003	13.5076	10.6447	7.07706	5.20689	6.62355	13.6545	13.1837	11.3485	11.2965	10.9227	7.3582	1.95813	-1.01626	4.8e-06	1.95813	-0.366507	0.194171	1.95813	-0.00687437	1	1.95813	0.642781	0.0248466	cis-prenyltransferase
AT1G17170.1	213.907	210.036	224.079	62.8188	60.6872	77.1898	198.576	207.559	203.314	94.0134	91.1629	69.3907	6.83553	-1.69079	3.99e-38	6.83553	-1.25899	4.05e-21	6.83553	-0.0885453	0.828686	6.83553	0.343241	0.0687928	glutathione S-transferase TAU 24
AT1G17180.1	242.908	266.219	258.559	70.4525	74.9612	98.1644	255.222	334.917	253.503	155.444	152.246	113.54	6.594	-1.65609	4.23e-16	6.594	-1.00179	3.85e-06	6.594	0.136035	0.825199	6.594	0.790325	0.00100555	glutathione S-transferase TAU 25
ATCG00190.1	3.0805	3.78511	3.85679	0.95421	1.79548	1.10393	3.51116	3.21142	3.3566	1.30704	1.42836	1.86284	3.30565	-1.484	1.78e-06	3.30565	-1.13041	0.000669969	3.30565	-0.0875808	1	3.30565	0.265498	0.854611	RNA polymerase subunit beta
AT2G13810.1	5.63506	5.64055	4.62815	1.8289	1.16706	1.18884	1.24841	2.61984	1.59838	1.58712	1.51238	0.558851	1.42509	-1.91175	1.69e-06	1.42509	-0.562157	0.407353	1.42509	-1.54272	0.000260823	1.42509	-0.193133	0.997992	AGD2-like defense response protein 1
AT5G65380.1	319.094	341.773	318.648	104.963	99.6491	97.4002	236.808	212.883	224.333	120.341	117.461	114.564	7.93661	-1.69718	3.24e-69	7.93661	-0.935787	4.01e-21	7.93661	-0.539147	1.68e-07	7.93661	0.222236	0.139355	MATE efflux family protein
AT1G34500.1	1.12701	0.816395	0.771358	0.0795175	0	0.169835	0.546181	0.676087	0.639353	0	0	0	-1.53395	-3.27676	8.53e-06	-1.53395	-5.88779	3.34e-05	-1.53395	-0.541368	0.590818	-1.53395	-3.13019	0.641606	MBOAT (membrane bound O-acyl transferase) family protein
AT1G26700.1	5.33452	7.05069	5.3995	1.3518	1.52616	1.27376	1.87262	2.45082	2.63733	2.14728	1.93248	2.51483	0.35016	-2.09483	2.15e-15	0.35016	-0.0794247	0.999367	0.35016	-1.35343	9.32e-08	0.35016	0.661673	0.189445	Seven transmembrane MLO family protein
AT4G39000.1	1.72808	1.63279	1.61985	0.238552	0	0.254752	1.09236	0.845109	1.27871	0.0933599	0	0.186284	-0.851265	-3.22314	2.38e-09	-0.851265	-3.43193	8.35e-06	-0.851265	-0.621785	0.247093	-0.851265	-0.83334	0.879281	glycosyl hydrolase 9B17
AT3G09330.1	3.68157	3.26558	2.62262	0.159035	0.269322	0.424587	2.26275	1.94375	1.27871	0.653519	0.840211	0.558851	-0.225655	-3.45366	5.72e-11	-0.225655	-1.39704	0.013923	-0.225655	-0.799904	0.156972	-0.225655	1.25326	0.268355	Transmembrane amino acid transporter family protein
AT2G31940.1	1.50268	1.85544	2.46835	0.715657	0.44887	1.01901	1.56052	1.43669	1.27871	0.373439	0.672169	0.651993	0.493748	-1.39279	0.000504807	0.493748	-1.30851	0.0104553	0.493748	-0.440401	0.437179	0.493748	-0.356554	0.922012	unknown protein
AT1G21210.1	3.60644	4.08198	5.70805	0.477105	1.16706	2.03802	6.86627	4.6481	5.0349	2.70744	2.60465	1.39713	1.35588	-1.86172	0.000193668	1.35588	-1.29709	0.0150288	1.35588	0.305894	0.805263	1.35588	0.869763	0.299056	wall associated kinase 4
ATMG00210.1	0.300536	0.296871	0.154272	1.59035	1.25684	1.69835	0.468155	0.507066	0.719272	0.746879	1.09227	1.21084	-0.200539	2.54876	4.34e-07	-0.200539	0.838819	0.200092	-0.200539	1.13749	0.254733	-0.200539	-0.571932	0.437393	ribosomal protein L5
AT5G50200.2	71.152	91.8816	95.2627	19.9589	21.9048	27.4283	87.2329	81.2995	70.3288	26.2341	28.1471	29.3397	6.37438	-1.8985	5.78e-44	6.37438	-1.51208	1.41e-28	6.37438	-0.112714	0.728816	6.37438	0.273673	0.244769	nitrate transmembrane transporters
AT5G44130.1	18.0322	17.6638	18.5126	8.90596	3.95005	4.33078	16.5415	14.0288	14.5453	11.1098	9.74644	5.58851	5.05599	-1.64507	1.46e-13	5.05599	-0.76894	0.00209509	5.05599	-0.264079	0.483961	5.05599	0.611932	0.054448	FASCICLIN-like arabinogalactan protein 13 precursor
AT5G50200.3	70.2504	90.323	93.6428	19.5613	21.7253	27.2585	85.6724	80.3699	68.9702	25.8607	27.811	28.7808	6.35744	-1.89125	1.92e-43	6.35744	-1.51061	2.56e-28	6.35744	-0.113193	0.728585	6.35744	0.267417	0.269935	nitrate transmembrane transporters
ATMG00670.1	0.0751341	0.148436	0.385679	0.874692	1.52616	1.35868	0.0780258	0.0845109	0.319676	1.21368	1.26032	0.838276	-0.402893	2.56705	3.39e-06	-0.402893	2.7014	2.72e-05	-0.402893	-0.302317	1	-0.402893	-0.162749	0.992482	unknown protein
AT2G07696.1	0.0751341	0.371089	0.231407	1.43131	1.79548	1.35868	0.234077	0.0845109	0.0799191	1.30704	1.17629	1.86284	-0.583156	2.69701	7.09e-08	-0.583156	3.32212	2.37e-08	-0.583156	-0.711088	0.799255	-0.583156	-0.0790926	1	Ribosomal protein S7p/S5e family protein
AT1G01060.2	15.8533	15.8826	15.5043	1.43131	2.24435	1.9531	6.16404	6.84539	5.83409	2.42736	1.93248	0.931418	5.06523	-3.07204	5.76e-42	5.06523	-1.82157	1.18e-11	5.06523	-1.32588	3.04e-11	5.06523	-0.0757334	1	Homeodomain-like superfamily protein
AT3G47780.1	53.7209	60.1164	61.3229	23.5372	22.8924	21.1444	48.298	48.4248	48.2711	36.8771	35.2048	31.8545	5.41214	-1.3734	3.73e-25	5.41214	-0.479991	0.00152342	5.41214	-0.272583	0.13615	5.41214	0.620796	9.1e-05	ABC2 homolog 6
AT1G78860.1	23.517	25.1598	25.0691	10.3373	9.51604	8.57665	35.5017	26.1984	27.4922	20.1657	17.2243	14.9027	3.50267	-1.373	1.11e-16	3.50267	-0.771221	5.58e-06	3.50267	0.275321	0.234707	3.50267	0.877006	4.32e-06	D-mannose binding lectin protein with Apple-like carbohydrate-binding domain
AT5G50200.1	78.1394	99.4518	104.133	21.8673	23.7901	29.4663	95.1915	87.4688	74.9641	27.9146	30.2476	31.7614	6.46919	-1.9071	2.25e-45	6.46919	-1.51811	1.17e-28	6.46919	-0.128862	0.656641	6.46919	0.260105	0.280531	nitrate transmembrane transporters
AT4G08555.1	29.0769	28.0543	22.6008	7.07706	7.90011	14.351	22.0033	15.0429	16.8629	11.2965	11.5109	7.07878	3.89494	-1.44263	1.07e-06	3.89494	-0.849738	0.0126425	3.89494	-0.56386	0.159883	3.89494	0.028988	1	unknown protein
AT2G32940.1	4.43291	4.97259	4.78242	1.19276	1.34661	1.61343	4.21339	3.1269	3.19676	2.89416	1.68042	1.67655	1.70951	-1.76832	1.9e-10	1.70951	-0.761278	0.0253996	1.70951	-0.424958	0.220351	1.70951	0.581599	0.290223	Argonaute family protein
AT3G21800.1	1.80322	1.63279	2.08267	0.159035	0.44887	0.509504	0.780258	0.92962	1.43854	0	0.0840211	0.186284	-0.637092	-2.2936	7.32e-07	-0.637092	-3.39759	5.27e-06	-0.637092	-0.802463	0.107951	-0.637092	-1.90526	0.17209	UDP-glucosyl transferase 71B8
AT1G73220.1	3.90697	8.16395	11.0304	1.51083	1.43638	2.4626	2.96498	3.38044	3.03693	1.21368	1.34434	1.39713	1.87025	-2.08745	3.71e-07	1.87025	-1.23825	0.0194954	1.87025	-1.29741	0.00387112	1.87025	-0.448298	0.695313	organic cation/carnitine transporter1
ATMG00940.1	0.0751341	0	0	0.31807	0.628418	0.594421	0.0780258	0	0.0799191	0.0933599	0.504126	0.279425	-1.66096	3.88413	0.000864616	-1.66096	2.26403	0.171662	-1.66096	0.863851	1	-1.66096	-0.746608	0.614101	DNA binding
AT3G28380.1	1.35241	1.85544	1.38844	0.238552	0.269322	0.254752	0.390129	0.760598	0.559434	0	0.0840211	0.279425	-0.768402	-2.54979	4.07e-06	-0.768402	-2.14224	0.0216275	-0.768402	-1.42241	0.0101025	-0.768402	-1.01506	0.676994	P-glycoprotein 17
AT1G66960.1	2.55456	2.22653	1.38844	0.159035	0.179548	0.339669	0.468155	0.422555	0.399595	0	0.0840211	0.186284	-1.13424	-3.13597	3.13e-09	-1.13424	-2.13252	0.0590191	-1.13424	-2.23299	7.41e-06	-1.13424	-1.22877	0.627551	Terpenoid cyclases family protein
AT4G24415.2	6.76207	9.203	5.47664	2.06745	2.0648	2.4626	5.53983	3.29593	3.67628	2.8008	2.43661	1.58341	2.4567	-1.69719	3.63e-05	2.4567	-0.873114	0.0899226	2.4567	-0.77426	0.139981	2.4567	0.0496336	1	MIR824a; miRNA
AT4G24415.1	5.40965	6.75382	4.55101	1.59035	1.88525	1.69835	4.36945	2.61984	2.79717	2.24064	2.26857	1.02456	2.11698	-1.68909	1.13e-05	2.11698	-0.816569	0.100019	2.11698	-0.768289	0.113375	2.11698	0.103992	1	MIR824a; miRNA
ATMG01170.1	0.450804	0.593742	0.617086	4.05539	2.87277	3.82128	0.546181	0.591577	0.319676	3.17424	2.68867	3.25996	0.92439	2.67795	5.19e-14	0.92439	2.62009	2.91e-11	0.92439	-0.188605	1	0.92439	-0.24469	0.760424	ATPase, F0 complex, subunit A protein
AT5G44110.3	93.1663	92.6238	80.684	43.2575	34.2936	45.3458	85.9845	74.0316	77.7613	92.7997	69.6535	79.7294	6.20546	-1.1157	2.12e-11	6.20546	0.0258453	1	6.20546	-0.164268	0.635068	6.20546	0.977261	4.43e-08	P-loop containing nucleoside triphosphate hydrolases superfamily protein
AT1G65481.1	0.826475	1.18748	0.925629	0.31807	0.269322	0	0.624207	0.422555	0.799191	0.373439	0.588147	0.372567	-1.07804	-2.25834	0.000674567	-1.07804	-0.452044	0.752547	-1.07804	-0.657497	0.445617	-1.07804	1.14489	0.497942	unknown protein
ATMG01320.1	0.150268	0.222653	0.0771358	1.03373	1.16706	0.93409	0.156052	0.169022	0.239757	0.653519	0.504126	0.372567	-0.759224	2.71126	4.02e-05	-0.759224	1.38704	0.209403	-0.759224	0.302625	1	-0.759224	-1.01766	0.258716	NADH dehydrogenase 2B
AT1G78230.1	4.35778	3.71089	5.01383	1.8289	1.34661	2.29277	3.97932	5.32419	3.11684	1.8672	2.43661	1.21084	3.06272	-1.24628	8.54e-07	3.06272	-1.1475	4.31e-05	3.06272	-0.0785045	1	3.06272	0.019983	1	Outer arm dynein light chain 1 protein
AT1G55120.1	11.2701	10.0936	12.1875	2.46504	3.32164	3.48161	11.8599	11.409	11.4284	1.58712	2.26857	2.2354	2.55806	-1.85877	1.27e-26	2.55806	-2.49878	1.29e-38	2.55806	0.0497535	1	2.55806	-0.590421	0.114914	beta-fructofuranosidase 5
AT2G33710.2	10.8944	10.1678	12.0332	5.32767	4.4887	5.09504	8.89494	10.8174	9.90997	6.53519	5.62941	7.54449	3.10275	-1.14533	1.54e-08	3.10275	-0.589247	0.0124896	3.10275	-0.160678	0.71824	3.10275	0.395297	0.263743	Integrase-type DNA-binding superfamily protein
ATMG00110.1	0.225402	0.0742178	0.0771358	1.19276	1.61593	0.93409	0.312103	0.422555	0.0799191	1.21368	0.504126	1.21084	-0.605237	3.20653	1.71e-06	-0.605237	1.8016	0.0116024	-0.605237	1.04276	0.700806	-0.605237	-0.360587	0.820067	cytochrome C biogenesis 206
AT5G44110.1	102.408	101.678	87.3948	47.3924	37.8846	48.8275	92.8507	79.9473	83.995	99.895	74.8628	85.9699	6.32275	-1.11929	1.58e-11	6.32275	0.0213391	1	6.32275	-0.182691	0.569548	6.32275	0.957919	8.26e-08	P-loop containing nucleoside triphosphate hydrolases superfamily protein
ATMG01370.1	0.150268	0.0742178	0.154272	1.59035	1.79548	2.20785	0.468155	0.338044	0.479515	0.933599	1.42836	2.14226	-0.0714629	3.7847	5.54e-12	-0.0714629	1.77625	0.00082545	-0.0714629	1.69885	0.172	-0.0714629	-0.309467	0.788238	unknown protein
AT1G78850.1	516.096	540.899	601.505	251.593	228.116	239.212	463.005	465.486	511.722	314.996	285.84	296.377	8.69826	-1.2058	1.44e-25	8.69826	-0.682827	2.91e-08	8.69826	-0.203563	0.254733	8.69826	0.319409	0.0435123	D-mannose binding lectin protein with Apple-like carbohydrate-binding domain
ATMG00220.1	0.150268	0.371089	0.462815	1.19276	1.79548	1.01901	0.546181	0.253533	0.319676	1.12032	1.09227	1.02456	-0.077438	1.98911	0.000311256	-0.077438	1.49464	0.0218639	-0.077438	0.195698	1	-0.077438	-0.297054	0.865161	apocytochrome b
ATMG00410.1	0.751341	0.371089	0.385679	4.85057	3.14209	3.73636	1.09236	1.01413	0.399595	3.73439	2.43661	2.79425	1.01944	2.93803	1.13e-12	1.01944	1.82323	3.07e-05	1.01944	0.719179	0.437477	1.01944	-0.394932	0.586436	ATPase subunit 6-1
AT2G07699.1	0.525939	0.371089	0.385679	3.73732	2.33412	2.88719	0.780258	0.845109	0.399595	2.61408	1.76444	1.86284	0.633426	2.78127	8.6e-11	0.633426	1.60821	0.00069723	0.633426	0.642811	0.552396	0.633426	-0.529354	0.42279	pseudogene
AT1G55120.2	11.2701	9.87096	11.956	2.46504	3.23186	3.48161	11.7039	11.1554	11.2686	1.58712	2.18455	1.95598	2.5339	-1.85253	3.3e-26	2.5339	-2.56214	2.4e-39	2.5339	0.0456452	1	2.5339	-0.664126	0.0684963	beta-fructofuranosidase 5
AT4G01870.1	163.041	165.357	172.398	39.0431	37.1664	50.5258	181.488	164.374	165.592	62.3644	69.4854	56.7234	6.91983	-1.98201	5.35e-41	6.91983	-1.43887	6.66e-22	6.91983	0.0304556	1	6.91983	0.573576	0.00180723	tolB protein-related
ATMG00810.1	0.150268	0	0	0.63614	1.16706	0.594421	0.234077	0	0.239757	0.373439	0.588147	0.651993	-1.07588	3.73652	0.000103359	-1.07588	1.67989	0.0854883	-1.07588	1.50702	0.680351	-1.07588	-0.548346	0.81532	DNA/RNA polymerases superfamily protein
AT2G19900.1	2.62969	3.26558	5.70805	1.3518	1.16706	1.78326	3.58919	2.78886	1.99798	3.08088	1.84846	2.42169	1.39711	-1.42129	0.000237104	1.39711	-0.194402	0.867416	1.39711	-0.46543	0.416387	1.39711	0.761059	0.213711	NADP-malic enzyme 1
AT2G07677.1	0.37567	0.148436	0.231407	3.10118	4.03983	4.07603	0.312103	0.338044	0.479515	1.58712	2.35259	1.95598	0.28088	3.83662	4.16e-22	0.28088	2.35832	3.04e-07	0.28088	0.564381	0.890538	0.28088	-0.911977	0.00812911	pseudogene
AT5G44110.2	93.6922	91.9558	77.5986	42.7804	34.563	44.4118	83.7217	73.5245	75.9231	91.0259	67.889	78.9843	6.17725	-1.11165	2.88e-11	6.17725	0.0283284	1	6.17725	-0.174961	0.601418	6.17725	0.965006	7.82e-08	P-loop containing nucleoside triphosphate hydrolases superfamily protein
AT5G10140.1	1.72808	2.00388	2.46835	0.397587	1.16706	0.339669	0.0780258	0	0.319676	0.0933599	0.0840211	0.186284	0.708844	-1.71042	0.000679083	0.708844	-0.150187	1	0.708844	-3.84768	5.18e-10	0.708844	-2.27805	0.0260703	K-box region and MADS-box transcription factor family protein
AT5G39090.1	4.50804	5.04681	6.40227	1.90842	2.60344	2.29277	5.38378	4.56359	5.59434	3.36095	2.68867	4.56395	2.06138	-1.23117	9.8e-07	2.06138	-0.558882	0.0587106	2.06138	-0.0344366	1	2.06138	0.637555	0.104243	HXXXD-type acyl-transferase family protein
AT4G25250.1	42.3756	36.144	43.0418	21.2312	15.9798	17.493	32.8489	30.8465	31.0885	27.2611	24.7022	20.1186	3.34771	-1.14869	5.65e-15	3.34771	-0.394742	0.0278724	3.34771	-0.358438	0.0558478	3.34771	0.395485	0.0608049	Plant invertase/pectin methylesterase inhibitor superfamily protein
AT2G33710.1	15.6279	15.1404	16.6613	7.63368	6.5535	7.55764	12.7182	14.1978	14.1457	8.49575	7.982	9.77989	3.62622	-1.12173	9.46e-10	3.62622	-0.645804	0.00203141	3.62622	-0.208185	0.51061	3.62622	0.267669	0.477872	Integrase-type DNA-binding superfamily protein
AT5G25260.1	1.72808	2.22653	5.47664	0.0795175	0.359096	0.509504	0.312103	0.760598	0.399595	0.560159	0	0	0.0637704	-3.29011	8.25e-07	0.0637704	-1.3739	0.348052	0.0637704	-2.66398	7.83e-05	0.0637704	-0.747509	0.806499	SPFH/Band 7/PHB domain-containing membrane-associated protein family
AT3G54420.1	39.5957	40.5971	43.3503	17.6529	14.2741	21.7388	31.0543	27.128	30.6889	28.1947	22.6857	25.8003	5.59519	-1.20059	1.81e-18	5.59519	-0.215073	0.278417	5.59519	-0.474288	0.00238508	5.59519	0.511201	0.00348924	homolog of carrot EP3-3 chitinase
AT1G50060.1	26.0715	28.7965	25.6862	10.0192	8.70807	10.7845	27.6211	30.0859	23.4962	13.1637	11.7629	16.2067	2.81254	-1.44633	1.91e-19	2.81254	-0.982698	3.05e-09	2.81254	0.0107723	1	2.81254	0.474334	0.0414991	CAP (Cysteine-rich secretory proteins, Antigen 5, and Pathogenesis-related 1 protein) superfamily protein
AT1G62580.1	3.00536	2.5234	3.31684	0.795175	1.16706	1.01901	2.80893	2.36631	2.23773	1.21368	1.68042	1.58341	0.638745	-1.56774	4.31e-07	0.638745	-0.719736	0.0515152	0.638745	-0.249818	0.648758	0.638745	0.597495	0.386397	Flavin-binding monooxygenase family protein
AT4G11590.1	1.05188	1.55857	0.694222	0.397587	0	0.339669	1.48249	1.26766	1.59838	0.28008	0.588147	0.838276	0.613049	-2.08634	0.00071633	0.613049	-1.33349	0.0297035	0.613049	0.390867	0.705114	0.613049	1.13988	0.349308	F-box associated ubiquitination effector family protein
AT2G07695.1	0.225402	0.222653	0.231407	1.3518	1.07729	2.03802	0.390129	0.169022	0.0799191	0.746879	1.00825	2.51483	-0.148377	2.66703	5.74e-06	-0.148377	2.66015	3.26e-05	-0.148377	-0.0716113	1	-0.148377	-0.0747738	1	Cytochrome C oxidase subunit II-like, transmembrane domain
ATMG00730.1	0.150268	0.371089	0.308543	1.51083	1.97503	1.69835	0.390129	0.338044	0.479515	1.77384	1.42836	1.30399	0.194851	2.5943	9.56e-08	0.194851	1.86681	0.000394604	0.194851	0.528697	0.905658	0.194851	-0.197323	0.960445	cytochrome c oxidase subunit 3
AT3G60700.1	4.73345	5.56633	5.01383	0.95421	1.34661	1.61343	1.95065	1.85924	1.91806	0.373439	1.09227	0.931418	1.58062	-1.96873	1.65e-14	1.58062	-1.22906	0.00305157	1.58062	-1.41383	8.17e-09	1.58062	-0.674115	0.330483	Protein of unknown function (DUF1163)
AT1G05230.4	5.71019	4.82415	5.63091	2.22649	1.88525	2.20785	3.43314	3.38044	4.95498	2.42736	2.18455	1.58341	3.49803	-1.34627	6.91e-09	3.49803	-0.921513	0.00106933	3.49803	-0.45461	0.105772	3.49803	-0.0300329	1	homeodomain GLABROUS 2
AT1G05230.2	5.63506	4.82415	5.63091	2.22649	1.88525	2.20785	3.51116	3.38044	5.0349	2.42736	2.18455	1.58341	3.50555	-1.33958	8.68e-09	3.50555	-0.940969	0.000809077	3.50555	-0.428447	0.141666	3.50555	-0.0300205	1	homeodomain GLABROUS 2
AT2G24400.1	3.7567	3.11715	4.24247	1.03373	1.16706	2.12293	2.18472	3.1269	2.23773	2.14728	2.26857	1.02456	0.165631	-1.35773	0.000168608	0.165631	-0.45907	0.376146	0.165631	-0.559359	0.257387	0.165631	0.339001	0.768995	SAUR-like auxin-responsive protein family
AT2G16890.2	26.4472	33.4722	36.6395	6.3614	12.8377	9.76549	29.8059	28.3957	25.9737	14.0973	9.83046	11.7359	4.46079	-1.73919	4.42e-09	4.46079	-1.23947	9.35e-05	4.46079	-0.197851	0.810852	4.46079	0.301802	0.662859	UDP-Glycosyltransferase superfamily protein
AT2G42900.1	2.47942	2.22653	2.23694	1.11324	0.807965	1.01901	1.24841	1.77473	1.19879	0.466799	0.840211	0.558851	1.98786	-1.22385	0.000751815	1.98786	-1.14222	0.0227569	1.98786	-0.720345	0.0984208	1.98786	-0.638697	0.521789	Plant basic secretory protein (BSP) family protein
AT2G31250.1	1.95349	2.0781	2.08267	0.63614	0.628418	0.594421	1.79459	1.85924	0.959029	0.746879	0.75619	0.465709	0.104391	-1.70117	6.66e-05	0.104391	-1.20635	0.0184337	0.104391	-0.406682	0.552192	0.104391	0.0872504	1	Glutamyl-tRNA reductase family protein
AT2G07725.1	0.450804	0.445307	0.385679	2.62408	2.51367	2.29277	1.01434	0.591577	0.799191	1.68048	1.42836	2.14226	0.360566	2.50766	2.13e-11	0.360566	1.09932	0.0113444	0.360566	0.900558	0.217187	0.360566	-0.507264	0.320916	Ribosomal L5P family protein
AT2G07689.1	0.0751341	0.0742178	0	0.95421	0.628418	0.424587	0	0.169022	0.159838	0.466799	0.336084	0.186284	-1.16009	3.50297	0.00073608	-1.16009	1.52238	0.309224	-1.16009	0.97038	0.99185	-1.16009	-1.00543	0.445177	NADH-Ubiquinone/plastoquinone (complex I) protein
AT4G14630.1	14.9517	23.0817	26.9204	3.81684	3.32164	4.58554	25.9826	11.4935	17.6621	8.86919	4.7892	6.14736	3.5374	-2.46584	4.92e-13	3.5374	-1.47946	3.76e-05	3.5374	-0.234997	0.783081	3.5374	0.751155	0.147323	germin-like protein 9
AT1G51880.1	6.68693	7.19912	7.3279	2.54456	3.23186	1.69835	5.38378	6.59185	5.99393	3.17424	3.61291	3.63253	2.48996	-1.50573	3.84e-09	2.48996	-0.781517	0.0071718	2.48996	-0.240618	0.60193	2.48996	0.483337	0.31867	root hair specific 6
AT5G61490.1	2.93023	3.78511	2.85402	0.556622	1.07729	1.01901	2.57485	1.43669	1.35862	0.746879	0.672169	1.02456	1.64264	-1.85656	8.11e-09	1.64264	-1.14183	0.00934113	1.64264	-0.823432	0.0123822	1.64264	-0.109155	1	Uncharacterised conserved protein (UCP012943)
AT1G55120.3	11.0447	9.27722	11.339	2.38552	3.14209	3.39669	11.4698	10.9019	10.3096	1.58712	2.10053	1.86284	2.47446	-1.82893	3.04e-23	2.47446	-2.54516	2.77e-35	2.47446	0.046894	1	2.47446	-0.669502	0.078673	beta-fructofuranosidase 5
AT1G09350.1	3.83184	5.34368	5.24523	1.59035	1.07729	0.93409	3.43314	3.21142	3.59636	1.12032	1.34434	1.02456	2.04612	-1.98439	1.28e-07	2.04612	-1.5404	0.000270029	2.04612	-0.491897	0.349728	2.04612	-0.0483754	1	galactinol synthase 3
AT4G25400.1	20.1359	19.8161	18.3583	7.7132	7.72056	12.6527	12.7182	14.4514	15.4244	9.14927	8.23406	6.05422	3.68626	-1.05364	1.45e-09	3.68626	-0.859188	1.29e-05	3.68626	-0.453579	0.0316749	3.68626	-0.259144	0.484187	basic helix-loop-helix (bHLH) DNA-binding superfamily protein
AT3G48940.1	4.95885	5.4179	4.47388	2.22649	1.07729	2.37768	4.36945	4.31006	5.4345	1.58712	2.68867	1.95598	1.65581	-1.37373	0.000251883	1.65581	-1.16866	0.00450521	1.65581	-0.0732929	1	1.65581	0.131472	1	Remorin family protein
AT2G07698.1	5.03398	4.52728	5.86232	25.207	19.3912	24.0316	6.55417	5.83125	4.87506	16.1513	19.0728	22.4472	3.52311	2.15397	9.25e-27	3.52311	1.73791	5.64e-17	3.52311	0.16374	0.812544	3.52311	-0.252192	0.485068	ATPase, F1 complex, alpha subunit protein
AT2G07727.1	0.150268	0.593742	0.617086	2.62408	2.78299	1.52851	0.546181	0.422555	0.319676	1.49376	1.5964	1.67655	0.486113	2.32562	1.61e-06	0.486113	1.8591	0.00116506	0.486113	-0.0726043	1	0.486113	-0.537252	0.486562	Di-haem cytochrome, transmembrane;Cytochrome b/b6, C-terminal
AT2G07706.1	0.150268	0.148436	0.308543	1.27228	1.7057	1.61343	0.156052	0.253533	0.159838	0.560159	1.17629	1.49027	-0.324657	2.85974	4.48e-08	-0.324657	2.45222	0.000137931	-0.324657	-0.0909704	1	-0.324657	-0.494073	0.508159	unknown protein
AT1G05230.1	5.48479	4.82415	5.55378	2.22649	1.88525	2.20785	3.27708	3.38044	4.79515	2.42736	2.18455	1.49027	3.46549	-1.31909	1.36e-08	3.46549	-0.902845	0.00167671	3.46549	-0.467167	0.0982083	3.46549	-0.0511003	1	homeodomain GLABROUS 2
AT2G34810.1	17.8068	17.5154	17.1241	4.69153	3.77051	4.07603	14.3568	10.1413	13.9858	6.06839	6.3856	7.82391	5.12795	-2.05954	7.04e-14	5.12795	-0.9251	0.00261793	5.12795	-0.445229	0.250271	5.12795	0.689031	0.0895753	FAD-binding Berberine family protein
AT1G05230.3	5.48479	4.6015	5.47664	2.14697	1.88525	2.12293	3.04301	3.21142	4.63531	2.42736	2.18455	1.39713	3.42529	-1.3302	2.55e-08	3.42529	-0.851613	0.0048288	3.42529	-0.512275	0.0677096	3.42529	-0.0338606	1	homeodomain GLABROUS 2
AT1G64910.1	2.93023	3.11715	2.46835	1.03373	0.897739	0.509504	2.57485	1.69022	1.91806	1.12032	0.840211	0.838276	-0.311512	-1.78638	2.03e-07	-0.311512	-1.14469	0.00634259	-0.311512	-0.45577	0.299242	-0.311512	0.185205	1	UDP-Glycosyltransferase superfamily protein
AT3G26220.1	2.25402	1.92966	1.85126	5.56622	5.92508	5.01012	2.4188	2.36631	2.63733	7.93559	4.62116	4.0051	2.58116	1.44556	1.11e-06	2.58116	1.15061	0.000224919	2.58116	0.297307	0.690167	2.58116	0.00254448	1	cytochrome P450, family 71, subfamily B, polypeptide 3
AT3G46400.1	4.80858	4.37885	3.2397	2.22649	1.7057	1.18884	4.29142	3.04239	4.23571	4.29455	3.69693	2.14226	0.76376	-1.26953	0.000372295	0.76376	-0.191318	0.806566	0.76376	-0.101383	1	0.76376	0.976418	0.0358923	Leucine-rich repeat protein kinase family protein
AT1G67980.1	1.95349	1.11327	1.46558	0.159035	0.179548	0.169835	0.546181	0.507066	0.87911	0.466799	0.252063	0.279425	-0.762446	-3.08563	3.97e-07	-0.762446	-0.944735	0.330047	-0.762446	-1.2139	0.0365246	-0.762446	0.922387	0.756674	caffeoyl-CoA 3-O-methyltransferase
AT4G28940.1	91.4382	112.217	125.423	33.5564	38.6028	40.7603	135.531	151.19	162.795	58.63	64.7802	59.6108	6.12445	-1.54337	2.9e-23	6.12445	-1.29587	1.52e-16	6.12445	0.449938	0.0183447	6.12445	0.697417	0.00014043	Phosphorylase superfamily protein
AT1G25053.1	2.62969	2.82027	2.23694	0.715657	0.897739	1.10393	1.95065	1.26766	1.51846	0.840239	0.75619	0.838276	1.10839	-1.49717	2.33e-05	1.10839	-0.960339	0.0520222	1.10839	-0.690348	0.0852403	1.10839	-0.15385	1	pseudogene
AT5G18340.1	0.450804	0.445307	0.462815	1.98794	1.52616	1.86818	0.312103	0.760598	0.719272	1.58712	0.924232	1.86284	0.313753	1.9669	4.89e-05	0.313753	1.27079	0.0245221	0.313753	0.381902	0.836448	0.313753	-0.313242	0.811207	ARM repeat superfamily protein
AT1G58320.1	7.0626	4.6015	6.71081	1.59035	1.34661	2.03802	1.01434	1.85924	2.63733	2.98752	3.52888	2.32855	1.66206	-1.87549	6.55e-10	1.66206	0.687883	0.101868	1.66206	-1.73458	2.01e-08	1.66206	0.828759	0.0830631	PLAC8 family protein
AT2G04040.1	4.43291	4.15619	4.62815	1.59035	1.16706	1.10393	7.33443	7.52147	6.39353	4.01447	3.02476	3.16682	2.32347	-1.76295	0.000262011	2.32347	-1.05685	0.0385735	2.32347	0.683808	0.276661	2.32347	1.3891	0.0192759	MATE efflux family protein
AT4G13510.1	273.864	303.476	316.951	116.493	102.791	121.517	187.496	158.627	166.152	113.152	126.116	109.721	7.99298	-1.39137	6.44e-40	7.99298	-0.553468	2.08e-06	7.99298	-0.803566	1.49e-13	7.99298	0.0343372	1	ammonium transporter 1;1
AT1G06040.1	172.959	152.221	157.048	82.9367	79.809	75.0669	120.784	113.16	114.524	87.7583	89.8185	94.3527	7.15046	-1.01959	3.13e-25	7.15046	-0.35795	0.00198188	7.15046	-0.468523	1.46e-05	7.15046	0.193116	0.238796	B-box zinc finger family protein
AT4G23550.1	18.4078	22.5622	24.992	10.6553	8.6183	11.3789	16.0733	15.8035	18.9408	12.1368	15.3759	14.437	3.97081	-1.102	7.53e-12	3.97081	-0.274918	0.217327	3.97081	-0.375326	0.0633756	3.97081	0.451713	0.0497348	WRKY family transcription factor
AT2G21140.1	1.42755	0.519524	1.54272	0	0.0897739	0.0849173	0.390129	0.422555	1.03895	0.18672	0.168042	0.0931418	3.95492	-4.13825	2.49e-08	3.95492	-1.97101	0.0159172	3.95492	-0.893833	0.13385	3.95492	1.25747	0.845858	proline-rich protein 2
AT4G34131.1	147.113	154.967	153.115	67.5103	68.318	86.4458	123.827	103.441	114.604	72.3539	70.1576	65.7581	6.63462	-1.03413	8.16e-21	6.63462	-0.715167	1.35e-09	6.63462	-0.412671	0.00130331	6.63462	-0.0937136	0.781304	UDP-glucosyl transferase 73B3
AT5G43450.1	5.86046	5.8632	4.39674	1.8289	1.34661	1.52851	4.21339	3.71848	3.51644	4.01447	2.68867	4.0051	3.40879	-1.76458	3.28e-12	3.40879	-0.106166	0.926826	3.40879	-0.49304	0.0941927	3.40879	1.16491	0.000349815	2-oxoglutarate (2OG) and Fe(II)-dependent oxygenase superfamily protein
AT1G06040.2	160.937	143.463	145.941	77.6886	73.6146	70.5663	112.903	106.906	106.772	82.25	83.5169	88.1122	7.05057	-1.02093	8.77e-25	7.05057	-0.363466	0.00188204	7.05057	-0.46344	2.38e-05	7.05057	0.194018	0.243948	B-box zinc finger family protein
AT3G07720.1	87.1555	87.2059	117.632	26.8769	22.5333	25.3054	55.9445	41.4104	33.8058	27.7279	28.2311	27.8494	6.65508	-1.96558	3.08e-13	6.65508	-0.646132	0.0498215	6.65508	-1.15416	8.11e-05	6.65508	0.165267	0.877845	Galactose oxidase/kelch repeat superfamily protein
AT4G40010.1	17.5062	21.7458	18.3583	7.79271	7.63078	7.55764	14.8249	14.8739	17.0228	10.9231	13.2753	11.829	4.5433	-1.32483	2.76e-19	4.5433	-0.372218	0.0387868	4.5433	-0.30227	0.113621	4.5433	0.650268	0.000694656	SNF1-related protein kinase 2.7
AT4G01390.1	20.6619	22.1911	29.0802	5.32767	10.5933	9.25599	58.0512	44.3682	60.0992	10.1762	13.4434	11.7359	4.20867	-1.51645	1.21e-06	4.20867	-2.19879	8.46e-13	4.20867	1.17591	0.000320279	4.20867	0.493453	0.357726	TRAF-like family protein
AT3G08040.1	106.991	100.417	95.6484	53.1177	41.1165	38.2128	91.2902	67.7778	77.8412	71.7004	78.8118	50.576	6.74698	-1.1934	7.1e-09	6.74698	-0.236249	0.457574	6.74698	-0.354998	0.242801	6.74698	0.602139	0.0221311	MATE efflux family protein
AT2G28210.1	5.93559	7.34756	6.63368	0.715657	0.718191	1.18884	5.92996	4.56359	4.87506	1.4004	0.168042	1.21084	2.15715	-2.91162	2.68e-16	2.15715	-2.4854	6.81e-11	2.15715	-0.372091	0.472099	2.15715	0.0532179	1	alpha carbonic anhydrase 2
AT1G24792.1	2.62969	3.04293	2.69975	0.795175	0.987513	1.18884	2.4188	1.26766	1.99798	0.933599	0.75619	0.931418	1.26087	-1.49143	4.02e-06	1.26087	-1.1233	0.00867289	1.26087	-0.547232	0.162589	1.26087	-0.179462	1	pseudogene
AT5G10140.4	1.42755	1.70701	2.08267	0.397587	1.07729	0.254752	0.0780258	0	0.319676	0	0	0.186284	0.520009	-1.60123	0.000880548	0.520009	-1.03772	0.755652	0.520009	-3.5989	1.56e-09	0.520009	-3.0238	0.00632811	K-box region and MADS-box transcription factor family protein
AT3G08040.2	108.494	101.381	97.0368	54.0719	41.2062	39.062	91.8364	68.5384	78.4805	72.0738	80.2401	51.5074	6.75902	-1.19115	9.29e-09	6.75902	-0.228565	0.482985	6.75902	-0.361442	0.233763	6.75902	0.601128	0.0234618	MATE efflux family protein
AT5G43580.1	156.279	164.021	142.778	47.3129	39.321	45.4308	140.368	128.879	123.795	80.1028	65.7045	61.3805	7.22115	-1.80896	2.76e-45	7.22115	-0.924027	4.36e-12	7.22115	-0.236544	0.21352	7.22115	0.648375	1.44e-05	Serine protease inhibitor, potato inhibitor I-type family protein
AT1G61810.3	15.1019	16.031	13.2674	4.13491	3.95005	3.14194	13.0303	9.21169	12.2276	4.29455	5.46137	7.17192	3.08489	-1.98009	5.68e-22	3.08489	-1.02745	3.32e-06	3.08489	-0.363219	0.176151	3.08489	0.589222	0.0689661	beta-glucosidase 45
AT2G07787.1	0.300536	0.296871	0.385679	2.14697	2.69322	1.9531	0.468155	0.338044	0.319676	1.4004	1.68042	1.76969	-0.161603	2.74982	2.71e-10	-0.161603	2.07287	4.62e-05	-0.161603	0.197828	1	-0.161603	-0.477117	0.445177	unknown protein
ATMG01190.1	4.28264	3.78511	5.24523	21.4697	16.8775	20.4651	5.38378	5.57772	4.15579	13.2571	15.6279	19.8392	3.28855	2.14345	5.19e-23	3.28855	1.68692	7.86e-14	3.28855	0.183518	0.803559	3.28855	-0.272879	0.480744	ATP synthase subunit 1
AT2G07687.1	0.0751341	0.371089	0.231407	0.556622	1.16706	1.44359	0.312103	0.422555	0.399595	0.840239	0.924232	1.02456	-0.212586	2.16006	0.000351534	-0.212586	1.27864	0.0722576	-0.212586	0.711481	0.799754	-0.212586	-0.168834	1	Cytochrome c oxidase, subunit III
AT4G15490.1	7.43827	8.16395	7.48217	1.19276	2.78299	2.80227	14.8249	12.7612	12.7871	4.76135	3.36084	3.81881	4.34534	-1.77615	4.29e-10	4.34534	-1.7589	2.05e-11	4.34534	0.805978	0.00391082	4.34534	0.822779	0.0475021	UDP-Glycosyltransferase superfamily protein
ATMG00560.1	0.225402	0.445307	0.308543	2.54456	1.79548	0.93409	0.234077	0.0845109	0.0799191	1.30704	1.51238	1.67655	-0.118006	2.39927	2.18e-06	-0.118006	3.37932	1.22e-07	-0.118006	-1.22355	0.380511	-0.118006	-0.2361	0.913927	Nucleic acid-binding, OB-fold-like protein
AT1G14220.1	12.322	9.94518	11.4932	4.77105	4.03983	5.09504	6.78825	8.95816	10.3895	6.72191	8.15004	7.45135	1.61539	-1.27508	7.71e-10	1.61539	-0.223682	0.492242	1.61539	-0.369927	0.187573	1.61539	0.68135	0.0140958	Ribonuclease T2 family protein
AT5G49480.1	184.379	192.818	203.176	85.0837	81.6045	93.6638	186.248	170.628	176.781	133.038	122.335	126.114	6.95335	-1.15635	1.73e-12	6.95335	-0.484373	0.0117134	6.95335	-0.120999	0.786187	6.95335	0.550967	0.0065946	Ca2+-binding protein 1
AT3G25190.1	451.105	470.169	436.897	128.103	107.908	153.276	255.535	188.206	225.372	159.552	154.179	118.104	8.12799	-1.80257	2.7e-19	8.12799	-0.631735	0.00681261	8.12799	-1.02123	1.96e-06	8.12799	0.149606	0.81479	Vacuolar iron transporter (VIT) family protein
AT4G22640.1	2.62969	2.0781	2.00553	0.63614	0.628418	0.679339	2.02867	2.70435	2.0779	0.840239	1.51238	1.21084	0.0579149	-1.77277	3.09e-05	0.0579149	-0.915116	0.0443997	0.0579149	0.0168035	1	0.0579149	0.873159	0.250298	Bifunctional inhibitor/lipid-transfer protein/seed storage 2S albumin superfamily protein
AT1G13520.1	7.36314	8.90613	10.0277	3.97587	3.50118	5.09504	19.8186	19.522	21.8179	19.4188	19.2408	19.9323	2.94348	-1.0602	8.65e-08	2.94348	-0.0623025	0.913544	2.94348	1.21782	2.33e-14	2.94348	2.21545	1.85e-36	Protein of unknown function (DUF1262)
AT1G53660.1	3.3059	3.48823	2.46835	0.477105	1.79548	0.849173	3.12103	2.70435	2.79717	1.30704	0.672169	1.02456	0.335138	-1.58748	3.03e-05	0.335138	-1.52486	0.000321825	0.335138	-0.103169	1	0.335138	-0.0411327	1	nodulin MtN21 /EamA-like transporter family protein
AT2G18490.1	0.450804	0.0742178	1.0799	1.51083	2.0648	2.03802	1.32644	1.5212	0.799191	2.52072	1.34434	3.16682	0.20451	1.79644	0.000283691	0.20451	0.934797	0.0574558	0.20451	1.17965	0.0782268	0.20451	0.31792	0.783486	C2H2-like zinc finger protein
AT5G25450.1	2.02862	2.82027	3.0083	8.03127	9.06717	8.8314	3.04301	2.95788	3.19676	12.1368	11.931	11.2702	2.24485	1.7174	1.44e-21	2.24485	1.93785	1.46e-30	2.24485	0.228446	0.640041	2.24485	0.449074	0.0141035	Cytochrome bd ubiquinol oxidase, 14kDa subunit
AT5G24160.1	0.826475	1.41014	1.85126	8.11078	9.33649	4.84029	7.49048	5.4087	7.1128	16.7114	10.3346	6.51993	4.7073	2.43978	1.9e-12	4.7073	0.743105	0.0402121	4.7073	2.2871	1.93e-10	4.7073	0.590237	0.197247	squalene monoxygenase 6
AT1G25209.1	2.70483	3.04293	2.69975	0.795175	0.987513	1.18884	2.26275	1.26766	2.0779	0.933599	0.75619	0.931418	1.26249	-1.50439	2.4e-06	1.26249	-1.10338	0.0101509	1.26249	-0.580112	0.122614	1.26249	-0.179456	1	pseudogene
AT5G51520.1	7.36314	5.19524	5.55378	1.98794	1.97503	2.54752	4.05734	5.15517	4.47547	4.10783	4.3691	3.91196	0.896084	-1.47222	3.04e-09	0.896084	-0.139004	0.81304	0.896084	-0.406108	0.20835	0.896084	0.926816	0.00398089	Plant invertase/pectin methylesterase inhibitor superfamily protein
AT1G29670.1	5.40965	5.8632	8.02212	0.95421	1.7057	1.35868	11.5478	8.62012	10.7891	4.57463	5.12529	3.72567	5.84487	-2.26763	5.8e-23	5.84487	-1.20108	6.22e-12	5.84487	0.687244	6.86e-05	5.84487	1.75295	1.43e-10	GDSL-like Lipase/Acylhydrolase superfamily protein
AT4G31970.1	4.73345	1.85544	9.17916	1.27228	0.0897739	0.0849173	1.40446	1.01413	0.319676	0.373439	0	0	1.90437	-3.39601	0.000450824	1.90437	-2.80494	0.0319462	1.90437	-2.51191	0.0199743	1.90437	-1.91932	0.3244	cytochrome P450, family 82, subfamily C, polypeptide 2
AT2G15970.2	328.261	322.402	376.114	155.775	162.311	150.219	222.998	229.025	246.95	119.221	126.452	170.263	7.77523	-1.13257	2.02e-12	7.77523	-0.748998	1.74e-05	7.77523	-0.554774	0.00314006	7.77523	-0.171203	0.639428	cold regulated 413 plasma membrane 1
AT5G25450.2	1.57782	2.5234	2.23694	5.64574	6.73304	6.11405	2.18472	2.19728	2.39757	8.86919	8.40211	8.75533	1.83702	1.53613	1.56e-13	1.83702	1.93429	2.95e-23	1.83702	0.0966351	1	1.83702	0.495039	0.0205538	Cytochrome bd ubiquinol oxidase, 14kDa subunit
AT3G15354.1	22.5402	23.8981	21.7523	11.7686	9.78536	8.66157	13.5765	14.0288	15.7441	12.2301	10.5026	12.0153	4.87886	-1.16992	1.29e-20	4.87886	-0.321807	0.0609291	4.87886	-0.653516	3.37e-07	4.87886	0.194567	0.47831	SPA1-related 3
AT1G68690.1	29.4526	34.2144	32.0885	16.3806	15.6207	12.6527	24.6562	24.8462	21.8179	18.8587	18.8207	17.5107	4.1629	-1.09902	2.23e-25	4.1629	-0.368669	0.00417026	4.1629	-0.425426	0.000171243	4.1629	0.304902	0.0624644	Protein kinase superfamily protein
AT5G63140.1	4.20751	3.63667	3.62538	1.43131	1.16706	2.12293	3.27708	3.46495	3.99595	2.89416	2.94074	2.14226	2.58225	-1.2723	8.46e-06	2.58225	-0.423413	0.247108	2.58225	-0.0951436	0.994656	2.58225	0.753313	0.0798632	purple acid phosphatase 29
ATMG01270.1	0.0751341	0.296871	0.154272	0.874692	1.07729	0.93409	0.156052	0.0845109	0.0799191	0.653519	0.924232	1.1177	-1.05299	2.38	7.47e-05	-1.05299	2.94404	0.000163673	-1.05299	-0.662958	0.891315	-1.05299	-0.0907329	1	mitochondrial ribosomal protein S7
AT5G10140.2	1.57782	1.85544	2.46835	0.397587	1.16706	0.254752	0.0780258	0	0.319676	0.0933599	0	0.186284	0.611702	-1.70622	0.00054244	0.611702	-0.525549	0.965377	0.611702	-3.77597	4.36e-10	0.611702	-2.58516	0.0141174	K-box region and MADS-box transcription factor family protein
AT5G10140.3	1.57782	1.85544	2.39121	0.397587	1.16706	0.254752	0.0780258	0	0.319676	0.0933599	0	0.186284	0.604664	-1.68765	0.00060543	0.604664	-0.525651	0.965318	0.604664	-3.75718	4.91e-10	0.604664	-2.58504	0.013885	K-box region and MADS-box transcription factor family protein
AT1G57590.1	27.7996	27.0895	26.0719	9.62162	11.3115	10.8694	22.9396	24.4237	21.1786	17.1782	12.4351	15.3684	3.18317	-1.34798	8.79e-06	3.18317	-0.60815	0.101868	3.18317	-0.240306	0.732079	3.18317	0.499471	0.314555	Pectinacetylesterase family protein
AT1G24879.1	2.40429	2.30075	1.77412	0.63614	0.807965	0.849173	1.71657	1.18315	1.27871	0.653519	0.504126	0.651993	0.867108	-1.49411	9.17e-05	0.867108	-1.20565	0.0203568	0.867108	-0.625868	0.195516	0.867108	-0.337764	0.930686	pseudogene
AT3G42180.1	8.41502	11.2811	8.79348	3.41925	4.4887	4.9252	12.7962	10.6484	9.59029	7.46879	7.47787	6.05422	2.93106	-1.15453	1.12e-08	2.93106	-0.652062	0.00200455	2.93106	0.213595	0.519685	2.93106	0.715884	0.00621495	Exostosin family protein
AT1G64500.1	8.94096	7.71865	9.10202	4.5325	3.68073	3.31178	4.68155	3.8875	5.27466	5.60159	4.03301	6.51993	4.60749	-1.15299	8.69e-09	4.60749	0.211408	0.538288	4.60749	-0.891114	1.65e-05	4.60749	0.473248	0.142779	Glutaredoxin family protein
AT3G20810.3	1.72808	3.41402	2.23694	19.0047	22.9821	21.3142	4.75958	7.18343	8.7911	16.2446	13.9475	15.089	3.524	3.09188	2.78e-53	3.524	1.12669	1.01e-08	3.524	1.48224	5.18e-10	3.524	-0.482928	0.0336402	2-oxoglutarate (2OG) and Fe(II)-dependent oxygenase superfamily protein
AT1G67980.2	1.65295	0.964831	1.31131	0.159035	0.179548	0.169835	0.546181	0.422555	0.799191	0.373439	0.252063	0.186284	-0.88827	-2.88073	3.17e-06	-0.88827	-1.10167	0.274476	-0.88827	-1.13293	0.0714127	-0.88827	0.641895	0.956968	caffeoyl-CoA 3-O-methyltransferase
AT1G61810.1	16.4544	17.2185	14.8101	4.93008	4.39892	3.9062	15.059	10.5639	14.3055	4.66799	6.04952	7.45135	3.27178	-1.86899	7.72e-20	3.27178	-1.13642	1.66e-07	3.27178	-0.278255	0.36918	3.27178	0.454154	0.207295	beta-glucosidase 45
AT3G12320.1	4.73345	4.52728	5.1681	1.43131	1.52616	1.78326	2.96498	1.69022	1.75822	1.30704	1.34434	1.67655	3.29257	-1.60061	3.47e-07	3.29257	-0.572238	0.255819	3.29257	-1.15971	0.000442095	3.29257	-0.1314	1	unknown protein
AT1G05650.1	29.3023	27.6832	26.5347	5.56622	2.87277	5.85929	17.4778	12.7612	17.1826	9.14927	7.982	7.26506	2.4288	-2.54217	8.14e-06	2.4288	-0.958235	0.175022	2.4288	-0.816005	0.324167	2.4288	0.767769	0.444334	Pectin lyase-like superfamily protein
AT2G15970.1	469.212	456.068	524.061	224.398	220.485	222.144	316.239	320.381	350.685	164.967	176.192	240.492	8.30939	-1.11952	1.79e-13	8.30939	-0.763452	2.77e-06	8.30939	-0.553796	0.00159601	8.30939	-0.197733	0.506994	cold regulated 413 plasma membrane 1
AT3G20810.2	1.95349	3.48823	2.62262	20.7541	23.7901	25.0506	5.1497	7.52147	9.27061	16.9915	14.8717	16.2067	3.67573	3.10245	3.07e-53	3.67573	1.13111	1.4e-08	3.67573	1.43756	1.72e-09	3.67573	-0.533753	0.0175352	2-oxoglutarate (2OG) and Fe(II)-dependent oxygenase superfamily protein
ATMG01090.1	0.826475	0.519524	0.771358	4.5325	4.1296	5.68946	0.312103	0.338044	0.639353	2.8008	3.27682	2.60797	1.52973	2.747	2.03e-18	1.52973	2.72393	1e-11	1.52973	-0.698368	0.528899	1.52973	-0.719129	0.0360122	ATP synthase 9 mitochondrial
AT2G25680.1	9.9177	10.5389	10.5676	4.37346	4.21937	3.99111	5.30576	5.15517	5.91401	3.73439	3.1928	3.44625	3.3955	-1.29888	5.69e-12	3.3955	-0.660584	0.0103846	3.3955	-0.919901	1.95e-06	3.3955	-0.281616	0.586168	molybdate transporter 1
AT2G07733.1	0.826475	0.593742	0.848494	2.14697	1.88525	2.80227	0.702232	1.26766	1.19879	1.21368	1.42836	1.86284	0.375327	1.5825	3.75e-05	0.375327	0.509	0.391565	0.375327	0.471758	0.632157	0.375327	-0.601283	0.305	pseudogene
AT3G20810.1	1.95349	3.78511	2.69975	21.2312	25.5856	25.8149	5.38378	7.6905	9.83005	17.2716	15.2078	17.4175	3.72692	3.09838	1.24e-52	3.72692	1.1226	2.25e-08	3.72692	1.4343	1.34e-09	3.72692	-0.541465	0.0167099	2-oxoglutarate (2OG) and Fe(II)-dependent oxygenase superfamily protein
ATMG00640.1	0.0751341	0	0.308543	1.51083	1.16706	0.849173	0.0780258	0.338044	0	0.653519	0.75619	1.1177	-0.551418	3.13089	5.06e-06	-0.551418	2.54865	0.0024665	-0.551418	0.0914998	1	-0.551418	-0.484912	0.667281	hydrogen ion transporting ATP synthases, rotational mechanism;zinc ion binding
AT1G09560.1	430.368	402.631	582.221	240.779	222.909	241.08	319.672	297.901	256.301	230.786	214.422	248.689	8.80946	-1.00571	2.08e-07	8.80946	-0.332761	0.192515	8.80946	-0.695477	0.0014342	8.80946	-0.0225269	1	germin-like protein 5
AT1G64380.1	14.576	14.1756	12.5731	4.45298	4.66824	6.53863	10.4555	9.12718	9.59029	5.69495	5.46137	5.40223	4.04443	-1.39967	2.15e-13	4.04443	-0.817191	0.000205838	4.04443	-0.501328	0.023412	4.04443	0.0810744	0.996215	Integrase-type DNA-binding superfamily protein
AT5G05250.1	9.09122	6.30851	7.71358	18.289	21.1866	20.55	8.19271	9.04267	7.99191	13.1637	12.4351	11.4564	4.56227	1.37559	0.000216777	4.56227	0.554433	0.266044	4.56227	0.125951	0.997016	4.56227	-0.695132	0.190352	unknown protein
AT5G03495.1	1.20215	1.18748	1.0799	0.159035	0.44887	0.339669	1.40446	0.92962	0.799191	0.373439	0.336084	0.372567	0.649175	-1.86521	0.00071193	0.649175	-1.51503	0.0176608	0.649175	-0.141128	1	0.649175	0.206823	1	RNA-binding (RRM/RBD/RNP motifs) family protein
AT5G02270.2	177.241	177.974	175.098	89.8548	74.1533	91.1163	170.252	147.641	148.33	136.585	125.864	121.736	7.09124	-1.05511	6.52e-15	7.09124	-0.279366	0.110347	7.09124	-0.185708	0.419731	7.09124	0.590034	0.000169801	non-intrinsic ABC protein 9
AT2G45360.1	12.9982	14.5467	7.3279	2.30601	2.78299	3.05702	9.51915	6.25381	6.23369	8.21567	3.69693	5.21594	3.26109	-2.09731	2.25e-12	3.26109	-0.368065	0.41764	3.26109	-0.662677	0.0666502	3.26109	1.06629	0.00596665	Protein of unknown function (DUF1442)
AT2G05300.1	1.50268	2.5234	2.1598	3.57829	4.66824	4.75537	1.79459	1.60571	2.15782	6.53519	5.9655	5.02966	1.51789	1.06449	0.000974249	1.51789	1.64993	1.52e-07	1.51789	-0.15208	0.966927	1.51789	0.433646	0.373156	pseudogene
AT1G19715.1	46.1323	42.0072	46.0501	20.7541	22.623	20.9746	26.4508	25.6068	24.6151	14.0973	12.8552	11.829	5.68859	-1.06107	1.14e-31	5.68859	-0.983218	3.3e-19	5.68859	-0.80678	1.24e-19	5.68859	-0.728917	1.63e-09	Mannose-binding lectin superfamily protein
AT4G11100.2	2.02862	1.55857	1.77412	0.31807	0.359096	0.169835	1.48249	1.26766	1.27871	0.18672	0.168042	0.186284	3.61507	-2.62229	1.81e-09	3.61507	-2.83114	8.48e-07	3.61507	-0.406378	0.450101	3.61507	-0.617079	0.845499	unknown protein
AT1G53680.1	12.6225	11.9491	11.4932	6.3614	4.66824	6.8783	9.28507	7.01441	10.3895	7.18871	6.63766	6.42679	2.0235	-1.00459	1.04e-07	2.0235	-0.400802	0.107514	2.0235	-0.431363	0.0628936	2.0235	0.17237	0.75563	glutathione S-transferase TAU 28
AT5G02270.1	201.209	199.423	198.085	100.431	84.0284	104.278	195.065	166.909	166.471	152.737	140.063	137.85	7.26588	-1.05169	3.56e-14	7.26588	-0.295389	0.0961531	7.26588	-0.18001	0.460519	7.26588	0.576287	0.000387894	non-intrinsic ABC protein 9
AT2G07777.1	0.751341	0.519524	0.694222	3.97587	3.86028	5.17996	0.312103	0.338044	0.639353	2.24064	3.02476	2.60797	1.39698	2.71101	2.25e-16	1.39698	2.58369	8.31e-10	1.39698	-0.592862	0.672107	1.39698	-0.717918	0.0517957	ATP synthase 9 mitochondrial
AT1G27140.1	18.1824	17.4412	20.1324	8.11078	6.37395	9.00124	12.9523	17.4938	12.6272	7.00199	7.47787	9.31418	2.18176	-1.24352	2.08e-10	2.18176	-0.854615	9.5e-05	2.18176	-0.373652	0.164477	2.18176	0.0152051	1	glutathione S-transferase tau 14
AT4G12400.1	20.5867	18.9997	21.5209	72.9175	69.0362	70.821	23.3297	22.9025	24.2954	94.8536	98.3046	76.3763	4.93375	1.79992	1.63e-42	4.93375	1.93402	4.1e-49	4.93375	0.207248	0.388102	4.93375	0.341368	0.046519	stress-inducible protein, putative
AT5G20790.1	3.90697	3.63667	7.79071	1.74938	0.628418	1.86818	9.98731	7.18343	8.87102	2.42736	1.76444	2.70111	3.70514	-1.83055	6.01e-07	3.70514	-1.9193	3.3e-08	3.70514	0.766148	0.0559809	3.70514	0.67672	0.305481	unknown protein
AT1G53625.1	5.48479	5.12103	8.63921	3.81684	2.78299	2.80227	3.35511	2.87337	3.19676	4.29455	3.10878	3.81881	1.54665	-1.02296	7.08e-05	1.54665	0.244251	0.610839	1.54665	-1.02358	0.000147776	1.54665	0.24366	0.741544	unknown protein
AT1G25141.1	2.10375	2.44919	2.00553	0.556622	0.897739	1.01901	1.71657	1.01413	1.19879	0.746879	0.672169	0.651993	0.861003	-1.40845	0.000152715	0.861003	-0.922533	0.115062	0.861003	-0.72827	0.106824	0.861003	-0.242615	0.996985	F-box associated ubiquitination effector family protein
ATMG00690.1	1.20215	0.445307	0.385679	5.72526	6.5535	5.17996	1.63854	0.845109	1.11887	4.76135	5.62941	5.96108	1.1354	3.07915	2.52e-22	1.1354	2.16409	1.33e-12	1.1354	0.822728	0.208523	1.1354	-0.0919073	0.99419	unknown protein
AT3G14540.1	15.1019	11.6522	12.8817	4.5325	5.56598	6.28388	6.71022	9.04267	7.19272	5.97503	6.80571	6.2405	1.72295	-1.27606	2.52e-10	1.72295	-0.265696	0.403652	1.72295	-0.790376	0.000250149	1.72295	0.219944	0.681562	Terpenoid cyclases/Protein prenyltransferases superfamily protein
AT2G43880.1	24.2683	25.7536	22.2151	10.0987	7.36146	13.1622	17.7899	17.4093	14.9449	14.1907	11.5109	10.3387	2.53728	-1.23539	1.73e-09	2.53728	-0.476656	0.0644418	2.53728	-0.526674	0.0361563	2.53728	0.232021	0.621109	Pectin lyase-like superfamily protein
AT1G19715.3	41.8497	38.7417	42.579	18.8456	20.648	18.3421	24.188	23.2405	22.1376	12.2301	12.099	10.4319	5.56036	-1.09147	2.42e-30	5.56036	-0.998936	7e-18	5.56036	-0.82339	2.94e-18	5.56036	-0.730845	1.17e-08	Mannose-binding lectin superfamily protein
AT1G19715.2	44.9302	40.894	44.6616	20.436	21.9048	20.0405	25.6705	24.8462	23.4163	13.2571	12.6872	11.4564	5.65261	-1.06525	1.01e-30	5.65261	-0.982101	2.38e-18	5.65261	-0.81895	1.94e-19	5.65261	-0.735796	2.19e-09	Mannose-binding lectin superfamily protein
AT2G05540.1	7.88908	4.82415	3.85679	0.477105	1.97503	3.14194	1.71657	0.0845109	0.399595	0.373439	0.588147	0.186284	5.6622	-1.57388	3.52e-05	5.6622	-0.92482	0.34341	5.6622	-2.87086	4.77e-12	5.6622	-2.21998	0.000147191	Glycine-rich protein family
AT5G67030.2	87.9069	85.9442	81.5325	39.2021	38.9619	34.5613	44.3187	47.4951	49.2302	34.3564	35.1208	35.8596	7.36389	-1.17962	2.73e-28	7.36389	-0.420805	0.00117585	7.36389	-0.856672	3.66e-15	7.36389	-0.0978574	0.769073	zeaxanthin epoxidase (ZEP) (ABA1)
AT3G54990.1	14.9517	15.8826	17.8184	7.31561	7.98988	6.62355	17.3217	14.5359	16.0637	8.68247	9.83046	12.3879	4.19069	-1.14956	1.01e-13	4.19069	-0.635046	0.000133472	4.19069	-0.0198934	1	4.19069	0.494539	0.0254862	Integrase-type DNA-binding superfamily protein
AT4G12400.2	21.1127	18.9997	22.0608	76.0187	72.1782	73.963	24.5781	23.7476	25.0946	98.0278	101.581	79.0774	4.98639	1.83725	1.43e-41	4.98639	1.92413	1.05e-45	4.98639	0.240357	0.298233	4.98639	0.327254	0.0742676	stress-inducible protein, putative
AT5G44585.1	9.84256	6.82803	6.55654	2.78311	2.96254	1.69835	5.46181	5.66223	7.27264	8.58911	4.95724	5.02966	1.58466	-1.63846	9.32e-06	1.58466	0.0116629	1	1.58466	-0.335917	0.633187	1.58466	1.3139	0.0025357	unknown protein
AT1G66460.1	4.43291	4.08198	5.3995	1.11324	1.7057	1.69835	2.1067	2.78886	1.59838	1.58712	1.42836	1.1177	0.711348	-1.62094	0.000614062	0.711348	-0.64456	0.380143	0.711348	-1.09803	0.0459403	0.711348	-0.121749	1	Protein kinase superfamily protein
AT4G02280.1	31.1055	27.1637	34.5568	11.9276	14.2741	13.1622	32.1466	26.2829	26.5331	12.7903	9.07428	10.525	4.46986	-1.23796	1.03e-08	4.46986	-1.39294	5.83e-10	4.46986	-0.127065	0.856717	4.46986	-0.282081	0.536692	sucrose synthase 3
AT2G07786.1	0.0751341	0.0742178	0.154272	1.51083	1.16706	0.764256	0.390129	0	0.0799191	0.560159	0.924232	1.49027	-0.677622	3.39	6.56e-05	-0.677622	2.54834	0.00240983	-0.677622	0.624424	1	-0.677622	-0.213402	1	pseudogene
AT5G67030.1	92.0392	89.8035	84.5408	40.4744	40.6676	36.4295	45.8012	48.2557	51.4679	36.0369	37.0533	37.1636	7.41863	-1.17985	8.52e-29	7.41863	-0.400101	0.00201342	7.41863	-0.872303	5.53e-16	7.41863	-0.0925581	0.787071	zeaxanthin epoxidase (ZEP) (ABA1)
AT1G26250.1	45.9069	60.4133	52.0667	23.7757	18.7628	13.9264	93.4749	52.1432	68.0911	47.8936	59.739	48.9926	4.79219	-1.4868	1.77e-07	4.79219	-0.448258	0.230449	4.79219	0.432372	0.313348	4.79219	1.47086	1.42e-06	Proline-rich extensin-like family protein
AT1G21140.1	30.3542	29.3902	34.7882	4.21443	3.41141	5.60454	14.2007	11.0709	7.51239	5.97503	5.04126	4.84337	4.36898	-2.83266	1.99e-20	4.36898	-1.04722	0.00298671	4.36898	-1.52647	7.54e-07	4.36898	0.25885	0.793383	Vacuolar iron transporter (VIT) family protein
AT5G54470.1	4.50804	3.63667	4.70528	1.59035	1.07729	1.61343	2.26275	1.60571	1.59838	1.12032	1.17629	1.49027	1.68021	-1.57144	2e-06	1.68021	-0.531932	0.388767	1.68021	-1.22413	0.000397972	1.68021	-0.184633	0.979079	B-box type zinc finger family protein
AT5G25610.1	17.5062	17.4412	30.3915	6.59995	11.8502	12.7376	51.419	41.0723	47.392	16.1513	24.114	16.8587	6.80921	-1.0686	7.28e-05	6.80921	-1.29018	1.02e-06	6.80921	1.09866	5.08e-05	6.80921	0.876982	0.0061061	BURP domain-containing protein
AT5G20420.1	1.80322	1.2617	1.0799	3.73732	3.95005	3.05702	1.01434	0.591577	0.559434	1.68048	1.84846	1.95598	1.04662	1.36488	6.14e-07	1.04662	1.31989	0.00148789	1.04662	-0.920637	0.0767792	1.04662	-0.964289	0.00229399	chromatin remodeling 42
AT2G25150.1	4.35778	5.04681	6.47941	19.5613	11.8502	15.8795	4.60352	12.4231	8.95094	13.6305	30.4996	16.5792	4.39193	1.57375	3.63e-05	4.39193	1.2272	0.00266025	4.39193	0.707154	0.186334	4.39193	0.360628	0.651412	HXXXD-type acyl-transferase family protein
ATMG00516.1	0.0751341	0.0742178	0.154272	1.74938	1.16706	1.35868	0.390129	0	0.0799191	0.653519	0.924232	1.67655	-0.52618	3.70079	4.76e-06	-0.52618	2.67469	0.00105155	-0.52618	0.624732	1	-0.52618	-0.39734	0.84753	NADH dehydrogenase 1C
AT2G28160.1	62.8872	73.1787	70.8878	31.0913	28.0095	33.882	63.435	54.1715	54.8245	38.651	30.5837	34.9282	6.01986	-1.15345	1.44e-16	6.01986	-0.728522	1.48e-06	6.01986	-0.262923	0.193786	6.01986	0.161993	0.613488	FER-like regulator of iron uptake
AT4G11100.1	2.25402	1.55857	1.77412	0.31807	0.44887	0.254752	1.48249	1.26766	1.27871	0.18672	0.168042	0.186284	3.65669	-2.42682	3.75e-09	3.65669	-2.83115	8.34e-07	3.65669	-0.465749	0.33345	3.65669	-0.871185	0.624176	unknown protein
AT2G07707.1	0.225402	0.371089	0.53995	2.94215	3.95005	4.58554	0.234077	0.845109	0.319676	2.334	3.10878	3.35311	0.953189	3.30387	5.91e-15	0.953189	2.64932	5.05e-09	0.953189	0.274873	1	0.953189	-0.377971	0.585197	Plant mitochondrial ATPase, F0 complex, subunit 8 protein
ATMG00480.1	0.225402	0.371089	0.53995	2.94215	3.95005	4.58554	0.234077	0.845109	0.319676	2.334	3.10878	3.35311	0.953189	3.30387	5.91e-15	0.953189	2.64932	5.05e-09	0.953189	0.274873	1	0.953189	-0.377971	0.585194	Plant mitochondrial ATPase, F0 complex, subunit 8 protein
AT1G47890.1	1.50268	1.70701	1.46558	0.238552	0.538644	0.424587	1.87262	1.94375	2.39757	0.373439	0.420105	0.465709	-0.00932361	-1.95436	3.74e-05	-0.00932361	-2.27443	9.06e-07	-0.00932361	0.407658	0.536852	-0.00932361	0.0855657	1	receptor like protein 7
AT1G68530.1	6.46153	5.8632	12.1103	1.90842	3.68073	3.56653	9.98731	7.35245	8.15175	4.76135	6.97375	3.91196	6.57887	-1.42163	9.13e-10	6.57887	-0.696211	0.0048691	6.57887	0.0662073	1	6.57887	0.79137	0.0112991	3-ketoacyl-CoA synthase 6
AT1G14550.1	4.88371	5.34368	6.78795	1.98794	1.07729	1.9531	3.66721	3.04239	2.87709	2.61408	1.76444	1.58341	0.669632	-1.74732	3.15e-06	0.669632	-0.686102	0.177909	0.669632	-0.824239	0.0692483	0.669632	0.23672	0.926594	Peroxidase superfamily protein
AT1G66950.1	9.01609	10.5389	10.1048	2.70359	4.30915	3.22686	4.99365	5.66223	5.75417	2.14728	1.93248	2.04912	1.35429	-1.54099	8.02e-14	1.35429	-1.41728	7.04e-08	1.35429	-0.853929	4.77e-05	1.35429	-0.730228	0.0450261	pleiotropic drug resistance 11
AT1G58270.1	458.092	386.526	474.385	225.512	188.166	209.831	302.818	381.398	342.613	205.952	261.894	223.075	7.68497	-1.08075	4.09e-13	7.68497	-0.571311	0.000607889	7.68497	-0.361299	0.0661839	7.68497	0.148142	0.674616	TRAF-like family protein
AT1G05690.1	2.70483	2.96871	3.08543	0.715657	1.34661	1.35868	2.1067	1.85924	2.63733	0.933599	1.09227	0.931418	1.54749	-1.36366	6.3e-06	1.54749	-1.14837	0.00214617	1.54749	-0.402441	0.329558	1.54749	-0.187488	0.972654	BTB and TAZ domain protein 3
AT1G30700.1	137.195	137.971	167.385	72.7585	66.9714	70.1417	112.045	101.582	111.967	75.5281	76.3751	81.7785	6.88435	-1.07574	5.4e-22	6.88435	-0.4788	0.00014811	6.88435	-0.442394	0.000523932	6.88435	0.154539	0.491962	FAD-binding Berberine family protein
AT3G05400.1	2.25402	1.78123	2.39121	4.93008	7.00237	7.72748	4.68155	3.8875	3.19676	6.72191	7.30983	7.45135	2.75126	1.60721	2.12e-07	2.75126	0.86619	0.0103173	2.75126	0.871757	0.0313647	2.75126	0.130763	0.959901	Major facilitator superfamily protein
AT5G54700.1	1.20215	1.78123	1.92839	0	0	0	0.702232	0.422555	0.559434	0	0.0840211	0.186284	0.967125	-7.36758	3.3e-13	0.967125	-2.51467	0.0104883	0.967125	-1.51979	0.00632582	0.967125	3.21063	0.643228	Ankyrin repeat family protein
AT2G46495.1	5.71019	7.64443	9.87338	3.81684	3.14209	3.48161	5.38378	5.15517	4.87506	4.57463	3.86497	3.07368	2.11558	-1.14702	4.03e-06	2.11558	-0.420067	0.228583	2.11558	-0.58928	0.0460937	2.11558	0.137595	0.945925	RING/U-box superfamily protein
AT3G54990.2	7.66368	9.42565	8.71634	4.69153	4.4887	3.05702	9.051	8.45109	8.47142	4.76135	5.37735	6.2405	3.20444	-1.07329	7e-08	3.20444	-0.6651	0.00248392	3.20444	0.00972794	1	3.20444	0.417767	0.224738	Integrase-type DNA-binding superfamily protein
AT5G25250.1	5.40965	6.82803	8.79348	2.22649	1.61593	2.4626	4.68155	3.8875	4.07587	2.05392	1.68042	1.39713	1.66039	-1.72595	1.9e-12	1.66039	-1.29856	2.06e-05	1.66039	-0.729319	0.0048412	1.66039	-0.302086	0.760696	SPFH/Band 7/PHB domain-containing membrane-associated protein family
AT3G46640.1	26.1467	28.9449	27.0747	69.1802	65.535	63.0936	52.1993	52.9884	53.7855	72.1672	66.7967	68.1798	5.36674	1.26729	3.05e-24	5.36674	0.38158	0.00905146	5.36674	0.95177	2.87e-13	5.36674	0.0660572	0.916799	Homeodomain-like superfamily protein
AT1G68530.2	6.46153	5.71477	11.8789	1.90842	3.41141	3.39669	9.28507	7.26794	7.91199	4.85471	6.3856	3.63253	6.52324	-1.46889	6.64e-11	6.52324	-0.710468	0.00306227	6.52324	0.0295887	1	6.52324	0.787739	0.0106924	3-ketoacyl-CoA synthase 6
AT1G21360.1	10.3685	11.6522	11.2618	5.16864	3.95005	5.43471	8.03666	7.18343	8.95094	4.38791	4.87322	5.1228	3.89269	-1.18757	1.13e-09	3.89269	-0.748308	0.00140147	3.89269	-0.459702	0.0495549	3.89269	-0.0205083	1	glycolipid transfer protein 2
AT2G07811.1	1.05188	0.742178	1.85126	10.4168	10.5933	12.3979	1.56052	1.18315	1.83814	8.40239	8.23406	9.77989	2.73817	3.19286	1.5e-44	2.73817	2.51244	8.32e-27	2.73817	0.340264	0.640464	2.73817	-0.339656	0.233127	pseudogene
AT3G46640.2	27.6493	29.984	27.5375	72.679	67.6895	67.9339	54.1499	54.8476	55.8634	78.3289	73.0143	74.3272	5.43557	1.29005	1.02e-25	5.43557	0.452716	0.00111309	5.43557	0.952384	1.3e-13	5.43557	0.115043	0.703759	Homeodomain-like superfamily protein
AT2G40080.1	28.025	32.2105	31.1629	105.997	92.2876	112.006	61.5624	61.862	67.7714	92.7063	79.1478	108.883	6.44289	1.76322	3.22e-25	6.44289	0.55365	0.0048691	6.44289	1.06459	3.59e-09	6.44289	-0.144971	0.754539	Protein of unknown function (DUF1313)
AT5G48410.1	8.41502	8.38661	10.3362	4.61201	3.68073	4.9252	6.63219	6.00028	5.99393	5.60159	4.87322	4.93652	2.34995	-1.03192	1.99e-06	2.34995	-0.275131	0.424192	2.34995	-0.540596	0.0350324	2.34995	0.216131	0.713129	glutamate receptor 1.3
AT5G03840.1	0.976743	1.18748	0.848494	12.9613	10.9524	10.3599	3.97932	5.07066	3.99595	16.6181	10.1665	7.82391	2.41925	3.49389	7.5e-31	2.41925	1.40612	3.46e-07	2.41925	2.09942	1.44e-09	2.41925	0.0115477	1	PEBP (phosphatidylethanolamine-binding protein) family protein
AT3G46640.3	23.2164	25.6051	23.3721	62.4212	59.6099	56.2153	46.4254	47.5797	48.9904	65.3519	63.6039	63.9884	5.20415	1.30359	2.34e-26	5.20415	0.432089	0.00166644	5.20415	0.985469	6.77e-15	5.20415	0.113965	0.700097	Homeodomain-like superfamily protein
AT1G75900.1	4.95885	4.74994	5.1681	1.90842	3.23186	2.20785	3.27708	3.8875	2.87709	2.05392	2.60465	0.931418	3.41773	-1.02541	7.93e-05	3.41773	-0.823262	0.0126829	3.41773	-0.568217	0.0694912	3.41773	-0.366104	0.534369	GDSL-like Lipase/Acylhydrolase superfamily protein
AT4G25960.1	6.23613	5.26946	8.25353	2.86263	4.21937	2.71735	8.42679	5.83125	6.63328	2.98752	3.86497	2.14226	5.14403	-1.01609	7.55e-07	5.14403	-1.20535	1.1e-08	5.14403	0.0875061	0.942395	5.14403	-0.101903	0.956968	P-glycoprotein 2
AT5G42580.1	17.356	16.3279	24.3749	105.122	54.5826	43.5626	22.4714	40.9878	30.3693	99.9884	97.8845	77.0283	5.20809	1.8079	3.79e-07	5.20809	1.55097	3.16e-05	5.20809	0.692036	0.158265	5.20809	0.435117	0.507429	cytochrome P450, family 705, subfamily A, polypeptide 12
AT1G78440.1	5.86046	5.56633	6.94222	1.51083	1.7057	1.35868	2.57485	1.69022	2.71725	1.21368	0.75619	0.651993	1.04566	-1.99997	6.74e-14	1.04566	-1.41423	0.000370777	1.04566	-1.38496	9.34e-08	1.04566	-0.799172	0.209343	Arabidopsis thaliana gibberellin 2-oxidase 1
AT2G07732.1	0.0751341	0	0	0.397587	0.538644	0.509504	0.156052	0.253533	0.0799191	0.373439	0.252063	0.0931418	2.86591	3.7999	0.000833847	2.86591	0.541154	1	2.86591	2.29455	0.408708	2.86591	-0.966923	0.438267	Ribulose bisphosphate carboxylase large chain, catalytic domain
AT4G27480.1	5.86046	5.26946	5.86232	2.54456	2.33412	2.88719	3.97932	4.90163	5.83409	3.73439	3.52888	2.70111	1.35805	-1.12459	1.16e-06	1.35805	-0.557395	0.0441177	1.35805	-0.208072	0.639289	1.35805	0.358924	0.477926	Core-2/I-branching beta-1,6-N-acetylglucosaminyltransferase family protein
AT5G48400.2	3.38103	3.41402	5.70805	2.06745	1.79548	1.78326	2.26275	2.02826	1.99798	3.08088	1.84846	1.95598	1.49985	-1.13754	0.000321426	1.49985	0.122812	0.978465	1.49985	-0.984546	0.00492624	1.49985	0.275791	0.786968	Glutamate receptor family protein
AT1G20450.1	361.094	390.46	415.299	172.235	186.46	195.14	331.532	286.915	306.969	183.079	180.561	193.549	8.26873	-1.07511	9.33e-11	8.26873	-0.731985	4.57e-05	8.26873	-0.334386	0.153009	8.26873	0.00873365	1	Dehydrin family protein
AT3G05400.2	1.72808	1.33592	1.92839	4.61201	6.10463	7.04814	4.29142	3.38044	2.79717	5.69495	6.55364	6.70621	2.57546	1.82457	3.12e-08	2.57546	0.853663	0.0158687	2.57546	1.06705	0.0100686	2.57546	0.0961466	1	Major facilitator superfamily protein
AT4G01430.2	26.5975	25.3083	28.4631	4.21443	6.1944	8.23698	16.0733	17.2402	12.5473	7.46879	6.88973	8.0102	3.88906	-2.10953	9.69e-21	3.88906	-1.03546	3.82e-05	3.88906	-0.809383	0.000999667	3.88906	0.264587	0.640111	nodulin MtN21 /EamA-like transporter family protein
AT4G27480.2	5.93559	5.56633	6.01659	2.78311	2.4239	2.88719	4.13537	5.23968	6.07385	3.82775	3.52888	3.07368	1.41727	-1.10785	1.05e-06	1.41727	-0.56309	0.0373961	1.41727	-0.182402	0.712161	1.41727	0.362162	0.462863	Core-2/I-branching beta-1,6-N-acetylglucosaminyltransferase family protein
AT3G20340.1	9.99283	7.86708	9.41057	2.38552	1.88525	3.05702	6.39812	3.80299	4.63531	2.42736	2.18455	2.98054	3.06261	-1.88957	1.12e-06	3.06261	-0.967849	0.0428192	3.06261	-0.874834	0.064319	3.06261	0.0467174	1	unknown protein
AT1G20450.2	341.86	367.897	390.693	161.58	175.418	184.695	313.664	271.787	290.266	173.556	170.227	182.558	8.18417	-1.07684	7.45e-11	8.18417	-0.734524	3.97e-05	8.18417	-0.329491	0.159475	8.18417	0.0128216	1	Dehydrin family protein
AT2G07675.1	0.450804	0.519524	0.925629	2.46504	2.4239	3.65144	1.01434	1.18315	0.399595	1.96056	2.35259	3.07368	1.18236	2.15834	3.81e-06	1.18236	1.50066	0.00359875	1.18236	0.447844	0.766174	1.18236	-0.20918	0.939965	Ribosomal protein S12/S23 family protein
ATMG00980.1	0.450804	0.519524	0.925629	2.46504	2.4239	3.65144	1.01434	1.18315	0.399595	1.96056	2.35259	3.07368	1.18236	2.15834	3.81e-06	1.18236	1.50066	0.00359875	1.18236	0.447844	0.766174	1.18236	-0.20918	0.939965	Ribosomal protein S12/S23 family protein
AT5G64700.1	10.8944	12.1717	12.1875	5.40719	3.50118	5.68946	8.42679	6.9299	7.03288	2.8008	2.10053	3.81881	3.16237	-1.26383	1.2e-10	3.16237	-1.36863	9.07e-09	3.16237	-0.652587	0.00249585	3.16237	-0.757382	0.0165724	nodulin MtN21 /EamA-like transporter family protein
AT4G01430.1	38.3184	38.8901	42.5018	6.91802	8.88762	12.5678	23.7198	27.0435	18.3015	10.4563	10.3346	11.177	4.40468	-2.07761	1.23e-22	4.40468	-1.11036	1.51e-06	4.40468	-0.793782	0.000642955	4.40468	0.17341	0.81739	nodulin MtN21 /EamA-like transporter family protein
ATMG00040.1	0.450804	0.66796	0.617086	2.86263	4.03983	3.65144	0.702232	0.338044	0.639353	2.42736	2.52063	3.81881	1.02682	2.57763	1.96e-13	1.02682	2.34594	9.76e-10	1.02682	-0.0349893	1	1.02682	-0.265245	0.683684	ATP synthase subunit C family protein
AT5G24140.1	8.03935	9.87096	11.1847	35.4648	16.6082	19.7008	16.8536	28.6492	24.9348	56.2026	56.8823	28.7808	4.55189	1.30344	9.77e-05	4.55189	1.01065	0.00473051	4.55189	1.27441	0.000397972	4.55189	0.981593	0.011584	squalene monooxygenase 2
AT1G48700.1	1.20215	1.63279	0.694222	2.54456	2.87277	3.14194	1.32644	0.422555	1.03895	2.14728	2.26857	3.25996	0.368882	1.2636	0.000439737	0.368882	1.43236	0.000333327	0.368882	-0.327308	0.805293	0.368882	-0.157794	0.952947	2-oxoglutarate (2OG) and Fe(II)-dependent oxygenase superfamily protein
AT5G41590.1	5.55992	5.71477	4.85955	2.62408	2.87277	2.54752	5.22773	3.80299	4.63531	3.82775	3.69693	3.53939	2.18633	-1.00411	3.94e-05	2.18633	-0.307528	0.389294	2.18633	-0.23626	0.576971	2.18633	0.460149	0.276224	Protein of unknown function (DUF567)
ATMG01080.1	1.65295	1.92966	2.1598	13.0409	12.5684	15.37	2.02867	2.19728	2.63733	10.7364	9.99851	14.1576	3.01421	2.82992	6.46e-30	3.01421	2.33889	3.16e-20	3.01421	0.256907	0.749027	3.01421	-0.233791	0.630708	mitochondrial F0-ATPase subunit 9
AT4G19970.1	2.93023	2.82027	4.55101	1.3518	1.7057	1.52851	3.82327	2.95788	4.23571	1.4004	1.34434	1.21084	1.50738	-1.16459	0.000343958	1.50738	-1.47263	1.56e-05	1.50738	0.102327	1	1.50738	-0.206059	0.940516	unknown protein
AT3G45080.1	1.42755	2.0781	3.39397	5.24815	4.4887	4.4157	2.65288	2.95788	2.79717	4.38791	4.95724	5.02966	1.80549	1.03961	0.000341623	1.80549	0.773556	0.0158948	1.80549	0.286969	0.652974	1.80549	0.0210264	1	P-loop containing nucleoside triphosphate hydrolases superfamily protein
AT3G17790.1	13.7495	9.49987	13.4988	29.5805	21.9946	35.0709	29.0256	22.3954	33.2463	31.4623	31.844	37.0704	5.12753	1.23782	9.63e-07	5.12753	0.244793	0.538553	5.12753	1.2044	5.39e-06	5.12753	0.211353	0.735856	purple acid phosphatase 17
AT3G09800.1	9.54203	9.57409	7.55931	3.73732	4.21937	5.01012	7.10035	7.52147	5.99393	5.60159	3.78095	3.07368	2.74249	-1.04207	1.3e-06	2.74249	-0.727404	0.00488994	2.74249	-0.373226	0.198141	2.74249	-0.0586244	1	SNARE-like superfamily protein
AT2G20800.1	0.225402	0.66796	0.154272	1.59035	1.88525	1.78326	1.71657	3.63397	0.87911	5.41487	5.79745	3.07368	0.346273	2.28489	0.000195388	0.346273	1.20201	0.024748	0.346273	2.52358	4.16e-05	0.346273	1.43977	0.00989796	NAD(P)H dehydrogenase B4
AT5G42590.1	58.9051	46.683	58.0832	163.249	100.457	93.3241	50.6388	84.5109	67.0521	161.979	169.807	133.007	5.74784	1.1255	4.59e-06	5.74784	1.20108	2.09e-06	5.74784	0.30467	0.470795	5.74784	0.380257	0.344753	cytochrome P450, family 71, subfamily A, polypeptide 16
AT2G07779.1	0.150268	0.222653	0.154272	1.59035	1.7057	0.849173	0.0780258	0.0845109	0.319676	0.933599	0.588147	1.30399	-0.531314	2.90261	1.03e-05	-0.531314	2.45871	0.00153764	-0.531314	-0.118765	1	-0.531314	-0.55747	0.611189	unknown protein
AT1G51420.1	72.9552	73.4756	70.1164	31.648	32.5879	34.901	80.4446	75.3838	76.8022	48.0803	40.9183	37.3499	5.55693	-1.12722	1.42e-18	5.55693	-0.8809	2.97e-11	5.55693	0.103422	0.747696	5.55693	0.349717	0.0557679	sucrose-phosphatase 1
AT2G35140.1	4.35778	3.3398	3.39397	9.70113	7.72056	7.38781	5.38378	4.31006	3.51644	8.77583	8.90623	7.45135	2.11664	1.16253	2.22e-08	2.11664	0.925851	2.18e-05	2.11664	0.253276	0.584831	2.11664	0.0166894	1	DCD (Development and Cell Death) domain protein
AT4G08570.1	19.9105	22.6364	22.2922	3.10118	5.65576	6.02913	18.8042	23.9166	19.6601	1.4004	2.7727	4.84337	3.50704	-2.13449	1.16e-11	3.50704	-2.78696	4.03e-17	3.50704	-0.056117	1	3.50704	-0.708687	0.17292	Heavy metal transport/detoxification superfamily protein
AT3G53960.1	3.5313	3.04293	4.55101	10.2578	13.1968	8.06715	1.79459	1.85924	3.11684	6.44183	7.64592	5.86793	3.09724	1.49991	7.8e-09	3.09724	1.55611	2.76e-07	3.09724	-0.710974	0.0748913	3.09724	-0.654369	0.0492211	Major facilitator superfamily protein
AT3G13680.1	0	0	0.0771358	1.3518	1.25684	1.69835	0	0.169022	0.239757	1.30704	1.68042	1.67655	-0.285762	5.36337	2.4e-10	-0.285762	3.43165	1.13e-07	-0.285762	2.04812	0.573815	-0.285762	0.115615	1	F-box and associated interaction domains-containing protein
AT4G29610.1	0.826475	0.816395	0.694222	2.54456	1.52616	3.14194	1.48249	2.11277	0.799191	2.8008	1.93248	2.04912	0.898843	1.61704	0.00049715	0.898843	0.625232	0.291043	0.898843	0.895528	0.194969	0.898843	-0.0961941	1	Cytidine/deoxycytidylate deaminase family protein
AT2G35140.2	4.35778	3.26558	3.31684	9.70113	7.72056	7.30289	5.38378	4.22555	3.51644	8.68247	8.90623	7.45135	2.10928	1.17734	1.47e-08	2.10928	0.929549	2.01e-05	2.10928	0.26405	0.554125	2.10928	0.0163443	1	DCD (Development and Cell Death) domain protein
AT1G52560.1	3.15563	4.67572	4.93669	1.03373	1.79548	2.29277	1.24841	1.60571	1.59838	1.30704	2.52063	1.76969	0.776781	-1.31991	0.000407649	0.776781	0.339838	0.664339	0.776781	-1.51556	9.06e-05	0.776781	0.144391	1	HSP20-like chaperones superfamily protein
AT5G15725.1	1.80322	1.48436	1.23417	0.238552	0.0897739	0.764256	1.32644	0.92962	1.11887	0.18672	0.504126	0.0931418	-1.02867	-2.01381	0.000158635	-1.02867	-2.02654	0.00281228	-1.02867	-0.415804	0.636784	-1.02867	-0.429834	0.906143	unknown protein
AT3G53980.2	113.678	115.854	150.029	284.752	298.947	284.218	135.843	143.584	138.74	204.271	193.837	159.552	8.03683	1.19322	1.94e-10	8.03683	0.415356	0.0760421	8.03683	0.139787	0.78338	8.03683	-0.638077	0.0048306	Bifunctional inhibitor/lipid-transfer protein/seed storage 2S albumin superfamily protein
AT3G53980.1	137.12	141.311	180.806	335.166	357.21	347.991	162.762	174.769	166.551	247.124	235.259	188.053	8.33268	1.17977	1.01e-09	8.33268	0.411495	0.089743	8.33268	0.134442	0.810243	8.33268	-0.633832	0.00706353	Bifunctional inhibitor/lipid-transfer protein/seed storage 2S albumin superfamily protein
AT4G23700.1	54.7727	63.1593	84.3094	26.3203	24.5981	25.4752	40.4174	34.903	47.6318	13.5372	12.3511	12.1084	4.99362	-1.40369	8.53e-15	4.99362	-1.69406	1.38e-18	4.99362	-0.717255	0.000387079	4.99362	-1.00763	2.43e-06	cation/H+ exchanger 17
AT2G28100.1	20.1359	23.8239	18.5897	8.98548	9.87513	8.91632	16.7756	17.9163	18.3015	7.56215	7.39385	8.94161	4.14124	-1.17362	2.19e-24	4.14124	-1.15015	1.63e-19	4.14124	-0.240955	0.093981	4.14124	-0.217523	0.427978	alpha-L-fucosidase 1
AT2G07671.1	1.20215	1.55857	2.08267	12.3252	10.324	13.4169	1.87262	1.69022	2.63733	9.61607	9.5784	12.2016	2.89809	2.89237	3.62e-26	2.89809	2.33095	4.31e-17	2.89809	0.359164	0.646603	2.89809	-0.201904	0.764491	ATP synthase subunit C family protein
AT2G35140.3	4.35778	3.41402	3.39397	9.86017	7.98988	7.47272	5.38378	4.22555	3.59636	8.86919	8.90623	7.45135	2.12062	1.18215	4.52e-09	2.12062	0.93126	1.42e-05	2.12062	0.243442	0.604167	2.12062	-0.00735876	1	DCD (Development and Cell Death) domain protein
AT2G07674.1	0.150268	0.371089	0.308543	2.06745	2.0648	1.10393	0.234077	0.422555	0.239757	0.560159	0.840211	1.21084	0.254184	2.6148	1.56e-07	0.254184	1.52044	0.0311847	0.254184	0.0950714	1	0.254184	-0.996548	0.0844885	Unknown conserved protein
AT3G07920.1	0.225402	0	0	0.715657	0.718191	1.01901	0.0780258	0	0	1.21368	0.588147	0.558851	-1.4806	3.27546	8.06e-05	-1.4806	4.39925	3.27e-05	-1.4806	-1.21741	0.947397	-1.4806	-0.0640166	1	Translation initiation factor IF2/IF5
AT2G07708.1	0.450804	0.66796	0.53995	2.30601	2.33412	2.03802	0.624207	0.676087	0.559434	0.746879	1.5964	1.49027	0.239877	1.98866	8.88e-07	0.239877	1.0427	0.0743671	0.239877	0.159065	1	0.239877	-0.785729	0.118754	unknown protein
AT2G45560.1	16.83	20.1872	18.8211	7.79271	6.73304	7.55764	21.6912	20.4516	22.3773	9.52271	11.1748	10.1525	5.19961	-1.33505	2.31e-15	5.19961	-1.06208	3.13e-10	5.19961	0.208671	0.432105	5.19961	0.481532	0.0548799	cytochrome P450, family 76, subfamily C, polypeptide 1
AT3G14810.1	29.9785	30.9488	34.634	11.6096	10.5036	10.3599	13.8886	12.3386	15.1047	3.17424	3.78095	4.19138	4.63144	-1.55458	7.38e-27	4.63144	-1.88805	3.05e-24	4.63144	-1.20715	4.8e-17	4.63144	-1.54056	9.04e-15	mechanosensitive channel of small conductance-like 5
AT5G53830.1	2.85509	3.63667	3.16257	8.1903	9.78536	8.57665	8.50481	7.18343	7.75215	10.643	9.83046	8.0102	2.47251	1.45273	2.19e-15	2.47251	0.279764	0.205562	2.47251	1.27843	3.02e-11	2.47251	0.105418	0.877978	VQ motif-containing protein
AT4G29770.2	0	0	0	1.74938	1.07729	1.9531	0	0	0.0799191	1.96056	1.26032	1.76969	-0.535734	7.33578	1.46e-12	-0.535734	5.47208	1.12e-10	-0.535734	1.91033	1	-0.535734	0.0487555	1	unknown protein
AT4G33070.1	39.3703	46.8314	48.3641	10.5758	15.4411	18.2572	48.454	32.1987	31.8078	10.8297	10.2506	24.5894	4.39323	-1.60445	1.03e-09	4.39323	-1.30209	2.83e-06	4.39323	-0.258401	0.620905	4.39323	0.0439199	1	Thiamine pyrophosphate dependent pyruvate decarboxylase family protein
AT3G27620.1	0.225402	0.148436	0.0771358	0.63614	1.97503	1.27376	0.156052	0.422555	0.319676	2.05392	1.93248	0.745135	-0.171223	3.0045	4.49e-06	-0.171223	2.37466	0.000132995	-0.171223	0.931569	0.742448	-0.171223	0.303139	0.883218	alternative oxidase 1C
AT5G51920.1	2.17889	2.59762	3.31684	5.24815	6.73304	5.77438	3.90129	5.07066	4.07587	6.62855	6.46962	4.19138	1.9273	1.12906	5.74e-06	1.9273	0.411307	0.186204	1.9273	0.685939	0.0303302	1.9273	-0.0317998	1	Pyridoxal phosphate (PLP)-dependent transferases superfamily protein
AT1G77080.3	4.95885	4.97259	3.93392	1.98794	2.33412	2.20785	4.44747	3.80299	3.59636	0.840239	1.17629	1.86284	2.10703	-1.08771	3.62e-05	2.10703	-1.60767	1.56e-07	2.10703	-0.226266	0.650214	2.10703	-0.746299	0.133769	K-box region and MADS-box transcription factor family protein
AT3G29810.1	5.10912	6.38273	6.78795	26.9564	27.2913	25.5601	9.83125	9.63425	8.7911	36.6904	33.8605	34.0899	3.62743	2.12483	1.01e-21	3.62743	1.88748	7.07e-18	3.62743	0.627897	0.0376784	3.62743	0.390591	0.232945	COBRA-like protein 2 precursor
AT3G14810.2	29.152	30.8004	34.7111	11.6891	10.1445	10.6147	12.8743	12.0851	14.1457	3.08088	3.69693	4.09824	4.60112	-1.54161	3.47e-25	4.60112	-1.84304	7.54e-22	4.60112	-1.27381	7.99e-18	4.60112	-1.57518	7.79e-15	mechanosensitive channel of small conductance-like 5
AT3G03470.1	7.73881	7.1249	6.40227	15.983	13.7354	15.37	5.61786	5.83125	6.55336	8.30903	9.5784	9.59361	4.38017	1.08401	6.34e-10	4.38017	0.610486	0.00555258	4.38017	-0.24061	0.50456	4.38017	-0.714011	0.000349645	cytochrome P450, family 87, subfamily A, polypeptide 9
AT2G27550.1	14.576	12.0233	11.2618	83.6524	83.9386	67.1696	59.3777	80.877	52.2671	103.629	96.7082	83.6414	6.31748	2.63131	5.67e-22	6.31748	0.56095	0.0911062	6.31748	2.34495	1.97e-17	6.31748	0.274578	0.640951	centroradialis
AT4G29770.1	0	0	0	1.8289	1.07729	1.9531	0	0	0.0799191	1.96056	1.26032	1.76969	-0.51509	7.36019	7.82e-13	-0.51509	5.47195	9.18e-11	-0.51509	1.91034	1	-0.51509	0.0242396	1	unknown protein
AT3G21000.1	0.300536	0.445307	0.617086	2.14697	1.7057	2.29277	0.702232	0.0845109	0.559434	1.77384	2.68867	2.14226	-0.538367	2.15619	1.24e-06	-0.538367	2.25086	4.98e-07	-0.538367	0.0104844	1	-0.538367	0.106726	1	Gag-Pol-related retrotransposon family protein
AT1G17460.2	4.13237	3.04293	3.54825	8.98548	10.7729	7.81239	4.44747	4.31006	5.35458	7.37543	9.41036	9.03476	2.67201	1.35766	1.41e-12	2.67201	0.87171	1.79e-05	2.67201	0.396857	0.208627	2.67201	-0.0890134	0.921146	TRF-like 3
AT2G41810.1	5.40965	5.19524	3.2397	0.238552	0.179548	0.339669	2.49683	1.26766	2.15782	1.77384	2.26857	0.745135	0.157953	-4.13498	8.82e-15	0.157953	-0.300551	0.753889	0.157953	-1.21723	0.0131726	0.157953	2.61294	0.000215716	Protein of unknown function, DUF642
AT2G39310.1	607.835	687.034	780.923	3024.84	2838.38	2321.55	1582.29	1912.31	1796.18	2965.76	3153.14	3572.92	9.90328	1.97928	4.12e-23	9.90328	0.873289	5.97e-05	9.90328	1.34981	5.63e-11	9.90328	0.243819	0.546637	jacalin-related lectin 22
AT2G39310.3	592.658	667.663	758.013	2951.05	2757.94	2273.83	1537.97	1861.94	1748.71	2892.94	3066.35	3468.79	9.86576	1.98373	2.16e-23	9.86576	0.872779	5.57e-05	9.86576	1.35101	4.35e-11	9.86576	0.240058	0.553526	jacalin-related lectin 22
AT2G39310.2	545.248	615.562	700.239	2701.37	2547.51	2112.32	1423.11	1716.67	1617.56	2679.24	2834.95	3227.46	9.75449	1.98382	4.46e-23	9.75449	0.87775	5.76e-05	9.75449	1.35403	5.65e-11	9.75449	0.247959	0.537295	jacalin-related lectin 22
AT1G17460.1	4.13237	3.11715	3.77965	9.14451	11.132	8.49173	4.5255	4.39457	5.51442	7.46879	9.74644	9.1279	2.71418	1.3787	3.89e-13	2.71418	0.868452	2.17e-05	2.71418	0.389251	0.223078	2.71418	-0.12091	0.842862	TRF-like 3
AT1G69710.1	1.65295	1.78123	1.31131	3.6578	3.86028	2.37768	2.02867	2.02826	2.15782	3.54767	3.10878	2.98054	0.693974	1.05274	0.000772741	0.693974	0.628952	0.0882233	0.693974	0.385118	0.561325	0.693974	-0.0385446	1	Regulator of chromosome condensation (RCC1) family with FYVE zinc finger domain
AT3G21890.1	2.40429	2.37497	2.85402	0.238552	0.897739	0.764256	0.546181	1.01413	0.719272	0.28008	0.168042	0.465709	1.6206	-2.01316	1.36e-06	1.6206	-1.29971	0.104857	1.6206	-1.73909	3.66e-05	1.6206	-1.02501	0.319664	B-box type zinc finger family protein
AT3G27870.1	15.6279	16.2537	13.2674	6.3614	6.73304	6.28388	9.59718	9.63425	7.59231	4.85471	4.62116	5.1228	3.4806	-1.22106	1.94e-16	3.4806	-0.877419	2.28e-06	3.4806	-0.752255	5.75e-07	3.4806	-0.408623	0.139175	ATPase E1-E2 type family protein / haloacid dehalogenase-like hydrolase family protein
AT3G50970.1	237.799	246.922	265.656	72.7585	78.0135	92.39	228.928	195.981	238.638	67.5925	59.991	71.3466	7.12384	-1.62574	2.91e-33	7.12384	-1.7384	8.16e-37	7.12384	-0.177275	0.460693	7.12384	-0.289943	0.176057	dehydrin family protein
AT5G13320.1	0.976743	0.816395	3.31684	0.0795175	0.269322	0	0.546181	0.338044	0	1.77384	2.7727	1.21084	0.34143	-3.78976	0.000216899	0.34143	2.66006	0.00887312	0.34143	-2.48741	0.0202888	0.34143	3.95577	0.000741659	Auxin-responsive GH3 family protein
AT2G16586.1	51.9176	44.6791	34.7111	103.293	91.8387	73.7931	34.3314	32.9593	28.3713	84.3973	79.736	80.8471	5.79186	1.03404	4.02e-09	5.79186	1.35629	2.84e-14	5.79186	-0.457076	0.0465523	5.79186	-0.134804	0.792987	unknown protein
AT1G35330.1	5.55992	4.82415	6.63368	12.4842	10.8626	11.294	7.17838	7.85952	9.43045	11.1098	12.1831	13.133	2.66878	1.02743	7.18e-08	2.66878	0.573724	0.00630504	2.66878	0.524575	0.0328746	2.66878	0.070888	0.985354	RING/U-box superfamily protein
AT4G34881.1	329.763	289.449	251.848	139.156	117.155	143.935	230.956	223.278	269.088	93.4532	90.1546	125.276	7.83771	-1.12165	9.69e-14	7.83771	-1.22789	1.22e-15	7.83771	-0.26812	0.234158	7.83771	-0.374362	0.0778992	unknown protein
AT2G07688.1	0.0751341	0.148436	0.462815	1.43131	2.24435	2.29277	0.390129	0.338044	0.239757	0.840239	1.17629	1.39713	0.920403	3.07118	2.32e-10	0.920403	1.78546	0.00262529	0.920403	0.493195	0.977329	0.920403	-0.79037	0.148008	pseudogene
AT1G71280.1	0.450804	0.593742	0.617086	1.3518	1.52616	2.71735	0.312103	0.0845109	0.399595	1.30704	1.68042	1.30399	-0.0317383	1.73179	5.99e-05	-0.0317383	2.37283	2.29e-05	-0.0317383	-1.01579	0.321697	-0.0317383	-0.371196	0.658295	DEA(D/H)-box RNA helicase family protein
ATMG01010.1	0.150268	0.222653	0.231407	1.59035	0.987513	0.594421	0.234077	0.338044	0.159838	0.373439	0.420105	0.931418	-0.254553	2.34875	0.00015639	-0.254553	1.20047	0.18543	-0.254553	0.256652	1	-0.254553	-0.888646	0.319666	Unknown conserved protein
AT5G41050.1	2.40429	3.3398	2.54548	1.11324	1.34661	0.764256	2.18472	2.78886	3.03693	1.21368	1.17629	2.2354	2.45818	-1.36122	7.31e-06	2.45818	-0.796058	0.022874	2.45818	-0.0539576	1	2.45818	0.510575	0.449378	Pollen Ole e 1 allergen and extensin family protein
AT1G56300.1	18.7835	17.2185	16.7385	57.0936	55.3007	61.65	33.0829	34.3114	33.4861	48.7338	49.4884	54.3017	5.19581	1.72185	3.34e-43	5.19581	0.596172	8.54e-06	5.19581	0.934925	4.01e-12	5.19581	-0.190751	0.373156	Chaperone DnaJ-domain superfamily protein
AT5G23840.1	29.4526	29.984	32.7056	135.895	76.3078	71.2456	47.2836	49.5234	52.5868	152.177	150.062	130.771	5.99577	1.6215	2.45e-13	5.99577	1.53514	9.79e-12	5.99577	0.697068	0.00936191	5.99577	0.610707	0.0319259	MD-2-related lipid recognition domain-containing protein
AT4G23680.1	85.6528	95.5925	115.935	223.603	250.2	292.285	205.364	228.602	218.099	249.738	268.867	311.187	7.17789	1.36611	3.11e-12	7.17789	0.347733	0.180308	7.17789	1.13364	3.04e-08	7.17789	0.115263	0.882608	Polyketide cyclase/dehydrase and lipid transport superfamily protein
AT5G65870.1	7.58854	8.46082	9.25629	3.02166	4.21937	4.9252	5.92996	6.42283	5.67425	6.16175	5.62941	6.61307	3.33872	-1.05899	2.39e-05	3.33872	0.0289143	1	3.33872	-0.48905	0.128234	3.33872	0.598758	0.0977604	phytosulfokine 5 precursor
AT5G23840.2	24.4186	25.3825	28.0774	115.539	64.2781	58.9326	40.1053	42.7625	45.1543	128.37	127.628	111.863	5.75204	1.61667	1.53e-13	5.75204	1.52263	7.66e-12	5.75204	0.71695	0.00633104	5.75204	0.622916	0.0246122	MD-2-related lipid recognition domain-containing protein
AT3G21420.1	6.98747	6.30851	6.71081	13.4385	13.8252	14.9454	11.5478	12.9302	9.59029	17.8317	17.1403	17.6038	3.69684	1.0757	5.03e-13	3.69684	0.626961	2.39e-05	3.69684	0.765332	3.17e-06	3.69684	0.316589	0.0959887	2-oxoglutarate (2OG) and Fe(II)-dependent oxygenase superfamily protein
AT2G29220.1	1.20215	0.445307	2.08267	0	0	0.0849173	0	0	0	0	0.0840211	0	-1.72054	-5.03479	1.01e-05	-1.72054	1.92699	1	-1.72054	-7.00291	3.04e-06	-1.72054	0.0584517	1	Concanavalin A-like lectin protein kinase family protein
AT5G20860.1	3.15563	3.56245	3.16257	8.26982	8.07965	6.79339	10.6895	10.5639	11.6682	7.28207	7.81396	9.22104	2.41021	1.22522	2.74e-06	2.41021	-0.437292	0.148721	2.41021	1.73305	4.74e-12	2.41021	0.0704414	1	Plant invertase/pectin methylesterase inhibitor superfamily
AT3G26450.1	79.2665	87.4285	99.3509	194.42	187.268	232.249	8.58284	8.70463	11.1887	10.643	10.4186	9.1279	6.61334	1.20641	1.34e-10	6.61334	0.0843741	0.934897	6.61334	-3.22212	1.89e-57	6.61334	-4.34399	7.53e-98	Polyketide cyclase/dehydrase and lipid transport superfamily protein
AT2G21640.1	1.95349	3.19136	3.0083	5.48671	7.90011	5.68946	4.13537	5.66223	2.47749	17.1782	17.4764	11.7359	2.62681	1.2207	0.000200877	2.62681	1.91959	2.23e-10	2.62681	0.585266	0.223406	2.62681	1.28417	6.45e-05	unknown protein
AT1G17665.1	3.15563	4.37885	3.93392	7.31561	8.07965	7.89731	6.00799	5.49321	5.51442	10.1762	6.80571	7.3582	2.52287	1.01883	1.33e-05	2.52287	0.511515	0.0579315	2.52287	0.56845	0.0666838	2.52287	0.0611486	1	unknown protein
AT1G52560.2	2.77996	3.93354	4.62815	0.95421	1.7057	2.37768	1.17039	1.35217	1.27871	1.30704	2.10053	1.58341	0.645071	-1.17383	0.000772182	0.645071	0.400144	0.535947	0.645071	-1.5705	1.85e-05	0.645071	0.0038126	1	HSP20-like chaperones superfamily protein
AT5G06980.4	8.71555	8.90613	8.02212	3.26022	2.33412	2.88719	5.92996	3.46495	4.71523	2.98752	3.02476	2.98054	3.84792	-1.58699	1.07e-11	3.84792	-0.652987	0.0372767	3.84792	-0.855656	0.000405849	3.84792	0.0782379	1	unknown protein
AT5G49780.1	7.0626	10.3163	9.71911	3.81684	4.57847	3.65144	5.38378	6.50734	6.55336	2.98752	3.61291	4.19138	2.20398	-1.17034	9.29e-07	2.20398	-0.77001	0.00751314	2.20398	-0.555472	0.0524766	2.20398	-0.155199	0.905633	Leucine-rich repeat protein kinase family protein
AT2G38255.1	0.300536	0	0	0.63614	0.897739	0.849173	0	0.338044	0.239757	0.933599	0.75619	0.745135	-0.839672	2.85427	0.000236637	-0.839672	2.04246	0.00906096	-0.839672	0.845295	0.892467	-0.839672	0.0358692	1	Protein of Unknown Function (DUF239)
AT3G18610.1	3.60644	3.48823	3.47111	12.3252	15.9798	16.5589	5.1497	6.59185	6.63328	15.2177	14.7877	13.133	2.61991	2.08102	2.46e-23	2.61991	1.23195	5.84e-09	2.61991	0.794798	0.00372113	2.61991	-0.0542198	1	nucleolin like 2
AT4G27310.1	15.1019	12.9139	12.8045	7.55416	5.29666	3.65144	11.7039	9.46522	9.67021	9.14927	7.89798	7.54449	4.75528	-1.30077	5.92e-07	4.75528	-0.32754	0.397313	4.75528	-0.403464	0.283477	4.75528	0.56967	0.145424	B-box type zinc finger family protein
AT1G77080.2	27.1234	28.7965	28.0774	11.7686	13.8252	13.2471	22.2374	22.3109	24.0556	11.5766	11.0908	11.4564	4.59923	-1.11507	6.81e-22	4.59923	-1.00781	1.87e-15	4.59923	-0.291838	0.0385099	4.59923	-0.184604	0.483627	K-box region and MADS-box transcription factor family protein
AT3G20940.1	31.2558	28.5738	29.543	82.3006	60.2383	47.3839	29.4938	38.537	32.8467	102.976	97.4644	73.6752	4.47799	1.08773	2.96e-06	4.47799	1.44241	6.27e-10	4.47799	0.174244	0.776401	4.47799	0.52893	0.0912825	cytochrome P450, family 705, subfamily A, polypeptide 30
AT1G70720.1	0.0751341	0.0742178	0.385679	1.98794	1.16706	0.424587	0.702232	0.422555	0.479515	3.45431	2.94074	2.79425	0.431127	2.70337	2e-05	0.431127	2.4871	1.43e-07	0.431127	1.55558	0.142404	0.431127	1.33898	0.00746923	Plant invertase/pectin methylesterase inhibitor superfamily protein
AT1G60630.1	0.601073	0.742178	0.848494	1.98794	1.25684	2.12293	1.32644	1.60571	1.99798	1.12032	1.68042	2.51483	1.41791	1.29191	0.000937242	1.41791	0.107466	1	1.41791	1.15932	0.0099528	1.41791	-0.0253078	1	Leucine-rich repeat protein kinase family protein
AT2G13580.1	4.43291	5.49211	4.85955	15.2674	12.5684	9.93533	3.35511	4.14104	4.07587	12.0434	14.3676	14.7164	2.61443	1.353	8.81e-11	2.61443	1.82934	2.1e-17	2.61443	-0.355071	0.356884	2.61443	0.12145	0.877845	pseudogene
AT2G16430.2	49.5134	56.2571	51.4496	25.9227	25.3162	27.1735	48.8442	41.2413	41.9575	28.008	27.979	31.4819	5.87828	-1.00329	5.75e-13	5.87828	-0.594924	0.000121173	5.87828	-0.251342	0.214992	5.87828	0.157009	0.634043	purple acid phosphatase 10
AT1G77080.4	30.9552	32.8042	30.5458	11.7686	14.1843	13.6717	25.0463	24.9307	25.7339	11.7633	11.1748	11.2702	4.72941	-1.25406	7.22e-31	4.72941	-1.14624	4.09e-22	4.72941	-0.316861	0.0106323	4.72941	-0.209075	0.363942	K-box region and MADS-box transcription factor family protein
AT3G27025.1	0.300536	0.296871	0.462815	0.715657	1.88525	1.52851	0.156052	0.253533	0.479515	0.373439	1.00825	0.558851	0.0635804	1.91945	0.000294083	0.0635804	1.12262	0.181586	0.0635804	-0.243914	0.995826	0.0635804	-1.03786	0.107758	unknown protein
AT3G54500.4	50.1144	43.3432	38.0279	15.4264	13.1968	13.2471	16.3074	16.3951	16.0637	13.9106	15.1238	17.6969	6.09941	-1.64886	1.17e-24	6.09941	-0.0618056	0.945835	6.09941	-1.43065	7e-19	6.09941	0.156403	0.738059	unknown protein
AT4G12290.1	0.676207	0.593742	0.694222	3.89636	4.1296	1.52851	2.7309	1.09864	1.75822	6.53519	4.70518	3.72567	3.99232	2.26552	9.55e-08	3.99232	1.40737	0.000272037	3.99232	1.50343	0.00423487	3.99232	0.645133	0.218448	Copper amine oxidase family protein
AT1G05880.1	0.901609	0.66796	1.92839	0.0795175	0.0897739	0.169835	0.234077	0.169022	0	0.373439	0.0840211	0	-1.48294	-3.25713	0.000309221	-1.48294	0.15141	1	-1.48294	-3.0241	0.0016027	-1.48294	0.384465	1	RING/U-box superfamily protein
AT1G05880.2	0.901609	0.66796	1.92839	0.0795175	0.0897739	0.169835	0.234077	0.169022	0	0.373439	0.0840211	0	-1.48294	-3.25713	0.000309086	-1.48294	0.15141	1	-1.48294	-3.02409	0.00160228	-1.48294	0.384464	1	RING/U-box superfamily protein
AT1G49880.1	1.57782	1.18748	1.23417	3.02166	2.78299	3.05702	1.71657	2.19728	1.51846	3.36095	2.94074	3.35311	1.62448	1.14343	0.00010061	1.62448	0.827902	0.00877758	1.62448	0.433366	0.439519	1.62448	0.117976	0.981838	Erv1/Alr family protein
AT1G37150.3	0.826475	1.03905	0.308543	1.59035	1.88525	3.14194	0.546181	0.253533	0.559434	1.49376	1.93248	1.02456	-0.194487	1.58382	0.000607375	-0.194487	1.68576	0.00439952	-0.194487	-0.662041	0.60717	-0.194487	-0.558151	0.451889	holocarboxylase synthetase 2
AT2G45560.2	6.76207	9.35144	8.02212	3.49877	3.95005	2.88719	9.051	8.28207	9.03086	5.22815	4.53714	5.02966	4.03209	-1.22386	1.28e-08	4.03209	-0.835449	0.000159227	4.03209	0.127652	0.823171	4.03209	0.515862	0.132007	cytochrome P450, family 76, subfamily C, polypeptide 1
AT2G15880.1	9.76743	6.30851	4.47388	17.1758	15.8002	13.7566	2.96498	2.11277	3.11684	4.48127	7.89798	8.84847	4.43682	1.18358	3.46e-05	4.43682	1.36821	5.35e-05	4.43682	-1.32108	9.29e-05	4.43682	-1.13607	0.000410263	Leucine-rich repeat (LRR) family protein
AT5G48570.1	11.3452	12.1717	11.6475	68.3055	69.6646	63.5182	14.2787	13.0992	14.0658	96.0673	98.6407	82.1511	4.69334	2.51733	1.24e-60	4.69334	2.73864	2.73e-72	4.69334	0.237343	0.414017	4.69334	0.458701	0.0108258	FKBP-type peptidyl-prolyl cis-trans isomerase family protein
AT2G46250.1	1.50268	1.41014	1.85126	4.61201	4.21937	4.16095	1.79459	1.01413	1.83814	2.89416	2.85672	2.79425	3.69961	1.44633	3.11e-09	3.69961	0.864554	0.00631507	3.69961	-0.0233387	1	3.69961	-0.604672	0.0459804	myosin heavy chain-related
AT2G16430.1	47.1091	53.7337	48.3641	24.5709	23.8799	25.8149	46.1133	39.3821	40.1993	27.3544	26.2146	30.1779	5.8071	-1.00618	6.61e-13	5.8071	-0.586828	0.000169368	5.8071	-0.24699	0.229587	5.8071	0.172343	0.571284	purple acid phosphatase 10
AT1G77080.5	25.3953	27.2379	24.6835	9.93969	11.8502	11.7186	20.3647	20.4516	20.8589	10.3629	9.74644	9.22104	4.4851	-1.20944	2.46e-26	4.4851	-1.07165	1.36e-17	4.4851	-0.32633	0.0123939	4.4851	-0.188571	0.473995	K-box region and MADS-box transcription factor family protein
AT5G09540.1	2.93023	2.82027	3.31684	7.87223	5.56598	6.02913	2.96498	2.45082	3.7562	6.44183	6.21756	4.37767	1.81051	1.10517	1.44e-05	1.81051	0.890244	0.00192829	1.81051	0.0204082	1	1.81051	-0.194342	0.77517	Chaperone DnaJ-domain superfamily protein
AT5G02180.1	1.65295	1.78123	1.77412	5.24815	2.78299	2.88719	1.56052	1.09864	1.6783	2.70744	4.11703	5.49537	2.7219	1.07442	0.000674841	2.7219	1.49415	3.41e-06	2.7219	-0.256929	0.812544	2.7219	0.163225	0.877845	Transmembrane amino acid transporter family protein
AT3G44326.1	19.9857	20.5583	25.7634	53.7538	39.2312	44.8363	16.7756	23.6631	24.9348	40.8916	45.7075	42.9384	4.86309	1.05683	1.27e-10	4.86309	0.987692	8.77e-09	4.86309	-0.021011	1	4.86309	-0.0901204	0.902574	F-box family protein
AT5G64940.1	56.4257	49.5032	51.5267	27.513	26.3935	23.6919	30.0399	28.2267	29.8897	31.9291	30.5837	29.8054	7.44883	-1.01992	7.55e-24	7.44883	0.0658865	0.80008	7.44883	-0.836071	3.31e-16	7.44883	0.249736	0.120358	ABC2 homolog 13
AT5G14650.1	4.35778	8.01552	8.48494	2.22649	2.33412	2.63244	7.5685	9.46522	5.11482	2.61408	3.61291	5.68165	1.64153	-1.53231	2.58e-05	1.64153	-0.893357	0.0274297	1.64153	0.0855085	1	1.64153	0.72413	0.200354	Pectin lyase-like superfamily protein
AT1G71695.1	9.54203	9.49987	9.02489	21.5492	18.7628	17.5779	18.024	18.3389	16.0637	25.954	28.3151	27.6631	6.09135	1.04529	1.65e-14	6.09135	0.644961	9.86e-07	6.09135	0.899974	1.98e-10	6.09135	0.499625	0.000508948	Peroxidase superfamily protein
AT4G31950.1	3.00536	0.816395	7.94499	0	0.179548	0.0849173	1.40446	0.507066	0.159838	0.373439	0.252063	0	1.33917	-5.36234	1.37e-06	1.33917	-1.67752	0.237092	1.33917	-2.48389	0.0230166	1.33917	1.19032	0.845858	cytochrome P450, family 82, subfamily C, polypeptide 3
AT5G08600.2	4.50804	4.37885	4.3196	12.0867	13.2865	12.9074	3.90129	3.63397	3.67628	14.9376	15.7119	11.7359	2.762	1.53179	2.53e-19	2.762	1.91715	1.82e-27	2.762	-0.234917	0.604167	2.762	0.150632	0.686893	U3 ribonucleoprotein (Utp) family protein
AT5G12110.1	14.9517	15.2146	15.8128	42.2238	42.2835	45.176	13.0303	13.0147	12.2276	49.8542	49.4884	45.4532	4.75401	1.49548	1.18e-30	4.75401	1.91912	2.4e-47	4.75401	-0.264442	0.233221	4.75401	0.159252	0.52142	Glutathione S-transferase, C-terminal-like;Translation elongation factor EF1B/ribosomal protein S6
AT5G64940.2	54.8479	48.0931	50.1383	27.0359	25.5856	22.4182	28.6355	27.7196	29.3303	31.0888	29.5754	28.5014	7.39732	-1.0274	8.16e-24	7.39732	0.0569813	0.852369	7.39732	-0.836594	5.6e-16	7.39732	0.247789	0.130771	ABC2 homolog 13
AT1G37150.1	0.751341	1.03905	0.308543	1.51083	1.88525	3.05702	0.468155	0.253533	0.559434	1.4004	1.93248	0.931418	-0.239953	1.59708	0.000626914	-0.239953	1.71103	0.00444911	-0.239953	-0.69715	0.592329	-0.239953	-0.581101	0.439004	holocarboxylase synthetase 2
AT5G06980.3	9.16636	8.83191	8.4078	3.49877	2.60344	2.97211	5.92996	3.54946	5.0349	2.98752	3.10878	2.98054	3.85901	-1.53264	4.15e-11	3.85901	-0.679351	0.0281352	3.85901	-0.857367	0.000465785	3.85901	-0.00416483	1	unknown protein
AT3G45070.1	22.3148	27.0895	29.9287	57.1731	49.4654	64.2824	18.5701	24.0856	21.4982	30.9955	42.0946	39.399	5.45213	1.10755	9.63e-10	5.45213	0.811486	5.3e-05	5.45213	-0.306915	0.289383	5.45213	-0.602946	0.00609469	P-loop containing nucleoside triphosphate hydrolases superfamily protein
AT4G34830.1	12.6977	9.72253	7.86785	5.88429	4.75802	3.56653	9.83125	8.02854	10.7891	5.88167	4.62116	7.45135	5.82816	-1.08628	1.35e-09	5.82816	-0.683276	0.000601336	5.82816	-0.0790258	0.926653	5.82816	0.323858	0.336621	Pentatricopeptide repeat (PPR) superfamily protein
AT5G03050.1	4.88371	4.37885	4.78242	1.51083	2.15457	2.63244	3.35511	3.04239	3.83612	2.98752	2.26857	1.76969	2.05619	-1.16026	1.52e-05	2.05619	-0.54364	0.138075	2.05619	-0.453546	0.183616	2.05619	0.162899	0.95856	unknown protein
AT3G55330.1	2.77996	2.22653	1.54272	1.11324	0.897739	0.764256	2.18472	1.35217	3.19676	0.933599	1.00825	0.838276	5.23439	-1.22624	0.000223346	5.23439	-1.2715	0.000450231	5.23439	0.04561	1	5.23439	-0.000248758	1	PsbP-like protein 1
AT5G17460.1	96.0965	98.9323	111.924	31.3299	37.8846	50.2711	87.1548	78.6797	85.4335	31.7424	35.877	40.3304	6.06786	-1.36146	2.14e-14	6.06786	-1.21873	4.34e-11	6.06786	-0.288597	0.292123	6.06786	-0.145881	0.785088	unknown protein
AT1G64590.1	52.5939	61.3781	62.7885	153.707	113.295	120.073	27.231	26.0294	37.8816	72.7273	84.2731	83.1756	6.05997	1.13106	1.16e-10	6.05997	1.39739	1e-14	6.05997	-0.954985	4.55e-07	6.05997	-0.688618	0.000727891	NAD(P)-binding Rossmann-fold superfamily protein
AT5G08600.1	4.80858	4.74994	4.47388	13.1204	13.7354	14.351	3.97932	4.14104	3.7562	15.311	16.3001	12.6673	2.85608	1.55097	1.32e-21	2.85608	1.89897	5.7e-29	2.85608	-0.241427	0.537788	2.85608	0.106756	0.842848	U3 ribonucleoprotein (Utp) family protein
AT5G65140.1	4.65831	4.15619	5.78518	2.14697	2.78299	1.86818	9.28507	7.85952	10.3096	7.37543	6.80571	4.47081	2.76184	-1.10298	0.000122902	2.76184	-0.556245	0.0425953	2.76184	0.912443	0.00034819	2.76184	1.45872	4.9e-07	Haloacid dehalogenase-like hydrolase (HAD) superfamily protein
AT2G35820.1	0.37567	0.519524	0.308543	1.27228	1.43638	1.52851	0.780258	1.01413	0.399595	1.12032	1.34434	2.60797	2.89039	1.78285	0.000157312	2.89039	1.19757	0.00616461	2.89039	0.837521	0.291149	2.89039	0.252497	0.811268	ureidoglycolate hydrolases
AT5G23990.1	99.7781	102.198	88.629	17.4938	18.7628	14.6907	56.3346	46.143	67.2919	23.8068	19.745	17.3244	6.73226	-2.51143	1.2e-12	6.73226	-1.47934	8.49e-05	6.73226	-0.775291	0.088068	6.73226	0.25676	0.81471	ferric reduction oxidase 5
AT1G65970.1	121.943	87.7996	96.2655	334.132	235.297	275.896	85.7504	102.343	91.9869	297.818	227.529	425.658	6.65618	1.46592	4.62e-07	6.65618	1.76348	2.77e-09	6.65618	-0.127779	0.943175	6.65618	0.169792	0.877978	thioredoxin-dependent peroxidase 2
AT1G60740.1	44.1037	34.7339	37.1794	101.385	80.7965	85.0872	36.9062	38.875	33.8857	92.7063	74.1906	130.678	5.24155	1.20404	5.8e-10	5.24155	1.43951	2.52e-13	5.24155	-0.0813322	0.962639	5.24155	0.154147	0.777239	Thioredoxin superfamily protein
AT1G14687.1	1.20215	1.2617	1.0799	3.97587	3.59096	4.07603	1.95065	1.60571	1.83814	3.45431	3.02476	4.28452	1.25151	1.70814	6.39e-09	1.25151	0.98452	0.00247513	1.25151	0.603842	0.242426	1.25151	-0.119572	0.975942	homeobox protein 32
AT5G06980.1	10.5188	10.2421	9.10202	4.05539	2.69322	3.22686	6.55417	4.05652	5.67425	3.26759	3.69693	3.53939	4.02576	-1.57211	2.46e-12	4.02576	-0.633704	0.0341761	4.02576	-0.869645	0.000214538	4.02576	0.0686702	1	unknown protein
AT2G38870.1	60.1824	61.675	64.4855	25.7637	24.239	26.5791	70.8474	64.3973	65.1341	67.5925	51.3369	71.0672	6.64907	-1.28229	3.2e-11	6.64907	-0.0774471	0.909739	6.64907	0.104878	0.886343	6.64907	1.30969	1.12e-10	Serine protease inhibitor, potato inhibitor I-type family protein
AT3G54500.3	57.1019	49.2806	43.8903	17.8119	16.5184	15.1153	18.6482	18.0853	17.822	16.338	17.5604	20.0255	6.27647	-1.60252	8.26e-25	6.27647	-0.0172055	1	6.27647	-1.46134	9.7e-21	6.27647	0.123979	0.824369	unknown protein
AT3G54500.1	56.7262	48.9837	43.5817	17.1758	16.2491	14.8605	18.4141	18.0008	18.0617	16.0579	17.2243	19.7461	6.27398	-1.62748	1.39e-25	6.27398	-0.039299	1	6.27398	-1.45399	1.13e-20	6.27398	0.134193	0.791194	unknown protein
AT5G26920.2	7.66368	7.79286	15.6586	1.59035	1.88525	0.849173	1.24841	1.18315	1.19879	0.746879	1.34434	1.02456	1.85517	-2.8395	2.32e-07	1.85517	-0.213011	0.967515	1.85517	-3.08848	8.19e-08	1.85517	-0.461543	0.806925	Cam-binding protein 60-like G
AT4G22217.1	3.3059	2.37497	3.2397	0.397587	0.0897739	0.424587	1.79459	2.78886	3.19676	0.18672	0.336084	0.186284	-0.402812	-3.22304	9.51e-13	-0.402812	-3.37665	4.02e-11	-0.402812	-0.19837	0.882163	-0.402812	-0.354287	0.978892	Arabidopsis defensin-like protein
AT5G01600.1	261.692	238.907	201.402	64.7272	62.752	91.9655	164.01	148.148	147.211	72.5406	78.3076	80.102	7.42549	-1.67748	5.13e-08	7.42549	-0.991969	0.00393634	7.42549	-0.611782	0.146686	7.42549	0.0737254	1	ferretin 1
ATMG01000.1	0.525939	0.519524	0.385679	2.46504	1.79548	1.78326	0.780258	0.760598	0.319676	1.12032	1.51238	1.21084	0.693244	2.058	3.94e-05	0.693244	1.04165	0.117106	0.693244	0.367482	0.856717	0.693244	-0.647849	0.392847	unknown protein
AT4G26050.1	1.95349	1.63279	1.15704	0.397587	0.179548	0.169835	1.09236	1.01413	0.959029	0.933599	1.00825	1.1177	-0.00109331	-2.59777	3.41e-07	-0.00109331	-0.00398541	1	-0.00109331	-0.626692	0.26745	-0.00109331	1.96343	0.00308663	plant intracellular ras group-related LRR 8
AT1G03940.1	5.25939	6.23429	7.71358	16.5396	16.2491	16.2192	7.41245	8.95816	7.1128	19.979	16.7202	19.0009	3.52603	1.352	3.85e-19	3.52603	1.24551	1.01e-16	3.52603	0.288606	0.284372	3.52603	0.18217	0.493355	HXXXD-type acyl-transferase family protein
AT4G04810.1	13.6744	12.6912	11.956	24.5709	25.4958	29.0417	10.3774	7.52147	8.3915	23.62	20.7532	16.4861	4.16547	1.04457	1.84e-10	4.16547	1.20761	9.45e-12	4.16547	-0.54078	0.0127918	4.16547	-0.377654	0.0979983	methionine sulfoxide reductase B4
AT5G26920.1	8.11448	8.60926	16.1985	1.74938	2.24435	0.93409	1.40446	1.26766	1.35862	0.746879	1.34434	1.30399	1.94329	-2.73446	5.86e-07	1.94329	-0.242506	0.94566	1.94329	-3.0198	1.24e-07	1.94329	-0.527421	0.751417	Cam-binding protein 60-like G
AT1G13510.1	7.13774	10.4647	11.339	3.49877	2.4239	3.39669	5.61786	5.32419	7.03288	3.36095	4.11703	3.25996	2.76634	-1.62515	2.04e-12	2.76634	-0.738088	0.0107015	2.76634	-0.684713	0.00780012	2.76634	0.202204	0.833141	Protein of unknown function (DUF1262)
AT5G24280.1	2.70483	2.59762	2.39121	12.2457	11.4911	11.294	3.19906	4.6481	3.03693	11.9501	12.4351	8.47591	3.44533	2.18257	5.35e-25	3.44533	1.59947	8.12e-14	3.44533	0.492632	0.178876	3.44533	-0.0903182	0.952959	gamma-irradiation and mitomycin c induced 1
AT3G29680.1	3.23077	3.56245	3.2397	7.63368	8.6183	8.23698	3.35511	3.46495	3.99595	4.38791	6.63766	5.58851	2.44302	1.28246	2.85e-10	2.44302	0.623955	0.0155948	2.44302	0.107737	0.954866	2.44302	-0.550601	0.0273078	HXXXD-type acyl-transferase family protein
AT1G48800.1	1.42755	1.48436	2.00553	0.31807	0.269322	0.679339	0.702232	1.18315	0.319676	0.0933599	0.168042	0.279425	-0.317399	-1.92907	0.000313895	-0.317399	-1.95674	0.029468	-0.317399	-1.15638	0.0549691	-0.317399	-1.18364	0.404761	Terpenoid cyclases/Protein prenyltransferases superfamily protein
AT4G21490.1	0.150268	0.148436	0.154272	0.715657	1.25684	0.849173	0.858284	0.676087	0.0799191	1.77384	2.60465	0.931418	-0.815768	2.5539	0.000628263	-0.815768	1.70672	0.00892204	-0.815768	1.76934	0.117671	-0.815768	0.921341	0.275081	NAD(P)H dehydrogenase B3
AT1G33840.1	3.38103	3.93354	1.54272	0.715657	0.44887	0.679339	6.16404	3.04239	4.71523	1.8672	1.09227	0.838276	0.788267	-2.24096	0.000348527	0.788267	-1.86932	0.00315897	0.788267	0.650885	0.481375	0.788267	1.02086	0.369589	Protein of unknown function (DUF567)
AT2G07774.1	0.225402	0	0.0771358	0.63614	0.987513	1.27376	0.312103	0.0845109	0.159838	0.18672	0.336084	0.651993	-0.665413	3.13196	1.29e-05	-0.665413	1.01055	0.338381	-0.665413	0.842591	0.89362	-0.665413	-1.27566	0.117977	unknown protein
AT2G21660.2	918.138	906.718	890.301	1642.43	1734.16	2083.28	1253.41	1273.07	1282.14	1455.85	1449.87	1445.75	9.76485	1.00782	6.94e-08	9.76485	0.192233	0.52498	9.76485	0.488227	0.0366909	9.76485	-0.327359	0.268586	cold, circadian rhythm, and rna binding 2
AT1G48070.1	1.80322	2.30075	1.38844	0.63614	0.987513	0.254752	1.63854	1.69022	1.6783	1.21368	0.504126	0.931418	-0.655017	-1.5475	0.000761716	-0.655017	-0.926877	0.0805324	-0.655017	-0.135734	1	-0.655017	0.483786	0.712005	Thioredoxin superfamily protein
AT2G42720.1	2.62969	2.44919	2.93116	4.77105	5.02734	6.28388	2.4188	3.29593	2.55741	7.46879	6.04952	4.47081	1.17376	1.00309	0.000104382	1.17376	1.12221	2.72e-05	1.17376	0.0430547	1	1.17376	0.162337	0.843061	FBD, F-box, Skp2-like and Leucine Rich Repeat domains containing protein
AT2G07678.1	0	0	0.0771358	0.63614	0.538644	1.27376	0.0780258	0.0845109	0.159838	0.373439	0.504126	0.279425	-1.48055	4.55668	4.5e-06	-1.48055	1.75723	0.15469	-1.48055	1.74904	0.754389	-1.48055	-1.04918	0.265763	unknown protein
AT5G56600.1	5.03398	5.93742	5.70805	11.212	13.7354	11.4638	6.08601	7.52147	7.1128	11.0165	13.0233	14.437	3.93968	1.12219	1.1e-10	3.93968	0.89451	6.38e-07	3.93968	0.310263	0.283477	3.93968	0.082627	0.942152	profilin 3
AT3G54500.2	51.8425	45.9408	40.7277	16.0625	14.9922	14.351	16.9316	15.8035	16.3035	15.5911	16.9723	18.1627	6.16277	-1.60789	1.16e-25	6.16277	0.0484708	0.98192	6.16277	-1.49725	2.04e-22	6.16277	0.15912	0.700456	unknown protein
AT3G24780.1	0.450804	0.222653	0	0.95421	1.61593	1.9531	0.624207	0.845109	0.399595	2.05392	2.60465	1.21084	0.292376	2.67542	1.25e-06	0.292376	1.65096	0.000945976	0.292376	1.41548	0.138618	0.292376	0.391031	0.720397	Uncharacterised conserved protein UCP015417, vWA
AT5G01210.1	76.5616	84.9793	82.1496	182.254	171.648	159.05	92.4606	82.3982	85.9929	152.643	161.825	152.194	6.46218	1.07378	5.43e-21	6.46218	0.838977	1.77e-12	6.46218	0.0983874	0.740827	6.46218	-0.136414	0.571284	HXXXD-type acyl-transferase family protein
AT2G31380.1	6.31126	5.34368	5.63091	1.3518	2.33412	2.20785	2.49683	2.02826	3.27668	1.96056	1.34434	2.2354	3.72315	-1.5575	4.32e-08	3.72315	-0.504178	0.274263	3.72315	-1.14149	7.98e-05	3.72315	-0.0882138	1	salt tolerance homologue
AT5G45150.1	0.450804	0.742178	0.308543	2.22649	1.79548	2.03802	0.390129	0.169022	0.159838	1.4004	1.26032	0.931418	0.019289	1.98959	2.51e-07	0.019289	2.25899	6.23e-05	0.019289	-1.02566	0.333892	0.019289	-0.752159	0.107447	RNAse THREE-like protein 3
AT3G47510.1	3.23077	3.85932	4.3196	10.6553	11.6706	12.1432	2.26275	2.95788	2.15782	7.84223	6.72169	10.0593	2.9922	1.5925	9.25e-16	2.9922	1.73462	5.35e-14	2.9922	-0.630479	0.06287	2.9922	-0.487989	0.0547015	unknown protein
AT4G15430.2	10.8944	10.2421	8.63921	5.48671	4.93757	2.88719	5.46181	6.08479	4.71523	4.66799	4.28507	4.93652	3.11951	-1.15704	1.27e-12	3.11951	-0.227606	0.44576	3.11951	-0.875151	9.06e-08	3.11951	0.0542653	1	ERD (early-responsive to dehydration stress) family protein
AT5G52070.1	10.068	10.1678	12.4189	21.8673	23.0719	24.5411	6.16404	6.00028	7.03288	18.1118	18.2326	16.5792	3.49858	1.08909	5.43e-13	3.49858	1.46135	2.67e-18	3.49858	-0.763812	7.42e-05	3.49858	-0.391414	0.0500065	Agenet domain-containing protein
AT4G01010.1	1.80322	1.48436	3.16257	5.80478	3.59096	4.16095	2.80893	2.36631	2.87709	5.04143	4.20105	4.65709	1.94397	1.08208	6.25e-05	1.94397	0.77983	0.00772441	1.94397	0.326923	0.555277	1.94397	0.0247903	1	cyclic nucleotide-gated channel 13
AT1G15790.1	4.35778	4.67572	4.3196	8.66741	11.0422	12.7376	3.12103	4.73261	4.71523	12.6036	11.1748	9.31418	2.40531	1.2768	4.19e-08	2.40531	1.39768	8.3e-09	2.40531	-0.090587	1	2.40531	0.0304332	1	unknown protein
AT2G37870.1	9.99283	10.5389	17.8955	86.515	108.088	89.1632	22.9396	22.0574	22.7769	105.123	99.2289	77.5871	4.75016	2.88388	9.55e-14	4.75016	2.05606	2.18e-07	4.75016	0.818585	0.111356	4.75016	-0.00921161	1	Bifunctional inhibitor/lipid-transfer protein/seed storage 2S albumin superfamily protein
AT1G74810.1	0.37567	0.519524	0.231407	3.1807	2.96254	1.18884	0.858284	1.60571	0.87911	4.29455	6.21756	4.47081	1.54316	2.66638	2.32e-07	1.54316	2.16424	6.57e-07	1.54316	1.5315	0.0296174	1.54316	1.02923	0.0391994	HCO3- transporter family
AT3G56360.1	62.211	64.7179	66.7225	166.907	145.972	137.651	67.6484	54.3405	62.4168	121.555	111.916	126.859	7.41985	1.21814	1.87e-08	7.41985	0.966018	3.02e-05	7.41985	-0.0703469	1	7.41985	-0.32246	0.389836	unknown protein
AT2G20180.1	4.65831	4.45307	3.93392	10.9734	13.5559	8.8314	7.72456	5.66223	6.23369	7.84223	9.32634	15.3684	4.11342	1.34953	3.14e-11	4.11342	0.723496	0.000997508	4.11342	0.589728	0.032539	4.11342	-0.0362708	1	phytochrome interacting factor 3-like 5
AT1G14790.1	13.449	11.8006	12.4189	24.5709	32.1391	23.8618	16.8536	15.6345	12.7071	22.4064	18.6527	19.8392	3.93823	1.09404	3.11e-15	3.93823	0.428297	0.0105176	3.93823	0.262865	0.243951	3.93823	-0.402853	0.0218264	RNA-dependent RNA polymerase 1
AT4G15430.1	10.7442	9.94518	8.48494	5.16864	4.84779	2.80227	5.30576	6.08479	4.55539	4.38791	4.11703	4.84337	3.07386	-1.18307	2.32e-12	3.07386	-0.256037	0.398848	3.07386	-0.874318	3.09e-07	3.07386	0.052692	1	ERD (early-responsive to dehydration stress) family protein
AT1G63150.1	4.80858	5.78898	4.3196	10.4168	11.4911	8.23698	6.32009	6.00028	4.55539	9.05591	8.73819	8.56905	2.74031	1.01052	4.67e-08	2.74031	0.642639	0.00260117	2.74031	0.17578	0.716833	2.74031	-0.192025	0.622114	Tetratricopeptide repeat (TPR)-like superfamily protein
AT4G28350.1	4.05724	2.59762	2.85402	6.20236	5.92508	7.47272	2.4188	2.53533	2.87709	5.13479	5.9655	5.68165	1.99878	1.04138	0.000618895	1.99878	1.09764	0.00124447	1.99878	-0.279212	0.708289	1.99878	-0.222698	0.780725	Concanavalin A-like lectin protein kinase family protein
AT1G15790.2	4.50804	4.30463	4.62815	8.58789	11.4013	12.5678	3.19906	4.81712	4.95498	12.977	11.0908	9.50047	2.41642	1.27232	9.68e-09	2.41642	1.37257	2.77e-09	2.41642	-0.054031	1	2.41642	0.046352	1	unknown protein
AT4G15530.5	30.2039	19.5193	20.0553	4.77105	5.65576	6.19896	21.9253	18.4234	22.5372	7.93559	6.97375	5.96108	5.43421	-2.0697	4.28e-23	5.43421	-1.59046	9.56e-14	5.43421	-0.149457	0.77409	5.43421	0.32964	0.456111	pyruvate orthophosphate dikinase
AT4G15530.1	30.2039	19.4451	20.0553	4.77105	5.65576	6.19896	21.9253	18.4234	22.4573	7.93559	6.97375	5.96108	5.43515	-2.06817	3.76e-23	5.43515	-1.58863	9.09e-14	5.43515	-0.149752	0.772374	5.43515	0.329648	0.455231	pyruvate orthophosphate dikinase
AT4G15530.4	30.2039	19.4451	20.0553	4.77105	5.65576	6.19896	21.9253	18.4234	22.4573	7.93559	6.97375	5.96108	5.43356	-2.06817	3.24e-23	5.43356	-1.58863	8.4e-14	5.43356	-0.14975	0.771832	5.43356	0.329653	0.454732	pyruvate orthophosphate dikinase
AT4G15530.6	30.2039	19.4451	20.0553	4.77105	5.65576	6.19896	21.9253	18.4234	22.4573	7.93559	6.97375	5.96108	5.43296	-2.06817	4.16e-23	5.43296	-1.58863	9.58e-14	5.43296	-0.149753	0.77292	5.43296	0.329644	0.455582	pyruvate orthophosphate dikinase
AT4G30650.1	57.7781	67.0928	72.5076	25.7637	31.2413	35.92	101.98	94.6522	99.8189	24.647	25.8785	32.9722	5.60312	-1.08688	0.000137645	5.60312	-1.82785	9.14e-11	5.60312	0.586817	0.1106	5.60312	-0.154179	0.899744	Low temperature and salt responsive protein family
AT4G33960.1	6.31126	6.38273	7.63644	13.1999	13.8252	16.3041	8.03666	11.1554	8.47142	9.42935	9.32634	12.3879	3.71139	1.09105	1.81e-11	3.71139	0.171918	0.559139	3.71139	0.441195	0.0491692	3.71139	-0.477897	0.0183058	unknown protein
AT3G20710.1	1.20215	0.816395	0.53995	2.86263	2.96254	3.22686	1.56052	1.85924	1.03895	3.36095	3.52888	3.25996	0.397912	1.8062	1.11e-08	0.397912	1.18773	0.000157008	0.397912	0.785337	0.13491	0.397912	0.167031	0.885495	F-box family protein
AT5G06980.2	10.7442	10.0194	9.33343	3.81684	2.96254	3.56653	6.55417	3.97201	5.83409	3.36095	3.69693	3.35311	4.023	-1.53387	1.28e-11	4.023	-0.653012	0.0294338	4.023	-0.873999	0.000227367	4.023	0.00677921	1	unknown protein
AT1G71380.1	6.16099	5.64055	4.47388	16.3806	14.3638	10.1901	7.64653	7.77501	6.87304	22.7798	18.2326	15.8341	2.30566	1.32911	3.74e-08	2.30566	1.34907	1.81e-08	2.30566	0.452124	0.21876	2.30566	0.472119	0.151825	cellulase 3
AT2G07751.1	0.676207	0.296871	0.53995	2.78311	2.24435	1.69835	0.468155	0.591577	0.799191	1.12032	1.93248	1.86284	0.713031	2.13589	1.81e-05	0.713031	1.39342	0.0210925	0.713031	0.293182	0.930759	0.713031	-0.448238	0.627737	NADH:ubiquinone/plastoquinone oxidoreductase, chain 3 protein
ATMG00990.1	0.676207	0.296871	0.53995	2.78311	2.24435	1.69835	0.468155	0.591577	0.799191	1.21368	1.93248	1.86284	0.715225	2.13597	1.57e-05	0.715225	1.41986	0.0145574	0.715225	0.293191	0.929913	0.715225	-0.421869	0.68878	NADH dehydrogenase 3
AT4G15530.3	30.279	19.3708	20.0553	4.77105	5.65576	6.19896	21.9253	18.3389	22.3773	7.93559	6.97375	5.96108	5.42349	-2.0682	2.5e-23	5.42349	-1.58487	8.4e-14	5.42349	-0.153529	0.75935	5.42349	0.329662	0.453369	pyruvate orthophosphate dikinase
AT3G10200.1	3.7567	2.5234	3.77965	7.39513	8.16943	6.70847	5.22773	2.78886	4.39555	3.82775	3.94899	4.84337	2.18058	1.14498	7.1e-07	2.18058	0.0153932	1	2.18058	0.310994	0.511268	2.18058	-0.81847	0.00242528	S-adenosyl-L-methionine-dependent methyltransferases superfamily protein
AT5G42900.3	1.20215	1.2617	1.46558	3.89636	4.1296	5.68946	2.18472	2.2818	3.03693	2.52072	3.86497	3.25996	1.98261	1.79598	5.66e-07	1.98261	0.364844	0.533452	1.98261	0.92958	0.0561205	1.98261	-0.501464	0.380728	cold regulated gene 27
AT1G75280.1	104.061	100.639	126.271	206.109	250.559	210.34	119.536	103.188	117.961	229.292	230.554	180.136	7.52955	1.0109	2.79e-09	7.52955	0.909502	3.08e-07	7.52955	0.0419441	1	7.52955	-0.0594476	0.997992	NmrA-like negative transcriptional regulator family protein
AT1G68050.1	16.5295	15.6599	15.35	32.3636	33.6652	34.4764	27.6992	27.6351	31.648	19.1388	19.997	23.658	4.26271	1.07947	1.83e-05	4.26271	-0.470205	0.13724	4.26271	0.871212	0.00191916	4.26271	-0.678457	0.0320533	flavin-binding, kelch repeat, f box 1
AT2G21130.1	7.13774	8.08974	7.63644	14.6312	17.057	21.4841	11.3918	8.78914	12.7871	20.0724	20.2491	19.6529	3.43931	1.21549	3.95e-09	3.43931	0.861097	7.15e-05	3.43931	0.52899	0.0534606	3.43931	0.174612	0.731619	Cyclophilin-like peptidyl-prolyl cis-trans isomerase family protein
AT1G50400.1	1.12701	1.18748	0.925629	4.21443	6.01485	4.33078	1.79459	0.92962	1.51846	4.66799	6.21756	4.56395	0.808864	2.15011	1.98e-13	0.808864	1.85264	1.64e-10	0.808864	0.393431	0.626756	0.808864	0.0963532	0.996764	Eukaryotic porin family protein
AT2G02640.1	4.65831	6.82803	7.17363	13.677	14.9922	10.6996	5.22773	6.08479	5.0349	10.7364	11.0908	12.2016	2.1022	1.0757	1.81e-08	2.1022	1.05777	3.51e-07	2.1022	-0.191838	0.693412	2.1022	-0.209659	0.590592	Cysteine/Histidine-rich C1 domain family protein
AT4G20690.1	1.57782	2.15231	1.69699	5.40719	4.03983	3.99111	1.79459	1.85924	2.55741	5.22815	5.71343	4.47081	1.23096	1.30709	1.73e-06	1.23096	1.30889	2.51e-06	1.23096	0.193162	0.84309	1.23096	0.195179	0.768144	unknown protein
AT2G20180.2	4.50804	4.52728	4.0882	11.53	14.0945	9.08615	8.11469	5.66223	6.31361	7.93559	9.5784	15.9273	4.14755	1.39869	3.47e-11	4.14755	0.729021	0.0015601	4.14755	0.615595	0.0303267	4.14755	-0.0540413	1	phytochrome interacting factor 3-like 5
AT5G50160.1	0.676207	0.593742	0.385679	1.51083	1.79548	1.61343	1.48249	1.09864	1.43854	1.68048	1.09227	0.745135	4.41621	1.54583	0.000144363	4.41621	-0.199581	0.877667	4.41621	1.26626	0.012128	4.41621	-0.479267	0.485745	ferric reduction oxidase 8
AT1G29465.1	1.42755	1.78123	2.46835	3.97587	3.59096	4.75537	1.17039	1.5212	1.59838	3.54767	2.85672	2.8874	1.71757	1.11887	2.1e-05	1.71757	1.10945	0.000710272	1.71757	-0.401693	0.482369	1.71757	-0.410589	0.335746	unknown protein
AT1G30990.1	2.77996	2.67184	3.2397	0.874692	1.07729	1.52851	6.39812	9.12718	11.4284	2.52072	2.35259	2.79425	0.970875	-1.31629	0.000424876	0.970875	-1.81064	4.51e-10	0.970875	1.62956	7.86e-09	0.970875	1.13424	0.0172877	Polyketide cyclase/dehydrase and lipid transport superfamily protein
AT1G54200.1	2.62969	4.67572	2.62262	7.39513	7.63078	7.13305	3.74524	4.47908	3.3566	5.88167	5.12529	4.65709	2.10242	1.15187	2.69e-08	2.10242	0.437187	0.124464	2.10242	0.214785	0.676423	2.10242	-0.499773	0.0685325	unknown protein
AT4G08300.1	27.4239	31.3941	31.4714	8.11078	6.64327	8.15206	12.3281	14.1133	17.3424	7.37543	9.74644	8.75533	5.31846	-1.9754	1.66e-22	5.31846	-0.755499	0.00157691	5.31846	-1.04382	4.8e-07	5.31846	0.176027	0.78655	nodulin MtN21 /EamA-like transporter family protein
ATMG00050.1	0.0751341	0.148436	0.0771358	1.19276	1.61593	2.20785	0.312103	0.0845109	0	1.58712	0.75619	1.21084	-0.107934	3.92204	9.79e-11	-0.107934	3.02982	6.57e-06	-0.107934	0.38545	1	-0.107934	-0.501265	0.59678	unknown protein
AT1G45015.1	8.18961	10.8358	9.64197	38.2479	25.7651	25.3903	8.50481	12.1696	11.1887	34.5431	34.0285	41.6344	4.301	1.64102	1.54e-13	4.301	1.79037	1.46e-15	4.301	0.150697	0.842517	4.301	0.300099	0.445177	MD-2-related lipid recognition domain-containing protein
AT4G15530.2	30.7298	19.7419	20.0553	4.77105	5.56598	6.19896	22.0033	18.6769	22.4573	7.93559	7.22581	6.05422	5.40308	-2.09273	7.27e-24	5.40308	-1.57216	1.12e-13	5.40308	-0.159139	0.743477	5.40308	0.361293	0.383757	pyruvate orthophosphate dikinase
AT5G56600.2	3.98211	5.34368	4.85955	10.1782	11.9399	10.5297	5.30576	6.50734	6.47345	9.24263	11.4269	12.6673	3.75905	1.19843	5.11e-11	3.75905	0.867934	5.4e-06	3.75905	0.363467	0.210156	3.75905	0.0330206	1	profilin 3
AT2G02610.1	10.669	11.8748	11.956	25.048	25.8549	22.588	8.58284	10.1413	9.43045	19.1388	18.5687	23.1923	2.95219	1.0902	1.23e-14	2.95219	1.11233	3.58e-13	2.95219	-0.294477	0.216456	2.95219	-0.272277	0.205768	Cysteine/Histidine-rich C1 domain family protein
AT3G08860.1	6.76207	4.67572	8.87061	19.7203	23.9696	20.3802	11.2357	10.0568	9.90997	17.1782	15.964	20.5843	4.25343	1.65683	1.76e-08	4.25343	0.782521	0.021444	4.25343	0.620334	0.13615	4.25343	-0.253944	0.719259	PYRIMIDINE 4
AT3G04360.1	2.17889	1.33592	1.38844	6.20236	4.66824	5.34979	2.7309	2.61984	4.47547	3.73439	4.28507	5.40223	0.850804	1.72212	1.07e-07	0.850804	0.446367	0.305998	0.850804	0.999631	0.0153934	0.850804	-0.276088	0.711585	Calcium-dependent lipid-binding (CaLB domain) family protein
AT4G17440.2	1.80322	1.92966	2.1598	4.29394	4.39892	3.99111	1.95065	2.95788	3.51644	3.54767	2.60465	4.56395	1.6838	1.10279	2.92e-05	1.6838	0.340039	0.358232	1.6838	0.51105	0.195516	1.6838	-0.251613	0.655983	Protein of unknown function (DUF1639)
AT3G08770.1	8.56528	9.203	9.41057	3.10118	4.21937	4.24587	9.83125	12.9302	14.3055	7.46879	10.0825	6.61307	4.835	-1.23475	6.84e-07	4.835	-0.611396	0.0199384	4.835	0.446492	0.148595	4.835	1.06961	0.00016453	lipid transfer protein 6
AT3G54260.1	110.147	109.397	124.034	297.077	347.784	322.346	121.096	99.3849	121.157	239.468	239.292	218.604	6.4304	1.49307	2.96e-33	6.4304	1.02914	1.25e-15	6.4304	-0.00778724	1	6.4304	-0.471716	0.00169085	TRICHOME BIREFRINGENCE-LIKE 36
AT1G28660.1	3.45617	3.04293	4.39674	7.7132	6.46372	8.23698	2.96498	2.45082	2.95701	3.26759	4.95724	5.1228	3.47401	1.0424	1.47e-05	3.47401	0.671485	0.0385686	3.47401	-0.374368	0.390596	3.47401	-0.745015	0.0101465	GDSL-like Lipase/Acylhydrolase superfamily protein
AT1G03495.1	6.76207	7.34756	9.71911	22.9806	25.0469	22.4182	9.6752	11.409	8.95094	25.674	23.5259	24.31	3.92191	1.5637	4.66e-31	3.92191	1.292	8.91e-22	3.92191	0.333205	0.127683	3.92191	0.0615607	0.943987	HXXXD-type acyl-transferase family protein
AT2G01990.1	5.18425	5.56633	4.55101	12.7228	14.1843	14.4359	8.73889	6.33832	8.31158	9.24263	9.24232	10.3387	2.8241	1.42898	2.23e-21	2.8241	0.295525	0.151788	2.8241	0.614088	0.0017355	2.8241	-0.519323	0.0027837	unknown protein
AT1G67370.1	2.40429	2.59762	2.08267	7.07706	7.36146	6.62355	2.4188	3.29593	3.51644	7.74887	8.31809	5.96108	1.8008	1.56564	3.17e-13	1.8008	1.25896	9.88e-09	1.8008	0.375539	0.382419	1.8008	0.0690019	1	DNA-binding HORMA family protein
AT2G30550.1	14.0501	14.7693	16.8156	40.4744	35.0118	33.2027	21.223	24.0011	21.6581	53.0284	43.5229	48.8063	4.60111	1.25247	2.43e-13	4.60111	1.11949	7.3e-11	4.60111	0.551046	0.009261	4.60111	0.418071	0.0622067	alpha/beta-Hydrolases superfamily protein
AT4G13190.1	0.300536	0.296871	0.771358	2.46504	2.69322	2.97211	1.79459	0.845109	0.719272	4.76135	4.20105	3.25996	0.293184	2.55098	1.96e-06	0.293184	1.84742	0.000187701	0.293184	1.29076	0.0921819	0.293184	0.587254	0.454395	Protein kinase superfamily protein
AT5G37440.1	0.901609	1.48436	2.1598	6.99754	6.28418	6.96322	2.1067	1.85924	1.6783	7.00199	7.05777	7.45135	1.58858	2.15376	2.41e-19	1.58858	1.92246	9.32e-16	1.58858	0.316322	0.666884	1.58858	0.0853427	0.977703	Chaperone DnaJ-domain superfamily protein
AT4G11990.1	1.57782	1.48436	1.38844	2.62408	3.41141	3.22686	1.71657	1.26766	1.6783	2.24064	2.18455	2.2354	1.09106	1.04583	0.000318541	1.09106	0.50568	0.21222	1.09106	0.0712271	1	1.09106	-0.468588	0.274171	Cell cycle regulated microtubule associated protein
AT4G35420.1	4.58318	5.64055	5.78518	12.8023	14.1843	16.2192	8.27074	9.88778	10.0698	11.8567	13.7795	16.2067	3.54248	1.42965	5.22e-20	3.54248	0.568691	0.000776043	3.54248	0.816027	7.41e-06	3.54248	-0.0449191	1	dihydroflavonol 4-reductase-like1
AT4G37850.1	1.50268	1.55857	1.61985	14.2336	10.5036	9.25599	1.56052	2.2818	2.0779	21.3794	17.0563	17.3244	1.9457	2.85428	4.35e-19	1.9457	3.2315	3.29e-25	1.9457	0.333804	0.71711	1.9457	0.71137	0.0529586	basic helix-loop-helix (bHLH) DNA-binding superfamily protein
AT3G53310.1	0.676207	0.296871	0.385679	2.54456	2.15457	2.4626	1.56052	1.43669	1.27871	2.14728	2.26857	3.44625	1.43007	2.37612	9.61e-10	1.43007	0.86848	0.0202879	1.43007	1.63393	0.00109824	1.43007	0.126087	0.9729	AP2/B3-like transcriptional factor family protein
AT1G15190.1	1.95349	1.48436	1.31131	3.49877	4.30915	4.67045	1.63854	1.5212	1.27871	4.66799	3.02476	3.63253	0.944308	1.3845	3e-05	0.944308	1.34023	0.000268419	0.944308	-0.0977888	1	0.944308	-0.141617	0.962494	Fasciclin-like arabinogalactan family protein
AT5G56910.1	4.35778	4.74994	6.09373	9.5421	9.60581	12.313	4.60352	4.98615	5.91401	9.9895	8.73819	10.6182	3.22656	1.04955	1.46e-09	3.22656	0.916334	1.11e-06	3.22656	0.030115	1	3.22656	-0.10301	0.881653	Proteinase inhibitor I25, cystatin, conserved region
AT2G34490.1	16.7549	17.4412	24.1435	46.5972	51.9791	43.4777	18.8822	23.8321	25.0946	26.2341	34.4486	36.8842	4.75869	1.28371	4.07e-08	4.75869	0.52535	0.0676761	4.75869	0.216967	0.67849	4.75869	-0.541367	0.0895792	cytochrome P450, family 710, subfamily A, polypeptide 2
AT5G37072.1	0.676207	0.371089	0.231407	1.51083	1.34661	1.69835	1.01434	0.92962	0.479515	1.49376	1.5964	2.51483	0.00443942	1.8068	0.000505213	0.00443942	1.19583	0.0204047	0.00443942	0.902357	0.284172	0.00443942	0.291563	0.831721	pseudogene
AT1G15772.1	0.225402	0.148436	0.154272	0.795175	0.807965	1.35868	0.390129	0.676087	0.0799191	1.58712	0.924232	1.30399	-0.898952	2.42098	0.000106312	-0.898952	1.71491	0.00350809	-0.898952	1.0585	0.452641	-0.898952	0.352997	0.828201	unknown protein
AT2G30550.2	17.1306	17.9607	20.441	49.7779	43.9892	41.3547	25.7485	30.2549	25.8938	66.5656	54.6977	57.9342	4.92952	1.28329	3.54e-16	4.92952	1.12959	6.2e-13	4.92952	0.559924	0.00322278	4.92952	0.406231	0.0463279	alpha/beta-Hydrolases superfamily protein
AT3G08770.2	7.51341	7.71865	7.55931	2.54456	3.50118	3.14194	8.03666	10.5639	11.0288	5.41487	7.5619	5.49537	4.48602	-1.31323	3.55e-07	4.48602	-0.674879	0.0116075	4.48602	0.37692	0.27297	4.48602	1.01498	0.00101984	lipid transfer protein 6
AT5G43380.2	2.10375	1.70701	1.92839	5.32767	6.64327	6.62355	3.97932	5.74674	5.35458	7.74887	6.63766	5.40223	2.34442	1.68909	1.15e-08	2.34442	0.393629	0.294954	2.34442	1.38735	1.78e-05	2.34442	0.0918189	1	type one serine/threonine protein phosphatase 6
AT5G43380.3	2.10375	1.55857	1.92839	5.32767	6.64327	6.62355	3.97932	5.66223	5.19474	7.56215	6.63766	5.21594	2.32887	1.72709	5.01e-09	2.32887	0.390065	0.320514	2.32887	1.40185	1.43e-05	2.32887	0.0647544	1	type one serine/threonine protein phosphatase 6
AT5G43380.1	2.62969	2.30075	3.16257	7.15657	8.2592	8.66157	4.75958	7.77501	6.07385	9.89614	8.06602	7.26506	2.69273	1.56977	1.42e-08	2.69273	0.440839	0.212366	2.69273	1.19672	0.000113233	2.69273	0.0677575	1	type one serine/threonine protein phosphatase 6
AT4G34060.1	1.05188	0.890613	1.23417	2.38552	4.30915	3.31178	3.90129	3.8875	3.11684	5.04143	5.88147	6.98564	1.82314	1.6356	1.96e-08	1.82314	0.714297	0.00221028	1.82314	1.77211	5.97e-10	1.82314	0.850519	0.000579014	demeter-like protein 3
AT5G23830.1	90.6117	86.241	101.665	253.184	202.44	177.732	122.032	128.457	131.627	308.928	288.36	286.504	6.85197	1.18533	5.99e-09	6.85197	1.20963	7.13e-09	6.85197	0.456235	0.0942694	6.85197	0.480536	0.0845326	MD-2-related lipid recognition domain-containing protein
AT4G23340.2	0.751341	0.66796	0.617086	2.94215	3.14209	3.05702	0.93631	0.507066	0.959029	3.26759	2.52063	2.14226	0.278213	2.14798	1.32e-09	0.278213	1.69814	1.06e-05	0.278213	0.244305	0.94429	0.278213	-0.204724	0.846248	2-oxoglutarate (2OG) and Fe(II)-dependent oxygenase superfamily protein
AT2G27535.1	0.0751341	0	0	1.98794	0.897739	0.339669	1.95065	3.04239	0.399595	3.54767	2.85672	3.44625	0.120932	4.95987	7.6e-06	0.120932	0.868491	0.277282	0.120932	5.6902	4.51e-08	0.120932	1.5895	0.0398058	ribosomal protein L10A family protein
AT3G22880.1	6.3864	6.45694	4.47388	12.4842	10.8626	12.5678	8.81692	8.45109	7.1128	13.5372	12.4351	12.7604	3.56785	1.05067	4.29e-09	3.56785	0.666359	0.000487005	3.56785	0.490739	0.0407659	3.56785	0.106453	0.87133	DNA repair (Rad51) family protein
AT3G01060.3	3.60644	3.93354	3.54825	1.27228	0.897739	0.509504	2.57485	1.5212	2.95701	1.49376	1.26032	0.931418	4.52228	-2.02516	9.2e-12	4.52228	-0.93794	0.0143338	4.52228	-0.642742	0.0385317	4.52228	0.443763	0.650083	unknown protein
AT1G45015.2	6.68693	8.23817	7.40504	30.7733	21.0071	20.9746	6.63219	9.12718	8.87102	27.6345	25.4584	33.1585	4.00992	1.70404	2.23e-14	4.00992	1.80766	9.55e-16	4.00992	0.139532	0.876464	4.00992	0.243214	0.585007	MD-2-related lipid recognition domain-containing protein
AT3G49830.1	0.751341	0.890613	1.31131	3.33973	4.03983	3.99111	1.24841	2.87337	1.51846	2.05392	2.60465	3.63253	0.415922	1.93516	1.76e-08	0.415922	0.562966	0.227585	0.415922	0.919009	0.0701228	0.415922	-0.453038	0.410493	P-loop containing nucleoside triphosphate hydrolases superfamily protein
AT2G20180.3	3.83184	4.23041	3.62538	9.78065	12.5684	8.3219	6.9443	4.98615	5.4345	7.09535	8.65417	13.9713	3.95074	1.38599	5.44e-11	3.95074	0.768847	0.0007694	3.95074	0.572219	0.050798	3.95074	-0.0448742	1	phytochrome interacting factor 3-like 5
AT5G35940.1	23.1413	17.9607	15.5043	95.739	65.8941	40.081	21.067	26.0294	19.2605	156.751	129.813	109.628	4.65838	1.83281	6.73e-05	4.65838	2.57747	4.14e-08	4.65838	0.228927	0.899822	4.65838	0.973609	0.113437	Mannose-binding lectin superfamily protein
AT5G38000.1	15.6279	17.2185	23.3721	39.0431	49.5552	43.4777	26.4508	30.6775	32.607	37.624	42.0946	38.5607	4.46119	1.23182	5.95e-06	4.46119	0.398648	0.277011	4.46119	0.67456	0.04791	4.46119	-0.15861	0.877845	Zinc-binding dehydrogenase family protein
AT5G02030.1	0.525939	0.445307	0.308543	1.51083	1.43638	1.9531	0.390129	0.253533	0.87911	1.02696	1.17629	0.838276	2.76729	1.90954	8.36e-06	2.76729	0.9808	0.102508	2.76729	0.252014	0.944506	2.76729	-0.675444	0.242382	POX (plant homeobox) family protein
AT3G06437.1	7.58854	8.90613	7.55931	16.6192	17.3264	18.3421	7.33443	4.98615	7.19272	14.8442	14.5356	14.7164	3.22936	1.11818	5.35e-11	3.22936	1.17056	1.99e-10	3.22936	-0.297926	0.322544	3.22936	-0.245447	0.404363	pseudogene
AT5G23830.2	75.2843	73.2529	83.3838	210.324	168.775	148.435	103.306	104.794	107.251	256.833	242.233	239.468	6.59951	1.18582	2.81e-13	6.59951	1.22761	8.4e-14	6.59951	0.44335	0.0324911	6.59951	0.485137	0.0183058	MD-2-related lipid recognition domain-containing protein
AT2G28870.1	2.47942	3.04293	2.85402	5.0096	8.07965	5.68946	2.88696	2.36631	3.7562	3.26759	3.86497	4.19138	1.4074	1.15703	6.7e-05	1.4074	0.326849	0.510843	1.4074	0.107235	1	1.4074	-0.722752	0.0516231	unknown protein
AT1G22990.1	8.18961	6.60538	8.02212	18.13	16.3389	20.1254	10.5335	12.7612	12.3075	18.5786	14.9557	21.0501	2.70739	1.25909	4.69e-14	2.70739	0.61452	0.000702492	2.70739	0.640578	0.00152523	2.70739	-0.00397727	1	Heavy metal transport/detoxification superfamily protein
AT4G13310.2	3.5313	3.04293	2.23694	17.5734	13.6456	4.9252	1.17039	1.35217	1.75822	14.004	12.5191	8.47591	2.06488	2.03266	0.000456265	2.06488	3.0223	8.61e-07	2.06488	-1.03704	0.232263	2.06488	-0.0467038	1	cytochrome P450, family 71, subfamily A, polypeptide 20
AT4G23340.1	0.751341	0.816395	0.617086	3.41925	3.14209	3.56653	1.09236	0.591577	1.03895	3.45431	2.43661	2.14226	0.37472	2.19647	2.13e-10	0.37472	1.53721	4.78e-05	0.37472	0.321106	0.849193	0.37472	-0.337446	0.590168	2-oxoglutarate (2OG) and Fe(II)-dependent oxygenase superfamily protein
AT5G67620.1	8.41502	8.90613	10.3362	20.277	16.0695	20.2952	12.172	12.6766	14.3854	18.2052	22.0975	24.4032	3.49399	1.03568	1.11e-08	3.49399	0.721648	0.000148742	3.49399	0.504673	0.0301903	3.49399	0.190651	0.606456	unknown protein
AT2G38465.1	2.47942	1.78123	2.1598	4.77105	4.21937	5.26487	3.74524	3.1269	3.67628	3.73439	3.36084	3.91196	2.20172	1.15042	4.7e-07	2.20172	0.0547196	1	2.20172	0.717705	0.0142859	2.20172	-0.377961	0.266389	unknown protein
AT4G21120.1	6.16099	7.05069	7.01936	18.9252	17.3264	17.1533	17.0096	18.3389	19.1806	25.674	27.6429	27.4768	3.24935	1.40013	9.77e-18	3.24935	0.567619	0.000532463	3.24935	1.42896	3.07e-18	3.24935	0.596418	0.000504487	amino acid transporter 1
AT2G46610.2	7.43827	5.19524	5.24523	11.4505	14.1843	13.0773	5.07168	4.56359	7.27264	12.0434	12.7712	10.8976	3.318	1.10997	3.82e-11	3.318	1.07652	2.47e-09	3.318	-0.0783624	0.980338	3.318	-0.111714	0.830859	RNA-binding (RRM/RBD/RNP motifs) family protein
AT5G08240.1	40.347	47.1283	47.3614	118.163	98.7513	108.1	46.6594	47.9177	54.1851	82.1567	82.7608	110.466	5.58361	1.26939	2.19e-14	5.58361	0.887993	5.14e-07	5.58361	0.141829	0.735483	5.58361	-0.239555	0.429009	unknown protein
AT1G10300.1	3.38103	3.19136	4.0882	9.46258	11.2217	9.42582	4.75958	4.90163	3.7562	9.33599	11.6789	8.38276	1.78961	1.49475	1.64e-14	1.78961	1.13556	1.78e-08	1.78961	0.331539	0.355545	1.78961	-0.0275479	1	Nucleolar GTP-binding protein
AT3G16640.1	1425.82	1310.83	1290.64	2912.49	2770.96	2995.88	1282.43	1197.6	1358.14	2259.87	2200.43	2830.67	10.5241	1.10777	7.38e-26	10.5241	0.925642	8.78e-18	10.5241	-0.0693726	0.844521	10.5241	-0.251502	0.100038	translationally controlled tumor protein
AT4G15330.1	11.4204	11.6522	12.4189	39.9973	32.1391	21.569	9.83125	11.409	10.869	34.8232	35.793	34.183	3.74504	1.40128	8.82e-15	3.74504	1.70663	1.59e-20	3.74504	-0.145032	0.786052	3.74504	0.16038	0.712852	cytochrome P450, family 705, subfamily A, polypeptide 1
AT3G07650.2	9.09122	9.94518	9.95052	25.8432	24.4185	27.3434	16.4634	13.6908	16.4633	16.2446	16.4681	19.8392	4.36001	1.42027	1.07e-19	4.36001	0.170486	0.507031	4.36001	0.686323	0.000214525	4.36001	-0.563441	0.0021452	CONSTANS-like 9
ATMG00920.1	0	0	0.0771358	0.63614	0.538644	1.18884	0.0780258	0.0845109	0.0799191	0.28008	0.504126	0.186284	-1.56256	4.50643	1e-05	-1.56256	1.89339	0.227585	-1.56256	1.3735	0.947704	-1.56256	-1.23499	0.198437	unknown protein
AT5G57790.2	1.27728	1.2617	2.1598	4.05539	2.4239	3.56653	1.17039	1.35217	0.559434	2.52072	1.68042	2.32855	1.44311	1.10357	0.000617664	1.44311	1.07282	0.0120348	1.44311	-0.604929	0.342723	1.44311	-0.634864	0.155246	unknown protein
AT2G28650.1	2.02862	2.89449	2.31407	5.40719	4.21937	5.09504	1.95065	2.78886	2.95701	2.89416	2.43661	3.72567	1.21723	1.02449	3.08e-05	1.21723	0.230552	0.643271	1.21723	0.0833065	1	1.21723	-0.710407	0.0208401	exocyst subunit exo70 family protein H8
AT5G39850.1	18.6333	20.113	21.3666	39.3612	45.7847	50.1861	29.1036	25.6913	24.5352	48.4538	43.1868	38.8401	4.48278	1.16994	9.23e-15	4.48278	0.717188	9.13e-06	4.48278	0.400637	0.0459775	4.48278	-0.0521072	1	Ribosomal protein S4
AT3G52900.1	17.957	17.5896	17.587	33.5564	38.1539	38.3826	18.024	18.9304	20.5392	31.1822	28.3151	24.6826	4.72633	1.04953	2.1e-18	4.72633	0.55008	5.99e-05	4.72633	0.113549	0.714781	4.72633	-0.385877	0.00914955	Family of unknown function (DUF662)
AT3G06433.1	16.7549	17.8865	16.1214	35.3058	38.7823	34.8161	15.6832	12.2541	15.0248	31.8357	33.4404	28.6877	4.29918	1.09981	2.23e-16	4.29918	1.12727	1.46e-15	4.29918	-0.238825	0.300377	4.29918	-0.211316	0.349308	pseudogene
AT5G03995.1	3.0805	2.37497	2.77689	6.59995	5.65576	5.26487	3.35511	2.87337	3.19676	5.60159	7.47787	7.07878	2.60257	1.08953	4.79e-05	2.60257	1.09476	7.36e-05	2.60257	0.196854	0.814482	2.60257	0.202206	0.769422	unknown protein
AT4G37380.1	4.05724	2.67184	3.54825	8.11078	7.00237	5.68946	4.44747	3.29593	4.15579	6.81527	6.3856	8.0102	2.70609	1.01965	5.43e-07	2.70609	0.824953	0.000147056	2.70609	0.216446	0.671348	2.70609	0.0218353	1	Tetratricopeptide repeat (TPR)-like superfamily protein
AT1G04620.1	3.68157	3.78511	3.08543	8.90596	9.42626	8.57665	4.75958	6.08479	5.75417	6.53519	7.14179	7.63763	3.3444	1.34625	9.71e-10	3.3444	0.362495	0.22131	3.3444	0.64872	0.0261676	3.3444	-0.334987	0.342167	coenzyme F420 hydrogenase family / dehydrogenase, beta subunit family
AT3G07650.3	9.39176	9.87096	10.0277	26.5588	24.8674	27.4283	16.6975	14.0288	16.4633	16.6181	16.8042	20.3049	4.37734	1.4284	3.15e-20	4.37734	0.184848	0.458306	4.37734	0.688846	0.000164772	4.37734	-0.554685	0.00244728	CONSTANS-like 9
AT5G14840.1	40.7227	38.8159	37.1023	127.546	126.671	122.196	33.317	32.8748	33.1664	112.219	116.285	127.697	5.81391	1.68987	1.16e-61	5.81391	1.84146	5.56e-71	5.81391	-0.231364	0.155454	5.81391	-0.0797546	0.796321	pseudogene
AT3G07650.4	10.5188	11.2069	10.8761	27.9106	26.9322	31.7591	18.102	15.8035	19.1806	18.5786	18.8207	22.1678	4.54329	1.40873	9.68e-20	4.54329	0.164371	0.52664	4.54329	0.703774	0.000100283	4.54329	-0.540566	0.00341024	CONSTANS-like 9
AT3G08810.1	0.0751341	0.0742178	0.231407	0.874692	0.807965	0.594421	0.312103	0.422555	0.239757	0.840239	0.504126	1.1177	-1.03839	2.50425	0.000980212	-1.03839	1.30045	0.0711086	-1.03839	1.29547	0.452679	-1.03839	0.0919185	1	Galactose oxidase/kelch repeat superfamily protein
AT1G57770.1	1.80322	1.70701	0.617086	0.556622	0.359096	0.509504	2.4188	2.11277	2.71725	0.840239	1.34434	0.931418	4.26107	-1.51075	0.000718975	4.26107	-1.19863	0.000562066	4.26107	0.803488	0.0243576	4.26107	1.11353	0.0868647	FAD/NAD(P)-binding oxidoreductase family protein
AT1G14960.1	22.4651	24.7887	27.1518	103.532	61.136	72.1797	28.6355	37.1848	38.2013	57.8831	77.1313	69.8564	5.61219	1.6707	2.37e-12	5.61219	0.978141	0.000162116	5.61219	0.483075	0.156316	5.61219	-0.209469	0.726931	Polyketide cyclase/dehydrase and lipid transport superfamily protein
AT3G07650.1	10.8193	11.1327	10.9533	28.6263	27.381	31.844	18.3361	16.1416	19.1806	18.9521	19.1568	22.6335	4.55971	1.41612	1.91e-20	4.55971	0.177115	0.472081	4.55971	0.705844	7.34e-05	4.55971	-0.533147	0.00342884	CONSTANS-like 9
AT1G28660.2	3.23077	2.82027	4.01106	6.99754	6.10463	8.06715	2.88696	2.19728	2.71725	2.89416	4.70518	4.75023	3.38018	1.07405	1.52e-05	3.38018	0.661124	0.0456265	3.38018	-0.36057	0.450779	3.38018	-0.773204	0.00913604	GDSL-like Lipase/Acylhydrolase superfamily protein
AT5G38060.1	0.901609	1.11327	1.0799	2.78311	2.33412	2.03802	1.95065	2.02826	1.59838	2.24064	1.76444	1.58341	1.54895	1.20625	0.000265632	1.54895	0.00196534	1	1.54895	0.842254	0.0472828	1.54895	-0.362007	0.564423	unknown protein
AT3G24100.1	28.2504	29.0934	30.9314	101.385	95.4297	120.413	44.3187	40.4807	39.48	117.167	108.387	124.344	5.92134	1.84546	3.09e-67	5.92134	1.49237	3.22e-45	5.92134	0.493926	0.000140414	5.92134	0.140849	0.486749	Uncharacterised protein family SERF
AT5G42900.1	1.42755	1.41014	1.46558	4.29394	4.57847	6.02913	2.4188	2.53533	3.3566	2.42736	3.94899	3.53939	2.04958	1.78441	2.26e-07	2.04958	0.257652	0.712952	2.04958	0.945416	0.0432225	2.04958	-0.58126	0.246429	cold regulated gene 27
AT5G42900.2	1.42755	1.41014	1.46558	4.29394	4.57847	6.02913	2.4188	2.53533	3.3566	2.52072	3.94899	3.53939	2.05751	1.78442	2.59e-07	2.05751	0.270835	0.690414	2.05751	0.945412	0.0442984	2.05751	-0.568088	0.265368	cold regulated gene 27
AT1G68238.1	7.0626	6.16007	9.10202	12.6433	16.3389	23.6919	9.98731	10.9019	9.83005	9.24263	8.90623	9.96617	3.85015	1.23735	8.65e-08	3.85015	-0.127855	0.840158	3.85015	0.460628	0.176565	3.85015	-0.904526	0.000602639	unknown protein
AT1G07120.1	1.72808	1.78123	2.08267	2.94215	4.39892	4.16095	2.26275	1.5212	1.43854	2.70744	2.43661	2.70111	1.20829	1.03042	0.000178007	1.20829	0.576128	0.130131	1.20829	-0.0913074	1	1.20829	-0.545253	0.151664	unknown protein
AT2G22420.1	7.73881	7.9413	10.1819	18.2095	21.0969	20.7198	8.66087	9.80327	8.71118	19.0454	17.2243	17.5107	3.64525	1.21379	4.29e-15	3.64525	0.984587	2.49e-09	3.64525	0.0713902	0.968517	3.64525	-0.15775	0.641741	Peroxidase superfamily protein
AT3G41762.1	1.50268	0.742178	0.462815	3.89636	2.96254	2.54752	1.56052	0.92962	0.87911	2.8008	3.10878	2.2354	0.731031	1.78513	0.000167207	0.731031	1.26322	0.0162864	0.731031	0.314207	0.897998	0.731031	-0.207211	0.931288	unknown protein
AT4G34060.2	0.976743	0.742178	1.0799	2.30601	4.1296	3.14194	3.43314	3.8875	2.95701	4.66799	5.62941	6.61307	1.73443	1.75409	6.98e-09	1.73443	0.719389	0.00386655	1.73443	1.86594	5.15e-10	1.73443	0.830926	0.00160764	demeter-like protein 3
AT3G62050.1	1.57782	1.55857	1.0799	2.22649	3.14209	3.31178	1.95065	1.5212	2.0779	2.334	2.43661	2.60797	0.930018	1.02653	0.000774086	0.930018	0.404288	0.368987	0.930018	0.395386	0.521992	0.930018	-0.226703	0.800515	Putative endonuclease or glycosyl hydrolase
AT4G17250.1	5.86046	5.56633	4.85955	9.5421	11.4013	12.7376	6.00799	5.32419	6.07385	9.61607	8.65417	10.3387	3.66457	1.04496	9.18e-06	3.66457	0.713377	0.00843287	3.66457	0.0962172	0.987986	3.66457	-0.235287	0.641259	unknown protein
AT4G32340.1	1.57782	1.18748	1.46558	6.75899	7.18191	9.08615	3.35511	3.04239	3.51644	4.48127	5.37735	5.30908	4.64301	2.43617	2.06e-24	4.64301	0.61231	0.0314142	4.64301	1.22555	8.8e-05	4.64301	-0.598252	0.0241893	Tetratricopeptide repeat (TPR)-like superfamily protein
AT3G15990.1	17.356	15.0662	21.2895	40.1563	43.3608	41.4397	32.4587	35.4946	39.5599	41.6385	43.2708	35.0213	4.30041	1.21818	5.37e-14	4.30041	0.158348	0.558167	4.30041	1.00151	3.28e-09	4.30041	-0.0583242	0.994869	sulfate transporter 3;4
AT3G10120.1	1.87835	2.22653	2.77689	9.5421	8.43875	8.74648	4.29142	2.95788	3.43652	7.18871	7.89798	7.45135	3.01656	1.95634	4.58e-18	3.01656	1.0713	8.17e-06	3.01656	0.638999	0.067875	3.01656	-0.245921	0.552338	unknown protein
AT4G13195.1	2.17889	2.5234	2.69975	5.96381	6.82282	6.28388	4.99365	3.1269	6.39353	9.89614	8.99025	8.38276	2.05641	1.36068	4.83e-08	2.05641	0.903011	0.000149542	2.05641	0.974444	0.00065672	2.05641	0.516739	0.0819262	CLAVATA3/ESR-RELATED 44
AT4G37970.1	4.50804	4.23041	6.32513	11.0529	14.4536	13.332	4.05734	2.87337	3.7562	9.9895	9.41036	6.2405	2.52783	1.36448	8.63e-11	2.52783	1.25802	1.76e-07	2.52783	-0.488142	0.154673	2.52783	-0.594371	0.0220522	cinnamyl alcohol dehydrogenase 6
AT1G69840.4	7.96421	6.90225	7.71358	12.7228	16.7877	16.2192	8.19271	7.6905	8.95094	13.1637	13.6114	9.50047	4.16437	1.01459	1.72e-09	4.16437	0.547877	0.00588367	4.16437	0.13843	0.784164	4.16437	-0.328227	0.175589	SPFH/Band 7/PHB domain-containing membrane-associated protein family
AT1G69840.5	7.73881	6.82803	7.63644	12.6433	16.4286	16.0494	8.03666	7.26794	8.95094	12.8837	13.1913	9.40732	4.14007	1.0197	1.58e-09	4.14007	0.549319	0.00686342	4.14007	0.129178	0.809908	4.14007	-0.341146	0.156749	SPFH/Band 7/PHB domain-containing membrane-associated protein family
AT1G69840.6	7.73881	6.82803	7.55931	12.6433	16.4286	16.0494	8.11469	7.26794	8.95094	12.8837	13.1913	9.40732	4.13947	1.02467	1.44e-09	4.13947	0.544611	0.0071646	4.13947	0.138835	0.779895	4.13947	-0.341171	0.158406	SPFH/Band 7/PHB domain-containing membrane-associated protein family
AT4G15236.1	3.38103	1.85544	2.00553	5.48671	5.65576	4.4157	2.1067	3.46495	2.55741	5.78831	4.87322	5.96108	1.87211	1.09939	0.000324422	1.87211	1.03211	0.00168144	1.87211	0.160408	0.930497	1.87211	0.0932744	1	ABC-2 and Plant PDR ABC-type transporter family protein
AT1G69840.7	7.81394	6.82803	7.79071	12.8818	16.4286	16.2192	8.19271	7.35245	8.95094	13.1637	13.2753	9.40732	4.15007	1.01819	1.63e-09	4.15007	0.549673	0.00644697	4.15007	0.128708	0.812522	4.15007	-0.339747	0.161675	SPFH/Band 7/PHB domain-containing membrane-associated protein family
AT5G42370.1	4.58318	4.97259	4.85955	9.14451	10.8626	9.25599	4.8376	6.1693	4.55539	7.93559	8.73819	5.68165	2.45017	1.01716	1.11e-08	2.45017	0.531026	0.0182968	2.45017	0.106182	0.912509	2.45017	-0.379861	0.121663	Calcineurin-like metallo-phosphoesterase superfamily protein
AT2G01008.1	2.17889	1.85544	1.38844	7.63368	3.95005	6.28388	1.24841	1.5212	0.799191	4.48127	3.44486	4.28452	1.65205	1.71707	6.25e-06	1.65205	1.76713	5.06e-05	1.65205	-0.604696	0.418783	1.65205	-0.553873	0.369048	unknown protein
AT1G31790.1	1.27728	1.18748	0.617086	1.98794	2.15457	3.14194	1.24841	1.43669	1.19879	1.8672	1.68042	2.2354	1.16631	1.22576	0.000332191	1.16631	0.568121	0.224516	1.16631	0.322999	0.693872	1.16631	-0.334313	0.63282	Tetratricopeptide repeat (TPR)-like superfamily protein
AT4G20235.1	1.20215	1.70701	1.15704	2.86263	3.32164	3.48161	2.02867	2.19728	1.99798	2.14728	2.68867	1.86284	0.699402	1.23723	3.07e-05	0.699402	0.114946	0.955432	0.699402	0.606356	0.199019	0.699402	-0.515797	0.220519	cytochrome P450, family 71, subfamily A, polypeptide 28
AT1G69840.2	7.81394	6.82803	7.63644	12.6433	16.6082	16.474	8.11469	7.26794	8.87102	12.977	13.4434	9.50047	4.14645	1.03395	1.1e-09	4.14645	0.567215	0.00482823	4.14645	0.124226	0.826095	4.14645	-0.342446	0.155457	SPFH/Band 7/PHB domain-containing membrane-associated protein family
AT1G69840.3	7.81394	6.82803	7.55931	12.8023	16.698	16.6438	8.11469	7.43696	9.03086	13.3505	13.3593	9.40732	4.18423	1.05221	9.76e-10	4.18423	0.555523	0.00708866	4.18423	0.148328	0.759417	4.18423	-0.348303	0.158521	SPFH/Band 7/PHB domain-containing membrane-associated protein family
AT1G61950.1	0.525939	0.66796	0.617086	2.54456	1.97503	1.9531	3.04301	2.02826	2.23773	3.92111	3.94899	2.42169	0.602614	1.82345	0.000245829	0.602614	0.491528	0.418412	0.602614	1.99789	0.000137139	0.602614	0.665475	0.320149	calcium-dependent protein kinase 19
AT3G62680.1	22.6905	23.0075	34.9425	119.117	78.642	89.5878	57.1929	69.5525	62.5766	112.032	121.494	103.853	5.35538	1.83308	1.82e-05	5.35538	0.833506	0.106585	5.35538	1.23105	0.0134488	5.35538	0.231473	0.890419	proline-rich protein 3
AT1G14890.1	19.4597	15.8826	16.5071	36.8961	37.346	37.2787	13.4985	14.5359	15.0248	28.1947	25.7104	27.1974	4.65248	1.1044	3.06e-10	4.65248	0.912763	1.91e-06	4.65248	-0.268139	0.382165	4.65248	-0.459729	0.046378	Plant invertase/pectin methylesterase inhibitor superfamily protein
AT2G46610.1	6.08586	4.23041	3.39397	10.0192	11.3115	11.0393	3.82327	3.46495	5.99393	9.9895	10.3346	9.03476	3.0304	1.23392	3.61e-12	3.0304	1.14097	2.29e-09	3.0304	-0.0446291	1	3.0304	-0.137455	0.770727	RNA-binding (RRM/RBD/RNP motifs) family protein
AT1G67910.1	2.32916	1.41014	3.0083	3.97587	5.92508	6.11405	1.32644	2.11277	1.6783	2.334	2.43661	2.8874	2.1274	1.24306	0.000212299	2.1274	0.582553	0.25472	2.1274	-0.398905	0.620551	2.1274	-1.0589	0.00752528	unknown protein
AT2G34510.1	4.28264	3.56245	3.0083	9.30355	7.81033	8.3219	3.51116	5.15517	3.67628	3.54767	6.3856	5.30908	5.1268	1.22737	3.18e-08	5.1268	0.315883	0.378289	5.1268	0.178898	0.790342	5.1268	-0.732445	0.00474819	Protein of unknown function, DUF642
AT3G22142.1	0.676207	1.48436	0.617086	0.159035	0.0897739	0	10.5335	13.4372	5.11482	0.746879	0.504126	0.186284	4.786	-3.31428	9.69e-06	4.786	-4.30528	8.93e-30	4.786	3.36747	2.79e-24	4.786	2.36295	0.0698549	Bifunctional inhibitor/lipid-transfer protein/seed storage 2S albumin superfamily protein
AT5G51810.1	3.0805	1.85544	2.39121	9.06499	7.27169	7.04814	4.05734	5.74674	5.0349	8.96255	11.931	11.4564	2.00069	1.67264	8.04e-09	2.00069	1.12615	9.15e-05	2.00069	1.01347	0.00420712	2.00069	0.466982	0.253953	gibberellin 20 oxidase 2
AT4G12310.1	5.03398	4.30463	3.54825	1.43131	2.33412	1.9531	3.74524	3.80299	3.99595	1.21368	1.34434	1.86284	4.01283	-1.18152	2.82e-06	4.01283	-1.38212	1.84e-06	4.01283	-0.159913	0.807242	4.01283	-0.360711	0.644742	cytochrome P450, family 706, subfamily A, polypeptide 5
AT4G21320.1	3.45617	4.15619	3.62538	14.7903	13.7354	12.313	3.66721	3.63397	2.39757	12.6036	12.1831	14.1576	2.70659	1.85932	5.06e-31	2.70659	2.00168	1.38e-31	2.70659	-0.214142	0.65802	2.70659	-0.0715477	0.945651	Aldolase-type TIM barrel family protein
AT1G12320.1	5.78532	6.53116	4.85955	13.1999	16.6082	14.7756	8.11469	5.91577	9.11078	16.2446	16.4681	12.481	2.96231	1.37033	3.63e-16	2.96231	0.962805	2.67e-08	2.96231	0.431499	0.0892462	2.96231	0.0240237	1	Protein of unknown function (DUF1442)
AT4G36515.1	3.3059	3.19136	3.0083	5.72526	6.5535	8.66157	4.05734	3.1269	3.27668	6.62855	5.79745	6.42679	2.54399	1.13376	1.46e-08	2.54399	0.841501	0.000143556	2.54399	0.140848	0.883141	2.54399	-0.151281	0.777304	unknown protein
AT1G69325.1	2.77996	2.00388	3.47111	5.88429	6.64327	7.89731	2.26275	3.04239	2.79717	2.8008	4.53714	3.91196	2.2414	1.30522	6.33e-06	2.2414	0.479562	0.273318	2.2414	-0.0271209	1	2.2414	-0.852513	0.0135697	Remorin family protein
AT1G30760.1	29.152	33.6206	32.2428	78.2452	79.809	79.3977	85.5943	97.1876	87.0319	140.693	127.04	110.094	5.39132	1.32111	3.63e-06	5.39132	0.485772	0.182708	5.39132	1.50538	2.73e-07	5.39132	0.670034	0.0759652	FAD-binding Berberine family protein
AT1G34060.1	1.87835	2.00388	3.39397	5.24815	6.10463	7.89731	3.12103	2.78886	2.47749	5.13479	5.71343	4.75023	2.06294	1.4019	4.78e-08	2.06294	0.89413	0.00267917	2.06294	0.209005	0.827348	2.06294	-0.298576	0.531693	Pyridoxal phosphate (PLP)-dependent transferases superfamily protein
AT3G01060.1	4.35778	4.15619	3.85679	1.51083	1.07729	0.679339	2.80893	1.60571	3.19676	1.58712	1.26032	1.02456	4.65063	-1.9003	1.15e-11	4.65063	-0.979066	0.00709706	4.65063	-0.690621	0.0167352	4.65063	0.230117	0.944206	unknown protein
AT3G44550.1	57.2522	70.9522	79.2956	27.9902	34.2936	37.1938	185.936	191.164	194.523	81.6899	91.919	94.9115	5.96288	-1.06107	3.83e-09	5.96288	-1.08985	1.23e-09	5.96288	1.46191	5.09e-17	5.96288	1.4331	3e-15	fatty acid reductase 5
AT4G24660.1	0.37567	0.519524	0.231407	1.51083	0.897739	1.44359	0.858284	0.591577	0.639353	1.4004	1.17629	2.79425	2.68991	1.75084	0.000766697	2.68991	1.33174	0.00463334	2.68991	0.873386	0.302877	2.68991	0.454466	0.549729	homeobox protein 22
AT5G60100.3	6.76207	5.26946	5.86232	26.3203	28.2788	23.9467	16.2294	13.5217	15.3445	26.7943	27.3909	35.9527	3.71948	2.13214	2.94e-19	3.71948	0.997622	5.76e-05	3.71948	1.33285	2.49e-07	3.71948	0.198323	0.733949	pseudo-response regulator 3
AT5G19790.1	3.98211	3.26558	6.09373	16.6192	11.2217	14.4359	8.81692	11.0709	7.91199	15.9645	17.3924	18.9078	2.68524	1.66342	0.000160941	2.68524	0.910499	0.0744806	2.68524	1.05799	0.0519223	2.68524	0.305067	0.801241	related to AP2 11
AT5G52310.1	82.0464	89.655	135.759	17.3348	24.1492	22.3333	72.486	58.3971	63.6955	16.6181	15.6279	26.0797	6.28212	-2.26832	1.21e-10	6.28212	-1.73828	2.62e-06	6.28212	-0.659842	0.17441	6.28212	-0.129826	0.99192	low-temperature-responsive protein 78 (LTI78) / desiccation-responsive protein 29A (RD29A)
AT1G51440.1	0.676207	1.18748	1.23417	4.77105	5.92508	5.34979	1.24841	1.18315	1.27871	3.36095	2.43661	2.42169	1.2018	2.35909	3.11e-19	1.2018	1.13513	0.0008534	1.2018	0.260485	0.885947	1.2018	-0.962871	0.000301716	alpha/beta-Hydrolases superfamily protein
AT1G34180.1	3.15563	3.48823	4.0882	11.6096	12.0297	12.5678	6.16404	5.57772	5.27466	9.61607	10.3346	14.9958	2.19978	1.75224	2.48e-14	2.19978	1.03469	1.8e-05	2.19978	0.665178	0.0344244	2.19978	-0.0523122	1	NAC domain containing protein 16
AT4G26270.1	9.24149	8.83191	11.1847	20.0384	23.9696	24.8808	9.3631	11.8315	7.35256	17.8317	20.7532	20.7706	3.39759	1.23433	4.96e-13	3.39759	1.05862	6.95e-09	3.39759	-0.0372692	1	3.39759	-0.212915	0.505768	phosphofructokinase 3
AT5G60100.1	6.68693	5.34368	5.78518	26.9564	28.189	23.8618	16.0733	13.5217	15.1846	27.0744	27.895	35.9527	3.72078	2.14691	3.81e-20	3.72078	1.02029	2.49e-05	3.72078	1.32894	1.67e-07	3.72078	0.202315	0.714827	pseudo-response regulator 3
AT5G53190.1	1.27728	0.371089	0.694222	3.6578	1.79548	3.48161	0.156052	0.422555	0.559434	1.02696	0.588147	0.558851	0.847463	1.92357	0.000116411	0.847463	0.915965	0.358394	0.847463	-1.02897	0.336312	0.847463	-2.03361	0.000363542	Nodulin MtN3 family protein
AT5G42370.2	4.05724	4.67572	4.3196	8.58789	9.87513	8.3219	4.60352	5.66223	3.99595	7.37543	7.72994	5.58851	2.3179	1.03244	3.96e-09	2.3179	0.544346	0.0130049	2.3179	0.123012	0.860079	2.3179	-0.364981	0.132921	Calcineurin-like metallo-phosphoesterase superfamily protein
AT5G65040.1	7.36314	7.42178	7.01936	15.1083	14.2741	18.6818	9.98731	9.97229	10.0698	12.6969	13.5274	15.5547	3.36615	1.13941	1.84e-12	3.36615	0.475367	0.0120637	3.36615	0.460966	0.0353026	3.36615	-0.203046	0.502414	Protein of unknown function (DUF581)
AT4G17250.2	4.80858	4.89837	3.70252	7.95175	9.60581	10.1901	4.91563	4.47908	5.19474	7.84223	7.30983	8.10334	3.41728	1.04475	3.62e-05	3.41728	0.669576	0.0252641	3.41728	0.121205	0.947916	3.41728	-0.253873	0.625602	unknown protein
AT4G32200.1	11.7209	11.9491	10.8761	28.4673	26.214	23.6919	10.0653	10.2258	10.4694	23.1532	24.7022	20.2118	3.52585	1.18155	4.18e-18	3.52585	1.1467	2.42e-15	3.52585	-0.167812	0.587476	3.52585	-0.202593	0.386412	DNA-binding HORMA family protein
AT5G60100.2	6.16099	5.04681	5.32237	25.7637	26.7526	22.7578	15.3711	12.6766	14.8649	26.3275	26.1306	33.9036	3.64971	2.18493	7.04e-21	3.64971	1.00726	2.94e-05	3.64971	1.37547	4.97e-08	3.64971	0.19779	0.722913	pseudo-response regulator 3
AT1G60970.1	0.0751341	0	0.0771358	1.03373	0.359096	1.18884	0	0.253533	0.159838	1.12032	1.09227	1.49027	-1.07569	3.86224	7.05e-05	-1.07569	3.09308	0.000195202	-1.07569	1.26824	0.837065	-1.07569	0.501491	0.773305	SNARE-like superfamily protein
AT2G26370.1	3.98211	4.52728	4.16533	14.7107	10.4138	6.28388	6.39812	8.19756	7.67223	20.0724	15.964	18.5352	2.85399	1.30964	1.74e-06	2.85399	1.29227	1.16e-06	2.85399	0.810183	0.0146517	2.85399	0.792798	0.00965515	MD-2-related lipid recognition domain-containing protein
AT1G30935.1	2.77996	2.5234	2.46835	6.28188	5.92508	6.28388	1.56052	2.2818	1.91806	5.13479	3.86497	4.09824	1.59464	1.24807	2.31e-09	1.59464	1.18233	7.05e-06	1.59464	-0.436819	0.304111	1.59464	-0.502147	0.0635452	pseudogene
AT1G34180.2	3.00536	2.89449	3.93392	10.6553	9.96491	12.0583	5.46181	5.15517	4.55539	8.68247	9.41036	13.9713	2.06582	1.73159	6.84e-13	2.06582	1.07612	1.81e-05	2.06582	0.625975	0.0731398	2.06582	-0.0294232	1	NAC domain containing protein 16
AT1G78780.1	14.2003	13.3592	16.1985	25.9227	28.4583	34.3915	17.3217	13.5217	16.3834	21.5661	17.8125	20.4912	3.36104	1.0201	7.62e-09	3.36104	0.33945	0.14703	3.36104	0.111779	0.857167	3.36104	-0.568841	0.00823814	pathogenesis-related family protein
AT3G50480.1	1.12701	1.92966	1.61985	4.5325	4.1296	5.09504	4.36945	2.87337	4.79515	10.9231	3.36084	7.26506	3.48113	1.55076	0.000167207	3.48113	0.831538	0.0598628	3.48113	1.36037	0.00359244	3.48113	0.641025	0.258189	homolog of RPW8 4
AT5G15210.1	2.17889	3.26558	2.62262	6.52043	9.15694	8.3219	4.68155	2.36631	3.43652	4.10783	4.7892	6.51993	3.36773	1.56284	2.9e-14	3.36773	0.543782	0.0436741	3.36773	0.38472	0.313395	3.36773	-0.634192	0.00834273	homeobox protein 30
AT5G43330.1	31.932	31.8394	37.6423	95.6595	96.507	99.608	49.4684	47.5797	43.3961	114.272	110.404	110.746	5.74807	1.52472	6.13e-41	5.74807	1.25569	4.73e-28	5.74807	0.470095	0.000697581	5.74807	0.201069	0.280531	Lactate/malate dehydrogenase family protein
AT5G25110.1	9.39176	10.1678	11.4932	27.9106	21.7253	24.3713	17.3998	12.9302	14.4654	16.8981	18.4846	33.5311	3.26654	1.25342	1.48e-08	3.26654	0.618736	0.0154608	3.26654	0.529591	0.0730741	3.26654	-0.105078	0.942513	CBL-interacting protein kinase 25
AT5G20240.1	0.300536	0.593742	0.925629	6.12285	3.41141	6.3688	0.312103	0.760598	0.399595	5.41487	5.79745	4.65709	0.615775	3.11659	2e-17	0.615775	3.41918	2.01e-18	0.615775	-0.310673	0.978575	0.615775	-0.00619359	1	K-box region and MADS-box transcription factor family protein
AT4G21590.1	3.0805	3.3398	2.69975	5.08912	6.46372	7.55764	1.63854	2.2818	2.23773	5.97503	6.3856	5.49537	1.08199	1.05975	2.78e-06	1.08199	1.53717	1.12e-09	1.08199	-0.56984	0.138177	1.08199	-0.0920519	0.964681	endonuclease 3
AT1G78750.1	0.150268	0.0742178	0.154272	1.90842	3.23186	3.39669	0.546181	0.422555	0.319676	3.54767	2.10053	3.35311	1.13377	4.38514	5.86e-20	1.13377	2.76097	1.77e-12	1.13377	1.69931	0.165268	1.13377	0.0753852	1	F-box/RNI-like superfamily protein
AT5G61740.1	0.0751341	0	0	0.397587	0.44887	0.93409	0.156052	0.0845109	0	0.840239	0.672169	0.0931418	0.0122532	4.10025	0.000409398	0.0122532	2.58748	0.022279	0.0122532	1.37336	0.948994	0.0122532	-0.135831	1	ABC2 homolog 14
AT4G11190.1	33.6601	36.5894	47.0528	103.134	100.188	92.39	35.9699	42.7625	38.0415	84.7707	103.598	72.2781	5.62703	1.33397	1.4e-09	5.62703	1.15876	5.41e-07	5.62703	-0.00656571	1	5.62703	-0.18176	0.758518	Disease resistance-responsive (dirigent-like protein) family protein
AT2G05630.2	13.2236	14.4725	15.35	26.5588	28.7277	32.2686	20.3647	18.1699	19.3404	24.1802	22.0135	28.7808	4.45992	1.0234	3.35e-16	4.45992	0.370143	0.0134687	4.45992	0.428115	0.00706121	4.45992	-0.225131	0.257902	Ubiquitin-like superfamily protein
AT1G64260.1	0.150268	0.222653	0.154272	0.874692	0.538644	1.35868	0.312103	0.338044	0.319676	1.21368	0.672169	0.186284	-0.435551	2.33445	0.000381407	-0.435551	1.07033	0.201805	-0.435551	0.84022	0.753476	-0.435551	-0.422641	0.807086	MuDR family transposase
AT1G52342.1	3.60644	2.59762	3.39397	9.78065	6.64327	9.25599	3.27708	2.78886	2.79717	8.02895	7.05777	13.3193	3.27305	1.42173	3.54e-09	3.27305	1.67088	1.34e-11	3.27305	-0.111867	0.987986	3.27305	0.137503	0.864199	unknown protein
AT1G05450.2	0.751341	0.519524	0.925629	2.70359	1.79548	2.4626	2.80893	4.14104	3.51644	2.42736	4.03301	3.25996	1.11223	1.65933	0.000234575	1.11223	-0.099247	0.980612	1.11223	2.23843	2.13e-07	1.11223	0.479342	0.513405	Bifunctional inhibitor/lipid-transfer protein/seed storage 2S albumin superfamily protein
AT1G76870.1	0.751341	1.63279	1.31131	3.41925	4.93757	3.99111	1.63854	1.60571	2.23773	4.29455	3.02476	3.81881	1.3993	1.72491	1.62e-09	1.3993	1.01088	0.00123335	1.3993	0.565884	0.278774	1.3993	-0.147932	0.890346	unknown protein
AT4G33550.1	21.864	24.195	30.083	41.4286	55.5701	57.5739	32.1466	31.9451	35.9636	34.6365	33.4404	32.1339	5.56224	1.02107	8.77e-05	5.56224	0.00219174	1	5.56224	0.394157	0.319098	5.56224	-0.624712	0.0656328	Bifunctional inhibitor/lipid-transfer protein/seed storage 2S albumin superfamily protein
AT4G23670.1	1829.51	1737.73	2064.85	3601.27	3765.03	4423.09	2274.53	2510.9	3078.64	3362.36	3468.22	3909.44	10.9068	1.06574	2.52e-07	10.9068	0.449644	0.0759602	10.9068	0.481606	0.0720481	10.9068	-0.134492	0.855015	Polyketide cyclase/dehydrase and lipid transport superfamily protein
AT3G43800.1	46.8837	46.9798	52.1438	106.792	84.2977	104.194	51.6531	52.9038	60.0992	85.5176	84.3572	99.5686	5.77989	1.01694	1.57e-21	5.77989	0.709947	2.95e-10	5.77989	0.173667	0.335436	5.77989	-0.133317	0.545	glutathione S-transferase tau 27
AT2G13360.2	106.465	85.1278	62.7114	29.0239	28.0992	29.9758	78.65	69.2145	85.1138	22.4997	19.2408	31.7614	8.82831	-1.54552	1.18e-10	8.82831	-1.66508	1.75e-11	8.82831	-0.126337	0.893959	8.82831	-0.245913	0.660885	alanine:glyoxylate aminotransferase
AT2G13360.1	107.367	85.7957	64.0227	29.2624	28.997	30.5702	80.3666	70.0596	86.3126	22.8732	19.745	31.6682	8.85322	-1.53345	1.27e-10	8.85322	-1.67281	1.02e-11	8.85322	-0.119481	0.90819	8.85322	-0.258866	0.630981	alanine:glyoxylate aminotransferase
AT1G54160.1	0.300536	0.964831	1.0799	1.98794	3.68073	1.69835	1.01434	1.09864	1.27871	2.14728	1.68042	1.30399	1.22274	1.6297	1.9e-05	1.22274	0.592384	0.288505	1.22274	0.529165	0.545843	1.22274	-0.507754	0.39703	nuclear factor Y, subunit A5
AT1G23850.1	9.01609	9.64831	10.0277	24.5709	19.84	19.0215	9.3631	11.747	12.3875	23.0599	22.6017	21.8883	3.45298	1.14568	1.49e-11	3.45298	1.01248	7.31e-09	3.45298	0.22218	0.491919	3.45298	0.0890224	0.905094	unknown protein
AT4G39235.1	1.27728	1.41014	1.77412	2.86263	3.23186	3.99111	1.17039	1.85924	1.35862	3.45431	3.86497	4.37767	1.71108	1.17078	2.6e-05	1.71108	1.41606	7.17e-07	1.71108	-0.0297686	1	1.71108	0.215877	0.712158	unknown protein
AT3G01060.2	3.98211	3.78511	3.77965	1.43131	1.07729	0.594421	2.7309	1.5212	3.03693	1.4004	1.26032	1.02456	4.54016	-1.87578	1.08e-10	4.54016	-0.985532	0.00934715	4.54016	-0.652938	0.0362516	4.54016	0.236775	0.939422	unknown protein
AT3G57700.1	0.601073	0.742178	0.385679	1.98794	1.52616	2.4626	0.546181	1.77473	0.319676	2.98752	2.18455	2.79425	0.50356	1.77092	3.73e-05	0.50356	1.60091	7.94e-05	0.50356	0.573367	0.568977	0.50356	0.403767	0.53963	Protein kinase superfamily protein
AT1G48400.1	0.0751341	0.296871	0.385679	1.3518	1.52616	1.44359	0.234077	0.338044	0.239757	1.30704	0.672169	0.931418	-0.418031	2.46872	8.19e-05	-0.418031	1.79982	0.0174338	-0.418031	0.0940604	1	-0.418031	-0.572006	0.595749	F-box/RNI-like/FBD-like domains-containing protein
AT1G13790.1	0.150268	0.519524	0.231407	2.78311	1.97503	2.97211	0.546181	0.591577	0.239757	4.10783	3.44486	1.21084	2.33743	3.05799	1.94e-12	2.33743	2.65146	6.32e-11	2.33743	0.585177	0.755514	2.33743	0.179987	0.920608	XH/XS domain-containing protein
AT2G20340.1	21.4883	22.1169	25.3005	9.86017	12.2093	10.0202	12.094	13.0147	13.5862	5.97503	5.9655	6.51993	3.58096	-1.1038	6.55e-10	3.58096	-1.06687	3.29e-07	3.58096	-0.832011	9.72e-06	3.58096	-0.795058	0.0007798	Pyridoxal phosphate (PLP)-dependent transferases superfamily protein
AT5G66640.1	0.601073	0.445307	0.462815	1.3518	2.51367	2.37768	1.01434	1.43669	1.51846	2.98752	2.7727	1.95598	0.397157	2.01965	6.95e-05	0.397157	0.957439	0.0621347	0.397157	1.37518	0.029729	0.397157	0.312824	0.808123	DA1-related protein 3
AT1G23970.1	9.39176	10.8358	10.8761	22.9806	25.7651	28.4473	15.8392	13.2682	13.1866	29.2216	24.5342	25.7071	4.05116	1.30959	8.83e-23	4.05116	0.906596	2.87e-11	4.05116	0.444617	0.0133329	4.05116	0.0416406	1	Protein of unknown function (DUF626)
AT5G39020.1	4.50804	5.71477	5.86232	11.4505	12.4786	8.49173	6.71022	6.9299	7.19272	8.02895	7.982	9.40732	2.75839	1.00959	0.000163498	2.75839	0.28594	0.486901	2.75839	0.372704	0.398448	2.75839	-0.350905	0.452378	Malectin/receptor-like protein kinase family protein
AT4G03070.1	1.87835	1.48436	2.31407	3.89636	3.23186	4.24587	2.4188	2.70435	1.99798	2.334	2.85672	2.42169	1.9844	1.00565	0.000139902	1.9844	0.103763	0.964225	1.9844	0.32611	0.532745	1.9844	-0.575608	0.108196	2-oxoglutarate (2OG) and Fe(II)-dependent oxygenase superfamily protein
AT1G21810.1	0.901609	2.37497	1.54272	2.86263	4.30915	4.4157	2.4188	2.11277	2.87709	3.26759	3.36084	1.76969	1.93794	1.25227	5.27e-05	1.93794	0.183869	0.805946	1.93794	0.617262	0.190306	1.93794	-0.451033	0.352431	Plant protein of unknown function (DUF869)
AT5G03720.1	0.901609	0.890613	1.0799	2.94215	3.59096	2.71735	0.858284	1.35217	1.11887	2.61408	1.93248	1.39713	1.60374	1.67545	1.32e-06	1.60374	0.835478	0.0830725	1.60374	0.206227	0.944199	1.60374	-0.633165	0.180997	heat shock transcription factor A3
AT5G46730.1	8.64042	9.203	9.87338	18.3685	25.6753	25.5601	14.7469	20.2826	15.0248	22.1263	19.913	14.437	4.30797	1.32682	2.11e-06	4.30797	0.17514	0.777878	4.30797	0.851407	0.0104776	4.30797	-0.300268	0.599236	glycine-rich protein
AT3G47030.1	0.37567	0.371089	0.308543	1.03373	1.34661	2.63244	0.156052	0.507066	0.159838	1.21368	1.68042	1.30399	-0.180234	2.21122	3.94e-05	-0.180234	2.33558	0.000156107	-0.180234	-0.37234	0.907665	-0.180234	-0.244809	0.916216	F-box and associated interaction domains-containing protein
AT3G02610.1	6.16099	7.27334	5.47664	20.5155	14.9025	13.5868	12.5622	12.1696	13.826	28.4748	24.7862	29.7122	3.22299	1.37361	3.06e-11	3.22299	1.10388	3.81e-08	3.22299	1.02594	5.48e-06	3.22299	0.756188	0.000619214	Plant stearoyl-acyl-carrier-protein desaturase family protein
AT5G65205.1	2.85509	2.15231	2.77689	5.08912	5.56598	5.60454	3.35511	2.95788	3.67628	4.85471	4.11703	5.96108	2.09166	1.05964	2.72e-05	2.09166	0.571626	0.0562086	2.09166	0.361881	0.41045	2.09166	-0.126046	0.929371	NAD(P)-binding Rossmann-fold superfamily protein
AT1G03400.1	1.50268	1.48436	1.15704	4.05539	2.60344	3.65144	1.63854	1.69022	2.0779	3.45431	3.27682	4.65709	2.66424	1.31512	5.06e-06	2.66424	1.06517	0.00041218	2.66424	0.379737	0.558561	2.66424	0.129982	0.913453	2-oxoglutarate (2OG) and Fe(II)-dependent oxygenase superfamily protein
AT1G34140.1	0.0751341	0.0742178	0	0.556622	1.25684	0.764256	0	0	0.159838	0.18672	0.168042	0.558851	-1.76595	3.83702	3.57e-05	-1.76595	2.27323	0.132262	-1.76595	0.0818242	1	-1.76595	-1.46757	0.167945	poly(A) binding protein 1
AT1G61390.2	1.20215	1.41014	1.00277	2.38552	3.50118	2.80227	1.48249	1.43669	1.27871	2.98752	2.52063	1.95598	0.515029	1.24662	4.63e-05	0.515029	0.82591	0.0232163	0.515029	0.211269	0.857086	0.515029	-0.209102	0.820483	S-locus lectin protein kinase family protein
AT5G67060.1	0	0.222653	0	0.795175	0.718191	1.10393	0.312103	0.169022	0.319676	0.28008	0.672169	0.838276	0.494442	3.37128	0.000215699	0.494442	1.12557	0.265724	0.494442	1.70944	0.397075	0.494442	-0.536256	0.792761	basic helix-loop-helix (bHLH) DNA-binding superfamily protein
AT4G23060.1	3.5313	4.37885	4.39674	8.98548	9.69558	7.72748	4.36945	4.98615	3.99595	6.06839	5.9655	6.70621	3.10553	1.09883	1.49e-09	3.10553	0.489122	0.0412577	3.10553	0.11513	0.903071	3.10553	-0.494456	0.0307965	IQ-domain 22
AT3G04220.1	1.80322	1.55857	1.31131	2.94215	3.23186	4.07603	4.91563	5.07066	4.79515	5.97503	3.86497	3.35311	1.4624	1.12466	0.000169823	1.4624	-0.167112	0.764955	1.4624	1.65317	9.94e-10	1.4624	0.361158	0.412697	Disease resistance protein (TIR-NBS-LRR class) family
AT2G20720.1	0.976743	0.890613	0.617086	3.57829	3.05231	3.73636	0.702232	1.18315	1.11887	2.70744	3.44486	2.79425	1.30009	2.04705	4.35e-08	1.30009	1.57373	0.000164126	1.30009	0.262698	0.935548	1.30009	-0.209984	0.877845	Pentatricopeptide repeat (PPR) superfamily protein
AT5G10570.1	0.901609	0.66796	0.53995	2.46504	1.88525	2.20785	1.09236	0.760598	0.639353	1.30704	1.84846	2.14226	0.740367	1.62587	1.76e-05	0.740367	1.07517	0.017643	0.740367	0.240332	0.946829	0.740367	-0.309691	0.733937	basic helix-loop-helix (bHLH) DNA-binding superfamily protein
AT5G44900.1	2.55456	3.71089	3.0083	7.31561	9.33649	6.62355	3.66721	4.73261	4.07587	4.10783	4.87322	5.58851	1.82588	1.32184	9.11e-07	1.82588	0.225672	0.668747	1.82588	0.423765	0.373034	1.82588	-0.672291	0.0505193	Toll-Interleukin-Resistance (TIR) domain family protein
AT1G78780.3	12.1717	11.578	14.9643	23.7757	26.6629	31.5892	14.5908	12.6766	14.785	20.2591	16.3001	18.5352	3.23545	1.08284	2.7e-11	3.23545	0.386779	0.0645099	3.23545	0.121131	0.816599	3.23545	-0.574891	0.00296488	pathogenesis-related family protein
AT5G59490.1	4.05724	4.89837	6.78795	11.8481	14.7229	13.9264	7.33443	8.11305	8.47142	10.4563	9.24232	13.4124	3.09807	1.36139	3e-14	3.09807	0.465751	0.0313687	3.09807	0.604183	0.00927827	3.09807	-0.291425	0.301263	Haloacid dehalogenase-like hydrolase (HAD) superfamily protein
AT4G21590.2	2.77996	3.26558	2.69975	5.0096	6.1944	7.30289	1.40446	2.2818	2.23773	5.50823	6.30158	5.21594	1.03108	1.07444	2.81e-06	1.03108	1.52708	2.39e-09	1.03108	-0.56664	0.155819	1.03108	-0.113611	0.906386	endonuclease 3
AT4G40090.1	15.4776	19.2224	25.2234	73.4742	52.7871	55.5359	45.411	51.2981	47.3121	78.7957	82.7608	72.2781	5.0509	1.60104	9.15e-06	5.0509	0.699193	0.110918	5.0509	1.26481	0.00160005	5.0509	0.362949	0.632868	arabinogalactan protein 3
AT1G32640.1	73.3309	63.6788	72.4305	161.341	173.264	122.706	59.0655	68.8764	65.6935	100.549	106.287	112.795	6.46052	1.12652	1.87e-09	6.46052	0.723128	0.000497633	6.46052	-0.113292	0.858592	6.46052	-0.516675	0.0334921	Basic helix-loop-helix (bHLH) DNA-binding family protein
AT1G72660.3	0.300536	0.519524	0.53995	4.77105	3.77051	5.09504	0.312103	0.422555	0.399595	3.64103	4.3691	4.0051	0.954201	3.3026	2.31e-23	0.954201	3.37655	2.12e-20	0.954201	-0.259207	1	0.954201	-0.18283	0.827873	P-loop containing nucleoside triphosphate hydrolases superfamily protein
AT1G28480.1	3.23077	3.19136	4.70528	6.04333	11.132	6.3688	1.79459	1.77473	2.0779	5.13479	4.53714	4.28452	2.31859	1.07633	0.000435311	2.31859	1.29946	0.000353461	2.31859	-0.97272	0.0173512	2.31859	-0.749096	0.0532047	Thioredoxin superfamily protein
AT5G46730.2	8.11448	8.83191	9.4877	17.4143	23.7003	23.6919	13.8886	19.015	13.5063	21.006	18.0645	13.8781	4.21786	1.29216	5.26e-06	4.21786	0.191018	0.741864	4.21786	0.810646	0.0173025	4.21786	-0.290489	0.629487	glycine-rich protein
AT1G05370.1	1.05188	0.742178	0.694222	2.62408	2.87277	2.12293	2.96498	2.78886	2.87709	1.49376	2.10053	1.67655	0.869055	1.59999	4.53e-06	0.869055	-0.700856	0.0442271	0.869055	1.78197	1.05e-07	0.869055	-0.519122	0.318775	Sec14p-like phosphatidylinositol transfer family protein
AT3G11745.1	1.42755	1.48436	1.38844	3.26022	2.4239	3.22686	0.780258	0.92962	1.99798	2.334	2.35259	2.42169	1.03419	1.05089	0.000839998	1.03419	0.930899	0.0159144	1.03419	-0.210925	0.921743	1.03419	-0.330396	0.621995	unknown protein
AT1G23970.2	9.84256	11.1327	11.4161	23.9348	27.2015	29.6361	15.9173	13.8598	13.9858	30.1552	25.3744	26.4523	4.10736	1.31651	2.66e-23	4.10736	0.902768	2.87e-11	4.10736	0.435149	0.0143609	4.10736	0.0214323	1	Protein of unknown function (DUF626)
AT3G18080.1	34.3363	29.9098	32.0885	101.067	107.011	100.372	55.3203	53.3264	66.0931	85.5176	88.7262	71.9986	7.91743	1.67857	4.71e-24	7.91743	0.494909	0.012088	7.91743	0.859078	2.44e-06	7.91743	-0.324581	0.206453	B-S glucosidase 44
AT1G72660.2	0.37567	0.519524	0.53995	4.77105	3.86028	5.09504	0.390129	0.422555	0.399595	3.64103	4.28507	4.0051	0.967121	3.23538	4.16e-23	0.967121	3.26936	1.03e-19	0.967121	-0.238668	1	0.967121	-0.202446	0.779086	P-loop containing nucleoside triphosphate hydrolases superfamily protein
AT1G80240.1	39.5205	38.0737	40.1877	82.4596	78.0135	89.6727	52.5894	63.7212	52.1872	87.6649	76.3751	82.9894	4.64091	1.08664	4.42e-14	4.64091	0.552041	0.0005937	4.64091	0.51608	0.00245409	4.64091	-0.0185186	1	Protein of unknown function, DUF642
AT1G77920.1	22.1646	26.1246	26.2262	52.6406	52.3382	58.8477	36.8282	34.903	38.8407	39.958	43.6069	52.9046	4.99225	1.13634	1.16e-16	4.99225	0.302928	0.0849173	4.99225	0.569552	0.000355611	4.99225	-0.263857	0.21697	bZIP transcription factor family protein
AT4G13310.1	7.81394	6.16007	7.09649	28.4673	23.6105	14.0963	4.29142	5.23968	5.0349	20.3524	18.5687	12.7604	2.82686	1.64999	0.000255531	2.82686	1.82545	0.000128197	2.82686	-0.532141	0.51245	2.82686	-0.356498	0.752554	cytochrome P450, family 71, subfamily A, polypeptide 20
AT5G65300.1	3.0805	2.15231	2.85402	5.16864	5.65576	5.85929	2.02867	2.61984	1.6783	2.05392	2.01651	1.76969	1.89711	1.04204	0.000299188	1.89711	-0.109441	1	1.89711	-0.355896	0.555552	1.89711	-1.50694	2.08e-06	unknown protein
AT1G30730.1	68.1466	54.55	49.1355	26.7179	28.7277	24.626	42.446	45.1288	39.0804	28.8482	20.7532	22.1678	4.22336	-1.10183	7.71e-11	4.22336	-0.820329	9.26e-06	4.22336	-0.44033	0.0383992	4.22336	-0.158842	0.729462	FAD-binding Berberine family protein
AT1G72660.1	0.300536	0.519524	0.53995	4.77105	4.03983	5.17996	0.312103	0.422555	0.399595	3.92111	4.53714	4.19138	0.990425	3.33863	4.02e-25	0.990425	3.45029	1.82e-22	0.990425	-0.259239	1	0.990425	-0.145151	0.880983	P-loop containing nucleoside triphosphate hydrolases superfamily protein
AT3G55090.1	2.93023	3.48823	4.01106	7.55416	7.81033	9.25599	19.2724	16.3951	19.1806	16.9915	19.913	17.4175	3.25621	1.23741	5.18e-07	3.25621	-0.0135201	1	3.25621	2.39314	8.06e-27	3.25621	1.14205	5.87e-07	ABC-2 type transporter family protein
AT1G24100.1	49.1377	52.9173	64.177	136.611	136.726	133.405	79.8984	81.5531	79.5195	127.81	142.836	139.992	6.68231	1.2912	2.21e-37	6.68231	0.769224	2.34e-13	6.68231	0.535948	2.56e-06	6.68231	0.0139768	1	UDP-glucosyl transferase 74B1
AT5G39790.1	3.23077	1.85544	3.16257	5.80478	6.10463	6.19896	3.51116	3.38044	3.59636	7.28207	6.04952	6.14736	2.90075	1.13351	3.62e-07	2.90075	0.888344	0.000120445	2.90075	0.348937	0.392054	2.90075	0.103856	0.922324	5'-AMP-activated protein kinase-related
AT2G04190.1	0	0	0	0.238552	1.16706	1.27376	0.312103	0.338044	0.0799191	0.28008	0.0840211	0	-1.26761	6.48989	8.34e-06	-1.26761	-0.952285	0.627801	-1.26761	4.69338	0.0676566	-1.26761	-2.77407	0.011036	TRAF-like family protein
AT5G05320.1	10.068	9.49987	9.33343	32.5226	30.0743	31.844	14.6689	14.1978	14.785	26.2341	20.2491	35.3939	3.32533	1.70743	5.1e-18	3.32533	0.904899	2.06e-05	3.32533	0.59449	0.0205905	3.32533	-0.208014	0.62569	FAD/NAD(P)-binding oxidoreductase family protein
AT2G04110.1	5.55992	5.49211	7.63644	15.4264	12.9274	10.3599	8.50481	7.09892	8.15175	16.4313	12.6872	18.2558	3.3256	1.05365	9.14e-09	3.3256	0.989775	6.05e-08	3.3256	0.349253	0.229587	3.3256	0.285406	0.297175	pseudogene
AT1G05385.1	3.23077	2.59762	3.08543	6.91802	6.82282	7.21797	3.04301	2.61984	3.19676	6.16175	4.3691	7.54449	3.09901	1.23186	4.67e-10	3.09901	1.01351	4.93e-06	3.09901	-0.0050462	1	3.09901	-0.223207	0.582858	photosystem II 11 kDa protein-related
AT3G13650.1	11.8712	15.7342	14.8101	28.3082	29.0868	29.3814	23.6418	23.0715	21.8978	30.1552	29.5754	30.2711	4.00211	1.03201	8.72e-11	4.00211	0.391168	0.0385495	4.00211	0.69349	9.06e-05	4.00211	0.0526517	1	Disease resistance-responsive (dirigent-like protein) family protein
AT1G62500.1	2.02862	1.92966	2.62262	4.5325	4.84779	5.77438	2.4188	1.26766	0.87911	2.70744	1.76444	3.25996	2.82892	1.20063	0.00018304	2.82892	0.740477	0.0960738	2.82892	-0.515924	0.40434	2.82892	-0.975513	0.0114935	Bifunctional inhibitor/lipid-transfer protein/seed storage 2S albumin superfamily protein
AT3G29240.1	33.2093	23.6012	19.6696	59.32	46.5029	52.6487	18.9603	16.3106	19.8199	47.7069	44.5312	40.9824	6.35674	1.05108	1.01e-10	6.35674	1.27263	5.35e-14	6.35674	-0.472674	0.0267306	6.35674	-0.251082	0.371538	Protein of unknown function (DUF179)
AT5G42230.1	0.150268	0.0742178	0.231407	1.51083	1.52616	1.52851	0.546181	0.338044	0.559434	1.12032	1.34434	1.1177	-0.64965	3.25036	1.31e-09	-0.64965	1.28931	0.0193037	-0.64965	1.61976	0.146569	-0.64965	-0.341219	0.731619	serine carboxypeptidase-like 41
AT1G70470.1	9.6923	9.49987	10.9533	23.9348	21.9946	21.6539	13.0303	13.0147	11.3485	19.1388	17.9805	15.6478	4.04529	1.16595	3.73e-20	4.04529	0.497383	0.00082537	4.04529	0.311086	0.112213	4.04529	-0.35745	0.026152	unknown protein
AT5G07060.1	0	0	0.154272	1.03373	1.79548	0.764256	0.0780258	0	0.159838	1.58712	1.51238	0.838276	0.061896	4.3126	7.43e-08	0.061896	3.86176	9.1e-08	0.061896	0.589107	1	0.061896	0.146275	1	CCCH-type zinc fingerfamily protein with RNA-binding domain
AT3G56500.1	0.225402	0.445307	0.53995	1.11324	1.25684	1.61343	0.780258	0.422555	1.27871	1.12032	1.26032	1.02456	-0.366324	1.69416	0.000846577	-0.366324	0.445841	0.551468	-0.366324	1.03121	0.156676	-0.366324	-0.217035	0.916022	serine-rich protein-related
AT4G15270.1	3.0805	3.93354	3.2397	8.1903	8.2592	7.81239	4.36945	4.14104	4.87506	5.88167	6.13354	8.66219	1.52392	1.2392	2.23e-07	1.52392	0.623087	0.0262024	1.52392	0.383561	0.356036	1.52392	-0.232468	0.654466	glucosyltransferase-related
AT2G03310.1	0.150268	0.0742178	0.0771358	0.63614	0.987513	0.424587	0.546181	0.92962	1.03895	0.933599	0.420105	0.651993	2.83907	2.6338	0.000924576	2.83907	-0.33341	0.789987	2.83907	2.93497	9.32e-05	2.83907	-0.0349404	1	unknown protein
AT1G22630.1	1.65295	1.85544	1.38844	0.874692	0.44887	0.339669	3.35511	1.94375	3.51644	1.02696	0.504126	1.30399	4.03693	-1.52143	0.000214555	4.03693	-1.65507	1.42e-06	4.03693	0.850071	0.00996169	4.03693	0.714734	0.403873	unknown protein
AT1G21130.1	52.669	49.8743	57.1576	121.423	97.5843	125.763	90.744	71.4963	104.454	135.559	123.175	157.969	7.17168	1.11033	8.19e-07	7.17168	0.643465	0.0120929	7.17168	0.739948	0.00428604	7.17168	0.273082	0.527428	O-methyltransferase family protein
AT2G37820.1	3.0805	2.59762	2.93116	6.8385	7.36146	6.53863	4.36945	2.36631	4.39555	6.62855	6.72169	7.45135	1.81423	1.26492	1.32e-08	1.81423	0.891603	0.000138665	1.81423	0.377892	0.340463	1.81423	0.00466482	1	Cysteine/Histidine-rich C1 domain family protein
AT5G14920.2	6.01073	5.19524	4.93669	15.6649	18.7628	13.5868	8.58284	7.01441	6.55336	15.0309	12.7712	8.0102	5.52743	1.56954	2.37e-11	5.52743	0.692064	0.0120909	5.52743	0.456455	0.212916	5.52743	-0.420955	0.230476	Gibberellin-regulated family protein
AT2G35550.3	0.525939	0.519524	0.53995	1.27228	2.15457	1.86818	0.702232	0.591577	0.559434	1.21368	0.588147	1.58341	0.0399965	1.7102	5.22e-05	0.0399965	0.835659	0.191852	0.0399965	0.224128	0.973869	0.0399965	-0.649387	0.296443	basic pentacysteine 7
AT1G07440.2	0.676207	0.148436	0.154272	3.1807	2.4239	2.97211	0.312103	0.169022	0.87911	1.58712	1.17629	1.67655	3.97016	3.09634	1.52e-17	3.97016	1.66145	0.00056427	3.97016	0.471935	0.917011	3.97016	-0.961367	0.00509091	NAD(P)-binding Rossmann-fold superfamily protein
AT3G29240.2	34.4865	24.7145	20.5953	62.8188	49.5552	55.8756	20.0526	17.5783	20.699	50.4143	47.3879	43.4041	6.41711	1.07619	2.68e-11	6.41711	1.27438	3.46e-14	6.41711	-0.451625	0.035603	6.41711	-0.253396	0.360448	Protein of unknown function (DUF179)
AT5G37980.1	3.15563	3.56245	5.24523	7.31561	9.51604	8.8314	4.5255	4.98615	4.71523	6.62855	7.81396	7.26506	2.06489	1.09847	8.6e-08	2.06489	0.61178	0.0118947	2.06489	0.251201	0.572427	2.06489	-0.2354	0.542632	Zinc-binding dehydrogenase family protein
AT2G03020.1	0	0.0742178	0.154272	0.795175	0.987513	0.764256	0.156052	0.422555	0.479515	0.840239	1.17629	1.67655	-0.504579	3.32418	3.48e-05	-0.504579	1.78185	0.00222161	-0.504579	2.07771	0.146898	-0.504579	0.534006	0.582631	Heat shock protein HSP20/alpha crystallin family
AT3G16650.1	2.62969	2.00388	3.08543	5.96381	7.09214	5.68946	2.80893	3.21142	3.91604	3.82775	5.46137	3.63253	1.85623	1.277	1.9e-06	1.85623	0.385207	0.323382	1.85623	0.364833	0.490815	1.85623	-0.526822	0.156158	Transducin/WD40 repeat-like superfamily protein
AT1G53885.1	8.11448	8.23817	10.1048	27.5926	29.6254	22.1634	9.12902	8.5356	9.19069	21.3794	17.1403	25.614	3.8251	1.58458	1.71e-22	3.8251	1.25155	3.21e-13	3.8251	0.0231391	1	3.8251	-0.309822	0.20265	Protein of unknown function (DUF581)
AT1G53903.1	8.11448	8.23817	10.0277	27.5926	29.6254	22.1634	9.12902	8.5356	9.19069	21.3794	17.1403	25.614	3.82487	1.58875	1.15e-22	3.82487	1.25153	2.94e-13	3.82487	0.0273155	1	3.82487	-0.30983	0.201912	Protein of unknown function (DUF581)
AT3G49690.1	2.62969	2.67184	3.2397	5.32767	6.64327	5.51963	4.36945	4.73261	4.95498	3.82775	5.62941	6.33364	2.35972	1.02873	1.71e-06	2.35972	0.170902	0.681875	2.35972	0.717759	0.00582716	2.35972	-0.140071	0.831055	myb domain protein 84
AT1G16260.1	1.80322	1.85544	1.00277	4.5325	3.95005	4.67045	3.04301	3.29593	3.59636	6.72191	5.20931	6.79935	3.02012	1.48848	6.53e-07	3.02012	0.90956	0.00154272	3.02012	1.08262	0.00176175	3.02012	0.503644	0.185313	Wall-associated kinase family protein
AT1G61390.1	1.20215	1.2617	0.694222	2.30601	3.41141	2.71735	1.32644	1.26766	1.19879	3.08088	2.18455	1.67655	0.406519	1.39602	1.74e-05	0.406519	0.863742	0.0259719	0.406519	0.25783	0.801957	0.406519	-0.274056	0.72689	S-locus lectin protein kinase family protein
AT3G07500.1	0.976743	1.33592	1.15704	2.86263	2.51367	3.65144	1.87262	1.18315	1.75822	2.24064	2.26857	2.98054	1.52077	1.37297	3.7e-05	1.52077	0.624665	0.133058	1.52077	0.474947	0.440276	1.52077	-0.273138	0.71627	Far-red impaired responsive (FAR1) family protein
AT4G23990.1	0.0751341	0	0	0.477105	0.628418	0.93409	0.0780258	0.169022	0.239757	0.18672	0.420105	0.279425	2.19703	4.29014	4.84e-05	2.19703	0.848074	0.770972	2.19703	2.29469	0.417805	2.19703	-1.14961	0.285505	cellulose synthase like G3
AT1G21130.2	35.6136	28.5738	34.9425	76.0187	63.6497	86.0212	62.4207	50.453	71.2878	90.9325	82.4247	109.814	6.90234	1.18698	3.03e-07	6.90234	0.620205	0.020299	6.90234	0.89371	0.000492296	6.90234	0.32693	0.420495	O-methyltransferase family protein
AT3G49832.1	0.225402	0.148436	0.231407	0.715657	0.807965	1.44359	0.0780258	0.253533	0.0799191	0.466799	0.672169	0.745135	-1.34823	2.23856	0.000349127	-1.34823	2.13871	0.0225429	-1.34823	-0.54714	0.922276	-1.34823	-0.6404	0.570509	pseudogene
AT3G06145.1	1.50268	1.41014	2.00553	5.16864	3.50118	4.67045	1.95065	2.53533	2.23773	2.8008	3.1928	3.63253	1.58181	1.44468	9.8e-09	1.58181	0.519641	0.128484	1.58181	0.447792	0.34815	1.58181	-0.477047	0.189783	unknown protein
AT5G12890.1	6.08586	5.93742	6.40227	12.2457	13.6456	11.7186	8.73889	9.97229	9.43045	13.9106	12.099	16.2067	3.59251	1.02716	3.9e-10	3.59251	0.582607	0.000778756	3.59251	0.609307	0.00176175	3.59251	0.164761	0.614625	UDP-Glycosyltransferase superfamily protein
AT1G27620.1	5.63506	4.97259	6.09373	14.3131	11.5808	10.8694	6.63219	6.84539	6.95296	9.24263	10.5867	9.03476	2.97227	1.14139	8.52e-12	2.97227	0.500995	0.0141682	2.97227	0.291217	0.33179	2.97227	-0.34912	0.13342	HXXXD-type acyl-transferase family protein
AT3G22060.1	3.3059	3.26558	3.0083	6.67947	5.92508	7.72748	72.0959	74.7922	76.7223	24.2736	26.0465	32.1339	4.12033	1.08391	6.32e-05	4.12033	-1.43925	6.38e-12	4.12033	4.54018	2.36e-83	4.12033	2.01676	8.32e-19	Receptor-like protein kinase-related family protein
AT4G34510.1	1.05188	0.593742	1.23417	2.86263	2.51367	2.88719	2.18472	1.94375	1.75822	2.61408	2.94074	3.16682	1.33439	1.51829	7.03e-06	1.33439	0.563934	0.154023	1.33439	1.03004	0.0213546	1.33439	0.0756536	1	3-ketoacyl-CoA synthase 17
AT4G15233.2	7.96421	6.60538	7.3279	23.3781	25.9447	14.8605	9.59718	11.3245	9.03086	16.9915	18.0645	20.1186	3.39477	1.54988	1.05e-12	3.39477	0.88159	0.000201885	3.39477	0.450482	0.167045	3.39477	-0.217764	0.644551	ABC-2 and Plant PDR ABC-type transporter family protein
AT4G30370.1	1.50268	2.15231	1.69699	4.85057	3.50118	6.3688	2.4188	2.53533	2.39757	2.61408	4.62116	4.84337	1.75735	1.45627	3.02e-06	1.75735	0.717846	0.0624115	1.75735	0.454192	0.422612	1.75735	-0.284068	0.682148	RING/U-box superfamily protein
AT5G06640.1	9.39176	11.2069	18.2812	68.6236	45.5154	29.1266	51.263	53.5799	45.5539	59.3769	83.5169	63.8021	4.97162	1.8813	9.11e-05	4.97162	0.458792	0.531675	4.97162	1.95114	0.000137139	4.97162	0.528613	0.563002	Proline-rich extensin-like family protein
AT1G60260.1	2.70483	1.11327	0.771358	4.37346	4.1296	3.05702	3.04301	2.36631	2.87709	3.54767	4.3691	4.93652	3.43892	1.32497	2.81e-07	3.43892	0.628109	0.0206953	3.43892	0.84841	0.0108284	3.43892	0.151552	0.844843	beta glucosidase 5
AT5G10990.1	2.25402	2.59762	2.00553	5.32767	4.21937	6.8783	2.96498	2.2818	1.43854	6.53519	4.7892	6.33364	0.682416	1.2572	3.89e-05	0.682416	1.39199	1.41e-05	0.682416	-0.0359504	1	0.682416	0.0990992	0.997871	SAUR-like auxin-responsive protein family
AT1G07440.1	0.751341	0.222653	0.154272	3.41925	2.69322	3.31178	0.390129	0.169022	0.87911	1.8672	1.17629	1.95598	4.13785	3.03004	1.72e-18	4.13785	1.74697	4.91e-05	4.13785	0.351789	0.926956	4.13785	-0.929698	0.00413506	NAD(P)-binding Rossmann-fold superfamily protein
AT5G38420.1	0.300536	0.66796	0.308543	1.19276	1.88525	1.9531	3.97932	0.591577	1.59838	2.42736	6.04952	2.32855	10.3059	1.93901	4.6e-05	10.3059	0.804232	0.0284912	10.3059	2.25867	6.97e-07	10.3059	1.12309	0.00409617	Ribulose bisphosphate carboxylase (small chain) family protein
AT1G53990.1	2.32916	2.82027	2.08267	6.99754	7.90011	8.57665	3.12103	2.70435	2.87709	5.88167	3.44486	7.26506	1.64605	1.69273	7.59e-07	1.64605	0.922619	0.0227853	1.64605	0.265944	0.823171	1.64605	-0.503956	0.364632	GDSL-motif lipase 3
AT5G22860.1	8.18961	5.34368	4.93669	12.8818	12.9274	11.7186	10.1434	10.7329	9.11078	10.1762	8.40211	9.40732	3.36812	1.02117	0.000662528	3.36812	-0.100225	0.941624	3.36812	0.697535	0.0597265	3.36812	-0.423853	0.393839	Serine carboxypeptidase S28 family protein
AT5G27360.1	0.525939	0.148436	0.154272	2.30601	1.97503	2.03802	0.390129	0.338044	0.239757	1.30704	1.09227	2.04912	3.65835	2.88764	5.22e-11	3.65835	2.15164	3.06e-05	3.65835	0.215586	1	3.65835	-0.518043	0.365364	Major facilitator superfamily protein
AT1G16260.2	1.72808	1.85544	1.00277	4.5325	3.95005	4.50062	3.04301	3.29593	3.59636	6.72191	5.12529	6.79935	2.99655	1.49312	5.65e-07	2.99655	0.902822	0.00157323	2.99655	1.10588	0.00127263	2.99655	0.515515	0.167015	Wall-associated kinase family protein
AT5G40020.1	22.4651	17.6638	26.7661	53.4357	65.6247	62.3293	21.6912	19.0995	23.4163	41.4518	36.7172	30.0848	4.93027	1.43892	1.79e-21	4.93027	0.752712	9.25e-06	4.93027	-0.0575872	0.991622	4.93027	-0.743766	8.68e-06	Pathogenesis-related thaumatin superfamily protein
AT5G54250.1	0.0751341	0.371089	0.0771358	1.51083	1.34661	0.764256	0.390129	0.338044	0.639353	1.49376	1.34434	1.39713	3.65326	2.71403	2.72e-06	3.65326	1.60211	0.00309008	3.65326	1.32996	0.292108	3.65326	0.218248	0.927823	cyclic nucleotide-gated cation channel 4
AT5G66440.1	17.0554	13.1365	17.4327	28.4673	32.5879	34.9859	22.1593	21.8883	18.7011	31.0888	29.4074	28.6877	4.10419	1.0112	1.08e-18	4.10419	0.507006	5.77e-05	4.10419	0.398539	0.00631621	4.10419	-0.105645	0.701369	unknown protein
AT5G66640.2	0.676207	0.445307	0.385679	1.51083	2.69322	2.80227	1.01434	1.35217	1.35862	2.52072	2.60465	1.86284	0.397077	2.186	1.73e-06	0.397077	0.907238	0.0667278	0.397077	1.28461	0.0477588	0.397077	0.0058458	1	DA1-related protein 3
AT2G18350.1	1.72808	2.44919	2.00553	5.80478	6.82282	6.96322	4.60352	3.46495	4.23571	6.06839	6.63766	8.94161	2.69742	1.65606	9.01e-11	2.69742	0.808862	0.00231156	2.69742	0.991429	0.00169327	2.69742	0.144239	0.870635	homeobox protein 24
AT3G16530.1	8.64042	8.01552	17.2784	68.9417	74.8715	94.513	40.4954	54.5096	50.6687	62.1777	72.5942	118.011	5.42668	2.81191	8.14e-19	5.42668	0.795054	0.0291033	5.42668	2.10174	8.94e-11	5.42668	0.0848707	1	Legume lectin family protein
AT5G14920.1	6.98747	6.08586	5.63091	18.4481	21.9048	15.7946	10.1434	7.85952	7.43247	17.5517	14.4516	9.31418	5.72198	1.58322	2.99e-11	5.72198	0.698515	0.0125728	5.72198	0.443658	0.228183	5.72198	-0.440989	0.216807	Gibberellin-regulated family protein
AT5G45730.1	1.12701	1.63279	2.46835	5.24815	4.1296	3.73636	1.87262	1.69022	1.75822	2.89416	2.43661	3.53939	1.32963	1.33069	1.51e-06	1.32963	0.726268	0.0440805	1.32963	0.0310043	1	1.32963	-0.573055	0.124315	Cysteine/Histidine-rich C1 domain family protein
AT3G61920.1	0.225402	0.0742178	0.231407	1.66987	0.987513	0.764256	0.390129	0.253533	0.319676	0.746879	0.840211	0.279425	-0.912912	2.63401	0.000384449	-0.912912	0.935762	0.399096	-0.912912	0.835941	0.798846	-0.912912	-0.860725	0.45015	unknown protein
[truncated: 643 more rows]
