# Supplementary material for: ZAT10 regulates root thermomorphogenesis via very-long-chain fatty acids signaling
Source: Research Square preprint supplement (doi:10.21203/rs.3.rs-7128687/v1), 2025-07-23
Supplement: Supplementary file 3 [file 4255be51e160804f62ce85d3.xlsx]

## Sheet: Sheet1
Dataset S3. Gene ontology (GO) terms of genes overlapping between the ZAT10 cistrome and the set of genes specifically upregulated at 28 °C in Col-0, based on our RNA-seq data.
Gene number	GO terms	Genes
15	GO:0006950 response to stress	CZF1 CAMBP25 SZF1 ACR7 STY46 AT3G07930 MLO1 AT4G33980 AT5G47070 MYC2 ZF14 CYP94C1 PP2-A13 AT1G18740 CIPK23
12	GO:0032502 developmental process	JMJD5 AGL14 AT1G03010 MYC2 NGA2 PTL ZF14 COL9 PAO5 AT4G33980 NAKR1 ZEU1
12	GO:0009628 response to abiotic stimulus	CZF1 CAMBP25 SZF1 ACR7 STY46 JMJD5 AT4G33980 MYC2 ZF14 AT1G18740 CIPK23 COL9
12	GO:0019222 regulation of metabolic process	MYC2 AGL14 AT5G51780 AT4G33980 PTL CZF1 JMJD5 SZF1 NGA2 AT5G07580 CAMBP25 COL9
12	GO:0042221 response to chemical	CZF1 CAMBP25 SZF1 ACR7 STY46 AT1G64710 MYC2 ZF14 AT5G07580 JMJD5 AT4G33980 CIPK23
12	GO:0048856 anatomical structure development	JMJD5 AGL14 AT1G03010 MYC2 NGA2 PTL ZF14 COL9 PAO5 AT4G33980 NAKR1 ZEU1
11	GO:0032501 multicellular organismal process	JMJD5 AGL14 AT1G03010 MYC2 NGA2 PTL ZF14 COL9 AT4G33980 NAKR1 ZEU1
11	GO:0051716 cellular response to stimulus	CZF1 CAMBP25 SZF1 ACR7 STY46 CIPK23 AT1G64710 MYC2 AT3G07930 AT5G07580 JMJD5
9	GO:0000003 reproduction	JMJD5 AGL14 AT1G03010 PTL COL9 NGA2 AT4G33980 NAKR1 ZEU1
9	GO:0022414 reproductive process	JMJD5 AGL14 AT1G03010 PTL COL9 NGA2 AT4G33980 NAKR1 ZEU1
9	GO:0051179 localization	AT5G64870 CIPK23 ZF14 SLAH4 AT2G16980 SULTR3;5 GDU5 AGL14 NAKR1
9	GO:0003006 developmental process involved in reproduction	JMJD5 AGL14 AT1G03010 PTL COL9 NGA2 AT4G33980 NAKR1 ZEU1
8	GO:0051234 establishment of localization	CIPK23 ZF14 SLAH4 AT2G16980 SULTR3;5 GDU5 AGL14 NAKR1
7	GO:0050793 regulation of developmental process	NGA2 ZF14 COL9 JMJD5 AGL14 PAO5 PTL
6	GO:0009056 catabolic process	AT1G64710 ALPHA-VPE AT3G47050 AT4G31290 AT4G08160 PAO5
6	GO:0009653 anatomical structure morphogenesis	AT1G03010 NGA2 ZF14 AGL14 NAKR1 PTL
6	GO:0009719 response to endogenous stimulus	MYC2 AT5G07580 ZF14 JMJD5 AT4G33980 STY46
5	GO:0009605 response to external stimulus	ZF14 CIPK23 MYC2 CZF1 AT5G47070
5	GO:0009607 response to biotic stimulus	ZF14 MLO1 MYC2 CZF1 AT5G47070
5	GO:0065008 regulation of biological quality	SLAH4 ZF14 SVL2 AGL14 NAKR1
4	GO:0023052 signaling	CIPK23 MYC2 AT5G07580 JMJD5
4	GO:0044419 biological process involved in interspecies interaction between organisms	ZF14 MYC2 CZF1 AT5G47070
4	GO:0048583 regulation of response to stimulus	MYC2 COL9 JMJD5 AT4G33980
4	GO:0051707 response to other organism	ZF14 MYC2 CZF1 AT5G47070
4	GO:2000241 regulation of reproductive process	COL9 JMJD5 AT4G33980 PTL
3	GO:0040007 growth	AGL14 PTL AT1G03010
3	GO:0048511 rhythmic process	AT4G33980 COL9 JMJD5
3	GO:0048519 negative regulation of biological process	AT4G33980 COL9 PTL
3	GO:0071840 cellular component organization or biogenesis	MYC2 AT2G15880 STY46
3	GO:0007623 circadian rhythm	AT4G33980 COL9 JMJD5
3	GO:0016043 cellular component organization	MYC2 AT2G15880 STY46
3	GO:0048589 developmental growth	AT1G03010 AGL14 PTL
3	GO:0051239 regulation of multicellular organismal process	COL9 JMJD5 PTL
3	GO:0071554 cell wall organization or biogenesis	AT2G15880 AT4G08160 MYC2
2	GO:0048518 positive regulation of biological process	MYC2 AGL14
2	GO:0009893 positive regulation of metabolic process	MYC2 AGL14
2	GO:0032259 methylation	AT3G10200 JMJD5
2	GO:0032879 regulation of localization	GDU5 AGL14
2	GO:0040008 regulation of growth	AGL14 PTL
2	GO:0042752 regulation of circadian rhythm	AT4G33980 JMJD5
2	GO:0051093 negative regulation of developmental process	COL9 PTL
2	GO:0065009 regulation of molecular function	C/VIF1 MYC2
1	GO:0002376 immune system process	AT5G47070
1	GO:0003008 system process	NAKR1
1	GO:0006955 immune response	AT5G47070
1	GO:0016049 cell growth	AT1G03010
1	GO:0023051 regulation of signaling	JMJD5
1	GO:0033036 macromolecule localization	AT5G64870
1	GO:0044085 cellular component biogenesis	MYC2
1	GO:0044706 multi-multicellular organism process	AT1G03010
1	GO:0048646 anatomical structure formation involved in morphogenesis	ZF14
1	GO:0051641 cellular localization	AT5G64870
1	GO:0098727 maintenance of cell number	AGL14
