# Supplementary material for: ZAT10 regulates root thermomorphogenesis via very-long-chain fatty acids signaling
Source: Research Square preprint supplement (doi:10.21203/rs.3.rs-7128687/v1), 2025-07-23
Supplement: Supplementary file 4 [file 529fe605b515229466e669f3.xlsx]

## Sheet: Fig. 1
Fig. 1a Fatty acids composition					Fig. 1c Primary Root Length					Fig. 1d Reverse transcription-quantitative polymerase chain reaction (RT-qPCR)
Fatty Acid	temperature	genotype	amount		Genotype	temperature	Root Length			Gene	Genotype	temperature	Relative Expression
C16:0	22	Col-0	1.91519		Col-0	22℃	4.853			KCS1	Col-0	22	0.620232
C16:0	22	Col-0	1.73503		Col-0	22℃	5.685			KCS1	Col-0	22	1.07225
C16:0	22	Col-0	1.74067		Col-0	22℃	5.234			KCS1	Col-0	22	1.50816
C16:0	22	kcs1-5	1.29262		Col-0	22℃	4.332			KCS1	Col-0	22	0.626461
C16:0	22	kcs1-5	2.1422		Col-0	22℃	5.689			KCS1	Col-0	22	0.726599
C16:0	22	kcs1-5	3.01307		Col-0	22℃	5.028			KCS1	Col-0	28	0.878061
C16:0	22	kcs1/2/20	2.47539		Col-0	22℃	3.896			KCS1	Col-0	28	0.666248
C16:0	22	kcs1/2/20	2.00801		Col-0	22℃	5.172			KCS1	Col-0	28	0.434299
C16:0	22	kcs1/2/20	1.7162		Col-0	22℃	4.951			KCS1	Col-0	28	0.579983
C16:0	28	Col-0	1.77339		Col-0	22℃	5.187			KCS1	Col-0	28	0.881098
C16:0	28	Col-0	1.22539		Col-0	22℃	5.026			KCS1	kcs1/2/20	22	0.327942
C16:0	28	Col-0	1.52183		Col-0	22℃	4.632			KCS1	kcs1/2/20	22	0.319944
C16:0	28	kcs1-5	1.64731		Col-0	22℃	4.513			KCS1	kcs1/2/20	22	0.306674
C16:0	28	kcs1-5	2.27048		Col-0	22℃	4.634			KCS1	kcs1/2/20	22	0.568927
C16:0	28	kcs1-5	2.8408		Col-0	22℃	4.76			KCS1	kcs1/2/20	22	0.414206
C16:0	28	kcs1/2/20	1.97071		Col-0	22℃	4.848			KCS1	kcs1/2/20	28	0.25404
C16:0	28	kcs1/2/20	1.52488		Col-0	22℃	5.054			KCS1	kcs1/2/20	28	0.223376
C16:0	28	kcs1/2/20	2.44177		Col-0	22℃	5.173			KCS1	kcs1/2/20	28	0.557566
C22:0	22	Col-0	0.155295		Col-0	22℃	3.549			KCS1	kcs1/2/20	28	0.39152
C22:0	22	Col-0	0.0953831		Col-0	22℃	4.248			KCS1	kcs1/2/20	28	0.428827
C22:0	22	Col-0	0.0951298		Col-0	22℃	5.231			KCS2	Col-0	22	0.936057
C22:0	22	kcs1-5	0.0650719		Col-0	22℃	4.884			KCS2	Col-0	22	0.905599
C22:0	22	kcs1-5	0.0408797		Col-0	22℃	4.962			KCS2	Col-0	22	0.561288
C22:0	22	kcs1-5	0.0455849		Col-0	22℃	4.92			KCS2	Col-0	22	0.595375
C22:0	22	kcs1/2/20	0.0221565		Col-0	28℃	6.331			KCS2	Col-0	22	0.564711
C22:0	22	kcs1/2/20	0.0221565		Col-0	28℃	6.462			KCS2	Col-0	28	1.80805
C22:0	22	kcs1/2/20	0.0296652		Col-0	28℃	7.723			KCS2	Col-0	28	1.47226
C22:0	28	Col-0	0.136927		Col-0	28℃	6.812			KCS2	Col-0	28	0.788226
C22:0	28	Col-0	0.0968777		Col-0	28℃	6.606			KCS2	Col-0	28	1.0003
C22:0	28	Col-0	0.126734		Col-0	28℃	6.61			KCS2	Col-0	28	1.28392
C22:0	28	kcs1-5	0.0407181		Col-0	28℃	6.875			KCS2	kcs1/2/20	22	0.257274
C22:0	28	kcs1-5	0.0418558		Col-0	28℃	6.664			KCS2	kcs1/2/20	22	0.33766
C22:0	28	kcs1-5	0.0417298		Col-0	28℃	6.87			KCS2	kcs1/2/20	22	0.331304
C22:0	28	kcs1/2/20	0.027727		Col-0	28℃	6.967			KCS2	kcs1/2/20	22	0.52077
C22:0	28	kcs1/2/20	0.0278491		Col-0	28℃	6.59			KCS2	kcs1/2/20	22	0.453319
C22:0	28	kcs1/2/20	0.0298148		Col-0	28℃	7.25			KCS2	kcs1/2/20	28	0.275144
C18:1	22	Col-0	0.134117		Col-0	28℃	6.003			KCS2	kcs1/2/20	28	0.26502
C18:1	22	Col-0	0.0883167		Col-0	28℃	5.419			KCS2	kcs1/2/20	28	0.611135
C18:1	22	Col-0	0.0793884		Col-0	28℃	5.683			KCS2	kcs1/2/20	28	0.355167
C18:1	22	kcs1-5	0.169872		Col-0	28℃	6.189			KCS2	kcs1/2/20	28	0.682106
C18:1	22	kcs1-5	0.170938		Col-0	28℃	6.168			KCS20	Col-0	22	3.16605
C18:1	22	kcs1-5	0.267537		Col-0	28℃	7.049			KCS20	Col-0	22	2.07926
C18:1	22	kcs1/2/20	0.167847		Col-0	28℃	6.282			KCS20	Col-0	22	2.16571
C18:1	22	kcs1/2/20	0.139523		Col-0	28℃	6.078			KCS20	Col-0	22	2.17337
C18:1	22	kcs1/2/20	0.209401		kcs1-5	22℃	4.166			KCS20	Col-0	22	3.00332
C18:1	28	Col-0	0.16479		kcs1-5	22℃	4.096			KCS20	Col-0	28	3.31887
C18:1	28	Col-0	0.0888919		kcs1-5	22℃	4.123			KCS20	Col-0	28	3.09964
C18:1	28	Col-0	0.108738		kcs1-5	22℃	4.204			KCS20	Col-0	28	2.59309
C18:1	28	kcs1-5	0.125069		kcs1-5	22℃	4.023			KCS20	Col-0	28	2.54963
C18:1	28	kcs1-5	0.219444		kcs1-5	22℃	3.553			KCS20	Col-0	28	4.30919
C18:1	28	kcs1-5	0.261191		kcs1-5	22℃	4.25			KCS20	kcs1/2/20	22	1.34527
C18:1	28	kcs1/2/20	0.00935706		kcs1-5	22℃	4.307			KCS20	kcs1/2/20	22	1.44405
C18:1	28	kcs1/2/20	0.0108708		kcs1-5	22℃	3.878			KCS20	kcs1/2/20	22	1.55652
C18:1	28	kcs1/2/20	0.298927		kcs1-5	22℃	3.526			KCS20	kcs1/2/20	22	2.17799
C18:3	22	Col-0	0.362512		kcs1-5	22℃	3.084			KCS20	kcs1/2/20	22	1.8347
C18:3	22	Col-0	0.426892		kcs1-5	22℃	4.11			KCS20	kcs1/2/20	28	1.1089
C18:3	22	Col-0	0.428042		kcs1-5	22℃	4.202			KCS20	kcs1/2/20	28	1.08651
C18:3	22	kcs1-5	0.334243		kcs1-5	22℃	4.012			KCS20	kcs1/2/20	28	2.38602
C18:3	22	kcs1-5	0.445522		kcs1-5	22℃	4.227			KCS20	kcs1/2/20	28	1.75101
C18:3	22	kcs1-5	0.637807		kcs1-5	22℃	4.342			KCS20	kcs1/2/20	28	2.49229
C18:3	22	kcs1/2/20	0.536897		kcs1-5	22℃	5.024
C18:3	22	kcs1/2/20	0.442883		kcs1-5	22℃	3.946
C18:3	22	kcs1/2/20	0.419835		kcs1-5	22℃	4.187			Student's t-test
C18:3	28	Col-0	0.348405		kcs1-5	22℃	4.614			KCS1
C18:3	28	Col-0	0.218317		kcs1-5	22℃	4.346				Df	t value	p-value
C18:3	28	Col-0	0.231251		kcs1-5	22℃	4.409			Col-0 22℃ vs Col-0 28℃	8	1.16458	0.277739
C18:3	28	kcs1-5	0.263443		kcs1-5	22℃	4.22			kcs1/2/20 22℃ vs kcs1/2/20 28℃	8	0.210636	0.838438
C18:3	28	kcs1-5	0.405969		kcs1-5	22℃	4.177
C18:3	28	kcs1-5	0.465702		kcs1-5	22℃	4.868
C18:3	28	kcs1/2/20	0.313978		kcs1-5	22℃	4.305			KCS2
C18:3	28	kcs1/2/20	0.284069		kcs1-5	22℃	4.499				Df	t value	p-value
C18:3	28	kcs1/2/20	0.413565		kcs1-5	28℃	6.594			Col-0 22℃ vs Col-0 28℃	8	0.210636	0.0223828
C18:0	22	Col-0	2.10655		kcs1-5	28℃	6.656			kcs1/2/20 22℃ vs kcs1/2/20 28℃	8	0.58044	0.577598
C18:0	22	Col-0	2.07937		kcs1-5	28℃	6.255
C18:0	22	Col-0	2.35723		kcs1-5	28℃	6.461
C18:0	22	kcs1-5	1.20298		kcs1-5	28℃	6.463			KCS20
C18:0	22	kcs1-5	1.19021		kcs1-5	28℃	6.544				Df	t value	p-value
C18:0	22	kcs1-5	1.87948		kcs1-5	28℃	4.616			Col-0 22℃ vs Col-0 28℃	8	-1.65872	0.135757
C18:0	22	kcs1/2/20	2.17027		kcs1-5	28℃	6.401			kcs1/2/20 22℃ vs kcs1/2/20 28℃	8	-0.27736	0.788536
C18:0	22	kcs1/2/20	1.51043		kcs1-5	28℃	5.744
C18:0	22	kcs1/2/20	1.25266		kcs1-5	28℃	4.957
C18:0	28	Col-0	2.72942		kcs1-5	28℃	6.02
C18:0	28	Col-0	1.71034		kcs1-5	28℃	6.775
C18:0	28	Col-0	2.1829		kcs1-5	28℃	5.903
C18:0	28	kcs1-5	1.23003		kcs1-5	28℃	6.68
C18:0	28	kcs1-5	1.50394		kcs1-5	28℃	7.096
C18:0	28	kcs1-5	2.27959		kcs1-5	28℃	6.359
C18:0	28	kcs1/2/20	1.89193		kcs1-5	28℃	6.222
C18:0	28	kcs1/2/20	1.73042		kcs1-5	28℃	6.233
C18:0	28	kcs1/2/20	2.17134		kcs1/2/20	22℃	3.301
C24:0	22	Col-0	0.0818538		kcs1/2/20	22℃	2.249
C24:0	22	Col-0	0.0618664		kcs1/2/20	22℃	5.316
C24:0	22	Col-0	0.0610479		kcs1/2/20	22℃	4.533
C24:0	22	kcs1-5	0.0836023		kcs1/2/20	22℃	3.301
C24:0	22	kcs1-5	0.0532464		kcs1/2/20	22℃	4.688
C24:0	22	kcs1-5	0.0616355		kcs1/2/20	22℃	4.341
C24:0	22	kcs1/2/20	0.0272231		kcs1/2/20	22℃	4.644
C24:0	22	kcs1/2/20	0.0376827		kcs1/2/20	22℃	4.62
C24:0	22	kcs1/2/20	0.0393456		kcs1/2/20	22℃	4.516
C24:0	28	Col-0	0.0733123		kcs1/2/20	22℃	3.834
C24:0	28	Col-0	0.0531949		kcs1/2/20	22℃	3.688
C24:0	28	Col-0	0.0660599		kcs1/2/20	22℃	1.599
C24:0	28	kcs1-5	0.0460112		kcs1/2/20	22℃	1.525
C24:0	28	kcs1-5	0.0478982		kcs1/2/20	22℃	1.53
C24:0	28	kcs1-5	0.0496098		kcs1/2/20	22℃	5.129
C24:0	28	kcs1/2/20	0.0293359		kcs1/2/20	22℃	2.671
C24:0	28	kcs1/2/20	0.0306119		kcs1/2/20	22℃	4.187
C24:0	28	kcs1/2/20	0.0324775		kcs1/2/20	22℃	5.083
C18:2	22	Col-0	0.754073		kcs1/2/20	22℃	3.549
C18:2	22	Col-0	0.633095		kcs1/2/20	22℃	4.172
C18:2	22	Col-0	0.635047		kcs1/2/20	22℃	3.259
C18:2	22	kcs1-5	0.572832		kcs1/2/20	22℃	2.957
C18:2	22	kcs1-5	0.7714		kcs1/2/20	22℃	2.205
C18:2	22	kcs1-5	1.14373		kcs1/2/20	22℃	4.721
C18:2	22	kcs1/2/20	0.762217		kcs1/2/20	22℃	4.462
C18:2	22	kcs1/2/20	0.637307		kcs1/2/20	22℃	3.733
C18:2	22	kcs1/2/20	0.566174		kcs1/2/20	22℃	4.144
C18:2	28	Col-0	0.995733		kcs1/2/20	22℃	4.428
C18:2	28	Col-0	0.524543		kcs1/2/20	22℃	2.575
C18:2	28	Col-0	0.610013		kcs1/2/20	22℃	3.164
C18:2	28	kcs1-5	0.685285		kcs1/2/20	22℃	4.275
C18:2	28	kcs1-5	0.97084		kcs1/2/20	28℃	5.921
C18:2	28	kcs1-5	1.26674		kcs1/2/20	28℃	4.611
C18:2	28	kcs1/2/20	0.748869		kcs1/2/20	28℃	5.902
C18:2	28	kcs1/2/20	0.656767		kcs1/2/20	28℃	6.589
C18:2	28	kcs1/2/20	0.988256		kcs1/2/20	28℃	6.222
C20:0	22	Col-0	0.0338517		kcs1/2/20	28℃	5.38
C20:0	22	Col-0	0.0300426		kcs1/2/20	28℃	6.13
C20:0	22	Col-0	0.0235517		kcs1/2/20	28℃	6.011
C20:0	22	kcs1-5	0.0280417		kcs1/2/20	28℃	3.355
C20:0	22	kcs1-5	0.018391		kcs1/2/20	28℃	5.825
C20:0	22	kcs1-5	0.0275758		kcs1/2/20	28℃	5.351
C20:0	22	kcs1/2/20	0.0236288		kcs1/2/20	28℃	4.245
C20:0	22	kcs1/2/20	0.0103377		kcs1/2/20	28℃	4.863
C20:0	22	kcs1/2/20	0.0233798		kcs1/2/20	28℃	1.555
C20:0	28	Col-0	0.0283453		kcs1/2/20	28℃	3.14
C20:0	28	Col-0	0.0214108		kcs1/2/20	28℃	1.305
C20:0	28	Col-0	0.0266337		kcs1/2/20	28℃	6.255
C20:0	28	kcs1-5	0.0177525		kcs1/2/20	28℃	5.518
C20:0	28	kcs1-5	0.015925		kcs1/2/20	28℃	5.478
C20:0	28	kcs1-5	0.0188248		kcs1/2/20	28℃	2.46
C20:0	28	kcs1/2/20	0.0246124		kcs1/2/20	28℃	4.699
C20:0	28	kcs1/2/20	0.0285892		kcs1/2/20	28℃	2.051
C20:0	28	kcs1/2/20	0.0297285		kcs1/2/20	28℃	3.95
					kcs1/2/20	28℃	5.21
					kcs1/2/20	28℃	5.272
					kcs1/2/20	28℃	5.529
One-way ANOVA					kcs1/2/20	28℃	3.516
22 ℃					kcs1/2/20	28℃	4.1
Fatty Acid: C16:0					kcs1/2/20	28℃	5.67
					kcs1/2/20	28℃	2.264
	Df	F value	p-value		kcs1/2/20	28℃	5.718
Genotype	2	0.34	0.724		kcs1/2/20	28℃	4.054
Residuals	6				kcs1/2/20	28℃	3.219
					kcs1/2/20	28℃	4.203
					kcs1/2/20	28℃	3.614
Fatty Acid: C18:0					kcs1/2/20	28℃	5.233
					kcs1/2/20	28℃	4.415
	Df	F value	p-value		kcs1/2/20	28℃	3.392
Genotype	2	3.385	0.104		kcs1/2/20	28℃	6.51
Residuals	6				kcs1/2/20	28℃	2.181
					kcs1/2/20	28℃	4.106
					kcs1/2/20	28℃	4.383
Fatty Acid: C18:1					kcs1/2/20	28℃	2.113
					kcs1/2/20	28℃	2.848
	Df	F value	p-value		kcs1/2/20	28℃	2.261
Genotype	2	4.722	0.0586		kcs1/2/20	28℃	4.972
Residuals	6				kcs1/2/20	28℃	6.142
					kcs1/2/20	28℃	3.301
					kcs1/2/20	28℃	3.234
Fatty Acid: C18:2					kcs1/2/20	28℃	1.86
					KCS1/kcs1/2/20 #1	22℃	4.743
	Df	F value	p-value		KCS1/kcs1/2/20 #1	22℃	3.924
Genotype	2	0.833	0.48		KCS1/kcs1/2/20 #1	22℃	4.816
Residuals	6				KCS1/kcs1/2/20 #1	22℃	4.433
					KCS1/kcs1/2/20 #1	22℃	4.496
					KCS1/kcs1/2/20 #1	22℃	4.539
Fatty Acid: C18:3					KCS1/kcs1/2/20 #1	22℃	3.167
					KCS1/kcs1/2/20 #1	22℃	4.349
	Df	F value	p-value		KCS1/kcs1/2/20 #1	22℃	4.866
Genotype	2	0.425	0.672		KCS1/kcs1/2/20 #1	22℃	4.481
Residuals	6				KCS1/kcs1/2/20 #1	22℃	4.554
					KCS1/kcs1/2/20 #1	22℃	4.01
					KCS1/kcs1/2/20 #1	22℃	4.215
Fatty Acid: C20:0					KCS1/kcs1/2/20 #1	22℃	4.217
					KCS1/kcs1/2/20 #1	22℃	3.815
	Df	F value	p-value		KCS1/kcs1/2/20 #1	22℃	5.656
Genotype	2	1.985	0.218		KCS1/kcs1/2/20 #1	22℃	3.906
Residuals	6				KCS1/kcs1/2/20 #1	22℃	4.278
					KCS1/kcs1/2/20 #1	22℃	4.225
					KCS1/kcs1/2/20 #1	22℃	3.977
Fatty Acid: C22:0					KCS1/kcs1/2/20 #1	22℃	4.726
					KCS1/kcs1/2/20 #1	22℃	4.235
	Df	F value	p-value		KCS1/kcs1/2/20 #1	22℃	3.976
Genotype	2	14.16	0.00534		KCS1/kcs1/2/20 #1	22℃	4.431
Residuals	6				KCS1/kcs1/2/20 #1	22℃	5.069
					KCS1/kcs1/2/20 #1	22℃	3.864
					KCS1/kcs1/2/20 #1	22℃	4.956
Fatty Acid: C24:0					KCS1/kcs1/2/20 #1	22℃	4.422
					KCS1/kcs1/2/20 #1	22℃	3.886
	Df	F value	p-value		KCS1/kcs1/2/20 #1	28℃	6.494
Genotype	2	7.412	0.0239		KCS1/kcs1/2/20 #1	28℃	6.485
Residuals	6				KCS1/kcs1/2/20 #1	28℃	6.122
					KCS1/kcs1/2/20 #1	28℃	5.927
28℃					KCS1/kcs1/2/20 #1	28℃	4.068
Fatty Acid: C16:0					KCS1/kcs1/2/20 #1	28℃	5.06
					KCS1/kcs1/2/20 #1	28℃	5.693
	Df	F value	p-value		KCS1/kcs1/2/20 #1	28℃	4.615
Genotype	2	1.997	0.216		KCS1/kcs1/2/20 #1	28℃	4.938
Residuals	6				KCS1/kcs1/2/20 #1	28℃	6.469
					KCS1/kcs1/2/20 #1	28℃	5.859
					KCS1/kcs1/2/20 #1	28℃	4.428
Fatty Acid: C18:0					KCS1/kcs1/2/20 #1	28℃	5.216
					KCS1/kcs1/2/20 #1	28℃	6.243
	Df	F value	p-value		KCS1/kcs1/2/20 #1	28℃	6.527
Genotype	2	1.068	0.401		KCS1/kcs1/2/20 #1	28℃	5.422
Residuals	6				KCS1/kcs1/2/20 #1	28℃	5.732
					KCS1/kcs1/2/20 #2	22℃	4.477
					KCS1/kcs1/2/20 #2	22℃	4.929
Fatty Acid: C18:1					KCS1/kcs1/2/20 #2	22℃	3.368
					KCS1/kcs1/2/20 #2	22℃	4.984
	Df	F value	p-value		KCS1/kcs1/2/20 #2	22℃	4.079
Genotype	2	0.697	0.534		KCS1/kcs1/2/20 #2	22℃	5.166
Residuals	6				KCS1/kcs1/2/20 #2	22℃	3.458
					KCS1/kcs1/2/20 #2	22℃	5.021
					KCS1/kcs1/2/20 #2	22℃	3.656
Fatty Acid: C18:2					KCS1/kcs1/2/20 #2	22℃	4.764
					KCS1/kcs1/2/20 #2	22℃	3.621
	Df	F value	p-value		KCS1/kcs1/2/20 #2	22℃	3.263
Genotype	2	0.921	0.448		KCS1/kcs1/2/20 #2	22℃	4.719
Residuals	6				KCS1/kcs1/2/20 #2	22℃	4.021
					KCS1/kcs1/2/20 #2	22℃	4.077
					KCS1/kcs1/2/20 #2	22℃	4.973
Fatty Acid: C18:3					KCS1/kcs1/2/20 #2	22℃	4.014
					KCS1/kcs1/2/20 #2	22℃	5.13
	Df	F value	p-value		KCS1/kcs1/2/20 #2	22℃	3.932
Genotype	2	1.417	0.313		KCS1/kcs1/2/20 #2	22℃	4.692
Residuals	6				KCS1/kcs1/2/20 #2	22℃	4.895
					KCS1/kcs1/2/20 #2	28℃	6.828
					KCS1/kcs1/2/20 #2	28℃	5.192
Fatty Acid: C20:0					KCS1/kcs1/2/20 #2	28℃	4.759
					KCS1/kcs1/2/20 #2	28℃	6.064
	Df	F value	p-value		KCS1/kcs1/2/20 #2	28℃	5.191
Genotype	2	11.45	0.00896		KCS1/kcs1/2/20 #2	28℃	7.909
Residuals	6				KCS1/kcs1/2/20 #2	28℃	5.755
					KCS1/kcs1/2/20 #2	28℃	5.91
					KCS1/kcs1/2/20 #2	28℃	6.878
Fatty Acid: C22:0					KCS1/kcs1/2/20 #2	28℃	6.568
					KCS1/kcs1/2/20 #2	28℃	6.055
	Df	F value	p-value		KCS1/kcs1/2/20 #2	28℃	5.353
Genotype	2	50.97	0.000172		KCS1/kcs1/2/20 #2	28℃	6.829
Residuals	6				KCS1/kcs1/2/20 #2	28℃	5.825
					KCS1/kcs1/2/20 #2	28℃	6.431
					KCS1/kcs1/2/20 #2	28℃	6.873
Fatty Acid: C24:0					KCS1/kcs1/2/20 #2	28℃	7.374
					KCS1/kcs1/2/20 #2	28℃	6.842
	Df	F value	p-value		KCS1/kcs1/2/20 #2	28℃	3.637
Genotype	2	22.89	0.00156		KCS1/kcs1/2/20 #2	28℃	5.158
Residuals	6				KCS1/kcs1/2/20 #2	28℃	4.428
					KCS1/kcs1/2/20 #2	28℃	6.336
Tukey's multiple comparisons test					KCS1/kcs1/2/20 #2	28℃	6.237
22℃					KCS1/kcs1/2/20 #2	28℃	6.532
Fatty Acid : C22:0					KCS1/kcs1/2/20 #2	28℃	5.434
Comparison	adjusted p-value				KCS1/kcs1/2/20 #2	28℃	6.102
kcs1-5 vs Col-0	0.0237534				KCS1/kcs1/2/20 #2	28℃	6.579
kcs1/2 vs Col-0	0.00500626				KCS1/kcs1/2/20 #2	28℃	5.553
kcs1/2 vs kcs1-5	0.366444				KCS1/kcs1/2/20 #2	28℃	6.702
					KCS1/kcs1/2/20 #2	28℃	6.09
Fatty Acid : C24:0					KCS2/kcs1/2/20 #1	22℃	4.79
Comparison	adjusted p-value				KCS2/kcs1/2/20 #1	22℃	4.594
kcs1-5 vs Col-0	0.974983				KCS2/kcs1/2/20 #1	22℃	4.975
kcs1/2 vs Col-0	0.0320189				KCS2/kcs1/2/20 #1	22℃	4.73
kcs1/2 vs kcs1-5	0.0414466				KCS2/kcs1/2/20 #1	22℃	4.058
					KCS2/kcs1/2/20 #1	22℃	4.822
28℃					KCS2/kcs1/2/20 #1	22℃	4.26
Fatty Acid : C20:0					KCS2/kcs1/2/20 #1	22℃	4.523
Comparison	adjusted p-value				KCS2/kcs1/2/20 #1	22℃	4.995
kcs1-5 vs Col-0	0.0274258				KCS2/kcs1/2/20 #1	22℃	3.855
kcs1/2 vs Col-0	0.61647				KCS2/kcs1/2/20 #1	22℃	4.741
kcs1/2 vs kcs1-5	0.00931116				KCS2/kcs1/2/20 #1	22℃	4.777
					KCS2/kcs1/2/20 #1	22℃	4.945
Fatty Acid : C22:0					KCS2/kcs1/2/20 #1	22℃	4.664
Comparison	adjusted p-value				KCS2/kcs1/2/20 #1	22℃	4.766
kcs1-5 vs Col-0	0.000495395				KCS2/kcs1/2/20 #1	22℃	5.656
kcs1/2 vs Col-0	0.000211496				KCS2/kcs1/2/20 #1	22℃	4.14
kcs1/2 vs kcs1-5	0.436049				KCS2/kcs1/2/20 #1	22℃	4.222
					KCS2/kcs1/2/20 #1	22℃	4.817
Fatty Acid : C24:0					KCS2/kcs1/2/20 #1	22℃	4.423
Comparison	adjusted p-value				KCS2/kcs1/2/20 #1	22℃	4.323
kcs1-5 vs Col-0	0.0370826				KCS2/kcs1/2/20 #1	22℃	4.625
kcs1/2 vs Col-0	0.00124026				KCS2/kcs1/2/20 #1	22℃	4.186
kcs1/2 vs kcs1-5	0.0314376				KCS2/kcs1/2/20 #1	22℃	4.872
					KCS2/kcs1/2/20 #1	22℃	4.393
					KCS2/kcs1/2/20 #1	22℃	4.911
					KCS2/kcs1/2/20 #1	22℃	5.006
					KCS2/kcs1/2/20 #1	22℃	4.76
					KCS2/kcs1/2/20 #1	22℃	4.171
					KCS2/kcs1/2/20 #1	22℃	4.945
					KCS2/kcs1/2/20 #1	28℃	6.789
					KCS2/kcs1/2/20 #1	28℃	5.081
					KCS2/kcs1/2/20 #1	28℃	6.419
					KCS2/kcs1/2/20 #1	28℃	7.005
					KCS2/kcs1/2/20 #1	28℃	6.69
					KCS2/kcs1/2/20 #1	28℃	5.899
					KCS2/kcs1/2/20 #1	28℃	5.075
					KCS2/kcs1/2/20 #1	28℃	6.078
					KCS2/kcs1/2/20 #1	28℃	6.428
					KCS2/kcs1/2/20 #1	28℃	5.339
					KCS2/kcs1/2/20 #1	28℃	6.346
					KCS2/kcs1/2/20 #1	28℃	6.118
					KCS2/kcs1/2/20 #1	28℃	6.069
					KCS2/kcs1/2/20 #1	28℃	6.275
					KCS2/kcs1/2/20 #1	28℃	5.746
					KCS2/kcs1/2/20 #1	28℃	5.612
					KCS2/kcs1/2/20 #1	28℃	7.247
					KCS2/kcs1/2/20 #1	28℃	6.652
					KCS2/kcs1/2/20 #1	28℃	6.858
					KCS2/kcs1/2/20 #1	28℃	6.015
					KCS2/kcs1/2/20 #1	28℃	6.628
					KCS2/kcs1/2/20 #1	28℃	5.748
					KCS2/kcs1/2/20 #1	28℃	6.297
					KCS2/kcs1/2/20 #1	28℃	6.164
					KCS2/kcs1/2/20 #1	28℃	5.871
					KCS2/kcs1/2/20 #1	28℃	6.114
					KCS2/kcs1/2/20 #1	28℃	6.947
					KCS2/kcs1/2/20 #2	22℃	5.401
					KCS2/kcs1/2/20 #2	22℃	5.43
					KCS2/kcs1/2/20 #2	22℃	4.951
					KCS2/kcs1/2/20 #2	22℃	4.35
					KCS2/kcs1/2/20 #2	22℃	4.56
					KCS2/kcs1/2/20 #2	22℃	5.439
					KCS2/kcs1/2/20 #2	22℃	5.821
					KCS2/kcs1/2/20 #2	22℃	4.078
					KCS2/kcs1/2/20 #2	22℃	5.224
					KCS2/kcs1/2/20 #2	22℃	3.875
					KCS2/kcs1/2/20 #2	22℃	4.404
					KCS2/kcs1/2/20 #2	22℃	3.826
					KCS2/kcs1/2/20 #2	28℃	5.37
					KCS2/kcs1/2/20 #2	28℃	4.392
					KCS2/kcs1/2/20 #2	28℃	6.95
					KCS2/kcs1/2/20 #2	28℃	5.571
					KCS2/kcs1/2/20 #2	28℃	5.991
					KCS2/kcs1/2/20 #2	28℃	5.625
					KCS2/kcs1/2/20 #2	28℃	6.052
					KCS2/kcs1/2/20 #2	28℃	4.636
					KCS2/kcs1/2/20 #2	28℃	4.799
					KCS2/kcs1/2/20 #2	28℃	5.108
					KCS2/kcs1/2/20 #2	28℃	5.454
					KCS2/kcs1/2/20 #2	28℃	5.9
					KCS2/kcs1/2/20 #2	28℃	4.818
					KCS2/kcs1/2/20 #2	28℃	5.927
					KCS2/kcs1/2/20 #2	28℃	5.808
					KCS2/kcs1/2/20 #2	28℃	7.186
					KCS2/kcs1/2/20 #2	28℃	5.408
					KCS2/kcs1/2/20 #2	28℃	6.881
					KCS2/kcs1/2/20 #2	28℃	5.605
					KCS2/kcs1/2/20 #2	28℃	5.226
					KCS2/kcs1/2/20 #2	28℃	6.632
					One-way ANOVA
					Comparison	Df	F value	p-value
					Genotype	13	31.05	< 2 × 10⁻¹⁶
					Residuals	344
					Tukey's multiple comparisons test
						Comparison	adjusted p-value
						Col-0 28℃ vs Col-0 22℃	1.27669e-08
						kcs1-5 22℃ vs Col-0 22℃	0.188911
						kcs1-5 28℃ vs Col-0 22℃	2.51425e-05
						kcs1/2/20 22℃ vs Col-0 22℃	5.09742e-05
						kcs1/2/20 28℃ vs Col-0 22℃	0.379929
						KCS1/kcs1/2/20 #1 22℃ vs Col-0 22℃	0.658239
						KCS1/kcs1/2/20 #1 28℃ vs Col-0 22℃	0.212254
						KCS1/kcs1/2/20 #2 22℃ vs Col-0 22℃	0.749155
						KCS1/kcs1/2/20 #2 28℃ vs Col-0 22℃	2.9278e-05
						KCS2/kcs1/2/20 #1 22℃ vs Col-0 22℃	0.999529
						KCS2/kcs1/2/20 #1 28℃ vs Col-0 22℃	1.78566e-06
						KCS2/kcs1/2/20 #2 22℃ vs Col-0 22℃	1
						KCS2/kcs1/2/20 #2 28℃ vs Col-0 22℃	0.0603575
						kcs1-5 22℃ vs Col-0 28℃	0
						kcs1-5 28℃ vs Col-0 28℃	0.997274
						kcs1/2/20 22℃ vs Col-0 28℃	0
						kcs1/2/20 28℃ vs Col-0 28℃	0
						KCS1/kcs1/2/20 #1 22℃ vs Col-0 28℃	0
						KCS1/kcs1/2/20 #1 28℃ vs Col-0 28℃	0.0546647
						KCS1/kcs1/2/20 #2 22℃ vs Col-0 28℃	0
						KCS1/kcs1/2/20 #2 28℃ vs Col-0 28℃	0.766301
						KCS2/kcs1/2/20 #1 22℃ vs Col-0 28℃	3.87701e-12
						KCS2/kcs1/2/20 #1 28℃ vs Col-0 28℃	0.988664
						KCS2/kcs1/2/20 #2 22℃ vs Col-0 28℃	2.03636e-06
						KCS2/kcs1/2/20 #2 28℃ vs Col-0 28℃	0.0749108
						kcs1-5 28℃ vs kcs1-5 22℃	6.03739e-13
						kcs1/2/20 22℃ vs kcs1-5 22℃	0.655563
						kcs1/2/20 28℃ vs kcs1-5 22℃	0.999974
						KCS1/kcs1/2/20 #1 22℃ vs kcs1-5 22℃	0.999942
						KCS1/kcs1/2/20 #1 28℃ vs kcs1-5 22℃	6.03584e-06
						KCS1/kcs1/2/20 #2 22℃ vs kcs1-5 22℃	0.999987
						KCS1/kcs1/2/20 #2 28℃ vs kcs1-5 22℃	0
						KCS2/kcs1/2/20 #1 22℃ vs kcs1-5 22℃	0.729518
						KCS2/kcs1/2/20 #1 28℃ vs kcs1-5 22℃	0
						KCS2/kcs1/2/20 #2 22℃ vs kcs1-5 22℃	0.712014
						KCS2/kcs1/2/20 #2 28℃ vs kcs1-5 22℃	1.57082e-07
						kcs1/2/20 22℃ vs kcs1-5 28℃	0
						kcs1/2/20 28℃ vs kcs1-5 28℃	0
						KCS1/kcs1/2/20 #1 22℃ vs kcs1-5 28℃	7.85034e-11
						KCS1/kcs1/2/20 #1 28℃ vs kcs1-5 28℃	0.651011
						KCS1/kcs1/2/20 #2 22℃ vs kcs1-5 28℃	1.47572e-09
						KCS1/kcs1/2/20 #2 28℃ vs kcs1-5 28℃	0.999988
						KCS2/kcs1/2/20 #1 22℃ vs kcs1-5 28℃	5.76879e-08
						KCS2/kcs1/2/20 #1 28℃ vs kcs1-5 28℃	1
						KCS2/kcs1/2/20 #2 22℃ vs kcs1-5 28℃	0.000469624
						KCS2/kcs1/2/20 #2 28℃ vs kcs1-5 28℃	0.767212
						kcs1/2/20 28℃ vs kcs1/2/20 22℃	0.0665351
						KCS1/kcs1/2/20 #1 22℃ vs kcs1/2/20 22℃	0.130021
						KCS1/kcs1/2/20 #1 28℃ vs kcs1/2/20 22℃	2.92143e-11
						KCS1/kcs1/2/20 #2 22℃ vs kcs1/2/20 22℃	0.261382
						KCS1/kcs1/2/20 #2 28℃ vs kcs1/2/20 22℃	0
						KCS2/kcs1/2/20 #1 22℃ vs kcs1/2/20 22℃	0.00132224
						KCS2/kcs1/2/20 #1 28℃ vs kcs1/2/20 22℃	0
						KCS2/kcs1/2/20 #2 22℃ vs kcs1/2/20 22℃	0.0120299
						KCS2/kcs1/2/20 #2 28℃ vs kcs1/2/20 22℃	0
						KCS1/kcs1/2/20 #1 22℃ vs kcs1/2/20 28℃	1
						KCS1/kcs1/2/20 #1 28℃ vs kcs1/2/20 28℃	8.44054e-06
						KCS1/kcs1/2/20 #2 22℃ vs kcs1/2/20 28℃	1
						KCS1/kcs1/2/20 #2 28℃ vs kcs1/2/20 28℃	0
						KCS2/kcs1/2/20 #1 22℃ vs kcs1/2/20 28℃	0.946472
						KCS2/kcs1/2/20 #1 28℃ vs kcs1/2/20 28℃	0
						KCS2/kcs1/2/20 #2 22℃ vs kcs1/2/20 28℃	0.91594
						KCS2/kcs1/2/20 #2 28℃ vs kcs1/2/20 28℃	1.1582e-07
						KCS1/kcs1/2/20 #1 28℃ vs KCS1/kcs1/2/20 #1 22℃	0.000131276
						KCS1/kcs1/2/20 #2 22℃ vs KCS1/kcs1/2/20 #1 22℃	1
						KCS1/kcs1/2/20 #2 28℃ vs KCS1/kcs1/2/20 #1 22℃	7.75102e-12
						KCS2/kcs1/2/20 #1 22℃ vs KCS1/kcs1/2/20 #1 22℃	0.991895
						KCS2/kcs1/2/20 #1 28℃ vs KCS1/kcs1/2/20 #1 22℃	0
						KCS2/kcs1/2/20 #2 22℃ vs KCS1/kcs1/2/20 #1 22℃	0.969649
						KCS2/kcs1/2/20 #2 28℃ vs KCS1/kcs1/2/20 #1 22℃	5.4228e-06
						KCS1/kcs1/2/20 #2 22℃ vs KCS1/kcs1/2/20 #1 28℃	0.000473995
						KCS1/kcs1/2/20 #2 28℃ vs KCS1/kcs1/2/20 #1 28℃	0.901618
						KCS2/kcs1/2/20 #1 22℃ vs KCS1/kcs1/2/20 #1 28℃	0.0110907
						KCS2/kcs1/2/20 #1 28℃ vs KCS1/kcs1/2/20 #1 28℃	0.55186
						KCS2/kcs1/2/20 #2 22℃ vs KCS1/kcs1/2/20 #1 28℃	0.335728
						KCS2/kcs1/2/20 #2 28℃ vs KCS1/kcs1/2/20 #1 28℃	1
						KCS1/kcs1/2/20 #2 28℃ vs KCS1/kcs1/2/20 #2 22℃	5.04468e-10
						KCS2/kcs1/2/20 #1 22℃ vs KCS1/kcs1/2/20 #2 22℃	0.995402
						KCS2/kcs1/2/20 #1 28℃ vs KCS1/kcs1/2/20 #2 22℃	2.10002e-11
						KCS2/kcs1/2/20 #2 22℃ vs KCS1/kcs1/2/20 #2 22℃	0.977136
						KCS2/kcs1/2/20 #2 28℃ vs KCS1/kcs1/2/20 #2 22℃	3.43812e-05
						KCS2/kcs1/2/20 #1 22℃ vs KCS1/kcs1/2/20 #2 28℃	1.97911e-08
						KCS2/kcs1/2/20 #1 28℃ vs KCS1/kcs1/2/20 #2 28℃	0.999986
						KCS2/kcs1/2/20 #2 22℃ vs KCS1/kcs1/2/20 #2 28℃	0.00105185
						KCS2/kcs1/2/20 #2 28℃ vs KCS1/kcs1/2/20 #2 28℃	0.961465
						KCS2/kcs1/2/20 #1 28℃ vs KCS2/kcs1/2/20 #1 22℃	7.72595e-10
						KCS2/kcs1/2/20 #2 22℃ vs KCS2/kcs1/2/20 #1 22℃	1
						KCS2/kcs1/2/20 #2 28℃ vs KCS2/kcs1/2/20 #1 22℃	0.00114037
						KCS2/kcs1/2/20 #2 22℃ vs KCS2/kcs1/2/20 #1 28℃	0.00012905
						KCS2/kcs1/2/20 #2 28℃ vs KCS2/kcs1/2/20 #1 28℃	0.674646
						KCS2/kcs1/2/20 #2 28℃ vs KCS2/kcs1/2/20 #2 22℃	0.151747

## Sheet: Fig. 2
Fig. 2d Reverse transcription-quantitative polymerase chain reaction (RT-qPCR)
Gene	Genotype/Condition	Relative Expression	temperature
ZAT10	Col-0	1.07467	22℃
ZAT10	Col-0	1.44213	22℃
ZAT10	Col-0	1.60983	22℃
ZAT10	Col-0	13.6746	28℃
ZAT10	Col-0	21.5684	28℃
ZAT10	Col-0	20.4523	28℃
ZAT10	kcs1/2/20	6.10466	22℃
ZAT10	kcs1/2/20	4.01529	22℃
ZAT10	kcs1/2/20	4.8281	22℃
ZAT10	kcs1/2/20	4.83967	28℃
ZAT10	kcs1/2/20	6.82398	28℃
ZAT10	kcs1/2/20	4.80222	28℃
ZAT10	kcs1/2/20 Cmix	4.20583	22℃
ZAT10	kcs1/2/20 Cmix	5.15761	22℃
ZAT10	kcs1/2/20 Cmix	6.9726	22℃
ZAT10	kcs1/2/20 Cmix	8.39088	28℃
ZAT10	kcs1/2/20 Cmix	9.352	28℃
ZAT10	kcs1/2/20 Cmix	10.6537	28℃
One-way ANOVA
Comparison	Df	F value	p-value
Genotype	5	26.72	4.12 E-06
Residuals	12
Tukey's multiple comparisons test
Comparison	adjusted p-value
Col-0 28℃ vs Col-0 22℃	2.44455e-06
kcs1220 Cmix C20-C30 10day 22℃ vs Col-0 22℃	0.201359
kcs1220 Cmix C20-C30 10day 28℃ vs Col-0 22℃	0.00350574
kcs1220 22℃ vs Col-0 22℃	0.301828
kcs1220 28℃ vs Col-0 22℃	0.193543
kcs1220 Cmix C20-C30 10day 22℃ vs Col-0 28℃	4.17336e-05
kcs1220 Cmix C20-C30 10day 28℃ vs Col-0 28℃	0.00131659
kcs1220 22℃ vs Col-0 28℃	2.93268e-05
kcs1220 28℃ vs Col-0 28℃	4.31527e-05
kcs1220 Cmix C20-C30 10day 28℃ vs kcs1220 Cmix C20-C30 10day 22℃	0.210641
kcs1220 22℃ vs kcs1220 Cmix C20-C30 10day 22℃	0.999683
kcs1220 28℃ vs kcs1220 Cmix C20-C30 10day 22℃	1
kcs1220 22℃ vs kcs1220 Cmix C20-C30 10day 28℃	0.136675
kcs1220 28℃ vs kcs1220 Cmix C20-C30 10day 28℃	0.21902
kcs1220 28℃ vs kcs1220 22℃	0.99951

## Sheet: Fig. 3
Fig. 3b Primary Root Length					Fig. 3c Cell Number of Meristematic zone				Fig. 3d Length of Meristematic zone				Fig. 3e Cell Number of Elongation zone				Fig. 3f Length of Elongation zone				Fig. 3g Cortex cell length in the Maturation zone
Rootlength	kind	temperature			Genotype	temperature	MeZ Cell Number		Genotype	temperature	MeZ Length		Genotype	temperature	EZ Cell Number		Genotype	temperature	EZ length		Genotype	temperature	MaZ Cell length
4.853	Col-0	22			Col-0	22	31		Col-0	22	190.13		Col-0	22	19		Col-0	22	494.366		Col-0	22	216.567
5.685	Col-0	22			Col-0	22	31		Col-0	22	215.977		Col-0	22	11		Col-0	22	431.081		Col-0	22	190.811
5.234	Col-0	22			Col-0	22	27		Col-0	22	174.267		Col-0	22	14		Col-0	22	498.155		Col-0	22	171.381
4.332	Col-0	22			Col-0	22	27		Col-0	22	240.204		Col-0	22	16		Col-0	22	397.845		Col-0	22	161.634
5.689	Col-0	22			Col-0	22	22		Col-0	22	156.763		Col-0	22	19		Col-0	22	521.33		Col-0	22	249.022
5.028	Col-0	22			Col-0	22	30		Col-0	22	176.044		Col-0	22	11		Col-0	22	507.655		Col-0	22	183.784
3.896	Col-0	22			Col-0	22	35		Col-0	22	247.338		Col-0	22	10		Col-0	22	415.889		Col-0	22	169.895
5.172	Col-0	22			Col-0	22	33		Col-0	22	273.75		Col-0	22	12		Col-0	22	530.8		Col-0	22	190.43
4.951	Col-0	22			Col-0	22	33		Col-0	22	244.525		Col-0	22	15		Col-0	22	538.677		Col-0	22	170.027
5.187	Col-0	22			Col-0	22	25		Col-0	22	208.933		Col-0	22	18		Col-0	22	610.342		Col-0	22	188.735
5.026	Col-0	22			Col-0	22	29		Col-0	22	217.982		Col-0	22	19		Col-0	22	771.922		Col-0	22	179.704
4.632	Col-0	22			Col-0	22	30		Col-0	22	204.827		Col-0	28	13		Col-0	28	506.367		Col-0	22	182.593
4.513	Col-0	22			Col-0	22	32		Col-0	22	191.179		Col-0	28	13		Col-0	28	729.731		Col-0	22	198.078
4.634	Col-0	22			Col-0	28	23		Col-0	28	188.594		Col-0	28	16		Col-0	28	439.469		Col-0	22	169.209
4.76	Col-0	22			Col-0	28	21		Col-0	28	169.199		Col-0	28	18		Col-0	28	635.72		Col-0	22	168.816
4.848	Col-0	22			Col-0	28	39		Col-0	28	266.973		Col-0	28	12		Col-0	28	637.11		Col-0	22	175.171
5.054	Col-0	22			Col-0	28	34		Col-0	28	232.255		Col-0	28	19		Col-0	28	526.194		Col-0	22	138.786
5.173	Col-0	22			Col-0	28	40		Col-0	28	298.915		Col-0	28	11		Col-0	28	488.036		Col-0	22	234.3
3.549	Col-0	22			Col-0	28	37		Col-0	28	304.012		kcs1/2/20	22	12		Col-0	28	458.879		Col-0	22	215.274
4.248	Col-0	22			Col-0	28	30		Col-0	28	245.613		kcs1/2/20	22	15		kcs1/2/20	22	417.691		Col-0	22	228.864
5.231	Col-0	22			Col-0	28	26		Col-0	28	220.931		kcs1/2/20	22	14		kcs1/2/20	22	414.444		Col-0	22	218.832
4.884	Col-0	22			Col-0	28	31		Col-0	28	224.421		kcs1/2/20	22	14		kcs1/2/20	22	467.676		Col-0	22	215.536
4.962	Col-0	22			Col-0	28	33		Col-0	28	230.466		kcs1/2/20	22	19		kcs1/2/20	22	347.091		Col-0	22	202.942
4.92	Col-0	22			Col-0	28	35		Col-0	28	210.029		kcs1/2/20	22	16		kcs1/2/20	22	706.52		Col-0	22	179.245
6.331	Col-0	28			Col-0	28	26		Col-0	28	193.585		kcs1/2/20	22	11		kcs1/2/20	22	387.113		Col-0	22	168.847
6.462	Col-0	28			Col-0	28	33		Col-0	28	230.12		kcs1/2/20	22	6		kcs1/2/20	22	346.501		Col-0	22	243.457
7.723	Col-0	28			Col-0	28	33		Col-0	28	260.569		kcs1/2/20	22	16		kcs1/2/20	22	338.961		Col-0	22	189.042
6.812	Col-0	28			Col-0	28	28		Col-0	28	185.254		kcs1/2/20	22	16		kcs1/2/20	22	487.3		Col-0	22	212.473
6.606	Col-0	28			Col-0	28	28		Col-0	28	211.453		kcs1/2/20	22	10		kcs1/2/20	22	483.994		Col-0	22	247.251
6.61	Col-0	28			Col-0	28	28		Col-0	28	194.053		kcs1/2/20	22	16		kcs1/2/20	22	391.072		Col-0	22	195.852
6.875	Col-0	28			Col-0	28	23		Col-0	28	160.394		kcs1/2/20	22	11		kcs1/2/20	22	514.751		Col-0	22	165.16
6.664	Col-0	28			Col-0	28	33		Col-0	28	269.846		kcs1/2/20	22	19		kcs1/2/20	22	550.059		Col-0	22	214.971
6.87	Col-0	28			Col-0	28	23		Col-0	28	184.479		kcs1/2/20	22	21		kcs1/2/20	22	706.804		Col-0	22	181.098
6.967	Col-0	28			Col-0	28	25		Col-0	28	188.522		kcs1/2/20	28	12		kcs1/2/20	22	644.509		Col-0	22	152.614
6.59	Col-0	28			Col-0	28	31		Col-0	28	219.256		kcs1/2/20	28	15		kcs1/2/20	28	575.862		Col-0	22	161.272
7.25	Col-0	28			kcs1/2/20	22	27		kcd1/2/20	22	225.051		kcs1/2/20	28	14		kcs1/2/20	28	681.254		Col-0	22	173.518
6.003	Col-0	28			kcs1/2/20	22	27		kcd1/2/20	22	216.901		kcs1/2/20	28	10		kcs1/2/20	28	523.807		Col-0	22	160.331
5.419	Col-0	28			kcs1/2/20	22	26		kcd1/2/20	22	185.69		kcs1/2/20	28	9		kcs1/2/20	28	316.365		Col-0	22	175.828
5.683	Col-0	28			kcs1/2/20	22	25		kcd1/2/20	22	179.721		kcs1/2/20	28	14		kcs1/2/20	28	348.554		Col-0	22	135.66
6.189	Col-0	28			kcs1/2/20	22	34		kcd1/2/20	22	251.68		kcs1/2/20	28	13		kcs1/2/20	28	713.829		Col-0	22	225.927
6.168	Col-0	28			kcs1/2/20	22	31		kcd1/2/20	22	206.454		kcs1/2/20	28	13		kcs1/2/20	28	637.957		Col-0	22	202.654
7.049	Col-0	28			kcs1/2/20	22	24		kcd1/2/20	22	164.121		kcs1/2/20	28	7		kcs1/2/20	28	531.665		Col-0	22	213.326
6.282	Col-0	28			kcs1/2/20	22	28		kcd1/2/20	22	244.733		zat10	22	8		kcs1/2/20	28	236.714		Col-0	22	190.09
6.078	Col-0	28			kcs1/2/20	22	33		kcd1/2/20	22	208.538		zat10	22	10		zat10	22	371.532		Col-0	22	187.56
4.826	zat10	22			kcs1/2/20	22	27		kcd1/2/20	22	210.023		zat10	22	12		zat10	22	409.46		Col-0	22	193.531
3.74	zat10	22			kcs1/2/20	22	23		kcd1/2/20	22	172.621		zat10	22	16		zat10	22	386.148		Col-0	22	172.238
3.508	zat10	22			kcs1/2/20	22	30		kcd1/2/20	22	224.652		zat10	22	15		zat10	22	413.551		Col-0	22	248.888
3.516	zat10	22			kcs1/2/20	22	22		kcd1/2/20	22	171.665		zat10	22	20		zat10	22	488.377		Col-0	22	233.795
4.518	zat10	22			kcs1/2/20	22	26		kcd1/2/20	22	212.943		zat10	22	16		zat10	22	404.933		Col-0	22	195.048
4.51	zat10	22			kcs1/2/20	22	23		kcd1/2/20	22	209.432		zat10	22	18		zat10	22	771.5		Col-0	22	198.644
4.666	zat10	22			kcs1/2/20	22	33		kcd1/2/20	22	214.907		zat10	22	18		zat10	22	391.918		Col-0	22	188.364
1.948	zat10	22			kcs1/2/20	22	36		kcd1/2/20	22	290.822		zat10	22	8		zat10	22	810.139		Col-0	22	196.528
4.36	zat10	22			kcs1/2/20	22	31		kcd1/2/20	22	204.573		zat10	22	18		zat10	22	735.704		Col-0	22	179.28
4.506	zat10	22			kcs1/2/20	22	36		kcd1/2/20	22	285.903		zat10	22	12		zat10	22	364.298		Col-0	22	179.667
4.523	zat10	22			kcs1/2/20	22	26		kcd1/2/20	22	175.162		zat10	22	13		zat10	22	635.184		Col-0	22	170.941
4.844	zat10	22			kcs1/2/20	28	31		kcd1/2/20	28	248.793		zat10	22	13		zat10	22	398.775		Col-0	22	155.895
4.718	zat10	22			kcs1/2/20	28	33		kcd1/2/20	28	233.347		zat10	22	13		zat10	22	467.755		Col-0	22	229.825
3.635	zat10	22			kcs1/2/20	28	24		kcd1/2/20	28	205.485		zat10	22	12		zat10	22	591.14		Col-0	22	276.115
4.916	zat10	22			kcs1/2/20	28	24		kcd1/2/20	28	219.734		zat10	22	13		zat10	22	692.299		Col-0	22	168.057
5.065	zat10	22			kcs1/2/20	28	27		kcd1/2/20	28	206.345		zat10	22	16		zat10	22	562.703		Col-0	22	220.422
5.016	zat10	22			kcs1/2/20	28	41		kcd1/2/20	28	315.204		zat10	22	16		zat10	22	456.506		Col-0	22	209.052
5.455	zat10	22			kcs1/2/20	28	35		kcd1/2/20	28	272.376		zat10	22	11		zat10	22	602.691		Col-0	22	190.74
5.019	zat10	22			kcs1/2/20	28	32		kcd1/2/20	28	238.104		zat10	28	19		zat10	22	607.259		Col-0	22	195.558
4.249	zat10	22			kcs1/2/20	28	22		kcd1/2/20	28	202.223		zat10	28	17		zat10	22	470.763		Col-0	22	225.128
5.034	zat10	22			kcs1/2/20	28	34		kcd1/2/20	28	239.889		zat10	28	17		zat10	28	692.824		Col-0	22	186.524
5.457	zat10	22			kcs1/2/20	28	21		kcd1/2/20	28	196.572		zat10	28	12		zat10	28	539.631		Col-0	22	178.123
5.059	zat10	22			kcs1/2/20	28	35		kcd1/2/20	28	290.733		zat10	28	14		zat10	28	566.159		Col-0	22	235.357
5.586	zat10	22			kcs1/2/20	28	32		kcd1/2/20	28	235.306		zat10	28	16		zat10	28	475.591		Col-0	22	185.325
4.627	zat10	22			kcs1/2/20	28	31		kcd1/2/20	28	217.202		zat10	28	11		zat10	28	527.162		Col-0	22	253.502
4.429	zat10	22			kcs1/2/20	28	29		kcd1/2/20	28	207.784		zat10	28	13		zat10	28	701.24		Col-0	22	174.738
3.935	zat10	22			kcs1/2/20	28	22		kcd1/2/20	28	160.069		zat10	28	8		zat10	28	582.059		Col-0	22	175.859
4.868	zat10	22			zat10	22	20		zat10	22	178.346		zat10	28	9		zat10	28	543.748		Col-0	22	207.043
4.764	zat10	22			zat10	22	26		zat10	22	182.325		ZAT10/zat10 #1	22	15		zat10	28	521.951		Col-0	22	157.051
4.537	zat10	22			zat10	22	23		zat10	22	175.602		ZAT10/zat10 #1	22	13		zat10	28	561.101		Col-0	22	205.408
4.904	zat10	22			zat10	22	21		zat10	22	166.991		ZAT10/zat10 #1	22	17		ZAT10/zat10 #1	22	429.766		Col-0	22	213.819
5.786	zat10	28			zat10	22	22		zat10	22	165.567		ZAT10/zat10 #1	22	11		ZAT10/zat10 #1	22	496.594		Col-0	22	207.057
5.92	zat10	28			zat10	22	36		zat10	22	220.581		ZAT10/zat10 #1	22	13		ZAT10/zat10 #1	22	455.893		Col-0	22	230.873
5.82	zat10	28			zat10	22	24		zat10	22	169.285		ZAT10/zat10 #1	22	13		ZAT10/zat10 #1	22	326.231		Col-0	22	199.596
6.487	zat10	28			zat10	22	31		zat10	22	213.443		ZAT10/zat10 #1	22	11		ZAT10/zat10 #1	22	365.514		Col-0	22	204.226
4.386	zat10	28			zat10	22	32		zat10	22	214.442		ZAT10/zat10 #1	22	13		ZAT10/zat10 #1	22	434.007		Col-0	22	191.788
5.623	zat10	28			zat10	22	29		zat10	22	225.372		ZAT10/zat10 #1	22	11		ZAT10/zat10 #1	22	535.517		Col-0	22	182.654
7.586	zat10	28			zat10	22	28		zat10	22	183.378		ZAT10/zat10 #1	22	12		ZAT10/zat10 #1	22	581.49		Col-0	22	188.429
5.521	zat10	28			zat10	22	24		zat10	22	202.308		ZAT10/zat10 #1	22	12		ZAT10/zat10 #1	22	590.681		Col-0	22	245.656
5.694	zat10	28			zat10	22	27		zat10	22	211.399		ZAT10/zat10 #1	22	11		ZAT10/zat10 #1	22	437.394		Col-0	22	178.688
5.66	zat10	28			zat10	22	29		zat10	22	208.345		ZAT10/zat10 #1	22	12		ZAT10/zat10 #1	22	525.506		Col-0	22	183.527
5.829	zat10	28			zat10	22	36		zat10	22	258.884		ZAT10/zat10 #1	22	13		ZAT10/zat10 #1	22	390.299		Col-0	28	227.348
1.61	zat10	28			zat10	22	42		zat10	22	280.665		ZAT10/zat10 #1	22	13		ZAT10/zat10 #1	22	357.953		Col-0	28	215.062
3.351	zat10	28			zat10	22	27		zat10	22	220.706		ZAT10/zat10 #1	22	13		ZAT10/zat10 #1	22	320.48		Col-0	28	240.411
5.212	zat10	28			zat10	22	30		zat10	22	239.86		ZAT10/zat10 #1	28	13		ZAT10/zat10 #1	22	424.3		Col-0	28	237.884
3.147	zat10	28			zat10	22	34		zat10	22	266.696		ZAT10/zat10 #1	28	11		ZAT10/zat10 #1	22	460.874		Col-0	28	219.399
5.925	zat10	28			zat10	22	35		zat10	22	239.847		ZAT10/zat10 #1	28	14		ZAT10/zat10 #1	28	343.592		Col-0	28	260.924
4.462	zat10	28			zat10	22	29		zat10	22	194.113		ZAT10/zat10 #1	28	11		ZAT10/zat10 #1	28	411.895		Col-0	28	256.369
5.527	zat10	28			zat10	22	37		zat10	22	249.221		ZAT10/zat10 #1	28	8		ZAT10/zat10 #1	28	339.342		Col-0	28	174.606
4.338	zat10	28			zat10	22	38		zat10	22	238.158		ZAT10/zat10 #1	28	13		ZAT10/zat10 #1	28	330.004		Col-0	28	259.537
4.279	zat10	28			zat10	22	42		zat10	22	287.072		ZAT10/zat10 #1	28	13		ZAT10/zat10 #1	28	410.972		Col-0	28	207.355
5.012	zat10	28			zat10	28	38		zat10	28	303.658		ZAT10/zat10 #1	28	12		ZAT10/zat10 #1	28	414.636		Col-0	28	214.534
3.053	zat10	28			zat10	28	29		zat10	28	229.567		ZAT10/zat10 #1	28	11		ZAT10/zat10 #1	28	350.279		Col-0	28	255.916
3.493	zat10	28			zat10	28	32		zat10	28	235.228		ZAT10/zat10 #1	28	12		ZAT10/zat10 #1	28	465.939		Col-0	28	272.334
3.483	zat10	28			zat10	28	26		zat10	28	198.141		ZAT10/zat10 #1	28	17		ZAT10/zat10 #1	28	579.535		Col-0	28	189.417
3.252	zat10	28			zat10	28	23		zat10	28	158.213		ZAT10/zat10 #1	28	13		ZAT10/zat10 #1	28	438.422		Col-0	28	257.226
4.43	zat10	28			zat10	28	21		zat10	28	166.394		ZAT10/zat10 #2	22	12		ZAT10/zat10 #1	28	523.819		Col-0	28	206.723
5.194	pZAT10::cZAT10-YFP/zat10 #1	22			zat10	28	29		zat10	28	234.103		ZAT10/zat10 #2	22	15		ZAT10/zat10 #1	28	559.858		Col-0	28	260.96
4.69	pZAT10::cZAT10-YFP/zat10 #1	22			zat10	28	36		zat10	28	264.457		ZAT10/zat10 #2	22	15		ZAT10/zat10 #2	22	564.018		Col-0	28	213.436
5.359	pZAT10::cZAT10-YFP/zat10 #1	22			zat10	28	29		zat10	28	230.349		ZAT10/zat10 #2	22	16		ZAT10/zat10 #2	22	535.439		Col-0	28	288.473
4.901	pZAT10::cZAT10-YFP/zat10 #1	22			zat10	28	29		zat10	28	216.208		ZAT10/zat10 #2	22	14		ZAT10/zat10 #2	22	507.514		Col-0	28	177.552
5.086	pZAT10::cZAT10-YFP/zat10 #1	22			zat10	28	26		zat10	28	189.299		ZAT10/zat10 #2	22	17		ZAT10/zat10 #2	22	488.024		Col-0	28	227.8
5.094	pZAT10::cZAT10-YFP/zat10 #1	22			zat10	28	34		zat10	28	274.192		ZAT10/zat10 #2	22	14		ZAT10/zat10 #2	22	391.263		Col-0	28	272.39
5.075	pZAT10::cZAT10-YFP/zat10 #1	22			zat10	28	27		zat10	28	208.213		ZAT10/zat10 #2	22	13		ZAT10/zat10 #2	22	532.953		Col-0	28	276.532
4.788	pZAT10::cZAT10-YFP/zat10 #1	22			zat10	28	29		zat10	28	204.164		ZAT10/zat10 #2	22	14		ZAT10/zat10 #2	22	459.76		Col-0	28	278.71
5.461	pZAT10::cZAT10-YFP/zat10 #1	22			zat10	28	26		zat10	28	219.662		ZAT10/zat10 #2	22	13		ZAT10/zat10 #2	22	412.834		Col-0	28	230.692
4.68	pZAT10::cZAT10-YFP/zat10 #1	22			zat10	28	33		zat10	28	280.064		ZAT10/zat10 #2	28	14		ZAT10/zat10 #2	22	457.208		Col-0	28	201.796
4.639	pZAT10::cZAT10-YFP/zat10 #1	22			zat10	28	32		zat10	28	282.586		ZAT10/zat10 #2	28	16		ZAT10/zat10 #2	22	590.577		Col-0	28	204.404
4.356	pZAT10::cZAT10-YFP/zat10 #1	22			ZAT10/zat10 #1	22	29		ZAT10/zat10 #1	22	213.994		ZAT10/zat10 #2	28	14		ZAT10/zat10 #2	28	576.45		Col-0	28	262.151
3.772	pZAT10::cZAT10-YFP/zat10 #1	22			ZAT10/zat10 #1	22	27		ZAT10/zat10 #1	22	220.267		ZAT10/zat10 #2	28	15		ZAT10/zat10 #2	28	463.045		Col-0	28	272.39
4.028	pZAT10::cZAT10-YFP/zat10 #1	22			ZAT10/zat10 #1	22	29		ZAT10/zat10 #1	22	188.783		ZAT10/zat10 #2	28	11		ZAT10/zat10 #2	28	407.184		Col-0	28	257.927
4.153	pZAT10::cZAT10-YFP/zat10 #1	22			ZAT10/zat10 #1	22	29		ZAT10/zat10 #1	22	209.604		ZAT10/zat10 #2	28	15		ZAT10/zat10 #2	28	448.838		Col-0	28	221.453
4.918	pZAT10::cZAT10-YFP/zat10 #1	22			ZAT10/zat10 #1	22	28		ZAT10/zat10 #1	22	197.817		ZAT10/zat10 #2	28	11		ZAT10/zat10 #2	28	510.266		Col-0	28	238.232
4.931	pZAT10::cZAT10-YFP/zat10 #1	22			ZAT10/zat10 #1	22	28		ZAT10/zat10 #1	22	221.866		ZAT10/zat10 #2	28	12		ZAT10/zat10 #2	28	412.067		Col-0	28	282.829
4.355	pZAT10::cZAT10-YFP/zat10 #1	22			ZAT10/zat10 #1	22	28		ZAT10/zat10 #1	22	224.327		ZAT10/zat10 #2	28	11		ZAT10/zat10 #2	28	564.665		Col-0	28	235.142
3.18	pZAT10::cZAT10-YFP/zat10 #1	22			ZAT10/zat10 #1	22	29		ZAT10/zat10 #1	22	229.611		ZAT10/zat10 #2	28	13		ZAT10/zat10 #2	28	567.358		Col-0	28	303.629
4.501	pZAT10::cZAT10-YFP/zat10 #1	22			ZAT10/zat10 #1	22	30		ZAT10/zat10 #1	22	215.582		ZAT10/zat10 #2	28	14		ZAT10/zat10 #2	28	534.898		Col-0	28	206.567
3.813	pZAT10::cZAT10-YFP/zat10 #1	22			ZAT10/zat10 #1	22	26		ZAT10/zat10 #1	22	221.859		ZAT10/zat10 #2	28	13		ZAT10/zat10 #2	28	547		Col-0	28	242.062
3.988	pZAT10::cZAT10-YFP/zat10 #1	22			ZAT10/zat10 #1	22	27		ZAT10/zat10 #1	22	220.755						ZAT10/zat10 #2	28	395.769		Col-0	28	239.2
3.78	pZAT10::cZAT10-YFP/zat10 #1	22			ZAT10/zat10 #1	22	27		ZAT10/zat10 #1	22	210.138						ZAT10/zat10 #2	28	649.228		Col-0	28	244.175
3.722	pZAT10::cZAT10-YFP/zat10 #1	22			ZAT10/zat10 #1	22	28		ZAT10/zat10 #1	22	223.298										Col-0	28	188.472
3.579	pZAT10::cZAT10-YFP/zat10 #1	22			ZAT10/zat10 #1	22	30		ZAT10/zat10 #1	22	265.134										Col-0	28	210.027
4.048	pZAT10::cZAT10-YFP/zat10 #1	22			ZAT10/zat10 #1	28	21		ZAT10/zat10 #1	28	199.977										Col-0	28	180.498
4.264	pZAT10::cZAT10-YFP/zat10 #1	22			ZAT10/zat10 #1	28	26		ZAT10/zat10 #1	28	195.376										Col-0	28	228.682
4.207	pZAT10::cZAT10-YFP/zat10 #1	22			ZAT10/zat10 #1	28	28		ZAT10/zat10 #1	28	233.153										Col-0	28	268.436
7.244	pZAT10::cZAT10-YFP/zat10 #1	28			ZAT10/zat10 #1	28	30		ZAT10/zat10 #1	28	235.024										Col-0	28	281.817
6.874	pZAT10::cZAT10-YFP/zat10 #1	28			ZAT10/zat10 #1	28	35		ZAT10/zat10 #1	28	274.614										Col-0	28	274.53
6.954	pZAT10::cZAT10-YFP/zat10 #1	28			ZAT10/zat10 #1	28	32		ZAT10/zat10 #1	28	230.764										Col-0	28	258.646
6.12	pZAT10::cZAT10-YFP/zat10 #1	28			ZAT10/zat10 #1	28	28		ZAT10/zat10 #1	28	215.508										Col-0	28	229.077
6.82	pZAT10::cZAT10-YFP/zat10 #1	28			ZAT10/zat10 #1	28	32		ZAT10/zat10 #1	28	257.507										Col-0	28	271.368
5.235	pZAT10::cZAT10-YFP/zat10 #1	28			ZAT10/zat10 #1	28	28		ZAT10/zat10 #1	28	256.338										Col-0	28	200.982
5.683	pZAT10::cZAT10-YFP/zat10 #1	28			ZAT10/zat10 #1	28	27		ZAT10/zat10 #1	28	251.26										Col-0	28	236.799
5.324	pZAT10::cZAT10-YFP/zat10 #1	28			ZAT10/zat10 #1	28	26		ZAT10/zat10 #1	28	247.091										Col-0	28	282.95
5.56	pZAT10::cZAT10-YFP/zat10 #1	28			ZAT10/zat10 #1	28	29		ZAT10/zat10 #1	28	256.852										Col-0	28	241.299
4.425	pZAT10::cZAT10-YFP/zat10 #1	28			ZAT10/zat10 #1	28	26		ZAT10/zat10 #1	28	195.333										Col-0	28	245.245
4.686	pZAT10::cZAT10-YFP/zat10 #1	28			ZAT10/zat10 #1	28	25		ZAT10/zat10 #1	28	188.16										Col-0	28	198.132
4.379	pZAT10::cZAT10-YFP/zat10 #1	28			ZAT10/zat10 #1	28	24		ZAT10/zat10 #1	28	212.042										Col-0	28	267.827
5.751	pZAT10::cZAT10-YFP/zat10 #1	28			ZAT10/zat10 #1	28	31		ZAT10/zat10 #1	28	280.423										Col-0	28	238.363
5.061	pZAT10::cZAT10-YFP/zat10 #1	28			ZAT10/zat10 #2	22	29		ZAT10/zat10 #2	22	233										Col-0	28	193.483
5.787	pZAT10::cZAT10-YFP/zat10 #1	28			ZAT10/zat10 #2	22	24		ZAT10/zat10 #2	22	270.942										Col-0	28	195.842
5.497	pZAT10::cZAT10-YFP/zat10 #1	28			ZAT10/zat10 #2	22	33		ZAT10/zat10 #2	22	267.619										Col-0	28	235.865
4.398	pZAT10::cZAT10-YFP/zat10 #1	28			ZAT10/zat10 #2	22	24		ZAT10/zat10 #2	22	231.456										Col-0	28	219.714
5.527	pZAT10::cZAT10-YFP/zat10 #1	28			ZAT10/zat10 #2	22	30		ZAT10/zat10 #2	22	246.837										Col-0	28	213.883
5.209	pZAT10::cZAT10-YFP/zat10 #1	28			ZAT10/zat10 #2	22	28		ZAT10/zat10 #2	22	227.45										Col-0	28	234.193
5.589	pZAT10::cZAT10-YFP/zat10 #1	28			ZAT10/zat10 #2	22	31		ZAT10/zat10 #2	22	247.713										Col-0	28	273.944
5.387	pZAT10::cZAT10-YFP/zat10 #2	22			ZAT10/zat10 #2	22	29		ZAT10/zat10 #2	22	262.904										Col-0	28	151.424
5.207	pZAT10::cZAT10-YFP/zat10 #2	22			ZAT10/zat10 #2	22	26		ZAT10/zat10 #2	22	279.025										Col-0	28	237.224
2.073	pZAT10::cZAT10-YFP/zat10 #2	22			ZAT10/zat10 #2	22	31		ZAT10/zat10 #2	22	246.282										Col-0	28	219.174
4.969	pZAT10::cZAT10-YFP/zat10 #2	22			ZAT10/zat10 #2	22	29		ZAT10/zat10 #2	22	251.018										Col-0	28	180.736
5.013	pZAT10::cZAT10-YFP/zat10 #2	22			ZAT10/zat10 #2	22	32		ZAT10/zat10 #2	22	262.743										Col-0	28	190.901
5.035	pZAT10::cZAT10-YFP/zat10 #2	22			ZAT10/zat10 #2	22	26		ZAT10/zat10 #2	22	213.832										Col-0	28	233.656
5.651	pZAT10::cZAT10-YFP/zat10 #2	22			ZAT10/zat10 #2	22	29		ZAT10/zat10 #2	22	200.947										Col-0	28	219.895
5.185	pZAT10::cZAT10-YFP/zat10 #2	22			ZAT10/zat10 #2	22	33		ZAT10/zat10 #2	22	220.129										Col-0	28	220.505
4.848	pZAT10::cZAT10-YFP/zat10 #2	22			ZAT10/zat10 #2	22	33		ZAT10/zat10 #2	22	214.847										Col-0	28	258.022
5.148	pZAT10::cZAT10-YFP/zat10 #2	22			ZAT10/zat10 #2	28	33		ZAT10/zat10 #2	22	233.879										Col-0	28	257.551
2.732	pZAT10::cZAT10-YFP/zat10 #2	22			ZAT10/zat10 #2	28	23		ZAT10/zat10 #2	22	239.174										Col-0	28	250.487
4.206	pZAT10::cZAT10-YFP/zat10 #2	22			ZAT10/zat10 #2	28	31		ZAT10/zat10 #2	28	236.671										Col-0	28	232.851
5.457	pZAT10::cZAT10-YFP/zat10 #2	28			ZAT10/zat10 #2	28	27		ZAT10/zat10 #2	28	250.568										Col-0	28	238.277
6.04	pZAT10::cZAT10-YFP/zat10 #2	28			ZAT10/zat10 #2	28	30		ZAT10/zat10 #2	28	231.21										Col-0	28	201.789
5.315	pZAT10::cZAT10-YFP/zat10 #2	28			ZAT10/zat10 #2	28	30		ZAT10/zat10 #2	28	194.826										Col-0	28	252.3
3.881	pZAT10::cZAT10-YFP/zat10 #2	28			ZAT10/zat10 #2	28	30		ZAT10/zat10 #2	28	227.429										Col-0	28	279.265
5.85	pZAT10::cZAT10-YFP/zat10 #2	28			ZAT10/zat10 #2	28	26		ZAT10/zat10 #2	28	246.671										Col-0	28	285.184
5.608	pZAT10::cZAT10-YFP/zat10 #2	28			ZAT10/zat10 #2	28	29		ZAT10/zat10 #2	28	302.312										Col-0	28	268.356
4.741	pZAT10::cZAT10-YFP/zat10 #2	28			ZAT10/zat10 #2	28	25		ZAT10/zat10 #2	28	276.56										Col-0	28	174.418
5.634	pZAT10::cZAT10-YFP/zat10 #2	28			ZAT10/zat10 #2	28	32		ZAT10/zat10 #2	28	253.167										Col-0	28	182.012
5.544	pZAT10::cZAT10-YFP/zat10 #2	28			ZAT10/zat10 #2	28	33		ZAT10/zat10 #2	28	214.248										Col-0	28	235.59
5.599	pZAT10::cZAT10-YFP/zat10 #2	28			ZAT10/zat10 #2	28	34		ZAT10/zat10 #2	28	229.023										Col-0	28	251.853
5.613	pZAT10::cZAT10-YFP/zat10 #2	28			ZAT10/zat10 #2	28	31		ZAT10/zat10 #2	28	241.642										Col-0	28	186.896
					ZAT10/zat10 #2	28	28		ZAT10/zat10 #2	28	304.184										Col-0	28	235.466
					ZAT10/zat10 #2	28	28		ZAT10/zat10 #2	28	272.908										Col-0	28	178.374
One-way ANOVA					ZAT10/zat10 #2	28	28		ZAT10/zat10 #2	28	264.69										Col-0	28	231.597
Comparison	Df	F value	p-value		ZAT10/zat10 #2	28	30		ZAT10/zat10 #2	28	193.584										kcs1/2/20	22	253.852
Genotype	7	21.87	< 2 E-16						ZAT10/zat10 #2	28	200.58										kcs1/2/20	22	158.591
Residuals	187								ZAT10/zat10 #2	28	231.925										kcs1/2/20	22	238.736
																					kcs1/2/20	22	190.915
	Tukey's multiple comparisons test																				kcs1/2/20	22	158.703
	Comparison	p-value																			kcs1/2/20	22	228.898
	Col-0 28℃ vs Col-0 22℃	1.62812e-10																			kcs1/2/20	22	149.978
	pZAT10::cZAT10-YFP/zat10 #1 22℃ vs Col-0 22℃	0.999909																			kcs1/2/20	22	215.14
	pZAT10::cZAT10-YFP/zat10 #1 28℃ vs Col-0 22℃	0.00544897																			kcs1/2/20	22	151.65
	pZAT10::cZAT10-YFP/zat10 #2 22℃ vs Col-0 22℃	0.989143																			kcs1/2/20	22	181.699
	pZAT10::cZAT10-YFP/zat10 #2 28℃ vs Col-0 22℃	8.37689e-11																			kcs1/2/20	22	143.296
	zat10 22℃ vs Col-0 22℃	1																			kcs1/2/20	22	191.533
	zat10 28℃ vs Col-0 22℃	0.979859																			kcs1/2/20	22	113.89
	pZAT10::cZAT10-YFP/zat10 #1 22℃ vs Col-0 28℃	5.41434e-12																			kcs1/2/20	22	227.208
	pZAT10::cZAT10-YFP/zat10 #1 28℃ vs Col-0 28℃	0.0210339																			kcs1/2/20	22	224.952
	pZAT10::cZAT10-YFP/zat10 #2 22℃ vs Col-0 28℃	5.41937e-08																			kcs1/2/20	22	188.728
	pZAT10::cZAT10-YFP/zat10 #2 28℃ vs Col-0 28℃	1																			kcs1/2/20	22	199.149
	zat10 22℃ vs Col-0 28℃	1.55069e-11																			kcs1/2/20	22	235.426
	zat10 28℃ vs Col-0 28℃	1.89701e-08																			kcs1/2/20	22	157.163
	pZAT10::cZAT10-YFP/zat10 #1 28℃ vs pZAT10::cZAT10-YFP/zat10 #1 22℃	0.000909986																			kcs1/2/20	22	171.703
	pZAT10::cZAT10-YFP/zat10 #2 22℃ vs pZAT10::cZAT10-YFP/zat10 #1 22℃	0.906321																			kcs1/2/20	22	178.9
	pZAT10::cZAT10-YFP/zat10 #2 28℃ vs pZAT10::cZAT10-YFP/zat10 #1 22℃	2.53442e-12																			kcs1/2/20	22	189.319
	zat10 22℃ vs pZAT10::cZAT10-YFP/zat10 #1 22℃	0.999949																			kcs1/2/20	22	177.823
	zat10 28℃ vs pZAT10::cZAT10-YFP/zat10 #1 22℃	0.858159																			kcs1/2/20	22	204.292
	pZAT10::cZAT10-YFP/zat10 #2 22℃ vs pZAT10::cZAT10-YFP/zat10 #1 28℃	0.0917914																			kcs1/2/20	22	148.106
	pZAT10::cZAT10-YFP/zat10 #2 28℃ vs pZAT10::cZAT10-YFP/zat10 #1 28℃	0.0174974																			kcs1/2/20	22	254.608
	zat10 22℃ vs pZAT10::cZAT10-YFP/zat10 #1 28℃	0.00241083																			kcs1/2/20	22	195.814
	zat10 28℃ vs pZAT10::cZAT10-YFP/zat10 #1 28℃	0.0796854																			kcs1/2/20	22	174.183
	pZAT10::cZAT10-YFP/zat10 #2 28℃ vs pZAT10::cZAT10-YFP/zat10 #2 22℃	3.25206e-08																			kcs1/2/20	22	172.384
	zat10 22℃ vs pZAT10::cZAT10-YFP/zat10 #2 22℃	0.980066																			kcs1/2/20	22	162.764
	zat10 28℃ vs pZAT10::cZAT10-YFP/zat10 #2 22℃	1																			kcs1/2/20	22	196.824
	zat10 22℃ vs pZAT10::cZAT10-YFP/zat10 #2 28℃	7.15494e-12																			kcs1/2/20	22	249.256
	zat10 28℃ vs pZAT10::cZAT10-YFP/zat10 #2 28℃	1.07035e-08																			kcs1/2/20	22	198.896
	zat10 28℃ vs zat10 22℃	0.963773																			kcs1/2/20	22	154.103
																					kcs1/2/20	22	177.475
																					kcs1/2/20	22	209.678
																					kcs1/2/20	22	195.371
																					kcs1/2/20	22	187.754
																					kcs1/2/20	22	169.548
																					kcs1/2/20	22	255.615
																					kcs1/2/20	22	275.583
																					kcs1/2/20	22	162.107
																					kcs1/2/20	22	143.885
																					kcs1/2/20	22	138.607
																					kcs1/2/20	22	182.151
																					kcs1/2/20	22	137.915
																					kcs1/2/20	22	146.011
																					kcs1/2/20	22	198.763
																					kcs1/2/20	22	183.105
																					kcs1/2/20	22	186.54
																					kcs1/2/20	22	169.215
																					kcs1/2/20	22	147.291
																					kcs1/2/20	22	153.586
																					kcs1/2/20	22	172.913
																					kcs1/2/20	22	189.725
																					kcs1/2/20	22	158.115
																					kcs1/2/20	22	253.817
																					kcs1/2/20	22	138.749
																					kcs1/2/20	22	182.593
																					kcs1/2/20	22	182.806
																					kcs1/2/20	22	172.451
																					kcs1/2/20	22	172.912
																					kcs1/2/20	22	162.941
																					kcs1/2/20	22	176.595
																					kcs1/2/20	22	207.914
																					kcs1/2/20	22	175.571
																					kcs1/2/20	22	203.221
																					kcs1/2/20	22	136.148
																					kcs1/2/20	22	206.505
																					kcs1/2/20	22	162.663
																					kcs1/2/20	28	215.372
																					kcs1/2/20	28	184.904
																					kcs1/2/20	28	225.544
																					kcs1/2/20	28	173.847
																					kcs1/2/20	28	212.747
																					kcs1/2/20	28	151.142
																					kcs1/2/20	28	153.491
																					kcs1/2/20	28	171.674
																					kcs1/2/20	28	183.988
																					kcs1/2/20	28	224.079
																					kcs1/2/20	28	222.651
																					kcs1/2/20	28	128.216
																					kcs1/2/20	28	254.729
																					kcs1/2/20	28	217.563
																					kcs1/2/20	28	241.543
																					kcs1/2/20	28	258.009
																					kcs1/2/20	28	220.009
																					kcs1/2/20	28	146.147
																					kcs1/2/20	28	157.925
																					kcs1/2/20	28	144.416
																					kcs1/2/20	28	141.274
																					kcs1/2/20	28	235.634
																					kcs1/2/20	28	219.285
																					kcs1/2/20	28	179.6
																					kcs1/2/20	28	173.272
																					kcs1/2/20	28	200.649
																					kcs1/2/20	28	189.986
																					kcs1/2/20	28	219.167
																					kcs1/2/20	28	206.527
																					kcs1/2/20	28	145.009
																					kcs1/2/20	28	172.953
																					kcs1/2/20	28	215.472
																					kcs1/2/20	28	140.326
																					kcs1/2/20	28	173.582
																					kcs1/2/20	28	190.737
																					kcs1/2/20	28	165.952
																					kcs1/2/20	28	157.687
																					kcs1/2/20	28	191.306
																					kcs1/2/20	28	171.747
																					kcs1/2/20	28	200.898
																					kcs1/2/20	28	170.665
																					kcs1/2/20	28	195.096
																					kcs1/2/20	28	218.479
																					kcs1/2/20	28	219.32
																					kcs1/2/20	28	221.837
																					kcs1/2/20	28	172.255
																					kcs1/2/20	28	209.153
																					kcs1/2/20	28	181.583
																					kcs1/2/20	28	184.354
																					kcs1/2/20	28	211.703
																					kcs1/2/20	28	218.231
																					kcs1/2/20	28	169.366
																					kcs1/2/20	28	241.763
																					kcs1/2/20	28	161.642
																					kcs1/2/20	28	180.076
																					kcs1/2/20	28	186.257
																					kcs1/2/20	28	206.356
																					kcs1/2/20	28	134.508
																					kcs1/2/20	28	192.391
																					kcs1/2/20	28	164.578
																					kcs1/2/20	28	173.004
																					kcs1/2/20	28	216.693
																					kcs1/2/20	28	161.654
																					kcs1/2/20	28	166.543
																					kcs1/2/20	28	197.159
																					kcs1/2/20	28	203.174
																					kcs1/2/20	28	222.058
																					kcs1/2/20	28	248.85
																					kcs1/2/20	28	166.868
																					kcs1/2/20	28	171.736
																					kcs1/2/20	28	160.716
																					kcs1/2/20	28	136.316
																					kcs1/2/20	28	158.267
																					kcs1/2/20	28	158.739
																					kcs1/2/20	28	126.067
																					kcs1/2/20	28	143.26
																					kcs1/2/20	28	153.951
																					kcs1/2/20	28	181.098
																					kcs1/2/20	28	219.6
																					zat10	22	148.663
																					zat10	22	155.085
																					zat10	22	248.875
																					zat10	22	168.647
																					zat10	22	203.126
																					zat10	22	173.606
																					zat10	22	135.371
																					zat10	22	176.246
																					zat10	22	139.928
																					zat10	22	203.325
																					zat10	22	149.499
																					zat10	22	157.823
																					zat10	22	158.461
																					zat10	22	164.188
																					zat10	22	159.18
																					zat10	22	127.108
																					zat10	22	229.389
																					zat10	22	166.178
																					zat10	22	131.623
																					zat10	22	210.632
																					zat10	22	156.696
																					zat10	22	149.703
																					zat10	22	164.823
																					zat10	22	158.301
																					zat10	22	246.361
																					zat10	22	224.642
																					zat10	22	249.731
																					zat10	22	168.38
																					zat10	22	163.518
																					zat10	22	171.357
																					zat10	22	145.831
																					zat10	22	162.002
																					zat10	22	167.924
																					zat10	22	236.49
																					zat10	22	198.352
																					zat10	22	232.465
																					zat10	22	193.242
																					zat10	22	128.73
																					zat10	22	159.878
																					zat10	22	153.694
																					zat10	22	173.341
																					zat10	22	218.89
																					zat10	22	118.803
																					zat10	22	222.746
																					zat10	22	199.596
																					zat10	22	161.062
																					zat10	22	171.941
																					zat10	22	251.469
																					zat10	22	213.688
																					zat10	22	184.556
																					zat10	22	197.656
																					zat10	22	241.143
																					zat10	22	234.667
																					zat10	22	217.305
																					zat10	22	171.838
																					zat10	22	191.219
																					zat10	22	191.452
																					zat10	22	189.72
																					zat10	22	264.629
																					zat10	22	170.028
																					zat10	22	178.521
																					zat10	22	142.001
																					zat10	22	166.626
																					zat10	22	303.51
																					zat10	22	206.661
																					zat10	22	259
																					zat10	22	225.628
																					zat10	22	185.091
																					zat10	22	208.163
																					zat10	22	155.125
																					zat10	22	177.636
																					zat10	22	240.514
																					zat10	22	182.609
																					zat10	22	218.395
																					zat10	22	206.842
																					zat10	22	166.76
																					zat10	22	239.988
																					zat10	22	293.803
																					zat10	22	237.209
																					zat10	22	134.288
																					zat10	22	164.693
																					zat10	22	171.129
																					zat10	22	177.851
																					zat10	22	137.111
																					zat10	22	151.63
																					zat10	22	214.205
																					zat10	22	244.048
																					zat10	22	246.016
																					zat10	22	223.554
																					zat10	22	229.251
																					zat10	22	178.968
																					zat10	22	162.659
																					zat10	22	223.85
																					zat10	22	190.42
																					zat10	22	229.368
																					zat10	22	203.365
																					zat10	22	147.797
																					zat10	22	181.025
																					zat10	22	244.519
																					zat10	22	204.473
																					zat10	22	190.186
																					zat10	22	186.172
																					zat10	22	193.131
																					zat10	22	205.226
																					zat10	22	236.96
																					zat10	22	161.414
																					zat10	22	233.747
																					zat10	22	139.501
																					zat10	22	199.045
																					zat10	22	143.81
																					zat10	22	209.991
																					zat10	22	200.212
																					zat10	22	174.246
																					zat10	22	240.88
																					zat10	22	144.038
																					zat10	22	216.226
																					zat10	22	271.831
																					zat10	22	144.637
																					zat10	22	198.259
																					zat10	22	235.073
																					zat10	22	189.928
																					zat10	22	190.975
																					zat10	22	152.177
																					zat10	22	177.857
																					zat10	22	129.168
																					zat10	22	163.043
																					zat10	22	229.713
																					zat10	22	151.688
																					zat10	22	176.794
																					zat10	22	132.459
																					zat10	22	167.281
																					zat10	22	134.442
																					zat10	22	124.58
																					zat10	22	189.682
																					zat10	22	196.94
																					zat10	28	185.548
																					zat10	28	193.331
																					zat10	28	289.657
																					zat10	28	229.635
																					zat10	28	250.779
																					zat10	28	129.448
																					zat10	28	175.113
																					zat10	28	176.366
																					zat10	28	172.076
																					zat10	28	232.406
																					zat10	28	191.532
																					zat10	28	158.89
																					zat10	28	163.753
																					zat10	28	180.554
																					zat10	28	172.813
																					zat10	28	200.28
																					zat10	28	204.626
																					zat10	28	196.816
																					zat10	28	144.929
																					zat10	28	183.63
																					zat10	28	183.339
																					zat10	28	209.18
																					zat10	28	222.748
																					zat10	28	229.264
																					zat10	28	202.31
																					zat10	28	227.833
																					zat10	28	259.771
																					zat10	28	146.45
																					zat10	28	159.893
																					zat10	28	158.998
																					zat10	28	224.058
																					zat10	28	243.241
																					zat10	28	202.109
																					zat10	28	184.406
																					zat10	28	216.739
																					zat10	28	262.236
																					zat10	28	170.614
																					zat10	28	223.317
																					zat10	28	239.049
																					zat10	28	163.909
																					zat10	28	183.067
																					zat10	28	185.417
																					zat10	28	183.187
																					zat10	28	175.943
																					zat10	28	209.1
																					zat10	28	202.153
																					zat10	28	225.485
																					zat10	28	247.414
																					zat10	28	181.943
																					zat10	28	189.338
																					zat10	28	236.532
																					zat10	28	199.195
																					zat10	28	232.516
																					zat10	28	226.895
																					zat10	28	205.905
																					zat10	28	168.765
																					zat10	28	171.216
																					zat10	28	152.068
																					zat10	28	194.777
																					zat10	28	162.908
																					zat10	28	224.364
																					zat10	28	175.323
																					zat10	28	230.706
																					zat10	28	205.65
																					zat10	28	200.073
																					zat10	28	199.551
																					zat10	28	158.467
																					zat10	28	165.665
																					zat10	28	185.739
																					zat10	28	156.42
																					zat10	28	187.024
																					zat10	28	210.347
																					zat10	28	237.559
																					zat10	28	134.76
																					zat10	28	171.465
																					zat10	28	160.313
																					zat10	28	161.409
																					zat10	28	173.168
																					zat10	28	147.725
																					zat10	28	158.014
																					zat10	28	163.88
																					zat10	28	186.267
																					zat10	28	213.066
																					zat10	28	222.335
																					zat10	28	188.491
																					ZAT10/zat10 #1	22	245.459
																					ZAT10/zat10 #1	22	214.769
																					ZAT10/zat10 #1	22	164.994
																					ZAT10/zat10 #1	22	278.925
																					ZAT10/zat10 #1	22	200.625
																					ZAT10/zat10 #1	22	220.379
																					ZAT10/zat10 #1	22	171.261
																					ZAT10/zat10 #1	22	219.209
																					ZAT10/zat10 #1	22	169.988
																					ZAT10/zat10 #1	22	200.607
																					ZAT10/zat10 #1	22	202.164
																					ZAT10/zat10 #1	22	186.975
																					ZAT10/zat10 #1	22	190.35
																					ZAT10/zat10 #1	22	233.702
																					ZAT10/zat10 #1	22	188.012
																					ZAT10/zat10 #1	22	190.365
																					ZAT10/zat10 #1	22	205.03
																					ZAT10/zat10 #1	22	204.408
																					ZAT10/zat10 #1	22	151.54
																					ZAT10/zat10 #1	22	144.934
																					ZAT10/zat10 #1	22	160.458
																					ZAT10/zat10 #1	22	190.35
																					ZAT10/zat10 #1	22	178.582
																					ZAT10/zat10 #1	22	164.068
																					ZAT10/zat10 #1	22	173.882
																					ZAT10/zat10 #1	22	135.384
																					ZAT10/zat10 #1	22	146.408
																					ZAT10/zat10 #1	22	174.967
																					ZAT10/zat10 #1	22	156.975
																					ZAT10/zat10 #1	22	201.45
																					ZAT10/zat10 #1	22	102.491
																					ZAT10/zat10 #1	22	128.924
																					ZAT10/zat10 #1	22	200.637
																					ZAT10/zat10 #1	22	232.008
																					ZAT10/zat10 #1	22	150.865
																					ZAT10/zat10 #1	22	167.17
																					ZAT10/zat10 #1	22	107.896
																					ZAT10/zat10 #1	22	233.427
																					ZAT10/zat10 #1	22	291.053
																					ZAT10/zat10 #1	22	225.657
																					ZAT10/zat10 #1	22	184.688
																					ZAT10/zat10 #1	22	169.566
																					ZAT10/zat10 #1	22	139.132
																					ZAT10/zat10 #1	22	178.853
																					ZAT10/zat10 #1	22	162.949
																					ZAT10/zat10 #1	22	190.384
																					ZAT10/zat10 #1	22	221.413
																					ZAT10/zat10 #1	22	173.971
																					ZAT10/zat10 #1	22	199.503
																					ZAT10/zat10 #1	22	181.796
																					ZAT10/zat10 #1	22	231.451
																					ZAT10/zat10 #1	22	161.554
																					ZAT10/zat10 #1	22	189.14
																					ZAT10/zat10 #1	22	265.614
																					ZAT10/zat10 #1	22	152.788
																					ZAT10/zat10 #1	22	141.09
																					ZAT10/zat10 #1	22	109.782
																					ZAT10/zat10 #1	22	185.418
																					ZAT10/zat10 #1	22	175.434
																					ZAT10/zat10 #1	22	158.186
																					ZAT10/zat10 #1	22	246.621
																					ZAT10/zat10 #1	22	132.337
																					ZAT10/zat10 #1	22	234.119
																					ZAT10/zat10 #1	22	293.785
																					ZAT10/zat10 #1	22	174.387
																					ZAT10/zat10 #1	22	155.084
																					ZAT10/zat10 #1	22	213.552
																					ZAT10/zat10 #1	22	157.297
																					ZAT10/zat10 #1	22	181.926
																					ZAT10/zat10 #1	22	220.439
																					ZAT10/zat10 #1	22	195.563
																					ZAT10/zat10 #1	22	186.98
																					ZAT10/zat10 #1	22	161.144
																					ZAT10/zat10 #1	22	248.067
																					ZAT10/zat10 #1	22	232.886
																					ZAT10/zat10 #1	22	163.378
																					ZAT10/zat10 #1	22	133.696
																					ZAT10/zat10 #1	22	162.91
																					ZAT10/zat10 #1	22	155.147
																					ZAT10/zat10 #1	22	111.861
																					ZAT10/zat10 #1	22	229.9
																					ZAT10/zat10 #1	22	177.114
																					ZAT10/zat10 #1	22	219.178
																					ZAT10/zat10 #1	22	213.786
																					ZAT10/zat10 #1	22	184.651
																					ZAT10/zat10 #1	22	324.34
																					ZAT10/zat10 #1	22	262.954
																					ZAT10/zat10 #1	22	178.873
																					ZAT10/zat10 #1	22	229.83
																					ZAT10/zat10 #1	22	138.816
																					ZAT10/zat10 #1	22	181.988
																					ZAT10/zat10 #1	22	214.872
																					ZAT10/zat10 #1	22	150.444
																					ZAT10/zat10 #1	22	147.214
																					ZAT10/zat10 #1	22	105.598
																					ZAT10/zat10 #1	22	130.645
																					ZAT10/zat10 #1	22	151.645
																					ZAT10/zat10 #1	22	251.1
																					ZAT10/zat10 #1	22	133.124
																					ZAT10/zat10 #1	22	175.684
																					ZAT10/zat10 #1	22	174.557
																					ZAT10/zat10 #1	22	284.438
																					ZAT10/zat10 #1	22	200.654
																					ZAT10/zat10 #1	22	144.688
																					ZAT10/zat10 #1	22	161.08
																					ZAT10/zat10 #1	22	202.829
																					ZAT10/zat10 #1	22	277.005
																					ZAT10/zat10 #1	22	228.402
																					ZAT10/zat10 #1	22	151.618
																					ZAT10/zat10 #1	22	179.116
																					ZAT10/zat10 #1	22	174.961
																					ZAT10/zat10 #1	22	261.057
																					ZAT10/zat10 #1	22	200.534
																					ZAT10/zat10 #1	22	157.744
																					ZAT10/zat10 #1	22	294.186
																					ZAT10/zat10 #1	22	177.788
																					ZAT10/zat10 #1	22	280.338
																					ZAT10/zat10 #1	22	269.133
																					ZAT10/zat10 #1	22	224.707
																					ZAT10/zat10 #1	22	185.316
																					ZAT10/zat10 #1	22	163.588
																					ZAT10/zat10 #1	22	281.893
																					ZAT10/zat10 #1	22	230.165
																					ZAT10/zat10 #1	22	181.561
																					ZAT10/zat10 #1	22	150.856
																					ZAT10/zat10 #1	22	221.54
																					ZAT10/zat10 #1	22	197.656
																					ZAT10/zat10 #1	22	258.334
																					ZAT10/zat10 #1	22	122.686
																					ZAT10/zat10 #1	22	159.469
																					ZAT10/zat10 #1	22	201.253
																					ZAT10/zat10 #1	22	149.722
																					ZAT10/zat10 #1	22	130.272
																					ZAT10/zat10 #1	22	213.558
																					ZAT10/zat10 #1	22	221.11
																					ZAT10/zat10 #1	22	137.239
																					ZAT10/zat10 #1	22	162.101
																					ZAT10/zat10 #1	22	136.563
																					ZAT10/zat10 #1	22	264.287
																					ZAT10/zat10 #1	22	293.503
																					ZAT10/zat10 #1	22	188.241
																					ZAT10/zat10 #1	22	291.425
																					ZAT10/zat10 #1	22	245.245
																					ZAT10/zat10 #1	22	242.69
																					ZAT10/zat10 #1	22	225.915
																					ZAT10/zat10 #1	22	215.038
																					ZAT10/zat10 #1	22	216.048
																					ZAT10/zat10 #1	22	264.677
																					ZAT10/zat10 #1	22	250.486
																					ZAT10/zat10 #1	22	283.953
																					ZAT10/zat10 #1	22	279.477
																					ZAT10/zat10 #1	22	249.878
																					ZAT10/zat10 #1	22	268.246
																					ZAT10/zat10 #1	22	144.944
																					ZAT10/zat10 #1	22	199.109
																					ZAT10/zat10 #1	22	164.383
																					ZAT10/zat10 #1	22	150.428
																					ZAT10/zat10 #1	22	183.342
																					ZAT10/zat10 #1	22	199.206
																					ZAT10/zat10 #1	22	199.602
																					ZAT10/zat10 #1	22	134.194
																					ZAT10/zat10 #1	22	254.843
																					ZAT10/zat10 #1	22	145.885
																					ZAT10/zat10 #1	22	300.395
																					ZAT10/zat10 #1	28	219.803
																					ZAT10/zat10 #1	28	222.808
																					ZAT10/zat10 #1	28	231.781
																					ZAT10/zat10 #1	28	227.441
																					ZAT10/zat10 #1	28	166.488
																					ZAT10/zat10 #1	28	174.035
																					ZAT10/zat10 #1	28	252.09
																					ZAT10/zat10 #1	28	242.449
																					ZAT10/zat10 #1	28	139.303
																					ZAT10/zat10 #1	28	148.836
																					ZAT10/zat10 #1	28	176.506
																					ZAT10/zat10 #1	28	285.962
																					ZAT10/zat10 #1	28	295.642
																					ZAT10/zat10 #1	28	227.569
																					ZAT10/zat10 #1	28	236.335
																					ZAT10/zat10 #1	28	219.139
																					ZAT10/zat10 #1	28	356.571
																					ZAT10/zat10 #1	28	203.157
																					ZAT10/zat10 #1	28	246.735
																					ZAT10/zat10 #1	28	187.547
																					ZAT10/zat10 #1	28	285.702
																					ZAT10/zat10 #1	28	146.524
																					ZAT10/zat10 #1	28	255.216
																					ZAT10/zat10 #1	28	238.685
																					ZAT10/zat10 #1	28	363.992
																					ZAT10/zat10 #1	28	160.616
																					ZAT10/zat10 #1	28	328.787
																					ZAT10/zat10 #1	28	222.025
																					ZAT10/zat10 #1	28	185.349
																					ZAT10/zat10 #1	28	180.717
																					ZAT10/zat10 #1	28	308.693
																					ZAT10/zat10 #1	28	303.996
																					ZAT10/zat10 #1	28	184.391
																					ZAT10/zat10 #1	28	291.475
																					ZAT10/zat10 #1	28	191.453
																					ZAT10/zat10 #1	28	200.457
																					ZAT10/zat10 #1	28	155.055
																					ZAT10/zat10 #1	28	203.543
																					ZAT10/zat10 #1	28	225.882
																					ZAT10/zat10 #1	28	136.902
																					ZAT10/zat10 #1	28	228.251
																					ZAT10/zat10 #1	28	213.614
																					ZAT10/zat10 #1	28	293.566
																					ZAT10/zat10 #1	28	177.584
																					ZAT10/zat10 #1	28	158.534
																					ZAT10/zat10 #1	28	144.365
																					ZAT10/zat10 #1	28	274.953
																					ZAT10/zat10 #1	28	233.472
																					ZAT10/zat10 #1	28	228.439
																					ZAT10/zat10 #1	28	210.929
																					ZAT10/zat10 #1	28	211.816
																					ZAT10/zat10 #1	28	287.096
																					ZAT10/zat10 #1	28	198.269
																					ZAT10/zat10 #1	28	225.923
																					ZAT10/zat10 #1	28	178.645
																					ZAT10/zat10 #1	28	315.92
																					ZAT10/zat10 #1	28	287.494
																					ZAT10/zat10 #1	28	223.992
																					ZAT10/zat10 #1	28	275.164
																					ZAT10/zat10 #1	28	179.933
																					ZAT10/zat10 #1	28	200.867
																					ZAT10/zat10 #1	28	142.353
																					ZAT10/zat10 #1	28	279.717
																					ZAT10/zat10 #1	28	193.011
																					ZAT10/zat10 #1	28	310.526
																					ZAT10/zat10 #1	28	209.482
																					ZAT10/zat10 #1	28	132.549
																					ZAT10/zat10 #1	28	168.131
																					ZAT10/zat10 #1	28	191.78
																					ZAT10/zat10 #1	28	200.273
																					ZAT10/zat10 #1	28	264.087
																					ZAT10/zat10 #1	28	145.753
																					ZAT10/zat10 #1	28	260.497
																					ZAT10/zat10 #1	28	241.911
																					ZAT10/zat10 #1	28	260.189
																					ZAT10/zat10 #1	28	141.306
																					ZAT10/zat10 #1	28	128.84
																					ZAT10/zat10 #1	28	133.85
																					ZAT10/zat10 #1	28	111.56
																					ZAT10/zat10 #1	28	234.154
																					ZAT10/zat10 #1	28	176.257
																					ZAT10/zat10 #1	28	138.67
																					ZAT10/zat10 #1	28	231.322
																					ZAT10/zat10 #1	28	234.608
																					ZAT10/zat10 #1	28	194.672
																					ZAT10/zat10 #1	28	206.107
																					ZAT10/zat10 #1	28	239.373
																					ZAT10/zat10 #1	28	238.669
																					ZAT10/zat10 #1	28	245.244
																					ZAT10/zat10 #1	28	269.485
																					ZAT10/zat10 #1	28	182.919
																					ZAT10/zat10 #1	28	174.723
																					ZAT10/zat10 #1	28	258.324
																					ZAT10/zat10 #1	28	185.216
																					ZAT10/zat10 #1	28	164.652
																					ZAT10/zat10 #1	28	168.877
																					ZAT10/zat10 #1	28	156.289
																					ZAT10/zat10 #1	28	146.401
																					ZAT10/zat10 #1	28	177.829
																					ZAT10/zat10 #1	28	244.499
																					ZAT10/zat10 #1	28	172.046
																					ZAT10/zat10 #1	28	173.06
																					ZAT10/zat10 #1	28	161.357
																					ZAT10/zat10 #1	28	162.434
																					ZAT10/zat10 #1	28	219.121
																					ZAT10/zat10 #1	28	210.519
																					ZAT10/zat10 #1	28	242.771
																					ZAT10/zat10 #1	28	182.002
																					ZAT10/zat10 #1	28	199.859
																					ZAT10/zat10 #1	28	230.06
																					ZAT10/zat10 #1	28	245.66
																					ZAT10/zat10 #1	28	210.947
																					ZAT10/zat10 #1	28	140.096
																					ZAT10/zat10 #1	28	191.989
																					ZAT10/zat10 #1	28	210.915
																					ZAT10/zat10 #1	28	169.551
																					ZAT10/zat10 #1	28	189.488
																					ZAT10/zat10 #1	28	202.72
																					ZAT10/zat10 #1	28	200.358
																					ZAT10/zat10 #1	28	236.666
																					ZAT10/zat10 #1	28	158.521
																					ZAT10/zat10 #1	28	177.455
																					ZAT10/zat10 #1	28	184.712
																					ZAT10/zat10 #1	28	234.439
																					ZAT10/zat10 #1	28	240.498
																					ZAT10/zat10 #1	28	202.515
																					ZAT10/zat10 #1	28	279.737
																					ZAT10/zat10 #1	28	221.235
																					ZAT10/zat10 #1	28	364.279
																					ZAT10/zat10 #1	28	310.355
																					ZAT10/zat10 #1	28	315.576
																					ZAT10/zat10 #1	28	173.607
																					ZAT10/zat10 #1	28	382.99
																					ZAT10/zat10 #1	28	244.659
																					ZAT10/zat10 #1	28	354.857
																					ZAT10/zat10 #1	28	367.249
																					ZAT10/zat10 #1	28	125.78
																					ZAT10/zat10 #1	28	155.115
																					ZAT10/zat10 #1	28	145.577
																					ZAT10/zat10 #1	28	180.159
																					ZAT10/zat10 #1	28	164.108
																					ZAT10/zat10 #1	28	145.134
																					ZAT10/zat10 #1	28	293.092
																					ZAT10/zat10 #1	28	283.312
																					ZAT10/zat10 #1	28	290.732
																					ZAT10/zat10 #1	28	153.563
																					ZAT10/zat10 #1	28	335.066
																					ZAT10/zat10 #1	28	212.46
																					ZAT10/zat10 #1	28	273.652
																					ZAT10/zat10 #1	28	194.33
																					ZAT10/zat10 #1	28	198.875
																					ZAT10/zat10 #1	28	218.372
																					ZAT10/zat10 #1	28	239.214
																					ZAT10/zat10 #1	28	173.974
																					ZAT10/zat10 #1	28	268.775
																					ZAT10/zat10 #1	28	241.589
																					ZAT10/zat10 #1	28	226.397
																					ZAT10/zat10 #1	28	151.791
																					ZAT10/zat10 #1	28	186.142
																					ZAT10/zat10 #1	28	219.377
																					ZAT10/zat10 #1	28	234.154
																					ZAT10/zat10 #1	28	303.32
																					ZAT10/zat10 #1	28	201.378
																					ZAT10/zat10 #1	28	165.977
																					ZAT10/zat10 #1	28	214.532
																					ZAT10/zat10 #1	28	199.012
																					ZAT10/zat10 #1	28	171.69
																					ZAT10/zat10 #1	28	257.568
																					ZAT10/zat10 #1	28	205.585
																					ZAT10/zat10 #1	28	261.183
																					ZAT10/zat10 #1	28	201.45
																					ZAT10/zat10 #1	28	257.483
																					ZAT10/zat10 #1	28	246.908
																					ZAT10/zat10 #1	28	210.167
																					ZAT10/zat10 #1	28	264.67
																					ZAT10/zat10 #1	28	242.975
																					ZAT10/zat10 #1	28	233.681
																					ZAT10/zat10 #1	28	216.756
																					ZAT10/zat10 #1	28	275.946
																					ZAT10/zat10 #1	28	293.568
																					ZAT10/zat10 #1	28	384.734
																					ZAT10/zat10 #1	28	426.587
																					ZAT10/zat10 #1	28	429.56
																					ZAT10/zat10 #1	28	205.012
																					ZAT10/zat10 #1	28	313.555
																					ZAT10/zat10 #1	28	348.738
																					ZAT10/zat10 #1	28	230.707
																					ZAT10/zat10 #1	28	322.143
																					ZAT10/zat10 #1	28	157.848
																					ZAT10/zat10 #1	28	187.228
																					ZAT10/zat10 #1	28	166.384
																					ZAT10/zat10 #1	28	253.649
																					ZAT10/zat10 #1	28	254.08
																					ZAT10/zat10 #1	28	152.22
																					ZAT10/zat10 #1	28	330.599
																					ZAT10/zat10 #1	28	196.365
																					ZAT10/zat10 #1	28	179.294
																					ZAT10/zat10 #1	28	253.671
																					ZAT10/zat10 #1	28	119.478
																					ZAT10/zat10 #1	28	168.351
																					ZAT10/zat10 #1	28	225.433
																					ZAT10/zat10 #1	28	146.919
																					ZAT10/zat10 #1	28	141.16
																					ZAT10/zat10 #1	28	209.369
																					ZAT10/zat10 #1	28	212.811
																					ZAT10/zat10 #1	28	177.854
																					ZAT10/zat10 #1	28	159.589
																					ZAT10/zat10 #1	28	141.544
																					ZAT10/zat10 #1	28	220.401
																					ZAT10/zat10 #1	28	215.844
																					ZAT10/zat10 #1	28	223.316
																					ZAT10/zat10 #1	28	400.782
																					ZAT10/zat10 #1	28	353.557
																					ZAT10/zat10 #1	28	262.096
																					ZAT10/zat10 #1	28	177.25
																					ZAT10/zat10 #1	28	395
																					ZAT10/zat10 #1	28	219.136
																					ZAT10/zat10 #1	28	193.975
																					ZAT10/zat10 #2	22	205.815
																					ZAT10/zat10 #2	22	124.204
																					ZAT10/zat10 #2	22	150.199
																					ZAT10/zat10 #2	22	166.381
																					ZAT10/zat10 #2	22	225.541
																					ZAT10/zat10 #2	22	199.074
																					ZAT10/zat10 #2	22	249.96
																					ZAT10/zat10 #2	22	101.58
																					ZAT10/zat10 #2	22	218.025
																					ZAT10/zat10 #2	22	197.926
																					ZAT10/zat10 #2	22	208.815
																					ZAT10/zat10 #2	22	263.578
																					ZAT10/zat10 #2	22	160.871
																					ZAT10/zat10 #2	22	155.132
																					ZAT10/zat10 #2	22	168.07
																					ZAT10/zat10 #2	22	244.88
																					ZAT10/zat10 #2	22	142.63
																					ZAT10/zat10 #2	22	142.02
																					ZAT10/zat10 #2	22	180.779
																					ZAT10/zat10 #2	22	220.379
																					ZAT10/zat10 #2	22	202.454
																					ZAT10/zat10 #2	22	228.46
																					ZAT10/zat10 #2	22	146.865
																					ZAT10/zat10 #2	22	135.52
																					ZAT10/zat10 #2	22	159.465
																					ZAT10/zat10 #2	22	156.601
																					ZAT10/zat10 #2	22	107.267
																					ZAT10/zat10 #2	22	173.797
																					ZAT10/zat10 #2	22	190.7
																					ZAT10/zat10 #2	22	136.816
																					ZAT10/zat10 #2	22	169.577
																					ZAT10/zat10 #2	22	166.23
																					ZAT10/zat10 #2	22	148.23
																					ZAT10/zat10 #2	22	244.734
																					ZAT10/zat10 #2	22	246.172
																					ZAT10/zat10 #2	22	237.261
																					ZAT10/zat10 #2	22	167.301
																					ZAT10/zat10 #2	22	316.698
																					ZAT10/zat10 #2	22	316.698
																					ZAT10/zat10 #2	22	197.913
																					ZAT10/zat10 #2	22	254.134
																					ZAT10/zat10 #2	22	171.214
																					ZAT10/zat10 #2	22	199.397
																					ZAT10/zat10 #2	22	166.542
																					ZAT10/zat10 #2	22	163.077
																					ZAT10/zat10 #2	22	246.948
																					ZAT10/zat10 #2	22	163.295
																					ZAT10/zat10 #2	22	183.826
																					ZAT10/zat10 #2	22	184.086
																					ZAT10/zat10 #2	22	272.476
																					ZAT10/zat10 #2	22	233.947
																					ZAT10/zat10 #2	22	242.047
																					ZAT10/zat10 #2	22	246.543
																					ZAT10/zat10 #2	22	239.541
																					ZAT10/zat10 #2	22	226.479
																					ZAT10/zat10 #2	22	288.733
																					ZAT10/zat10 #2	22	156.159
																					ZAT10/zat10 #2	22	189.516
																					ZAT10/zat10 #2	22	157.678
																					ZAT10/zat10 #2	22	160.186
																					ZAT10/zat10 #2	22	200.661
																					ZAT10/zat10 #2	22	154.626
																					ZAT10/zat10 #2	22	208.566
																					ZAT10/zat10 #2	22	158.783
																					ZAT10/zat10 #2	22	144.696
																					ZAT10/zat10 #2	22	201.531
																					ZAT10/zat10 #2	22	241.654
																					ZAT10/zat10 #2	22	281.116
																					ZAT10/zat10 #2	22	219.946
																					ZAT10/zat10 #2	22	253.343
																					ZAT10/zat10 #2	22	188.66
																					ZAT10/zat10 #2	22	156.937
																					ZAT10/zat10 #2	22	230.397
																					ZAT10/zat10 #2	22	181.23
																					ZAT10/zat10 #2	22	226.063
																					ZAT10/zat10 #2	22	225.1
																					ZAT10/zat10 #2	22	154.38
																					ZAT10/zat10 #2	22	190.261
																					ZAT10/zat10 #2	22	174.644
																					ZAT10/zat10 #2	22	197.564
																					ZAT10/zat10 #2	22	189.471
																					ZAT10/zat10 #2	22	146.36
																					ZAT10/zat10 #2	22	183.112
																					ZAT10/zat10 #2	22	164.708
																					ZAT10/zat10 #2	22	198.588
																					ZAT10/zat10 #2	22	160.961
																					ZAT10/zat10 #2	22	177.973
																					ZAT10/zat10 #2	22	247.951
																					ZAT10/zat10 #2	22	224.857
																					ZAT10/zat10 #2	22	224.045
																					ZAT10/zat10 #2	22	202.05
																					ZAT10/zat10 #2	22	214.458
																					ZAT10/zat10 #2	22	219.341
																					ZAT10/zat10 #2	22	255.629
																					ZAT10/zat10 #2	22	167.001
																					ZAT10/zat10 #2	22	207.661
																					ZAT10/zat10 #2	22	182.067
																					ZAT10/zat10 #2	22	238.715
																					ZAT10/zat10 #2	22	241.279
																					ZAT10/zat10 #2	22	207.934
																					ZAT10/zat10 #2	22	177.023
																					ZAT10/zat10 #2	22	136.954
																					ZAT10/zat10 #2	22	130.513
																					ZAT10/zat10 #2	22	235.461
																					ZAT10/zat10 #2	22	212.886
																					ZAT10/zat10 #2	22	252.537
																					ZAT10/zat10 #2	22	143.638
																					ZAT10/zat10 #2	22	127.389
																					ZAT10/zat10 #2	22	172.456
																					ZAT10/zat10 #2	22	133.14
																					ZAT10/zat10 #2	22	178.398
																					ZAT10/zat10 #2	22	113.073
																					ZAT10/zat10 #2	22	147.544
																					ZAT10/zat10 #2	22	158.743
																					ZAT10/zat10 #2	22	173.251
																					ZAT10/zat10 #2	22	190.35
																					ZAT10/zat10 #2	22	215.338
																					ZAT10/zat10 #2	22	212.953
																					ZAT10/zat10 #2	22	197.531
																					ZAT10/zat10 #2	22	187.417
																					ZAT10/zat10 #2	22	195.774
																					ZAT10/zat10 #2	22	188.649
																					ZAT10/zat10 #2	22	246.086
																					ZAT10/zat10 #2	22	222.769
																					ZAT10/zat10 #2	22	184.932
																					ZAT10/zat10 #2	22	215.792
																					ZAT10/zat10 #2	22	239.876
																					ZAT10/zat10 #2	22	150.444
																					ZAT10/zat10 #2	22	157.099
																					ZAT10/zat10 #2	22	148.371
																					ZAT10/zat10 #2	22	127.498
																					ZAT10/zat10 #2	22	216.517
																					ZAT10/zat10 #2	22	253.747
																					ZAT10/zat10 #2	22	153.73
																					ZAT10/zat10 #2	22	142.83
																					ZAT10/zat10 #2	22	161.222
																					ZAT10/zat10 #2	22	193.393
																					ZAT10/zat10 #2	22	172.046
																					ZAT10/zat10 #2	22	223.292
																					ZAT10/zat10 #2	22	200.376
																					ZAT10/zat10 #2	22	186.205
																					ZAT10/zat10 #2	22	160.317
																					ZAT10/zat10 #2	22	228.215
																					ZAT10/zat10 #2	22	218.071
																					ZAT10/zat10 #2	22	148.753
																					ZAT10/zat10 #2	22	164.891
																					ZAT10/zat10 #2	22	236.355
																					ZAT10/zat10 #2	22	270.26
																					ZAT10/zat10 #2	22	204.136
																					ZAT10/zat10 #2	22	138.954
																					ZAT10/zat10 #2	22	169.453
																					ZAT10/zat10 #2	22	150.357
																					ZAT10/zat10 #2	22	190.842
																					ZAT10/zat10 #2	22	162.649
																					ZAT10/zat10 #2	22	169.845
																					ZAT10/zat10 #2	22	217.403
																					ZAT10/zat10 #2	22	156.583
																					ZAT10/zat10 #2	22	171.05
																					ZAT10/zat10 #2	22	288.145
																					ZAT10/zat10 #2	22	128.306
																					ZAT10/zat10 #2	22	110.285
																					ZAT10/zat10 #2	22	131.888
																					ZAT10/zat10 #2	22	181.009
																					ZAT10/zat10 #2	22	194.217
																					ZAT10/zat10 #2	22	162.22
																					ZAT10/zat10 #2	22	176.503
																					ZAT10/zat10 #2	22	219.688
																					ZAT10/zat10 #2	22	151.645
																					ZAT10/zat10 #2	22	149.981
																					ZAT10/zat10 #2	22	167.681
																					ZAT10/zat10 #2	22	191.037
																					ZAT10/zat10 #2	22	218.01
																					ZAT10/zat10 #2	22	273.034
																					ZAT10/zat10 #2	22	226.237
																					ZAT10/zat10 #2	22	219.415
																					ZAT10/zat10 #2	22	257.634
																					ZAT10/zat10 #2	22	223.415
																					ZAT10/zat10 #2	22	164.63
																					ZAT10/zat10 #2	22	166.725
																					ZAT10/zat10 #2	22	189.922
																					ZAT10/zat10 #2	22	202.401
																					ZAT10/zat10 #2	22	235.073
																					ZAT10/zat10 #2	22	140.14
																					ZAT10/zat10 #2	22	299.553
																					ZAT10/zat10 #2	22	243.127
																					ZAT10/zat10 #2	22	250.34
																					ZAT10/zat10 #2	22	187.729
																					ZAT10/zat10 #2	22	151.907
																					ZAT10/zat10 #2	22	183.832
																					ZAT10/zat10 #2	22	130.891
																					ZAT10/zat10 #2	22	159.89
																					ZAT10/zat10 #2	22	201.342
																					ZAT10/zat10 #2	22	222.178
																					ZAT10/zat10 #2	22	197.138
																					ZAT10/zat10 #2	22	156.734
																					ZAT10/zat10 #2	22	153.165
																					ZAT10/zat10 #2	22	150.291
																					ZAT10/zat10 #2	22	175.62
																					ZAT10/zat10 #2	22	157.17
																					ZAT10/zat10 #2	22	185.873
																					ZAT10/zat10 #2	22	203.64
																					ZAT10/zat10 #2	22	129.191
																					ZAT10/zat10 #2	22	189.502
																					ZAT10/zat10 #2	22	198.474
																					ZAT10/zat10 #2	22	199.065
																					ZAT10/zat10 #2	22	165.201
																					ZAT10/zat10 #2	22	184.776
																					ZAT10/zat10 #2	22	157.631
																					ZAT10/zat10 #2	22	159.066
																					ZAT10/zat10 #2	22	186.468
																					ZAT10/zat10 #2	22	200.746
																					ZAT10/zat10 #2	22	143.414
																					ZAT10/zat10 #2	22	196.883
																					ZAT10/zat10 #2	22	235.302
																					ZAT10/zat10 #2	22	242.639
																					ZAT10/zat10 #2	22	147.053
																					ZAT10/zat10 #2	22	143.692
																					ZAT10/zat10 #2	22	189.404
																					ZAT10/zat10 #2	22	192.396
																					ZAT10/zat10 #2	22	170.101
																					ZAT10/zat10 #2	22	214.205
																					ZAT10/zat10 #2	22	206.467
																					ZAT10/zat10 #2	22	176.248
																					ZAT10/zat10 #2	22	119.688
																					ZAT10/zat10 #2	22	240.946
																					ZAT10/zat10 #2	22	242.31
																					ZAT10/zat10 #2	22	236.009
																					ZAT10/zat10 #2	22	239.607
																					ZAT10/zat10 #2	22	158.999
																					ZAT10/zat10 #2	22	264.022
																					ZAT10/zat10 #2	22	234.035
																					ZAT10/zat10 #2	22	259.02
																					ZAT10/zat10 #2	22	179.939
																					ZAT10/zat10 #2	22	150.275
																					ZAT10/zat10 #2	22	115.616
																					ZAT10/zat10 #2	22	137.92
																					ZAT10/zat10 #2	22	119.979
																					ZAT10/zat10 #2	22	153.953
																					ZAT10/zat10 #2	22	168.589
																					ZAT10/zat10 #2	22	206.76
																					ZAT10/zat10 #2	28	223.43
																					ZAT10/zat10 #2	28	172.088
																					ZAT10/zat10 #2	28	225.477
																					ZAT10/zat10 #2	28	198.694
																					ZAT10/zat10 #2	28	256.359
																					ZAT10/zat10 #2	28	153.156
																					ZAT10/zat10 #2	28	277.814
																					ZAT10/zat10 #2	28	218.058
																					ZAT10/zat10 #2	28	262.377
																					ZAT10/zat10 #2	28	157.38
																					ZAT10/zat10 #2	28	179.885
																					ZAT10/zat10 #2	28	144.828
																					ZAT10/zat10 #2	28	208.247
																					ZAT10/zat10 #2	28	245.76
																					ZAT10/zat10 #2	28	202.161
																					ZAT10/zat10 #2	28	217.745
																					ZAT10/zat10 #2	28	196.913
																					ZAT10/zat10 #2	28	187.147
																					ZAT10/zat10 #2	28	203.212
																					ZAT10/zat10 #2	28	236.227
																					ZAT10/zat10 #2	28	126.715
																					ZAT10/zat10 #2	28	164.804
																					ZAT10/zat10 #2	28	182.782
																					ZAT10/zat10 #2	28	186.714
																					ZAT10/zat10 #2	28	178.139
																					ZAT10/zat10 #2	28	224.883
																					ZAT10/zat10 #2	28	274.452
																					ZAT10/zat10 #2	28	154.562
																					ZAT10/zat10 #2	28	217.973
																					ZAT10/zat10 #2	28	286.764
																					ZAT10/zat10 #2	28	267.317
																					ZAT10/zat10 #2	28	161.482
																					ZAT10/zat10 #2	28	243.759
																					ZAT10/zat10 #2	28	189.488
																					ZAT10/zat10 #2	28	156.769
																					ZAT10/zat10 #2	28	170.842
																					ZAT10/zat10 #2	28	254.726
																					ZAT10/zat10 #2	28	205.229
																					ZAT10/zat10 #2	28	275.008
																					ZAT10/zat10 #2	28	158.343
																					ZAT10/zat10 #2	28	255.299
																					ZAT10/zat10 #2	28	266.792
																					ZAT10/zat10 #2	28	247.358
																					ZAT10/zat10 #2	28	261.222
																					ZAT10/zat10 #2	28	269.246
																					ZAT10/zat10 #2	28	176.193
																					ZAT10/zat10 #2	28	309.829
																					ZAT10/zat10 #2	28	302.351
																					ZAT10/zat10 #2	28	302.466
																					ZAT10/zat10 #2	28	239.593
																					ZAT10/zat10 #2	28	232.053
																					ZAT10/zat10 #2	28	248.965
																					ZAT10/zat10 #2	28	176.108
																					ZAT10/zat10 #2	28	194.532
																					ZAT10/zat10 #2	28	183.726
																					ZAT10/zat10 #2	28	196.877
																					ZAT10/zat10 #2	28	243.229
																					ZAT10/zat10 #2	28	227.603
																					ZAT10/zat10 #2	28	210.372
																					ZAT10/zat10 #2	28	139.719
																					ZAT10/zat10 #2	28	209.526
																					ZAT10/zat10 #2	28	259.448
																					ZAT10/zat10 #2	28	274.435
																					ZAT10/zat10 #2	28	300.812
																					ZAT10/zat10 #2	28	218.025
																					ZAT10/zat10 #2	28	261.136
																					ZAT10/zat10 #2	28	226.702
																					ZAT10/zat10 #2	28	290.254
																					ZAT10/zat10 #2	28	211.9
																					ZAT10/zat10 #2	28	257.524
																					ZAT10/zat10 #2	28	230.665
																					ZAT10/zat10 #2	28	159.589
																					ZAT10/zat10 #2	28	158.654
																					ZAT10/zat10 #2	28	193.665
																					ZAT10/zat10 #2	28	159.49
																					ZAT10/zat10 #2	28	212.458
																					ZAT10/zat10 #2	28	138.26
																					ZAT10/zat10 #2	28	103.608
																					ZAT10/zat10 #2	28	192.182
																					ZAT10/zat10 #2	28	166.396
																					ZAT10/zat10 #2	28	184.05
																					ZAT10/zat10 #2	28	122.314
																					ZAT10/zat10 #2	28	263.603
																					ZAT10/zat10 #2	28	189.22
																					ZAT10/zat10 #2	28	188.369
																					ZAT10/zat10 #2	28	137.363
																					ZAT10/zat10 #2	28	217.16
																					ZAT10/zat10 #2	28	179.278
																					ZAT10/zat10 #2	28	239.15
																					ZAT10/zat10 #2	28	161.723
																					ZAT10/zat10 #2	28	141.823
																					ZAT10/zat10 #2	28	208.234
																					ZAT10/zat10 #2	28	180.305
																					ZAT10/zat10 #2	28	186.195
																					ZAT10/zat10 #2	28	224.301
																					ZAT10/zat10 #2	28	239.9
																					ZAT10/zat10 #2	28	178.762
																					ZAT10/zat10 #2	28	201.551
																					ZAT10/zat10 #2	28	344.753
																					ZAT10/zat10 #2	28	239.099
																					ZAT10/zat10 #2	28	305.177
																					ZAT10/zat10 #2	28	96.655
																					ZAT10/zat10 #2	28	313.202
																					ZAT10/zat10 #2	28	215.247
																					ZAT10/zat10 #2	28	170.941
																					ZAT10/zat10 #2	28	290.072
																					ZAT10/zat10 #2	28	149.556
																					ZAT10/zat10 #2	28	182.861
																					ZAT10/zat10 #2	28	183.187
																					ZAT10/zat10 #2	28	262.144
																					ZAT10/zat10 #2	28	150.533
																					ZAT10/zat10 #2	28	146.149
																					ZAT10/zat10 #2	28	199.625
																					ZAT10/zat10 #2	28	152.32
																					ZAT10/zat10 #2	28	229.833
																					ZAT10/zat10 #2	28	172.634
																					ZAT10/zat10 #2	28	161.447
																					ZAT10/zat10 #2	28	229.168
																					ZAT10/zat10 #2	28	199.678
																					ZAT10/zat10 #2	28	198.948
																					ZAT10/zat10 #2	28	278.533
																					ZAT10/zat10 #2	28	163.79
																					ZAT10/zat10 #2	28	217.072
																					ZAT10/zat10 #2	28	152.961
																					ZAT10/zat10 #2	28	234.81
																					ZAT10/zat10 #2	28	222.554
																					ZAT10/zat10 #2	28	252.432
																					ZAT10/zat10 #2	28	197.143
																					ZAT10/zat10 #2	28	197.051
																					ZAT10/zat10 #2	28	222.802
																					ZAT10/zat10 #2	28	368.92
																					ZAT10/zat10 #2	28	158.186
																					ZAT10/zat10 #2	28	133.686
																					ZAT10/zat10 #2	28	192.797
																					ZAT10/zat10 #2	28	194.524
																					ZAT10/zat10 #2	28	206.33
																					ZAT10/zat10 #2	28	188.796
																					ZAT10/zat10 #2	28	170.394
																					ZAT10/zat10 #2	28	160.058
																					ZAT10/zat10 #2	28	183.586
																					ZAT10/zat10 #2	28	158.637
																					ZAT10/zat10 #2	28	184.644
																					ZAT10/zat10 #2	28	143.151
																					ZAT10/zat10 #2	28	163.897
																					ZAT10/zat10 #2	28	167.263
																					ZAT10/zat10 #2	28	172.032
																					ZAT10/zat10 #2	28	116.223
																					ZAT10/zat10 #2	28	300.239
																					ZAT10/zat10 #2	28	152.914
																					ZAT10/zat10 #2	28	178.884
																					ZAT10/zat10 #2	28	183.287
																					ZAT10/zat10 #2	28	163.488
																					ZAT10/zat10 #2	28	359.88
																					ZAT10/zat10 #2	28	230.433
																					ZAT10/zat10 #2	28	256.82
																					ZAT10/zat10 #2	28	154.481
																					ZAT10/zat10 #2	28	131.753
																					ZAT10/zat10 #2	28	149.248
																					ZAT10/zat10 #2	28	167.531
																					ZAT10/zat10 #2	28	214.538
																					ZAT10/zat10 #2	28	230.022
																					ZAT10/zat10 #2	28	245.23
																					ZAT10/zat10 #2	28	184.608
																					ZAT10/zat10 #2	28	224.899
																					ZAT10/zat10 #2	28	288.967
																					ZAT10/zat10 #2	28	207.448
																					ZAT10/zat10 #2	28	190.458
																					ZAT10/zat10 #2	28	178.942
																					ZAT10/zat10 #2	28	228.757
																					ZAT10/zat10 #2	28	275.356
																					ZAT10/zat10 #2	28	261.599
																					ZAT10/zat10 #2	28	227.273
																					ZAT10/zat10 #2	28	222.675
																					ZAT10/zat10 #2	28	273.546
																					ZAT10/zat10 #2	28	350.628
																					ZAT10/zat10 #2	28	218.584
																					ZAT10/zat10 #2	28	234.878
																					ZAT10/zat10 #2	28	278.871
																					ZAT10/zat10 #2	28	222.134
																					ZAT10/zat10 #2	28	250.758
																					ZAT10/zat10 #2	28	194.715
																					ZAT10/zat10 #2	28	165.237
																					ZAT10/zat10 #2	28	186.407
																					ZAT10/zat10 #2	28	202.746
																					ZAT10/zat10 #2	28	168.386
																					ZAT10/zat10 #2	28	245.673
																					ZAT10/zat10 #2	28	276.52
																					ZAT10/zat10 #2	28	251.142
																					ZAT10/zat10 #2	28	209.369
																					ZAT10/zat10 #2	28	230.728
																					ZAT10/zat10 #2	28	244.855
																					ZAT10/zat10 #2	28	147.003
																					ZAT10/zat10 #2	28	143.465
																					ZAT10/zat10 #2	28	149.635
																					ZAT10/zat10 #2	28	233.726
																					ZAT10/zat10 #2	28	214.479
																					ZAT10/zat10 #2	28	191.928
																					ZAT10/zat10 #2	28	161.002
																					ZAT10/zat10 #2	28	179.446
																					ZAT10/zat10 #2	28	211.838
																					ZAT10/zat10 #2	28	198.391
																					ZAT10/zat10 #2	28	168.53
																					ZAT10/zat10 #2	28	197.611
																					ZAT10/zat10 #2	28	224.285
																					ZAT10/zat10 #2	28	240.905
																					ZAT10/zat10 #2	28	153.883
																					ZAT10/zat10 #2	28	162.765
																					ZAT10/zat10 #2	28	201.834
																					ZAT10/zat10 #2	28	149.022
																					ZAT10/zat10 #2	28	186.038
																					ZAT10/zat10 #2	28	192.189
																					ZAT10/zat10 #2	28	210.544
																					ZAT10/zat10 #2	28	158.514
																					ZAT10/zat10 #2	28	272.355
																					ZAT10/zat10 #2	28	144.515
																					ZAT10/zat10 #2	28	270.982
																					ZAT10/zat10 #2	28	206.542
																					ZAT10/zat10 #2	28	159.016
																					ZAT10/zat10 #2	28	119.907
																					ZAT10/zat10 #2	28	156.261
																					ZAT10/zat10 #2	28	142.086
																					ZAT10/zat10 #2	28	175.298
																					ZAT10/zat10 #2	28	191.338
																					ZAT10/zat10 #2	28	139.61
																					ZAT10/zat10 #2	28	236.944
																					ZAT10/zat10 #2	28	184.985
																					ZAT10/zat10 #2	28	337.065
																					ZAT10/zat10 #2	28	214.992
																					ZAT10/zat10 #2	28	246.46
																					ZAT10/zat10 #2	28	184.134
																					ZAT10/zat10 #2	28	160.387
																					ZAT10/zat10 #2	28	240.001
																					ZAT10/zat10 #2	28	243.491
																					ZAT10/zat10 #2	28	253.605
																					ZAT10/zat10 #2	28	199.997
																					ZAT10/zat10 #2	28	385.881
																					ZAT10/zat10 #2	28	299.224
																					ZAT10/zat10 #2	28	214.735
																					ZAT10/zat10 #2	28	218.009
																					ZAT10/zat10 #2	28	229.161
																					One-way ANOVA
																					Comparison	Df	F value	p-value
																					Genotype	9	16.68	< 2 E-16
																					Residuals	1396
																						Tukey's multiple comparisons test
																						Comparison	p-value
																						Col-0 28℃ vs Col-0 22℃	8.93084e-07
																						kcs1/2/20 28℃ vs Col-0 22℃	0.976676
																						ZAT10/zat10 #1 28℃ vs Col-0 22℃	8.42063e-05
																						ZAT10/zat10 #2 28℃ vs Col-0 22℃	0.357032
																						zat10 28℃ vs Col-0 22℃	1
																						kcs1/2/20 28℃ vs Col-0 28℃	1.15504e-09
																						ZAT10/zat10 #1 28℃ vs Col-0 28℃	0.644581
																						ZAT10/zat10 #2 28℃ vs Col-0 28℃	0.000303787
																						zat10 28℃ vs Col-0 28℃	3.44529e-07
																						ZAT10/zat10 #1 22℃ vs kcs1/2/20 22℃	0.799512
																						ZAT10/zat10 #2 22℃ vs kcs1/2/20 22℃	0.988432
																						zat10 22℃ vs kcs1/2/20 22℃	0.999651
																						ZAT10/zat10 #1 22℃ vs kcs1/2/20 28℃	0.945222
																						ZAT10/zat10 #2 22℃ vs kcs1/2/20 28℃	0.999721
																						zat10 22℃ vs kcs1/2/20 28℃	1
																						ZAT10/zat10 #1 28℃ vs ZAT10/zat10 #1 22℃	1.89169e-07
																						ZAT10/zat10 #2 28℃ vs ZAT10/zat10 #1 22℃	0.0989573
																						zat10 28℃ vs ZAT10/zat10 #1 22℃	1
																						ZAT10/zat10 #2 28℃ vs ZAT10/zat10 #1 28℃	0.0273122
																						zat10 28℃ vs ZAT10/zat10 #1 28℃	3.19966e-05
																						zat10 22℃ vs ZAT10/zat10 #2 22℃	0.999994
																						zat10 22℃ vs ZAT10/zat10 #2 28℃	0.00191244
																						zat10 28℃ vs zat10 22℃	0.997765
																						kcs1/2/20 22℃ vs Col-0 22℃	0.893474
																						ZAT10/zat10 #1 22℃ vs Col-0 22℃	1
																						ZAT10/zat10 #2 22℃ vs Col-0 22℃	0.99889
																						zat10 22℃ vs Col-0 22℃	0.990463
																						kcs1/2/20 22℃ vs Col-0 28℃	4.22549e-10
																						ZAT10/zat10 #1 22℃ vs Col-0 28℃	4.76644e-09
																						ZAT10/zat10 #2 22℃ vs Col-0 28℃	1.11755e-12
																						zat10 22℃ vs Col-0 28℃	1.85085e-11
																						kcs1/2/20 28℃ vs kcs1/2/20 22℃	0.999998
																						ZAT10/zat10 #1 28℃ vs kcs1/2/20 22℃	3.1595e-08
																						ZAT10/zat10 #2 28℃ vs kcs1/2/20 22℃	0.00310377
																						zat10 28℃ vs kcs1/2/20 22℃	0.943727
																						ZAT10/zat10 #1 28℃ vs kcs1/2/20 28℃	8.45943e-08
																						ZAT10/zat10 #2 28℃ vs kcs1/2/20 28℃	0.00856911
																						zat10 28℃ vs kcs1/2/20 28℃	0.991714
																						ZAT10/zat10 #2 22℃ vs ZAT10/zat10 #1 22℃	0.993941
																						zat10 22℃ vs ZAT10/zat10 #1 22℃	0.967997
																						ZAT10/zat10 #2 22℃ vs ZAT10/zat10 #1 28℃	2.77245e-12
																						zat10 22℃ vs ZAT10/zat10 #1 28℃	3.9673e-10
																						ZAT10/zat10 #2 28℃ vs ZAT10/zat10 #2 22℃	0.000690786
																						zat10 28℃ vs ZAT10/zat10 #2 22℃	0.999902
																						zat10 28℃ vs ZAT10/zat10 #2 28℃	0.243404

## Sheet: Fig. 4
Fig. 4b Reverse transcription-quantitative polymerase chain reaction (RT-qPCR)						Fig. 4c Primary root length					Fig. 4d Cortex cell length in the Maturation zone
Gene	Genotype	temperature	Relative Expression			Genotype	temperature	length			Genotype	temperature	length
MYC2	Col-0	22	0.256836			Col-0	22	4.853			Col-0	22	161.497
MYC2	Col-0	22	0.202391			Col-0	22	5.685			Col-0	22	177.6
MYC2	Col-0	22	0.315354			Col-0	22	5.234			Col-0	22	252.387
MYC2	Col-0	22	0.299959			Col-0	22	4.332			Col-0	22	180.287
MYC2	Col-0	28	0.344903			Col-0	22	5.689			Col-0	22	173.079
MYC2	Col-0	28	0.34027			Col-0	22	5.028			Col-0	22	172.279
MYC2	Col-0	28	0.320274			Col-0	22	3.896			Col-0	22	199.099
MYC2	Col-0	28	0.381385			Col-0	22	5.172			Col-0	22	163.05
MYC2	kcs1/2/20	22	0.0254912			Col-0	22	4.951			Col-0	22	185.004
MYC2	kcs1/2/20	22	0.0310275			Col-0	22	5.187			Col-0	22	200.969
MYC2	kcs1/2/20	22	0.0303075			Col-0	22	5.026			Col-0	22	154.493
MYC2	kcs1/2/20	22	0.0369081			Col-0	22	4.632			Col-0	22	167.846
MYC2	kcs1/2/20	28	0.0299754			Col-0	22	4.513			Col-0	22	148.247
MYC2	kcs1/2/20	28	0.0217895			Col-0	22	4.634			Col-0	22	149.492
MYC2	kcs1/2/20	28	0.0243078			Col-0	22	4.76			Col-0	22	186.332
MYC2	kcs1/2/20	28	0.0413948			Col-0	22	4.848			Col-0	22	190.218
MYC2	zat10	22	0.225842			Col-0	22	5.054			Col-0	22	196.079
MYC2	zat10	22	0.201079			Col-0	22	5.173			Col-0	22	158.567
MYC2	zat10	22	0.244677			Col-0	22	3.549			Col-0	22	192.473
MYC2	zat10	22	0.245646			Col-0	22	4.248			Col-0	22	174.711
MYC2	zat10	28	0.231052			Col-0	22	5.231			Col-0	22	140.647
MYC2	zat10	28	0.212762			Col-0	22	4.884			Col-0	22	171.789
MYC2	zat10	28	0.223895			Col-0	22	4.962			Col-0	22	144.919
MYC2	zat10	28	0.215423			Col-0	22	4.92			Col-0	22	188.101
MYC2	ZAT10/zat10 #4	22	0.282915			Col-0	28	6.331			Col-0	22	182.041
MYC2	ZAT10/zat10 #4	22	0.249078			Col-0	28	6.462			Col-0	22	156.924
MYC2	ZAT10/zat10 #4	22	0.178351			Col-0	28	7.723			Col-0	22	178.483
MYC2	ZAT10/zat10 #4	22	0.24628			Col-0	28	6.812			Col-0	22	289.561
MYC2	ZAT10/zat10 #4	28	0.392929			Col-0	28	6.606			Col-0	22	190.045
MYC2	ZAT10/zat10 #4	28	0.252813			Col-0	28	6.61			Col-0	22	250.187
MYC2	ZAT10/zat10 #4	28	0.303331			Col-0	28	6.875			Col-0	22	237.57
MYC2	ZAT10/zat10 #4	28	0.255553			Col-0	28	6.664			Col-0	22	246.691
MYC2	ZAT10/zat10 #5	22	0.340917			Col-0	28	6.87			Col-0	22	222.749
MYC2	ZAT10/zat10 #5	22	0.193359			Col-0	28	6.967			Col-0	22	257.935
MYC2	ZAT10/zat10 #5	22	0.214108			Col-0	28	6.59			Col-0	22	181.957
MYC2	ZAT10/zat10 #5	22	0.244072			Col-0	28	7.25			Col-0	22	209.864
MYC2	ZAT10/zat10 #5	28	0.289766			Col-0	28	6.003			Col-0	22	119.243
MYC2	ZAT10/zat10 #5	28	0.306237			Col-0	28	5.419			Col-0	22	158.098
MYC2	ZAT10/zat10 #5	28	0.332526			Col-0	28	5.683			Col-0	22	264.685
MYC2	ZAT10/zat10 #5	28	0.289659			Col-0	28	6.189			Col-0	22	223.309
						Col-0	28	6.168			Col-0	22	213.615
						Col-0	28	7.049			Col-0	22	261.764
Two-way ANOVA						Col-0	28	6.282			Col-0	22	170.085
MYC2						Col-0	28	6.078			Col-0	22	142.249
Comparison	Factor	Df	F value	adj-pvalue		myc2-1	22	6.067			Col-0	22	151.989
Col-0 vs kcs1/2/20	temperature	1	1.584	0.23217		myc2-1	22	5.148			Col-0	22	159.456
	Sample.Name	1	14.259	0.00264		myc2-1	22	4.966			Col-0	22	177.531
	temperature × Sample.Name	1	11.767	0.00498		myc2-1	22	3.94			Col-0	22	242.984
	Residuals	12	—	—		myc2-1	22	5.314			Col-0	22	265.711
Col-0 vs zat10	temperature	1	2.535	0.13539		myc2-1	22	6.056			Col-0	22	237.218
	Sample.Name	1	14.077	0.00242		myc2-1	22	4.41			Col-0	22	179.413
	temperature × Sample.Name	1	5.455	0.03618		myc2-1	22	5.033			Col-0	22	174.235
	Residuals	13	—	—		myc2-1	22	6.298			Col-0	22	144.194
Col-0 vs ZAT10/zat10 #4	temperature	1	8.337	0.0136		myc2-1	22	5.697			Col-0	22	179.036
	Sample.Name	1	2.392	0.1479		myc2-1	22	5.306			Col-0	22	187.227
	temperature × Sample.Name	1	0.11	0.7461		myc2-1	22	5.212			Col-0	22	153.607
	Residuals	12	—	—		myc2-1	22	4.668			Col-0	22	151.726
Col-0 vs ZAT10/zat10 #5	temperature	1	9.181	0.0105		myc2-1	22	5.546			Col-0	22	146.242
	Sample.Name	1	1.994	0.1833		myc2-1	22	5.7			Col-0	22	190.631
	temperature × Sample.Name	1	0.238	0.6347		myc2-1	22	4.061			Col-0	22	178.332
	Residuals	12	—	—		myc2-1	22	5.783			Col-0	22	198.698
						myc2-1	22	4.869			Col-0	22	252.474
						myc2-1	22	5.649			Col-0	22	151.637
						myc2-1	22	5.833			Col-0	22	166.919
						myc2-1	22	5.668			Col-0	22	284.008
						myc2-1	22	5.804			Col-0	22	277.761
						myc2-1	22	5.71			Col-0	22	209.284
						myc2-1	22	5.696			Col-0	22	239.669
						myc2-1	22	3.762			Col-0	22	255.575
						myc2-1	22	3.755			Col-0	22	190.33
						myc2-1	22	4.356			Col-0	22	226.291
						myc2-1	22	3.935			Col-0	22	276.323
						myc2-1	22	3.337			Col-0	22	144.453
						myc2-1	22	4.37			Col-0	22	158.396
						myc2-1	22	4.185			Col-0	22	164.367
						myc2-1	22	3.506			Col-0	22	213.247
						myc2-1	22	3.934			Col-0	22	250.515
						myc2-1	22	5.517			Col-0	22	209.851
						myc2-1	22	5.062			Col-0	22	229.378
						myc2-1	22	4.938			Col-0	22	210.612
						myc2-1	22	4.847			Col-0	22	240.642
						myc2-1	22	3.685			Col-0	22	222.537
						myc2-1	22	4.692			Col-0	22	199.709
						myc2-1	22	4.645			Col-0	22	263.21
						myc2-1	22	4.514			Col-0	22	150.007
						myc2-1	22	3.182			Col-0	22	171.579
						myc2-1	22	4.413			Col-0	22	167.152
						myc2-1	22	4.906			Col-0	22	206.134
						myc2-1	22	3.644			Col-0	22	171.197
						myc2-1	22	5.21			Col-0	22	138.656
						myc2-1	22	4.965			Col-0	22	177.783
						myc2-1	22	3.38			Col-0	22	250.831
						myc2-1	28	6.37			Col-0	22	138.91
						myc2-1	28	6.206			Col-0	22	198.988
						myc2-1	28	4.786			Col-0	22	233.658
						myc2-1	28	6.409			Col-0	22	202.874
						myc2-1	28	6.788			Col-0	22	184.057
						myc2-1	28	6.886			Col-0	22	225.271
						myc2-1	28	6.046			Col-0	22	276.095
						myc2-1	28	5.638			Col-0	22	193.757
						myc2-1	28	7.665			Col-0	22	249.487
						myc2-1	28	5.03			Col-0	22	146.137
						myc2-1	28	4.408			Col-0	22	175.579
						myc2-1	28	6.748			Col-0	22	173.796
						myc2-1	28	6.204			Col-0	22	212.49
						myc2-1	28	6.024			Col-0	22	158.931
						myc2-1	28	6.633			Col-0	22	189.506
						myc2-1	28	5.824			Col-0	22	146.766
						myc2-1	28	4.783			Col-0	22	183.908
						myc2-1	28	4.566			Col-0	22	156.233
						myc2-1	28	6.115			Col-0	22	192.874
						myc2-1	28	6.331			Col-0	22	198.199
						myc2-1	28	4.079			Col-0	22	199.439
						myc2-1	28	5.695			Col-0	22	147.214
						myc2-1	28	3.72			Col-0	22	208.553
						myc2-1	28	6.04			Col-0	22	156.627
						myc2-1	28	5.736			Col-0	22	242.455
						myc2-1	28	6.031			Col-0	22	210.12
						myc2-1	28	6.491			Col-0	22	289.535
						myc2-1	28	5.205			Col-0	22	171.475
						myc2-1	28	5.464			Col-0	22	227.958
						myc2-1	28	6.478			Col-0	22	216.024
						myc2-1	28	5.678			Col-0	22	149.342
						myc2-1	28	6.142			Col-0	22	159.043
						myc2-1	28	6.674			Col-0	22	207.968
						myc2-1	28	6.093			Col-0	22	166.353
						myc2-1	28	6.065			Col-0	22	165.004
						myc2-1	28	6.063			Col-0	22	217.581
						myc2-1	28	6.599			Col-0	22	237.447
						myc2-1	28	6.591			Col-0	22	274.453
						jin1-2	22	4.85			Col-0	22	208.832
						jin1-2	22	3.826			Col-0	22	218.349
						jin1-2	22	4.824			Col-0	22	129.123
						jin1-2	22	5.096			Col-0	22	161.686
						jin1-2	22	4.014			Col-0	22	131.704
						jin1-2	22	4.456			Col-0	22	253.023
						jin1-2	22	5.09			Col-0	22	172.409
						jin1-2	22	4.711			Col-0	22	165.996
						jin1-2	22	4.219			Col-0	22	211.472
						jin1-2	22	4.404			Col-0	22	128.612
						jin1-2	22	4.032			Col-0	22	185.838
						jin1-2	22	4.774			Col-0	22	205.117
						jin1-2	22	4.621			Col-0	22	198.873
						jin1-2	22	4.208			Col-0	22	215.148
						jin1-2	22	4.849			Col-0	22	202.671
						jin1-2	22	4.037			Col-0	22	209.453
						jin1-2	22	3.843			Col-0	22	237.873
						jin1-2	22	4.555			Col-0	22	281.75
						jin1-2	22	5.003			Col-0	22	167.161
						jin1-2	22	4.44			Col-0	22	152.458
						jin1-2	28	4.888			Col-0	22	164.864
						jin1-2	28	6.037			Col-0	22	178.996
						jin1-2	28	4.456			Col-0	22	138.439
						jin1-2	28	6.083			Col-0	22	194.097
						jin1-2	28	4.73			Col-0	22	185.048
						jin1-2	28	5.396			Col-0	22	200.873
						jin1-2	28	5.178			Col-0	22	185.97
						jin1-2	28	4.154			Col-0	22	260.16
						jin1-2	28	5.21			Col-0	22	227.423
						jin1-2	28	4.196			Col-0	22	208.935
						jin1-2	28	5.618			Col-0	22	212.424
						jin1-2	28	5.259			Col-0	22	205.848
						jin1-2	28	5.511			Col-0	22	247.512
						jin1-2	28	3.879			Col-0	22	214.355
											Col-0	22	215.117
						One-way ANOVA					Col-0	22	177.031
						Comparison	Df	F value	p-value		Col-0	22	231.032
						Genotype	5	29.65	< 2 E-16		Col-0	22	217.049
						Residuals	158				Col-0	22	175.692
											Col-0	22	250.298
							Tukey's multiple comparisons test				Col-0	22	143.883
							Comparison	p-value			Col-0	22	141.729
							Col-0 28℃-Col-0 22℃	8.77809e-12			Col-0	22	228.223
							myc2 22℃-Col-0 22	0.999948			Col-0	22	228.456
							jin1-2 28-Col-0 28	1.49695e-07			Col-0	22	147.364
							jin1-2 28-jin1-2 22	0.227884			Col-0	22	192.161
							myc2 22℃-jin1-2 28	0.898048			Col-0	22	156.574
							jin1-2 22℃-Col-0 22℃	5.44649			Col-0	22	129.452
							myc2 28℃-Col-0 22℃	8.33916			Col-0	22	133.726
							myc2 22℃-Col-0 28℃	0.768274			Col-0	22	107.087
							myc2 22℃-jin1-2 22℃	5.19733			Col-0	22	168.652
							myc2 28℃-jin1-2 28	1.96612			Col-0	22	140.921
							jin1-2 28-Col-0 22℃	9.67159			Col-0	22	145.493
							jin1-2 22℃-Col-0 28℃	0.768274			Col-0	22	173.073
							myc2 28℃-Col-0 28℃	1.88716			Col-0	22	179.05
							myc2 28℃-jin1-2 22℃	0.29434			Col-0	22	244.76
							myc2 28℃-myc2 22℃	0.643037			Col-0	22	229.446
											Col-0	22	181.403
											Col-0	22	235.48
											Col-0	22	243.14
											Col-0	22	242.957
											Col-0	22	178.145
											Col-0	22	168.286
											Col-0	22	146.421
											Col-0	22	147.752
											Col-0	22	168.453
											Col-0	22	99.232
											Col-0	22	225.179
											Col-0	22	211.591
											Col-0	28	264.738
											Col-0	28	215.889
											Col-0	28	188.521
											Col-0	28	239.593
											Col-0	28	235.754
											Col-0	28	139.468
											Col-0	28	230.928
											Col-0	28	208.016
											Col-0	28	229.981
											Col-0	28	180.582
											Col-0	28	160.522
											Col-0	28	235.889
											Col-0	28	262.322
											Col-0	28	139.739
											Col-0	28	287.208
											Col-0	28	146.088
											Col-0	28	135.457
											Col-0	28	203.227
											Col-0	28	160.969
											Col-0	28	194.336
											Col-0	28	149.643
											Col-0	28	147.743
											Col-0	28	142.345
											Col-0	28	170.259
											Col-0	28	237.724
											Col-0	28	201.565
											Col-0	28	306.316
											Col-0	28	150.958
											Col-0	28	227.183
											Col-0	28	175.297
											Col-0	28	171.329
											Col-0	28	303.451
											Col-0	28	210.227
											Col-0	28	273.653
											Col-0	28	167.14
											Col-0	28	234.45
											Col-0	28	241.917
											Col-0	28	192.383
											Col-0	28	310.016
											Col-0	28	189.483
											Col-0	28	213.86
											Col-0	28	219.373
											Col-0	28	199.799
											Col-0	28	237.969
											Col-0	28	302.418
											Col-0	28	275.205
											Col-0	28	229.399
											Col-0	28	196.064
											Col-0	28	268.353
											Col-0	28	196.347
											Col-0	28	235.167
											Col-0	28	204.475
											Col-0	28	258.013
											Col-0	28	247.352
											Col-0	28	227.876
											Col-0	28	358.784
											Col-0	28	211.761
											Col-0	28	216.344
											Col-0	28	191.075
											Col-0	28	304.346
											Col-0	28	193.89
											Col-0	28	252.428
											Col-0	28	248.47
											Col-0	28	220.962
											Col-0	28	160.894
											Col-0	28	135.705
											Col-0	28	264.516
											Col-0	28	222.345
											Col-0	28	137.03
											Col-0	28	239.703
											Col-0	28	165.008
											Col-0	28	226.52
											Col-0	28	181.04
											Col-0	28	186.36
											Col-0	28	205.058
											Col-0	28	188.813
											Col-0	28	214.029
											Col-0	28	250.077
											Col-0	28	164.669
											Col-0	28	320.668
											Col-0	28	193.432
											Col-0	28	210.206
											Col-0	28	224.315
											Col-0	28	206.035
											Col-0	28	182.206
											Col-0	28	174.518
											Col-0	28	255.553
											Col-0	28	220.485
											Col-0	28	167.215
											Col-0	28	228.328
											Col-0	28	258.075
											Col-0	28	272.175
											Col-0	28	214.229
											Col-0	28	174.358
											Col-0	28	234.19
											Col-0	28	228.482
											Col-0	28	211.202
											Col-0	28	184.353
											Col-0	28	324.605
											Col-0	28	209.707
											Col-0	28	296.432
											Col-0	28	161.578
											Col-0	28	274.828
											Col-0	28	156.242
											Col-0	28	325.185
											Col-0	28	247.139
											Col-0	28	248.621
											Col-0	28	196.254
											Col-0	28	225.876
											Col-0	28	356.971
											Col-0	28	247.929
											Col-0	28	151.444
											Col-0	28	234.13
											Col-0	28	215.812
											Col-0	28	152.568
											Col-0	28	178.707
											Col-0	28	213.849
											Col-0	28	193.24
											Col-0	28	221.012
											Col-0	28	157.527
											Col-0	28	198.368
											Col-0	28	226.095
											Col-0	28	192.228
											Col-0	28	245.397
											Col-0	28	261.605
											Col-0	28	210.051
											Col-0	28	261.346
											Col-0	28	303.833
											Col-0	28	310.481
											Col-0	28	180.309
											Col-0	28	276.91
											Col-0	28	168.335
											Col-0	28	164.414
											Col-0	28	279.761
											Col-0	28	264.458
											Col-0	28	281.197
											Col-0	28	204.226
											Col-0	28	197.057
											Col-0	28	218.367
											Col-0	28	221.865
											Col-0	28	167.118
											Col-0	28	145.718
											Col-0	28	280.466
											Col-0	28	284.336
											Col-0	28	197.881
											Col-0	28	190.758
											Col-0	28	292.394
											Col-0	28	232.058
											Col-0	28	188.408
											Col-0	28	202.278
											Col-0	28	204.267
											Col-0	28	200.54
											Col-0	28	203.744
											Col-0	28	209.777
											Col-0	28	196.634
											Col-0	28	243.69
											Col-0	28	202.886
											Col-0	28	231.204
											Col-0	28	306.334
											Col-0	28	325.919
											Col-0	28	211.166
											Col-0	28	241.007
											Col-0	28	321.811
											Col-0	28	248.415
											Col-0	28	288.461
											Col-0	28	190.954
											Col-0	28	229.359
											Col-0	28	219.153
											Col-0	28	199.69
											Col-0	28	172.254
											Col-0	28	139.025
											Col-0	28	118.479
											Col-0	28	267.094
											Col-0	28	227.194
											Col-0	28	227.899
											Col-0	28	256.69
											Col-0	28	253.904
											Col-0	28	232.327
											Col-0	28	233.432
											Col-0	28	287.431
											Col-0	28	225.7
											Col-0	28	291.533
											Col-0	28	151.597
											Col-0	28	227.086
											Col-0	28	239.396
											Col-0	28	224.734
											Col-0	28	309.512
											myc2-1	22	194.376
											myc2-1	22	200.321
											myc2-1	22	243.209
											myc2-1	22	182.463
											myc2-1	22	204.93
											myc2-1	22	204.14
											myc2-1	22	217.33
											myc2-1	22	276.771
											myc2-1	22	247.72
											myc2-1	22	175.115
											myc2-1	22	265.399
											myc2-1	22	200.556
											myc2-1	22	242.578
											myc2-1	22	309.563
											myc2-1	22	217.659
											myc2-1	22	220.245
											myc2-1	22	229.676
											myc2-1	22	186.023
											myc2-1	22	218.619
											myc2-1	22	221.22
											myc2-1	22	262.851
											myc2-1	22	150.449
											myc2-1	22	172.883
											myc2-1	22	187.919
											myc2-1	22	156.692
											myc2-1	22	175.974
											myc2-1	22	259.534
											myc2-1	22	265.371
											myc2-1	22	299.86
											myc2-1	22	166.784
											myc2-1	22	206.556
											myc2-1	22	259.307
											myc2-1	22	243.917
											myc2-1	22	275.33
											myc2-1	22	219.498
											myc2-1	22	236.821
											myc2-1	22	174.221
											myc2-1	22	184.628
											myc2-1	22	207.794
											myc2-1	22	242.028
											myc2-1	22	250.072
											myc2-1	22	236.504
											myc2-1	22	185.349
											myc2-1	22	255.491
											myc2-1	22	179.386
											myc2-1	22	207.666
											myc2-1	22	120.754
											myc2-1	22	131.023
											myc2-1	22	246.077
											myc2-1	22	258.463
											myc2-1	22	174.857
											myc2-1	22	161.931
											myc2-1	22	141.318
											myc2-1	22	170.87
											myc2-1	22	167.396
											myc2-1	22	208.656
											myc2-1	22	191.693
											myc2-1	22	252.186
											myc2-1	22	189.003
											myc2-1	22	230.996
											myc2-1	22	206.654
											myc2-1	22	236.734
											myc2-1	28	212.405
											myc2-1	28	276.431
											myc2-1	28	188.827
											myc2-1	28	222.576
											myc2-1	28	239.711
											myc2-1	28	340.286
											myc2-1	28	179.684
											myc2-1	28	226.781
											myc2-1	28	150.966
											myc2-1	28	166.416
											myc2-1	28	243.245
											myc2-1	28	144.201
											myc2-1	28	202.819
											myc2-1	28	183.96
											myc2-1	28	226.783
											myc2-1	28	274.384
											myc2-1	28	175.545
											myc2-1	28	187.073
											myc2-1	28	225.351
											myc2-1	28	196.648
											myc2-1	28	214.893
											myc2-1	28	246.946
											myc2-1	28	291.298
											myc2-1	28	271.996
											myc2-1	28	186.338
											myc2-1	28	131.261
											myc2-1	28	187.794
											myc2-1	28	174.367
											myc2-1	28	189.149
											myc2-1	28	191.288
											myc2-1	28	262.261
											myc2-1	28	279.327
											myc2-1	28	189.831
											myc2-1	28	198.133
											myc2-1	28	219.973
											myc2-1	28	244.17
											myc2-1	28	216.676
											myc2-1	28	123.89
											myc2-1	28	197.268
											myc2-1	28	247.396
											myc2-1	28	160.297
											myc2-1	28	167.755
											myc2-1	28	284.707
											myc2-1	28	167.677
											myc2-1	28	123.354
											myc2-1	28	138.071
											myc2-1	28	161.019
											myc2-1	28	303.421
											myc2-1	28	190.899
											myc2-1	28	207.509
											myc2-1	28	216.506
											myc2-2	22	238.026
											myc2-2	22	169.467
											myc2-2	22	153.951
											myc2-2	22	195.486
											myc2-2	22	224.265
											myc2-2	22	140.528
											myc2-2	22	160.714
											myc2-2	22	152.735
											myc2-2	22	272.868
											myc2-2	22	241.228
											myc2-2	22	156.951
											myc2-2	22	194.049
											myc2-2	22	275.802
											myc2-2	22	159.987
											myc2-2	22	129.751
											myc2-2	22	167.85
											myc2-2	22	183.041
											myc2-2	22	161.256
											myc2-2	22	157.071
											myc2-2	22	175.298
											myc2-2	22	171.386
											myc2-2	22	200.03
											myc2-2	22	152.44
											myc2-2	22	191.322
											myc2-2	22	195.052
											myc2-2	22	188.858
											myc2-2	22	241.191
											myc2-2	22	251.379
											myc2-2	22	197.455
											myc2-2	22	208.376
											myc2-2	22	252.922
											myc2-2	22	307.106
											myc2-2	22	253.762
											myc2-2	22	151.416
											myc2-2	22	198.368
											myc2-2	22	207.478
											myc2-2	22	206.129
											myc2-2	22	222.981
											myc2-2	22	274.25
											myc2-2	22	263.755
											myc2-2	22	218.818
											myc2-2	22	242.54
											myc2-2	22	221.776
											myc2-2	22	264.876
											myc2-2	22	219.275
											myc2-2	22	239.698
											myc2-2	22	184.376
											myc2-2	22	222.217
											myc2-2	22	227.051
											myc2-2	22	250.829
											myc2-2	22	192.462
											myc2-2	22	179.951
											myc2-2	22	180.655
											myc2-2	22	225.264
											myc2-2	22	198.758
											myc2-2	22	207.162
											myc2-2	22	207.233
											myc2-2	22	267.312
											myc2-2	22	175.52
											myc2-2	22	151.723
											myc2-2	22	193.316
											myc2-2	22	168.261
											myc2-2	22	261.751
											myc2-2	22	189.428
											myc2-2	22	146.294
											myc2-2	22	178.294
											myc2-2	22	208.244
											myc2-2	22	175.397
											myc2-2	22	229.405
											myc2-2	22	232.413
											myc2-2	22	223.232
											myc2-2	22	168.622
											myc2-2	22	155.828
											myc2-2	22	162.816
											myc2-2	22	153.583
											myc2-2	22	229.937
											myc2-2	22	131.563
											myc2-2	22	221.694
											myc2-2	22	196.782
											myc2-2	22	174.912
											myc2-2	22	145.884
											myc2-2	22	204.957
											myc2-2	22	159.717
											myc2-2	22	176.408
											myc2-2	22	178.227
											myc2-2	22	200.564
											myc2-2	22	196.976
											myc2-2	22	248.806
											myc2-2	22	198.623
											myc2-2	22	188.626
											myc2-2	22	210.25
											myc2-2	22	232.273
											myc2-2	22	257.919
											myc2-2	22	278.022
											myc2-2	22	198.666
											myc2-2	22	232.682
											myc2-2	22	133.585
											myc2-2	22	196.565
											myc2-2	22	291.163
											myc2-2	22	167.339
											myc2-2	22	162.751
											myc2-2	22	210.316
											myc2-2	22	176.568
											myc2-2	22	187.218
											myc2-2	22	303.368
											myc2-2	22	208.776
											myc2-2	22	228.556
											myc2-2	22	179.371
											myc2-2	22	200.953
											myc2-2	22	230.587
											myc2-2	22	242.401
											myc2-2	22	240.787
											myc2-2	22	171.446
											myc2-2	22	147.192
											myc2-2	22	168.763
											myc2-2	22	173.325
											myc2-2	22	195.019
											myc2-2	22	275.055
											myc2-2	22	159.607
											myc2-2	22	253.836
											myc2-2	22	212.518
											myc2-2	22	203.258
											myc2-2	22	190.113
											myc2-2	22	248.5
											myc2-2	22	143.089
											myc2-2	22	136.332
											myc2-2	22	191.7
											myc2-2	22	185.833
											myc2-2	22	188.477
											myc2-2	22	158.632
											myc2-2	22	232.061
											myc2-2	22	147.179
											myc2-2	22	166.19
											myc2-2	22	150.108
											myc2-2	28	252.402
											myc2-2	28	254.499
											myc2-2	28	175.148
											myc2-2	28	261.281
											myc2-2	28	191.713
											myc2-2	28	253.388
											myc2-2	28	279.806
											myc2-2	28	172.212
											myc2-2	28	197.363
											myc2-2	28	195.562
											myc2-2	28	178.36
											myc2-2	28	257.536
											myc2-2	28	171.05
											myc2-2	28	182.413
											myc2-2	28	175.868
											myc2-2	28	181.552
											myc2-2	28	246.429
											myc2-2	28	272.801
											myc2-2	28	237.784
											myc2-2	28	131.506
											myc2-2	28	211.455
											myc2-2	28	175.52
											myc2-2	28	268.229
											myc2-2	28	268.303
											myc2-2	28	246.642
											myc2-2	28	246.358
											myc2-2	28	165.652
											myc2-2	28	226.555
											myc2-2	28	225.952
											myc2-2	28	200.027
											myc2-2	28	183.985
											myc2-2	28	179.428
											myc2-2	28	169.628
											myc2-2	28	184.011
											myc2-2	28	162.832
											myc2-2	28	232.976
											myc2-2	28	153.604
											myc2-2	28	210.229
											myc2-2	28	178.257
											myc2-2	28	272.789
											myc2-2	28	244.331
											myc2-2	28	162.624
											myc2-2	28	144.414
											myc2-2	28	142.859
											myc2-2	28	198.147
											myc2-2	28	254.85
											myc2-2	28	258.043
											myc2-2	28	215.653
											myc2-2	28	315.742
											myc2-2	28	197.404
											myc2-2	28	219.457
											myc2-2	28	200.397
											myc2-2	28	181.61
											myc2-2	28	203.202
											myc2-2	28	259.64
											myc2-2	28	174.898
											myc2-2	28	216.046
											myc2-2	28	206.273
											myc2-2	28	193.104
											myc2-2	28	257.092
											myc2-2	28	208.775
											myc2-2	28	212.731
											myc2-2	28	188.931
											myc2-2	28	207.652
											myc2-2	28	236.793
											myc2-2	28	276.48
											myc2-2	28	219.242
											myc2-2	28	165.972
											myc2-2	28	218.379
											myc2-2	28	188.699
											myc2-2	28	171.657
											myc2-2	28	305.195
											myc2-2	28	163.238
											myc2-2	28	212.522
											myc2-2	28	136.934
											myc2-2	28	165.187
											myc2-2	28	204.011
											myc2-2	28	263.491
											myc2-2	28	179.636
											myc2-2	28	215.333
											myc2-2	28	251.774
											myc2-2	28	175.587
											myc2-2	28	322.359
											myc2-2	28	193.011
											myc2-2	28	179.855
											myc2-2	28	273.849
											myc2-2	28	221.124
											myc2-2	28	257.253
											myc2-2	28	291.366
											myc2-2	28	179.483
											myc2-2	28	161.105
											myc2-2	28	194.284
											myc2-2	28	199.032
											myc2-2	28	173.427
											myc2-2	28	200.639
											myc2-2	28	165.712
											myc2-2	28	267.683
											myc2-2	28	173.292
											myc2-2	28	180.272
											myc2-2	28	175.811
											myc2-2	28	249.92
											myc2-2	28	250.104
											myc2-2	28	223.135
											myc2-2	28	309.967
											myc2-2	28	202.235
											myc2-2	28	189.043
											myc2-2	28	182.653
											myc2-2	28	185.767
											myc2-2	28	150.741
											myc2-2	28	215.674
											myc2-2	28	239.561
											myc2-2	28	215.538
											myc2-2	28	238.27
											myc2-2	28	184.084
											myc2-2	28	188.364
											myc2-2	28	143.949
											myc2-2	28	236.043
											myc2-2	28	198.387
											myc2-2	28	249.095
											One-way ANOVA
											Comparison	Df	F value	p-value
											kind_R	5	11.09	3.52 E-10
											Residuals	535
											Tukey's multiple comparisons test
											Comparison	p-value
											Col-0 28℃ vs Col-0 22℃	1.62e-09
											jin1-2 22℃ vs Col-0 22℃	0.921
											jin1-2 28℃ vs Col-0 22℃	0.0515
											myc2 22℃ vs Col-0 22℃	0.0684
											myc2 28℃ vs Col-0 22℃	0.363
											jin1-2 22℃ vs Col-0 28℃	7.53e-09
											jin1-2 28℃ vs Col-0 28℃	0.000327
											myc2 22℃ vs Col-0 28℃	0.0135
											myc2 28℃ vs Col-0 28℃	0.00292
											jin1-2 28℃ vs jin1-2 22℃	0.277
											myc2 22℃ vs jin1-2 22℃	0.294
											myc2 28℃ vs jin1-2 22℃	0.794
											myc2 22℃ vs jin1-2 28℃	0.999
											myc2 28℃ vs jin1-2 28℃	0.999
											myc2 28℃ vs myc2 22℃	0.992

## Sheet: Fig. 5
Fig. 5b Reverse transcription-quantitative polymerase chain reaction (RT-qPCR)
Gene	Genotype	temperature	Relative Expression			Two-way ANOVA
ZAT10	Col-0	22	1.07467			ZAT10
ZAT10	Col-0	22	1.44213			Comparison	Factor	Df	F value	adjusted p-value
ZAT10	Col-0	22	1.60983			Col-0 vs kcs1220	temperature	1	45.23	0.000149
ZAT10	Col-0	28	13.6746				genotype	1	12.95	0.006995
ZAT10	Col-0	28	21.5684				temperature × genotype	1	40.2	0.000223
ZAT10	Col-0	28	20.4523				Residuals	8	—	—
ZAT10	kcs1/2/20	22	6.10466			Col-0 vs zat10	temperature	1	48.32	0.000118
ZAT10	kcs1/2/20	22	4.01529				genotype	1	64.95	4.14e-05
ZAT10	kcs1/2/20	22	4.8281				temperature × genotype	1	48.43	0.000117
ZAT10	kcs1/2/20	28	4.83967				Residuals	8	—	—
ZAT10	kcs1/2/20	28	6.82398			Col-0 vs myc2	temperature	1	48.31	0.000118
ZAT10	kcs1/2/20	28	4.80222				genotype	1	34.7	0.000366
ZAT10	zat10	22	0.0193167				temperature × genotype	1	45.69	0.000144
ZAT10	zat10	22	0.0219685				Residuals	8	—	—
ZAT10	zat10	22	0.00777981			Col-0 vs jin1-2	temperature	1	48.83	0.000114
ZAT10	zat10	28	0.00909762				genotype	1	59.65	5.62e-05
ZAT10	zat10	28	0.00319874				temperature × genotype	1	47.84	0.000122
ZAT10	zat10	28	0.00877816				Residuals	8	—	—
ZAT10	myc2	22	2.41191			ACS6
ZAT10	myc2	22	2.96513			Comparison	Factor	Df	F value	adjusted p-value
ZAT10	myc2	22	2.01607			Col-0 vs kcs1220	temperature	1	13.14	0.00673
ZAT10	myc2	28	3.19415				genotype	1	18.86	0.00247
ZAT10	myc2	28	2.82443				temperature × genotype	1	22.64	0.00143
ZAT10	myc2	28	2.09428				Residuals	8	—	—
ZAT10	jin1-2	22	0.494126			Col-0 vs zat10	temperature	1	25.8	0.000954
ZAT10	jin1-2	22	0.243808				genotype	1	41.31	0.000203
ZAT10	jin1-2	22	0.396528				temperature × genotype	1	11.19	0.010145
ZAT10	jin1-2	28	0.482718				Residuals	8	—	—
ZAT10	jin1-2	28	0.432681			Col-0 vs myc2	temperature	1	9.63	0.0146
ZAT10	jin1-2	28	0.484316				genotype	1	2.3	0.1681
ACS6	Col-0	22	1.98616				temperature × genotype	1	11.07	0.0104
ACS6	Col-0	22	2.69055				Residuals	8	—	—
ACS6	Col-0	22	1.97098			Col-0 vs jin1-2	temperature	1	21.11	0.00177
ACS6	Col-0	28	3.70262				genotype	1	52.58	8.8e-05
ACS6	Col-0	28	5.10619				temperature × genotype	1	13.12	0.00676
ACS6	Col-0	28	5.44518				Residuals	8	—	—
ACS6	kcs1/2/20	22	2.25162			MKK9
ACS6	kcs1/2/20	22	2.42895			Comparison	Factor	Df	F value	adjusted p-value
ACS6	kcs1/2/20	22	2.34417			Col-0 vs kcs1220	temperature	1	12.253	0.00807
ACS6	kcs1/2/20	28	2.12724				genotype	1	9.426	0.01534
ACS6	kcs1/2/20	28	2.16833				temperature × genotype	1	16.507	0.00362
ACS6	kcs1/2/20	28	1.70085				Residuals	8	—	—
ACS6	zat10	22	1.31191			Col-0 vs zat10	temperature	1	17.141	0.00325
ACS6	zat10	22	1.31707				genotype	1	19.852	0.00212
ACS6	zat10	22	1.23665				temperature × genotype	1	7.025	0.02923
ACS6	zat10	28	1.52244				Residuals	8	—	—
ACS6	zat10	28	1.94822			Col-0 vs myc2	temperature	1	5.933	0.04084
ACS6	zat10	28	1.9601				genotype	1	2.675	0.14057
ACS6	myc2	22	3.45113				temperature × genotype	1	12.147	0.00826
ACS6	myc2	22	3.10121				Residuals	8	—	—
ACS6	myc2	22	2.23866			Col-0 vs jin1-2	temperature	1	13.5	0.006276
ACS6	myc2	28	2.77691				genotype	1	27.34	0.000794
ACS6	myc2	28	3.54544				temperature × genotype	1	12.43	0.007779
ACS6	myc2	28	2.20354				Residuals	8	—	—
ACS6	jin1-2	22	1.26405			STY46
ACS6	jin1-2	22	0.703142			Comparison	Factor	Df	F value	adjusted p-value
ACS6	jin1-2	22	1.32154			Col-0 vs kcs1220	temperature	1	27.36	0.000792
ACS6	jin1-2	28	1.33647				genotype	1	11.8	0.008878
ACS6	jin1-2	28	1.40712				temperature × genotype	1	15.4	0.004392
ACS6	jin1-2	28	1.4457				Residuals	8	—	—
MKK9	Col-0	22	1.15514			Col-0 vs zat10	temperature	1	0.081	0.78378
MKK9	Col-0	22	1.25728				genotype	1	5.869	0.041679
MKK9	Col-0	22	1.26381				temperature × genotype	1	27.891	0.000745
MKK9	Col-0	28	2.02251				Residuals	8	—	—
MKK9	Col-0	28	2.3416			Col-0 vs myc2	temperature	1	4.956	0.056625
MKK9	Col-0	28	3.14221				genotype	1	15.952	0.003983
MKK9	kcs1/2/20	22	1.36683				temperature × genotype	1	29.234	0.000641
MKK9	kcs1/2/20	22	1.35324				Residuals	8	—	—
MKK9	kcs1/2/20	22	1.4588			Col-0 vs jin1-2	temperature	1	77.76	2.15e-05
MKK9	kcs1/2/20	28	1.32414				genotype	1	9.708	0.01432
MKK9	kcs1/2/20	28	1.32556				temperature × genotype	1	23.159	0.00133
MKK9	kcs1/2/20	28	1.24439				Residuals	8	—	—
MKK9	zat10	22	0.958902
MKK9	zat10	22	0.894706
MKK9	zat10	22	0.804524
MKK9	zat10	28	0.839306
MKK9	zat10	28	1.36911
MKK9	zat10	28	1.28996
MKK9	myc2	22	1.98311
MKK9	myc2	22	1.7874
MKK9	myc2	22	1.10222
MKK9	myc2	28	1.43777
MKK9	myc2	28	1.45754
MKK9	myc2	28	1.29851
MKK9	jin1-2	22	1.12059
MKK9	jin1-2	22	0.796946
MKK9	jin1-2	22	0.852777
MKK9	jin1-2	28	0.984303
MKK9	jin1-2	28	1.03259
MKK9	jin1-2	28	0.832102
STY46	Col-0	22	1.7492
STY46	Col-0	22	1.60747
STY46	Col-0	22	1.43309
STY46	Col-0	28	2.6383
STY46	Col-0	28	2.62216
STY46	Col-0	28	2.86211
STY46	kcs1/2/20	22	1.57591
STY46	kcs1/2/20	22	1.60703
STY46	kcs1/2/20	22	1.78461
STY46	kcs1/2/20	28	1.57686
STY46	kcs1/2/20	28	1.65273
STY46	kcs1/2/20	28	2.21361
STY46	zat10	22	2.86169
STY46	zat10	22	2.0565
STY46	zat10	22	1.58355
STY46	zat10	28	1.11213
STY46	zat10	28	1.32114
STY46	zat10	28	1.07557
STY46	myc2	22	2.26576
STY46	myc2	22	1.7655
STY46	myc2	22	1.37543
STY46	myc2	28	1.29432
STY46	myc2	28	1.2597
STY46	myc2	28	1.46393
STY46	jin1-2	22	1.8659
STY46	jin1-2	22	1.56831
STY46	jin1-2	22	1.77039
STY46	jin1-2	28	1.92764
STY46	jin1-2	28	2.11547
STY46	jin1-2	28	2.14093

## Sheet: Fig. 6
Fig. 6b Primary root length					Fig. 6c Cortex cell length in the Maturation zone
Genotype	Primary Root Length	temperature			Genotype	temperature	MaZ Cell Length
Col-0	4.853	22			Col-0	22	216.567
Col-0	5.685	22			Col-0	22	190.811
Col-0	5.234	22			Col-0	22	171.381
Col-0	4.332	22			Col-0	22	161.634
Col-0	5.689	22			Col-0	22	249.022
Col-0	5.028	22			Col-0	22	183.784
Col-0	3.896	22			Col-0	22	169.895
Col-0	5.172	22			Col-0	22	190.43
Col-0	4.951	22			Col-0	22	170.027
Col-0	5.187	22			Col-0	22	188.735
Col-0	5.026	22			Col-0	22	179.704
Col-0	4.632	22			Col-0	22	182.593
Col-0	4.513	22			Col-0	22	198.078
Col-0	4.634	22			Col-0	22	169.209
Col-0	4.76	22			Col-0	22	168.816
Col-0	4.848	22			Col-0	22	175.171
Col-0	5.054	22			Col-0	22	138.786
Col-0	5.173	22			Col-0	22	234.3
Col-0	3.549	22			Col-0	22	215.274
Col-0	4.248	22			Col-0	22	228.864
Col-0	5.231	22			Col-0	22	218.832
Col-0	4.884	22			Col-0	22	215.536
Col-0	4.962	22			Col-0	22	202.942
Col-0	4.92	22			Col-0	22	179.245
Col-0	6.331	28			Col-0	22	168.847
Col-0	6.462	28			Col-0	22	243.457
Col-0	7.723	28			Col-0	22	189.042
Col-0	6.812	28			Col-0	22	212.473
Col-0	6.606	28			Col-0	22	247.251
Col-0	6.61	28			Col-0	22	195.852
Col-0	6.875	28			Col-0	22	165.16
Col-0	6.664	28			Col-0	22	214.971
Col-0	6.87	28			Col-0	22	181.098
Col-0	6.967	28			Col-0	22	152.614
Col-0	6.59	28			Col-0	22	161.272
Col-0	7.25	28			Col-0	22	173.518
Col-0	6.003	28			Col-0	22	160.331
Col-0	5.419	28			Col-0	22	175.828
Col-0	5.683	28			Col-0	22	135.66
Col-0	6.189	28			Col-0	22	225.927
Col-0	6.168	28			Col-0	22	202.654
Col-0	7.049	28			Col-0	22	213.326
Col-0	6.282	28			Col-0	22	190.09
Col-0	6.078	28			Col-0	22	187.56
mkk9-1	3.2	22			Col-0	22	193.531
mkk9-1	3.284	22			Col-0	22	172.238
mkk9-1	5.081	22			Col-0	22	248.888
mkk9-1	3.926	22			Col-0	22	233.795
mkk9-1	4.362	22			Col-0	22	195.048
mkk9-1	3.48	22			Col-0	22	198.644
mkk9-1	2.93	22			Col-0	22	188.364
mkk9-1	2.991	22			Col-0	22	196.528
mkk9-1	2.972	22			Col-0	22	179.28
mkk9-1	3.285	22			Col-0	22	179.667
mkk9-1	3.905	22			Col-0	22	170.941
mkk9-1	3.39	22			Col-0	22	155.895
mkk9-1	3.138	22			Col-0	22	229.825
mkk9-1	3.619	22			Col-0	22	276.115
mkk9-1	3.635	22			Col-0	22	168.057
mkk9-1	2.803	22			Col-0	22	220.422
mkk9-1	4.133	22			Col-0	22	209.052
mkk9-1	5.746	28			Col-0	22	190.74
mkk9-1	5.08	28			Col-0	22	195.558
mkk9-1	3.769	28			Col-0	22	225.128
mkk9-1	3.815	28			Col-0	22	186.524
mkk9-1	4.76	28			Col-0	22	178.123
mkk9-1	4.302	28			Col-0	22	235.357
mkk9-1	5.441	28			Col-0	22	185.325
mkk9-1	5.586	28			Col-0	22	253.502
mkk9-1	3.302	28			Col-0	22	174.738
mkk9-1	5.446	28			Col-0	22	175.859
mkk9-1	5.08	28			Col-0	22	207.043
mkk9-1	6.172	28			Col-0	22	157.051
mkk9-1	5.36	28			Col-0	22	205.408
mkk9-1	2.554	28			Col-0	22	213.819
mkk9-1	5.498	28			Col-0	22	207.057
mkk9-1	4.965	28			Col-0	22	230.873
mkk9-1	3.768	28			Col-0	22	199.596
mkk9-2	2.235	22			Col-0	22	204.226
mkk9-2	2.064	22			Col-0	22	191.788
mkk9-2	1.996	22			Col-0	22	182.654
mkk9-2	3.616	22			Col-0	22	188.429
mkk9-2	3.574	22			Col-0	22	245.656
mkk9-2	2.963	22			Col-0	22	178.688
mkk9-2	1.815	22			Col-0	22	183.527
mkk9-2	3.108	22			Col-0	28	227.348
mkk9-2	3.45	22			Col-0	28	215.062
mkk9-2	3.061	22			Col-0	28	240.411
mkk9-2	3.304	22			Col-0	28	237.884
mkk9-2	3.725	22			Col-0	28	219.399
mkk9-2	2.503	22			Col-0	28	260.924
mkk9-2	2.25	22			Col-0	28	256.369
mkk9-2	3.069	22			Col-0	28	174.606
mkk9-2	3.399	22			Col-0	28	259.537
mkk9-2	2.64	22			Col-0	28	207.355
mkk9-2	3.613	22			Col-0	28	214.534
mkk9-2	4.959	28			Col-0	28	255.916
mkk9-2	4.076	28			Col-0	28	272.334
mkk9-2	4.345	28			Col-0	28	189.417
mkk9-2	4.997	28			Col-0	28	257.226
mkk9-2	4.433	28			Col-0	28	206.723
mkk9-2	4.339	28			Col-0	28	260.96
mkk9-2	4.179	28			Col-0	28	213.436
mkk9-2	4.52	28			Col-0	28	288.473
mkk9-2	3.789	28			Col-0	28	177.552
mkk9-2	4.577	28			Col-0	28	227.8
mkk9-2	4.305	28			Col-0	28	272.39
mkk9-2	5.128	28			Col-0	28	276.532
mkk9-2	5.38	28			Col-0	28	278.71
mkk9-2	5.67	28			Col-0	28	230.692
mkk9-2	4.372	28			Col-0	28	201.796
mkk9-2	4.276	28			Col-0	28	204.404
mkk9-2	5.117	28			Col-0	28	262.151
mkk9-2	4.819	28			Col-0	28	272.39
mkk9-2	5.784	28			Col-0	28	257.927
mkk9-2	4.854	28			Col-0	28	221.453
mkk9-2	4.259	28			Col-0	28	238.232
mkk9-2	3.834	28			Col-0	28	282.829
mkk9-2	2.384	28			Col-0	28	235.142
mkk9-2	4.365	28			Col-0	28	303.629
sty46-1	4.035	22			Col-0	28	206.567
sty46-1	3.024	22			Col-0	28	242.062
sty46-1	4.273	22			Col-0	28	239.2
sty46-1	4.522	22			Col-0	28	244.175
sty46-1	3.256	22			Col-0	28	188.472
sty46-1	3.866	22			Col-0	28	210.027
sty46-1	2.21	22			Col-0	28	180.498
sty46-1	2.767	22			Col-0	28	228.682
sty46-1	1.676	22			Col-0	28	268.436
sty46-1	1.743	22			Col-0	28	281.817
sty46-1	3.6	22			Col-0	28	274.53
sty46-1	2.206	22			Col-0	28	258.646
sty46-1	5.216	28			Col-0	28	229.077
sty46-1	2.045	28			Col-0	28	271.368
sty46-1	3.809	28			Col-0	28	200.982
sty46-1	2.032	28			Col-0	28	236.799
sty46-1	2.947	28			Col-0	28	282.95
sty46-1	2.69	28			Col-0	28	241.299
sty46-1	3.741	28			Col-0	28	245.245
sty46-1	4.993	28			Col-0	28	198.132
sty46-1	4.253	28			Col-0	28	267.827
sty46-1	2.21	28			Col-0	28	238.363
sty46-1	3.716	28			Col-0	28	193.483
sty46-2	3.988	22			Col-0	28	195.842
sty46-2	4.332	22			Col-0	28	235.865
sty46-2	4.209	22			Col-0	28	219.714
sty46-2	3.721	22			Col-0	28	213.883
sty46-2	3.17	22			Col-0	28	234.193
sty46-2	4.278	22			Col-0	28	273.944
sty46-2	4.178	22			Col-0	28	151.424
sty46-2	4.345	22			Col-0	28	237.224
sty46-2	2.807	22			Col-0	28	219.174
sty46-2	3.738	22			Col-0	28	180.736
sty46-2	3.707	22			Col-0	28	190.901
sty46-2	4.446	22			Col-0	28	233.656
sty46-2	4.026	22			Col-0	28	219.895
sty46-2	2.674	22			Col-0	28	220.505
sty46-2	4.082	22			Col-0	28	258.022
sty46-2	4.351	22			Col-0	28	257.551
sty46-2	4.47	22			Col-0	28	250.487
sty46-2	3.474	22			Col-0	28	232.851
sty46-2	3.68	22			Col-0	28	238.277
sty46-2	3.728	22			Col-0	28	201.789
sty46-2	4.136	22			Col-0	28	252.3
sty46-2	3.347	22			Col-0	28	279.265
sty46-2	1.762	22			Col-0	28	285.184
sty46-2	3.048	22			Col-0	28	268.356
sty46-2	4.659	28			Col-0	28	174.418
sty46-2	3.762	28			Col-0	28	182.012
sty46-2	5.5	28			Col-0	28	235.59
sty46-2	5.081	28			Col-0	28	251.853
sty46-2	4.38	28			Col-0	28	186.896
sty46-2	2.848	28			Col-0	28	235.466
sty46-2	4.501	28			Col-0	28	178.374
sty46-2	4.03	28			Col-0	28	231.597
sty46-2	5.22	28			mkk9-1	22	269.362
sty46-2	5.597	28			mkk9-1	22	253.353
sty46-2	5.299	28			mkk9-1	22	262.798
sty46-2	5.069	28			mkk9-1	22	260.989
sty46-2	3.418	28			mkk9-1	22	266.641
sty46-2	5.607	28			mkk9-1	22	198.72
sty46-2	4.744	28			mkk9-1	22	169.158
sty46-2	5.706	28			mkk9-1	22	190.407
sty46-2	4.93	28			mkk9-1	22	197.441
sty46-2	4.86	28			mkk9-1	22	185.746
sty46-2	6.458	28			mkk9-1	22	186.932
sty46-2	5.467	28			mkk9-1	22	124.436
sty46-2	4.401	28			mkk9-1	22	165.077
sty46-2	4.497	28			mkk9-1	22	143.73
sty46-2	4.559	28			mkk9-1	22	240.47
acs6	4.038	22			mkk9-1	22	223.733
acs6	4.27	22			mkk9-1	22	277.024
acs6	3.289	22			mkk9-1	22	167.091
acs6	2.721	22			mkk9-1	22	167.52
acs6	4.286	22			mkk9-1	22	152.194
acs6	2.903	22			mkk9-1	22	150.252
acs6	5.085	22			mkk9-1	22	209.378
acs6	3.823	22			mkk9-1	22	162.534
acs6	3.958	22			mkk9-1	22	173.399
acs6	4.172	22			mkk9-1	22	108.631
acs6	3.875	22			mkk9-1	22	213.641
acs6	3.459	22			mkk9-1	22	226.176
acs6	3.908	22			mkk9-1	22	228.814
acs6	4.476	22			mkk9-1	22	212.76
acs6	4.31	22			mkk9-1	22	214.594
acs6	5.503	22			mkk9-1	22	148.576
acs6	5.736	22			mkk9-1	22	144.269
acs6	4.021	22			mkk9-1	22	145.379
acs6	4.515	22			mkk9-1	22	151.487
acs6	5.145	22			mkk9-1	22	167.277
acs6	5.083	22			mkk9-1	22	197.536
acs6	3.495	22			mkk9-1	22	123.339
acs6	3.556	22			mkk9-1	22	208.507
acs6	3.806	22			mkk9-1	22	170.103
acs6	6.344	28			mkk9-1	22	147.864
acs6	5.712	28			mkk9-1	22	225.397
acs6	6.314	28			mkk9-1	22	193.515
acs6	5.846	28			mkk9-1	22	176.603
acs6	5.838	28			mkk9-1	22	183.847
acs6	5.76	28			mkk9-1	22	217.588
acs6	6.488	28			mkk9-1	22	104.588
acs6	7.365	28			mkk9-1	22	212.842
acs6	4.894	28			mkk9-1	22	235.236
acs6	5.678	28			mkk9-1	22	256.969
acs6	4.909	28			mkk9-1	22	181.636
acs6	6.499	28			mkk9-1	22	155.205
acs6	5.928	28			mkk9-1	22	121.889
acs6	6.506	28			mkk9-1	22	194.729
acs6	6.557	28			mkk9-1	22	202.173
acs6	7.315	28			mkk9-1	22	213.983
acs6	5.771	28			mkk9-1	22	273.573
acs6	6.106	28			mkk9-1	22	198.416
acs6	4.153	28			mkk9-1	22	187.698
acs6	5.745	28			mkk9-1	22	251.337
acs6	4.955	28			mkk9-1	22	223.324
					mkk9-1	22	284.293
					mkk9-1	22	253.631
					mkk9-1	22	218.12
One-way ANOVA					mkk9-1	22	190.678
Factor	Df	F value	p-value		mkk9-1	22	170.171
Genotype	11	40.24	< 2E-16		mkk9-1	22	157.051
Residuals	223	—	—		mkk9-1	22	183.011
					mkk9-1	22	225.617
Tukey's multiple comparisons test					mkk9-1	22	265.04
Comparison	p-value				mkk9-1	22	258.434
acs6 28℃ vs acs6 22℃	3.42759e-12				mkk9-1	22	184.361
Col-0 22℃ vs acs6 22℃	0.0512913				mkk9-1	22	134.325
Col-0 28℃ vs acs6 22℃	1.4333e-13				mkk9-1	22	187.659
mkk9-1 22℃ vs acs6 22℃	0.308293				mkk9-1	22	240.517
mkk9-1 28℃ vs acs6 22℃	0.320902				mkk9-1	22	221.843
mkk9-2 22℃ vs acs6 22℃	1.7829e-05				mkk9-1	22	124.812
mkk9-2 28℃ vs acs6 22℃	0.813863				mkk9-1	22	151.334
sty46-1 22℃ vs acs6 22℃	0.00554842				mkk9-1	22	234.136
sty46-1 28℃ vs acs6 22℃	0.258248				mkk9-1	22	207.522
sty46-2 22℃ vs acs6 22℃	0.768111				mkk9-1	22	205.866
sty46-2 28℃ vs acs6 22℃	0.0997414				mkk9-1	22	149.374
Col-0 22℃ vs acs6 28℃	0.000134489				mkk9-1	22	172.41
Col-0 28℃ vs acs6 28℃	0.315304				mkk9-1	22	217.191
mkk9-1 22℃ vs acs6 28℃	1.61538e-13				mkk9-1	22	131.343
mkk9-1 28℃ vs acs6 28℃	0.000113546				mkk9-1	22	152.32
mkk9-2 22℃ vs acs6 28℃	4.78506e-14				mkk9-1	22	169.38
mkk9-2 28℃ vs acs6 28℃	9.98006e-08				mkk9-1	22	186.05
sty46-1 22℃ vs acs6 28℃	1.45994e-13				mkk9-1	22	191.262
sty46-1 28℃ vs acs6 28℃	1.63536e-13				mkk9-1	22	113.855
sty46-2 22℃ vs acs6 28℃	1.61093e-13				mkk9-1	22	143.097
sty46-2 28℃ vs acs6 28℃	6.87188e-05				mkk9-1	22	187.821
Col-0 28℃ vs Col-0 22℃	1.4801e-10				mkk9-1	22	211.387
mkk9-1 22℃ vs Col-0 22℃	4.92458e-06				mkk9-1	22	218.325
mkk9-1 28℃ vs Col-0 22℃	0.999999				mkk9-1	22	159.091
mkk9-2 22℃ vs Col-0 22℃	6.45928e-13				mkk9-1	22	205.685
mkk9-2 28℃ vs Col-0 22℃	0.94206				mkk9-1	22	212.83
sty46-1 22℃ vs Col-0 22℃	1.45364e-08				mkk9-1	22	277.755
sty46-1 28℃ vs Col-0 22℃	2.12532e-05				mkk9-1	22	200.527
sty46-2 22℃ vs Col-0 22℃	3.18467e-05				mkk9-1	22	264.371
sty46-2 28℃ vs Col-0 22℃	1				mkk9-1	22	178.305
mkk9-1 22℃ vs Col-0 28℃	5.18474e-14				mkk9-1	22	202.694
mkk9-1 28℃ vs Col-0 28℃	4.09309e-10				mkk9-1	22	124.368
mkk9-2 22℃ vs Col-0 28℃	4.74065e-14				mkk9-1	22	152.836
mkk9-2 28℃ vs Col-0 28℃	1.75526e-13				mkk9-1	22	148.247
sty46-1 22℃ vs Col-0 28℃	4.80727e-14				mkk9-1	22	138.194
sty46-1 28℃ vs Col-0 28℃	1.06248e-13				mkk9-1	22	215.338
sty46-2 22℃ vs Col-0 28℃	4.91829e-14				mkk9-1	22	213.508
sty46-2 28℃ vs Col-0 28℃	7.08603e-11				mkk9-1	22	159.339
mkk9-1 28℃ vs mkk9-1 22℃	0.000263047				mkk9-1	22	244.141
mkk9-2 22℃ vs mkk9-1 22℃	0.354795				mkk9-1	22	226.048
mkk9-2 28℃ vs mkk9-1 22℃	0.00219294				mkk9-1	22	178.603
sty46-1 22℃ vs mkk9-1 22℃	0.920941				mkk9-1	22	156.555
sty46-1 28℃ vs mkk9-1 22℃	1				mkk9-1	22	141.264
sty46-2 22℃ vs mkk9-1 22℃	0.999482				mkk9-1	22	227.205
sty46-2 28℃ vs mkk9-1 22℃	1.56183e-05				mkk9-1	22	256.406
mkk9-2 22℃ vs mkk9-1 28℃	4.03193e-10				mkk9-1	22	112.88
mkk9-2 28℃ vs mkk9-1 28℃	0.999105				mkk9-1	22	232.263
sty46-1 22℃ vs mkk9-1 28℃	1.12903e-06				mkk9-1	22	156.816
sty46-1 28℃ vs mkk9-1 28℃	0.000480112				mkk9-1	22	102.619
sty46-2 22℃ vs mkk9-1 28℃	0.00179504				mkk9-1	22	134.576
sty46-2 28℃ vs mkk9-1 28℃	1				mkk9-1	22	134.93
mkk9-2 28℃ vs mkk9-2 22℃	2.32218e-09				mkk9-1	22	97.388
sty46-1 22℃ vs mkk9-2 22℃	0.999942				mkk9-1	22	156.841
sty46-1 28℃ vs mkk9-2 22℃	0.818895				mkk9-1	22	158.999
sty46-2 22℃ vs mkk9-2 22℃	0.0227927				mkk9-1	22	136.69
sty46-2 28℃ vs mkk9-2 22℃	2.77145e-12				mkk9-1	22	264.543
sty46-1 22℃ vs mkk9-2 28℃	9.22106e-06				mkk9-1	22	157.989
sty46-1 28℃ vs mkk9-2 28℃	0.00352963				mkk9-1	22	112.658
sty46-2 22℃ vs mkk9-2 28℃	0.0146402				mkk9-1	22	144.774
sty46-2 28℃ vs mkk9-2 28℃	0.981878				mkk9-1	22	143.707
sty46-1 28℃ vs sty46-1 22℃	0.996495				mkk9-1	22	148.482
sty46-2 22℃ vs sty46-1 22℃	0.394782				mkk9-1	22	244.922
sty46-2 28℃ vs sty46-1 22℃	4.81968e-08				mkk9-1	22	166.702
sty46-2 22℃ vs sty46-1 28℃	0.991455				mkk9-1	22	185.108
sty46-2 28℃ vs sty46-1 28℃	5.38976e-05				mkk9-1	22	122.041
sty46-2 28℃ vs sty46-2 22℃	0.000105443				mkk9-1	22	227.23
					mkk9-1	22	219.768
					mkk9-1	22	219.883
					mkk9-1	22	184.574
					mkk9-1	22	157.66
					mkk9-1	22	227.118
					mkk9-1	22	222.953
					mkk9-1	22	122.922
					mkk9-1	22	154.194
					mkk9-1	22	169.274
					mkk9-1	22	162.382
					mkk9-1	22	183.341
					mkk9-1	22	157.628
					mkk9-1	22	159.436
					mkk9-1	22	167.885
					mkk9-1	22	151.895
					mkk9-1	22	198.977
					mkk9-1	22	159.379
					mkk9-1	22	197.326
					mkk9-1	22	187.2
					mkk9-1	22	208.739
					mkk9-1	22	197.473
					mkk9-1	22	199.312
					mkk9-1	22	211.315
					mkk9-1	22	204.632
					mkk9-1	22	199.113
					mkk9-1	22	250.53
					mkk9-1	22	130.93
					mkk9-1	22	229.506
					mkk9-1	22	173.474
					mkk9-1	22	189.471
					mkk9-1	22	189.818
					mkk9-1	22	258.292
					mkk9-1	28	334.983
					mkk9-1	28	235.447
					mkk9-1	28	195.113
					mkk9-1	28	277.642
					mkk9-1	28	192.15
					mkk9-1	28	268.091
					mkk9-1	28	116.617
					mkk9-1	28	247.653
					mkk9-1	28	245.357
					mkk9-1	28	195.502
					mkk9-1	28	216.891
					mkk9-1	28	216.519
					mkk9-1	28	142.585
					mkk9-1	28	178.453
					mkk9-1	28	241.361
					mkk9-1	28	219.013
					mkk9-1	28	87.282
					mkk9-1	28	195.912
					mkk9-1	28	199.225
					mkk9-1	28	231.753
					mkk9-1	28	221.906
					mkk9-1	28	192.642
					mkk9-1	28	211.256
					mkk9-1	28	206.502
					mkk9-1	28	212.903
					mkk9-1	28	124.856
					mkk9-1	28	234.439
					mkk9-1	28	223.333
					mkk9-1	28	261.01
					mkk9-1	28	187.112
					mkk9-1	28	217.575
					mkk9-1	28	160.637
					mkk9-1	28	119.313
					mkk9-1	28	230.225
					mkk9-1	28	233.388
					mkk9-1	28	181.295
					mkk9-1	28	234.008
					mkk9-1	28	149.871
					mkk9-1	28	251.587
					mkk9-1	28	169.185
					mkk9-1	28	238.005
					mkk9-1	28	187.305
					mkk9-1	28	211.763
					mkk9-1	28	189.075
					mkk9-1	28	188.901
					mkk9-1	28	164.998
					mkk9-1	28	167.563
					mkk9-1	28	174.028
					mkk9-1	28	189.352
					mkk9-1	28	171.696
					mkk9-1	28	127.027
					mkk9-1	28	87.558
					mkk9-1	28	247.611
					mkk9-1	28	204.092
					mkk9-1	28	140.367
					mkk9-1	28	171.673
					mkk9-1	28	160.966
					mkk9-1	28	161.282
					mkk9-1	28	172.901
					mkk9-1	28	150.642
					mkk9-1	28	152.683
					mkk9-1	28	298.564
					mkk9-1	28	178.328
					mkk9-1	28	202.417
					mkk9-1	28	195.303
					mkk9-1	28	142.778
					mkk9-1	28	331.741
					mkk9-1	28	219.721
					mkk9-1	28	189.471
					mkk9-1	28	292.659
					mkk9-1	28	212.461
					mkk9-1	28	193.365
					mkk9-1	28	266.891
					mkk9-1	28	188.098
					mkk9-1	28	249.627
					mkk9-1	28	184.155
					mkk9-1	28	169.007
					mkk9-1	28	206.33
					mkk9-1	28	229.331
					mkk9-1	28	198.931
					mkk9-1	28	267.273
					mkk9-1	28	111.204
					mkk9-1	28	241.028
					mkk9-1	28	183.79
					mkk9-1	28	241.589
					mkk9-1	28	166.613
					mkk9-1	28	162.554
					mkk9-1	28	182.907
					mkk9-1	28	168.078
					mkk9-1	28	236.836
					mkk9-1	28	110.624
					mkk9-1	28	186.862
					mkk9-1	28	171.69
					mkk9-1	28	156.865
					mkk9-1	28	227.88
					mkk9-1	28	269.504
					mkk9-1	28	208.159
					mkk9-1	28	167.772
					mkk9-1	28	193.287
					mkk9-1	28	284.536
					mkk9-1	28	201.045
					mkk9-1	28	240.515
					mkk9-1	28	261.397
					mkk9-1	28	222.06
					mkk9-1	28	200.059
					mkk9-1	28	272.844
					mkk9-1	28	239.345
					mkk9-1	28	135.868
					mkk9-1	28	174.367
					mkk9-1	28	180.269
					mkk9-1	28	212.229
					mkk9-1	28	171.075
					mkk9-1	28	150.567
					mkk9-1	28	144.227
					mkk9-1	28	193.091
					mkk9-1	28	269.612
					mkk9-1	28	195.05
					mkk9-1	28	226.539
					mkk9-1	28	205.895
					mkk9-1	28	208.509
					mkk9-1	28	253.344
					mkk9-1	28	196.34
					mkk9-1	28	233.58
					mkk9-1	28	241.852
					mkk9-1	28	159.919
					mkk9-1	28	128.295
					mkk9-1	28	158.318
					mkk9-1	28	181.206
					mkk9-1	28	231.663
					mkk9-1	28	262.505
					mkk9-1	28	192.738
					mkk9-1	28	219.013
					mkk9-1	28	176.72
					mkk9-1	28	264.685
					mkk9-1	28	138.896
					mkk9-1	28	167.263
					mkk9-1	28	213.185
					mkk9-1	28	175.02
					mkk9-1	28	202.803
					mkk9-1	28	176.199
					mkk9-1	28	207.196
					mkk9-1	28	247.85
					mkk9-1	28	238.735
					mkk9-1	28	149.168
					mkk9-1	28	150.104
					mkk9-1	28	147.616
					mkk9-1	28	251.309
					mkk9-1	28	215.789
					mkk9-1	28	136.704
					mkk9-1	28	196.739
					mkk9-1	28	189.516
					mkk9-1	28	162.245
					mkk9-1	28	206.011
					mkk9-1	28	212.934
					mkk9-1	28	150.266
					mkk9-1	28	144.689
					mkk9-1	28	190.282
					mkk9-1	28	223.369
					mkk9-1	28	188.915
					mkk9-1	28	209.066
					mkk9-1	28	269.104
					mkk9-2	22	238.591
					mkk9-2	22	189.839
					mkk9-2	22	188.164
					mkk9-2	22	170.038
					mkk9-2	22	228.878
					mkk9-2	22	223.461
					mkk9-2	22	201.378
					mkk9-2	22	196.619
					mkk9-2	22	132.906
					mkk9-2	22	141.516
					mkk9-2	22	137.152
					mkk9-2	22	219.06
					mkk9-2	22	210.169
					mkk9-2	22	164.063
					mkk9-2	22	172.099
					mkk9-2	22	255.026
					mkk9-2	22	222.707
					mkk9-2	22	183.449
					mkk9-2	22	220.603
					mkk9-2	22	139.966
					mkk9-2	22	189.652
					mkk9-2	22	159.403
					mkk9-2	22	192.341
					mkk9-2	22	147.86
					mkk9-2	22	133.916
					mkk9-2	22	154.306
					mkk9-2	22	145.034
					mkk9-2	22	207.687
					mkk9-2	22	219.268
					mkk9-2	22	153.527
					mkk9-2	22	201.782
					mkk9-2	22	137.839
					mkk9-2	22	201.848
					mkk9-2	22	194.025
					mkk9-2	22	174.514
					mkk9-2	22	231.269
					mkk9-2	22	212.275
					mkk9-2	22	211.998
					mkk9-2	22	223.474
					mkk9-2	22	198.454
					mkk9-2	22	257.759
					mkk9-2	22	181.909
					mkk9-2	22	206.333
					mkk9-2	22	249.187
					mkk9-2	22	170.433
					mkk9-2	22	263.303
					mkk9-2	22	217.263
					mkk9-2	22	179.761
					mkk9-2	22	232.489
					mkk9-2	22	168.862
					mkk9-2	22	187.592
					mkk9-2	22	207.088
					mkk9-2	22	215.865
					mkk9-2	22	147.365
					mkk9-2	22	186.296
					mkk9-2	22	171.813
					mkk9-2	22	220.347
					mkk9-2	22	214.72
					mkk9-2	22	232.641
					mkk9-2	22	154.877
					mkk9-2	22	208.995
					mkk9-2	22	232.568
					mkk9-2	22	244.241
					mkk9-2	22	292.156
					mkk9-2	22	195.245
					mkk9-2	22	186.414
					mkk9-2	22	245.66
					mkk9-2	22	231.758
					mkk9-2	22	175.271
					mkk9-2	22	156.831
					mkk9-2	22	158.02
					mkk9-2	22	144.743
					mkk9-2	22	156.323
					mkk9-2	22	240.552
					mkk9-2	22	240.88
					mkk9-2	22	179.116
					mkk9-2	22	156.847
					mkk9-2	22	319.344
					mkk9-2	22	207.039
					mkk9-2	22	205.238
					mkk9-2	22	182.684
					mkk9-2	22	139.845
					mkk9-2	22	236.221
					mkk9-2	22	246.825
					mkk9-2	22	167.811
					mkk9-2	22	181.64
					mkk9-2	22	237.105
					mkk9-2	22	260.692
					mkk9-2	22	291.076
					mkk9-2	22	167.806
					mkk9-2	22	180.405
					mkk9-2	22	222.32
					mkk9-2	22	249.859
					mkk9-2	22	260.48
					mkk9-2	22	192.62
					mkk9-2	22	192.534
					mkk9-2	22	245.279
					mkk9-2	22	171.55
					mkk9-2	22	164.196
					mkk9-2	22	171.813
					mkk9-2	22	264.083
					mkk9-2	22	303.259
					mkk9-2	22	296.789
					mkk9-2	22	284.254
					mkk9-2	22	251.32
					mkk9-2	22	286.592
					mkk9-2	22	103.282
					mkk9-2	22	299.031
					mkk9-2	22	175.722
					mkk9-2	22	242.35
					mkk9-2	22	229.701
					mkk9-2	22	212.718
					mkk9-2	22	205.827
					mkk9-2	22	168.351
					mkk9-2	22	181.452
					mkk9-2	22	171.289
					mkk9-2	22	172.131
					mkk9-2	22	180.163
					mkk9-2	22	191.381
					mkk9-2	22	279.811
					mkk9-2	22	203.662
					mkk9-2	22	162.47
					mkk9-2	22	204.085
					mkk9-2	22	197.651
					mkk9-2	22	176.573
					mkk9-2	22	242.849
					mkk9-2	22	247.244
					mkk9-2	22	209.502
					mkk9-2	22	187.423
					mkk9-2	22	182.41
					mkk9-2	22	180.95
					mkk9-2	22	213.061
					mkk9-2	22	248.843
					mkk9-2	22	247.425
					mkk9-2	22	157.578
					mkk9-2	22	124.349
					mkk9-2	22	202.644
					mkk9-2	22	207.475
					mkk9-2	22	251.231
					mkk9-2	22	216.934
					mkk9-2	22	200.605
					mkk9-2	22	151.053
					mkk9-2	22	233.388
					mkk9-2	22	196.832
					mkk9-2	22	143.18
					mkk9-2	22	152.788
					mkk9-2	22	132.629
					mkk9-2	22	138.815
					mkk9-2	22	148.371
					mkk9-2	22	139.775
					mkk9-2	22	146.347
					mkk9-2	22	129.146
					mkk9-2	22	167.861
					mkk9-2	22	177.818
					mkk9-2	22	167.558
					mkk9-2	22	175.796
					mkk9-2	22	262.325
					mkk9-2	22	253.629
					mkk9-2	22	248.321
					mkk9-2	22	291.415
					mkk9-2	22	304.131
					mkk9-2	22	272.06
					mkk9-2	22	240.666
					mkk9-2	22	125.305
					mkk9-2	22	148.614
					mkk9-2	22	192.522
					mkk9-2	22	219.888
					mkk9-2	22	190.352
					mkk9-2	22	242.449
					mkk9-2	22	209.751
					mkk9-2	22	127.839
					mkk9-2	22	241.249
					mkk9-2	22	147.152
					mkk9-2	22	151.448
					mkk9-2	22	181.176
					mkk9-2	22	177.197
					mkk9-2	22	302.183
					mkk9-2	22	167.621
					mkk9-2	22	265.69
					mkk9-2	22	171.595
					mkk9-2	22	180.444
					mkk9-2	22	167.688
					mkk9-2	28	246.075
					mkk9-2	28	279.201
					mkk9-2	28	159.651
					mkk9-2	28	236.098
					mkk9-2	28	151.882
					mkk9-2	28	212.849
					mkk9-2	28	210.494
					mkk9-2	28	232.461
					mkk9-2	28	213.37
					mkk9-2	28	157.033
					mkk9-2	28	219.862
					mkk9-2	28	251.989
					mkk9-2	28	186.547
					mkk9-2	28	170.511
					mkk9-2	28	163.572
					mkk9-2	28	179.324
					mkk9-2	28	145.132
					mkk9-2	28	275.421
					mkk9-2	28	224.699
					mkk9-2	28	285.704
					mkk9-2	28	164.379
					mkk9-2	28	180.688
					mkk9-2	28	312.646
					mkk9-2	28	205.815
					mkk9-2	28	316.897
					mkk9-2	28	233.01
					mkk9-2	28	184.487
					mkk9-2	28	146.957
					mkk9-2	28	167.499
					mkk9-2	28	219.742
					mkk9-2	28	227.146
					mkk9-2	28	183.571
					mkk9-2	28	209.376
					mkk9-2	28	164.103
					mkk9-2	28	133.775
					mkk9-2	28	224.003
					mkk9-2	28	198.356
					mkk9-2	28	230.602
					mkk9-2	28	234.015
					mkk9-2	28	143.936
					mkk9-2	28	201.224
					mkk9-2	28	166.396
					mkk9-2	28	189.731
					mkk9-2	28	204.198
					mkk9-2	28	276.095
					mkk9-2	28	232.851
					mkk9-2	28	234.257
					mkk9-2	28	176.394
					mkk9-2	28	217.2
					mkk9-2	28	138.44
					mkk9-2	28	211.795
					mkk9-2	28	178.825
					mkk9-2	28	179.174
					mkk9-2	28	165.217
					mkk9-2	28	193.392
					mkk9-2	28	229.108
					mkk9-2	28	264.782
					mkk9-2	28	176.035
					mkk9-2	28	245.202
					mkk9-2	28	185.349
					mkk9-2	28	293.771
					mkk9-2	28	228.558
					mkk9-2	28	210.556
					mkk9-2	28	168.305
					mkk9-2	28	221.344
					mkk9-2	28	162.952
					mkk9-2	28	195.98
					mkk9-2	28	271.125
					mkk9-2	28	249.614
					mkk9-2	28	223.298
					mkk9-2	28	237.819
					mkk9-2	28	201.031
					mkk9-2	28	256.711
					mkk9-2	28	258.33
					mkk9-2	28	191.324
					mkk9-2	28	278.536
					mkk9-2	28	184.846
					mkk9-2	28	169.403
					mkk9-2	28	315.529
					mkk9-2	28	273.243
					mkk9-2	28	207.039
					mkk9-2	28	206.744
					mkk9-2	28	171.894
					mkk9-2	28	263.564
					mkk9-2	28	140.023
					mkk9-2	28	177.88
					mkk9-2	28	150.034
					mkk9-2	28	233.508
					mkk9-2	28	221.165
					mkk9-2	28	173.611
					mkk9-2	28	299.429
					mkk9-2	28	204.793
					mkk9-2	28	176.369
					mkk9-2	28	191.693
					mkk9-2	28	213.218
					mkk9-2	28	233.204
					mkk9-2	28	242.565
					mkk9-2	28	239.994
					mkk9-2	28	233.331
					mkk9-2	28	201.045
					mkk9-2	28	186.296
					mkk9-2	28	272.684
					mkk9-2	28	192.982
					mkk9-2	28	170.045
					mkk9-2	28	218.152
					mkk9-2	28	225.688
					mkk9-2	28	250.035
					mkk9-2	28	169.387
					mkk9-2	28	228.201
					mkk9-2	28	166.985
					mkk9-2	28	189.599
					mkk9-2	28	163.012
					mkk9-2	28	197.531
					mkk9-2	28	238.386
					mkk9-2	28	136.642
					mkk9-2	28	146.641
					mkk9-2	28	241.099
					mkk9-2	28	166.763
					mkk9-2	28	206.827
					mkk9-2	28	151.106
					mkk9-2	28	183.493
					mkk9-2	28	195.016
					mkk9-2	28	192.03
					mkk9-2	28	216.827
					mkk9-2	28	253.401
					mkk9-2	28	223.235
					mkk9-2	28	232.758
					mkk9-2	28	246.344
					mkk9-2	28	142.967
					mkk9-2	28	145.328
					mkk9-2	28	165.873
					mkk9-2	28	210.929
					mkk9-2	28	240.776
					mkk9-2	28	210.181
					mkk9-2	28	155.259
					mkk9-2	28	226.002
					mkk9-2	28	198.668
					mkk9-2	28	173.839
					mkk9-2	28	188.586
					mkk9-2	28	164.531
					mkk9-2	28	211.434
					mkk9-2	28	226.438
					mkk9-2	28	243.042
					mkk9-2	28	244.685
					mkk9-2	28	260.499
					mkk9-2	28	155.738
					mkk9-2	28	275.958
					mkk9-2	28	199.089
					mkk9-2	28	207.075
					mkk9-2	28	268.202
					mkk9-2	28	254.716
					mkk9-2	28	244.639
					mkk9-2	28	243.219
					mkk9-2	28	266.024
					mkk9-2	28	287.198
					sty46-1	22	171.471
					sty46-1	22	192.697
					sty46-1	22	136.816
					sty46-1	22	149.074
					sty46-1	22	237.375
					sty46-1	22	159.016
					sty46-1	22	289.522
					sty46-1	22	174.854
					sty46-1	22	258.641
					sty46-1	22	213.156
					sty46-1	22	202.206
					sty46-1	22	287.041
					sty46-1	22	180.463
					sty46-1	22	177.913
					sty46-1	22	225.585
					sty46-1	22	307.569
					sty46-1	22	240.927
					sty46-1	22	232.918
					sty46-1	22	194.571
					sty46-1	22	173.11
					sty46-1	22	206.601
					sty46-1	22	205.479
					sty46-1	22	286.764
					sty46-1	22	195.083
					sty46-1	22	224.93
					sty46-1	22	171.649
					sty46-1	22	155.029
					sty46-1	22	147.132
					sty46-1	22	177.835
					sty46-1	22	189.867
					sty46-1	22	183.242
					sty46-1	22	202.953
					sty46-1	22	285.303
					sty46-1	22	128.521
					sty46-1	22	182.568
					sty46-1	22	159.877
					sty46-1	22	205.367
					sty46-1	22	281.12
					sty46-1	22	291.235
					sty46-1	22	155.109
					sty46-1	22	154.45
					sty46-1	22	232.172
					sty46-1	22	151.21
					sty46-1	22	261.701
					sty46-1	22	233.497
					sty46-1	22	220.949
					sty46-1	22	268.908
					sty46-1	22	271.572
					sty46-1	22	232.918
					sty46-1	22	214.124
					sty46-1	22	120.891
					sty46-1	22	273.407
					sty46-1	22	269.324
					sty46-1	22	221.87
					sty46-1	22	246.476
					sty46-1	22	205.806
					sty46-1	22	271.222
					sty46-1	22	168.776
					sty46-1	22	207.297
					sty46-1	22	153.542
					sty46-1	22	187.58
					sty46-1	22	149.871
					sty46-1	22	198.369
					sty46-1	22	198.165
					sty46-1	22	166.93
					sty46-1	22	175.665
					sty46-1	22	165.456
					sty46-1	22	159.052
					sty46-1	22	273.214
					sty46-1	22	213.413
					sty46-1	22	271.307
					sty46-1	22	149.722
					sty46-1	22	279.971
					sty46-1	22	148.78
					sty46-1	22	239.771
					sty46-1	22	224.532
					sty46-1	22	173.251
					sty46-1	22	195.938
					sty46-1	22	171.962
					sty46-1	22	172.18
					sty46-1	22	228.279
					sty46-1	22	220.609
					sty46-1	22	230.388
					sty46-1	22	178.692
					sty46-1	22	224.285
					sty46-1	22	136.314
					sty46-1	22	171.003
					sty46-1	22	140.835
					sty46-1	22	218.554
					sty46-1	22	199.358
					sty46-1	22	232.467
					sty46-1	22	212.839
					sty46-1	22	224.254
					sty46-1	22	265.605
					sty46-1	22	282.254
					sty46-1	22	216.218
					sty46-1	22	263.928
					sty46-1	22	227.829
					sty46-1	22	141.669
					sty46-1	22	145.352
					sty46-1	22	254.522
					sty46-1	22	297.785
					sty46-1	22	168.908
					sty46-1	22	190.717
					sty46-1	22	183.847
					sty46-1	22	223.054
					sty46-1	22	247.164
					sty46-1	22	141.622
					sty46-1	22	272.148
					sty46-1	22	225.503
					sty46-1	22	220.286
					sty46-1	22	211.775
					sty46-1	22	197.486
					sty46-1	22	226.536
					sty46-1	22	177.547
					sty46-1	22	169.825
					sty46-1	22	135.811
					sty46-1	22	160.302
					sty46-1	22	289.377
					sty46-1	22	177.094
					sty46-1	22	184.651
					sty46-1	22	220.038
					sty46-1	22	241.077
					sty46-1	22	240.658
					sty46-1	22	254.463
					sty46-1	22	260.131
					sty46-1	22	222.985
					sty46-1	22	197.064
					sty46-1	22	206.579
					sty46-1	22	225.521
					sty46-1	22	289.027
					sty46-1	22	217.753
					sty46-1	22	230.875
					sty46-1	22	175.943
					sty46-1	22	175.027
					sty46-1	22	158.754
					sty46-1	22	172.395
					sty46-1	22	182.703
					sty46-1	22	171.49
					sty46-1	22	164.852
					sty46-1	22	292.92
					sty46-1	22	186.995
					sty46-1	22	161.544
					sty46-1	22	190.045
					sty46-1	22	151.318
					sty46-1	22	120.903
					sty46-1	22	192.82
					sty46-1	22	166.233
					sty46-1	22	200.87
					sty46-1	22	241.292
					sty46-1	22	252.565
					sty46-1	22	173.892
					sty46-1	22	143.432
					sty46-1	22	143.16
					sty46-1	22	308.62
					sty46-1	22	142.146
					sty46-1	22	136.641
					sty46-1	22	183.732
					sty46-1	22	131.191
					sty46-1	22	176.76
					sty46-1	22	207.449
					sty46-1	22	187.265
					sty46-1	22	161.018
					sty46-1	22	152.492
					sty46-1	22	199.206
					sty46-1	22	141.337
					sty46-1	22	161.303
					sty46-1	22	227.846
					sty46-1	22	205.928
					sty46-1	22	195.603
					sty46-1	22	176.681
					sty46-1	22	216.954
					sty46-1	22	226.022
					sty46-1	22	189.471
					sty46-1	22	264.719
					sty46-1	22	202.401
					sty46-1	22	167.06
					sty46-1	28	231.611
					sty46-1	28	152.139
					sty46-1	28	167.001
					sty46-1	28	193.315
					sty46-1	28	224.427
					sty46-1	28	232.93
					sty46-1	28	195.738
					sty46-1	28	224.868
					sty46-1	28	231.942
					sty46-1	28	241.216
					sty46-1	28	249.321
					sty46-1	28	131.098
					sty46-1	28	156.866
					sty46-1	28	152.646
					sty46-1	28	205.551
					sty46-1	28	168.682
					sty46-1	28	164.331
					sty46-1	28	268.92
					sty46-1	28	234.079
					sty46-1	28	214.4
					sty46-1	28	173.118
					sty46-1	28	133.346
					sty46-1	28	186.265
					sty46-1	28	113.85
					sty46-1	28	144.444
					sty46-1	28	132.147
					sty46-1	28	139.431
					sty46-1	28	148.103
					sty46-1	28	156.261
					sty46-1	28	158.743
					sty46-1	28	90.369
					sty46-1	28	178.057
					sty46-1	28	292.638
					sty46-1	28	199.792
					sty46-1	28	183.707
					sty46-1	28	196.442
					sty46-1	28	180.762
					sty46-1	28	194.524
					sty46-1	28	287.715
					sty46-1	28	216.566
					sty46-1	28	128.658
					sty46-1	28	146.282
					sty46-1	28	181.684
					sty46-1	28	134.044
					sty46-1	28	170.217
					sty46-1	28	192.708
					sty46-1	28	193.393
					sty46-1	28	153.189
					sty46-1	28	222.551
					sty46-1	28	231.611
					sty46-1	28	146.29
					sty46-1	28	156.969
					sty46-1	28	158.051
					sty46-1	28	231.292
					sty46-1	28	251.999
					sty46-1	28	157.728
					sty46-1	28	128.513
					sty46-1	28	150.533
					sty46-1	28	251.1
					sty46-1	28	149.168
					sty46-1	28	147.643
					sty46-1	28	303.29
					sty46-1	28	263.968
					sty46-1	28	170.984
					sty46-1	28	230.713
					sty46-1	28	197.443
					sty46-1	28	184.524
					sty46-1	28	178.255
					sty46-1	28	158.502
					sty46-1	28	191.78
					sty46-1	28	142.298
					sty46-1	28	137.839
					sty46-1	28	143.203
					sty46-1	28	183.847
					sty46-1	28	167.169
					sty46-1	28	177.774
					sty46-1	28	166.634
					sty46-1	28	152.116
					sty46-1	28	164.108
					sty46-1	28	244.403
					sty46-1	28	179.57
					sty46-1	28	172.032
					sty46-1	28	137.047
					sty46-1	28	196.251
					sty46-1	28	188.907
					sty46-1	28	175.912
					sty46-1	28	180.36
					sty46-1	28	186.646
					sty46-1	28	201.453
					sty46-1	28	185.534
					sty46-1	28	169.158
					sty46-1	28	191.027
					sty46-1	28	148.637
					sty46-1	28	183.708
					sty46-1	28	257.553
					sty46-1	28	159.184
					sty46-1	28	176.235
					sty46-1	28	174.047
					sty46-1	28	137.239
					sty46-1	28	156.293
					sty46-1	28	157.151
					sty46-1	28	201.318
					sty46-1	28	199.837
					sty46-1	28	258.41
					sty46-1	28	134.877
					sty46-1	28	153.308
					sty46-1	28	152.857
					sty46-1	28	181.874
					sty46-1	28	213.801
					sty46-1	28	186.912
					sty46-1	28	214.155
					sty46-1	28	183.564
					sty46-1	28	216.863
					sty46-1	28	205.854
					sty46-1	28	235.207
					sty46-1	28	112.43
					sty46-1	28	173.278
					sty46-1	28	151.473
					sty46-1	28	227.409
					sty46-1	28	197.364
					sty46-1	28	152.008
					sty46-1	28	247.993
					sty46-1	28	227.662
					sty46-1	28	153.965
					sty46-1	28	164.002
					sty46-1	28	155.829
					sty46-1	28	190.807
					sty46-1	28	167.672
					sty46-1	28	247.259
					sty46-1	28	202.642
					sty46-1	28	212.024
					sty46-1	28	247.323
					sty46-1	28	168.642
					sty46-1	28	183.79
					sty46-1	28	140.498
					sty46-1	28	239.332
					sty46-1	28	235.208
					sty46-1	28	219.755
					sty46-1	28	197.091
					sty46-1	28	195.165
					sty46-1	28	195.592
					sty46-1	28	267.346
					sty46-1	28	143.07
					sty46-1	28	157.765
					sty46-1	28	145.708
					sty46-1	28	243.475
					sty46-1	28	208.576
					sty46-1	28	257.984
					sty46-1	28	227.273
					sty46-1	28	226.613
					sty46-1	28	265.013
					sty46-1	28	283.448
					sty46-1	28	205.761
					sty46-1	28	197.313
					sty46-1	28	183.12
					sty46-1	28	229.265
					sty46-1	28	167.728
					sty46-1	28	213.249
					sty46-1	28	206.1
					sty46-1	28	218.01
					sty46-1	28	211.944
					sty46-1	28	257.02
					sty46-1	28	222.036
					sty46-1	28	181.216
					sty46-1	28	188.565
					sty46-1	28	188.112
					sty46-1	28	160.227
					sty46-1	28	155.018
					sty46-1	28	170.869
					sty46-1	28	173.445
					sty46-2	22	219.964
					sty46-2	22	154.944
					sty46-2	22	143.923
					sty46-2	22	190.139
					sty46-2	22	212.215
					sty46-2	22	218.24
					sty46-2	22	203.121
					sty46-2	22	176.517
					sty46-2	22	159.531
					sty46-2	22	176.811
					sty46-2	22	150.533
					sty46-2	22	153.591
					sty46-2	22	226.857
					sty46-2	22	211.321
					sty46-2	22	236.592
					sty46-2	22	234.861
					sty46-2	22	205.643
					sty46-2	22	171.568
					sty46-2	22	164.282
					sty46-2	22	159.486
					sty46-2	22	168.763
					sty46-2	22	136.695
					sty46-2	22	186.764
					sty46-2	22	169.797
					sty46-2	22	196.725
					sty46-2	22	239.607
					sty46-2	22	215.147
					sty46-2	22	168.983
					sty46-2	22	198.694
					sty46-2	22	255.855
					sty46-2	22	223.052
					sty46-2	22	185.853
					sty46-2	22	195.798
					sty46-2	22	233.812
					sty46-2	22	181.245
					sty46-2	22	143.908
					sty46-2	22	166.828
					sty46-2	22	190.441
					sty46-2	22	126.071
					sty46-2	22	139.005
					sty46-2	22	179.684
					sty46-2	22	113.374
					sty46-2	22	143.73
					sty46-2	22	156.226
					sty46-2	22	193.628
					sty46-2	22	138.271
					sty46-2	22	130.462
					sty46-2	22	126.054
					sty46-2	22	185.844
					sty46-2	22	200.935
					sty46-2	22	139.709
					sty46-2	22	129.709
					sty46-2	22	136.043
					sty46-2	22	142.848
					sty46-2	22	170.548
					sty46-2	22	213.793
					sty46-2	22	223.651
					sty46-2	22	172.902
					sty46-2	22	131.473
					sty46-2	22	138.983
					sty46-2	22	130.047
					sty46-2	22	158.094
					sty46-2	22	148.068
					sty46-2	22	223.419
					sty46-2	22	138.768
					sty46-2	22	182.24
					sty46-2	22	263.749
					sty46-2	22	172.084
					sty46-2	22	141.822
					sty46-2	22	179.182
					sty46-2	22	158.646
					sty46-2	22	264.516
					sty46-2	22	237.806
					sty46-2	22	163.411
					sty46-2	22	146.863
					sty46-2	22	183.077
					sty46-2	22	286.017
					sty46-2	22	255.57
					sty46-2	22	228.607
					sty46-2	22	221.348
					sty46-2	22	222.751
					sty46-2	22	217.31
					sty46-2	22	214.794
					sty46-2	22	230.913
					sty46-2	22	191.371
					sty46-2	22	172.875
					sty46-2	22	248.708
					sty46-2	22	208.015
					sty46-2	22	275.541
					sty46-2	22	213.03
					sty46-2	22	291.072
					sty46-2	22	226.813
					sty46-2	22	168.093
					sty46-2	22	236.34
					sty46-2	22	217.794
					sty46-2	22	141.673
					sty46-2	22	141.422
					sty46-2	22	203.704
					sty46-2	22	180.027
					sty46-2	22	146.973
					sty46-2	22	217.318
					sty46-2	22	224.301
					sty46-2	22	244.37
					sty46-2	22	149.943
					sty46-2	22	188.453
					sty46-2	22	184.524
					sty46-2	22	211.093
					sty46-2	22	136.479
					sty46-2	22	211.803
					sty46-2	22	211.34
					sty46-2	22	214.225
					sty46-2	22	180.492
					sty46-2	22	172.961
					sty46-2	22	179.239
					sty46-2	22	199.828
					sty46-2	22	154.907
					sty46-2	22	170.568
					sty46-2	22	157.218
					sty46-2	22	294.918
					sty46-2	22	173.266
					sty46-2	22	176.108
					sty46-2	22	183.015
					sty46-2	22	196.87
					sty46-2	22	242.109
					sty46-2	22	207.727
					sty46-2	22	184.331
					sty46-2	22	253.029
					sty46-2	22	164.727
					sty46-2	22	176.1
					sty46-2	22	215.143
					sty46-2	22	195.194
					sty46-2	22	141.904
					sty46-2	22	127.033
					sty46-2	22	112.354
					sty46-2	22	180.575
					sty46-2	22	154.95
					sty46-2	22	168.203
					sty46-2	22	193.912
					sty46-2	22	123.311
					sty46-2	22	148.507
					sty46-2	22	187.596
					sty46-2	22	182.878
					sty46-2	22	121.293
					sty46-2	22	197.464
					sty46-2	22	112.477
					sty46-2	22	185.057
					sty46-2	22	110.046
					sty46-2	22	111.994
					sty46-2	22	189.768
					sty46-2	22	136.642
					sty46-2	22	121.693
					sty46-2	22	172.39
					sty46-2	22	138.29
					sty46-2	22	194.068
					sty46-2	22	196.489
					sty46-2	22	291.818
					sty46-2	22	253.37
					sty46-2	22	253.022
					sty46-2	22	197.185
					sty46-2	22	206.705
					sty46-2	22	236.561
					sty46-2	22	274.516
					sty46-2	22	208.698
					sty46-2	22	215.817
					sty46-2	22	219.931
					sty46-2	22	239.538
					sty46-2	22	158.493
					sty46-2	22	219.589
					sty46-2	22	218.444
					sty46-2	22	195.875
					sty46-2	22	176.766
					sty46-2	22	209.243
					sty46-2	22	155.259
					sty46-2	22	241.279
					sty46-2	22	189.018
					sty46-2	22	326.657
					sty46-2	22	201.574
					sty46-2	22	252.625
					sty46-2	22	148.167
					sty46-2	22	147.803
					sty46-2	22	189.685
					sty46-2	22	141.143
					sty46-2	28	231.838
					sty46-2	28	173.46
					sty46-2	28	184.169
					sty46-2	28	208.462
					sty46-2	28	228.869
					sty46-2	28	208.421
					sty46-2	28	253.011
					sty46-2	28	244.177
					sty46-2	28	160.616
					sty46-2	28	226.72
					sty46-2	28	153.628
					sty46-2	28	200.864
					sty46-2	28	264.057
					sty46-2	28	232.695
					sty46-2	28	270.038
					sty46-2	28	240.743
					sty46-2	28	226.665
					sty46-2	28	241.573
					sty46-2	28	138.958
					sty46-2	28	282.98
					sty46-2	28	166.281
					sty46-2	28	204.085
					sty46-2	28	197.676
					sty46-2	28	200.194
					sty46-2	28	180.798
					sty46-2	28	157.208
					sty46-2	28	110.077
					sty46-2	28	275.173
					sty46-2	28	208.342
					sty46-2	28	200.221
					sty46-2	28	159.537
					sty46-2	28	181.222
					sty46-2	28	206.528
					sty46-2	28	170.094
					sty46-2	28	122.019
					sty46-2	28	258.218
					sty46-2	28	225.313
					sty46-2	28	219.862
					sty46-2	28	219.289
					sty46-2	28	180.123
					sty46-2	28	163.65
					sty46-2	28	118.277
					sty46-2	28	211.152
					sty46-2	28	197.441
					sty46-2	28	223.097
					sty46-2	28	146.919
					sty46-2	28	153.411
					sty46-2	28	168.831
					sty46-2	28	126.321
					sty46-2	28	235.573
					sty46-2	28	175.651
					sty46-2	28	132.295
					sty46-2	28	163.897
					sty46-2	28	211.828
					sty46-2	28	148.584
					sty46-2	28	239.617
					sty46-2	28	163.118
					sty46-2	28	149.94
					sty46-2	28	151.461
					sty46-2	28	213.495
					sty46-2	28	209.73
					sty46-2	28	164.823
					sty46-2	28	182.701
					sty46-2	28	234.731
					sty46-2	28	152.614
					sty46-2	28	160.185
					sty46-2	28	163.505
					sty46-2	28	359.448
					sty46-2	28	208.458
					sty46-2	28	155.524
					sty46-2	28	156.833
					sty46-2	28	189.18
					sty46-2	28	140.947
					sty46-2	28	157.187
					sty46-2	28	121.38
					sty46-2	28	184.223
					sty46-2	28	170.332
					sty46-2	28	156.209
					sty46-2	28	210.059
					sty46-2	28	211.433
					sty46-2	28	211.228
					sty46-2	28	218.523
					sty46-2	28	209.389
					sty46-2	28	213.801
					sty46-2	28	248.264
					sty46-2	28	177.913
					sty46-2	28	205.566
					sty46-2	28	243.046
					sty46-2	28	211.594
					sty46-2	28	138.708
					sty46-2	28	147.039
					sty46-2	28	92.466
					sty46-2	28	171.655
					sty46-2	28	140.131
					sty46-2	28	159.412
					sty46-2	28	179.622
					sty46-2	28	171.71
					sty46-2	28	162.445
					sty46-2	28	160.104
					sty46-2	28	151.106
					sty46-2	28	156.598
					sty46-2	28	168.682
					sty46-2	28	128.379
					sty46-2	28	221.876
					sty46-2	28	199.018
					sty46-2	28	169.333
					sty46-2	28	173.956
					sty46-2	28	175.179
					sty46-2	28	216.918
					sty46-2	28	262.505
					sty46-2	28	125.28
					sty46-2	28	158.245
					sty46-2	28	216.38
					sty46-2	28	199.074
					sty46-2	28	204.561
					sty46-2	28	197.867
					sty46-2	28	227.606
					sty46-2	28	243.668
					sty46-2	28	132.317
					sty46-2	28	181.052
					sty46-2	28	140.423
					sty46-2	28	196.913
					sty46-2	28	234.698
					sty46-2	28	136.479
					sty46-2	28	248.873
					sty46-2	28	113.745
					sty46-2	28	243.886
					sty46-2	28	133.365
					sty46-2	28	156.362
					sty46-2	28	151.254
					sty46-2	28	197.298
					sty46-2	28	221.982
					sty46-2	28	192.03
					sty46-2	28	294.957
					sty46-2	28	141.585
					sty46-2	28	139.047
					sty46-2	28	225.886
					sty46-2	28	123.008
					sty46-2	28	266.285
					sty46-2	28	247.643
					sty46-2	28	228.107
					sty46-2	28	248.862
					sty46-2	28	287.11
					sty46-2	28	161.173
					sty46-2	28	158.234
					sty46-2	28	210.879
					sty46-2	28	192.695
					sty46-2	28	249.522
					sty46-2	28	169.085
					sty46-2	28	256.266
					sty46-2	28	164.678
					sty46-2	28	125.364
					sty46-2	28	149.757
					sty46-2	28	191.942
					sty46-2	28	263.149
					sty46-2	28	202.506
					sty46-2	28	165.622
					sty46-2	28	235.271
					sty46-2	28	142.285
					sty46-2	28	233.518
					sty46-2	28	186.65
					sty46-2	28	224.29
					sty46-2	28	280.485
					sty46-2	28	297.597
					sty46-2	28	191.093
					sty46-2	28	248.711
					sty46-2	28	291.669
					sty46-2	28	196.991
					sty46-2	28	236.307
					sty46-2	28	259.715
					sty46-2	28	246.678
					sty46-2	28	261.279
					sty46-2	28	230.547
					sty46-2	28	213.397
					sty46-2	28	126.441
					sty46-2	28	205.827
					sty46-2	28	255.564
					sty46-2	28	195.548
					sty46-2	28	198.816
					sty46-2	28	177.581
					sty46-2	28	238.205
					sty46-2	28	200.785
					sty46-2	28	173.076
					sty46-2	28	178.633
					sty46-2	28	181.868
					sty46-2	28	152.608
					sty46-2	28	272.771
					sty46-2	28	228.907
					sty46-2	28	154.996
					sty46-2	28	186.178
					sty46-2	28	192.051
					sty46-2	28	218.297
					sty46-2	28	181.599
					sty46-2	28	202.186
					sty46-2	28	163.253
					sty46-2	28	230.23
					sty46-2	28	200.112
					sty46-2	28	176.312
					sty46-2	28	179.222
					sty46-2	28	207.078
					sty46-2	28	214.302
					sty46-2	28	209.176
					sty46-2	28	178.157
					sty46-2	28	201.1
					sty46-2	28	203.693
					sty46-2	28	177.574
					sty46-2	28	180.906
					sty46-2	28	190.7
					sty46-2	28	175.043
					sty46-2	28	232.36
					sty46-2	28	228.944
					sty46-2	28	164.708
					sty46-2	28	241.071
					One-way ANOVA
					Factor	Df	F value	p-value
					Genotype	9	12.34	< 2E-16
					Residuals	1573	—	—
					Tukey's multiple comparisons test
					Comparison	p-value
					acs6 28℃ vs acs6 22℃	6.12e-08
					Col-0 22℃ vs acs6 22℃	0.958304
					Col-0 28℃ vs acs6 22℃	0.99872
					mkk9-1 22℃ vs acs6 22℃	0.991311
					mkk9-1 28℃ vs acs6 22℃	0.201961
					mkk9-2 22℃ vs acs6 22℃	0.897463
					mkk9-2 28℃ vs acs6 22℃	0.987078
					sty46-1 22℃ vs acs6 22℃	0.948942
					sty46-1 28℃ vs acs6 22℃	1
					sty46-2 22℃ vs acs6 22℃	0
					sty46-2 28℃ vs acs6 22℃	3.22e-08
					Col-0 22℃ vs acs6 28℃	5.33e-08
					Col-0 28℃ vs acs6 28℃	0.000851
					mkk9-1 22℃ vs acs6 28℃	1.09e-06
					mkk9-1 28℃ vs acs6 28℃	0
					mkk9-2 22℃ vs acs6 28℃	0
					mkk9-2 28℃ vs acs6 28℃	1.84e-11
					sty46-1 22℃ vs acs6 28℃	0.266649
					sty46-1 28℃ vs acs6 28℃	0.124268
					sty46-2 22℃ vs acs6 28℃	0.00011
					sty46-2 28℃ vs acs6 28℃	0.0238951
					Col-0 28℃ vs Col-0 22℃	1
					mkk9-1 22℃ vs Col-0 22℃	1
					mkk9-1 28℃ vs Col-0 22℃	0.804289
					mkk9-2 22℃ vs Col-0 22℃	1
					mkk9-2 28℃ vs Col-0 22℃	0.443831
					sty46-1 22℃ vs Col-0 22℃	0.998141
					sty46-1 28℃ vs Col-0 22℃	0.414935
					sty46-2 22℃ vs Col-0 22℃	0.22623
					sty46-2 28℃ vs Col-0 22℃	0.993336
					mkk9-1 22℃ vs Col-0 28℃	0.576009
					mkk9-1 28℃ vs Col-0 28℃	0.999876
					mkk9-2 22℃ vs Col-0 28℃	0.222897
					mkk9-2 28℃ vs Col-0 28℃	0.0983421
					sty46-1 22℃ vs Col-0 28℃	0.956513
					sty46-1 28℃ vs Col-0 28℃	0.911202
					sty46-2 22℃ vs Col-0 28℃	0.000328
					sty46-2 28℃ vs Col-0 28℃	6.16e-05
					mkk9-1 28℃ vs mkk9-1 22℃	0.0297602
					mkk9-2 22℃ vs mkk9-1 22℃	0.0517727
					mkk9-2 28℃ vs mkk9-1 22℃	0.0170338
					sty46-1 22℃ vs mkk9-1 22℃	0.673173
					sty46-1 28℃ vs mkk9-1 22℃	1
					sty46-2 22℃ vs mkk9-1 22℃	0.920228
					sty46-2 28℃ vs mkk9-1 22℃	0.763484

## Sheet: Fig. S1
Fig. S1d Reverse transcription-quantitative polymerase chain reaction (RT-qPCR)
Gene	Genotype	Relative Expression	temperature			Student's t-test
KCS1	Col-0	0.47284	22				Df	t value	p-value
KCS1	Col-0	0.57044	22			Col-0 vs kcs 1/2/20	4	7.75257	0.00149165
KCS1	Col-0	0.575849	22			Col-0 vs kcs1-5	4	15.8856	9.17805e-05
KCS1	Col-0	0.535353	28
KCS1	Col-0	0.536058	28
KCS1	Col-0	0.582822	28
KCS1	kcs1/2/20	0.271313	22
KCS1	kcs1/2/20	0.269544	22
KCS1	kcs1/2/20	0.28795	22
KCS1	kcs1/2/20	0.23029	28
KCS1	kcs1/2/20	0.256888	28
KCS1	kcs1/2/20	0.404067	28
KCS1	kcs1-5	0.00549065	22
KCS1	kcs1-5	0.00900184	22
KCS1	kcs1-5	0.00861615	22
KCS1	kcs1-5	0.0063818	28
KCS1	kcs1-5	0.0116953	28
KCS1	kcs1-5	0.0062937	28

## Sheet: Fig. S2
Fig. S2 Reverse transcription-quantitative polymerase chain reaction (RT-qPCR)
Gene	Genotype	temperature	Relative Expression		One-way ANOVA
ZAT10	Col-0	22	0.415193		Factor	Df	F value	p-value
ZAT10	Col-0	22	0.175558		Genotype	7	10.43	4.5e-06
ZAT10	Col-0	22	0.232347		Residuals	25	—	—
ZAT10	Col-0	22	0.258586
ZAT10	Col-0	28	4.7093
ZAT10	Col-0	28	4.85442		Tukey's multiple comparisons test
ZAT10	Col-0	28	0.639774		Col-0 28℃ vs Col-0 22℃	0.493
ZAT10	Col-0	28	1.15782		zat10 22℃ vs Col-0 22℃	1
ZAT10	zat10	22	0.00129994		zat10 28℃ vs Col-0 22℃	1
ZAT10	zat10	22	9.06487e-05		ZAT10/zat10 #1 22℃ vs Col-0 22℃	0.999
ZAT10	zat10	22	0.00203475		ZAT10/zat10 #1 28℃ vs Col-0 22℃	0.242
ZAT10	zat10	22	0.00294803		ZAT10/zat10 #2 22℃ vs Col-0 22℃	1
ZAT10	zat10	28	0.000121648		ZAT10/zat10 #2 28℃ vs Col-0 22℃	4.37e-05
ZAT10	zat10	28	0.0023168		zat10 22℃ vs Col-0 28℃	0.373
ZAT10	zat10	28	0.000106232		zat10 28℃ vs Col-0 28℃	0.372
ZAT10	zat10	28	0.00305175		ZAT10/zat10 #1 22℃ vs Col-0 28℃	0.802
ZAT10	ZAT10/zat10 #1	22	0.852894		ZAT10/zat10 #1 28℃ vs Col-0 28℃	1
ZAT10	ZAT10/zat10 #1	22	0.880516		ZAT10/zat10 #2 22℃ vs Col-0 28℃	0.655
ZAT10	ZAT10/zat10 #1	22	0.891804		ZAT10/zat10 #2 28℃ vs Col-0 28℃	0.00586
ZAT10	ZAT10/zat10 #1	22	1.09732		zat10 28℃ vs zat10 22℃	1
ZAT10	ZAT10/zat10 #1	28	4.28263		ZAT10/zat10 #1 22℃ vs zat10 22℃	0.995
ZAT10	ZAT10/zat10 #1	28	6.41974		ZAT10/zat10 #1 28℃ vs zat10 22℃	0.167
ZAT10	ZAT10/zat10 #1	28	1.49832		ZAT10/zat10 #2 22℃ vs zat10 22℃	1
ZAT10	ZAT10/zat10 #1	28	1.65073		ZAT10/zat10 #2 28℃ vs zat10 22℃	2.65e-05
ZAT10	ZAT10/zat10 #2	22	0.525751		ZAT10/zat10 #1 22℃ vs zat10 28℃	0.995
ZAT10	ZAT10/zat10 #2	22	0.951721		ZAT10/zat10 #1 28℃ vs zat10 28℃	0.167
ZAT10	ZAT10/zat10 #2	22	0.58352		ZAT10/zat10 #2 22℃ vs zat10 28℃	1
ZAT10	ZAT10/zat10 #2	22	0.354391		ZAT10/zat10 #2 28℃ vs zat10 28℃	2.65e-05
ZAT10	ZAT10/zat10 #2	28	8.69262		ZAT10/zat10 #1 28℃ vs ZAT10/zat10 #1 22℃	0.511
ZAT10	ZAT10/zat10 #2	28	4.53715		ZAT10/zat10 #2 22℃ vs ZAT10/zat10 #1 22℃	1
ZAT10	ZAT10/zat10 #2	28	6.24199		ZAT10/zat10 #2 28℃ vs ZAT10/zat10 #1 22℃	0.000152
ZAT10	ZAT10/zat10 #2	28	13.5489		ZAT10/zat10 #2 22℃ vs ZAT10/zat10 #1 28℃	0.364
					ZAT10/zat10 #2 28℃ vs ZAT10/zat10 #1 28℃	0.0185
					ZAT10/zat10 #2 28℃ vs ZAT10/zat10 #2 22℃	8.19e-05

## Sheet: Fig.S3
Fig. S3 Expression levels of ZAT10 target genes
Genotype	temperature	AT2G40140 (CZF1)	AT2G41010 (CAMBP25)	AT3G55980 (SZF1)	AT4G22780 (ACR7)	AT4G38470 (STY46)	AT3G07930	AT4G02600 (MLO1)	AT4G33980 (AT4G33980)	AT5G47070	AT1G32640 (MYC2)	AT1G58340 (ZF14)	AT2G27690 (CYP94C1)	AT3G61060 (PP2-A13)	AT1G18740 (AT1G18740)	AT1G30270 (CIPK23)
Col-0	22	96.8478	10.3685	16.3041	9.9177	226.68	5.10912	32.5331	5.63506	5.10912	73.3309	10.5188	1.12701	54.9981	18.9338	162.29
Col-0	22	97.9674	9.05457	18.3318	10.91	187.919	6.6796	34.5113	6.01164	6.01164	63.6788	10.9842	1.11327	40.0776	19.8904	170.552
Col-0	22	98.8109	8.56207	18.9754	11.1847	185.126	5.09096	39.2621	5.70805	4.85955	72.4305	6.32513	1.00277	43.196	22.4465	176.795
Col-0	28	140.905	16.3806	71.0886	18.6866	407.13	7.79271	60.9899	23.8552	6.75899	161.341	31.0118	2.54456	91.6041	37.2142	271.87
Col-0	28	152.077	22.5333	116.975	19.3014	354.966	10.5036	56.4678	24.4185	10.8626	173.264	29.9845	4.75802	84.567	47.67	286.379
Col-0	28	202.188	22.6729	126.272	22.2483	357.672	10.1901	58.8477	29.0417	10.3599	122.706	22.2483	3.65144	90.1822	29.4663	298.145
kcs1/2/20	22	112.201	13.2644	23.1737	11.6258	241.802	6.24207	33.7072	13.9666	5.38378	59.0655	6.00799	2.18472	44.3187	20.6768	162.138
kcs1/2/20	22	105.977	13.3527	19.691	13.1837	231.391	5.83125	31.6916	12.5921	5.07066	68.8764	7.43696	1.77473	40.0582	18.0008	171.642
kcs1/2/20	22	106.532	12.0678	19.5802	15.7441	247.589	7.03288	36.4431	14.2256	5.67425	65.6935	6.87304	1.35862	46.9924	16.0637	178.459
kcs1/2/20	28	97.1876	14.004	33.2361	14.8442	228.078	7.18871	44.2526	12.6969	5.97503	100.549	12.6036	1.77384	44.9995	22.6864	193.535
kcs1/2/20	28	103.934	12.7712	37.3894	15.2918	251.307	6.88973	47.6399	10.2506	4.62116	106.287	13.3593	2.01651	54.2776	20.3331	205.936
kcs1/2/20	28	90.627	15.2753	39.2127	16.5792	251.669	6.33364	51.5074	15.8341	5.49537	112.795	16.2998	1.86284	61.1942	23.006	240.958

## Sheet: Fig.S4
Fig. S4 Reverse transcription-quantitative polymerase chain reaction (RT-qPCR)
Gene	Relative Expression	Genotype	temperature			Gene	Relative Expression	Genotype	temperature			Gene	Relative Expression	Genotype	temperature
MKK9	0.335381	Col-0	22			STY46	0.0249432	Col-0	22			ACS6	0.437077	Col-0	22
MKK9	0.223011	Col-0	22			STY46	0.0211807	Col-0	22			ACS6	0.26796	Col-0	22
MKK9	0.338825	Col-0	22			STY46	0.0397808	Col-0	22			ACS6	0.888603	Col-0	22
MKK9	0.358743	Col-0	22			STY46	0.0345444	Col-0	22			ACS6	0.630915	Col-0	22
MKK9	0.59042	Col-0	28			STY46	0.576613	Col-0	28			ACS6	0.218537	Col-0	28
MKK9	0.687651	Col-0	28			STY46	0.611489	Col-0	28			ACS6	0.273606	Col-0	28
MKK9	0.404676	Col-0	28			STY46	0.795217	Col-0	28			ACS6	0.270026	Col-0	28
MKK9	0.418776	Col-0	28			STY46	0.529476	Col-0	28			ACS6	0.329468	Col-0	28
MKK9	0.276677	zat10	22			STY46	0.0204136	zat10	22			ACS6	0.322855	zat10	22
MKK9	0.303052	zat10	22			STY46	0.0276805	zat10	22			ACS6	0.158649	zat10	22
MKK9	0.339317	zat10	22			STY46	0.0282691	zat10	22			ACS6	0.266803	zat10	22
MKK9	0.346486	zat10	22			STY46	0.0320821	zat10	22			ACS6	0.235945	zat10	22
MKK9	0.280913	zat10	28			STY46	0.0361605	zat10	28			ACS6	0.512425	zat10	28
MKK9	0.177695	zat10	28			STY46	0.0182179	zat10	28			ACS6	0.30991	zat10	28
MKK9	0.304297	zat10	28			STY46	0.0299435	zat10	28			ACS6	0.598445	zat10	28
MKK9	0.26453	zat10	28			STY46	0.0266937	zat10	28			ACS6	0.386415	zat10	28
MKK9	0.271619	ZAT10/zat10 #1	22			STY46	0.0243126	ZAT10/zat10 #1	22			ACS6	0.915377	ZAT10/zat10 #1	22
MKK9	0.219574	ZAT10/zat10 #1	22			STY46	0.509012	ZAT10/zat10 #1	22			ACS6	0.600221	ZAT10/zat10 #1	22
MKK9	0.316742	ZAT10/zat10 #1	22			STY46	0.57202	ZAT10/zat10 #1	22			ACS6	0.442004	ZAT10/zat10 #1	22
MKK9	0.317131	ZAT10/zat10 #1	22			STY46	0.0250964	ZAT10/zat10 #1	22			ACS6	0.429866	ZAT10/zat10 #1	22
MKK9	0.584525	ZAT10/zat10 #1	28			STY46	0.0231935	ZAT10/zat10 #1	28			ACS6	0.653674	ZAT10/zat10 #1	28
MKK9	0.691507	ZAT10/zat10 #1	28			STY46	0.0255928	ZAT10/zat10 #1	28			ACS6	0.794016	ZAT10/zat10 #1	28
MKK9	0.666095	ZAT10/zat10 #1	28			STY46	0.0234326	ZAT10/zat10 #1	28			ACS6	0.446434	ZAT10/zat10 #1	28
MKK9	0.342612	ZAT10/zat10 #1	28			STY46	0.0267551	ZAT10/zat10 #1	28			ACS6	0.552591	ZAT10/zat10 #1	28
MKK9	0.211634	ZAT10/zat10 #2	22			STY46	0.0238454	ZAT10/zat10 #2	22			ACS6	0.790329	ZAT10/zat10 #2	22
MKK9	0.232465	ZAT10/zat10 #2	22			STY46	0.0281692	ZAT10/zat10 #2	22			ACS6	0.770131	ZAT10/zat10 #2	22
MKK9	0.260613	ZAT10/zat10 #2	22			STY46	0.0226148	ZAT10/zat10 #2	22			ACS6	0.205282	ZAT10/zat10 #2	22
MKK9	0.432729	ZAT10/zat10 #2	22			STY46	0.0196232	ZAT10/zat10 #2	22			ACS6	0.228394	ZAT10/zat10 #2	22
MKK9	0.440013	ZAT10/zat10 #2	28			STY46	0.697383	ZAT10/zat10 #2	28			ACS6	0.208001	ZAT10/zat10 #2	28
MKK9	0.372756	ZAT10/zat10 #2	28			STY46	0.782442	ZAT10/zat10 #2	28			ACS6	0.254324	ZAT10/zat10 #2	28
MKK9	0.593437	ZAT10/zat10 #2	28			STY46	0.0337713	ZAT10/zat10 #2	28			ACS6	0.200747	ZAT10/zat10 #2	28
MKK9	0.509968	ZAT10/zat10 #2	28			STY46	0.0425574	ZAT10/zat10 #2	28			ACS6	0.17071	ZAT10/zat10 #2	28
MKK9						STY46						ACS6
One-way ANOVA						One-way ANOVA						One-way ANOVA
Factor	Df	F value	p-value			Factor	Df	F value	p-value			Factor	Df	F value	p-value
Genotype	7	6.855	0.000159			Genotype	7	6.363	0.00027			Genotype	7	16.47	9.34e-08
Residuals	24	—	—			Residuals	24	—	—			Residuals	24	—	—
Tukey's multiple comparisons test						Tukey's multiple comparisons test						Tukey's multiple comparisons test
Comparison	p-value					Comparison	p-value					Comparison	p-value
Col-0 28℃ vs Col-0 22℃	0.0746317					Col-0 28℃ vs Col-0 22℃	0.00235396					Col-0 28℃ vs Col-0 22℃	0.00279668
zat10 22℃ vs Col-0 22℃	1					zat10 22℃ vs Col-0 22℃	1					zat10 22℃ vs Col-0 22℃	0.499665
zat10 28℃ vs Col-0 22℃	0.988368					zat10 28℃ vs Col-0 22℃	1					zat10 28℃ vs Col-0 22℃	0.539088
ZAT10/zat10 #1 22℃ vs Col-0 22℃	0.999642					ZAT10/zat10 #1 22℃ vs Col-0 22℃	1					ZAT10/zat10 #1 22℃ vs Col-0 22℃	0.855702
ZAT10/zat10 #1 28℃ vs Col-0 22℃	0.0167569					ZAT10/zat10 #1 28℃ vs Col-0 22℃	0.529248					ZAT10/zat10 #1 28℃ vs Col-0 22℃	0.954669
ZAT10/zat10 #2 22℃ vs Col-0 22℃	0.999814					ZAT10/zat10 #2 22℃ vs Col-0 22℃	1					ZAT10/zat10 #2 22℃ vs Col-0 22℃	0.595947
ZAT10/zat10 #2 28℃ vs Col-0 22℃	0.268519					ZAT10/zat10 #2 28℃ vs Col-0 22℃	0.149014					ZAT10/zat10 #2 28℃ vs Col-0 22℃	0.00117192
zat10 22℃ vs Col-0 28℃	0.0802832					zat10 22℃ vs Col-0 28℃	0.00222464					zat10 22℃ vs Col-0 28℃	2.16259e-05
zat10 28℃ vs Col-0 28℃	0.0113388					zat10 28℃ vs Col-0 28℃	0.00225173					zat10 28℃ vs Col-0 28℃	2.518e-05
ZAT10/zat10 #1 22℃ vs Col-0 28℃	0.0260806					ZAT10/zat10 #1 22℃ vs Col-0 28℃	0.00210325					ZAT10/zat10 #1 22℃ vs Col-0 28℃	9.53641e-05
ZAT10/zat10 #1 28℃ vs Col-0 28℃	0.996914					ZAT10/zat10 #1 28℃ vs Col-0 28℃	0.181694					ZAT10/zat10 #1 28℃ vs Col-0 28℃	0.0354691
ZAT10/zat10 #2 22℃ vs Col-0 28℃	0.0289117					ZAT10/zat10 #2 22℃ vs Col-0 28℃	0.00208079					ZAT10/zat10 #2 22℃ vs Col-0 28℃	3.12889e-05
ZAT10/zat10 #2 28℃ vs Col-0 28℃	0.996685					ZAT10/zat10 #2 28℃ vs Col-0 28℃	0.596173					ZAT10/zat10 #2 28℃ vs Col-0 28℃	0.999953
zat10 28℃ vs zat10 22℃	0.985275					zat10 28℃ vs zat10 22℃	1					zat10 28℃ vs zat10 22℃	1
ZAT10/zat10 #1 22℃ vs zat10 22℃	0.999431					ZAT10/zat10 #1 22℃ vs zat10 22℃	1					ZAT10/zat10 #1 22℃ vs zat10 22℃	0.99821
ZAT10/zat10 #1 28℃ vs zat10 22℃	0.0181832					ZAT10/zat10 #1 28℃ vs zat10 22℃	0.515005					ZAT10/zat10 #1 28℃ vs zat10 22℃	0.080554
ZAT10/zat10 #2 22℃ vs zat10 22℃	0.999689					ZAT10/zat10 #2 22℃ vs zat10 22℃	1					ZAT10/zat10 #2 22℃ vs zat10 22℃	1
ZAT10/zat10 #2 28℃ vs zat10 22℃	0.28428					ZAT10/zat10 #2 28℃ vs zat10 22℃	0.142647					ZAT10/zat10 #2 28℃ vs zat10 22℃	9.37733e-06
ZAT10/zat10 #1 22℃ vs zat10 28℃	0.999949					ZAT10/zat10 #1 22℃ vs zat10 28℃	1					ZAT10/zat10 #1 22℃ vs zat10 28℃	0.999109
ZAT10/zat10 #1 28℃ vs zat10 28℃	0.00223126					ZAT10/zat10 #1 28℃ vs zat10 28℃	0.518047					ZAT10/zat10 #1 28℃ vs zat10 28℃	0.0918328
ZAT10/zat10 #2 22℃ vs zat10 28℃	0.999887					ZAT10/zat10 #2 22℃ vs zat10 28℃	1					ZAT10/zat10 #2 22℃ vs zat10 28℃	1
ZAT10/zat10 #2 28℃ vs zat10 28℃	0.053308					ZAT10/zat10 #2 28℃ vs zat10 28℃	0.143991					ZAT10/zat10 #2 28℃ vs zat10 28℃	1.08923e-05
ZAT10/zat10 #1 28℃ vs ZAT10/zat10 #1 22℃	0.00534424					ZAT10/zat10 #1 28℃ vs ZAT10/zat10 #1 22℃	0.500962					ZAT10/zat10 #1 28℃ vs ZAT10/zat10 #1 22℃	0.256765
ZAT10/zat10 #2 22℃ vs ZAT10/zat10 #1 22℃	1					ZAT10/zat10 #2 22℃ vs ZAT10/zat10 #1 22℃	1					ZAT10/zat10 #2 22℃ vs ZAT10/zat10 #1 22℃	0.999725
ZAT10/zat10 #2 28℃ vs ZAT10/zat10 #1 22℃	0.112067					ZAT10/zat10 #2 28℃ vs ZAT10/zat10 #1 22℃	0.13655					ZAT10/zat10 #2 28℃ vs ZAT10/zat10 #1 22℃	4.04961e-05
ZAT10/zat10 #2 22℃ vs ZAT10/zat10 #1 28℃	0.00596396					ZAT10/zat10 #2 22℃ vs ZAT10/zat10 #1 28℃	0.498287					ZAT10/zat10 #2 22℃ vs ZAT10/zat10 #1 28℃	0.110237
ZAT10/zat10 #2 28℃ vs ZAT10/zat10 #1 28℃	0.865526					ZAT10/zat10 #2 28℃ vs ZAT10/zat10 #1 28℃	0.990327					ZAT10/zat10 #2 28℃ vs ZAT10/zat10 #1 28℃	0.0157846
ZAT10/zat10 #2 28℃ vs ZAT10/zat10 #2 22℃	0.122531					ZAT10/zat10 #2 28℃ vs ZAT10/zat10 #2 22℃	0.135409					ZAT10/zat10 #2 28℃ vs ZAT10/zat10 #2 22℃	1.34897e-05

[truncated: 1 more sheets: Fig.S5]
