# Supplementary material for: ZAT10 regulates root thermomorphogenesis via very-long-chain fatty acids signaling
Source: Research Square preprint supplement (doi:10.21203/rs.3.rs-7128687/v1), 2025-07-23
Supplement: Supplementary file 5 [file 5f3ece21493ec01920995c1c.xlsx]

## Sheet: 250618_Dataset_S4_MYC2_chipseq
Dataset S4. List of genes bound by MYC2 within 1,000 bp upstream of the translation start site.
Unnamed: 0	seqnames	start	end	width	strand	score	signalValue	pValue	qValue	peak	feature	start_position	end_position	feature_strand	insideFeature	distancetoFeature	shortestDistance	fromOverlappingOrNearest
MYC2_2.AT1G01010	chr1	3032	3403	372	*	42	2.85331	4.2239	2.70893	MYC2_2	AT1G01010	3631	5899	+	upstream	-599	228	Upstream
MYC2_3.AT1G01030	chr1	13198	14530	1333	*	289	8.76373	28.9902	26.7052	MYC2_3	AT1G01030	11649	13714	-	overlapStart	516	516	Upstream
MYC2_9.AT1G01060	chr1	37819	38033	215	*	36	2.48583	3.61458	2.18433	MYC2_9	AT1G01060	33379	37871	-	overlapStart	52	52	Upstream
MYC2_10.AT1G01090	chr1	49745	50257	513	*	60	3.44269	6.03609	4.41582	MYC2_10	AT1G01090	47485	49286	-	upstream	-459	459	Upstream
MYC2_11.AT1G01100	chr1	51105	52118	1014	*	248	7.9485	24.8816	22.6611	MYC2_11	AT1G01100	50075	51199	-	overlapStart	94	94	Upstream
MYC2_11.AT1G01110	chr1	51105	52118	1014	*	248	7.9485	24.8816	22.6611	MYC2_11	AT1G01110	52239	54692	+	upstream	-1134	121	Upstream
MYC2_12.AT1G01115	chr1	55420	55976	557	*	1057	21.0282	105.712	102.605	MYC2_12	AT1G01115	56624	56740	+	upstream	-1204	648	Upstream
MYC2_13.AT1G01115	chr1	56434	57627	1194	*	181	6.52185	18.1248	16.038	MYC2_13	AT1G01115	56624	56740	+	includeFeature	-190	190	Upstream
MYC2_14.AT1G01120	chr1	59133	60830	1698	*	120	5.09519	12.0221	10.1079	MYC2_14	AT1G01120	57269	59167	-	overlapStart	34	34	Upstream
MYC2_17.AT1G01130	chr1	63905	64442	538	*	47	3.02692	4.7555	3.22478	MYC2_17	AT1G01130	61905	63811	-	upstream	-94	94	Upstream
MYC2_18.AT1G01140	chr1	67655	67865	211	*	48	3.05712	4.81704	3.25478	MYC2_18	AT1G01140	64166	67625	-	upstream	-30	30	Upstream
MYC2_19.AT1G01140	chr1	68347	69188	842	*	209	7.13327	20.9482	18.8004	MYC2_19	AT1G01140	64166	67625	-	upstream	-722	722	Upstream
MYC2_20.AT1G01170	chr1	75253	75625	373	*	74	3.87235	7.44433	5.72108	MYC2_20	AT1G01170	73931	74737	-	upstream	-516	516	Upstream
MYC2_20.AT1G01180	chr1	75253	75625	373	*	74	3.87235	7.44433	5.72108	MYC2_20	AT1G01180	75583	76758	+	overlapStart	-330	42	Upstream
MYC2_21.AT1G01200	chr1	88495	88778	284	*	67	3.66854	6.75201	5.06605	MYC2_21	AT1G01200	86515	88213	-	upstream	-282	282	Upstream
MYC2_21.AT1G01210	chr1	88495	88778	284	*	67	3.66854	6.75201	5.06605	MYC2_21	AT1G01210	88898	89745	+	upstream	-403	120	Upstream
MYC2_22.AT1G01230	chr1	97301	97519	219	*	34	2.49713	3.49926	2.07356	MYC2_22	AT1G01230	97456	99240	+	overlapStart	-155	63	Upstream
MYC2_23.AT1G01240	chr1	99244	99986	743	*	81	4.07615	8.15838	6.39981	MYC2_23	AT1G01240	99894	101834	+	overlapStart	-650	92	Upstream
MYC2_26.AT1G01260	chr1	107541	109322	1782	*	2458	39.1441	245.806	240.878	MYC2_26	AT1G01260	108946	111609	+	overlapStart	-1405	376	Upstream
MYC2_27.AT1G01300	chr1	116009	117066	1058	*	422	11.2094	42.2201	39.7773	MYC2_27	AT1G01300	116943	118764	+	overlapStart	-934	123	Upstream
MYC2_29.AT1G01305	chr1	118200	118887	688	*	181	6.52185	18.1248	16.038	MYC2_29	AT1G01305	119397	119997	+	upstream	-1197	510	Upstream
MYC2_32.AT1G01320	chr1	130877	131348	472	*	190	6.72566	19.0532	16.9457	MYC2_32	AT1G01320	121067	130577	-	upstream	-300	300	Upstream
MYC2_33.AT1G01340	chr1	135898	136130	233	*	25	2.13294	2.52391	1.21903	MYC2_33	AT1G01340	132328	135831	-	upstream	-67	67	Upstream
MYC2_33.AT1G01350	chr1	135898	136130	233	*	25	2.13294	2.52391	1.21903	MYC2_33	AT1G01350	136124	138162	+	overlapStart	-226	6	Upstream
MYC2_35.AT1G01380	chr1	145797	146540	744	*	67	3.66854	6.75201	5.06605	MYC2_35	AT1G01380	147153	147942	+	upstream	-1356	613	Upstream
MYC2_37.AT1G01420	chr1	155455	157059	1605	*	139	5.44133	13.925	11.9547	MYC2_37	AT1G01420	154492	156011	-	overlapStart	556	556	Upstream
MYC2_38.AT1G01430	chr1	158545	158915	371	*	130	5.24956	13.099	11.1549	MYC2_38	AT1G01430	156801	158655	-	overlapStart	110	110	Upstream
MYC2_39.AT1G01430	chr1	159090	159651	562	*	298	8.68584	29.8953	27.6048	MYC2_39	AT1G01430	156801	158655	-	upstream	-435	435	Upstream
MYC2_40.AT1G01440	chr1	163339	163530	192	*	39	2.73798	3.9925	2.51765	MYC2_40	AT1G01440	159856	162572	-	upstream	-767	767	Upstream
MYC2_40.AT1G01448	chr1	163339	163530	192	*	39	2.73798	3.9925	2.51765	MYC2_40	AT1G01448	163419	166239	+	overlapStart	-80	80	Upstream
MYC2_41.AT1G01470	chr1	173032	174040	1009	*	116	4.40833	11.6317	9.74076	MYC2_41	AT1G01470	172146	172948	-	upstream	-84	84	Upstream
MYC2_41.AT1G01471	chr1	173032	174040	1009	*	116	4.40833	11.6317	9.74076	MYC2_41	AT1G01471	173251	173466	+	includeFeature	-219	219	Upstream
MYC2_42.AT1G01480	chr1	174753	175110	358	*	48	3.05712	4.81704	3.25478	MYC2_42	AT1G01480	175782	178400	+	upstream	-1029	672	Upstream
MYC2_43.AT1G01480	chr1	175262	175480	219	*	54	3.26092	5.43708	3.83145	MYC2_43	AT1G01480	175782	178400	+	upstream	-520	302	Upstream
MYC2_48.AT1G01490	chr1	180953	182743	1791	*	172	6.31804	17.2096	15.1446	MYC2_48	AT1G01490	180059	182358	-	overlapStart	1405	385	Upstream
MYC2_49.AT1G01490	chr1	182932	183732	801	*	541	13.2475	54.1196	51.5737	MYC2_49	AT1G01490	180059	182358	-	upstream	-574	574	Upstream
MYC2_50.AT1G01500	chr1	184208	185232	1025	*	74	3.87235	7.44433	5.72108	MYC2_50	AT1G01500	185133	186923	+	overlapStart	-925	99	Upstream
MYC2_51.AT1G01510	chr1	186880	187115	236	*	32	2.43854	3.2439	1.82846	MYC2_51	AT1G01510	187211	190056	+	upstream	-331	96	Upstream
MYC2_52.AT1G01540	chr1	194754	195235	482	*	120	5.09519	12.0221	10.1079	MYC2_52	AT1G01540	195780	198684	+	upstream	-1026	545	Upstream
MYC2_53.AT1G01540	chr1	195579	195860	282	*	81	3.45246	8.13393	6.39791	MYC2_53	AT1G01540	195780	198684	+	overlapStart	-201	80	Upstream
MYC2_54.AT1G01550	chr1	198382	199957	1576	*	341	9.24871	34.1545	31.8073	MYC2_54	AT1G01550	199639	201775	+	overlapStart	-1257	318	Upstream
MYC2_55.AT1G01560	chr1	201690	202071	382	*	69	3.66736	6.99632	5.30579	MYC2_55	AT1G01560	202136	204335	+	upstream	-446	65	Upstream
MYC2_56.AT1G01570	chr1	204718	205226	509	*	20	1.90903	2.00568	0.776836	MYC2_56	AT1G01570	205176	207435	+	overlapStart	-458	50	Upstream
MYC2_60.AT1G01600	chr1	218645	219044	400	*	48	3.05712	4.81704	3.25478	MYC2_60	AT1G01600	218994	221286	+	overlapStart	-349	50	Upstream
MYC2_62.AT1G01610	chr1	224450	225033	584	*	67	3.66854	6.75201	5.06605	MYC2_62	AT1G01610	221691	224340	-	upstream	-110	110	Upstream
MYC2_64.AT1G01620	chr1	227555	228623	1069	*	85	4.1324	8.56499	6.8003	MYC2_64	AT1G01620	225665	227302	-	upstream	-253	253	Upstream
MYC2_64.AT1G01630	chr1	227555	228623	1069	*	85	4.1324	8.56499	6.8003	MYC2_64	AT1G01630	229013	230917	+	upstream	-1458	390	Upstream
MYC2_65.AT1G01640	chr1	232938	233122	185	*	28	2.31511	2.87628	1.51509	MYC2_65	AT1G01640	230994	232508	-	upstream	-430	430	Upstream
MYC2_66.AT1G01650	chr1	237609	238276	668	*	419	10.6272	41.9977	39.5629	MYC2_66	AT1G01650	232841	237817	-	overlapStart	208	208	Upstream
MYC2_71.AT1G01700	chr1	262473	262931	459	*	95	4.4575	9.58917	7.78579	MYC2_71	AT1G01700	259495	261474	-	upstream	-999	999	Upstream
MYC2_71.AT1G01710	chr1	262473	262931	459	*	95	4.4575	9.58917	7.78579	MYC2_71	AT1G01710	262828	267771	+	overlapStart	-355	103	Upstream
MYC2_72.AT1G01720	chr1	267910	268509	600	*	200	6.42128	20.0704	17.9418	MYC2_72	AT1G01720	268330	269819	+	overlapStart	-420	179	Upstream
MYC2_74.AT1G01730	chr1	270096	270617	522	*	54	3.15186	5.41187	3.83145	MYC2_74	AT1G01730	270956	272061	+	upstream	-860	339	Upstream
MYC2_76.AT1G01800	chr1	292848	293504	657	*	396	10.2019	39.6336	37.2224	MYC2_76	AT1G01800	293342	295040	+	overlapStart	-494	162	Upstream
MYC2_78.AT1G01820	chr1	298024	298208	185	*	29	2.35607	2.95471	1.59004	MYC2_78	AT1G01820	296001	298120	-	overlapStart	96	88	Upstream
MYC2_80.AT1G01830	chr1	302792	303086	295	*	65	3.56389	6.52743	4.87168	MYC2_80	AT1G01830	298535	302315	-	upstream	-477	477	Upstream
MYC2_80.AT1G01840	chr1	302792	303086	295	*	65	3.56389	6.52743	4.87168	MYC2_80	AT1G01840	303537	304358	+	upstream	-745	451	Upstream
MYC2_81.AT1G01830	chr1	303276	303460	185	*	29	2.3503	2.94367	1.57926	MYC2_81	AT1G01830	298535	302315	-	upstream	-961	961	Upstream
MYC2_81.AT1G01840	chr1	303276	303460	185	*	29	2.3503	2.94367	1.57926	MYC2_81	AT1G01840	303537	304358	+	upstream	-261	77	Upstream
MYC2_82.AT1G01880	chr1	309246	309576	331	*	33	2.42967	3.3587	1.939	MYC2_82	AT1G01880	306480	309109	-	upstream	-137	137	Upstream
MYC2_82.AT1G01890	chr1	309246	309576	331	*	33	2.42967	3.3587	1.939	MYC2_82	AT1G01890	309275	309347	-	includeFeature	101	29	Upstream
MYC2_82.AT1G01900	chr1	309246	309576	331	*	33	2.42967	3.3587	1.939	MYC2_82	AT1G01900	310316	313130	+	upstream	-1070	740	Upstream
MYC2_83.AT1G01950	chr1	324926	325334	409	*	62	3.34563	6.27026	4.62022	MYC2_83	AT1G01950	325379	330619	+	upstream	-453	45	Upstream
MYC2_84.AT1G01980	chr1	342262	342784	523	*	66	3.61223	6.63152	4.97323	MYC2_84	AT1G01980	340172	341999	-	upstream	-263	263	Upstream
MYC2_86.AT1G02060	chr1	363457	363645	189	*	34	2.51898	3.40341	1.98236	MYC2_86	AT1G02060	360918	363094	-	upstream	-363	363	Upstream
MYC2_87.AT1G02060	chr1	364042	364493	452	*	170	6.23046	17.0029	14.9546	MYC2_87	AT1G02060	360918	363094	-	upstream	-948	948	Upstream
MYC2_87.AT1G02065	chr1	364042	364493	452	*	170	6.23046	17.0029	14.9546	MYC2_87	AT1G02065	365209	367340	+	upstream	-1167	716	Upstream
MYC2_90.AT1G02080	chr1	372607	372808	202	*	31	2.44569	3.12521	1.71436	MYC2_90	AT1G02080	373335	386847	+	upstream	-728	527	Upstream
MYC2_93.AT1G02180	chr1	414495	415150	656	*	83	3.72533	8.39196	6.62989	MYC2_93	AT1G02180	413522	414645	-	overlapStart	150	150	Upstream
MYC2_93.AT1G02190	chr1	414495	415150	656	*	83	3.72533	8.39196	6.62989	MYC2_93	AT1G02190	415079	418010	+	overlapStart	-584	71	Upstream
MYC2_94.AT1G02205	chr1	418095	418279	185	*	21	2.00684	2.18872	0.902263	MYC2_94	AT1G02205	418748	422438	+	upstream	-653	469	Upstream
MYC2_97.AT1G02210	chr1	428337	428612	276	*	42	2.85331	4.2239	2.70893	MYC2_97	AT1G02210	427548	427811	-	upstream	-526	526	Upstream
MYC2_98.AT1G02220	chr1	430993	431229	237	*	50	3.07345	5.04448	3.47673	MYC2_98	AT1G02220	428814	430647	-	upstream	-346	346	Upstream
MYC2_99.AT1G02228	chr1	434258	434452	195	*	36	2.6495	3.65933	2.19401	MYC2_99	AT1G02228	433031	433819	-	upstream	-439	439	Upstream
MYC2_100.AT1G02228	chr1	434565	434839	275	*	36	2.6495	3.65933	2.19401	MYC2_100	AT1G02228	433031	433819	-	upstream	-746	746	Upstream
MYC2_101.AT1G02230	chr1	436997	437215	219	*	60	3.46473	6.08252	4.43613	MYC2_101	AT1G02230	435174	436776	-	upstream	-221	221	Upstream
MYC2_102.AT1G02250	chr1	439839	440123	285	*	54	3.25835	5.43174	3.83145	MYC2_102	AT1G02250	437951	439559	-	upstream	-280	280	Upstream
MYC2_104.AT1G02290	chr1	452796	453186	391	*	22	2.01882	2.21108	0.92402	MYC2_104	AT1G02290	450527	452737	-	upstream	-59	59	Upstream
MYC2_104.AT1G02300	chr1	452796	453186	391	*	22	2.01882	2.21108	0.92402	MYC2_104	AT1G02300	453288	455463	+	upstream	-492	102	Upstream
MYC2_106.AT1G02310	chr1	461634	461929	296	*	53	2.94922	5.33343	3.75794	MYC2_106	AT1G02310	458133	460696	-	upstream	-938	938	Upstream
MYC2_106.AT1G02320	chr1	461634	461929	296	*	53	2.94922	5.33343	3.75794	MYC2_106	AT1G02320	461828	461974	+	overlapStart	-194	45	Upstream
MYC2_108.AT1G02340	chr1	467760	467967	208	*	48	3.05712	4.81704	3.25478	MYC2_108	AT1G02340	465718	467844	-	overlapStart	84	84	Upstream
MYC2_109.AT1G02340	chr1	468721	469698	978	*	219	7.33708	21.9141	19.747	MYC2_109	AT1G02340	465718	467844	-	upstream	-877	877	Upstream
MYC2_109.AT1G02350	chr1	468721	469698	978	*	219	7.33708	21.9141	19.747	MYC2_109	AT1G02350	469818	470693	+	upstream	-1097	120	Upstream
MYC2_111.AT1G02380	chr1	476930	477132	203	*	60	3.46473	6.08252	4.43613	MYC2_111	AT1G02380	477000	478971	+	overlapStart	-70	70	Upstream
MYC2_112.AT1G02391	chr1	483325	484019	695	*	96	4.48377	9.64772	7.82338	MYC2_112	AT1G02391	483764	483919	-	includeFeature	594	100	Upstream
MYC2_113.AT1G02391	chr1	484221	484644	424	*	31	2.44569	3.12521	1.71436	MYC2_113	AT1G02391	483764	483919	-	upstream	-302	302	Upstream
MYC2_115.AT1G02400	chr1	485584	486027	444	*	256	7.65031	25.6556	23.4306	MYC2_115	AT1G02400	486801	489577	+	upstream	-1217	774	Upstream
MYC2_118.AT1G02405	chr1	490565	490990	426	*	52	3.18845	5.28634	3.7127	MYC2_118	AT1G02405	489979	490505	-	upstream	-60	60	Upstream
MYC2_118.AT1G02410	chr1	490565	490990	426	*	52	3.18845	5.28634	3.7127	MYC2_118	AT1G02410	490925	492926	+	overlapStart	-360	65	Upstream
MYC2_119.AT1G02430	chr1	496087	496271	185	*	39	2.72863	3.9736	2.49904	MYC2_119	AT1G02430	495050	496062	-	upstream	-25	25	Upstream
MYC2_120.AT1G02450	chr1	498817	499314	498	*	154	5.91042	15.4207	13.4024	MYC2_120	AT1G02450	497976	498516	-	upstream	-301	301	Upstream
MYC2_123.AT1G02460	chr1	508046	508279	234	*	17	1.83427	1.72792	0.517312	MYC2_123	AT1G02460	504673	507204	-	upstream	-842	842	Upstream
MYC2_125.AT1G02500	chr1	517519	518413	895	*	92	4.28785	9.20691	7.41075	MYC2_125	AT1G02500	518251	520437	+	overlapStart	-732	162	Upstream
MYC2_126.AT1G02510	chr1	521832	522258	427	*	54	3.26092	5.43708	3.83145	MYC2_126	AT1G02510	520498	521668	-	upstream	-164	164	Upstream
MYC2_127.AT1G02530	chr1	528909	529130	222	*	35	2.61409	3.59025	2.16187	MYC2_127	AT1G02530	529795	534677	+	upstream	-886	665	Upstream
MYC2_128.AT1G02560	chr1	537512	537994	483	*	787	16.0292	78.7984	76.0389	MYC2_128	AT1G02560	537860	540109	+	overlapStart	-348	134	Upstream
MYC2_129.AT1G02580	chr1	543797	544104	308	*	422	11.2094	42.2201	39.7773	MYC2_129	AT1G02580	544783	549202	+	upstream	-986	679	Upstream
MYC2_130.AT1G02580	chr1	544416	544823	408	*	36	2.6495	3.65933	2.19401	MYC2_130	AT1G02580	544783	549202	+	overlapStart	-367	40	Upstream
MYC2_132.AT1G02610	chr1	556366	556782	417	*	54	3.26092	5.43708	3.83145	MYC2_132	AT1G02610	553050	555994	-	upstream	-372	372	Upstream
MYC2_132.AT1G02620	chr1	556366	556782	417	*	54	3.26092	5.43708	3.83145	MYC2_132	AT1G02620	557092	557986	+	upstream	-726	310	Upstream
MYC2_135.AT1G02630	chr1	563123	563307	185	*	21	2.03808	2.15698	0.872271	MYC2_135	AT1G02630	560610	562424	-	upstream	-699	699	Upstream
MYC2_135.AT1G02640	chr1	563123	563307	185	*	21	2.03808	2.15698	0.872271	MYC2_135	AT1G02640	564205	567769	+	upstream	-1082	898	Upstream
MYC2_136.AT1G02640	chr1	563613	563863	251	*	21	2.03808	2.15698	0.872271	MYC2_136	AT1G02640	564205	567769	+	upstream	-592	342	Upstream
MYC2_137.AT1G02640	chr1	564110	564294	185	*	31	2.44569	3.12521	1.71436	MYC2_137	AT1G02640	564205	567769	+	overlapStart	-95	89	Upstream
MYC2_140.AT1G02650	chr1	568001	568581	581	*	36	2.6495	3.65933	2.19401	MYC2_140	AT1G02650	568704	570418	+	upstream	-703	123	Upstream
MYC2_143.AT1G02660	chr1	575097	575321	225	*	119	5.07306	11.9717	10.076	MYC2_143	AT1G02660	571955	574981	-	upstream	-116	116	Upstream
MYC2_143.AT1G02670	chr1	575097	575321	225	*	119	5.07306	11.9717	10.076	MYC2_143	AT1G02670	576046	580299	+	upstream	-949	725	Upstream
MYC2_144.AT1G02660	chr1	575486	575953	468	*	127	5.23608	12.7034	10.7814	MYC2_144	AT1G02660	571955	574981	-	upstream	-505	505	Upstream
MYC2_144.AT1G02670	chr1	575486	575953	468	*	127	5.23608	12.7034	10.7814	MYC2_144	AT1G02670	576046	580299	+	upstream	-560	93	Upstream
MYC2_146.AT1G02681	chr1	582185	582482	298	*	26	2.2115	2.67657	1.32361	MYC2_146	AT1G02681	582413	582922	+	overlapStart	-228	69	Upstream
MYC2_147.AT1G02710	chr1	590877	591175	299	*	42	2.85331	4.2239	2.70893	MYC2_147	AT1G02710	589706	589996	-	upstream	-881	881	Upstream
MYC2_147.AT1G02720	chr1	590877	591175	299	*	42	2.85331	4.2239	2.70893	MYC2_147	AT1G02720	591826	594236	+	upstream	-949	651	Upstream
MYC2_148.AT1G02730	chr1	598631	598866	236	*	38	2.6831	3.88128	2.40855	MYC2_148	AT1G02730	594573	598657	-	overlapStart	26	26	Upstream
MYC2_149.AT1G02770	chr1	607306	607932	627	*	81	4.07615	8.15838	6.39981	MYC2_149	AT1G02770	604873	606693	-	upstream	-613	613	Upstream
MYC2_152.AT1G02816	chr1	621245	621518	274	*	55	3.04863	5.57297	3.96437	MYC2_152	AT1G02816	621461	622469	+	overlapStart	-216	57	Upstream
MYC2_153.AT1G02840	chr1	626629	626920	292	*	38	2.60322	3.86838	2.39706	MYC2_153	AT1G02840	626741	629819	+	overlapStart	-112	112	Upstream
MYC2_154.AT1G02850	chr1	630055	630400	346	*	122	4.88128	12.2107	10.2943	MYC2_154	AT1G02850	630505	633259	+	upstream	-450	105	Upstream
MYC2_156.AT1G02860	chr1	634612	635291	680	*	31	2.44569	3.12521	1.71436	MYC2_156	AT1G02860	635144	637262	+	overlapStart	-532	147	Upstream
MYC2_158.AT1G02880	chr1	644517	645066	550	*	220	6.5014	22.0539	19.886	MYC2_158	AT1G02880	642752	644903	-	overlapStart	386	163	Upstream
MYC2_159.AT1G02890	chr1	652306	652738	433	*	142	5.57422	14.2391	12.2659	MYC2_159	AT1G02890	645092	651907	-	upstream	-399	399	Upstream
MYC2_162.AT1G02930	chr1	662274	662740	467	*	81	4.07615	8.15838	6.39981	MYC2_162	AT1G02930	661177	662456	-	overlapStart	182	182	Upstream
MYC2_163.AT1G02990	chr1	687229	687774	546	*	365	9.69951	36.5044	34.1298	MYC2_163	AT1G02990	681396	687315	-	overlapStart	86	86	Upstream
MYC2_164.AT1G03030	chr1	700891	701465	575	*	97	4.03577	9.74187	7.91644	MYC2_164	AT1G03030	701478	703864	+	upstream	-587	13	Upstream
MYC2_165.AT1G03040	chr1	706436	706721	286	*	29	2.21999	2.91522	1.55178	MYC2_165	AT1G03040	703906	706631	-	overlapStart	195	90	Upstream
MYC2_166.AT1G03040	chr1	706983	707206	224	*	64	3.5151	6.42177	4.76838	MYC2_166	AT1G03040	703906	706631	-	upstream	-352	352	Upstream
MYC2_166.AT1G03050	chr1	706983	707206	224	*	64	3.5151	6.42177	4.76838	MYC2_166	AT1G03050	707726	710041	+	upstream	-743	520	Upstream
MYC2_167.AT1G03060	chr1	727395	728461	1067	*	93	4.33011	9.30281	7.50428	MYC2_167	AT1G03060	712473	726891	-	upstream	-504	504	Upstream
MYC2_168.AT1G03080	chr1	737947	738791	845	*	169	6.04515	16.9746	14.9265	MYC2_168	AT1G03080	731611	738056	-	overlapStart	109	109	Upstream
MYC2_168.AT1G03090	chr1	737947	738791	845	*	169	6.04515	16.9746	14.9265	MYC2_168	AT1G03090	739679	744184	+	upstream	-1732	888	Upstream
MYC2_169.AT1G03080	chr1	738983	739434	452	*	245	7.61405	24.5618	22.3547	MYC2_169	AT1G03080	731611	738056	-	upstream	-927	927	Upstream
MYC2_169.AT1G03090	chr1	738983	739434	452	*	245	7.61405	24.5618	22.3547	MYC2_169	AT1G03090	739679	744184	+	upstream	-696	245	Upstream
MYC2_170.AT1G03130	chr1	754205	754406	202	*	46	2.66753	4.63719	3.11024	MYC2_170	AT1G03130	753307	754198	-	upstream	-7	7	Upstream
MYC2_171.AT1G03160	chr1	760049	760315	267	*	21	2.0375	2.15597	0.872271	MYC2_171	AT1G03160	761282	766158	+	upstream	-1233	967	Upstream
MYC2_174.AT1G03200	chr1	780176	780500	325	*	81	3.81806	8.10779	6.37213	MYC2_174	AT1G03200	780602	781285	+	upstream	-426	102	Upstream
MYC2_176.AT1G03220	chr1	785455	786179	725	*	104	4.68758	10.4212	8.56585	MYC2_176	AT1G03220	787122	788651	+	upstream	-1667	943	Upstream
MYC2_177.AT1G03220	chr1	786477	787116	640	*	67	3.66854	6.75201	5.06605	MYC2_177	AT1G03220	787122	788651	+	upstream	-645	6	Upstream
MYC2_179.AT1G03260	chr1	798947	799203	257	*	85	4.00731	8.55808	6.79404	MYC2_179	AT1G03260	795532	798463	-	upstream	-484	484	Upstream
MYC2_179.AT1G03270	chr1	798947	799203	257	*	85	4.00731	8.55808	6.79404	MYC2_179	AT1G03270	799191	802436	+	overlapStart	-244	12	Upstream
MYC2_180.AT1G03290	chr1	807170	807392	223	*	23	2.07019	2.30669	1.01469	MYC2_180	AT1G03290	807361	810868	+	overlapStart	-191	31	Upstream
MYC2_181.AT1G03300	chr1	813128	813487	360	*	18	1.82294	1.84387	0.626493	MYC2_181	AT1G03300	811033	813086	-	upstream	-42	42	Upstream
MYC2_181.AT1G03310	chr1	813128	813487	360	*	18	1.82294	1.84387	0.626493	MYC2_181	AT1G03310	813471	816749	+	overlapStart	-343	16	Upstream
MYC2_182.AT1G03370	chr1	830372	830712	341	*	64	3.42722	6.45716	4.80325	MYC2_182	AT1G03370	830627	835361	+	overlapStart	-255	85	Upstream
MYC2_184.AT1G03440	chr1	851639	851823	185	*	31	2.44569	3.12521	1.71436	MYC2_184	AT1G03440	852366	854032	+	upstream	-727	543	Upstream
MYC2_187.AT1G03457	chr1	864203	864490	288	*	81	4.07615	8.15838	6.39981	MYC2_187	AT1G03457	860788	864125	-	upstream	-78	78	Upstream
MYC2_188.AT1G03457	chr1	864994	865458	465	*	154	5.91042	15.4207	13.4024	MYC2_188	AT1G03457	860788	864125	-	upstream	-869	869	Upstream
MYC2_189.AT1G03470	chr1	868121	868441	321	*	129	5.17454	12.9209	10.9783	MYC2_189	AT1G03470	865915	867733	-	upstream	-388	388	Upstream
MYC2_190.AT1G03470	chr1	868635	868829	195	*	30	2.42031	3.07708	1.70571	MYC2_190	AT1G03470	865915	867733	-	upstream	-902	902	Upstream
MYC2_191.AT1G03520	chr1	880211	880399	189	*	37	2.54373	3.7402	2.27298	MYC2_191	AT1G03520	877862	880158	-	upstream	-53	53	Upstream
MYC2_193.AT1G03560	chr1	892453	892763	311	*	23	2.12013	2.39932	1.1021	MYC2_193	AT1G03560	890156	892410	-	upstream	-43	43	Upstream
MYC2_193.AT1G03570	chr1	892453	892763	311	*	23	2.12013	2.39932	1.1021	MYC2_193	AT1G03570	892514	892585	+	includeFeature	-61	61	Upstream
MYC2_193.AT1G03580	chr1	892453	892763	311	*	23	2.12013	2.39932	1.1021	MYC2_193	AT1G03580	892847	894052	+	upstream	-394	84	Upstream
MYC2_195.AT1G03590	chr1	897362	897646	285	*	67	3.66854	6.75201	5.06605	MYC2_195	AT1G03590	894254	897518	-	overlapStart	156	128	Upstream
MYC2_196.AT1G03590	chr1	897774	898942	1169	*	181	6.52185	18.1248	16.038	MYC2_196	AT1G03590	894254	897518	-	upstream	-256	256	Upstream
MYC2_196.AT1G03600	chr1	897774	898942	1169	*	181	6.52185	18.1248	16.038	MYC2_196	AT1G03600	898876	899655	+	overlapStart	-1102	66	Upstream
MYC2_197.AT1G03610	chr1	899728	900828	1101	*	387	10.598	38.7966	36.3889	MYC2_197	AT1G03610	900887	903003	+	upstream	-1159	59	Upstream
MYC2_199.AT1G03700	chr1	920456	920678	223	*	36	2.6495	3.65933	2.19401	MYC2_199	AT1G03700	920950	921901	+	upstream	-494	272	Upstream
MYC2_200.AT1G03710	chr1	921593	922551	959	*	365	10.1904	36.5553	34.1722	MYC2_200	AT1G03710	923426	924726	+	upstream	-1833	875	Upstream
MYC2_201.AT1G03710	chr1	923308	923547	240	*	48	3.05712	4.81704	3.25478	MYC2_201	AT1G03710	923426	924726	+	overlapStart	-118	118	Upstream
MYC2_202.AT1G03720	chr1	927183	927368	186	*	42	2.85331	4.2239	2.70893	MYC2_202	AT1G03720	924996	926373	-	upstream	-810	810	Upstream
MYC2_205.AT1G03730	chr1	931525	932351	827	*	219	7.33708	21.9141	19.747	MYC2_205	AT1G03730	930828	931895	-	overlapStart	370	370	Upstream
MYC2_206.AT1G03730	chr1	932568	933719	1152	*	209	7.13327	20.9482	18.8004	MYC2_206	AT1G03730	930828	931895	-	upstream	-673	673	Upstream
MYC2_206.AT1G03740	chr1	932568	933719	1152	*	209	7.13327	20.9482	18.8004	MYC2_206	AT1G03740	933512	937043	+	overlapStart	-944	207	Upstream
MYC2_207.AT1G03743	chr1	936665	937426	762	*	66	3.5194	6.66602	5.00726	MYC2_207	AT1G03743	937207	937287	-	includeFeature	622	139	Upstream
MYC2_207.AT1G03750	chr1	936665	937426	762	*	66	3.5194	6.66602	5.00726	MYC2_207	AT1G03750	937920	941162	+	upstream	-1255	494	Upstream
MYC2_208.AT1G03760	chr1	943573	943804	232	*	64	3.51682	6.4255	4.77199	MYC2_208	AT1G03760	941062	943377	-	upstream	-196	196	Upstream
MYC2_208.AT1G03770	chr1	943573	943804	232	*	64	3.51682	6.4255	4.77199	MYC2_208	AT1G03770	944572	947483	+	upstream	-999	768	Upstream
MYC2_211.AT1G03800	chr1	957991	958258	268	*	106	4.0715	10.686	8.82711	MYC2_211	AT1G03800	957261	957998	-	overlapStart	7	7	Upstream
MYC2_211.AT1G03810	chr1	957991	958258	268	*	106	4.0715	10.686	8.82711	MYC2_211	AT1G03810	958759	959609	+	upstream	-768	501	Upstream
MYC2_212.AT1G03820	chr1	961237	961563	327	*	72	3.78251	7.24932	5.55359	MYC2_212	AT1G03820	959869	960728	-	upstream	-509	509	Upstream
MYC2_214.AT1G03830	chr1	966956	967162	207	*	36	2.6495	3.65933	2.19401	MYC2_214	AT1G03830	962016	966757	-	upstream	-199	199	Upstream
MYC2_215.AT1G03840	chr1	970678	970953	276	*	120	5.09519	12.0221	10.1079	MYC2_215	AT1G03840	967503	970130	-	upstream	-548	548	Upstream
MYC2_219.AT1G03850	chr1	978185	978401	217	*	36	2.6495	3.65933	2.19401	MYC2_219	AT1G03850	976097	977761	-	upstream	-424	424	Upstream
MYC2_220.AT1G03850	chr1	978627	979489	863	*	42	2.85331	4.2239	2.70893	MYC2_220	AT1G03850	976097	977761	-	upstream	-866	866	Upstream
MYC2_221.AT1G03860	chr1	982032	982606	575	*	42	2.85331	4.2239	2.70893	MYC2_221	AT1G03860	979308	981885	-	upstream	-147	147	Upstream
MYC2_222.AT1G03870	chr1	983391	984652	1262	*	291	8.17628	29.1051	26.8192	MYC2_222	AT1G03870	982506	983540	-	overlapStart	149	149	Upstream
MYC2_223.AT1G03930	chr1	1004667	1005171	505	*	48	3.05712	4.81704	3.25478	MYC2_223	AT1G03930	1004769	1008370	+	overlapStart	-102	102	Upstream
MYC2_225.AT1G03970	chr1	1017969	1018219	251	*	61	3.39558	6.16026	4.51186	MYC2_225	AT1G03970	1018100	1019247	+	overlapStart	-131	119	Upstream
MYC2_226.AT1G03980	chr1	1022116	1022387	272	*	87	4.10747	8.79222	7.02445	MYC2_226	AT1G03980	1018570	1022108	-	upstream	-8	8	Upstream
MYC2_227.AT1G03982	chr1	1023998	1024666	669	*	1324	24.8645	132.478	128.824	MYC2_227	AT1G03982	1022251	1023719	-	upstream	-279	279	Upstream
MYC2_227.AT1G03990	chr1	1023998	1024666	669	*	1324	24.8645	132.478	128.824	MYC2_227	AT1G03990	1024847	1027616	+	upstream	-849	181	Upstream
MYC2_229.AT1G04000	chr1	1028984	1029405	422	*	26	2.24189	2.62363	1.2736	MYC2_229	AT1G04000	1028106	1029119	-	overlapStart	135	135	Upstream
MYC2_230.AT1G04000	chr1	1029784	1030246	463	*	21	2.03808	2.15698	0.872271	MYC2_230	AT1G04000	1028106	1029119	-	upstream	-665	665	Upstream
MYC2_232.AT1G04040	chr1	1044721	1044959	239	*	54	3.26092	5.43708	3.83145	MYC2_232	AT1G04040	1042362	1043864	-	upstream	-857	857	Upstream
MYC2_233.AT1G04090	chr1	1056870	1057176	307	*	47	2.92438	4.72588	3.19578	MYC2_233	AT1G04090	1057151	1059419	+	overlapStart	-281	25	Upstream
MYC2_235.AT1G04110	chr1	1064199	1064728	530	*	117	4.82049	11.7238	9.83192	MYC2_235	AT1G04110	1061457	1063784	-	upstream	-415	415	Upstream
MYC2_236.AT1G04120	chr1	1070965	1071479	515	*	104	4.44363	10.4851	8.62825	MYC2_236	AT1G04120	1064450	1071047	-	overlapStart	82	82	Upstream
MYC2_237.AT1G04130	chr1	1072355	1072792	438	*	41	2.65155	4.1274	2.64674	MYC2_237	AT1G04130	1073427	1075568	+	upstream	-1072	635	Upstream
MYC2_238.AT1G04140	chr1	1080706	1081529	824	*	62	3.45265	6.2856	4.63474	MYC2_238	AT1G04140	1075543	1080630	-	upstream	-76	76	Upstream
MYC2_239.AT1G04150	chr1	1084582	1084881	300	*	55	2.97862	5.59295	3.98395	MYC2_239	AT1G04150	1081208	1084246	-	upstream	-336	336	Upstream
MYC2_240.AT1G04160	chr1	1085982	1086172	191	*	45	2.91075	4.51671	2.99379	MYC2_240	AT1G04160	1086495	1096146	+	upstream	-513	323	Upstream
MYC2_241.AT1G04170	chr1	1096681	1096894	214	*	30	2.40092	3.04022	1.67035	MYC2_241	AT1G04170	1096946	1099898	+	upstream	-265	52	Upstream
MYC2_245.AT1G04180	chr1	1103980	1104171	192	*	31	2.44569	3.12521	1.71436	MYC2_245	AT1G04180	1104623	1105988	+	upstream	-643	452	Upstream
MYC2_246.AT1G04230	chr1	1125175	1125488	314	*	67	3.66854	6.75201	5.06605	MYC2_246	AT1G04230	1125518	1128168	+	upstream	-343	30	Upstream
MYC2_247.AT1G04240	chr1	1129401	1129809	409	*	109	4.51225	10.9675	9.10418	MYC2_247	AT1G04240	1128188	1129551	-	overlapStart	150	150	Upstream
MYC2_248.AT1G04240	chr1	1130167	1130834	668	*	81	4.07615	8.15838	6.39981	MYC2_248	AT1G04240	1128188	1129551	-	upstream	-616	616	Upstream
MYC2_251.AT1G04250	chr1	1134291	1135630	1340	*	63	3.0541	6.36882	4.7164	MYC2_251	AT1G04250	1136258	1138613	+	upstream	-1967	628	Upstream
MYC2_253.AT1G04260	chr1	1141325	1142058	734	*	58	3.14871	5.81098	4.19717	MYC2_253	AT1G04260	1140528	1141365	-	overlapStart	40	40	Upstream
MYC2_254.AT1G04270	chr1	1143025	1143309	285	*	82	3.87219	8.23766	6.47843	MYC2_254	AT1G04270	1141604	1143053	-	overlapStart	28	28	Upstream
MYC2_255.AT1G04310	chr1	1157778	1157976	199	*	67	3.66854	6.75201	5.06605	MYC2_255	AT1G04310	1154764	1157711	-	upstream	-67	67	Upstream
MYC2_256.AT1G04320	chr1	1158878	1159406	529	*	172	6.31804	17.2096	15.1446	MYC2_256	AT1G04320	1159023	1159093	+	includeFeature	-145	145	Upstream
MYC2_258.AT1G04360	chr1	1169349	1169855	507	*	42	2.85331	4.2239	2.70893	MYC2_258	AT1G04360	1167457	1168878	-	upstream	-471	471	Upstream
MYC2_261.AT1G04370	chr1	1174184	1174520	337	*	321	9.37516	32.1769	29.8476	MYC2_261	AT1G04370	1175177	1175578	+	upstream	-993	657	Upstream
MYC2_262.AT1G04370	chr1	1174858	1175071	214	*	74	3.87235	7.44433	5.72108	MYC2_262	AT1G04370	1175177	1175578	+	upstream	-319	106	Upstream
MYC2_265.AT1G04400	chr1	1189003	1189295	293	*	32	2.46634	3.29917	1.88238	MYC2_265	AT1G04400	1185550	1188517	-	upstream	-486	486	Upstream
MYC2_266.AT1G04425	chr1	1193876	1194147	272	*	64	3.31443	6.41664	4.76332	MYC2_266	AT1G04425	1194187	1196889	+	upstream	-311	40	Upstream
MYC2_267.AT1G04430	chr1	1197639	1198120	482	*	67	3.66854	6.75201	5.06605	MYC2_267	AT1G04430	1198118	1201527	+	overlapStart	-479	2	Upstream
MYC2_268.AT1G04440	chr1	1202027	1202342	316	*	120	5.09519	12.0221	10.1079	MYC2_268	AT1G04440	1202255	1205803	+	overlapStart	-228	87	Upstream
MYC2_269.AT1G04445	chr1	1206466	1206676	211	*	42	2.85331	4.2239	2.70893	MYC2_269	AT1G04445	1207344	1207862	+	upstream	-878	668	Upstream
MYC2_270.AT1G04480	chr1	1215769	1216006	238	*	14	1.63824	1.4959	0.357241	MYC2_270	AT1G04480	1216095	1217467	+	upstream	-326	89	Upstream
MYC2_271.AT1G04490	chr1	1221016	1221281	266	*	42	2.85331	4.2239	2.70893	MYC2_271	AT1G04490	1217948	1220137	-	upstream	-879	879	Upstream
MYC2_272.AT1G04530	chr1	1235993	1236884	892	*	267	8.28997	26.7541	24.5106	MYC2_272	AT1G04530	1234176	1236034	-	overlapStart	41	41	Upstream
MYC2_272.AT1G04540	chr1	1235993	1236884	892	*	267	8.28997	26.7541	24.5106	MYC2_272	AT1G04540	1237256	1239061	+	upstream	-1263	372	Upstream
MYC2_273.AT1G04570	chr1	1249068	1249293	226	*	96	4.48377	9.64772	7.82338	MYC2_273	AT1G04570	1246728	1248775	-	upstream	-293	293	Upstream
MYC2_277.AT1G04645	chr1	1294301	1294556	256	*	50	3.06314	5.02263	3.45611	MYC2_277	AT1G04645	1293770	1294263	-	upstream	-38	38	Upstream
MYC2_278.AT1G04650	chr1	1299327	1299544	218	*	48	3.05712	4.81704	3.25478	MYC2_278	AT1G04650	1294893	1299002	-	upstream	-325	325	Upstream
MYC2_281.AT1G04680	chr1	1307673	1307888	216	*	24	2.16459	2.48149	1.17917	MYC2_281	AT1G04680	1303529	1307884	-	overlapStart	211	4	Upstream
MYC2_282.AT1G04680	chr1	1308039	1308239	201	*	31	2.3201	3.12817	1.71672	MYC2_282	AT1G04680	1303529	1307884	-	upstream	-155	155	Upstream
MYC2_283.AT1G04684	chr1	1311064	1311274	211	*	26	2.24189	2.62363	1.2736	MYC2_283	AT1G04684	1310430	1310579	-	upstream	-485	485	Upstream
MYC2_284.AT1G04690	chr1	1312873	1313449	577	*	71	3.73884	7.15378	5.4603	MYC2_284	AT1G04690	1313564	1315750	+	upstream	-691	115	Upstream
MYC2_285.AT1G04700	chr1	1315583	1315998	416	*	104	4.68758	10.4212	8.56585	MYC2_285	AT1G04700	1316254	1320919	+	upstream	-671	256	Upstream
MYC2_286.AT1G04720	chr1	1324740	1324999	260	*	53	3.12574	5.35472	3.77887	MYC2_286	AT1G04720	1324923	1324960	+	includeFeature	-183	39	Upstream
MYC2_287.AT1G04750	chr1	1333590	1333853	264	*	52	3.09441	5.2859	3.71228	MYC2_287	AT1G04750	1331466	1333567	-	upstream	-23	23	Upstream
MYC2_287.AT1G04760	chr1	1333590	1333853	264	*	52	3.09441	5.2859	3.71228	MYC2_287	AT1G04760	1334760	1336070	+	upstream	-1170	907	Upstream
MYC2_288.AT1G04770	chr1	1337884	1338705	822	*	85	4.13532	8.57154	6.80635	MYC2_288	AT1G04770	1336371	1337849	-	upstream	-35	35	Upstream
MYC2_290.AT1G04780	chr1	1343921	1344105	185	*	35	2.60883	3.57998	2.15193	MYC2_290	AT1G04780	1340669	1343584	-	upstream	-337	337	Upstream
MYC2_290.AT1G04790	chr1	1343921	1344105	185	*	35	2.60883	3.57998	2.15193	MYC2_290	AT1G04790	1345036	1348451	+	upstream	-1115	931	Upstream
MYC2_291.AT1G04780	chr1	1344526	1344778	253	*	16	1.77054	1.62078	0.470971	MYC2_291	AT1G04780	1340669	1343584	-	upstream	-942	942	Upstream
MYC2_291.AT1G04790	chr1	1344526	1344778	253	*	16	1.77054	1.62078	0.470971	MYC2_291	AT1G04790	1345036	1348451	+	upstream	-510	258	Upstream
MYC2_293.AT1G04830	chr1	1361849	1362571	723	*	405	10.3061	40.5234	38.1012	MYC2_293	AT1G04830	1358574	1362019	-	overlapStart	170	170	Upstream
MYC2_294.AT1G04920	chr1	1395892	1396106	215	*	55	3.22674	5.57473	3.96611	MYC2_294	AT1G04920	1391502	1395864	-	upstream	-28	28	Upstream
MYC2_295.AT1G04960	chr1	1410879	1411125	247	*	44	2.87307	4.43853	2.91774	MYC2_295	AT1G04960	1407801	1410868	-	upstream	-11	11	Upstream
MYC2_295.AT1G04970	chr1	1410879	1411125	247	*	44	2.87307	4.43853	2.91774	MYC2_295	AT1G04970	1411170	1413627	+	upstream	-291	45	Upstream
MYC2_296.AT1G04985	chr1	1418533	1418879	347	*	70	3.68875	7.04358	5.35213	MYC2_296	AT1G04985	1416343	1418482	-	upstream	-51	51	Upstream
MYC2_297.AT1G04990	chr1	1421561	1421933	373	*	60	3.46473	6.08252	4.43613	MYC2_297	AT1G04990	1419080	1421789	-	overlapStart	228	144	Upstream
MYC2_299.AT1G05000	chr1	1425370	1425602	233	*	26	2.24189	2.62363	1.2736	MYC2_299	AT1G05000	1425593	1428782	+	overlapStart	-223	9	Upstream
MYC2_302.AT1G05010	chr1	1431681	1433559	1879	*	74	3.87235	7.44433	5.72108	MYC2_302	AT1G05010	1431190	1432858	-	overlapStart	1177	491	Upstream
MYC2_304.AT1G05020	chr1	1437471	1437994	524	*	36	2.6495	3.65933	2.19401	MYC2_304	AT1G05020	1435254	1437667	-	overlapStart	196	196	Upstream
MYC2_305.AT1G05065	chr1	1456143	1456327	185	*	21	2.03808	2.15698	0.872271	MYC2_305	AT1G05065	1454969	1455220	-	upstream	-923	923	Upstream
MYC2_307.AT1G05100	chr1	1467998	1468754	757	*	387	10.598	38.7966	36.3889	MYC2_307	AT1G05100	1469610	1470881	+	upstream	-1612	856	Upstream
MYC2_308.AT1G05100	chr1	1469101	1469559	459	*	261	7.84473	26.1594	23.9201	MYC2_308	AT1G05100	1469610	1470881	+	upstream	-509	51	Upstream
MYC2_311.AT1G05135	chr1	1478861	1479687	827	*	57	2.94832	5.70257	4.09125	MYC2_311	AT1G05135	1477500	1478821	-	upstream	-40	40	Upstream
MYC2_311.AT1G05136	chr1	1478861	1479687	827	*	57	2.94832	5.70257	4.09125	MYC2_311	AT1G05136	1478923	1479063	+	includeFeature	-62	62	Upstream
MYC2_313.AT1G05170	chr1	1494739	1495440	702	*	176	6.16372	17.6873	15.6182	MYC2_313	AT1G05170	1491111	1494248	-	upstream	-491	491	Upstream
MYC2_316.AT1G05190	chr1	1503979	1505074	1096	*	376	10.13	37.6192	35.2317	MYC2_316	AT1G05190	1502344	1503830	-	upstream	-149	149	Upstream
MYC2_316.AT1G05200	chr1	1503979	1505074	1096	*	376	10.13	37.6192	35.2317	MYC2_316	AT1G05200	1504960	1509152	+	overlapStart	-981	114	Upstream
MYC2_321.AT1G05300	chr1	1548217	1548829	613	*	88	4.27996	8.89315	7.10093	MYC2_321	AT1G05300	1545106	1547849	-	upstream	-368	368	Upstream
MYC2_325.AT1G05340	chr1	1559820	1560133	314	*	172	6.31804	17.2096	15.1446	MYC2_325	AT1G05340	1558844	1559903	-	overlapStart	83	83	Upstream
MYC2_329.AT1G05370	chr1	1572318	1572801	484	*	48	3.05712	4.81704	3.25478	MYC2_329	AT1G05370	1569192	1572280	-	upstream	-38	38	Upstream
MYC2_330.AT1G05380	chr1	1576604	1576926	323	*	48	3.05712	4.81704	3.25478	MYC2_330	AT1G05380	1576863	1582614	+	overlapStart	-259	63	Upstream
MYC2_331.AT1G05410	chr1	1587790	1588666	877	*	237	7.11547	23.7508	21.5593	MYC2_331	AT1G05410	1585371	1587778	-	upstream	-12	12	Upstream
MYC2_332.AT1G05420	chr1	1589818	1590226	409	*	199	6.92946	19.9944	17.8664	MYC2_332	AT1G05420	1590073	1590753	+	overlapStart	-255	153	Upstream
MYC2_334.AT1G05460	chr1	1604891	1605208	318	*	126	4.65666	12.6303	10.7091	MYC2_334	AT1G05460	1601148	1605027	-	overlapStart	136	136	Upstream
MYC2_335.AT1G05460	chr1	1605895	1606249	355	*	36	2.6495	3.65933	2.19401	MYC2_335	AT1G05460	1601148	1605027	-	upstream	-868	868	Upstream
MYC2_336.AT1G05530	chr1	1638801	1639138	338	*	60	3.46473	6.08252	4.43613	MYC2_336	AT1G05530	1636496	1637863	-	upstream	-938	938	Upstream
MYC2_336.AT1G05540	chr1	1638801	1639138	338	*	60	3.46473	6.08252	4.43613	MYC2_336	AT1G05540	1639286	1640811	+	upstream	-485	148	Upstream
MYC2_338.AT1G05562	chr1	1645407	1645797	391	*	31	2.36795	3.10279	1.71436	MYC2_338	AT1G05562	1645875	1647162	+	upstream	-468	78	Upstream
MYC2_339.AT1G05560	chr1	1646888	1647751	864	*	81	4.07615	8.15838	6.39981	MYC2_339	AT1G05560	1645498	1647147	-	overlapStart	259	259	Upstream
MYC2_340.AT1G05570	chr1	1659426	1659610	185	*	33	2.42967	3.3587	1.939	MYC2_340	AT1G05570	1647706	1659437	-	overlapStart	11	11	Upstream
MYC2_341.AT1G05570	chr1	1659874	1660601	728	*	154	5.91042	15.4207	13.4024	MYC2_341	AT1G05570	1647706	1659437	-	upstream	-437	437	Upstream
MYC2_343.AT1G05575	chr1	1662175	1662701	527	*	711	15.5165	71.1443	68.4565	MYC2_343	AT1G05575	1661691	1662187	-	overlapStart	12	12	Upstream
MYC2_344.AT1G05610	chr1	1676207	1676414	208	*	66	3.61223	6.63152	4.97323	MYC2_344	AT1G05610	1673861	1675934	-	upstream	-273	273	Upstream
MYC2_345.AT1G05615	chr1	1678922	1679296	375	*	163	6.11423	16.3081	14.2657	MYC2_345	AT1G05615	1677507	1678270	-	upstream	-652	652	Upstream
MYC2_345.AT1G05620	chr1	1678922	1679296	375	*	163	6.11423	16.3081	14.2657	MYC2_345	AT1G05620	1679158	1681710	+	overlapStart	-236	138	Upstream
MYC2_346.AT1G05630	chr1	1681921	1682408	488	*	180	6.30261	18.0315	15.9594	MYC2_346	AT1G05630	1682318	1687363	+	overlapStart	-397	90	Upstream
MYC2_347.AT1G05660	chr1	1696137	1696369	233	*	36	2.6495	3.65933	2.19401	MYC2_347	AT1G05660	1694286	1696058	-	upstream	-79	79	Upstream
MYC2_348.AT1G05675	chr1	1702773	1702966	194	*	58	3.34599	5.83099	4.21609	MYC2_348	AT1G05675	1701116	1702749	-	upstream	-24	24	Upstream
MYC2_349.AT1G05680	chr1	1704726	1705105	380	*	111	4.84552	11.109	9.24402	MYC2_349	AT1G05680	1703092	1704691	-	upstream	-35	35	Upstream
MYC2_350.AT1G05710	chr1	1713350	1714463	1114	*	252	7.8768	25.2187	22.9959	MYC2_350	AT1G05710	1714950	1717276	+	upstream	-1600	487	Upstream
MYC2_351.AT1G05785	chr1	1729945	1730199	255	*	101	4.58797	10.1965	8.36478	MYC2_351	AT1G05785	1730249	1732626	+	upstream	-304	50	Upstream
MYC2_354.AT1G05805	chr1	1743687	1744910	1224	*	1265	24.0493	126.521	122.969	MYC2_354	AT1G05805	1744773	1747693	+	overlapStart	-1086	137	Upstream
MYC2_356.AT1G05810	chr1	1747389	1747681	293	*	54	3.26092	5.43708	3.83145	MYC2_356	AT1G05810	1748314	1749460	+	upstream	-925	633	Upstream
MYC2_357.AT1G05810	chr1	1747961	1748374	414	*	60	3.46473	6.08252	4.43613	MYC2_357	AT1G05810	1748314	1749460	+	overlapStart	-353	60	Upstream
MYC2_358.AT1G05840	chr1	1766351	1766742	392	*	31	2.38917	3.14532	1.73358	MYC2_358	AT1G05840	1762734	1766281	-	upstream	-70	70	Upstream
MYC2_359.AT1G05850	chr1	1768771	1769125	355	*	46	2.83003	4.69431	3.16549	MYC2_359	AT1G05850	1766503	1768695	-	upstream	-76	76	Upstream
MYC2_359.AT1G05860	chr1	1768771	1769125	355	*	46	2.83003	4.69431	3.16549	MYC2_359	AT1G05860	1769014	1771115	+	overlapStart	-243	111	Upstream
MYC2_360.AT1G05870	chr1	1773628	1774155	528	*	217	7.28301	21.7844	19.6306	MYC2_360	AT1G05870	1771457	1773293	-	upstream	-335	335	Upstream
MYC2_361.AT1G05890	chr1	1779190	1779436	247	*	26	2.24189	2.62363	1.2736	MYC2_361	AT1G05890	1779256	1784529	+	overlapStart	-66	66	Upstream
MYC2_362.AT1G05950	chr1	1807482	1807930	449	*	231	7.26784	23.1921	21.0055	MYC2_362	AT1G05950	1804401	1807471	-	upstream	-11	11	Upstream
MYC2_363.AT1G05970	chr1	1817293	1817576	284	*	94	4.39948	9.45925	7.65922	MYC2_363	AT1G05970	1816056	1817282	-	upstream	-11	11	Upstream
MYC2_363.AT1G05980	chr1	1817293	1817576	284	*	94	4.39948	9.45925	7.65922	MYC2_363	AT1G05980	1817400	1817471	+	includeFeature	-107	105	Upstream
MYC2_363.AT1G05990	chr1	1817293	1817576	284	*	94	4.39948	9.45925	7.65922	MYC2_363	AT1G05990	1818447	1819040	+	upstream	-1154	871	Upstream
MYC2_364.AT1G06002	chr1	1819697	1820661	965	*	516	12.8399	51.6833	49.1572	MYC2_364	AT1G06002	1820977	1821918	+	upstream	-1280	316	Upstream
MYC2_365.AT1G06000	chr1	1821600	1822622	1023	*	374	9.84924	37.4929	35.1059	MYC2_365	AT1G06000	1820308	1821894	-	overlapStart	294	294	Upstream
MYC2_365.AT1G06010	chr1	1821600	1822622	1023	*	374	9.84924	37.4929	35.1059	MYC2_365	AT1G06010	1822618	1823997	+	overlapStart	-1018	4	Upstream
MYC2_366.AT1G06040	chr1	1829857	1830280	424	*	47	3.01777	4.73682	3.20654	MYC2_366	AT1G06040	1828413	1829890	-	overlapStart	33	33	Upstream
MYC2_367.AT1G06070	chr1	1837635	1838458	824	*	122	4.74725	12.2107	10.2943	MYC2_367	AT1G06070	1834829	1837648	-	overlapStart	13	13	Upstream
MYC2_370.AT1G06130	chr1	1860778	1861176	399	*	26	2.24189	2.62363	1.2736	MYC2_370	AT1G06130	1857767	1860730	-	upstream	-48	48	Upstream
MYC2_371.AT1G06135	chr1	1861824	1862076	253	*	104	4.68758	10.4212	8.56585	MYC2_371	AT1G06135	1862197	1862742	+	upstream	-373	121	Upstream
MYC2_372.AT1G06149	chr1	1873575	1873897	323	*	20	1.90903	2.00568	0.776836	MYC2_372	AT1G06149	1868989	1873718	-	overlapStart	143	143	Upstream
MYC2_372.AT1G06150	chr1	1873575	1873897	323	*	20	1.90903	2.00568	0.776836	MYC2_372	AT1G06150	1867015	1873718	-	overlapStart	143	143	Upstream
MYC2_373.AT1G06149	chr1	1874077	1874704	628	*	54	3.26092	5.43708	3.83145	MYC2_373	AT1G06149	1868989	1873718	-	upstream	-359	359	Upstream
MYC2_373.AT1G06150	chr1	1874077	1874704	628	*	54	3.26092	5.43708	3.83145	MYC2_373	AT1G06150	1867015	1873718	-	upstream	-359	359	Upstream
MYC2_375.AT1G06148	chr1	1877362	1877937	576	*	457	11.8208	45.7138	43.2382	MYC2_375	AT1G06148	1874885	1877528	-	overlapStart	166	166	Upstream
MYC2_376.AT1G06148	chr1	1878322	1879756	1435	*	3122	47.0796	312.237	306.209	MYC2_376	AT1G06148	1874885	1877528	-	upstream	-794	794	Upstream
MYC2_379.AT1G06160	chr1	1882491	1883021	531	*	541	13.2475	54.1196	51.5737	MYC2_379	AT1G06160	1883004	1883934	+	overlapStart	-513	17	Upstream
MYC2_382.AT1G06170	chr1	1887861	1888527	667	*	55	2.97862	5.59295	3.98395	MYC2_382	AT1G06170	1884981	1886897	-	upstream	-964	964	Upstream
MYC2_382.AT1G06180	chr1	1887861	1888527	667	*	55	2.97862	5.59295	3.98395	MYC2_382	AT1G06180	1889408	1891158	+	upstream	-1547	881	Upstream
MYC2_383.AT1G06180	chr1	1888839	1889208	370	*	17	1.82537	1.71298	0.517312	MYC2_383	AT1G06180	1889408	1891158	+	upstream	-569	200	Upstream
MYC2_384.AT1G06180	chr1	1889350	1889803	454	*	24	2.16459	2.48149	1.17917	MYC2_384	AT1G06180	1889408	1891158	+	overlapStart	-58	58	Upstream
MYC2_388.AT1G06200	chr1	1896932	1897237	306	*	92	4.17703	9.24227	7.44592	MYC2_388	AT1G06200	1894336	1896935	-	overlapStart	3	3	Upstream
MYC2_388.AT1G06210	chr1	1896932	1897237	306	*	92	4.17703	9.24227	7.44592	MYC2_388	AT1G06210	1897203	1899208	+	overlapStart	-271	34	Upstream
MYC2_389.AT1G06310	chr1	1926317	1926758	442	*	71	3.75444	7.18797	5.49365	MYC2_389	AT1G06310	1926791	1930258	+	upstream	-474	33	Upstream
MYC2_391.AT1G06390	chr1	1946657	1947041	385	*	27	2.20408	2.77131	1.4142	MYC2_391	AT1G06390	1946788	1950860	+	overlapStart	-131	131	Upstream
MYC2_393.AT1G06400	chr1	1953404	1954436	1033	*	604	12.4792	60.437	57.8405	MYC2_393	AT1G06400	1950844	1952785	-	upstream	-619	619	Upstream
MYC2_393.AT1G06410	chr1	1953404	1954436	1033	*	604	12.4792	60.437	57.8405	MYC2_393	AT1G06410	1954850	1958756	+	upstream	-1446	414	Upstream
MYC2_394.AT1G06410	chr1	1954613	1954942	330	*	52	3.16007	5.22697	3.65435	MYC2_394	AT1G06410	1954850	1958756	+	overlapStart	-237	92	Upstream
MYC2_395.AT1G06475	chr1	1974495	1974835	341	*	88	4.27996	8.89315	7.10093	MYC2_395	AT1G06475	1973834	1974386	-	upstream	-109	109	Upstream
MYC2_396.AT1G06480	chr1	1977760	1978379	620	*	22	1.8894	2.27591	0.986261	MYC2_396	AT1G06480	1978084	1978157	+	includeFeature	-324	222	Upstream
MYC2_396.AT1G06490	chr1	1977760	1978379	620	*	22	1.8894	2.27591	0.986261	MYC2_396	AT1G06490	1978762	1989409	+	upstream	-1002	383	Upstream
MYC2_397.AT1G06520	chr1	1997109	1997340	232	*	60	3.46473	6.08252	4.43613	MYC2_397	AT1G06520	1993978	1996112	-	upstream	-997	997	Upstream
MYC2_400.AT1G06530	chr1	2001149	2001430	282	*	128	5.299	12.8481	10.9066	MYC2_400	AT1G06530	2001594	2002596	+	upstream	-445	164	Upstream
MYC2_401.AT1G06570	chr1	2013577	2013962	386	*	46	2.86666	4.60096	3.07508	MYC2_401	AT1G06570	2011885	2013545	-	upstream	-32	32	Upstream
MYC2_402.AT1G06590	chr1	2025013	2026171	1159	*	1586	27.6431	158.633	154.674	MYC2_402	AT1G06590	2016308	2024662	-	upstream	-351	351	Upstream
MYC2_402.AT1G06610	chr1	2025013	2026171	1159	*	1586	27.6431	158.633	154.674	MYC2_402	AT1G06610	2025356	2025428	+	includeFeature	-343	343	Upstream
MYC2_402.AT1G06620	chr1	2025013	2026171	1159	*	1586	27.6431	158.633	154.674	MYC2_402	AT1G06620	2025601	2027271	+	overlapStart	-588	570	Upstream
MYC2_403.AT1G06630	chr1	2027360	2027750	391	*	81	4.07615	8.15838	6.39981	MYC2_403	AT1G06630	2027739	2031388	+	overlapStart	-379	11	Upstream
MYC2_405.AT1G06640	chr1	2031894	2032495	602	*	775	15.8471	77.5059	74.7591	MYC2_405	AT1G06640	2032338	2034018	+	overlapStart	-444	157	Upstream
MYC2_406.AT1G06645	chr1	2033750	2034251	502	*	60	3.23029	6.00267	4.38377	MYC2_406	AT1G06645	2034156	2035626	+	overlapStart	-406	95	Upstream
MYC2_407.AT1G06650	chr1	2035454	2036105	652	*	156	5.65563	15.6026	13.5823	MYC2_407	AT1G06650	2035839	2037366	+	overlapStart	-385	266	Upstream
MYC2_409.AT1G06780	chr1	2083093	2083392	300	*	33	2.37856	3.37965	1.95911	MYC2_409	AT1G06780	2083311	2087131	+	overlapStart	-218	81	Upstream
MYC2_412.AT1G06800	chr1	2091357	2091899	543	*	124	4.98507	12.4646	10.5455	MYC2_412	AT1G06800	2089417	2091686	-	overlapStart	329	213	Upstream
MYC2_413.AT1G06840	chr1	2103307	2103565	259	*	48	2.99565	4.87894	3.31527	MYC2_413	AT1G06840	2097747	2103479	-	overlapStart	172	86	Upstream
MYC2_414.AT1G06850	chr1	2104780	2105215	436	*	162	5.91498	16.2441	14.2172	MYC2_414	AT1G06850	2105048	2106749	+	overlapStart	-268	167	Upstream
MYC2_415.AT1G06860	chr1	2107320	2108219	900	*	41	2.83072	4.17882	2.69539	MYC2_415	AT1G06860	2107398	2107468	-	includeFeature	148	78	Upstream
MYC2_415.AT1G06870	chr1	2107320	2108219	900	*	41	2.83072	4.17882	2.69539	MYC2_415	AT1G06870	2108593	2110986	+	upstream	-1273	374	Upstream
MYC2_416.AT1G06880	chr1	2110921	2111482	562	*	35	2.5945	3.55192	2.12463	MYC2_416	AT1G06880	2111148	2111218	-	includeFeature	297	227	Upstream
MYC2_417.AT1G06890	chr1	2114563	2114826	264	*	63	3.48107	6.34769	4.69545	MYC2_417	AT1G06890	2111363	2114601	-	overlapStart	38	38	Upstream
MYC2_418.AT1G06920	chr1	2126341	2126550	210	*	24	2.15233	2.45885	1.15877	MYC2_418	AT1G06920	2124854	2125801	-	upstream	-540	540	Upstream
MYC2_418.AT1G06923	chr1	2126341	2126550	210	*	24	2.15233	2.45885	1.15877	MYC2_418	AT1G06923	2126749	2128060	+	upstream	-408	199	Upstream
MYC2_422.AT1G06990	chr1	2147351	2147752	402	*	36	2.6495	3.65933	2.19401	MYC2_422	AT1G06990	2148387	2150152	+	upstream	-1036	635	Upstream
MYC2_423.AT1G07030	chr1	2160627	2160904	278	*	45	2.84392	4.55149	3.02692	MYC2_423	AT1G07030	2158420	2160809	-	overlapStart	182	95	Upstream
MYC2_424.AT1G07040	chr1	2163769	2164564	796	*	833	17.099	83.3241	80.5175	MYC2_424	AT1G07040	2160938	2163308	-	upstream	-461	461	Upstream
MYC2_424.AT1G07051	chr1	2163769	2164564	796	*	833	17.099	83.3241	80.5175	MYC2_424	AT1G07051	2165517	2165746	+	upstream	-1748	953	Upstream
MYC2_425.AT1G07050	chr1	2165183	2165496	314	*	69	3.63573	6.92622	5.23777	MYC2_425	AT1G07050	2164188	2165239	-	overlapStart	56	56	Upstream
MYC2_425.AT1G07051	chr1	2165183	2165496	314	*	69	3.63573	6.92622	5.23777	MYC2_425	AT1G07051	2165517	2165746	+	upstream	-334	21	Upstream
MYC2_426.AT1G07050	chr1	2165840	2166275	436	*	49	3.02544	4.9425	3.37766	MYC2_426	AT1G07050	2164188	2165239	-	upstream	-601	601	Upstream
MYC2_427.AT1G07080	chr1	2169829	2170096	268	*	31	2.3201	3.12817	1.71672	MYC2_427	AT1G07080	2169982	2172194	+	overlapStart	-153	114	Upstream
MYC2_429.AT1G07090	chr1	2174756	2175297	542	*	422	11.2094	42.2201	39.7773	MYC2_429	AT1G07090	2173952	2174894	-	overlapStart	138	138	Upstream
MYC2_431.AT1G07100	chr1	2176874	2177064	191	*	31	2.44569	3.12521	1.71436	MYC2_431	AT1G07100	2177885	2177958	+	upstream	-1011	821	Upstream
MYC2_432.AT1G07100	chr1	2177332	2177995	664	*	199	6.92946	19.9944	17.8664	MYC2_432	AT1G07100	2177885	2177958	+	includeFeature	-553	37	Upstream
MYC2_434.AT1G07128	chr1	2188397	2188623	227	*	54	3.26092	5.43708	3.83145	MYC2_434	AT1G07128	2187621	2188417	-	overlapStart	20	20	Upstream
MYC2_436.AT1G07135	chr1	2190392	2191288	897	*	504	12.6361	50.4753	47.9588	MYC2_436	AT1G07135	2189928	2190659	-	overlapStart	267	267	Upstream
MYC2_438.AT1G07150	chr1	2195581	2197112	1532	*	128	5.16409	12.8959	10.9542	MYC2_438	AT1G07150	2193941	2195798	-	overlapStart	217	217	Upstream
MYC2_440.AT1G07160	chr1	2199720	2200063	344	*	38	2.5468	3.89224	2.41926	MYC2_440	AT1G07160	2197908	2199748	-	overlapStart	28	28	Upstream
MYC2_440.AT1G07170	chr1	2199720	2200063	344	*	38	2.5468	3.89224	2.41926	MYC2_440	AT1G07170	2200123	2201265	+	upstream	-403	60	Upstream
MYC2_441.AT1G07175	chr1	2201534	2201851	318	*	53	3.23511	5.38355	3.80647	MYC2_441	AT1G07175	2202330	2202774	+	upstream	-796	479	Upstream
MYC2_442.AT1G07180	chr1	2203681	2204228	548	*	237	7.70714	23.7905	21.5988	MYC2_442	AT1G07180	2204320	2206934	+	upstream	-639	92	Upstream
MYC2_443.AT1G07200	chr1	2212451	2212779	329	*	112	4.89139	11.2129	9.32726	MYC2_443	AT1G07200	2208719	2212546	-	overlapStart	95	95	Upstream
MYC2_444.AT1G07200	chr1	2213018	2213716	699	*	163	6.11251	16.3041	14.2657	MYC2_444	AT1G07200	2208719	2212546	-	upstream	-472	472	Upstream
MYC2_445.AT1G07210	chr1	2214067	2215067	1001	*	97	4.14304	9.73612	7.91095	MYC2_445	AT1G07210	2215223	2216982	+	upstream	-1156	156	Upstream
MYC2_446.AT1G07230	chr1	2223724	2223908	185	*	33	2.49598	3.35793	1.93894	MYC2_446	AT1G07230	2220253	2222982	-	upstream	-742	742	Upstream
MYC2_447.AT1G07270	chr1	2233232	2233577	346	*	71	3.64301	7.18814	5.49365	MYC2_447	AT1G07270	2229757	2232897	-	upstream	-335	335	Upstream
MYC2_448.AT1G07270	chr1	2233858	2234042	185	*	21	2.03808	2.15698	0.872271	MYC2_448	AT1G07270	2229757	2232897	-	upstream	-961	961	Upstream
MYC2_449.AT1G07280	chr1	2235639	2237175	1537	*	784	17.1199	78.4856	75.7283	MYC2_449	AT1G07280	2238087	2241217	+	upstream	-2448	912	Upstream
MYC2_450.AT1G07280	chr1	2237409	2238215	807	*	107	4.55376	10.7529	8.89262	MYC2_450	AT1G07280	2238087	2241217	+	overlapStart	-678	128	Upstream
MYC2_454.AT1G07350	chr1	2260018	2260456	439	*	59	3.3928	5.93057	4.31332	MYC2_454	AT1G07350	2257425	2260101	-	overlapStart	83	83	Upstream
MYC2_455.AT1G07390	chr1	2269465	2269716	252	*	43	2.81238	4.31191	2.79403	MYC2_455	AT1G07390	2269893	2274820	+	upstream	-428	177	Upstream
MYC2_456.AT1G07420	chr1	2277565	2277903	339	*	41	2.52714	4.13593	2.65504	MYC2_456	AT1G07420	2277807	2280297	+	overlapStart	-242	96	Upstream
MYC2_458.AT1G07430	chr1	2282719	2283281	563	*	136	5.50281	13.6902	11.7224	MYC2_458	AT1G07430	2280835	2282828	-	overlapStart	109	109	Upstream
MYC2_459.AT1G07430	chr1	2283387	2283572	186	*	36	2.6495	3.65933	2.19401	MYC2_459	AT1G07430	2280835	2282828	-	upstream	-559	559	Upstream
MYC2_462.AT1G07480	chr1	2299400	2299862	463	*	77	3.89805	7.76547	6.03725	MYC2_462	AT1G07480	2296023	2299470	-	overlapStart	70	70	Upstream
MYC2_463.AT1G07480	chr1	2300127	2300391	265	*	42	2.85331	4.2239	2.70893	MYC2_463	AT1G07480	2296023	2299470	-	upstream	-657	657	Upstream
MYC2_463.AT1G07485	chr1	2300127	2300391	265	*	42	2.85331	4.2239	2.70893	MYC2_463	AT1G07485	2301375	2302121	+	upstream	-1248	984	Upstream
MYC2_464.AT1G07485	chr1	2300947	2301304	358	*	42	2.85331	4.2239	2.70893	MYC2_464	AT1G07485	2301375	2302121	+	upstream	-428	71	Upstream
MYC2_465.AT1G07490	chr1	2302830	2303124	295	*	26	2.24189	2.62363	1.2736	MYC2_465	AT1G07490	2301380	2302021	-	upstream	-809	809	Upstream
MYC2_466.AT1G07500	chr1	2304976	2305526	551	*	676	11.9508	67.6285	64.9747	MYC2_466	AT1G07500	2304766	2305031	-	overlapStart	55	55	Upstream
MYC2_466.AT1G07510	chr1	2304976	2305526	551	*	676	11.9508	67.6285	64.9747	MYC2_466	AT1G07510	2305378	2309544	+	overlapStart	-402	148	Upstream
MYC2_468.AT1G07540	chr1	2321678	2322037	360	*	219	7.33708	21.9141	19.747	MYC2_468	AT1G07540	2318433	2321048	-	upstream	-630	630	Upstream
MYC2_470.AT1G07550	chr1	2327101	2327538	438	*	103	4.67196	10.3862	8.55063	MYC2_470	AT1G07550	2322653	2326561	-	upstream	-540	540	Upstream
MYC2_470.AT1G07560	chr1	2327101	2327538	438	*	103	4.67196	10.3862	8.55063	MYC2_470	AT1G07560	2327320	2331096	+	overlapStart	-219	218	Upstream
MYC2_471.AT1G07570	chr1	2333337	2334545	1209	*	235	7.62199	23.5841	21.3946	MYC2_471	AT1G07570	2331170	2333738	-	overlapStart	401	401	Upstream
MYC2_471.AT1G07580	chr1	2333337	2334545	1209	*	235	7.62199	23.5841	21.3946	MYC2_471	AT1G07580	2334822	2334894	+	upstream	-1485	277	Upstream
MYC2_474.AT1G07590	chr1	2339406	2340192	787	*	279	8.55993	27.9475	25.6778	MYC2_474	AT1G07590	2336523	2339391	-	upstream	-15	15	Upstream
MYC2_474.AT1G07600	chr1	2339406	2340192	787	*	279	8.55993	27.9475	25.6778	MYC2_474	AT1G07600	2338904	2339321	-	upstream	-85	85	Upstream
MYC2_475.AT1G07610	chr1	2340723	2341257	535	*	47	3.02998	4.76175	3.23095	MYC2_475	AT1G07610	2341542	2342123	+	upstream	-819	285	Upstream
MYC2_476.AT1G07620	chr1	2346775	2348300	1526	*	139	5.02409	13.9655	11.9947	MYC2_476	AT1G07620	2344390	2346842	-	overlapStart	67	67	Upstream
MYC2_476.AT1G07630	chr1	2346775	2348300	1526	*	139	5.02409	13.9655	11.9947	MYC2_476	AT1G07630	2349097	2351692	+	upstream	-2322	797	Upstream
MYC2_477.AT1G07630	chr1	2348647	2349181	535	*	109	4.78506	10.9712	9.10787	MYC2_477	AT1G07630	2349097	2351692	+	overlapStart	-450	84	Upstream
MYC2_481.AT1G07650	chr1	2366318	2366871	554	*	74	3.87235	7.44433	5.72108	MYC2_481	AT1G07650	2359549	2366561	-	overlapStart	243	243	Upstream
MYC2_482.AT1G07670	chr1	2374476	2375149	674	*	354	9.98658	35.4474	33.0777	MYC2_482	AT1G07670	2370052	2374545	-	overlapStart	69	69	Upstream
MYC2_482.AT1G07680	chr1	2374476	2375149	674	*	354	9.98658	35.4474	33.0777	MYC2_482	AT1G07680	2376012	2377186	+	upstream	-1536	863	Upstream
MYC2_483.AT1G07710	chr1	2388343	2388679	337	*	112	4.89139	11.2129	9.32726	MYC2_483	AT1G07710	2386275	2387986	-	upstream	-357	357	Upstream
MYC2_487.AT1G07720	chr1	2392289	2392749	461	*	38	2.5944	3.84943	2.37912	MYC2_487	AT1G07720	2390655	2392453	-	overlapStart	164	164	Upstream
MYC2_488.AT1G07720	chr1	2393398	2393827	430	*	54	3.26092	5.43708	3.83145	MYC2_488	AT1G07720	2390655	2392453	-	upstream	-945	945	Upstream
MYC2_489.AT1G07728	chr1	2394385	2394753	369	*	26	2.24189	2.62363	1.2736	MYC2_489	AT1G07728	2395451	2397345	+	upstream	-1066	698	Upstream
MYC2_490.AT1G07750	chr1	2406134	2406420	287	*	24	2.17362	2.49814	1.19516	MYC2_490	AT1G07750	2404037	2405943	-	upstream	-191	191	Upstream
MYC2_491.AT1G07750	chr1	2406703	2407669	967	*	215	7.19195	21.5645	19.4122	MYC2_491	AT1G07750	2404037	2405943	-	upstream	-760	760	Upstream
MYC2_491.AT1G07760	chr1	2406703	2407669	967	*	215	7.19195	21.5645	19.4122	MYC2_491	AT1G07760	2406834	2406905	-	includeFeature	202	131	Upstream
MYC2_492.AT1G07760	chr1	2407782	2408294	513	*	34	2.54615	3.45699	2.03442	MYC2_492	AT1G07760	2406834	2406905	-	upstream	-877	877	Upstream
MYC2_493.AT1G07770	chr1	2409420	2409748	329	*	114	4.5777	11.4505	9.56184	MYC2_493	AT1G07770	2408203	2409580	-	overlapStart	160	160	Upstream
MYC2_494.AT1G07770	chr1	2409958	2410238	281	*	24	2.16186	2.47644	1.17572	MYC2_494	AT1G07770	2408203	2409580	-	upstream	-378	378	Upstream
MYC2_495.AT1G07780	chr1	2412495	2412905	411	*	95	4.16515	9.50283	7.70169	MYC2_495	AT1G07780	2410056	2412677	-	overlapStart	182	182	Upstream
MYC2_495.AT1G07790	chr1	2412495	2412905	411	*	95	4.16515	9.50283	7.70169	MYC2_495	AT1G07790	2412980	2413708	+	upstream	-485	75	Upstream
MYC2_496.AT1G07795	chr1	2414023	2414299	277	*	65	3.46003	6.53178	4.87598	MYC2_496	AT1G07795	2414286	2414967	+	overlapStart	-263	13	Upstream
MYC2_496.AT1G07800	chr1	2414023	2414299	277	*	65	3.46003	6.53178	4.87598	MYC2_496	AT1G07800	2415041	2415970	+	upstream	-1018	742	Upstream
MYC2_497.AT1G07860	chr1	2429518	2429749	232	*	38	2.67001	3.85466	2.38427	MYC2_497	AT1G07860	2428911	2429431	-	upstream	-87	87	Upstream
MYC2_498.AT1G07870	chr1	2432065	2433055	991	*	70	3.48016	7.04284	5.35141	MYC2_498	AT1G07870	2428773	2432057	-	upstream	-8	8	Upstream
MYC2_499.AT1G07885	chr1	2436980	2437658	679	*	230	6.53649	23.0451	20.859	MYC2_499	AT1G07885	2436467	2436959	-	upstream	-21	21	Upstream
MYC2_499.AT1G07890	chr1	2436980	2437658	679	*	230	6.53649	23.0451	20.859	MYC2_499	AT1G07890	2437330	2439665	+	overlapStart	-350	328	Upstream
MYC2_506.AT1G07930	chr1	2456888	2457591	704	*	112	4.89139	11.2129	9.32726	MYC2_506	AT1G07930	2458244	2460790	+	upstream	-1356	653	Upstream
MYC2_512.AT1G07940	chr1	2465287	2465520	234	*	33	2.42967	3.3587	1.939	MYC2_512	AT1G07940	2462953	2465504	-	overlapStart	217	16	Upstream
MYC2_513.AT1G07980	chr1	2474901	2475531	631	*	186	6.37772	18.6498	16.559	MYC2_513	AT1G07980	2473165	2474927	-	overlapStart	26	26	Upstream
MYC2_513.AT1G07985	chr1	2474901	2475531	631	*	186	6.37772	18.6498	16.559	MYC2_513	AT1G07985	2475405	2476155	+	overlapStart	-504	126	Upstream
MYC2_514.AT1G08010	chr1	2488470	2489214	745	*	85	4.1211	8.53963	6.77627	MYC2_514	AT1G08010	2485906	2488027	-	upstream	-443	443	Upstream
MYC2_519.AT1G08115	chr1	2537983	2538246	264	*	36	2.50754	3.66178	2.19642	MYC2_519	AT1G08115	2538076	2538237	-	includeFeature	254	9	Upstream
MYC2_519.AT1G08120	chr1	2537983	2538246	264	*	36	2.50754	3.66178	2.19642	MYC2_519	AT1G08120	2538615	2539661	+	upstream	-632	369	Upstream
MYC2_520.AT1G08125	chr1	2542281	2542503	223	*	20	1.93609	2.05643	0.824037	MYC2_520	AT1G08125	2539614	2542334	-	overlapStart	53	53	Upstream
MYC2_521.AT1G08140	chr1	2555338	2555560	223	*	31	2.44569	3.12521	1.71436	MYC2_521	AT1G08140	2552036	2555161	-	upstream	-177	177	Upstream
MYC2_522.AT1G08180	chr1	2565056	2565779	724	*	96	4.48377	9.64772	7.82338	MYC2_522	AT1G08180	2564572	2565121	-	overlapStart	65	65	Upstream
MYC2_523.AT1G08190	chr1	2567189	2567511	323	*	36	2.6495	3.65933	2.19401	MYC2_523	AT1G08190	2567475	2573393	+	overlapStart	-286	36	Upstream
MYC2_525.AT1G08200	chr1	2576470	2577216	747	*	1782	27.0814	178.261	174.067	MYC2_525	AT1G08200	2573848	2576714	-	overlapStart	244	244	Upstream
MYC2_526.AT1G08210	chr1	2580546	2581003	458	*	105	4.5947	10.5313	8.67413	MYC2_526	AT1G08210	2577020	2580669	-	overlapStart	123	123	Upstream
MYC2_528.AT1G08250	chr1	2590210	2590439	230	*	43	2.56937	4.38842	2.86904	MYC2_528	AT1G08250	2588857	2590301	-	overlapStart	91	91	Upstream
MYC2_528.AT1G08260	chr1	2590210	2590439	230	*	43	2.56937	4.38842	2.86904	MYC2_528	AT1G08260	2590944	2606892	+	upstream	-734	505	Upstream
MYC2_529.AT1G08270	chr1	2607821	2608005	185	*	33	2.49718	3.36031	1.94047	MYC2_529	AT1G08270	2606269	2607507	-	upstream	-314	314	Upstream
MYC2_529.AT1G08280	chr1	2607821	2608005	185	*	33	2.49718	3.36031	1.94047	MYC2_529	AT1G08280	2608408	2609853	+	upstream	-587	403	Upstream
MYC2_530.AT1G08290	chr1	2613290	2613792	503	*	69	3.5549	6.98444	5.29406	MYC2_530	AT1G08290	2609996	2613242	-	upstream	-48	48	Upstream
MYC2_530.AT1G08300	chr1	2613290	2613792	503	*	69	3.5549	6.98444	5.29406	MYC2_530	AT1G08300	2614774	2618823	+	upstream	-1484	982	Upstream
MYC2_531.AT1G08300	chr1	2614439	2614717	279	*	36	2.6495	3.65933	2.19401	MYC2_531	AT1G08300	2614774	2618823	+	upstream	-335	57	Upstream
MYC2_532.AT1G08315	chr1	2621401	2621770	370	*	42	2.85331	4.2239	2.70893	MYC2_532	AT1G08315	2620335	2621545	-	overlapStart	144	144	Upstream
MYC2_534.AT1G08320	chr1	2627700	2627970	271	*	42	2.85331	4.2239	2.70893	MYC2_534	AT1G08320	2621904	2627848	-	overlapStart	148	122	Upstream
MYC2_535.AT1G08370	chr1	2637700	2638235	536	*	44	2.85663	4.40432	2.88432	MYC2_535	AT1G08370	2638181	2640554	+	overlapStart	-481	54	Upstream
MYC2_536.AT1G08420	chr1	2649307	2649505	199	*	41	2.74663	4.17367	2.69111	MYC2_536	AT1G08420	2649537	2657120	+	upstream	-230	32	Upstream
MYC2_537.AT1G08440	chr1	2662233	2662449	217	*	36	2.6495	3.65933	2.19401	MYC2_537	AT1G08440	2663027	2665343	+	upstream	-794	578	Upstream
MYC2_542.AT1G08490	chr1	2688700	2688971	272	*	51	3.01875	5.11862	3.54965	MYC2_542	AT1G08490	2685659	2688595	-	upstream	-105	105	Upstream
MYC2_542.AT1G08500	chr1	2688700	2688971	272	*	51	3.01875	5.11862	3.54965	MYC2_542	AT1G08500	2689016	2690045	+	upstream	-316	45	Upstream
MYC2_545.AT1G08510	chr1	2694403	2695510	1108	*	238	7.74469	23.8811	21.6779	MYC2_545	AT1G08510	2691080	2694377	-	upstream	-26	26	Upstream
MYC2_545.AT1G08520	chr1	2694403	2695510	1108	*	238	7.74469	23.8811	21.6779	MYC2_545	AT1G08520	2696412	2700959	+	upstream	-2009	902	Upstream
MYC2_546.AT1G08560	chr1	2710940	2711303	364	*	71	3.73884	7.15378	5.4603	MYC2_546	AT1G08560	2709632	2710912	-	upstream	-28	28	Upstream
MYC2_547.AT1G08570	chr1	2712110	2712376	267	*	80	4.03998	8.07923	6.34558	MYC2_547	AT1G08570	2712883	2714734	+	upstream	-773	507	Upstream
MYC2_548.AT1G08570	chr1	2712859	2713043	185	*	28	2.25612	2.87716	1.51523	MYC2_548	AT1G08570	2712883	2714734	+	overlapStart	-24	24	Upstream
MYC2_550.AT1G08610	chr1	2735743	2735981	239	*	34	2.5202	3.40583	1.98475	MYC2_550	AT1G08610	2733657	2735819	-	overlapStart	76	76	Upstream
MYC2_550.AT1G08620	chr1	2735743	2735981	239	*	34	2.5202	3.40583	1.98475	MYC2_550	AT1G08620	2736774	2743758	+	upstream	-1031	793	Upstream
MYC2_553.AT1G08630	chr1	2747851	2748337	487	*	47	2.65574	4.76492	3.23405	MYC2_553	AT1G08630	2743761	2747967	-	overlapStart	116	116	Upstream
MYC2_554.AT1G08640	chr1	2751950	2752185	236	*	48	3.05712	4.81704	3.25478	MYC2_554	AT1G08640	2748398	2751278	-	upstream	-672	672	Upstream
MYC2_554.AT1G08650	chr1	2751950	2752185	236	*	48	3.05712	4.81704	3.25478	MYC2_554	AT1G08650	2752154	2753703	+	overlapStart	-204	31	Upstream
MYC2_559.AT1G08660	chr1	2759655	2760106	452	*	300	8.96754	30.0428	27.7424	MYC2_559	AT1G08660	2757041	2759794	-	overlapStart	139	139	Upstream
MYC2_560.AT1G08660	chr1	2760694	2760999	306	*	422	11.2094	42.2201	39.7773	MYC2_560	AT1G08660	2757041	2759794	-	upstream	-900	900	Upstream
MYC2_561.AT1G08670	chr1	2762385	2762677	293	*	31	2.44569	3.12521	1.71436	MYC2_561	AT1G08670	2760346	2761573	-	upstream	-812	812	Upstream
MYC2_561.AT1G08680	chr1	2762385	2762677	293	*	31	2.44569	3.12521	1.71436	MYC2_561	AT1G08680	2762584	2768967	+	overlapStart	-199	93	Upstream
MYC2_563.AT1G08800	chr1	2818044	2818648	605	*	48	3.05712	4.81704	3.25478	MYC2_563	AT1G08800	2813061	2818008	-	upstream	-36	36	Upstream
MYC2_565.AT1G08830	chr1	2826899	2827238	340	*	59	3.2787	5.90079	4.28425	MYC2_565	AT1G08830	2827061	2829315	+	overlapStart	-162	162	Upstream
MYC2_566.AT1G08860	chr1	2841114	2841514	401	*	376	10.3942	37.6717	35.2765	MYC2_566	AT1G08860	2842153	2846138	+	upstream	-1039	639	Upstream
MYC2_567.AT1G08860	chr1	2841742	2842123	382	*	25	2.21638	2.57683	1.26903	MYC2_567	AT1G08860	2842153	2846138	+	upstream	-411	30	Upstream
MYC2_569.AT1G08870	chr1	2846352	2846610	259	*	31	2.28017	3.16169	1.7494	MYC2_569	AT1G08870	2846536	2846608	-	includeFeature	256	2	Upstream
MYC2_570.AT1G08870	chr1	2847563	2847786	224	*	26	2.08504	2.6249	1.27461	MYC2_570	AT1G08870	2846536	2846608	-	upstream	-955	955	Upstream
MYC2_570.AT1G08890	chr1	2847563	2847786	224	*	26	2.08504	2.6249	1.27461	MYC2_570	AT1G08890	2848348	2852270	+	upstream	-785	562	Upstream
MYC2_571.AT1G08880	chr1	2848127	2848311	185	*	31	2.44569	3.12521	1.71436	MYC2_571	AT1G08880	2846949	2847800	-	upstream	-327	327	Upstream
MYC2_571.AT1G08890	chr1	2848127	2848311	185	*	31	2.44569	3.12521	1.71436	MYC2_571	AT1G08890	2848348	2852270	+	upstream	-221	37	Upstream
MYC2_572.AT1G08910	chr1	2855822	2856408	587	*	66	3.63231	6.67457	5.01536	MYC2_572	AT1G08910	2856227	2861170	+	overlapStart	-405	181	Upstream
MYC2_578.AT1G08920	chr1	2866482	2867906	1425	*	354	9.98658	35.4474	33.0777	MYC2_578	AT1G08920	2867259	2870656	+	overlapStart	-777	647	Upstream
MYC2_580.AT1G08930	chr1	2872398	2872967	570	*	190	6.72566	19.0532	16.9457	MYC2_580	AT1G08930	2873465	2877270	+	upstream	-1067	498	Upstream
MYC2_581.AT1G08930	chr1	2873176	2873799	624	*	48	3.05712	4.81704	3.25478	MYC2_581	AT1G08930	2873465	2877270	+	overlapStart	-289	289	Upstream
MYC2_586.AT1G08940	chr1	2876847	2877725	879	*	54	3.26092	5.43708	3.83145	MYC2_586	AT1G08940	2877692	2879169	+	overlapStart	-845	33	Upstream
MYC2_587.AT1G08950	chr1	2879233	2879537	305	*	20	1.97798	2.05086	0.818728	MYC2_587	AT1G08950	2879303	2879374	+	includeFeature	-70	70	Upstream
MYC2_587.AT1G08960	chr1	2879233	2879537	305	*	20	1.97798	2.05086	0.818728	MYC2_587	AT1G08960	2879642	2882231	+	upstream	-409	105	Upstream
MYC2_588.AT1G08970	chr1	2882417	2882708	292	*	47	3.03292	4.76774	3.23599	MYC2_588	AT1G08970	2882524	2884337	+	overlapStart	-107	107	Upstream
MYC2_589.AT1G08980	chr1	2884193	2884535	343	*	96	4.48377	9.64772	7.82338	MYC2_589	AT1G08980	2884411	2886620	+	overlapStart	-218	124	Upstream
MYC2_590.AT1G08990	chr1	2888273	2888457	185	*	17	1.83427	1.72792	0.517312	MYC2_590	AT1G08990	2888753	2890959	+	upstream	-480	296	Upstream
MYC2_591.AT1G09060	chr1	2925934	2926214	281	*	19	1.94333	1.98953	0.762698	MYC2_591	AT1G09060	2921064	2925762	-	upstream	-172	172	Upstream
MYC2_592.AT1G09060	chr1	2926662	2927004	343	*	134	4.97165	13.4756	11.5272	MYC2_592	AT1G09060	2921064	2925762	-	upstream	-900	900	Upstream
MYC2_592.AT1G09070	chr1	2926662	2927004	343	*	134	4.97165	13.4756	11.5272	MYC2_592	AT1G09070	2927703	2928968	+	upstream	-1041	699	Upstream
MYC2_593.AT1G09070	chr1	2927259	2927739	481	*	126	5.19418	12.6066	10.6856	MYC2_593	AT1G09070	2927703	2928968	+	overlapStart	-444	36	Upstream
MYC2_595.AT1G09100	chr1	2939360	2939668	309	*	81	3.81806	8.10779	6.37213	MYC2_595	AT1G09100	2936528	2939326	-	upstream	-34	34	Upstream
MYC2_595.AT1G09110	chr1	2939360	2939668	309	*	81	3.81806	8.10779	6.37213	MYC2_595	AT1G09110	2939417	2939488	+	includeFeature	-57	57	Upstream
MYC2_597.AT1G09155	chr1	2951089	2951576	488	*	37	2.48355	3.74878	2.28033	MYC2_597	AT1G09155	2949676	2950989	-	upstream	-100	100	Upstream
MYC2_598.AT1G09180	chr1	2964661	2965064	404	*	163	5.51029	16.3871	14.3443	MYC2_598	AT1G09180	2965023	2965972	+	overlapStart	-362	41	Upstream
MYC2_599.AT1G09210	chr1	2976853	2977272	420	*	122	4.78078	12.2966	10.3798	MYC2_599	AT1G09210	2972842	2976750	-	upstream	-103	103	Upstream
MYC2_600.AT1G09230	chr1	2982456	2983298	843	*	67	3.66854	6.75201	5.06605	MYC2_600	AT1G09230	2979520	2982624	-	overlapStart	168	168	Upstream
MYC2_601.AT1G09240	chr1	2983720	2984267	548	*	48	3.05712	4.81704	3.25478	MYC2_601	AT1G09240	2984881	2986130	+	upstream	-1161	614	Upstream
MYC2_602.AT1G09245	chr1	2988110	2989077	968	*	112	4.89139	11.2129	9.32726	MYC2_602	AT1G09245	2986939	2987393	-	upstream	-717	717	Upstream
MYC2_602.AT1G09250	chr1	2988110	2989077	968	*	112	4.89139	11.2129	9.32726	MYC2_602	AT1G09250	2989378	2990357	+	upstream	-1268	301	Upstream
MYC2_604.AT1G09270	chr1	2994233	2994418	186	*	41	2.83072	4.17882	2.69539	MYC2_604	AT1G09270	2994369	2998222	+	overlapStart	-136	49	Upstream
MYC2_605.AT1G09310	chr1	3008362	3008580	219	*	62	3.42632	6.22789	4.57863	MYC2_605	AT1G09310	3009055	3009880	+	upstream	-693	475	Upstream
MYC2_607.AT1G09350	chr1	3018391	3019154	764	*	48	3.05712	4.81704	3.25478	MYC2_607	AT1G09350	3019819	3021441	+	upstream	-1428	665	Upstream
MYC2_608.AT1G09350	chr1	3019265	3019703	439	*	22	1.93611	2.21883	0.9314	MYC2_608	AT1G09350	3019819	3021441	+	upstream	-554	116	Upstream
MYC2_609.AT1G09390	chr1	3030969	3031171	203	*	50	3.0883	5.0759	3.50744	MYC2_609	AT1G09390	3031203	3033582	+	upstream	-234	32	Upstream
MYC2_611.AT1G09415	chr1	3038325	3038611	287	*	76	3.43513	7.62298	5.89714	MYC2_611	AT1G09415	3037754	3038408	-	overlapStart	83	83	Upstream
MYC2_611.AT1G09421	chr1	3038325	3038611	287	*	76	3.43513	7.62298	5.89714	MYC2_611	AT1G09421	3038631	3039326	+	upstream	-306	20	Upstream
MYC2_613.AT1G09470	chr1	3056888	3057759	872	*	289	8.76373	28.9902	26.7052	MYC2_613	AT1G09470	3055231	3057443	-	overlapStart	555	316	Upstream
MYC2_613.AT1G09480	chr1	3056888	3057759	872	*	289	8.76373	28.9902	26.7052	MYC2_613	AT1G09480	3057975	3060661	+	upstream	-1087	216	Upstream
MYC2_614.AT1G09500	chr1	3066504	3066808	305	*	181	6.52185	18.1248	16.038	MYC2_614	AT1G09500	3066699	3068598	+	overlapStart	-195	109	Upstream
MYC2_615.AT1G09520	chr1	3072408	3073266	859	*	825	17.7313	82.5144	79.7145	MYC2_615	AT1G09520	3070946	3072050	-	upstream	-358	358	Upstream
MYC2_616.AT1G09530	chr1	3075473	3075826	354	*	77	3.5701	7.74266	6.01469	MYC2_616	AT1G09530	3076582	3079539	+	upstream	-1109	756	Upstream
MYC2_617.AT1G09530	chr1	3076224	3076922	699	*	85	3.8057	8.5997	6.83405	MYC2_617	AT1G09530	3076582	3079539	+	overlapStart	-358	340	Upstream
MYC2_621.AT1G09540	chr1	3085891	3086127	237	*	48	3.05712	4.81704	3.25478	MYC2_621	AT1G09540	3086159	3087912	+	upstream	-268	32	Upstream
MYC2_622.AT1G09560	chr1	3093569	3093867	299	*	89	3.92983	8.91626	7.12396	MYC2_622	AT1G09560	3093839	3094864	+	overlapStart	-270	28	Upstream
MYC2_623.AT1G09570	chr1	3100212	3100530	319	*	65	3.11029	6.52327	4.86759	MYC2_623	AT1G09570	3095256	3100357	-	overlapStart	145	145	Upstream
MYC2_624.AT1G09570	chr1	3100732	3100985	254	*	111	4.71385	11.1361	9.27038	MYC2_624	AT1G09570	3095256	3100357	-	upstream	-375	375	Upstream
MYC2_625.AT1G09570	chr1	3101176	3101621	446	*	33	2.49358	3.35319	1.93425	MYC2_625	AT1G09570	3095256	3100357	-	upstream	-819	819	Upstream
MYC2_626.AT1G09575	chr1	3102775	3103597	823	*	40	2.75552	4.02789	2.55007	MYC2_626	AT1G09575	3101671	3102925	-	overlapStart	150	150	Upstream
MYC2_626.AT1G09580	chr1	3102775	3103597	823	*	40	2.75552	4.02789	2.55007	MYC2_626	AT1G09580	3104588	3106290	+	upstream	-1813	991	Upstream
MYC2_627.AT1G09580	chr1	3104206	3104462	257	*	102	4.59485	10.2121	8.37981	MYC2_627	AT1G09580	3104588	3106290	+	upstream	-382	126	Upstream
MYC2_628.AT1G09600	chr1	3107646	3108002	357	*	31	2.36795	3.10279	1.71436	MYC2_628	AT1G09600	3108617	3111318	+	upstream	-971	615	Upstream
MYC2_629.AT1G09645	chr1	3122338	3122836	499	*	142	5.58257	14.2587	12.285	MYC2_629	AT1G09645	3122956	3124578	+	upstream	-618	120	Upstream
MYC2_630.AT1G09650	chr1	3124921	3125401	481	*	41	2.80951	4.13638	2.65546	MYC2_630	AT1G09650	3125807	3127284	+	upstream	-886	406	Upstream
MYC2_631.AT1G09660	chr1	3131385	3131570	186	*	53	3.20283	5.31636	3.74145	MYC2_631	AT1G09660	3127771	3131094	-	upstream	-291	291	Upstream
MYC2_632.AT1G09680	chr1	3135999	3136298	300	*	29	2.34111	2.92611	1.56229	MYC2_632	AT1G09680	3134107	3135930	-	upstream	-69	69	Upstream
MYC2_633.AT1G09750	chr1	3156907	3157142	236	*	30	2.35344	3.07366	1.70238	MYC2_633	AT1G09750	3157501	3159148	+	upstream	-594	359	Upstream
MYC2_635.AT1G09780	chr1	3167808	3168156	349	*	264	8.17855	26.4811	24.2401	MYC2_635	AT1G09780	3165370	3167869	-	overlapStart	61	61	Upstream
MYC2_636.AT1G09800	chr1	3180550	3180909	360	*	70	3.59947	7.08777	5.39585	MYC2_636	AT1G09800	3176883	3180421	-	upstream	-129	129	Upstream
MYC2_638.AT1G09840	chr1	3201078	3201830	753	*	336	8.85095	33.6495	31.3046	MYC2_638	AT1G09840	3195824	3200291	-	upstream	-787	787	Upstream
MYC2_638.AT1G09850	chr1	3201078	3201830	753	*	336	8.85095	33.6495	31.3046	MYC2_638	AT1G09850	3201799	3204150	+	overlapStart	-721	31	Upstream
MYC2_639.AT1G09940	chr1	3239345	3240733	1389	*	145	5.70662	14.5479	12.5546	MYC2_639	AT1G09940	3236995	3239554	-	overlapStart	209	209	Upstream
MYC2_640.AT1G09950	chr1	3241692	3242412	721	*	169	6.21482	16.9658	14.9178	MYC2_640	AT1G09950	3240606	3241632	-	upstream	-60	60	Upstream
MYC2_641.AT1G09950	chr1	3242631	3243160	530	*	365	10.1904	36.5553	34.1722	MYC2_641	AT1G09950	3240606	3241632	-	upstream	-999	999	Upstream
MYC2_642.AT1G09960	chr1	3243878	3244175	298	*	54	3.26092	5.43708	3.83145	MYC2_642	AT1G09960	3244213	3247200	+	upstream	-335	38	Upstream
MYC2_646.AT1G09970	chr1	3251481	3251725	245	*	31	2.44569	3.12521	1.71436	MYC2_646	AT1G09970	3252240	3255693	+	upstream	-759	515	Upstream
MYC2_647.AT1G09970	chr1	3251969	3252574	606	*	181	6.52185	18.1248	16.038	MYC2_647	AT1G09970	3252240	3255693	+	overlapStart	-271	271	Upstream
MYC2_650.AT1G09980	chr1	3261594	3261851	258	*	21	2.02716	2.13774	0.872271	MYC2_650	AT1G09980	3256245	3261614	-	overlapStart	20	20	Upstream
MYC2_651.AT1G09980	chr1	3262402	3262694	293	*	102	4.4827	10.2681	8.43425	MYC2_651	AT1G09980	3256245	3261614	-	upstream	-788	788	Upstream
MYC2_652.AT1G09995	chr1	3263580	3263798	219	*	42	2.85331	4.2239	2.70893	MYC2_652	AT1G09995	3262265	3263612	-	overlapStart	32	32	Upstream
MYC2_653.AT1G10020	chr1	3272095	3272319	225	*	21	2.03808	2.15698	0.872271	MYC2_653	AT1G10020	3269604	3271987	-	upstream	-108	108	Upstream
MYC2_654.AT1G10020	chr1	3272426	3272795	370	*	132	5.31309	13.2487	11.3029	MYC2_654	AT1G10020	3269604	3271987	-	upstream	-439	439	Upstream
MYC2_655.AT1G10030	chr1	3273338	3273548	211	*	41	2.84091	4.19918	2.70893	MYC2_655	AT1G10030	3273825	3275837	+	upstream	-487	277	Upstream
MYC2_656.AT1G10040	chr1	3278627	3278916	290	*	97	4.40537	9.77805	7.95183	MYC2_656	AT1G10040	3275891	3278697	-	overlapStart	70	70	Upstream
MYC2_656.AT1G10050	chr1	3278627	3278916	290	*	97	4.40537	9.77805	7.95183	MYC2_656	AT1G10050	3279270	3283482	+	upstream	-643	354	Upstream
MYC2_657.AT1G10060	chr1	3283646	3284105	460	*	41	2.79407	4.10542	2.62597	MYC2_657	AT1G10060	3284239	3287107	+	upstream	-593	134	Upstream
MYC2_658.AT1G10070	chr1	3287187	3287820	634	*	305	7.44101	30.5299	28.227	MYC2_658	AT1G10070	3288087	3290471	+	upstream	-900	267	Upstream
MYC2_659.AT1G10090	chr1	3295809	3296733	925	*	171	5.80523	17.179	15.1288	MYC2_659	AT1G10090	3290311	3296198	-	overlapStart	389	389	Upstream
MYC2_660.AT1G10120	chr1	3306615	3306834	220	*	26	2.24189	2.62363	1.2736	MYC2_660	AT1G10120	3304039	3306824	-	overlapStart	209	10	Upstream
MYC2_661.AT1G10130	chr1	3309895	3310079	185	*	30	2.42633	3.08851	1.71436	MYC2_661	AT1G10130	3310930	3322213	+	upstream	-1035	851	Upstream
MYC2_662.AT1G10140	chr1	3323328	3324907	1580	*	374	10.2863	37.4038	35.0175	MYC2_662	AT1G10140	3322802	3323548	-	overlapStart	220	220	Upstream
MYC2_662.AT1G10150	chr1	3323328	3324907	1580	*	374	10.2863	37.4038	35.0175	MYC2_662	AT1G10150	3325824	3327614	+	upstream	-2496	917	Upstream
MYC2_663.AT1G10150	chr1	3325412	3325609	198	*	39	2.6636	3.99755	2.52215	MYC2_663	AT1G10150	3325824	3327614	+	upstream	-412	215	Upstream
MYC2_664.AT1G10150	chr1	3325781	3325982	202	*	71	3.64301	7.18814	5.49365	MYC2_664	AT1G10150	3325824	3327614	+	overlapStart	-43	43	Upstream
MYC2_665.AT1G10200	chr1	3347718	3349239	1522	*	60	3.46473	6.08252	4.43613	MYC2_665	AT1G10200	3346390	3347885	-	overlapStart	167	167	Upstream
MYC2_665.AT1G10210	chr1	3347718	3349239	1522	*	60	3.46473	6.08252	4.43613	MYC2_665	AT1G10210	3349219	3351180	+	overlapStart	-1501	20	Upstream
MYC2_667.AT1G10300	chr1	3377588	3377870	283	*	20	1.90285	2.07148	0.837767	MYC2_667	AT1G10300	3378142	3380226	+	upstream	-554	272	Upstream
MYC2_668.AT1G10360	chr1	3396802	3397206	405	*	443	10.1494	44.3754	41.9177	MYC2_668	AT1G10360	3395558	3396849	-	overlapStart	47	47	Upstream
MYC2_669.AT1G10370	chr1	3398328	3399036	709	*	172	6.31804	17.2096	15.1446	MYC2_669	AT1G10370	3397081	3398358	-	overlapStart	30	30	Upstream
MYC2_671.AT1G10390	chr1	3412987	3413332	346	*	17	1.8226	1.70831	0.517312	MYC2_671	AT1G10390	3407024	3412843	-	upstream	-144	144	Upstream
MYC2_672.AT1G10400	chr1	3416252	3416457	206	*	60	3.36203	6.08616	4.43897	MYC2_672	AT1G10400	3414852	3416358	-	overlapStart	106	99	Upstream
MYC2_673.AT1G10410	chr1	3419207	3419770	564	*	112	4.89139	11.2129	9.32726	MYC2_673	AT1G10410	3416680	3419639	-	overlapStart	432	131	Upstream
MYC2_674.AT1G10410	chr1	3419885	3421511	1627	*	590	14.0627	59.071	56.485	MYC2_674	AT1G10410	3416680	3419639	-	upstream	-246	246	Upstream
MYC2_677.AT1G10430	chr1	3431123	3431419	297	*	67	3.55068	6.73636	5.06605	MYC2_677	AT1G10430	3428478	3430633	-	upstream	-490	490	Upstream
MYC2_677.AT1G10440	chr1	3431123	3431419	297	*	67	3.55068	6.73636	5.06605	MYC2_677	AT1G10440	3431185	3431256	-	includeFeature	133	62	Upstream
MYC2_677.AT1G10450	chr1	3431123	3431419	297	*	67	3.55068	6.73636	5.06605	MYC2_677	AT1G10450	3431780	3438370	+	upstream	-657	361	Upstream
MYC2_678.AT1G10460	chr1	3440738	3441014	277	*	67	3.66854	6.75201	5.06605	MYC2_678	AT1G10460	3439322	3440320	-	upstream	-418	418	Upstream
MYC2_681.AT1G10470	chr1	3443931	3444330	400	*	67	3.66854	6.75201	5.06605	MYC2_681	AT1G10470	3442327	3443957	-	overlapStart	26	26	Upstream
MYC2_682.AT1G10470	chr1	3444493	3444921	429	*	136	5.50281	13.6902	11.7224	MYC2_682	AT1G10470	3442327	3443957	-	upstream	-536	536	Upstream
MYC2_683.AT1G10522	chr1	3469457	3469681	225	*	47	3.0392	4.78056	3.2485	MYC2_683	AT1G10522	3469580	3471488	+	overlapStart	-123	101	Upstream
MYC2_684.AT1G10530	chr1	3472575	3473059	485	*	117	4.6858	11.7242	9.83206	MYC2_684	AT1G10530	3471456	3472672	-	overlapStart	97	97	Upstream
MYC2_685.AT1G10550	chr1	3480970	3481170	201	*	54	3.26092	5.43708	3.83145	MYC2_685	AT1G10550	3479153	3480988	-	overlapStart	18	18	Upstream
MYC2_686.AT1G10550	chr1	3481586	3482282	697	*	81	4.07615	8.15838	6.39981	MYC2_686	AT1G10550	3479153	3480988	-	upstream	-598	598	Upstream
MYC2_687.AT1G10560	chr1	3483456	3484617	1162	*	628	14.6742	62.8503	60.2333	MYC2_687	AT1G10560	3484580	3486965	+	overlapStart	-1124	37	Upstream
MYC2_689.AT1G10580	chr1	3493795	3494647	853	*	45	2.92353	4.54314	3.01935	MYC2_689	AT1G10580	3491281	3493737	-	upstream	-58	58	Upstream
MYC2_690.AT1G10585	chr1	3494759	3496759	2001	*	653	15.0818	65.3999	62.7619	MYC2_690	AT1G10585	3493940	3495144	-	overlapStart	385	385	Upstream
MYC2_691.AT1G10586	chr1	3500094	3500278	185	*	36	2.6495	3.65933	2.19401	MYC2_691	AT1G10586	3496928	3499439	-	upstream	-655	655	Upstream
MYC2_691.AT1G10588	chr1	3500094	3500278	185	*	36	2.6495	3.65933	2.19401	MYC2_691	AT1G10588	3501145	3501904	+	upstream	-1051	867	Upstream
MYC2_692.AT1G10588	chr1	3500455	3500888	434	*	163	6.11423	16.3081	14.2657	MYC2_692	AT1G10588	3501145	3501904	+	upstream	-690	257	Upstream
MYC2_693.AT1G10630	chr1	3514626	3514892	267	*	27	2.24135	2.73431	1.37874	MYC2_693	AT1G10630	3512795	3514729	-	overlapStart	103	103	Upstream
MYC2_694.AT1G10640	chr1	3518547	3518731	185	*	26	2.24189	2.62363	1.2736	MYC2_694	AT1G10640	3515365	3517888	-	upstream	-659	659	Upstream
MYC2_696.AT1G10650	chr1	3526783	3526967	185	*	26	2.24189	2.62363	1.2736	MYC2_696	AT1G10650	3524018	3526346	-	upstream	-437	437	Upstream
MYC2_696.AT1G10652	chr1	3526783	3526967	185	*	26	2.24189	2.62363	1.2736	MYC2_696	AT1G10652	3527709	3527831	+	upstream	-926	742	Upstream
MYC2_697.AT1G10652	chr1	3527482	3527827	346	*	74	3.64451	7.43817	5.72108	MYC2_697	AT1G10652	3527709	3527831	+	overlapStart	-227	4	Upstream
MYC2_698.AT1G10657	chr1	3530150	3530640	491	*	190	6.72566	19.0532	16.9457	MYC2_698	AT1G10657	3530467	3531842	+	overlapStart	-317	173	Upstream
MYC2_699.AT1G10670	chr1	3534963	3535173	211	*	34	2.55815	3.4806	2.05653	MYC2_699	AT1G10670	3535383	3538439	+	upstream	-420	210	Upstream
MYC2_705.AT1G10690	chr1	3550626	3550950	325	*	110	4.66948	11.0306	9.16623	MYC2_705	AT1G10690	3549992	3550632	-	overlapStart	6	6	Upstream
MYC2_706.AT1G10700	chr1	3552778	3553221	444	*	88	4.27996	8.89315	7.10093	MYC2_706	AT1G10700	3554104	3556503	+	upstream	-1326	883	Upstream
MYC2_707.AT1G10700	chr1	3553460	3554229	770	*	282	8.46158	28.2451	25.9733	MYC2_707	AT1G10700	3554104	3556503	+	overlapStart	-644	125	Upstream
MYC2_708.AT1G10705	chr1	3556696	3556902	207	*	17	1.83427	1.72792	0.517312	MYC2_708	AT1G10705	3557114	3557457	+	upstream	-418	212	Upstream
MYC2_709.AT1G10710	chr1	3557946	3558130	185	*	42	2.85331	4.2239	2.70893	MYC2_709	AT1G10710	3558358	3561634	+	upstream	-412	228	Upstream
MYC2_710.AT1G10740	chr1	3570627	3571079	453	*	31	2.36795	3.10279	1.71436	MYC2_710	AT1G10740	3567905	3570838	-	overlapStart	211	211	Upstream
MYC2_712.AT1G10760	chr1	3590331	3591475	1145	*	279	8.55993	27.9475	25.6778	MYC2_712	AT1G10760	3581034	3590928	-	overlapStart	597	547	Upstream
MYC2_713.AT1G10760	chr1	3591691	3592079	389	*	31	2.44569	3.12521	1.71436	MYC2_713	AT1G10760	3581034	3590928	-	upstream	-763	763	Upstream
MYC2_715.AT1G10840	chr1	3611199	3611978	780	*	40	2.66618	4.00304	2.52665	MYC2_715	AT1G10840	3607631	3610520	-	upstream	-679	679	Upstream
MYC2_715.AT1G10850	chr1	3611199	3611978	780	*	40	2.66618	4.00304	2.52665	MYC2_715	AT1G10850	3611747	3614613	+	overlapStart	-548	231	Upstream
MYC2_717.AT1G10900	chr1	3637833	3638017	185	*	21	2.03808	2.15698	0.872271	MYC2_717	AT1G10900	3632234	3637141	-	upstream	-692	692	Upstream
MYC2_719.AT1G10910	chr1	3639113	3639750	638	*	128	5.299	12.8481	10.9066	MYC2_719	AT1G10910	3639878	3644162	+	upstream	-765	128	Upstream
MYC2_720.AT1G10940	chr1	3658588	3659037	450	*	80	3.89528	8.0257	6.29271	MYC2_720	AT1G10940	3655777	3658608	-	overlapStart	20	20	Upstream
MYC2_720.AT1G10950	chr1	3658588	3659037	450	*	80	3.89528	8.0257	6.29271	MYC2_720	AT1G10950	3659209	3663984	+	upstream	-621	172	Upstream
MYC2_721.AT1G10960	chr1	3663898	3664357	460	*	133	5.20579	13.3577	11.4109	MYC2_721	AT1G10960	3664386	3665039	+	upstream	-488	29	Upstream
MYC2_722.AT1G10990	chr1	3671063	3671392	330	*	54	3.26092	5.43708	3.83145	MYC2_722	AT1G10990	3670278	3671187	-	overlapStart	124	124	Upstream
MYC2_723.AT1G11000	chr1	3676451	3676820	370	*	250	6.59863	25.0264	22.8054	MYC2_723	AT1G11000	3671756	3675979	-	upstream	-472	472	Upstream
MYC2_723.AT1G11010	chr1	3676451	3676820	370	*	250	6.59863	25.0264	22.8054	MYC2_723	AT1G11010	3676607	3676644	+	includeFeature	-156	156	Upstream
MYC2_723.AT1G11020	chr1	3676451	3676820	370	*	250	6.59863	25.0264	22.8054	MYC2_723	AT1G11020	3676691	3678524	+	overlapStart	-240	129	Upstream
MYC2_725.AT1G11040	chr1	3681495	3682013	519	*	315	8.70146	31.5838	29.2665	MYC2_725	AT1G11040	3679225	3680924	-	upstream	-571	571	Upstream
MYC2_725.AT1G11050	chr1	3681495	3682013	519	*	315	8.70146	31.5838	29.2665	MYC2_725	AT1G11050	3681888	3684169	+	overlapStart	-393	125	Upstream
MYC2_728.AT1G11130	chr1	3722726	3722913	188	*	42	2.80169	4.2895	2.77186	MYC2_728	AT1G11130	3722857	3727450	+	overlapStart	-131	56	Upstream
MYC2_729.AT1G11160	chr1	3732027	3732499	473	*	199	6.92946	19.9944	17.8664	MYC2_729	AT1G11160	3733139	3739842	+	upstream	-1112	640	Upstream
MYC2_730.AT1G11160	chr1	3732802	3733278	477	*	88	4.27996	8.89315	7.10093	MYC2_730	AT1G11160	3733139	3739842	+	overlapStart	-337	139	Upstream
MYC2_731.AT1G11170	chr1	3740367	3740581	215	*	36	2.6495	3.65933	2.19401	MYC2_731	AT1G11170	3740765	3744675	+	upstream	-398	184	Upstream
MYC2_732.AT1G11185	chr1	3748405	3749505	1101	*	578	13.8589	57.8236	55.2477	MYC2_732	AT1G11185	3749510	3750035	+	upstream	-1105	5	Upstream
MYC2_736.AT1G11210	chr1	3757062	3757450	389	*	127	4.97686	12.7924	10.8688	MYC2_736	AT1G11210	3755677	3756998	-	upstream	-64	64	Upstream
MYC2_741.AT1G11220	chr1	3761290	3761613	324	*	26	2.24189	2.62363	1.2736	MYC2_741	AT1G11220	3759862	3761165	-	upstream	-125	125	Upstream
MYC2_742.AT1G11230	chr1	3764763	3765234	472	*	49	3.02974	4.95166	3.38663	MYC2_742	AT1G11230	3763268	3764483	-	upstream	-280	280	Upstream
MYC2_747.AT1G11260	chr1	3775770	3776849	1080	*	136	5.50281	13.6902	11.7224	MYC2_747	AT1G11260	3777328	3780337	+	upstream	-1558	479	Upstream
MYC2_749.AT1G11265	chr1	3780851	3781083	233	*	43	2.8137	4.31467	2.79668	MYC2_749	AT1G11265	3781235	3785293	+	upstream	-384	152	Upstream
MYC2_751.AT1G11310	chr1	3804026	3804342	317	*	71	3.35738	7.18817	5.49365	MYC2_751	AT1G11310	3800738	3804185	-	overlapStart	159	157	Upstream
MYC2_752.AT1G11320	chr1	3805707	3806382	676	*	128	5.299	12.8481	10.9066	MYC2_752	AT1G11320	3807128	3808875	+	upstream	-1421	746	Upstream
MYC2_753.AT1G11320	chr1	3806620	3806833	214	*	21	2.03808	2.15698	0.872271	MYC2_753	AT1G11320	3807128	3808875	+	upstream	-508	295	Upstream
MYC2_754.AT1G11330	chr1	3808988	3810408	1421	*	327	8.93954	32.771	30.4389	MYC2_754	AT1G11330	3810093	3813607	+	overlapStart	-1105	315	Upstream
MYC2_757.AT1G11370	chr1	3831196	3831718	523	*	145	5.70662	14.5479	12.5546	MYC2_757	AT1G11370	3828098	3830945	-	upstream	-251	251	Upstream
MYC2_757.AT1G11380	chr1	3831196	3831718	523	*	145	5.70662	14.5479	12.5546	MYC2_757	AT1G11380	3832623	3834191	+	upstream	-1427	905	Upstream
MYC2_758.AT1G11380	chr1	3832396	3832663	268	*	41	2.84091	4.19918	2.70893	MYC2_758	AT1G11380	3832623	3834191	+	overlapStart	-227	40	Upstream
MYC2_759.AT1G11390	chr1	3837482	3837978	497	*	43	2.62752	4.3817	2.8628	MYC2_759	AT1G11390	3834459	3837629	-	overlapStart	147	147	Upstream
MYC2_759.AT1G11400	chr1	3837482	3837978	497	*	43	2.62752	4.3817	2.8628	MYC2_759	AT1G11400	3837821	3840207	+	overlapStart	-339	157	Upstream
MYC2_760.AT1G11410	chr1	3841025	3841226	202	*	18	1.82294	1.84387	0.626493	MYC2_760	AT1G11410	3841286	3844432	+	upstream	-261	60	Upstream
MYC2_761.AT1G11440	chr1	3849018	3849444	427	*	554	11.4864	55.402	52.8456	MYC2_761	AT1G11440	3849360	3850662	+	overlapStart	-342	84	Upstream
MYC2_763.AT1G11545	chr1	3880727	3881602	876	*	54	3.26092	5.43708	3.83145	MYC2_763	AT1G11545	3878550	3880361	-	upstream	-366	366	Upstream
MYC2_763.AT1G11550	chr1	3880727	3881602	876	*	54	3.26092	5.43708	3.83145	MYC2_763	AT1G11550	3881529	3881608	+	overlapStart	-802	6	Upstream
MYC2_763.AT1G11560	chr1	3880727	3881602	876	*	54	3.26092	5.43708	3.83145	MYC2_763	AT1G11560	3881788	3882819	+	upstream	-1061	186	Upstream
MYC2_764.AT1G11572	chr1	3884164	3884378	215	*	31	2.44569	3.12521	1.71436	MYC2_764	AT1G11572	3884356	3884952	+	overlapStart	-192	22	Upstream
MYC2_767.AT1G11580	chr1	3887693	3888303	611	*	238	7.74469	23.8811	21.6779	MYC2_767	AT1G11580	3888690	3890811	+	upstream	-997	387	Upstream
MYC2_768.AT1G11580	chr1	3888425	3888784	360	*	190	6.72566	19.0532	16.9457	MYC2_768	AT1G11580	3888690	3890811	+	overlapStart	-265	94	Upstream
MYC2_769.AT1G11590	chr1	3891640	3891907	268	*	26	2.24189	2.62363	1.2736	MYC2_769	AT1G11590	3892580	3894677	+	upstream	-940	673	Upstream
MYC2_770.AT1G11630	chr1	3914545	3914777	233	*	47	2.9144	4.70436	3.17472	MYC2_770	AT1G11630	3912902	3914407	-	upstream	-138	138	Upstream
MYC2_770.AT1G11640	chr1	3914545	3914777	233	*	47	2.9144	4.70436	3.17472	MYC2_770	AT1G11640	3914629	3914700	-	includeFeature	155	77	Upstream
MYC2_770.AT1G11650	chr1	3914545	3914777	233	*	47	2.9144	4.70436	3.17472	MYC2_770	AT1G11650	3914774	3918176	+	overlapStart	-229	3	Upstream
MYC2_771.AT1G11655	chr1	3918240	3918524	285	*	64	3.52544	6.44422	4.79043	MYC2_771	AT1G11655	3919272	3919774	+	upstream	-1032	748	Upstream
MYC2_778.AT1G11700	chr1	3945003	3945731	729	*	60	3.46473	6.08252	4.43613	MYC2_778	AT1G11700	3945737	3946613	+	upstream	-734	6	Upstream
MYC2_780.AT1G11710	chr1	3947785	3948227	443	*	124	5.1163	12.4255	10.5066	MYC2_780	AT1G11710	3948714	3951359	+	upstream	-929	487	Upstream
MYC2_781.AT1G11720	chr1	3950938	3951721	784	*	203	6.51231	20.3106	18.1808	MYC2_781	AT1G11720	3951553	3957044	+	overlapStart	-615	168	Upstream
MYC2_784.AT1G11735	chr1	3961658	3961882	225	*	60	3.46473	6.08252	4.43613	MYC2_784	AT1G11735	3961348	3961464	-	upstream	-194	194	Upstream
MYC2_785.AT1G11735	chr1	3962218	3962693	476	*	88	4.27996	8.89315	7.10093	MYC2_785	AT1G11735	3961348	3961464	-	upstream	-754	754	Upstream
MYC2_787.AT1G11755	chr1	3971773	3972037	265	*	64	3.40416	6.40453	4.75174	MYC2_787	AT1G11755	3969681	3971840	-	overlapStart	67	67	Upstream
MYC2_788.AT1G11785	chr1	3980994	3981353	360	*	171	6.10871	17.1309	15.081	MYC2_788	AT1G11785	3979862	3980956	-	upstream	-38	38	Upstream
MYC2_788.AT1G11790	chr1	3980994	3981353	360	*	171	6.10871	17.1309	15.081	MYC2_788	AT1G11790	3981248	3985215	+	overlapStart	-254	105	Upstream
MYC2_789.AT1G11820	chr1	3993471	3994170	700	*	154	5.91042	15.4207	13.4024	MYC2_789	AT1G11820	3991027	3993598	-	overlapStart	127	127	Upstream
MYC2_789.AT1G11840	chr1	3993471	3994170	700	*	154	5.91042	15.4207	13.4024	MYC2_789	AT1G11840	3995169	3997907	+	upstream	-1698	999	Upstream
MYC2_790.AT1G11840	chr1	3994619	3995483	865	*	1056	19.9854	105.602	102.496	MYC2_790	AT1G11840	3995169	3997907	+	overlapStart	-550	314	Upstream
MYC2_791.AT1G11850	chr1	3998083	3998343	261	*	36	2.6495	3.65933	2.19401	MYC2_791	AT1G11850	3999199	3999876	+	upstream	-1116	856	Upstream
MYC2_792.AT1G11850	chr1	3998577	3998877	301	*	67	3.66854	6.75201	5.06605	MYC2_792	AT1G11850	3999199	3999876	+	upstream	-622	322	Upstream
MYC2_793.AT1G11870	chr1	4003343	4003579	237	*	53	2.94922	5.33343	3.75794	MYC2_793	AT1G11870	4003846	4006739	+	upstream	-503	267	Upstream
MYC2_795.AT1G11880	chr1	4010575	4010767	193	*	41	2.74537	4.17101	2.68853	MYC2_795	AT1G11880	4007705	4010433	-	upstream	-142	142	Upstream
MYC2_795.AT1G11890	chr1	4010575	4010767	193	*	41	2.74537	4.17101	2.68853	MYC2_795	AT1G11890	4010779	4013125	+	upstream	-204	12	Upstream
MYC2_797.AT1G11910	chr1	4021048	4021300	253	*	46	2.97433	4.6478	3.12046	MYC2_797	AT1G11910	4016784	4020983	-	upstream	-65	65	Upstream
MYC2_797.AT1G11915	chr1	4021048	4021300	253	*	46	2.97433	4.6478	3.12046	MYC2_797	AT1G11915	4021825	4023292	+	upstream	-777	525	Upstream
MYC2_798.AT1G11920	chr1	4025583	4025847	265	*	31	2.44569	3.12521	1.71436	MYC2_798	AT1G11920	4023667	4025097	-	upstream	-486	486	Upstream
MYC2_799.AT1G11925	chr1	4027711	4028107	397	*	54	3.26092	5.43708	3.83145	MYC2_799	AT1G11925	4025930	4026732	-	upstream	-979	979	Upstream
MYC2_799.AT1G11930	chr1	4027711	4028107	397	*	54	3.26092	5.43708	3.83145	MYC2_799	AT1G11930	4028692	4030584	+	upstream	-981	585	Upstream
MYC2_800.AT1G11930	chr1	4028377	4028743	367	*	88	4.27996	8.89315	7.10093	MYC2_800	AT1G11930	4028692	4030584	+	overlapStart	-315	51	Upstream
MYC2_801.AT1G11940	chr1	4034007	4034276	270	*	25	2.17793	2.50609	1.20271	MYC2_801	AT1G11940	4031574	4034078	-	overlapStart	71	71	Upstream
MYC2_802.AT1G11950	chr1	4038658	4039133	476	*	30	2.43136	3.09805	1.71436	MYC2_802	AT1G11950	4034587	4038758	-	overlapStart	100	100	Upstream
MYC2_803.AT1G11960	chr1	4043979	4044622	644	*	228	6.94192	22.8144	20.6408	MYC2_803	AT1G11960	4039711	4043880	-	upstream	-99	99	Upstream
MYC2_803.AT1G11970	chr1	4043979	4044622	644	*	228	6.94192	22.8144	20.6408	MYC2_803	AT1G11970	4044370	4044669	+	overlapStart	-391	47	Upstream
MYC2_803.AT1G11980	chr1	4043979	4044622	644	*	228	6.94192	22.8144	20.6408	MYC2_803	AT1G11980	4045619	4045855	+	upstream	-1640	997	Upstream
MYC2_804.AT1G12013	chr1	4058286	4058560	275	*	36	2.6495	3.65933	2.19401	MYC2_804	AT1G12013	4058287	4058416	+	includeFeature	-1	1	Upstream
MYC2_804.AT1G12015	chr1	4058286	4058560	275	*	36	2.6495	3.65933	2.19401	MYC2_804	AT1G12015	4058487	4058576	+	overlapStart	-201	16	Upstream
MYC2_809.AT1G12030	chr1	4066352	4066563	212	*	66	3.63231	6.67457	5.01536	MYC2_809	AT1G12030	4064667	4066341	-	upstream	-11	11	Upstream
MYC2_810.AT1G12070	chr1	4080425	4080624	200	*	47	3.03292	4.76774	3.23599	MYC2_810	AT1G12070	4078913	4080106	-	upstream	-319	319	Upstream
MYC2_815.AT1G12090	chr1	4090602	4090852	251	*	26	2.24189	2.62363	1.2736	MYC2_815	AT1G12090	4089847	4090725	-	overlapStart	123	123	Upstream
MYC2_823.AT1G12110	chr1	4104057	4104486	430	*	36	2.6495	3.65933	2.19401	MYC2_823	AT1G12110	4105233	4109545	+	upstream	-1176	747	Upstream
MYC2_824.AT1G12110	chr1	4104870	4105652	783	*	67	3.66854	6.75201	5.06605	MYC2_824	AT1G12110	4105233	4109545	+	overlapStart	-363	363	Upstream
MYC2_828.AT1G12120	chr1	4117138	4118134	997	*	199	6.92946	19.9944	17.8664	MYC2_828	AT1G12120	4114771	4117594	-	overlapStart	456	456	Upstream
MYC2_828.AT1G12130	chr1	4117138	4118134	997	*	199	6.92946	19.9944	17.8664	MYC2_828	AT1G12130	4118594	4120871	+	upstream	-1456	460	Upstream
MYC2_829.AT1G12140	chr1	4121120	4121373	254	*	54	3.26092	5.43708	3.83145	MYC2_829	AT1G12140	4121369	4124595	+	overlapStart	-249	4	Upstream
MYC2_830.AT1G12150	chr1	4125789	4126013	225	*	31	2.44569	3.12521	1.71436	MYC2_830	AT1G12150	4123530	4125648	-	upstream	-141	141	Upstream
MYC2_830.AT1G12160	chr1	4125789	4126013	225	*	31	2.44569	3.12521	1.71436	MYC2_830	AT1G12160	4126066	4128310	+	upstream	-277	53	Upstream
MYC2_833.AT1G12210	chr1	4139957	4140399	443	*	60	3.46473	6.08252	4.43613	MYC2_833	AT1G12210	4140948	4143605	+	upstream	-991	549	Upstream
MYC2_834.AT1G12240	chr1	4151162	4152910	1749	*	1553	27.9217	155.308	151.384	MYC2_834	AT1G12240	4153652	4157644	+	upstream	-2490	742	Upstream
MYC2_835.AT1G12240	chr1	4153389	4153739	351	*	26	2.24189	2.62363	1.2736	MYC2_835	AT1G12240	4153652	4157644	+	overlapStart	-263	87	Upstream
MYC2_837.AT1G12250	chr1	4159099	4159283	185	*	49	2.77349	4.90215	3.33807	MYC2_837	AT1G12250	4159265	4161455	+	overlapStart	-166	18	Upstream
MYC2_839.AT1G12310	chr1	4188177	4189004	828	*	1868	31.9978	186.843	182.537	MYC2_839	AT1G12310	4187165	4188056	-	upstream	-121	121	Upstream
MYC2_839.AT1G12320	chr1	4188177	4189004	828	*	1868	31.9978	186.843	182.537	MYC2_839	AT1G12320	4189355	4190342	+	upstream	-1178	351	Upstream
MYC2_840.AT1G12320	chr1	4189164	4189481	318	*	74	3.87235	7.44433	5.72108	MYC2_840	AT1G12320	4189355	4190342	+	overlapStart	-191	126	Upstream
MYC2_846.AT1G12380	chr1	4217176	4217818	643	*	136	5.50281	13.6902	11.7224	MYC2_846	AT1G12380	4214262	4217132	-	upstream	-44	44	Upstream
MYC2_847.AT1G12390	chr1	4219682	4219948	267	*	36	2.6495	3.65933	2.19401	MYC2_847	AT1G12390	4220100	4221774	+	upstream	-418	152	Upstream
MYC2_848.AT1G12410	chr1	4222792	4223106	315	*	32	2.40065	3.2979	1.88113	MYC2_848	AT1G12410	4223030	4225124	+	overlapStart	-238	76	Upstream
MYC2_849.AT1G12411	chr1	4225742	4226447	706	*	248	7.9485	24.8816	22.6611	MYC2_849	AT1G12411	4225321	4225482	-	upstream	-260	260	Upstream
MYC2_850.AT1G12420	chr1	4229612	4231577	1966	*	281	8.21829	28.1607	25.8895	MYC2_850	AT1G12420	4226362	4229138	-	upstream	-474	474	Upstream
MYC2_850.AT1G12423	chr1	4229612	4231577	1966	*	281	8.21829	28.1607	25.8895	MYC2_850	AT1G12423	4231027	4231146	-	includeFeature	1534	431	Upstream
MYC2_851.AT1G12430	chr1	4238765	4239391	627	*	123	5.07241	12.3228	10.4054	MYC2_851	AT1G12430	4233873	4238764	-	upstream	-1	1	Upstream
MYC2_852.AT1G12440	chr1	4242911	4243833	923	*	155	5.34823	15.5669	13.5472	MYC2_852	AT1G12440	4241592	4243008	-	overlapStart	97	97	Upstream
MYC2_852.AT1G12450	chr1	4242911	4243833	923	*	155	5.34823	15.5669	13.5472	MYC2_852	AT1G12450	4244308	4245993	+	upstream	-1397	475	Upstream
MYC2_853.AT1G12451	chr1	4246799	4247393	595	*	125	5.01287	12.5322	10.6123	MYC2_853	AT1G12451	4246109	4246291	-	upstream	-508	508	Upstream
MYC2_853.AT1G12460	chr1	4246799	4247393	595	*	125	5.01287	12.5322	10.6123	MYC2_853	AT1G12460	4247249	4250630	+	overlapStart	-450	144	Upstream
MYC2_856.AT1G12500	chr1	4265166	4265422	257	*	88	4.27996	8.89315	7.10093	MYC2_856	AT1G12500	4263150	4265044	-	upstream	-122	122	Upstream
MYC2_857.AT1G12500	chr1	4265961	4266322	362	*	42	2.85331	4.2239	2.70893	MYC2_857	AT1G12500	4263150	4265044	-	upstream	-917	917	Upstream
MYC2_858.AT1G12510	chr1	4266678	4267138	461	*	209	7.13327	20.9482	18.8004	MYC2_858	AT1G12510	4266988	4267061	-	includeFeature	383	77	Upstream
MYC2_859.AT1G12540	chr1	4271935	4272900	966	*	653	15.0818	65.3999	62.7619	MYC2_859	AT1G12540	4272960	4274206	+	upstream	-1025	60	Upstream
MYC2_860.AT1G12550	chr1	4274311	4274525	215	*	60	3.46473	6.08252	4.43613	MYC2_860	AT1G12550	4274594	4275981	+	upstream	-283	69	Upstream
MYC2_861.AT1G12580	chr1	4282162	4282532	371	*	67	3.54881	6.73215	5.06605	MYC2_861	AT1G12580	4282899	4285829	+	upstream	-737	367	Upstream
MYC2_863.AT1G12610	chr1	4290886	4291522	637	*	128	5.299	12.8481	10.9066	MYC2_863	AT1G12610	4289944	4291017	-	overlapStart	131	131	Upstream
MYC2_864.AT1G12610	chr1	4291848	4292914	1067	*	1537	27.7179	153.763	149.855	MYC2_864	AT1G12610	4289944	4291017	-	upstream	-831	831	Upstream
MYC2_865.AT1G12660	chr1	4308151	4308369	219	*	31	2.44569	3.12521	1.71436	MYC2_865	AT1G12660	4308943	4309583	+	upstream	-792	574	Upstream
MYC2_866.AT1G12670	chr1	4316232	4316741	510	*	81	4.07615	8.15838	6.39981	MYC2_866	AT1G12670	4316701	4317005	+	overlapStart	-469	40	Upstream
MYC2_867.AT1G12672	chr1	4317923	4318107	185	*	31	2.44569	3.12521	1.71436	MYC2_867	AT1G12672	4318309	4319090	+	upstream	-386	202	Upstream
MYC2_868.AT1G12700	chr1	4326268	4326601	334	*	66	3.60499	6.61596	4.9579	MYC2_868	AT1G12700	4323556	4326333	-	overlapStart	65	65	Upstream
MYC2_869.AT1G12710	chr1	4328444	4328731	288	*	119	5.04232	11.9014	10.0072	MYC2_869	AT1G12710	4326739	4328481	-	overlapStart	37	37	Upstream
MYC2_874.AT1G12750	chr1	4348166	4348605	440	*	410	10.9801	41.0075	38.5832	MYC2_874	AT1G12750	4344985	4348328	-	overlapStart	162	162	Upstream
MYC2_874.AT1G12760	chr1	4348166	4348605	440	*	410	10.9801	41.0075	38.5832	MYC2_874	AT1G12760	4348498	4350867	+	overlapStart	-332	107	Upstream
MYC2_875.AT1G12780	chr1	4358228	4358412	185	*	42	2.77976	4.24346	2.72824	MYC2_875	AT1G12780	4355926	4358328	-	overlapStart	100	84	Upstream
MYC2_876.AT1G12810	chr1	4367060	4367367	308	*	265	7.99094	26.533	24.2918	MYC2_876	AT1G12810	4367256	4368822	+	overlapStart	-196	111	Upstream
MYC2_878.AT1G12820	chr1	4371241	4371837	597	*	106	4.0715	10.686	8.82711	MYC2_878	AT1G12820	4368760	4371293	-	overlapStart	52	52	Upstream
MYC2_880.AT1G12845	chr1	4379340	4379705	366	*	216	6.68752	21.6722	19.5193	MYC2_880	AT1G12845	4378939	4379516	-	overlapStart	176	176	Upstream
MYC2_881.AT1G12860	chr1	4383822	4384070	249	*	35	2.61672	3.5954	2.16682	MYC2_881	AT1G12860	4384353	4386610	+	upstream	-531	283	Upstream
MYC2_882.AT1G12890	chr1	4391059	4391402	344	*	31	2.44569	3.12521	1.71436	MYC2_882	AT1G12890	4391734	4392393	+	upstream	-675	332	Upstream
MYC2_883.AT1G12950	chr1	4419245	4419662	418	*	60	3.46473	6.08252	4.43613	MYC2_883	AT1G12950	4419770	4422638	+	upstream	-525	108	Upstream
MYC2_884.AT1G12980	chr1	4428903	4429500	598	*	163	6.11423	16.3081	14.2657	MYC2_884	AT1G12980	4429718	4430965	+	upstream	-815	218	Upstream
MYC2_885.AT1G12990	chr1	4432397	4433733	1337	*	209	7.13327	20.9482	18.8004	MYC2_885	AT1G12990	4433640	4436075	+	overlapStart	-1243	93	Upstream
MYC2_887.AT1G13000	chr1	4439517	4439739	223	*	47	2.9144	4.70436	3.17472	MYC2_887	AT1G13000	4436105	4439476	-	upstream	-41	41	Upstream
MYC2_887.AT1G13010	chr1	4439517	4439739	223	*	47	2.9144	4.70436	3.17472	MYC2_887	AT1G13010	4440214	4440286	+	upstream	-697	475	Upstream
MYC2_888.AT1G13000	chr1	4440427	4440808	382	*	19	1.89538	1.90448	0.683513	MYC2_888	AT1G13000	4436105	4439476	-	upstream	-951	951	Upstream
MYC2_889.AT1G13080	chr1	4458130	4458487	358	*	96	4.48377	9.64772	7.82338	MYC2_889	AT1G13080	4459166	4460940	+	upstream	-1036	679	Upstream
MYC2_890.AT1G13080	chr1	4458748	4459155	408	*	172	6.31804	17.2096	15.1446	MYC2_890	AT1G13080	4459166	4460940	+	upstream	-418	11	Upstream
MYC2_891.AT1G13110	chr1	4466466	4467355	890	*	163	6.11423	16.3081	14.2657	MYC2_891	AT1G13110	4467220	4469033	+	overlapStart	-754	135	Upstream
MYC2_893.AT1G13170	chr1	4492748	4493111	364	*	31	2.44569	3.12521	1.71436	MYC2_893	AT1G13170	4488533	4492587	-	upstream	-161	161	Upstream
MYC2_894.AT1G13180	chr1	4494358	4494681	324	*	31	2.44569	3.12521	1.71436	MYC2_894	AT1G13180	4495028	4498469	+	upstream	-670	347	Upstream
MYC2_895.AT1G13190	chr1	4498626	4499109	484	*	553	13.4513	55.3478	52.7921	MYC2_895	AT1G13190	4498881	4501613	+	overlapStart	-255	228	Upstream
MYC2_896.AT1G13195	chr1	4503441	4504074	634	*	343	9.78277	34.3482	31.9919	MYC2_896	AT1G13195	4501581	4503591	-	overlapStart	150	150	Upstream
MYC2_897.AT1G13210	chr1	4514018	4515433	1416	*	532	12.8952	53.2244	50.687	MYC2_897	AT1G13210	4508963	4513938	-	upstream	-80	80	Upstream
MYC2_897.AT1G13220	chr1	4514018	4515433	1416	*	532	12.8952	53.2244	50.687	MYC2_897	AT1G13220	4515606	4520284	+	upstream	-1588	173	Upstream
MYC2_898.AT1G13240	chr1	4522814	4523510	697	*	74	3.87235	7.44433	5.72108	MYC2_898	AT1G13240	4522709	4522782	-	upstream	-32	32	Upstream
MYC2_900.AT1G13245	chr1	4525249	4527005	1757	*	363	10.1097	36.3554	33.9812	MYC2_900	AT1G13245	4525486	4526064	-	includeFeature	815	237	Upstream
MYC2_903.AT1G13250	chr1	4530015	4531012	998	*	399	10.8018	39.9297	37.5101	MYC2_903	AT1G13250	4528623	4530063	-	overlapStart	48	48	Upstream
MYC2_912.AT1G13260	chr1	4540595	4541180	586	*	145	5.70662	14.5479	12.5546	MYC2_912	AT1G13260	4542168	4543742	+	upstream	-1573	988	Upstream
MYC2_913.AT1G13260	chr1	4541625	4542742	1118	*	505	12.3972	50.5577	48.0408	MYC2_913	AT1G13260	4542168	4543742	+	overlapStart	-543	543	Upstream
MYC2_915.AT1G13270	chr1	4543381	4544371	991	*	112	4.89139	11.2129	9.32726	MYC2_915	AT1G13270	4544953	4547312	+	upstream	-1572	582	Upstream
MYC2_916.AT1G13280	chr1	4547200	4547707	508	*	626	14.603	62.6698	60.0592	MYC2_916	AT1G13280	4547454	4548875	+	overlapStart	-254	253	Upstream
MYC2_922.AT1G13340	chr1	4571684	4572021	338	*	51	3.1154	5.13309	3.56334	MYC2_922	AT1G13340	4569448	4571118	-	upstream	-566	566	Upstream
MYC2_923.AT1G13350	chr1	4576727	4576973	247	*	30	2.38538	3.01064	1.64214	MYC2_923	AT1G13350	4572419	4576632	-	upstream	-95	95	Upstream
MYC2_924.AT1G13350	chr1	4577215	4578428	1214	*	365	10.1904	36.5553	34.1722	MYC2_924	AT1G13350	4572419	4576632	-	upstream	-583	583	Upstream
MYC2_924.AT1G13360	chr1	4577215	4578428	1214	*	365	10.1904	36.5553	34.1722	MYC2_924	AT1G13360	4576873	4577967	-	overlapStart	752	342	Upstream
MYC2_925.AT1G13360	chr1	4578591	4578937	347	*	54	3.26092	5.43708	3.83145	MYC2_925	AT1G13360	4576873	4577967	-	upstream	-624	624	Upstream
MYC2_932.AT1G13380	chr1	4590376	4591284	909	*	87	3.58524	8.75507	6.98766	MYC2_932	AT1G13380	4589071	4590423	-	overlapStart	47	47	Upstream
MYC2_937.AT1G13420	chr1	4604471	4604856	386	*	74	3.87235	7.44433	5.72108	MYC2_937	AT1G13420	4604841	4606053	+	overlapStart	-370	15	Upstream
MYC2_939.AT1G13440	chr1	4610506	4611074	569	*	32	2.37362	3.24112	1.82582	MYC2_939	AT1G13440	4608196	4610647	-	overlapStart	141	141	Upstream
MYC2_940.AT1G13440	chr1	4611345	4612115	771	*	48	3.05712	4.81704	3.25478	MYC2_940	AT1G13440	4608196	4610647	-	upstream	-698	698	Upstream
MYC2_940.AT1G13448	chr1	4611345	4612115	771	*	48	3.05712	4.81704	3.25478	MYC2_940	AT1G13448	4612243	4612929	+	upstream	-898	128	Upstream
MYC2_941.AT1G13450	chr1	4615608	4615818	211	*	17	1.83427	1.72792	0.517312	MYC2_941	AT1G13450	4612731	4615353	-	upstream	-255	255	Upstream
MYC2_941.AT1G13460	chr1	4615608	4615818	211	*	17	1.83427	1.72792	0.517312	MYC2_941	AT1G13460	4615813	4618329	+	overlapStart	-205	5	Upstream
MYC2_942.AT1G13470	chr1	4622449	4622707	259	*	31	2.44569	3.12521	1.71436	MYC2_942	AT1G13470	4620228	4621580	-	upstream	-869	869	Upstream
MYC2_943.AT1G13560	chr1	4641966	4642150	185	*	28	2.29405	2.83586	1.4767	MYC2_943	AT1G13560	4638514	4642104	-	overlapStart	138	46	Upstream
MYC2_945.AT1G13580	chr1	4647073	4647301	229	*	26	2.24189	2.62363	1.2736	MYC2_945	AT1G13580	4644521	4647007	-	upstream	-66	66	Upstream
MYC2_945.AT1G13590	chr1	4647073	4647301	229	*	26	2.24189	2.62363	1.2736	MYC2_945	AT1G13590	4647949	4648740	+	upstream	-876	648	Upstream
MYC2_948.AT1G13640	chr1	4680198	4680423	226	*	62	3.44969	6.27914	4.62833	MYC2_948	AT1G13640	4677027	4679812	-	upstream	-386	386	Upstream
MYC2_950.AT1G13700	chr1	4695738	4696606	869	*	31	2.44569	3.12521	1.71436	MYC2_950	AT1G13700	4694372	4696023	-	overlapStart	285	285	Upstream
MYC2_952.AT1G13720	chr1	4709523	4709730	208	*	60	3.46473	6.08252	4.43613	MYC2_952	AT1G13720	4709635	4709706	+	includeFeature	-112	24	Upstream
MYC2_952.AT1G13730	chr1	4709523	4709730	208	*	60	3.46473	6.08252	4.43613	MYC2_952	AT1G13730	4709824	4712550	+	upstream	-301	94	Upstream
MYC2_953.AT1G13740	chr1	4712692	4713789	1098	*	445	11.617	44.5417	42.0769	MYC2_953	AT1G13740	4713674	4715407	+	overlapStart	-982	115	Upstream
MYC2_954.AT1G13830	chr1	4741659	4741843	185	*	25	2.17577	2.50211	1.19882	MYC2_954	AT1G13830	4739873	4741038	-	upstream	-621	621	Upstream
MYC2_954.AT1G13840	chr1	4741659	4741843	185	*	25	2.17577	2.50211	1.19882	MYC2_954	AT1G13840	4741999	4742071	+	upstream	-340	156	Upstream
MYC2_955.AT1G13860	chr1	4747006	4747417	412	*	53	3.11713	5.33584	3.76034	MYC2_955	AT1G13860	4743205	4746956	-	upstream	-50	50	Upstream
MYC2_956.AT1G13870	chr1	4748792	4749074	283	*	60	3.35909	6.07966	4.43613	MYC2_956	AT1G13870	4747265	4748642	-	upstream	-150	150	Upstream
MYC2_956.AT1G13880	chr1	4748792	4749074	283	*	60	3.35909	6.07966	4.43613	MYC2_956	AT1G13880	4748873	4751212	+	overlapStart	-81	81	Upstream
MYC2_957.AT1G13930	chr1	4759982	4761103	1122	*	491	10.4888	49.1105	46.6101	MYC2_957	AT1G13930	4761012	4762666	+	overlapStart	-1030	91	Upstream
MYC2_959.AT1G13940	chr1	4766704	4767005	302	*	54	3.26092	5.43708	3.83145	MYC2_959	AT1G13940	4762703	4766749	-	overlapStart	45	45	Upstream
MYC2_963.AT1G13950	chr1	4772633	4773230	598	*	181	6.19311	18.1845	16.0972	MYC2_963	AT1G13950	4773576	4774867	+	upstream	-943	346	Upstream
MYC2_965.AT1G13980	chr1	4787222	4787549	328	*	112	4.89139	11.2129	9.32726	MYC2_965	AT1G13980	4788463	4794654	+	upstream	-1241	914	Upstream
MYC2_966.AT1G13980	chr1	4787823	4788325	503	*	67	3.66854	6.75201	5.06605	MYC2_966	AT1G13980	4788463	4794654	+	upstream	-640	138	Upstream
MYC2_967.AT1G13990	chr1	4794533	4794806	274	*	129	4.90955	12.9672	11.0245	MYC2_967	AT1G13990	4794756	4796597	+	overlapStart	-223	50	Upstream
MYC2_968.AT1G14000	chr1	4796463	4797552	1090	*	485	11.6318	48.5462	46.0478	MYC2_968	AT1G14000	4797358	4800283	+	overlapStart	-895	194	Upstream
MYC2_969.AT1G14010	chr1	4801764	4802532	769	*	104	4.44363	10.4851	8.62825	MYC2_969	AT1G14010	4800169	4801850	-	overlapStart	86	86	Upstream
MYC2_969.AT1G14020	chr1	4801764	4802532	769	*	104	4.44363	10.4851	8.62825	MYC2_969	AT1G14020	4802720	4805375	+	upstream	-956	188	Upstream
MYC2_970.AT1G14040	chr1	4809776	4809981	206	*	26	2.24189	2.62363	1.2736	MYC2_970	AT1G14040	4810488	4814543	+	upstream	-712	507	Upstream
MYC2_973.AT1G14120	chr1	4834730	4835344	615	*	285	8.56468	28.5012	26.2286	MYC2_973	AT1G14120	4833518	4835089	-	overlapStart	359	255	Upstream
MYC2_974.AT1G14130	chr1	4837399	4838023	625	*	634	14.6276	63.4837	60.864	MYC2_974	AT1G14130	4835724	4837616	-	overlapStart	217	217	Upstream
MYC2_975.AT1G14170	chr1	4846241	4846502	262	*	26	2.24189	2.62363	1.2736	MYC2_975	AT1G14170	4843234	4845847	-	upstream	-394	394	Upstream
MYC2_975.AT1G14180	chr1	4846241	4846502	262	*	26	2.24189	2.62363	1.2736	MYC2_975	AT1G14180	4847162	4849207	+	upstream	-921	660	Upstream
MYC2_976.AT1G14182	chr1	4849944	4850268	325	*	145	5.70662	14.5479	12.5546	MYC2_976	AT1G14182	4849448	4849826	-	upstream	-118	118	Upstream
MYC2_976.AT1G14185	chr1	4849944	4850268	325	*	145	5.70662	14.5479	12.5546	MYC2_976	AT1G14185	4850274	4852096	+	upstream	-330	6	Upstream
MYC2_977.AT1G14240	chr1	4864188	4864435	248	*	36	2.6495	3.65933	2.19401	MYC2_977	AT1G14240	4864902	4868000	+	upstream	-714	467	Upstream
MYC2_978.AT1G14250	chr1	4868065	4868441	377	*	289	8.76373	28.9902	26.7052	MYC2_978	AT1G14250	4868452	4871488	+	upstream	-387	11	Upstream
MYC2_979.AT1G14270	chr1	4877268	4877661	394	*	180	6.47051	18.0033	15.9314	MYC2_979	AT1G14270	4874875	4877248	-	upstream	-20	20	Upstream
MYC2_979.AT1G14280	chr1	4877268	4877661	394	*	180	6.47051	18.0033	15.9314	MYC2_979	AT1G14280	4877627	4879149	+	overlapStart	-359	34	Upstream
MYC2_981.AT1G14290	chr1	4881896	4882441	546	*	457	11.34	45.7986	43.3228	MYC2_981	AT1G14290	4880051	4881964	-	overlapStart	68	68	Upstream
MYC2_983.AT1G14330	chr1	4891961	4892552	592	*	36	2.6495	3.65933	2.19401	MYC2_983	AT1G14330	4890118	4892251	-	overlapStart	290	290	Upstream
MYC2_984.AT1G14330	chr1	4893052	4893937	886	*	145	5.70662	14.5479	12.5546	MYC2_984	AT1G14330	4890118	4892251	-	upstream	-801	801	Upstream
MYC2_986.AT1G14340	chr1	4896294	4896750	457	*	60	3.46473	6.08252	4.43613	MYC2_986	AT1G14340	4897346	4898961	+	upstream	-1052	596	Upstream
MYC2_989.AT1G14350	chr1	4906355	4907060	706	*	60	3.46473	6.08252	4.43613	MYC2_989	AT1G14350	4907953	4911168	+	upstream	-1598	893	Upstream
MYC2_990.AT1G14360	chr1	4913151	4913449	299	*	23	2.01788	2.38861	1.09169	MYC2_990	AT1G14360	4911093	4913152	-	overlapStart	1	1	Upstream
MYC2_991.AT1G14360	chr1	4913805	4914162	358	*	336	9.49899	33.6426	31.2979	MYC2_991	AT1G14360	4911093	4913152	-	upstream	-653	653	Upstream
MYC2_992.AT1G14370	chr1	4914458	4914921	464	*	30	2.39972	3.03793	1.66811	MYC2_992	AT1G14370	4915576	4918138	+	upstream	-1118	655	Upstream
MYC2_993.AT1G14370	chr1	4915415	4915633	219	*	46	2.81727	4.66525	3.13708	MYC2_993	AT1G14370	4915576	4918138	+	overlapStart	-161	57	Upstream
MYC2_995.AT1G14390	chr1	4923244	4923533	290	*	81	4.07615	8.15838	6.39981	MYC2_995	AT1G14390	4924277	4926794	+	upstream	-1033	744	Upstream
MYC2_996.AT1G14420	chr1	4933879	4934142	264	*	31	2.44569	3.12521	1.71436	MYC2_996	AT1G14420	4931566	4933515	-	upstream	-364	364	Upstream
MYC2_996.AT1G14430	chr1	4933879	4934142	264	*	31	2.44569	3.12521	1.71436	MYC2_996	AT1G14430	4934120	4936100	+	overlapStart	-241	22	Upstream
MYC2_998.AT1G14440	chr1	4941233	4941531	299	*	54	3.26092	5.43708	3.83145	MYC2_998	AT1G14440	4938824	4940903	-	upstream	-330	330	Upstream
MYC2_1001.AT1G14460	chr1	4952781	4953232	452	*	92	4.06907	9.26542	7.46849	MYC2_1001	AT1G14460	4948748	4952927	-	overlapStart	146	146	Upstream
MYC2_1001.AT1G14470	chr1	4952781	4953232	452	*	92	4.06907	9.26542	7.46849	MYC2_1001	AT1G14470	4954080	4955702	+	upstream	-1299	848	Upstream
MYC2_1002.AT1G14460	chr1	4953347	4953948	602	*	33	2.5032	3.37222	1.95217	MYC2_1002	AT1G14460	4948748	4952927	-	upstream	-420	420	Upstream
MYC2_1002.AT1G14470	chr1	4953347	4953948	602	*	33	2.5032	3.37222	1.95217	MYC2_1002	AT1G14470	4954080	4955702	+	upstream	-733	132	Upstream
MYC2_1003.AT1G14520	chr1	4970158	4970863	706	*	177	6.35786	17.7348	15.6653	MYC2_1003	AT1G14520	4968142	4970311	-	overlapStart	153	153	Upstream
MYC2_1004.AT1G14540	chr1	4976142	4976388	247	*	128	5.299	12.8481	10.9066	MYC2_1004	AT1G14540	4974067	4975705	-	upstream	-437	437	Upstream
MYC2_1006.AT1G14580	chr1	4988831	4989158	328	*	128	5.299	12.8481	10.9066	MYC2_1006	AT1G14580	4989562	4992732	+	upstream	-731	404	Upstream
MYC2_1007.AT1G14580	chr1	4989377	4989982	606	*	54	3.26092	5.43708	3.83145	MYC2_1007	AT1G14580	4989562	4992732	+	overlapStart	-185	185	Upstream
MYC2_1016.AT1G14600	chr1	5003315	5004092	778	*	354	9.98658	35.4474	33.0777	MYC2_1016	AT1G14600	5001011	5003370	-	overlapStart	55	55	Upstream
MYC2_1021.AT1G14640	chr1	5022289	5022693	405	*	300	8.96754	30.0428	27.7424	MYC2_1021	AT1G14640	5023656	5025955	+	upstream	-1367	963	Upstream
MYC2_1022.AT1G14685	chr1	5042313	5042596	284	*	36	2.6495	3.65933	2.19401	MYC2_1022	AT1G14685	5042323	5044294	+	overlapStart	-10	10	Upstream
MYC2_1024.AT1G14686	chr1	5047461	5047650	190	*	21	2.03808	2.15698	0.872271	MYC2_1024	AT1G14686	5045781	5046800	-	upstream	-661	661	Upstream
MYC2_1024.AT1G14687	chr1	5047461	5047650	190	*	21	2.03808	2.15698	0.872271	MYC2_1024	AT1G14687	5047803	5048612	+	upstream	-342	153	Upstream
MYC2_1026.AT1G14690	chr1	5055123	5055716	594	*	145	5.70662	14.5479	12.5546	MYC2_1026	AT1G14690	5051760	5055252	-	overlapStart	129	129	Upstream
MYC2_1028.AT1G14700	chr1	5057988	5058288	301	*	54	3.26092	5.43708	3.83145	MYC2_1028	AT1G14700	5058680	5061136	+	upstream	-692	392	Upstream
MYC2_1031.AT1G14710	chr1	5065224	5065588	365	*	48	3.05712	4.81704	3.25478	MYC2_1031	AT1G14710	5061866	5065178	-	upstream	-46	46	Upstream
MYC2_1033.AT1G14720	chr1	5068376	5068658	283	*	60	3.46473	6.08252	4.43613	MYC2_1033	AT1G14720	5066636	5068645	-	overlapStart	269	13	Upstream
MYC2_1034.AT1G14720	chr1	5069030	5069688	659	*	67	3.66854	6.75201	5.06605	MYC2_1034	AT1G14720	5066636	5068645	-	upstream	-385	385	Upstream
MYC2_1036.AT1G14740	chr1	5077751	5078558	808	*	321	9.37516	32.1769	29.8476	MYC2_1036	AT1G14740	5075213	5077791	-	overlapStart	40	40	Upstream
MYC2_1037.AT1G14750	chr1	5082588	5082809	222	*	48	3.05712	4.81704	3.25478	MYC2_1037	AT1G14750	5079407	5082520	-	upstream	-68	68	Upstream
MYC2_1037.AT1G14755	chr1	5082588	5082809	222	*	48	3.05712	4.81704	3.25478	MYC2_1037	AT1G14755	5083742	5084342	+	upstream	-1154	933	Upstream
MYC2_1038.AT1G14750	chr1	5083122	5083405	284	*	26	2.24189	2.62363	1.2736	MYC2_1038	AT1G14750	5079407	5082520	-	upstream	-602	602	Upstream
MYC2_1038.AT1G14755	chr1	5083122	5083405	284	*	26	2.24189	2.62363	1.2736	MYC2_1038	AT1G14755	5083742	5084342	+	upstream	-620	337	Upstream
MYC2_1039.AT1G14770	chr1	5089049	5090335	1287	*	128	5.299	12.8481	10.9066	MYC2_1039	AT1G14770	5086626	5088846	-	upstream	-203	203	Upstream
MYC2_1039.AT1G14780	chr1	5089049	5090335	1287	*	128	5.299	12.8481	10.9066	MYC2_1039	AT1G14780	5090990	5094152	+	upstream	-1941	655	Upstream
MYC2_1040.AT1G14780	chr1	5090764	5091285	522	*	14	1.65722	1.48036	0.343034	MYC2_1040	AT1G14780	5090990	5094152	+	overlapStart	-226	226	Upstream
MYC2_1042.AT1G14810	chr1	5104592	5105020	429	*	276	8.02734	27.6637	25.4051	MYC2_1042	AT1G14810	5102424	5104695	-	overlapStart	103	103	Upstream
MYC2_1043.AT1G14840	chr1	5115511	5115963	453	*	159	5.80136	15.9651	13.9414	MYC2_1043	AT1G14840	5111955	5115497	-	upstream	-14	14	Upstream
MYC2_1050.AT1G14920	chr1	5146632	5148371	1740	*	445	11.617	44.5417	42.0769	MYC2_1050	AT1G14920	5149226	5151354	+	upstream	-2594	855	Upstream
MYC2_1051.AT1G14920	chr1	5148548	5148817	270	*	48	3.05712	4.81704	3.25478	MYC2_1051	AT1G14920	5149226	5151354	+	upstream	-678	409	Upstream
MYC2_1053.AT1G14970	chr1	5165051	5165589	539	*	86	4.03209	8.61627	6.85043	MYC2_1053	AT1G14970	5161949	5164917	-	upstream	-134	134	Upstream
MYC2_1054.AT1G14990	chr1	5168300	5168660	361	*	279	8.34821	27.9612	25.6914	MYC2_1054	AT1G14990	5167031	5168264	-	upstream	-36	36	Upstream
MYC2_1054.AT1G15000	chr1	5168300	5168660	361	*	279	8.34821	27.9612	25.6914	MYC2_1054	AT1G15000	5168596	5170066	+	overlapStart	-296	64	Upstream
MYC2_1055.AT1G15002	chr1	5170599	5171203	605	*	208	6.89536	20.8367	18.7023	MYC2_1055	AT1G15002	5169940	5170435	-	upstream	-164	164	Upstream
MYC2_1055.AT1G15010	chr1	5170599	5171203	605	*	208	6.89536	20.8367	18.7023	MYC2_1055	AT1G15010	5171207	5171742	+	upstream	-608	4	Upstream
MYC2_1055.AT1G15015	chr1	5170599	5171203	605	*	208	6.89536	20.8367	18.7023	MYC2_1055	AT1G15015	5172081	5172923	+	upstream	-1482	878	Upstream
MYC2_1056.AT1G15020	chr1	5177011	5177555	545	*	44	2.87583	4.44426	2.92265	MYC2_1056	AT1G15020	5173097	5176223	-	upstream	-788	788	Upstream
MYC2_1056.AT1G15030	chr1	5177011	5177555	545	*	44	2.87583	4.44426	2.92265	MYC2_1056	AT1G15030	5177529	5180049	+	overlapStart	-518	26	Upstream
MYC2_1057.AT1G15040	chr1	5181401	5181873	473	*	37	2.63478	3.78281	2.31367	MYC2_1057	AT1G15040	5179887	5181389	-	upstream	-12	12	Upstream
MYC2_1057.AT1G15045	chr1	5181401	5181873	473	*	37	2.63478	3.78281	2.31367	MYC2_1057	AT1G15045	5181857	5181964	+	overlapStart	-456	16	Upstream
MYC2_1058.AT1G15090	chr1	5189767	5190147	381	*	120	4.79912	12.0076	10.1079	MYC2_1058	AT1G15090	5189687	5189760	-	upstream	-7	7	Upstream
MYC2_1059.AT1G15090	chr1	5190523	5190712	190	*	31	2.44569	3.12521	1.71436	MYC2_1059	AT1G15090	5189687	5189760	-	upstream	-763	763	Upstream
MYC2_1061.AT1G15100	chr1	5194178	5194794	617	*	96	4.48377	9.64772	7.82338	MYC2_1061	AT1G15100	5193426	5194203	-	overlapStart	25	25	Upstream
MYC2_1065.AT1G15110	chr1	5198923	5199278	356	*	191	6.24773	19.1784	17.0698	MYC2_1065	AT1G15110	5199018	5202175	+	overlapStart	-95	95	Upstream
MYC2_1066.AT1G15120	chr1	5202384	5202724	341	*	98	4.41808	9.80746	7.98042	MYC2_1066	AT1G15120	5202648	5204193	+	overlapStart	-264	76	Upstream
MYC2_1067.AT1G15125	chr1	5204179	5204742	564	*	424	10.1148	42.4447	40.0012	MYC2_1067	AT1G15125	5204625	5205912	+	overlapStart	-446	117	Upstream
MYC2_1068.AT1G15150	chr1	5212074	5212305	232	*	31	2.28017	3.16169	1.7494	MYC2_1068	AT1G15150	5212615	5214858	+	upstream	-541	310	Upstream
MYC2_1069.AT1G15165	chr1	5220135	5220472	338	*	29	2.30538	2.97685	1.61036	MYC2_1069	AT1G15165	5217719	5220113	-	upstream	-22	22	Upstream
MYC2_1069.AT1G15170	chr1	5220135	5220472	338	*	29	2.30538	2.97685	1.61036	MYC2_1069	AT1G15170	5220641	5222973	+	upstream	-506	169	Upstream
MYC2_1070.AT1G15175	chr1	5224009	5224256	248	*	95	3.86452	9.54961	7.74717	MYC2_1070	AT1G15175	5222913	5224121	-	overlapStart	112	112	Upstream
MYC2_1070.AT1G15180	chr1	5224009	5224256	248	*	95	3.86452	9.54961	7.74717	MYC2_1070	AT1G15180	5224385	5226702	+	upstream	-376	129	Upstream
MYC2_1072.AT1G15210	chr1	5236799	5237179	381	*	387	10.0914	38.733	36.333	MYC2_1072	AT1G15210	5231348	5236573	-	upstream	-226	226	Upstream
MYC2_1072.AT1G15215	chr1	5236799	5237179	381	*	387	10.0914	38.733	36.333	MYC2_1072	AT1G15215	5238065	5240051	+	upstream	-1266	886	Upstream
MYC2_1073.AT1G15210	chr1	5237339	5237677	339	*	43	2.80843	4.30362	2.78584	MYC2_1073	AT1G15210	5231348	5236573	-	upstream	-766	766	Upstream
MYC2_1073.AT1G15215	chr1	5237339	5237677	339	*	43	2.80843	4.30362	2.78584	MYC2_1073	AT1G15215	5238065	5240051	+	upstream	-726	388	Upstream
MYC2_1074.AT1G15220	chr1	5241388	5241641	254	*	52	3.09864	5.29522	3.7208	MYC2_1074	AT1G15220	5240029	5241538	-	overlapStart	150	103	Upstream
MYC2_1075.AT1G15290	chr1	5264988	5265560	573	*	219	6.62887	21.964	19.7965	MYC2_1075	AT1G15290	5257046	5264942	-	upstream	-46	46	Upstream
MYC2_1076.AT1G15310	chr1	5272004	5272195	192	*	57	3.22499	5.78026	4.1672	MYC2_1076	AT1G15310	5269019	5272058	-	overlapStart	54	54	Upstream
MYC2_1077.AT1G15320	chr1	5274124	5274335	212	*	53	3.0473	5.3756	3.79935	MYC2_1077	AT1G15320	5272256	5274074	-	upstream	-50	50	Upstream
MYC2_1077.AT1G15330	chr1	5274124	5274335	212	*	53	3.0473	5.3756	3.79935	MYC2_1077	AT1G15330	5274346	5275602	+	upstream	-222	11	Upstream
MYC2_1078.AT1G15340	chr1	5277511	5278074	564	*	89	4.19172	8.98699	7.1942	MYC2_1078	AT1G15340	5275677	5277689	-	overlapStart	178	178	Upstream
MYC2_1079.AT1G15350	chr1	5279787	5280346	560	*	209	7.13327	20.9482	18.8004	MYC2_1079	AT1G15350	5278260	5279877	-	overlapStart	90	90	Upstream
MYC2_1080.AT1G15360	chr1	5281647	5282888	1242	*	718	16.1008	71.8745	69.1787	MYC2_1080	AT1G15360	5283538	5284673	+	upstream	-1891	650	Upstream
MYC2_1081.AT1G15360	chr1	5283084	5283352	269	*	74	3.87235	7.44433	5.72108	MYC2_1081	AT1G15360	5283538	5284673	+	upstream	-454	186	Upstream
MYC2_1082.AT1G15370	chr1	5286498	5286997	500	*	96	4.48377	9.64772	7.82338	MYC2_1082	AT1G15370	5287047	5288577	+	upstream	-549	50	Upstream
MYC2_1084.AT1G15380	chr1	5289887	5290125	239	*	88	4.27996	8.89315	7.10093	MYC2_1084	AT1G15380	5290745	5292535	+	upstream	-858	620	Upstream
MYC2_1087.AT1G15400	chr1	5296750	5296940	191	*	31	2.44569	3.12521	1.71436	MYC2_1087	AT1G15400	5295773	5296902	-	overlapStart	152	38	Upstream
MYC2_1088.AT1G15405	chr1	5298654	5299151	498	*	184	5.96598	18.4241	16.3353	MYC2_1088	AT1G15405	5297875	5298166	-	upstream	-488	488	Upstream
MYC2_1090.AT1G15415	chr1	5301163	5301600	438	*	156	5.83852	15.6544	13.6338	MYC2_1090	AT1G15415	5300742	5301412	-	overlapStart	249	188	Upstream
MYC2_1091.AT1G15420	chr1	5303376	5303621	246	*	47	2.9144	4.70436	3.17472	MYC2_1091	AT1G15420	5301613	5303390	-	overlapStart	14	14	Upstream
MYC2_1091.AT1G15430	chr1	5303376	5303621	246	*	47	2.9144	4.70436	3.17472	MYC2_1091	AT1G15430	5304317	5306012	+	upstream	-941	696	Upstream
MYC2_1092.AT1G15420	chr1	5303967	5304491	525	*	164	5.84608	16.4786	14.435	MYC2_1092	AT1G15420	5301613	5303390	-	upstream	-577	577	Upstream
MYC2_1092.AT1G15430	chr1	5303967	5304491	525	*	164	5.84608	16.4786	14.435	MYC2_1092	AT1G15430	5304317	5306012	+	overlapStart	-350	174	Upstream
MYC2_1093.AT1G15440	chr1	5309631	5309838	208	*	34	2.56122	3.48664	2.0617	MYC2_1093	AT1G15440	5306061	5309514	-	upstream	-117	117	Upstream
MYC2_1093.AT1G15450	chr1	5309631	5309838	208	*	34	2.56122	3.48664	2.0617	MYC2_1093	AT1G15450	5309647	5309718	-	includeFeature	87	16	Upstream
MYC2_1094.AT1G15470	chr1	5315099	5315512	414	*	21	2.03808	2.15698	0.872271	MYC2_1094	AT1G15470	5315507	5317863	+	overlapStart	-408	5	Upstream
MYC2_1095.AT1G15500	chr1	5325188	5325509	322	*	49	2.95032	4.96593	3.40022	MYC2_1095	AT1G15500	5326290	5328874	+	upstream	-1102	781	Upstream
MYC2_1096.AT1G15520	chr1	5338272	5338456	185	*	34	2.53249	3.43008	2.00836	MYC2_1096	AT1G15520	5331858	5338326	-	overlapStart	54	54	Upstream
MYC2_1097.AT1G15520	chr1	5339065	5339687	623	*	51	3.11692	5.13629	3.56652	MYC2_1097	AT1G15520	5331858	5338326	-	upstream	-739	739	Upstream
MYC2_1098.AT1G15530	chr1	5341996	5342459	464	*	157	5.87574	15.7436	13.7223	MYC2_1098	AT1G15530	5339961	5341931	-	upstream	-65	65	Upstream
MYC2_1098.AT1G15540	chr1	5341996	5342459	464	*	157	5.87574	15.7436	13.7223	MYC2_1098	AT1G15540	5342587	5343705	+	upstream	-591	128	Upstream
MYC2_1104.AT1G15570	chr1	5360298	5361519	1222	*	457	11.8208	45.7138	43.2382	MYC2_1104	AT1G15570	5362009	5365549	+	upstream	-1711	490	Upstream
MYC2_1105.AT1G15570	chr1	5361844	5362247	404	*	20	1.90903	2.00568	0.776836	MYC2_1105	AT1G15570	5362009	5365549	+	overlapStart	-165	165	Upstream
MYC2_1106.AT1G15580	chr1	5366495	5367231	737	*	718	16.1008	71.8745	69.1787	MYC2_1106	AT1G15580	5365665	5366497	-	overlapStart	2	2	Upstream
MYC2_1106.AT1G15590	chr1	5366495	5367231	737	*	718	16.1008	71.8745	69.1787	MYC2_1106	AT1G15590	5367297	5368670	+	upstream	-802	66	Upstream
MYC2_1107.AT1G15610	chr1	5370033	5370298	266	*	88	4.27996	8.89315	7.10093	MYC2_1107	AT1G15610	5370677	5371859	+	upstream	-644	379	Upstream
MYC2_1108.AT1G15640	chr1	5378694	5378878	185	*	26	2.24189	2.62363	1.2736	MYC2_1108	AT1G15640	5378886	5380139	+	upstream	-192	8	Upstream
MYC2_1109.AT1G15650	chr1	5380764	5381114	351	*	133	5.34054	13.3131	11.3666	MYC2_1109	AT1G15650	5380907	5380988	+	includeFeature	-143	126	Upstream
MYC2_1109.AT1G15660	chr1	5380764	5381114	351	*	133	5.34054	13.3131	11.3666	MYC2_1109	AT1G15660	5381170	5385254	+	upstream	-406	56	Upstream
MYC2_1112.AT1G15670	chr1	5387461	5389419	1959	*	565	13.6551	56.5825	54.0171	MYC2_1112	AT1G15670	5389952	5391490	+	upstream	-2491	533	Upstream
MYC2_1116.AT1G15690	chr1	5398632	5398910	279	*	24	2.08258	2.42551	1.12665	MYC2_1116	AT1G15690	5398990	5402733	+	upstream	-358	80	Upstream
MYC2_1117.AT1G15710	chr1	5403626	5403817	192	*	43	2.73304	4.30828	2.79044	MYC2_1117	AT1G15710	5404358	5405686	+	upstream	-732	541	Upstream
MYC2_1118.AT1G15720	chr1	5405843	5406074	232	*	63	3.37716	6.34271	4.69052	MYC2_1118	AT1G15720	5406025	5407486	+	overlapStart	-182	49	Upstream
MYC2_1119.AT1G15730	chr1	5410710	5410901	192	*	42	2.76437	4.21108	2.70893	MYC2_1119	AT1G15730	5407401	5409987	-	upstream	-723	723	Upstream
MYC2_1119.AT1G15740	chr1	5410710	5410901	192	*	42	2.76437	4.21108	2.70893	MYC2_1119	AT1G15740	5410908	5414919	+	upstream	-198	7	Upstream
MYC2_1121.AT1G15750	chr1	5420820	5421752	933	*	410	11.0056	41.0709	38.6397	MYC2_1121	AT1G15750	5414817	5421033	-	overlapStart	213	213	Upstream
MYC2_1124.AT1G15757	chr1	5425230	5425489	260	*	17	1.83427	1.72792	0.517312	MYC2_1124	AT1G15757	5424242	5424576	-	upstream	-654	654	Upstream
MYC2_1124.AT1G15760	chr1	5425230	5425489	260	*	17	1.83427	1.72792	0.517312	MYC2_1124	AT1G15760	5425714	5426322	+	upstream	-484	225	Upstream
MYC2_1125.AT1G15780	chr1	5436301	5436781	481	*	36	2.6495	3.65933	2.19401	MYC2_1125	AT1G15780	5430183	5436412	-	overlapStart	111	111	Upstream
MYC2_1127.AT1G15800	chr1	5443607	5443933	327	*	53	3.1373	5.38003	3.80374	MYC2_1127	AT1G15800	5441082	5443684	-	overlapStart	77	77	Upstream
MYC2_1127.AT1G15810	chr1	5443607	5443933	327	*	53	3.1373	5.38003	3.80374	MYC2_1127	AT1G15810	5444418	5446564	+	upstream	-811	485	Upstream
MYC2_1128.AT1G15820	chr1	5447897	5448140	244	*	38	2.66365	3.84171	2.37152	MYC2_1128	AT1G15820	5446462	5447859	-	upstream	-38	38	Upstream
MYC2_1128.AT1G15830	chr1	5447897	5448140	244	*	38	2.66365	3.84171	2.37152	MYC2_1128	AT1G15830	5448726	5450177	+	upstream	-829	586	Upstream
MYC2_1129.AT1G15850	chr1	5454337	5454752	416	*	26	2.24189	2.62363	1.2736	MYC2_1129	AT1G15850	5453245	5454088	-	upstream	-249	249	Upstream
MYC2_1129.AT1G15860	chr1	5454337	5454752	416	*	26	2.24189	2.62363	1.2736	MYC2_1129	AT1G15860	5454785	5457022	+	upstream	-448	33	Upstream
MYC2_1130.AT1G15940	chr1	5472940	5473572	633	*	33	2.51532	3.39619	1.97525	MYC2_1130	AT1G15940	5473565	5478259	+	overlapStart	-625	7	Upstream
MYC2_1134.AT1G15960	chr1	5485656	5485900	245	*	26	2.24189	2.62363	1.2736	MYC2_1134	AT1G15960	5481665	5485082	-	upstream	-574	574	Upstream
MYC2_1135.AT1G15970	chr1	5488863	5489209	347	*	41	2.73225	4.1433	2.66145	MYC2_1135	AT1G15970	5486319	5488868	-	overlapStart	5	5	Upstream
MYC2_1135.AT1G15980	chr1	5488863	5489209	347	*	41	2.73225	4.1433	2.66145	MYC2_1135	AT1G15980	5489298	5491363	+	upstream	-435	89	Upstream
MYC2_1136.AT1G16010	chr1	5497764	5498136	373	*	28	2.23879	2.84195	1.48266	MYC2_1136	AT1G16010	5495373	5497723	-	upstream	-41	41	Upstream
MYC2_1136.AT1G16020	chr1	5497764	5498136	373	*	28	2.23879	2.84195	1.48266	MYC2_1136	AT1G16020	5498165	5501358	+	upstream	-401	29	Upstream
MYC2_1138.AT1G16100	chr1	5518140	5518391	252	*	39	2.43414	3.90547	2.43215	MYC2_1138	AT1G16100	5518062	5518134	-	upstream	-6	6	Upstream
MYC2_1138.AT1G16110	chr1	5518140	5518391	252	*	39	2.43414	3.90547	2.43215	MYC2_1138	AT1G16110	5518373	5520891	+	overlapStart	-233	18	Upstream
MYC2_1139.AT1G16130	chr1	5525257	5525468	212	*	49	2.95311	4.97218	3.40639	MYC2_1139	AT1G16130	5525491	5528212	+	upstream	-234	23	Upstream
MYC2_1140.AT1G16170	chr1	5539662	5540017	356	*	51	3.03087	5.14553	3.57559	MYC2_1140	AT1G16170	5538732	5539821	-	overlapStart	159	159	Upstream
MYC2_1140.AT1G16180	chr1	5539662	5540017	356	*	51	3.03087	5.14553	3.57559	MYC2_1140	AT1G16180	5540427	5542902	+	upstream	-765	410	Upstream
MYC2_1141.AT1G16240	chr1	5556815	5556999	185	*	27	2.18233	2.72692	1.37256	MYC2_1141	AT1G16240	5555007	5556841	-	overlapStart	26	26	Upstream
MYC2_1141.AT1G16250	chr1	5556815	5556999	185	*	27	2.18233	2.72692	1.37256	MYC2_1141	AT1G16250	5556989	5559520	+	overlapStart	-174	10	Upstream
MYC2_1142.AT1G16260	chr1	5562551	5563056	506	*	87	4.0732	8.71243	6.94552	MYC2_1142	AT1G16260	5559579	5562113	-	upstream	-438	438	Upstream
MYC2_1142.AT1G16270	chr1	5562551	5563056	506	*	87	4.0732	8.71243	6.94552	MYC2_1142	AT1G16270	5563087	5568368	+	upstream	-536	31	Upstream
MYC2_1143.AT1G16290	chr1	5573930	5574419	490	*	266	7.8449	26.6706	24.4281	MYC2_1143	AT1G16290	5570753	5573538	-	upstream	-392	392	Upstream
MYC2_1143.AT1G16300	chr1	5573930	5574419	490	*	266	7.8449	26.6706	24.4281	MYC2_1143	AT1G16300	5574310	5577622	+	overlapStart	-380	109	Upstream
MYC2_1145.AT1G16360	chr1	5596061	5596902	842	*	1553	27.9217	155.308	151.384	MYC2_1145	AT1G16360	5593301	5595179	-	upstream	-882	882	Upstream
MYC2_1145.AT1G16370	chr1	5596061	5596902	842	*	1553	27.9217	155.308	151.384	MYC2_1145	AT1G16370	5596694	5598447	+	overlapStart	-633	208	Upstream
MYC2_1146.AT1G16390	chr1	5602667	5602923	257	*	21	1.97083	2.12146	0.872271	MYC2_1146	AT1G16390	5602873	5604663	+	overlapStart	-206	50	Upstream
MYC2_1147.AT1G16410	chr1	5608654	5608838	185	*	36	2.6495	3.65933	2.19401	MYC2_1147	AT1G16410	5608807	5611426	+	overlapStart	-153	31	Upstream
MYC2_1148.AT1G16420	chr1	5614192	5614487	296	*	26	2.24189	2.62363	1.2736	MYC2_1148	AT1G16420	5612150	5613867	-	upstream	-325	325	Upstream
MYC2_1148.AT1G16430	chr1	5614192	5614487	296	*	26	2.24189	2.62363	1.2736	MYC2_1148	AT1G16430	5614619	5615510	+	upstream	-427	132	Upstream
MYC2_1149.AT1G16450	chr1	5619421	5619607	187	*	47	2.93243	4.74324	3.2128	MYC2_1149	AT1G16450	5619471	5619543	-	includeFeature	122	50	Upstream
MYC2_1150.AT1G16460	chr1	5622560	5622774	215	*	49	2.85427	4.92532	3.36063	MYC2_1150	AT1G16460	5619582	5622663	-	overlapStart	103	103	Upstream
MYC2_1150.AT1G16470	chr1	5622560	5622774	215	*	49	2.85427	4.92532	3.36063	MYC2_1150	AT1G16470	5622786	5625643	+	upstream	-226	12	Upstream
MYC2_1152.AT1G16500	chr1	5638165	5638697	533	*	209	7.13327	20.9482	18.8004	MYC2_1152	AT1G16500	5639032	5640173	+	upstream	-867	335	Upstream
MYC2_1157.AT1G16510	chr1	5645622	5647007	1386	*	332	9.57896	33.258	30.915	MYC2_1157	AT1G16510	5644572	5645443	-	upstream	-179	179	Upstream
MYC2_1159.AT1G16560	chr1	5668265	5668481	217	*	52	3.08737	5.27041	3.697	MYC2_1159	AT1G16560	5668384	5670708	+	overlapStart	-119	97	Upstream
MYC2_1160.AT1G16630	chr1	5685499	5685764	266	*	54	3.16508	5.44074	3.83508	MYC2_1160	AT1G16630	5682118	5684867	-	upstream	-632	632	Upstream
MYC2_1160.AT1G16640	chr1	5685499	5685764	266	*	54	3.16508	5.44074	3.83508	MYC2_1160	AT1G16640	5686603	5687715	+	upstream	-1104	839	Upstream
MYC2_1161.AT1G16640	chr1	5686071	5686269	199	*	42	2.78234	4.24889	2.73362	MYC2_1161	AT1G16640	5686603	5687715	+	upstream	-532	334	Upstream
MYC2_1162.AT1G16650	chr1	5687689	5687978	290	*	135	5.14963	13.5797	11.6305	MYC2_1162	AT1G16650	5687943	5691198	+	overlapStart	-254	35	Upstream
MYC2_1163.AT1G16660	chr1	5691276	5691734	459	*	63	3.36343	6.31119	4.66008	MYC2_1163	AT1G16660	5692024	5696458	+	upstream	-748	290	Upstream
MYC2_1164.AT1G16670	chr1	5696928	5697367	440	*	103	4.50192	10.3135	8.47924	MYC2_1164	AT1G16670	5697324	5699769	+	overlapStart	-396	43	Upstream
MYC2_1165.AT1G16730	chr1	5727329	5727778	450	*	55	3.2191	5.55816	3.94969	MYC2_1165	AT1G16730	5726368	5727312	-	upstream	-17	17	Upstream
MYC2_1165.AT1G16740	chr1	5727329	5727778	450	*	55	3.2191	5.55816	3.94969	MYC2_1165	AT1G16740	5727690	5729080	+	overlapStart	-361	88	Upstream
MYC2_1166.AT1G16750	chr1	5731834	5732174	341	*	31	2.44569	3.12521	1.71436	MYC2_1166	AT1G16750	5729097	5731870	-	overlapStart	36	36	Upstream
MYC2_1167.AT1G16750	chr1	5732701	5733011	311	*	26	2.24189	2.62363	1.2736	MYC2_1167	AT1G16750	5729097	5731870	-	upstream	-831	831	Upstream
MYC2_1168.AT1G16820	chr1	5758306	5758582	277	*	38	2.53713	3.87038	2.39866	MYC2_1168	AT1G16820	5756835	5758464	-	overlapStart	158	118	Upstream
MYC2_1168.AT1G16825	chr1	5758306	5758582	277	*	38	2.53713	3.87038	2.39866	MYC2_1168	AT1G16825	5758855	5760501	+	upstream	-549	273	Upstream
MYC2_1169.AT1G16850	chr1	5765575	5765930	356	*	271	7.82079	27.1175	24.8622	MYC2_1169	AT1G16850	5764807	5765651	-	overlapStart	76	76	Upstream
MYC2_1170.AT1G16850	chr1	5766236	5766516	281	*	54	3.25669	5.4283	3.83145	MYC2_1170	AT1G16850	5764807	5765651	-	upstream	-585	585	Upstream
MYC2_1170.AT1G16858	chr1	5766236	5766516	281	*	54	3.25669	5.4283	3.83145	MYC2_1170	AT1G16858	5767300	5770602	+	upstream	-1064	784	Upstream
MYC2_1170.AT1G16860	chr1	5766236	5766516	281	*	54	3.25669	5.4283	3.83145	MYC2_1170	AT1G16860	5767300	5770602	+	upstream	-1064	784	Upstream
MYC2_1171.AT1G16870	chr1	5773358	5773625	268	*	64	3.31443	6.41664	4.76332	MYC2_1171	AT1G16870	5770732	5773251	-	upstream	-107	107	Upstream
MYC2_1171.AT1G16880	chr1	5773358	5773625	268	*	64	3.31443	6.41664	4.76332	MYC2_1171	AT1G16880	5773592	5776308	+	overlapStart	-234	33	Upstream
MYC2_1172.AT1G17020	chr1	5819921	5820167	247	*	42	2.85331	4.2239	2.70893	MYC2_1172	AT1G17020	5820206	5822013	+	upstream	-285	39	Upstream
MYC2_1173.AT1G17040	chr1	5824630	5824893	264	*	17	1.83427	1.72792	0.517312	MYC2_1173	AT1G17040	5824848	5828233	+	overlapStart	-218	45	Upstream
MYC2_1174.AT1G17050	chr1	5828452	5828792	341	*	31	2.43755	3.10977	1.71436	MYC2_1174	AT1G17050	5829080	5831343	+	upstream	-628	288	Upstream
MYC2_1177.AT1G17060	chr1	5835302	5835803	502	*	104	4.68758	10.4212	8.56585	MYC2_1177	AT1G17060	5832097	5835456	-	overlapStart	154	154	Upstream
MYC2_1178.AT1G17080	chr1	5841577	5841887	311	*	26	2.24189	2.62363	1.2736	MYC2_1178	AT1G17080	5840269	5841606	-	overlapStart	29	29	Upstream
MYC2_1179.AT1G17090	chr1	5844166	5844513	348	*	35	2.61146	3.58511	2.15686	MYC2_1179	AT1G17090	5842216	5844283	-	overlapStart	117	117	Upstream
MYC2_1179.AT1G17100	chr1	5844166	5844513	348	*	35	2.61146	3.58511	2.15686	MYC2_1179	AT1G17100	5844676	5845661	+	upstream	-510	163	Upstream
MYC2_1180.AT1G17110	chr1	5850694	5851139	446	*	86	4.05067	8.6598	6.89342	MYC2_1180	AT1G17110	5845660	5850934	-	overlapStart	240	205	Upstream
MYC2_1180.AT1G17120	chr1	5850694	5851139	446	*	86	4.05067	8.6598	6.89342	MYC2_1180	AT1G17120	5851953	5853955	+	upstream	-1259	814	Upstream
MYC2_1181.AT1G17110	chr1	5851283	5851906	624	*	280	8.16913	28.0334	25.7635	MYC2_1181	AT1G17110	5845660	5850934	-	upstream	-349	349	Upstream
MYC2_1181.AT1G17120	chr1	5851283	5851906	624	*	280	8.16913	28.0334	25.7635	MYC2_1181	AT1G17120	5851953	5853955	+	upstream	-670	47	Upstream
MYC2_1182.AT1G17140	chr1	5858515	5858832	318	*	199	6.92946	19.9944	17.8664	MYC2_1182	AT1G17140	5856573	5858550	-	overlapStart	35	35	Upstream
MYC2_1184.AT1G17145	chr1	5863090	5863305	216	*	21	2.03808	2.15698	0.872271	MYC2_1184	AT1G17145	5860119	5862682	-	upstream	-408	408	Upstream
MYC2_1185.AT1G17147	chr1	5864385	5864887	503	*	81	4.07615	8.15838	6.39981	MYC2_1185	AT1G17147	5863431	5864009	-	upstream	-376	376	Upstream
MYC2_1185.AT1G17150	chr1	5864385	5864887	503	*	81	4.07615	8.15838	6.39981	MYC2_1185	AT1G17150	5865707	5867495	+	upstream	-1322	820	Upstream
MYC2_1186.AT1G17170	chr1	5869533	5869823	291	*	42	2.85331	4.2239	2.70893	MYC2_1186	AT1G17170	5869846	5870840	+	upstream	-313	23	Upstream
MYC2_1188.AT1G17190	chr1	5874508	5874850	343	*	36	2.6495	3.65933	2.19401	MYC2_1188	AT1G17190	5875350	5876545	+	upstream	-842	500	Upstream
MYC2_1189.AT1G17200	chr1	5877284	5877507	224	*	60	3.46473	6.08252	4.43613	MYC2_1189	AT1G17200	5878400	5880041	+	upstream	-1116	893	Upstream
MYC2_1190.AT1G17200	chr1	5878203	5878507	305	*	74	3.87235	7.44433	5.72108	MYC2_1190	AT1G17200	5878400	5880041	+	overlapStart	-197	107	Upstream
MYC2_1191.AT1G17230	chr1	5890657	5891222	566	*	233	6.80683	23.3701	21.1815	MYC2_1191	AT1G17230	5891324	5895075	+	upstream	-667	102	Upstream
MYC2_1192.AT1G17280	chr1	5920386	5920586	201	*	51	3.11844	5.1395	3.56962	MYC2_1192	AT1G17280	5916871	5920089	-	upstream	-297	297	Upstream
MYC2_1192.AT1G17285	chr1	5920386	5920586	201	*	51	3.11844	5.1395	3.56962	MYC2_1192	AT1G17285	5920774	5921415	+	upstream	-388	188	Upstream
MYC2_1193.AT1G17290	chr1	5922053	5922353	301	*	53	3.20604	5.32306	3.74801	MYC2_1193	AT1G17290	5922630	5926400	+	upstream	-577	277	Upstream
MYC2_1194.AT1G17290	chr1	5922471	5922773	303	*	65	3.59417	6.59271	4.93542	MYC2_1194	AT1G17290	5922630	5926400	+	overlapStart	-159	143	Upstream
MYC2_1195.AT1G17300	chr1	5926455	5926777	323	*	35	2.60491	3.5723	2.1444	MYC2_1195	AT1G17300	5926994	5927784	+	upstream	-539	217	Upstream
MYC2_1196.AT1G17310	chr1	5928784	5929186	403	*	48	3.05712	4.81704	3.25478	MYC2_1196	AT1G17310	5928014	5928667	-	upstream	-117	117	Upstream
MYC2_1196.AT1G17330	chr1	5928784	5929186	403	*	48	3.05712	4.81704	3.25478	MYC2_1196	AT1G17330	5929909	5931831	+	upstream	-1125	723	Upstream
MYC2_1198.AT1G17340	chr1	5932957	5933782	826	*	798	17.3237	79.8235	77.0527	MYC2_1198	AT1G17340	5933870	5938761	+	upstream	-913	88	Upstream
MYC2_1199.AT1G17350	chr1	5941122	5941331	210	*	48	3.05712	4.81704	3.25478	MYC2_1199	AT1G17350	5941784	5944463	+	upstream	-662	453	Upstream
MYC2_1200.AT1G17350	chr1	5941540	5941819	280	*	44	2.77677	4.4046	2.88432	MYC2_1200	AT1G17350	5941784	5944463	+	overlapStart	-244	35	Upstream
MYC2_1201.AT1G17360	chr1	5944707	5946314	1608	*	1106	21.522	110.616	107.41	MYC2_1201	AT1G17360	5946764	5951473	+	upstream	-2057	450	Upstream
MYC2_1202.AT1G17370	chr1	5954986	5955504	519	*	381	10.1175	38.1944	35.797	MYC2_1202	AT1G17370	5951542	5955037	-	overlapStart	51	51	Upstream
MYC2_1203.AT1G17380	chr1	5956676	5958840	2165	*	1512	24.6438	151.237	147.362	MYC2_1203	AT1G17380	5955488	5957212	-	overlapStart	536	536	Upstream
MYC2_1208.AT1G17420	chr1	5976267	5977805	1539	*	1949	33.0169	194.905	190.516	MYC2_1208	AT1G17420	5977411	5981480	+	overlapStart	-1144	394	Upstream
MYC2_1211.AT1G17430	chr1	5981904	5982144	241	*	44	2.77939	4.41036	2.88999	MYC2_1211	AT1G17430	5982267	5984013	+	upstream	-363	123	Upstream
MYC2_1212.AT1G17440	chr1	5987692	5988329	638	*	766	16.4038	76.6303	73.8926	MYC2_1212	AT1G17440	5983984	5987784	-	overlapStart	92	92	Upstream
MYC2_1213.AT1G17450	chr1	5997021	5997222	202	*	42	2.77461	4.23263	2.7175	MYC2_1213	AT1G17450	5988280	5996785	-	upstream	-236	236	Upstream
MYC2_1213.AT1G17455	chr1	5997021	5997222	202	*	42	2.77461	4.23263	2.7175	MYC2_1213	AT1G17455	5997180	5998475	+	overlapStart	-159	42	Upstream
MYC2_1214.AT1G17495	chr1	6014533	6015658	1126	*	1309	24.6607	130.983	127.349	MYC2_1214	AT1G17495	6009570	6013742	-	upstream	-791	791	Upstream
MYC2_1217.AT1G17550	chr1	6033875	6034579	705	*	575	13.1926	57.536	54.9667	MYC2_1217	AT1G17550	6034362	6037289	+	overlapStart	-487	217	Upstream
MYC2_1218.AT1G17560	chr1	6038728	6038966	239	*	88	4.14623	8.88207	7.10093	MYC2_1218	AT1G17560	6037464	6038692	-	upstream	-36	36	Upstream
MYC2_1218.AT1G17570	chr1	6038728	6038966	239	*	88	4.14623	8.88207	7.10093	MYC2_1218	AT1G17570	6038757	6038838	+	includeFeature	-29	29	Upstream
MYC2_1218.AT1G17580	chr1	6038728	6038966	239	*	88	4.14623	8.88207	7.10093	MYC2_1218	AT1G17580	6039303	6049556	+	upstream	-575	337	Upstream
MYC2_1220.AT1G17620	chr1	6061200	6061570	371	*	359	9.95893	35.979	33.6068	MYC2_1220	AT1G17620	6062216	6063291	+	upstream	-1016	646	Upstream
MYC2_1221.AT1G17620	chr1	6061772	6062375	604	*	863	17.9286	86.353	83.5144	MYC2_1221	AT1G17620	6062216	6063291	+	overlapStart	-444	159	Upstream
MYC2_1222.AT1G17630	chr1	6063209	6063966	758	*	168	6.15918	16.8334	14.7866	MYC2_1222	AT1G17630	6064525	6066720	+	upstream	-1316	559	Upstream
MYC2_1223.AT1G17660	chr1	6075725	6075909	185	*	30	2.41058	3.05858	1.68779	MYC2_1223	AT1G17660	6075820	6075891	+	includeFeature	-95	18	Upstream
MYC2_1223.AT1G17680	chr1	6075725	6075909	185	*	30	2.41058	3.05858	1.68779	MYC2_1223	AT1G17680	6076077	6082337	+	upstream	-352	168	Upstream
MYC2_1225.AT1G17720	chr1	6098110	6098695	586	*	140	5.50987	14.0875	12.1153	MYC2_1225	AT1G17720	6093208	6098383	-	overlapStart	273	273	Upstream
MYC2_1225.AT1G17730	chr1	6098110	6098695	586	*	140	5.50987	14.0875	12.1153	MYC2_1225	AT1G17730	6099089	6100315	+	upstream	-979	394	Upstream
MYC2_1226.AT1G17745	chr1	6100539	6101058	520	*	31	2.44569	3.12521	1.71436	MYC2_1226	AT1G17745	6100964	6105265	+	overlapStart	-425	94	Upstream
MYC2_1227.AT1G17744	chr1	6101690	6102411	722	*	88	4.27996	8.89315	7.10093	MYC2_1227	AT1G17744	6100961	6101983	-	overlapStart	293	293	Upstream
MYC2_1228.AT1G17744	chr1	6102683	6102983	301	*	17	1.83427	1.72792	0.517312	MYC2_1228	AT1G17744	6100961	6101983	-	upstream	-700	700	Upstream
MYC2_1231.AT1G17750	chr1	6105314	6106019	706	*	948	19.5655	94.8626	91.9162	MYC2_1231	AT1G17750	6106656	6110120	+	upstream	-1342	637	Upstream
MYC2_1232.AT1G17750	chr1	6106143	6106614	472	*	163	6.11423	16.3081	14.2657	MYC2_1232	AT1G17750	6106656	6110120	+	upstream	-513	42	Upstream
MYC2_1235.AT1G17830	chr1	6139273	6140387	1115	*	641	14.878	64.1222	61.4947	MYC2_1235	AT1G17830	6135803	6138432	-	upstream	-841	841	Upstream
MYC2_1236.AT1G17840	chr1	6141809	6142031	223	*	42	2.85331	4.2239	2.70893	MYC2_1236	AT1G17840	6142564	6146521	+	upstream	-755	533	Upstream
MYC2_1237.AT1G17840	chr1	6142367	6142584	218	*	42	2.85331	4.2239	2.70893	MYC2_1237	AT1G17840	6142564	6146521	+	overlapStart	-197	20	Upstream
MYC2_1238.AT1G17850	chr1	6148975	6149327	353	*	107	4.4204	10.7367	8.87707	MYC2_1238	AT1G17850	6145926	6148940	-	upstream	-35	35	Upstream
MYC2_1238.AT1G17860	chr1	6148975	6149327	353	*	107	4.4204	10.7367	8.87707	MYC2_1238	AT1G17860	6149301	6150038	+	overlapStart	-326	26	Upstream
MYC2_1239.AT1G17870	chr1	6152297	6152509	213	*	26	2.15516	2.67134	1.31858	MYC2_1239	AT1G17870	6149939	6152222	-	upstream	-75	75	Upstream
MYC2_1240.AT1G17940	chr1	6173563	6174024	462	*	26	2.24189	2.62363	1.2736	MYC2_1240	AT1G17940	6169341	6173222	-	upstream	-341	341	Upstream
MYC2_1242.AT1G17990	chr1	6194025	6194684	660	*	266	7.29426	26.6527	24.4102	MYC2_1242	AT1G17990	6192071	6194093	-	overlapStart	68	68	Upstream
MYC2_1243.AT1G18000	chr1	6196048	6196499	452	*	172	6.31804	17.2096	15.1446	MYC2_1243	AT1G18000	6194543	6196229	-	overlapStart	181	181	Upstream
MYC2_1244.AT1G18010	chr1	6199525	6199935	411	*	181	6.52185	18.1248	16.038	MYC2_1244	AT1G18010	6199898	6201484	+	overlapStart	-373	37	Upstream
MYC2_1245.AT1G18020	chr1	6201325	6201991	667	*	225	6.51932	22.5495	20.3782	MYC2_1245	AT1G18020	6202249	6203918	+	upstream	-924	258	Upstream
MYC2_1246.AT1G18030	chr1	6204210	6204408	199	*	29	2.28811	2.94195	1.57772	MYC2_1246	AT1G18030	6204343	6206988	+	overlapStart	-133	65	Upstream
MYC2_1247.AT1G18070	chr1	6218222	6218542	321	*	75	3.78717	7.51668	5.79257	MYC2_1247	AT1G18070	6213725	6218340	-	overlapStart	118	118	Upstream
MYC2_1248.AT1G18070	chr1	6219250	6220059	810	*	311	9.17135	31.1051	28.79	MYC2_1248	AT1G18070	6213725	6218340	-	upstream	-910	910	Upstream
MYC2_1248.AT1G18075	chr1	6219250	6220059	810	*	311	9.17135	31.1051	28.79	MYC2_1248	AT1G18075	6220648	6220833	+	upstream	-1398	589	Upstream
MYC2_1249.AT1G18090	chr1	6224286	6224484	199	*	19	1.86266	1.99183	0.764539	MYC2_1249	AT1G18090	6224501	6227822	+	upstream	-215	17	Upstream
MYC2_1250.AT1G18100	chr1	6230183	6230437	255	*	31	2.44569	3.12521	1.71436	MYC2_1250	AT1G18100	6227217	6230188	-	overlapStart	5	5	Upstream
MYC2_1254.AT1G18150	chr1	6247791	6247979	189	*	51	3.11844	5.1395	3.56962	MYC2_1254	AT1G18150	6244298	6247812	-	overlapStart	21	21	Upstream
MYC2_1254.AT1G18160	chr1	6247791	6247979	189	*	51	3.11844	5.1395	3.56962	MYC2_1254	AT1G18160	6248793	6254039	+	upstream	-1002	814	Upstream
MYC2_1255.AT1G18191	chr1	6263260	6263556	297	*	41	2.73225	4.1433	2.66145	MYC2_1255	AT1G18191	6262054	6262330	-	upstream	-930	930	Upstream
MYC2_1256.AT1G18200	chr1	6266774	6267919	1146	*	163	6.11423	16.3081	14.2657	MYC2_1256	AT1G18200	6265416	6266937	-	overlapStart	163	163	Upstream
MYC2_1257.AT1G18210	chr1	6268730	6268969	240	*	36	2.6495	3.65933	2.19401	MYC2_1257	AT1G18210	6266609	6268828	-	overlapStart	98	98	Upstream
MYC2_1258.AT1G18210	chr1	6269167	6269383	217	*	31	2.44569	3.12521	1.71436	MYC2_1258	AT1G18210	6266609	6268828	-	upstream	-339	339	Upstream
MYC2_1259.AT1G18250	chr1	6278345	6278637	293	*	28	2.30398	2.85493	1.4944	MYC2_1259	AT1G18250	6276788	6278150	-	upstream	-195	195	Upstream
MYC2_1262.AT1G18300	chr1	6298876	6299435	560	*	382	10.1574	38.2976	35.8998	MYC2_1262	AT1G18300	6299687	6301086	+	upstream	-811	252	Upstream
MYC2_1266.AT1G18330	chr1	6308104	6308841	738	*	168	5.54998	16.882	14.8348	MYC2_1266	AT1G18330	6305966	6308013	-	upstream	-91	91	Upstream
MYC2_1267.AT1G18350	chr1	6315330	6315632	303	*	126	5.06466	12.6574	10.736	MYC2_1267	AT1G18350	6315651	6316738	+	upstream	-321	19	Upstream
MYC2_1268.AT1G18370	chr1	6324212	6325143	932	*	300	8.96754	30.0428	27.7424	MYC2_1268	AT1G18370	6319650	6324222	-	overlapStart	10	10	Upstream
MYC2_1268.AT1G18390	chr1	6324212	6325143	932	*	300	8.96754	30.0428	27.7424	MYC2_1268	AT1G18390	6325642	6330098	+	upstream	-1430	499	Upstream
MYC2_1269.AT1G18390	chr1	6325524	6325890	367	*	26	2.24189	2.62363	1.2736	MYC2_1269	AT1G18390	6325642	6330098	+	overlapStart	-118	118	Upstream
MYC2_1270.AT1G18382	chr1	6327016	6327200	185	*	36	2.6495	3.65933	2.19401	MYC2_1270	AT1G18382	6326366	6326699	-	upstream	-317	317	Upstream
MYC2_1271.AT1G18400	chr1	6330690	6331445	756	*	154	5.91042	15.4207	13.4024	MYC2_1271	AT1G18400	6331398	6333743	+	overlapStart	-708	47	Upstream
MYC2_1276.AT1G18415	chr1	6345708	6345925	218	*	64	3.31443	6.41664	4.76332	MYC2_1276	AT1G18415	6343096	6345662	-	upstream	-46	46	Upstream
MYC2_1276.AT1G18430	chr1	6345708	6345925	218	*	64	3.31443	6.41664	4.76332	MYC2_1276	AT1G18430	6345764	6345835	+	includeFeature	-56	56	Upstream
MYC2_1276.AT1G18440	chr1	6345708	6345925	218	*	64	3.31443	6.41664	4.76332	MYC2_1276	AT1G18440	6345974	6347910	+	upstream	-266	49	Upstream
MYC2_1277.AT1G18460	chr1	6351981	6352472	492	*	52	3.05817	5.20599	3.6341	MYC2_1277	AT1G18460	6352470	6356113	+	overlapStart	-489	2	Upstream
MYC2_1278.AT1G18470	chr1	6360027	6360554	528	*	132	5.15065	13.2228	11.2777	MYC2_1278	AT1G18470	6356131	6360192	-	overlapStart	165	165	Upstream
MYC2_1279.AT1G18470	chr1	6360718	6361245	528	*	67	3.54074	6.71404	5.05354	MYC2_1279	AT1G18470	6356131	6360192	-	upstream	-526	526	Upstream
MYC2_1279.AT1G18480	chr1	6360718	6361245	528	*	67	3.54074	6.71404	5.05354	MYC2_1279	AT1G18480	6361629	6363007	+	upstream	-911	384	Upstream
MYC2_1280.AT1G18500	chr1	6368929	6369419	491	*	236	6.44087	23.6442	21.4545	MYC2_1280	AT1G18500	6369347	6373025	+	overlapStart	-418	72	Upstream
MYC2_1281.AT1G18550	chr1	6385168	6385489	322	*	76	3.64588	7.68868	5.96135	MYC2_1281	AT1G18550	6381503	6384340	-	upstream	-828	828	Upstream
MYC2_1281.AT1G18560	chr1	6385168	6385489	322	*	76	3.64588	7.68868	5.96135	MYC2_1281	AT1G18560	6385449	6388080	+	overlapStart	-281	40	Upstream
MYC2_1282.AT1G18570	chr1	6388064	6388954	891	*	74	3.87235	7.44433	5.72108	MYC2_1282	AT1G18570	6389411	6391267	+	upstream	-1347	457	Upstream
MYC2_1286.AT1G18590	chr1	6398332	6398638	307	*	163	6.11423	16.3081	14.2657	MYC2_1286	AT1G18590	6398580	6399942	+	overlapStart	-248	58	Upstream
MYC2_1287.AT1G18610	chr1	6405311	6405495	185	*	31	2.44569	3.12521	1.71436	MYC2_1287	AT1G18610	6405645	6409297	+	upstream	-334	150	Upstream
MYC2_1288.AT1G18620	chr1	6409472	6409847	376	*	47	3.01929	4.73993	3.2096	MYC2_1288	AT1G18620	6409978	6414451	+	upstream	-506	131	Upstream
MYC2_1289.AT1G18640	chr1	6418825	6419089	265	*	126	4.80593	12.6976	10.7757	MYC2_1289	AT1G18640	6416357	6418690	-	upstream	-135	135	Upstream
MYC2_1290.AT1G18670	chr1	6430967	6431361	395	*	62	3.42632	6.22789	4.57863	MYC2_1290	AT1G18670	6426898	6430696	-	upstream	-271	271	Upstream
MYC2_1291.AT1G18670	chr1	6431498	6431931	434	*	61	3.40039	6.17087	4.52225	MYC2_1291	AT1G18670	6426898	6430696	-	upstream	-802	802	Upstream
MYC2_1296.AT1G18710	chr1	6449462	6449976	515	*	172	6.31804	17.2096	15.1446	MYC2_1296	AT1G18710	6450594	6453114	+	upstream	-1132	618	Upstream
MYC2_1297.AT1G18710	chr1	6450353	6450794	442	*	136	5.50281	13.6902	11.7224	MYC2_1297	AT1G18710	6450594	6453114	+	overlapStart	-241	200	Upstream
MYC2_1302.AT1G18720	chr1	6460242	6460545	304	*	60	3.46473	6.08252	4.43613	MYC2_1302	AT1G18720	6457821	6459751	-	upstream	-491	491	Upstream
MYC2_1302.AT1G18730	chr1	6460242	6460545	304	*	60	3.46473	6.08252	4.43613	MYC2_1302	AT1G18730	6460598	6462224	+	upstream	-356	53	Upstream
MYC2_1303.AT1G18735	chr1	6462338	6462953	616	*	289	8.76373	28.9902	26.7052	MYC2_1303	AT1G18735	6461232	6461752	-	upstream	-586	586	Upstream
MYC2_1303.AT1G18740	chr1	6462338	6462953	616	*	289	8.76373	28.9902	26.7052	MYC2_1303	AT1G18740	6463922	6465476	+	upstream	-1584	969	Upstream
MYC2_1304.AT1G18740	chr1	6463285	6464257	973	*	944	19.0877	94.4848	91.546	MYC2_1304	AT1G18740	6463922	6465476	+	overlapStart	-637	335	Upstream
MYC2_1306.AT1G18745	chr1	6466451	6466640	190	*	42	2.80055	4.28711	2.77026	MYC2_1306	AT1G18745	6465487	6466454	-	overlapStart	3	3	Upstream
MYC2_1306.AT1G18750	chr1	6466451	6466640	190	*	42	2.80055	4.28711	2.77026	MYC2_1306	AT1G18750	6466761	6469984	+	upstream	-310	121	Upstream
MYC2_1307.AT1G18800	chr1	6484212	6484493	282	*	26	2.24189	2.62363	1.2736	MYC2_1307	AT1G18800	6481113	6483596	-	upstream	-616	616	Upstream
MYC2_1309.AT1G18810	chr1	6487926	6488445	520	*	36	2.6495	3.65933	2.19401	MYC2_1309	AT1G18810	6485596	6487030	-	upstream	-896	896	Upstream
MYC2_1309.AT1G18820	chr1	6487926	6488445	520	*	36	2.6495	3.65933	2.19401	MYC2_1309	AT1G18820	6488655	6488735	+	upstream	-729	210	Upstream
MYC2_1309.AT1G18830	chr1	6487926	6488445	520	*	36	2.6495	3.65933	2.19401	MYC2_1309	AT1G18830	6489309	6494218	+	upstream	-1383	864	Upstream
MYC2_1311.AT1G18835	chr1	6496892	6497336	445	*	565	13.6551	56.5825	54.0171	MYC2_1311	AT1G18835	6496098	6496396	-	upstream	-496	496	Upstream
MYC2_1312.AT1G18850	chr1	6506467	6506654	188	*	17	1.8215	1.7731	0.559181	MYC2_1312	AT1G18850	6504806	6506424	-	upstream	-43	43	Upstream
MYC2_1313.AT1G18860	chr1	6507679	6508587	909	*	190	6.72566	19.0532	16.9457	MYC2_1313	AT1G18860	6509492	6511227	+	upstream	-1813	905	Upstream
MYC2_1315.AT1G18890	chr1	6526940	6527277	338	*	26	2.24189	2.62363	1.2736	MYC2_1315	AT1G18890	6522764	6525962	-	upstream	-978	978	Upstream
MYC2_1317.AT1G18900	chr1	6528353	6528716	364	*	38	2.6831	3.88128	2.40855	MYC2_1317	AT1G18900	6528984	6532614	+	upstream	-631	268	Upstream
MYC2_1318.AT1G18910	chr1	6538141	6538848	708	*	61	3.29741	6.15888	4.5105	MYC2_1318	AT1G18910	6532559	6538145	-	overlapStart	4	4	Upstream
MYC2_1319.AT1G18970	chr1	6555794	6555996	203	*	47	2.9144	4.70436	3.17472	MYC2_1319	AT1G18970	6554568	6555377	-	upstream	-417	417	Upstream
MYC2_1320.AT1G18990	chr1	6560740	6561189	450	*	228	7.54089	22.8919	20.7065	MYC2_1320	AT1G18990	6558678	6560489	-	upstream	-251	251	Upstream
MYC2_1321.AT1G19000	chr1	6562736	6563306	571	*	154	5.91042	15.4207	13.4024	MYC2_1321	AT1G19000	6560792	6562786	-	overlapStart	50	50	Upstream
MYC2_1323.AT1G19020	chr1	6567681	6568278	598	*	128	5.299	12.8481	10.9066	MYC2_1323	AT1G19020	6568073	6568597	+	overlapStart	-392	205	Upstream
MYC2_1323.AT1G19025	chr1	6567681	6568278	598	*	128	5.299	12.8481	10.9066	MYC2_1323	AT1G19025	6568853	6570939	+	upstream	-1172	575	Upstream
MYC2_1324.AT1G19050	chr1	6579094	6579679	586	*	129	4.75712	12.9034	10.9615	MYC2_1324	AT1G19050	6577833	6579178	-	overlapStart	84	84	Upstream
MYC2_1325.AT1G19050	chr1	6579887	6580377	491	*	48	3.05712	4.81704	3.25478	MYC2_1325	AT1G19050	6577833	6579178	-	upstream	-709	709	Upstream
MYC2_1326.AT1G19110	chr1	6601701	6602054	354	*	129	4.91679	12.986	11.0429	MYC2_1326	AT1G19110	6602126	6605908	+	upstream	-425	72	Upstream
MYC2_1328.AT1G19180	chr1	6620575	6624212	3638	*	2228	36.4816	222.803	218.118	MYC2_1328	AT1G19180	6622094	6623620	+	includeFeature	-1519	592	Upstream
MYC2_1328.AT1G19190	chr1	6620575	6624212	3638	*	2228	36.4816	222.803	218.118	MYC2_1328	AT1G19190	6623876	6624977	+	overlapStart	-3301	336	Upstream
MYC2_1330.AT1G19200	chr1	6626617	6626959	343	*	181	6.36962	18.1959	16.1086	MYC2_1330	AT1G19200	6625020	6625856	-	upstream	-761	761	Upstream
MYC2_1331.AT1G19210	chr1	6627577	6628225	649	*	1443	25.652	144.311	140.517	MYC2_1331	AT1G19210	6626822	6627530	-	upstream	-47	47	Upstream
MYC2_1332.AT1G19220	chr1	6633553	6633815	263	*	60	3.46473	6.08252	4.43613	MYC2_1332	AT1G19220	6628068	6633087	-	upstream	-466	466	Upstream
MYC2_1337.AT1G19240	chr1	6650376	6650711	336	*	34	2.46412	3.43061	2.00882	MYC2_1337	AT1G19240	6649243	6650420	-	overlapStart	44	44	Upstream
MYC2_1338.AT1G19250	chr1	6653072	6653348	277	*	228	7.54089	22.8919	20.7065	MYC2_1338	AT1G19250	6650529	6653078	-	overlapStart	6	6	Upstream
MYC2_1341.AT1G19270	chr1	6662318	6662805	488	*	88	4.27996	8.89315	7.10093	MYC2_1341	AT1G19270	6662501	6666028	+	overlapStart	-183	183	Upstream
MYC2_1344.AT1G19300	chr1	6672231	6673785	1555	*	468	12.0247	46.8934	44.4074	MYC2_1344	AT1G19300	6671137	6672653	-	overlapStart	422	422	Upstream
MYC2_1347.AT1G19310	chr1	6677508	6678093	586	*	423	9.88611	42.3889	39.9455	MYC2_1347	AT1G19310	6676234	6677673	-	overlapStart	165	165	Upstream
MYC2_1348.AT1G19330	chr1	6683508	6683906	399	*	123	4.91806	12.301	10.3838	MYC2_1348	AT1G19330	6680563	6683533	-	overlapStart	25	25	Upstream
MYC2_1348.AT1G19340	chr1	6683508	6683906	399	*	123	4.91806	12.301	10.3838	MYC2_1348	AT1G19340	6684751	6687116	+	upstream	-1243	845	Upstream
MYC2_1349.AT1G19330	chr1	6684231	6684606	376	*	74	3.87235	7.44433	5.72108	MYC2_1349	AT1G19330	6680563	6683533	-	upstream	-698	698	Upstream
MYC2_1349.AT1G19340	chr1	6684231	6684606	376	*	74	3.87235	7.44433	5.72108	MYC2_1349	AT1G19340	6684751	6687116	+	upstream	-520	145	Upstream
MYC2_1350.AT1G19350	chr1	6686913	6687963	1051	*	681	15.2682	68.1773	65.5158	MYC2_1350	AT1G19350	6688522	6690414	+	upstream	-1609	559	Upstream
MYC2_1351.AT1G19350	chr1	6688254	6688980	727	*	61	3.40684	6.18506	4.53636	MYC2_1351	AT1G19350	6688522	6690414	+	overlapStart	-268	268	Upstream
MYC2_1352.AT1G19373	chr1	6696669	6698311	1643	*	181	6.36962	18.1959	16.1086	MYC2_1352	AT1G19373	6697178	6697253	+	includeFeature	-509	509	Upstream
MYC2_1352.AT1G19376	chr1	6696669	6698311	1643	*	181	6.36962	18.1959	16.1086	MYC2_1352	AT1G19376	6697438	6697524	+	includeFeature	-769	769	Upstream
MYC2_1352.AT1G19380	chr1	6696669	6698311	1643	*	181	6.36962	18.1959	16.1086	MYC2_1352	AT1G19380	6698058	6698824	+	overlapStart	-1389	253	Upstream
MYC2_1354.AT1G19430	chr1	6728668	6728909	242	*	35	2.6036	3.56975	2.14191	MYC2_1354	AT1G19430	6724573	6728040	-	upstream	-628	628	Upstream
MYC2_1354.AT1G19440	chr1	6728668	6728909	242	*	35	2.6036	3.56975	2.14191	MYC2_1354	AT1G19440	6728984	6730931	+	upstream	-316	75	Upstream
MYC2_1356.AT1G19450	chr1	6734795	6735770	976	*	36	2.6495	3.65933	2.19401	MYC2_1356	AT1G19450	6731434	6734882	-	overlapStart	87	87	Upstream
MYC2_1357.AT1G19460	chr1	6737637	6738230	594	*	343	9.78277	34.3482	31.9919	MYC2_1357	AT1G19460	6738484	6739734	+	upstream	-847	254	Upstream
MYC2_1358.AT1G19540	chr1	6765425	6765628	204	*	33	2.42967	3.3587	1.939	MYC2_1358	AT1G19540	6765667	6767341	+	upstream	-242	39	Upstream
MYC2_1359.AT1G19550	chr1	6768119	6768356	238	*	54	3.26092	5.43708	3.83145	MYC2_1359	AT1G19550	6767451	6767983	-	upstream	-136	136	Upstream
MYC2_1360.AT1G19550	chr1	6768821	6769232	412	*	366	9.1147	36.6429	34.2596	MYC2_1360	AT1G19550	6767451	6767983	-	upstream	-838	838	Upstream
MYC2_1362.AT1G19570	chr1	6774281	6774898	618	*	809	15.4121	80.9461	78.1667	MYC2_1362	AT1G19570	6773302	6774528	-	overlapStart	247	247	Upstream
MYC2_1362.AT1G19580	chr1	6774281	6774898	618	*	809	15.4121	80.9461	78.1667	MYC2_1362	AT1G19580	6774760	6777456	+	overlapStart	-479	138	Upstream
MYC2_1364.AT1G19610	chr1	6782627	6782892	266	*	53	3.23511	5.38355	3.80647	MYC2_1364	AT1G19610	6781483	6782039	-	upstream	-588	588	Upstream
MYC2_1365.AT1G19630	chr1	6788421	6788856	436	*	81	4.07615	8.15838	6.39981	MYC2_1365	AT1G19630	6785427	6787967	-	upstream	-454	454	Upstream
MYC2_1369.AT1G19650	chr1	6799631	6800161	531	*	88	4.27996	8.89315	7.10093	MYC2_1369	AT1G19650	6796202	6799764	-	overlapStart	133	133	Upstream
MYC2_1370.AT1G19660	chr1	6802645	6804226	1582	*	1722	25.1459	172.241	168.131	MYC2_1370	AT1G19660	6799981	6802685	-	overlapStart	40	40	Upstream
MYC2_1371.AT1G19670	chr1	6804502	6805523	1022	*	1480	24.8812	148.042	144.205	MYC2_1371	AT1G19670	6803611	6805044	-	overlapStart	542	479	Upstream
MYC2_1371.AT1G19680	chr1	6804502	6805523	1022	*	1480	24.8812	148.042	144.205	MYC2_1371	AT1G19680	6805457	6807862	+	overlapStart	-955	66	Upstream
MYC2_1372.AT1G19710	chr1	6813882	6814440	559	*	177	6.37054	17.7651	15.6955	MYC2_1372	AT1G19710	6814793	6816876	+	upstream	-911	353	Upstream
MYC2_1373.AT1G19730	chr1	6824099	6824425	327	*	27	2.2102	2.78378	1.4263	MYC2_1373	AT1G19730	6822864	6824071	-	upstream	-28	28	Upstream
MYC2_1373.AT1G19740	chr1	6824099	6824425	327	*	27	2.2102	2.78378	1.4263	MYC2_1373	AT1G19740	6824322	6825459	+	overlapStart	-223	103	Upstream
MYC2_1374.AT1G19770	chr1	6831436	6831694	259	*	80	3.80512	8.07662	6.34299	MYC2_1374	AT1G19770	6832347	6833837	+	upstream	-911	653	Upstream
MYC2_1375.AT1G19770	chr1	6831919	6832538	620	*	45	2.84117	4.5455	3.02165	MYC2_1375	AT1G19770	6832347	6833837	+	overlapStart	-428	191	Upstream
MYC2_1378.AT1G19835	chr1	6861394	6863317	1924	*	136	5.50281	13.6902	11.7224	MYC2_1378	AT1G19835	6855952	6860443	-	upstream	-951	951	Upstream
MYC2_1388.AT1G19860	chr1	6894727	6895017	291	*	36	2.58964	3.69031	2.22447	MYC2_1388	AT1G19860	6891429	6894736	-	overlapStart	9	9	Upstream
MYC2_1389.AT1G19870	chr1	6898672	6898914	243	*	60	3.34503	6.04849	4.42795	MYC2_1389	AT1G19870	6895015	6898725	-	overlapStart	53	53	Upstream
MYC2_1390.AT1G19870	chr1	6899080	6899306	227	*	48	2.99285	4.87294	3.30931	MYC2_1390	AT1G19870	6895015	6898725	-	upstream	-355	355	Upstream
MYC2_1391.AT1G19870	chr1	6899468	6899926	459	*	90	3.7953	9.09441	7.2992	MYC2_1391	AT1G19870	6895015	6898725	-	upstream	-743	743	Upstream
MYC2_1393.AT1G19880	chr1	6903825	6904291	467	*	26	2.24189	2.62363	1.2736	MYC2_1393	AT1G19880	6900415	6904069	-	overlapStart	244	222	Upstream
MYC2_1393.AT1G19890	chr1	6903825	6904291	467	*	26	2.24189	2.62363	1.2736	MYC2_1393	AT1G19890	6905034	6906018	+	upstream	-1209	743	Upstream
MYC2_1396.AT1G19940	chr1	6920516	6921144	629	*	88	4.27996	8.89315	7.10093	MYC2_1396	AT1G19940	6918191	6920377	-	upstream	-139	139	Upstream
MYC2_1397.AT1G19960	chr1	6927523	6927884	362	*	71	3.73884	7.15378	5.4603	MYC2_1397	AT1G19960	6928039	6928463	+	upstream	-516	155	Upstream
MYC2_1399.AT1G20010	chr1	6940619	6941839	1221	*	145	5.70662	14.5479	12.5546	MYC2_1399	AT1G20010	6937795	6940582	-	upstream	-37	37	Upstream
MYC2_1399.AT1G20015	chr1	6940619	6941839	1221	*	145	5.70662	14.5479	12.5546	MYC2_1399	AT1G20015	6941285	6941373	+	includeFeature	-666	466	Upstream
MYC2_1399.AT1G20020	chr1	6940619	6941839	1221	*	145	5.70662	14.5479	12.5546	MYC2_1399	AT1G20020	6942717	6945018	+	upstream	-2098	878	Upstream
MYC2_1400.AT1G20020	chr1	6942157	6942913	757	*	410	11.0056	41.0709	38.6397	MYC2_1400	AT1G20020	6942717	6945018	+	overlapStart	-560	196	Upstream
MYC2_1401.AT1G20030	chr1	6945424	6945833	410	*	33	2.37856	3.37965	1.95911	MYC2_1401	AT1G20030	6945425	6947344	+	overlapStart	-1	1	Upstream
MYC2_1403.AT1G20040	chr1	6947820	6949171	1352	*	1014	20.0858	101.469	98.424	MYC2_1403	AT1G20040	6948860	6948943	-	includeFeature	1123	228	Upstream
MYC2_1403.AT1G20050	chr1	6947820	6949171	1352	*	1014	20.0858	101.469	98.424	MYC2_1403	AT1G20050	6949043	6950319	+	overlapStart	-1223	128	Upstream
MYC2_1404.AT1G20070	chr1	6959447	6959706	260	*	42	2.80169	4.2895	2.77186	MYC2_1404	AT1G20070	6958010	6959123	-	upstream	-324	324	Upstream
MYC2_1406.AT1G20090	chr1	6965751	6966087	337	*	78	3.93562	7.84904	6.11936	MYC2_1406	AT1G20090	6966922	6968933	+	upstream	-1171	835	Upstream
MYC2_1407.AT1G20090	chr1	6966507	6967091	585	*	504	12.6132	50.4179	47.9071	MYC2_1407	AT1G20090	6966922	6968933	+	overlapStart	-415	169	Upstream
MYC2_1411.AT1G20100	chr1	6970759	6971399	641	*	70	3.292	7.01445	5.32365	MYC2_1411	AT1G20100	6969107	6970956	-	overlapStart	197	197	Upstream
MYC2_1411.AT1G20110	chr1	6970759	6971399	641	*	70	3.292	7.01445	5.32365	MYC2_1411	AT1G20110	6971485	6974835	+	upstream	-726	86	Upstream
MYC2_1412.AT1G20170	chr1	6995187	6995476	290	*	42	2.85331	4.2239	2.70893	MYC2_1412	AT1G20170	6995282	6995353	-	includeFeature	166	95	Upstream
MYC2_1412.AT1G20180	chr1	6995187	6995476	290	*	42	2.85331	4.2239	2.70893	MYC2_1412	AT1G20180	6996210	6997943	+	upstream	-1023	734	Upstream
MYC2_1413.AT1G20170	chr1	6996053	6996244	192	*	48	3.05712	4.81704	3.25478	MYC2_1413	AT1G20170	6995282	6995353	-	upstream	-700	700	Upstream
MYC2_1413.AT1G20180	chr1	6996053	6996244	192	*	48	3.05712	4.81704	3.25478	MYC2_1413	AT1G20180	6996210	6997943	+	overlapStart	-157	34	Upstream
MYC2_1415.AT1G20200	chr1	7004353	7004719	367	*	55	3.20089	5.51866	3.91129	MYC2_1415	AT1G20200	7001201	7004418	-	overlapStart	65	65	Upstream
MYC2_1415.AT1G20210	chr1	7004353	7004719	367	*	55	3.20089	5.51866	3.91129	MYC2_1415	AT1G20210	7004514	7004585	+	includeFeature	-161	134	Upstream
MYC2_1416.AT1G20250	chr1	7016242	7016796	555	*	269	8.35612	26.9151	24.6609	MYC2_1416	AT1G20250	7016516	7016588	+	includeFeature	-274	208	Upstream
MYC2_1416.AT1G20260	chr1	7016242	7016796	555	*	269	8.35612	26.9151	24.6609	MYC2_1416	AT1G20260	7016693	7020590	+	overlapStart	-451	103	Upstream
MYC2_1419.AT1G20310	chr1	7031467	7032276	810	*	457	11.8208	45.7138	43.2382	MYC2_1419	AT1G20310	7032290	7033208	+	upstream	-823	14	Upstream
MYC2_1422.AT1G20330	chr1	7039958	7040330	373	*	36	2.6495	3.65933	2.19401	MYC2_1422	AT1G20330	7038688	7040159	-	overlapStart	201	171	Upstream
MYC2_1423.AT1G20330	chr1	7040530	7040933	404	*	136	5.50281	13.6902	11.7224	MYC2_1423	AT1G20330	7038688	7040159	-	upstream	-371	371	Upstream
MYC2_1425.AT1G20340	chr1	7043404	7043678	275	*	67	3.44429	6.72544	5.06483	MYC2_1425	AT1G20340	7042429	7043363	-	upstream	-41	41	Upstream
MYC2_1425.AT1G20350	chr1	7043404	7043678	275	*	67	3.44429	6.72544	5.06483	MYC2_1425	AT1G20350	7043713	7044592	+	upstream	-309	35	Upstream
MYC2_1426.AT1G20370	chr1	7054156	7054401	246	*	31	2.44569	3.12521	1.71436	MYC2_1426	AT1G20370	7051577	7053641	-	upstream	-515	515	Upstream
MYC2_1427.AT1G20410	chr1	7082427	7082820	394	*	441	10.2747	44.1284	41.6717	MYC2_1427	AT1G20410	7078898	7082547	-	overlapStart	120	120	Upstream
MYC2_1427.AT1G20420	chr1	7082427	7082820	394	*	441	10.2747	44.1284	41.6717	MYC2_1427	AT1G20420	7082668	7082739	+	includeFeature	-241	81	Upstream
MYC2_1428.AT1G20430	chr1	7084175	7084743	569	*	34	2.48843	3.4812	2.05653	MYC2_1428	AT1G20430	7083196	7083835	-	upstream	-340	340	Upstream
MYC2_1429.AT1G20440	chr1	7085693	7086285	593	*	26	2.24189	2.62363	1.2736	MYC2_1429	AT1G20440	7084409	7085772	-	overlapStart	79	79	Upstream
MYC2_1430.AT1G20440	chr1	7086530	7086855	326	*	154	5.91042	15.4207	13.4024	MYC2_1430	AT1G20440	7084409	7085772	-	upstream	-758	758	Upstream
MYC2_1434.AT1G20450	chr1	7089757	7090342	586	*	248	7.9485	24.8816	22.6611	MYC2_1434	AT1G20450	7088003	7089606	-	upstream	-151	151	Upstream
MYC2_1435.AT1G20450	chr1	7090566	7090871	306	*	42	2.85331	4.2239	2.70893	MYC2_1435	AT1G20450	7088003	7089606	-	upstream	-960	960	Upstream
MYC2_1435.AT1G20460	chr1	7090566	7090871	306	*	42	2.85331	4.2239	2.70893	MYC2_1435	AT1G20460	7091361	7092993	+	upstream	-795	490	Upstream
MYC2_1436.AT1G20490	chr1	7099771	7100048	278	*	186	6.55981	18.6573	16.5664	MYC2_1436	AT1G20490	7097293	7099695	-	upstream	-76	76	Upstream
MYC2_1437.AT1G20500	chr1	7103395	7103697	303	*	103	4.64363	10.3224	8.48799	MYC2_1437	AT1G20500	7100502	7102915	-	upstream	-480	480	Upstream
MYC2_1438.AT1G20510	chr1	7105753	7106263	511	*	1489	22.3457	148.906	145.064	MYC2_1438	AT1G20510	7103454	7105881	-	overlapStart	128	128	Upstream
MYC2_1438.AT1G20515	chr1	7105753	7106263	511	*	1489	22.3457	148.906	145.064	MYC2_1438	AT1G20515	7106165	7107977	+	overlapStart	-412	98	Upstream
MYC2_1439.AT1G20560	chr1	7121804	7122003	200	*	59	3.3979	5.94137	4.3239	MYC2_1439	AT1G20560	7119676	7121817	-	overlapStart	13	13	Upstream
MYC2_1442.AT1G20620	chr1	7141828	7144159	2332	*	615	14.4703	61.5845	58.978	MYC2_1442	AT1G20620	7143067	7146540	+	overlapStart	-1239	1092	Upstream
MYC2_1443.AT1G20630	chr1	7146434	7146658	225	*	45	2.92353	4.54314	3.01935	MYC2_1443	AT1G20630	7146636	7149977	+	overlapStart	-202	22	Upstream
MYC2_1447.AT1G20640	chr1	7154337	7154638	302	*	26	2.24189	2.62363	1.2736	MYC2_1447	AT1G20640	7154410	7158218	+	overlapStart	-73	73	Upstream
MYC2_1448.AT1G20650	chr1	7160307	7161273	967	*	65	3.58521	6.57342	4.91651	MYC2_1448	AT1G20650	7158244	7160526	-	overlapStart	219	219	Upstream
MYC2_1449.AT1G20657	chr1	7163656	7163903	248	*	48	3.05712	4.81704	3.25478	MYC2_1449	AT1G20657	7161890	7163076	-	upstream	-580	580	Upstream
MYC2_1451.AT1G20670	chr1	7167879	7168217	339	*	97	3.94128	9.76271	7.93656	MYC2_1451	AT1G20670	7164190	7168021	-	overlapStart	142	142	Upstream
MYC2_1452.AT1G20691	chr1	7176469	7176767	299	*	24	2.00383	2.44861	1.14881	MYC2_1452	AT1G20691	7174584	7176453	-	upstream	-16	16	Upstream
MYC2_1452.AT1G20693	chr1	7176469	7176767	299	*	24	2.00383	2.44861	1.14881	MYC2_1452	AT1G20693	7176775	7178820	+	upstream	-306	8	Upstream
MYC2_1454.AT1G20696	chr1	7178552	7179676	1125	*	166	6.10021	16.6924	14.6469	MYC2_1454	AT1G20696	7179452	7181499	+	overlapStart	-900	224	Upstream
MYC2_1456.AT1G20770	chr1	7216820	7217101	282	*	48	2.8425	4.89748	3.33353	MYC2_1456	AT1G20770	7215015	7216741	-	upstream	-79	79	Upstream
MYC2_1456.AT1G20780	chr1	7216820	7217101	282	*	48	2.8425	4.89748	3.33353	MYC2_1456	AT1G20780	7217128	7220784	+	upstream	-308	27	Upstream
MYC2_1458.AT1G20823	chr1	7238372	7238746	375	*	81	4.07615	8.15838	6.39981	MYC2_1458	AT1G20823	7238800	7239669	+	upstream	-428	54	Upstream
MYC2_1460.AT1G20820	chr1	7242703	7242930	228	*	46	2.55749	4.65359	3.12621	MYC2_1460	AT1G20820	7242761	7242832	-	includeFeature	129	58	Upstream
MYC2_1460.AT1G20830	chr1	7242703	7242930	228	*	46	2.55749	4.65359	3.12621	MYC2_1460	AT1G20830	7242920	7244904	+	overlapStart	-217	10	Upstream
MYC2_1461.AT1G20840	chr1	7248075	7248946	872	*	120	5.09519	12.0221	10.1079	MYC2_1461	AT1G20840	7244939	7248143	-	overlapStart	68	68	Upstream
MYC2_1462.AT1G20850	chr1	7250136	7251400	1265	*	343	9.78277	34.3482	31.9919	MYC2_1462	AT1G20850	7252174	7253731	+	upstream	-2038	774	Upstream
MYC2_1463.AT1G20870	chr1	7261540	7261747	208	*	30	2.43013	3.09571	1.71436	MYC2_1463	AT1G20870	7259102	7260775	-	upstream	-765	765	Upstream
MYC2_1464.AT1G20890	chr1	7267412	7268336	925	*	154	5.91042	15.4207	13.4024	MYC2_1464	AT1G20890	7265823	7267323	-	upstream	-89	89	Upstream
MYC2_1467.AT1G20900	chr1	7271818	7272135	318	*	36	2.6495	3.65933	2.19401	MYC2_1467	AT1G20900	7272556	7274072	+	upstream	-738	421	Upstream
MYC2_1468.AT1G20900	chr1	7272480	7272759	280	*	54	3.26092	5.43708	3.83145	MYC2_1468	AT1G20900	7272556	7274072	+	overlapStart	-76	76	Upstream
MYC2_1469.AT1G20950	chr1	7301369	7301752	384	*	45	2.93787	4.57274	3.04782	MYC2_1469	AT1G20950	7297239	7301415	-	overlapStart	46	46	Upstream
MYC2_1470.AT1G20960	chr1	7310428	7310637	210	*	36	2.64606	3.65263	2.19401	MYC2_1470	AT1G20960	7301748	7310250	-	upstream	-178	178	Upstream
MYC2_1471.AT1G20960	chr1	7310953	7311313	361	*	40	2.7885	4.09423	2.61505	MYC2_1471	AT1G20960	7301748	7310250	-	upstream	-703	703	Upstream
MYC2_1472.AT1G20967	chr1	7312014	7312937	924	*	706	14.2417	70.6592	67.9745	MYC2_1472	AT1G20967	7313081	7313227	+	upstream	-1067	144	Upstream
MYC2_1473.AT1G20970	chr1	7313557	7313798	242	*	29	2.36188	2.9658	1.59956	MYC2_1473	AT1G20970	7313946	7319574	+	upstream	-389	148	Upstream
MYC2_1479.AT1G20980	chr1	7324301	7324730	430	*	96	4.48377	9.64772	7.82338	MYC2_1479	AT1G20980	7324588	7329385	+	overlapStart	-287	142	Upstream
MYC2_1482.AT1G21000	chr1	7334825	7337815	2991	*	1695	27.195	169.521	165.439	MYC2_1482	AT1G21000	7337728	7339452	+	overlapStart	-2903	87	Upstream
MYC2_1495.AT1G21050	chr1	7366012	7366829	818	*	217	7.279	21.7747	19.621	MYC2_1495	AT1G21050	7366775	7367678	+	overlapStart	-763	54	Upstream
MYC2_1498.AT1G21060	chr1	7370454	7370926	473	*	771	16.916	77.1529	74.4081	MYC2_1498	AT1G21060	7371666	7374110	+	upstream	-1212	740	Upstream
MYC2_1499.AT1G21060	chr1	7371035	7371850	816	*	128	5.299	12.8481	10.9066	MYC2_1499	AT1G21060	7371666	7374110	+	overlapStart	-631	184	Upstream
MYC2_1500.AT1G21070	chr1	7377995	7378597	603	*	89	4.19372	8.9916	7.19879	MYC2_1500	AT1G21070	7375869	7378147	-	overlapStart	152	152	Upstream
MYC2_1502.AT1G21100	chr1	7388510	7389357	848	*	128	5.299	12.8481	10.9066	MYC2_1502	AT1G21100	7386839	7388428	-	upstream	-82	82	Upstream
MYC2_1504.AT1G21110	chr1	7391619	7391803	185	*	26	2.24189	2.62363	1.2736	MYC2_1504	AT1G21110	7389981	7391553	-	upstream	-66	66	Upstream
MYC2_1505.AT1G21110	chr1	7391934	7392118	185	*	36	2.6495	3.65933	2.19401	MYC2_1505	AT1G21110	7389981	7391553	-	upstream	-381	381	Upstream
MYC2_1506.AT1G21120	chr1	7396805	7397292	488	*	37	2.61491	3.74215	2.27406	MYC2_1506	AT1G21120	7395228	7396773	-	upstream	-32	32	Upstream
MYC2_1507.AT1G21130	chr1	7400688	7400940	253	*	31	2.44569	3.12521	1.71436	MYC2_1507	AT1G21130	7399062	7400605	-	upstream	-83	83	Upstream
MYC2_1508.AT1G21130	chr1	7401071	7401463	393	*	92	4.18946	9.27179	7.47433	MYC2_1508	AT1G21130	7399062	7400605	-	upstream	-466	466	Upstream
MYC2_1510.AT1G21250	chr1	7439097	7439325	229	*	40	2.66618	4.00304	2.52665	MYC2_1510	AT1G21250	7439266	7442113	+	overlapStart	-169	59	Upstream
MYC2_1511.AT1G21270	chr1	7444506	7444972	467	*	147	5.46451	14.7388	12.7433	MYC2_1511	AT1G21270	7444931	7447549	+	overlapStart	-425	41	Upstream
MYC2_1512.AT1G21300	chr1	7452489	7452695	207	*	48	3.05712	4.81704	3.25478	MYC2_1512	AT1G21300	7451150	7451707	-	upstream	-782	782	Upstream
MYC2_1513.AT1G21310	chr1	7455745	7455929	185	*	31	2.44569	3.12521	1.71436	MYC2_1513	AT1G21310	7453236	7455009	-	upstream	-736	736	Upstream
MYC2_1518.AT1G21326	chr1	7470139	7470501	363	*	120	5.09519	12.0221	10.1079	MYC2_1518	AT1G21326	7469002	7469721	-	upstream	-418	418	Upstream
MYC2_1520.AT1G21370	chr1	7483495	7483689	195	*	25	2.22414	2.59108	1.2736	MYC2_1520	AT1G21370	7483781	7485666	+	upstream	-286	92	Upstream
MYC2_1521.AT1G21380	chr1	7488675	7489104	430	*	185	6.34791	18.5752	16.4851	MYC2_1521	AT1G21380	7485636	7488713	-	overlapStart	38	38	Upstream
MYC2_1522.AT1G21390	chr1	7491190	7491654	465	*	38	2.6831	3.88128	2.40855	MYC2_1522	AT1G21390	7489151	7490737	-	upstream	-453	453	Upstream
MYC2_1522.AT1G21395	chr1	7491190	7491654	465	*	38	2.6831	3.88128	2.40855	MYC2_1522	AT1G21395	7491965	7492339	+	upstream	-775	311	Upstream
MYC2_1523.AT1G21400	chr1	7493345	7493941	597	*	120	5.09519	12.0221	10.1079	MYC2_1523	AT1G21400	7493426	7496710	+	overlapStart	-81	81	Upstream
MYC2_1525.AT1G21410	chr1	7496525	7497288	764	*	468	12.0029	46.8389	44.3591	MYC2_1525	AT1G21410	7497141	7499579	+	overlapStart	-616	147	Upstream
MYC2_1526.AT1G21450	chr1	7508202	7508417	216	*	36	2.6495	3.65933	2.19401	MYC2_1526	AT1G21450	7508969	7511801	+	upstream	-767	552	Upstream
MYC2_1528.AT1G21510	chr1	7533173	7534293	1121	*	145	5.70662	14.5479	12.5546	MYC2_1528	AT1G21510	7531312	7532629	-	upstream	-544	544	Upstream
MYC2_1529.AT1G21520	chr1	7534511	7534940	430	*	34	2.43101	3.49488	2.06935	MYC2_1529	AT1G21520	7534154	7534789	-	overlapStart	278	151	Upstream
MYC2_1530.AT1G21520	chr1	7535365	7535760	396	*	42	2.85331	4.2239	2.70893	MYC2_1530	AT1G21520	7534154	7534789	-	upstream	-576	576	Upstream
MYC2_1533.AT1G21525	chr1	7538546	7538799	254	*	17	1.83427	1.72792	0.517312	MYC2_1533	AT1G21525	7537087	7537649	-	upstream	-897	897	Upstream
MYC2_1535.AT1G21528	chr1	7543343	7543527	185	*	31	2.44569	3.12521	1.71436	MYC2_1535	AT1G21528	7542830	7543077	-	upstream	-266	266	Upstream
MYC2_1538.AT1G21580	chr1	7565710	7566426	717	*	81	3.82333	8.12048	6.38464	MYC2_1538	AT1G21580	7557262	7565803	-	overlapStart	93	93	Upstream
MYC2_1539.AT1G21590	chr1	7570160	7571245	1086	*	390	9.98856	39.0643	36.6555	MYC2_1539	AT1G21590	7566232	7569902	-	upstream	-258	258	Upstream
MYC2_1540.AT1G21640	chr1	7588404	7588721	318	*	147	5.18616	14.7596	12.7638	MYC2_1540	AT1G21640	7588414	7592890	+	overlapStart	-10	10	Upstream
MYC2_1541.AT1G21670	chr1	7609478	7609796	319	*	39	2.70096	3.91755	2.44408	MYC2_1541	AT1G21670	7610398	7612682	+	upstream	-920	602	Upstream
MYC2_1542.AT1G21680	chr1	7612616	7612929	314	*	49	2.95311	4.97218	3.40639	MYC2_1542	AT1G21680	7613005	7615339	+	upstream	-389	76	Upstream
MYC2_1543.AT1G21730	chr1	7629467	7629724	258	*	62	3.43615	6.24945	4.59968	MYC2_1543	AT1G21730	7630107	7636594	+	upstream	-640	383	Upstream
MYC2_1544.AT1G21730	chr1	7629891	7630228	338	*	56	3.25302	5.63152	4.02208	MYC2_1544	AT1G21730	7630107	7636594	+	overlapStart	-216	121	Upstream
MYC2_1546.AT1G21738	chr1	7641094	7641429	336	*	365	8.87996	36.5255	34.1508	MYC2_1546	AT1G21738	7641002	7641094	-	overlapStart	0	0	Upstream
MYC2_1546.AT1G21740	chr1	7641094	7641429	336	*	365	8.87996	36.5255	34.1508	MYC2_1546	AT1G21740	7641580	7645078	+	upstream	-486	151	Upstream
MYC2_1547.AT1G21810	chr1	7659185	7659369	185	*	21	2.03808	2.15698	0.872271	MYC2_1547	AT1G21810	7656399	7658634	-	upstream	-551	551	Upstream
MYC2_1548.AT1G21810	chr1	7659502	7660133	632	*	269	8.35612	26.9151	24.6609	MYC2_1548	AT1G21810	7656399	7658634	-	upstream	-868	868	Upstream
MYC2_1551.AT1G21830	chr1	7662554	7662981	428	*	48	3.05712	4.81704	3.25478	MYC2_1551	AT1G21830	7661118	7662608	-	overlapStart	54	54	Upstream
MYC2_1552.AT1G21830	chr1	7663199	7664540	1342	*	628	14.6742	62.8503	60.2333	MYC2_1552	AT1G21830	7661118	7662608	-	upstream	-591	591	Upstream
MYC2_1553.AT1G21835	chr1	7664770	7665525	756	*	628	14.6742	62.8503	60.2333	MYC2_1553	AT1G21835	7665664	7665936	+	upstream	-894	139	Upstream
MYC2_1553.AT1G21840	chr1	7664770	7665525	756	*	628	14.6742	62.8503	60.2333	MYC2_1553	AT1G21840	7666460	7667758	+	upstream	-1690	935	Upstream
MYC2_1554.AT1G21880	chr1	7680214	7680488	275	*	27	2.24135	2.73431	1.37874	MYC2_1554	AT1G21880	7680481	7682641	+	overlapStart	-267	7	Upstream
MYC2_1556.AT1G21900	chr1	7692378	7692562	185	*	38	2.6831	3.88128	2.40855	MYC2_1556	AT1G21900	7690802	7692438	-	overlapStart	60	60	Upstream
MYC2_1557.AT1G21900	chr1	7693383	7693806	424	*	26	2.24189	2.62363	1.2736	MYC2_1557	AT1G21900	7690802	7692438	-	upstream	-945	945	Upstream
MYC2_1559.AT1G21910	chr1	7695272	7696587	1316	*	154	5.91042	15.4207	13.4024	MYC2_1559	AT1G21910	7696536	7697699	+	overlapStart	-1264	51	Upstream
MYC2_1566.AT1G21920	chr1	7706027	7706686	660	*	60	3.46473	6.08252	4.43613	MYC2_1566	AT1G21920	7704255	7706140	-	overlapStart	113	113	Upstream
MYC2_1568.AT1G21973	chr1	7732104	7733481	1378	*	145	5.70662	14.5479	12.5546	MYC2_1568	AT1G21973	7730911	7731144	-	upstream	-960	960	Upstream
MYC2_1568.AT1G21975	chr1	7732104	7733481	1378	*	145	5.70662	14.5479	12.5546	MYC2_1568	AT1G21975	7732280	7732468	+	includeFeature	-176	176	Upstream
MYC2_1569.AT1G21980	chr1	7733676	7733937	262	*	36	2.6495	3.65933	2.19401	MYC2_1569	AT1G21980	7734739	7738661	+	upstream	-1063	802	Upstream
MYC2_1570.AT1G21980	chr1	7734346	7734728	383	*	60	3.46473	6.08252	4.43613	MYC2_1570	AT1G21980	7734739	7738661	+	upstream	-393	11	Upstream
MYC2_1573.AT1G22000	chr1	7743175	7743381	207	*	21	2.03808	2.15698	0.872271	MYC2_1573	AT1G22000	7744189	7747785	+	upstream	-1014	808	Upstream
MYC2_1575.AT1G22060	chr1	7781489	7781717	229	*	36	2.6495	3.65933	2.19401	MYC2_1575	AT1G22060	7773063	7781499	-	overlapStart	10	10	Upstream
MYC2_1576.AT1G22060	chr1	7782197	7782717	521	*	289	8.76373	28.9902	26.7052	MYC2_1576	AT1G22060	7773063	7781499	-	upstream	-698	698	Upstream
MYC2_1577.AT1G22070	chr1	7788143	7788607	465	*	81	4.07615	8.15838	6.39981	MYC2_1577	AT1G22070	7789348	7792114	+	upstream	-1205	741	Upstream
MYC2_1578.AT1G22070	chr1	7789281	7789684	404	*	112	4.89139	11.2129	9.32726	MYC2_1578	AT1G22070	7789348	7792114	+	overlapStart	-67	67	Upstream
MYC2_1579.AT1G22100	chr1	7800716	7800929	214	*	54	3.26092	5.43708	3.83145	MYC2_1579	AT1G22100	7798023	7800228	-	upstream	-488	488	Upstream
MYC2_1581.AT1G22160	chr1	7822942	7823147	206	*	26	2.24189	2.62363	1.2736	MYC2_1581	AT1G22160	7823149	7823971	+	upstream	-207	2	Upstream
MYC2_1582.AT1G22170	chr1	7826116	7826479	364	*	21	2.03808	2.15698	0.872271	MYC2_1582	AT1G22170	7826289	7828326	+	overlapStart	-173	173	Upstream
MYC2_1583.AT1G22180	chr1	7830256	7830942	687	*	107	4.55376	10.7529	8.89262	MYC2_1583	AT1G22180	7828326	7830392	-	overlapStart	136	136	Upstream
MYC2_1585.AT1G22190	chr1	7834040	7835514	1475	*	258	8.15231	25.893	23.6554	MYC2_1585	AT1G22190	7835782	7837288	+	upstream	-1742	268	Upstream
MYC2_1589.AT1G22220	chr1	7845489	7845755	267	*	36	2.6495	3.65933	2.19401	MYC2_1589	AT1G22220	7846602	7847802	+	upstream	-1113	847	Upstream
MYC2_1592.AT1G22280	chr1	7872618	7873721	1104	*	289	8.76373	28.9902	26.7052	MYC2_1592	AT1G22280	7873867	7875878	+	upstream	-1249	146	Upstream
MYC2_1594.AT1G22310	chr1	7884017	7884788	772	*	52	2.98299	5.22683	3.65424	MYC2_1594	AT1G22310	7881537	7883742	-	upstream	-275	275	Upstream
MYC2_1594.AT1G22320	chr1	7884017	7884788	772	*	52	2.98299	5.22683	3.65424	MYC2_1594	AT1G22320	7884417	7884454	-	includeFeature	437	334	Upstream
MYC2_1595.AT1G22330	chr1	7885593	7885950	358	*	26	2.24189	2.62363	1.2736	MYC2_1595	AT1G22330	7886542	7889534	+	upstream	-949	592	Upstream
MYC2_1596.AT1G22330	chr1	7886381	7886628	248	*	81	4.07615	8.15838	6.39981	MYC2_1596	AT1G22330	7886542	7889534	+	overlapStart	-161	86	Upstream
MYC2_1599.AT1G22340	chr1	7892125	7892356	232	*	60	3.46473	6.08252	4.43613	MYC2_1599	AT1G22340	7890464	7892090	-	upstream	-35	35	Upstream
MYC2_1600.AT1G22350	chr1	7894404	7894705	302	*	96	4.48377	9.64772	7.82338	MYC2_1600	AT1G22350	7892878	7894498	-	overlapStart	94	94	Upstream
MYC2_1602.AT1G22360	chr1	7897545	7897894	350	*	325	9.08921	32.5994	30.2682	MYC2_1602	AT1G22360	7894858	7897591	-	overlapStart	46	46	Upstream
MYC2_1603.AT1G22370	chr1	7899963	7900348	386	*	129	5.17454	12.9209	10.9783	MYC2_1603	AT1G22370	7898013	7899879	-	upstream	-84	84	Upstream
MYC2_1604.AT1G22380	chr1	7902293	7902608	316	*	78	3.91716	7.80803	6.07935	MYC2_1604	AT1G22380	7900387	7902332	-	overlapStart	39	39	Upstream
MYC2_1605.AT1G22380	chr1	7902889	7903435	547	*	104	4.68758	10.4212	8.56585	MYC2_1605	AT1G22380	7900387	7902332	-	upstream	-557	557	Upstream
MYC2_1608.AT1G22400	chr1	7906681	7908067	1387	*	410	11.0056	41.0709	38.6397	MYC2_1608	AT1G22400	7903660	7906673	-	upstream	-8	8	Upstream
MYC2_1610.AT1G22403	chr1	7909956	7910283	328	*	104	4.68758	10.4212	8.56585	MYC2_1610	AT1G22403	7908568	7909708	-	upstream	-248	248	Upstream
MYC2_1611.AT1G22403	chr1	7910511	7910912	402	*	112	4.89139	11.2129	9.32726	MYC2_1611	AT1G22403	7908568	7909708	-	upstream	-803	803	Upstream
MYC2_1613.AT1G22430	chr1	7918949	7919278	330	*	112	4.89139	11.2129	9.32726	MYC2_1613	AT1G22430	7919144	7921832	+	overlapStart	-195	134	Upstream
MYC2_1617.AT1G22480	chr1	7935932	7936412	481	*	300	8.96754	30.0428	27.7424	MYC2_1617	AT1G22480	7934162	7935382	-	upstream	-550	550	Upstream
MYC2_1622.AT1G22500	chr1	7947853	7948989	1137	*	181	6.52185	18.1248	16.038	MYC2_1622	AT1G22500	7949476	7950900	+	upstream	-1623	487	Upstream
MYC2_1623.AT1G22500	chr1	7949253	7949521	269	*	48	3.05712	4.81704	3.25478	MYC2_1623	AT1G22500	7949476	7950900	+	overlapStart	-223	45	Upstream
MYC2_1624.AT1G22510	chr1	7952729	7953001	273	*	30	2.40453	3.04709	1.67695	MYC2_1624	AT1G22510	7950818	7952832	-	overlapStart	103	103	Upstream
MYC2_1625.AT1G22520	chr1	7954381	7954811	431	*	117	4.8317	11.7508	9.85834	MYC2_1625	AT1G22520	7952996	7954418	-	overlapStart	37	37	Upstream
MYC2_1626.AT1G22520	chr1	7955369	7955570	202	*	31	2.44569	3.12521	1.71436	MYC2_1626	AT1G22520	7952996	7954418	-	upstream	-951	951	Upstream
MYC2_1627.AT1G22530	chr1	7958386	7958659	274	*	120	5.09519	12.0221	10.1079	MYC2_1627	AT1G22530	7955493	7958442	-	overlapStart	56	56	Upstream
MYC2_1628.AT1G22550	chr1	7968603	7968926	324	*	55	3.20693	5.53179	3.92423	MYC2_1628	AT1G22550	7966533	7968641	-	overlapStart	38	38	Upstream
MYC2_1630.AT1G22570	chr1	7978556	7980342	1787	*	745	16.5084	74.5031	71.7827	MYC2_1630	AT1G22570	7976620	7978573	-	overlapStart	17	17	Upstream
MYC2_1630.AT1G22580	chr1	7978556	7980342	1787	*	745	16.5084	74.5031	71.7827	MYC2_1630	AT1G22580	7980709	7981263	+	upstream	-2153	367	Upstream
MYC2_1631.AT1G22600	chr1	7990047	7990434	388	*	128	5.299	12.8481	10.9066	MYC2_1631	AT1G22600	7987141	7989217	-	upstream	-830	830	Upstream
MYC2_1635.AT1G22610	chr1	7993719	7994361	643	*	145	5.70662	14.5479	12.5546	MYC2_1635	AT1G22610	7994291	7997588	+	overlapStart	-572	70	Upstream
MYC2_1636.AT1G22640	chr1	8005180	8005558	379	*	321	9.37516	32.1769	29.8476	MYC2_1636	AT1G22640	8006195	8007428	+	upstream	-1015	637	Upstream
MYC2_1637.AT1G22640	chr1	8005837	8006161	325	*	54	3.26092	5.43708	3.83145	MYC2_1637	AT1G22640	8006195	8007428	+	upstream	-358	34	Upstream
MYC2_1640.AT1G22650	chr1	8015804	8016424	621	*	219	7.33708	21.9141	19.747	MYC2_1640	AT1G22650	8013382	8015991	-	overlapStart	187	187	Upstream
MYC2_1640.AT1G22651	chr1	8015804	8016424	621	*	219	7.33708	21.9141	19.747	MYC2_1640	AT1G22651	8016126	8016287	+	includeFeature	-322	137	Upstream
MYC2_1640.AT1G22660	chr1	8015804	8016424	621	*	219	7.33708	21.9141	19.747	MYC2_1640	AT1G22660	8017397	8021712	+	upstream	-1593	973	Upstream
MYC2_1641.AT1G22650	chr1	8016596	8017278	683	*	483	12.0657	48.3457	45.8482	MYC2_1641	AT1G22650	8013382	8015991	-	upstream	-605	605	Upstream
MYC2_1641.AT1G22660	chr1	8016596	8017278	683	*	483	12.0657	48.3457	45.8482	MYC2_1641	AT1G22660	8017397	8021712	+	upstream	-801	119	Upstream
MYC2_1642.AT1G22680	chr1	8026395	8026723	329	*	136	5.50281	13.6902	11.7224	MYC2_1642	AT1G22680	8024967	8026356	-	upstream	-39	39	Upstream
MYC2_1642.AT1G22690	chr1	8026395	8026723	329	*	136	5.50281	13.6902	11.7224	MYC2_1642	AT1G22690	8027294	8028168	+	upstream	-899	571	Upstream
MYC2_1647.AT1G22750	chr1	8049755	8049965	211	*	36	2.6495	3.65933	2.19401	MYC2_1647	AT1G22750	8050860	8052930	+	upstream	-1105	895	Upstream
MYC2_1649.AT1G22767	chr1	8060555	8061222	668	*	76	3.83299	7.6199	5.89414	MYC2_1649	AT1G22767	8061042	8061176	-	includeFeature	621	46	Upstream
MYC2_1649.AT1G22770	chr1	8060555	8061222	668	*	76	3.83299	7.6199	5.89414	MYC2_1649	AT1G22770	8061844	8067716	+	upstream	-1289	622	Upstream
MYC2_1650.AT1G22790	chr1	8069233	8069528	296	*	79	3.85235	7.9264	6.19494	MYC2_1650	AT1G22790	8069487	8071562	+	overlapStart	-254	41	Upstream
MYC2_1651.AT1G22810	chr1	8075001	8076035	1035	*	218	6.76837	21.8888	19.7337	MYC2_1651	AT1G22810	8074231	8075037	-	overlapStart	36	36	Upstream
MYC2_1651.AT1G22830	chr1	8075001	8076035	1035	*	218	6.76837	21.8888	19.7337	MYC2_1651	AT1G22830	8076573	8079116	+	upstream	-1572	538	Upstream
MYC2_1652.AT1G22830	chr1	8076380	8076674	295	*	67	3.55567	6.74756	5.06605	MYC2_1652	AT1G22830	8076573	8079116	+	overlapStart	-193	101	Upstream
MYC2_1654.AT1G22870	chr1	8089179	8089404	226	*	59	3.13356	5.97759	4.35947	MYC2_1654	AT1G22870	8089501	8094173	+	upstream	-322	97	Upstream
MYC2_1655.AT1G22882	chr1	8098009	8098321	313	*	114	4.84655	11.4485	9.56021	MYC2_1655	AT1G22882	8098767	8101351	+	upstream	-758	446	Upstream
MYC2_1656.AT1G22900	chr1	8104472	8105674	1203	*	203	6.88733	20.3551	18.2246	MYC2_1656	AT1G22900	8103659	8104505	-	overlapStart	33	33	Upstream
MYC2_1656.AT1G22910	chr1	8104472	8105674	1203	*	203	6.88733	20.3551	18.2246	MYC2_1656	AT1G22910	8105589	8108164	+	overlapStart	-1117	85	Upstream
MYC2_1658.AT1G22930	chr1	8117027	8117571	545	*	69	3.64134	6.93868	5.24933	MYC2_1658	AT1G22930	8117339	8122127	+	overlapStart	-312	232	Upstream
MYC2_1659.AT1G22940	chr1	8121859	8122289	431	*	35	2.53562	3.57901	2.151	MYC2_1659	AT1G22940	8122339	8125068	+	upstream	-480	50	Upstream
MYC2_1660.AT1G22990	chr1	8138100	8138580	481	*	54	3.26092	5.43708	3.83145	MYC2_1660	AT1G22990	8139165	8140202	+	upstream	-1065	585	Upstream
MYC2_1666.AT1G23020	chr1	8153353	8153818	466	*	30	2.26894	3.01962	1.65049	MYC2_1666	AT1G23020	8150070	8153530	-	overlapStart	177	177	Upstream
MYC2_1668.AT1G23030	chr1	8155761	8156130	370	*	60	3.46473	6.08252	4.43613	MYC2_1668	AT1G23030	8156646	8159077	+	upstream	-885	516	Upstream
MYC2_1669.AT1G23030	chr1	8156482	8156681	200	*	31	2.44569	3.12521	1.71436	MYC2_1669	AT1G23030	8156646	8159077	+	overlapStart	-164	35	Upstream
MYC2_1672.AT1G23050	chr1	8167169	8167447	279	*	17	1.83427	1.72792	0.517312	MYC2_1672	AT1G23050	8168443	8169267	+	upstream	-1274	996	Upstream
MYC2_1673.AT1G23052	chr1	8169156	8169581	426	*	96	4.48377	9.64772	7.82338	MYC2_1673	AT1G23052	8168443	8169267	-	overlapStart	111	111	Upstream
MYC2_1674.AT1G23060	chr1	8172920	8173314	395	*	120	4.79912	12.0076	10.1079	MYC2_1674	AT1G23060	8170755	8172992	-	overlapStart	72	72	Upstream
MYC2_1675.AT1G23070	chr1	8175751	8176637	887	*	181	6.52185	18.1248	16.038	MYC2_1675	AT1G23070	8173823	8175819	-	overlapStart	68	68	Upstream
MYC2_1676.AT1G23070	chr1	8176750	8177375	626	*	42	2.71271	4.26334	2.74684	MYC2_1676	AT1G23070	8173823	8175819	-	upstream	-931	931	Upstream
MYC2_1676.AT1G23074	chr1	8176750	8177375	626	*	42	2.71271	4.26334	2.74684	MYC2_1676	AT1G23074	8177832	8177996	+	upstream	-1082	457	Upstream
MYC2_1677.AT1G23074	chr1	8177631	8178239	609	*	81	4.07615	8.15838	6.39981	MYC2_1677	AT1G23074	8177832	8177996	+	includeFeature	-201	201	Upstream
MYC2_1680.AT1G23080	chr1	8183988	8184294	307	*	144	5.33235	14.4067	12.4313	MYC2_1680	AT1G23080	8180577	8183570	-	upstream	-418	418	Upstream
MYC2_1682.AT1G23090	chr1	8188818	8189109	292	*	67	3.66854	6.75201	5.06605	MYC2_1682	AT1G23090	8184952	8189064	-	overlapStart	246	45	Upstream
MYC2_1687.AT1G23110	chr1	8198240	8198735	496	*	67	3.66854	6.75201	5.06605	MYC2_1687	AT1G23110	8196447	8198331	-	overlapStart	91	91	Upstream
MYC2_1687.AT1G23120	chr1	8198240	8198735	496	*	67	3.66854	6.75201	5.06605	MYC2_1687	AT1G23120	8198720	8199557	+	overlapStart	-480	15	Upstream
MYC2_1688.AT1G23130	chr1	8199521	8199799	279	*	36	2.6495	3.65933	2.19401	MYC2_1688	AT1G23130	8200383	8201235	+	upstream	-862	584	Upstream
MYC2_1691.AT1G23310	chr1	8271844	8272251	408	*	98	4.19679	9.87209	8.04466	MYC2_1691	AT1G23310	8268404	8271933	-	overlapStart	89	89	Upstream
MYC2_1692.AT1G23330	chr1	8282037	8282630	594	*	484	12.1257	48.4991	46.0011	MYC2_1692	AT1G23330	8279588	8281891	-	upstream	-146	146	Upstream
MYC2_1696.AT1G23380	chr1	8302539	8302893	355	*	54	3.26092	5.43708	3.83145	MYC2_1696	AT1G23380	8297291	8302651	-	overlapStart	112	112	Upstream
MYC2_1700.AT1G23390	chr1	8310463	8310804	342	*	36	2.6495	3.65933	2.19401	MYC2_1700	AT1G23390	8309112	8310649	-	overlapStart	186	155	Upstream
MYC2_1701.AT1G23390	chr1	8311306	8311509	204	*	48	3.05712	4.81704	3.25478	MYC2_1701	AT1G23390	8309112	8310649	-	upstream	-657	657	Upstream
MYC2_1702.AT1G23440	chr1	8321010	8321756	747	*	457	11.8208	45.7138	43.2382	MYC2_1702	AT1G23440	8321680	8324240	+	overlapStart	-670	76	Upstream
MYC2_1703.AT1G23450	chr1	8324339	8324577	239	*	17	1.81983	1.70366	0.517312	MYC2_1703	AT1G23450	8324698	8326697	+	upstream	-359	121	Upstream
MYC2_1704.AT1G23480	chr1	8332303	8333263	961	*	145	5.70662	14.5479	12.5546	MYC2_1704	AT1G23480	8333020	8336385	+	overlapStart	-717	243	Upstream
MYC2_1706.AT1G23490	chr1	8336443	8336647	205	*	42	2.71271	4.26334	2.74684	MYC2_1706	AT1G23490	8336683	8338672	+	upstream	-240	36	Upstream
MYC2_1707.AT1G23500	chr1	8338483	8339008	526	*	163	6.11423	16.3081	14.2657	MYC2_1707	AT1G23500	8339668	8341072	+	upstream	-1185	660	Upstream
MYC2_1708.AT1G23540	chr1	8350013	8350421	409	*	40	2.75493	4.0267	2.54899	MYC2_1708	AT1G23540	8346827	8349786	-	upstream	-227	227	Upstream
MYC2_1708.AT1G23550	chr1	8350013	8350421	409	*	40	2.75493	4.0267	2.54899	MYC2_1708	AT1G23550	8350793	8352791	+	upstream	-780	372	Upstream
MYC2_1712.AT1G23710	chr1	8384548	8385358	811	*	341	9.70533	34.157	31.8096	MYC2_1712	AT1G23710	8385251	8386426	+	overlapStart	-703	107	Upstream
MYC2_1713.AT1G23730	chr1	8394520	8394827	308	*	36	2.6495	3.65933	2.19401	MYC2_1713	AT1G23730	8395557	8398144	+	upstream	-1037	730	Upstream
MYC2_1714.AT1G23810	chr1	8416338	8416658	321	*	31	2.44569	3.12521	1.71436	MYC2_1714	AT1G23810	8417495	8418566	+	upstream	-1157	837	Upstream
MYC2_1715.AT1G23820	chr1	8419940	8420648	709	*	457	11.5556	45.7043	43.235	MYC2_1715	AT1G23820	8420265	8422985	+	overlapStart	-325	325	Upstream
MYC2_1716.AT1G23850	chr1	8427044	8427552	509	*	1146	20.0626	114.639	111.355	MYC2_1716	AT1G23850	8425739	8427235	-	overlapStart	191	191	Upstream
MYC2_1717.AT1G23860	chr1	8429757	8430327	571	*	178	6.39924	17.8337	15.7635	MYC2_1717	AT1G23860	8427356	8429498	-	upstream	-259	259	Upstream
MYC2_1718.AT1G23870	chr1	8430618	8431297	680	*	321	8.70951	32.1559	29.8354	MYC2_1718	AT1G23870	8432179	8435656	+	upstream	-1561	882	Upstream
MYC2_1719.AT1G23870	chr1	8431879	8432382	504	*	744	16.487	74.4483	71.7319	MYC2_1719	AT1G23870	8432179	8435656	+	overlapStart	-300	203	Upstream
MYC2_1721.AT1G23890	chr1	8440587	8440973	387	*	58	3.14871	5.81098	4.19717	MYC2_1721	AT1G23890	8438766	8440866	-	overlapStart	279	107	Upstream
MYC2_1721.AT1G23900	chr1	8440587	8440973	387	*	58	3.14871	5.81098	4.19717	MYC2_1721	AT1G23900	8441146	8447519	+	upstream	-559	173	Upstream
MYC2_1725.AT1G23965	chr1	8481781	8481965	185	*	26	2.23101	2.60369	1.2736	MYC2_1725	AT1G23965	8480422	8481486	-	upstream	-295	295	Upstream
MYC2_1726.AT1G23970	chr1	8484122	8484479	358	*	81	4.07615	8.15838	6.39981	MYC2_1726	AT1G23970	8482013	8483875	-	upstream	-247	247	Upstream
MYC2_1732.AT1G24070	chr1	8519865	8520458	594	*	494	11.7297	49.474	46.9666	MYC2_1732	AT1G24070	8516238	8519734	-	upstream	-131	131	Upstream
MYC2_1732.AT1G24080	chr1	8519865	8520458	594	*	494	11.7297	49.474	46.9666	MYC2_1732	AT1G24080	8520290	8520363	-	includeFeature	498	95	Upstream
MYC2_1732.AT1G24090	chr1	8519865	8520458	594	*	494	11.7297	49.474	46.9666	MYC2_1732	AT1G24090	8520834	8523121	+	upstream	-969	376	Upstream
MYC2_1734.AT1G24100	chr1	8527007	8527310	304	*	223	7.12804	22.358	20.1879	MYC2_1734	AT1G24100	8525435	8527087	-	overlapStart	80	80	Upstream
MYC2_1734.AT1G24110	chr1	8527007	8527310	304	*	223	7.12804	22.358	20.1879	MYC2_1734	AT1G24110	8527838	8528818	+	upstream	-831	528	Upstream
MYC2_1735.AT1G24120	chr1	8532114	8532420	307	*	81	4.07615	8.15838	6.39981	MYC2_1735	AT1G24120	8529143	8532212	-	overlapStart	98	98	Upstream
MYC2_1736.AT1G24120	chr1	8532815	8533649	835	*	128	5.299	12.8481	10.9066	MYC2_1736	AT1G24120	8529143	8532212	-	upstream	-603	603	Upstream
MYC2_1737.AT1G24130	chr1	8535605	8535789	185	*	31	2.44569	3.12521	1.71436	MYC2_1737	AT1G24130	8534183	8535430	-	upstream	-175	175	Upstream
MYC2_1738.AT1G24140	chr1	8537460	8537812	353	*	49	2.85427	4.92532	3.36063	MYC2_1738	AT1G24140	8536045	8537387	-	upstream	-73	73	Upstream
MYC2_1740.AT1G24145	chr1	8540537	8540991	455	*	190	6.72566	19.0532	16.9457	MYC2_1740	AT1G24145	8541027	8541739	+	upstream	-490	36	Upstream
MYC2_1741.AT1G24147	chr1	8541762	8542321	560	*	120	5.09519	12.0221	10.1079	MYC2_1741	AT1G24147	8542446	8543474	+	upstream	-684	125	Upstream
MYC2_1742.AT1G24148	chr1	8543869	8544555	687	*	88	4.27996	8.89315	7.10093	MYC2_1742	AT1G24148	8544250	8545551	+	overlapStart	-381	305	Upstream
MYC2_1743.AT1G24160	chr1	8557225	8557518	294	*	20	1.95188	2.00467	0.776713	MYC2_1743	AT1G24160	8553411	8556555	-	upstream	-670	670	Upstream
MYC2_1744.AT1G24170	chr1	8558567	8560062	1496	*	477	11.8428	47.7721	45.2827	MYC2_1744	AT1G24170	8557216	8558832	-	overlapStart	265	265	Upstream
MYC2_1746.AT1G24180	chr1	8563385	8563824	440	*	123	4.92587	12.3201	10.4028	MYC2_1746	AT1G24180	8560525	8563495	-	overlapStart	110	110	Upstream
MYC2_1747.AT1G24260	chr1	8596379	8596884	506	*	190	6.72566	19.0532	16.9457	MYC2_1747	AT1G24260	8593637	8596105	-	upstream	-274	274	Upstream
MYC2_1749.AT1G24320	chr1	8631039	8631426	388	*	164	5.82881	16.4351	14.3917	MYC2_1749	AT1G24320	8626315	8630971	-	upstream	-68	68	Upstream
MYC2_1749.AT1G24330	chr1	8631039	8631426	388	*	164	5.82881	16.4351	14.3917	MYC2_1749	AT1G24330	8631440	8635055	+	upstream	-401	14	Upstream
MYC2_1750.AT1G24350	chr1	8640526	8640928	403	*	27	2.1732	2.70826	1.35458	MYC2_1750	AT1G24350	8638520	8640825	-	overlapStart	299	103	Upstream
MYC2_1750.AT1G24360	chr1	8640526	8640928	403	*	27	2.1732	2.70826	1.35458	MYC2_1750	AT1G24360	8640582	8643478	+	overlapStart	-56	56	Upstream
MYC2_1751.AT1G24400	chr1	8654595	8654779	185	*	31	2.44569	3.12521	1.71436	MYC2_1751	AT1G24400	8651407	8653828	-	upstream	-767	767	Upstream
MYC2_1751.AT1G24405	chr1	8654595	8654779	185	*	31	2.44569	3.12521	1.71436	MYC2_1751	AT1G24405	8655246	8655650	+	upstream	-651	467	Upstream
MYC2_1752.AT1G24460	chr1	8665621	8665841	221	*	60	3.34503	6.04849	4.42795	MYC2_1752	AT1G24460	8665874	8672651	+	upstream	-253	33	Upstream
MYC2_1754.AT1G24530	chr1	8692867	8693457	591	*	64	3.40416	6.40453	4.75174	MYC2_1754	AT1G24530	8693227	8694705	+	overlapStart	-360	230	Upstream
MYC2_1761.AT1G24575	chr1	8711845	8712166	322	*	77	3.5701	7.74266	6.01469	MYC2_1761	AT1G24575	8711036	8711528	-	upstream	-317	317	Upstream
MYC2_1762.AT1G24600	chr1	8719141	8719644	504	*	93	4.32918	9.30071	7.50226	MYC2_1762	AT1G24600	8720309	8720721	+	upstream	-1168	665	Upstream
MYC2_1763.AT1G24625	chr1	8726867	8728670	1804	*	628	14.6742	62.8503	60.2333	MYC2_1763	AT1G24625	8725883	8727212	-	overlapStart	345	345	Upstream
MYC2_1763.AT1G24640	chr1	8726867	8728670	1804	*	628	14.6742	62.8503	60.2333	MYC2_1763	AT1G24640	8729280	8732681	+	upstream	-2413	610	Upstream
MYC2_1764.AT1G24650	chr1	8734176	8734519	344	*	31	2.44501	3.12391	1.71436	MYC2_1764	AT1G24650	8734570	8737315	+	upstream	-394	51	Upstream
MYC2_1766.AT1G24733	chr1	8756065	8756528	464	*	64	3.51167	6.41431	4.76138	MYC2_1766	AT1G24733	8757069	8757362	+	upstream	-1004	541	Upstream
MYC2_1767.AT1G24793	chr1	8767229	8767642	414	*	58	3.09711	5.88783	4.27208	MYC2_1767	AT1G24793	8767562	8769438	+	overlapStart	-333	80	Upstream
MYC2_1768.AT1G24800	chr1	8769110	8769823	714	*	56	3.09084	5.67374	4.06283	MYC2_1768	AT1G24800	8769660	8771251	+	overlapStart	-550	163	Upstream
MYC2_1770.AT1G24880	chr1	8775650	8776332	683	*	89	4.17182	8.94116	7.14867	MYC2_1770	AT1G24880	8775901	8783775	+	overlapStart	-251	251	Upstream
MYC2_1771.AT1G24822	chr1	8776531	8778278	1748	*	367	9.78634	36.7319	34.3484	MYC2_1771	AT1G24822	8774997	8777882	-	overlapStart	1351	396	Upstream
MYC2_1771.AT1G24851	chr1	8776531	8778278	1748	*	367	9.78634	36.7319	34.3484	MYC2_1771	AT1G24851	8778280	8779056	+	upstream	-1749	2	Upstream
MYC2_1772.AT1G24822	chr1	8778612	8778886	275	*	32	2.46517	3.29685	1.88013	MYC2_1772	AT1G24822	8774997	8777882	-	upstream	-730	730	Upstream
MYC2_1775.AT1G24881	chr1	8783488	8784202	715	*	68	3.41758	6.89008	5.20194	MYC2_1775	AT1G24881	8784036	8785634	+	overlapStart	-548	166	Upstream
MYC2_1779.AT1G24967	chr1	8798242	8798903	662	*	64	3.31443	6.41664	4.76332	MYC2_1779	AT1G24967	8793821	8797942	-	upstream	-300	300	Upstream
MYC2_1779.AT1G25054	chr1	8798242	8798903	662	*	64	3.31443	6.41664	4.76332	MYC2_1779	AT1G25054	8798483	8806360	+	overlapStart	-241	241	Upstream
MYC2_1780.AT1G24996	chr1	8799095	8800881	1787	*	329	9.22034	32.9365	30.6035	MYC2_1780	AT1G24996	8799520	8800410	-	includeFeature	1315	425	Upstream
MYC2_1780.AT1G25025	chr1	8799095	8800881	1787	*	329	9.22034	32.9365	30.6035	MYC2_1780	AT1G25025	8800808	8801584	+	overlapStart	-1713	73	Upstream
MYC2_1783.AT1G25055	chr1	8805948	8806783	836	*	79	3.65811	7.96747	6.23529	MYC2_1783	AT1G25055	8806607	8808156	+	overlapStart	-659	176	Upstream
MYC2_1785.AT1G25097	chr1	8812446	8815237	2792	*	261	7.63905	26.1275	23.8891	MYC2_1785	AT1G25097	8811905	8814788	-	overlapStart	2342	449	Upstream
MYC2_1785.AT1G25098	chr1	8812446	8815237	2792	*	261	7.63905	26.1275	23.8891	MYC2_1785	AT1G25098	8812811	8814450	+	includeFeature	-365	365	Upstream
MYC2_1785.AT1G25112	chr1	8812446	8815237	2792	*	261	7.63905	26.1275	23.8891	MYC2_1785	AT1G25112	8815186	8815962	+	overlapStart	-2740	51	Upstream
MYC2_1786.AT1G25097	chr1	8815592	8815904	313	*	36	2.58127	3.67311	2.20756	MYC2_1786	AT1G25097	8811905	8814788	-	upstream	-804	804	Upstream
MYC2_1787.AT1G25145	chr1	8818580	8818910	331	*	31	2.28017	3.16169	1.7494	MYC2_1787	AT1G25145	8818867	8820736	+	overlapStart	-287	43	Upstream
MYC2_1788.AT1G25150	chr1	8820089	8820319	231	*	22	1.98866	2.24102	0.952231	MYC2_1788	AT1G25150	8821008	8822533	+	upstream	-919	689	Upstream
MYC2_1789.AT1G25150	chr1	8820457	8821109	653	*	57	3.10602	5.70984	4.09845	MYC2_1789	AT1G25150	8821008	8822533	+	overlapStart	-551	101	Upstream
MYC2_1791.AT1G25175	chr1	8826825	8829650	2826	*	273	7.91171	27.3591	25.1022	MYC2_1791	AT1G25175	8827286	8829320	+	includeFeature	-461	330	Upstream
MYC2_1791.AT1G25180	chr1	8826825	8829650	2826	*	273	7.91171	27.3591	25.1022	MYC2_1791	AT1G25180	8829564	8830340	+	overlapStart	-2739	86	Upstream
MYC2_1793.AT1G25210	chr1	8832893	8833303	411	*	39	2.57762	3.96174	2.48749	MYC2_1793	AT1G25210	8833018	8835112	+	overlapStart	-125	125	Upstream
MYC2_1794.AT1G25211	chr1	8834637	8835507	871	*	81	3.85013	8.18485	6.42612	MYC2_1794	AT1G25211	8835386	8837007	+	overlapStart	-749	121	Upstream
MYC2_1796.AT1G25220	chr1	8839316	8839994	679	*	489	10.8585	48.9677	46.4678	MYC2_1796	AT1G25220	8836835	8839549	-	overlapStart	233	233	Upstream
MYC2_1797.AT1G25230	chr1	8842269	8842529	261	*	104	4.68758	10.4212	8.56585	MYC2_1797	AT1G25230	8840402	8842317	-	overlapStart	48	48	Upstream
MYC2_1798.AT1G25230	chr1	8842667	8843207	541	*	81	4.07615	8.15838	6.39981	MYC2_1798	AT1G25230	8840402	8842317	-	upstream	-350	350	Upstream
MYC2_1800.AT1G25250	chr1	8848116	8848629	514	*	85	4.00731	8.55808	6.79404	MYC2_1800	AT1G25250	8849549	8851612	+	upstream	-1433	920	Upstream
MYC2_1801.AT1G25250	chr1	8848760	8849095	336	*	81	4.07615	8.15838	6.39981	MYC2_1801	AT1G25250	8849549	8851612	+	upstream	-789	454	Upstream
MYC2_1803.AT1G25270	chr1	8857055	8857262	208	*	26	2.1858	2.62675	1.27547	MYC2_1803	AT1G25270	8857726	8859909	+	upstream	-671	464	Upstream
MYC2_1804.AT1G25275	chr1	8860444	8860764	321	*	319	9.30095	31.9943	29.6747	MYC2_1804	AT1G25275	8860671	8861364	+	overlapStart	-227	93	Upstream
MYC2_1806.AT1G25280	chr1	8863500	8863880	381	*	96	4.48377	9.64772	7.82338	MYC2_1806	AT1G25280	8863777	8866805	+	overlapStart	-277	103	Upstream
MYC2_1807.AT1G25290	chr1	8866924	8867172	249	*	29	2.30845	2.98306	1.61634	MYC2_1807	AT1G25290	8867108	8869092	+	overlapStart	-184	64	Upstream
MYC2_1808.AT1G25320	chr1	8877764	8878007	244	*	42	2.80169	4.2895	2.77186	MYC2_1808	AT1G25320	8877857	8880310	+	overlapStart	-93	93	Upstream
MYC2_1812.AT1G25370	chr1	8899127	8899317	191	*	30	2.23397	3.05854	1.68779	MYC2_1812	AT1G25370	8897755	8899102	-	upstream	-25	25	Upstream
MYC2_1813.AT1G25390	chr1	8908903	8909449	547	*	102	4.6226	10.2749	8.441	MYC2_1813	AT1G25390	8906452	8908854	-	upstream	-49	49	Upstream
MYC2_1814.AT1G25390	chr1	8909570	8910286	717	*	322	8.96541	32.2782	29.9484	MYC2_1814	AT1G25390	8906452	8908854	-	upstream	-716	716	Upstream
MYC2_1817.AT1G25400	chr1	8912783	8913390	608	*	1354	25.2722	135.478	131.783	MYC2_1817	AT1G25400	8911130	8912642	-	upstream	-141	141	Upstream
MYC2_1818.AT1G25422	chr1	8918220	8919014	795	*	194	6.50422	19.4053	17.2956	MYC2_1818	AT1G25422	8918852	8919892	+	overlapStart	-632	162	Upstream
MYC2_1820.AT1G25425	chr1	8921598	8922776	1179	*	123	4.56034	12.3654	10.4477	MYC2_1820	AT1G25425	8922700	8923331	+	overlapStart	-1102	76	Upstream
MYC2_1825.AT1G25430	chr1	8933378	8933974	597	*	42	2.85331	4.2239	2.70893	MYC2_1825	AT1G25430	8927732	8933058	-	upstream	-320	320	Upstream
MYC2_1827.AT1G25440	chr1	8935364	8935691	328	*	40	2.75493	4.0267	2.54899	MYC2_1827	AT1G25440	8933716	8935460	-	overlapStart	96	96	Upstream
MYC2_1828.AT1G25440	chr1	8936397	8936716	320	*	31	2.44569	3.12521	1.71436	MYC2_1828	AT1G25440	8933716	8935460	-	upstream	-937	937	Upstream
MYC2_1832.AT1G25500	chr1	8957629	8958350	722	*	1267	22.4045	126.792	123.239	MYC2_1832	AT1G25500	8955249	8957978	-	overlapStart	349	349	Upstream
MYC2_1833.AT1G25500	chr1	8958627	8959530	904	*	126	5.22818	12.6852	10.7635	MYC2_1833	AT1G25500	8955249	8957978	-	upstream	-649	649	Upstream
MYC2_1834.AT1G25510	chr1	8961316	8961530	215	*	36	2.6495	3.65933	2.19401	MYC2_1834	AT1G25510	8959186	8960848	-	upstream	-468	468	Upstream
MYC2_1834.AT1G25520	chr1	8961316	8961530	215	*	36	2.6495	3.65933	2.19401	MYC2_1834	AT1G25520	8962125	8964564	+	upstream	-809	595	Upstream
MYC2_1835.AT1G25510	chr1	8961792	8962191	400	*	128	5.299	12.8481	10.9066	MYC2_1835	AT1G25510	8959186	8960848	-	upstream	-944	944	Upstream
MYC2_1835.AT1G25520	chr1	8961792	8962191	400	*	128	5.299	12.8481	10.9066	MYC2_1835	AT1G25520	8962125	8964564	+	overlapStart	-333	66	Upstream
MYC2_1836.AT1G25540	chr1	8975069	8976696	1628	*	389	10.4294	38.9944	36.5859	MYC2_1836	AT1G25540	8969065	8974660	-	upstream	-409	409	Upstream
MYC2_1836.AT1G25550	chr1	8975069	8976696	1628	*	389	10.4294	38.9944	36.5859	MYC2_1836	AT1G25550	8976434	8978093	+	overlapStart	-1365	262	Upstream
MYC2_1840.AT1G25560	chr1	8981203	8986447	5245	*	655	14.5654	65.5758	62.9369	MYC2_1840	AT1G25560	8981677	8983041	-	includeFeature	1838	474	Upstream
MYC2_1846.AT1G25682	chr1	9004753	9005046	294	*	28	2.25612	2.87716	1.51523	MYC2_1846	AT1G25682	9002285	9004646	-	upstream	-107	107	Upstream
MYC2_1846.AT1G25784	chr1	9004753	9005046	294	*	28	2.25612	2.87716	1.51523	MYC2_1846	AT1G25784	9005557	9010027	+	upstream	-804	511	Upstream
MYC2_1847.AT1G26090	chr1	9020176	9020534	359	*	173	6.01096	17.3034	15.2375	MYC2_1847	AT1G26090	9020380	9022769	+	overlapStart	-204	154	Upstream
MYC2_1848.AT1G26100	chr1	9024206	9024416	211	*	31	2.38479	3.13653	1.7249	MYC2_1848	AT1G26100	9022542	9024081	-	upstream	-125	125	Upstream
MYC2_1850.AT1G26150	chr1	9043421	9043617	197	*	26	2.22175	2.69641	1.34293	MYC2_1850	AT1G26150	9039628	9043288	-	upstream	-133	133	Upstream
MYC2_1851.AT1G26150	chr1	9043737	9044709	973	*	272	8.06973	27.2534	24.9969	MYC2_1851	AT1G26150	9039628	9043288	-	upstream	-449	449	Upstream
MYC2_1852.AT1G26200	chr1	9065361	9065582	222	*	36	2.6495	3.65933	2.19401	MYC2_1852	AT1G26200	9063471	9064914	-	upstream	-447	447	Upstream
MYC2_1853.AT1G26210	chr1	9066056	9067187	1132	*	158	5.90343	15.8098	13.7876	MYC2_1853	AT1G26210	9067039	9068207	+	overlapStart	-983	148	Upstream
MYC2_1855.AT1G26208	chr1	9069038	9069660	623	*	319	7.57706	31.9636	29.6445	MYC2_1855	AT1G26208	9066636	9069238	-	overlapStart	200	200	Upstream
MYC2_1856.AT1G26230	chr1	9076705	9077005	301	*	23	2.01788	2.38861	1.09169	MYC2_1856	AT1G26230	9072256	9076743	-	overlapStart	38	38	Upstream
MYC2_1856.AT1G26233	chr1	9076705	9077005	301	*	23	2.01788	2.38861	1.09169	MYC2_1856	AT1G26233	9076048	9076182	-	upstream	-523	523	Upstream
MYC2_1856.AT1G26235	chr1	9076705	9077005	301	*	23	2.01788	2.38861	1.09169	MYC2_1856	AT1G26235	9076447	9076572	-	upstream	-133	133	Upstream
MYC2_1857.AT1G26250	chr1	9083165	9083485	321	*	54	3.26092	5.43708	3.83145	MYC2_1857	AT1G26250	9083838	9085464	+	upstream	-673	353	Upstream
MYC2_1858.AT1G26270	chr1	9092443	9092691	249	*	41	2.65155	4.1274	2.64674	MYC2_1858	AT1G26270	9089524	9092457	-	overlapStart	14	14	Upstream
MYC2_1859.AT1G26270	chr1	9092795	9093005	211	*	49	2.95032	4.96593	3.40022	MYC2_1859	AT1G26270	9089524	9092457	-	upstream	-338	338	Upstream
MYC2_1861.AT1G26290	chr1	9097666	9098178	513	*	181	6.52185	18.1248	16.038	MYC2_1861	AT1G26290	9097984	9098667	+	overlapStart	-318	194	Upstream
MYC2_1862.AT1G26420	chr1	9143298	9143921	624	*	112	4.89139	11.2129	9.32726	MYC2_1862	AT1G26420	9141567	9143304	-	overlapStart	6	6	Upstream
MYC2_1862.AT1G26430	chr1	9143298	9143921	624	*	112	4.89139	11.2129	9.32726	MYC2_1862	AT1G26430	9143810	9143883	+	includeFeature	-512	38	Upstream
MYC2_1863.AT1G26480	chr1	9158031	9158254	224	*	57	3.12392	5.75231	4.13961	MYC2_1863	AT1G26480	9156329	9157950	-	upstream	-81	81	Upstream
MYC2_1863.AT1G26490	chr1	9158031	9158254	224	*	57	3.12392	5.75231	4.13961	MYC2_1863	AT1G26490	9158183	9158255	+	overlapStart	-152	1	Upstream
MYC2_1863.AT1G26500	chr1	9158031	9158254	224	*	57	3.12392	5.75231	4.13961	MYC2_1863	AT1G26500	9158380	9159897	+	upstream	-349	126	Upstream
MYC2_1866.AT1G26558	chr1	9174715	9175139	425	*	96	4.48377	9.64772	7.82338	MYC2_1866	AT1G26558	9175611	9177598	+	upstream	-896	472	Upstream
MYC2_1869.AT1G26570	chr1	9181833	9182219	387	*	60	3.46473	6.08252	4.43613	MYC2_1869	AT1G26570	9182204	9184393	+	overlapStart	-371	15	Upstream
MYC2_1874.AT1G26690	chr1	9225655	9226015	361	*	54	3.17525	5.4629	3.85622	MYC2_1874	AT1G26690	9224145	9225775	-	overlapStart	120	120	Upstream
MYC2_1878.AT1G26730	chr1	9240715	9241347	633	*	1118	22.0112	111.889	108.654	MYC2_1878	AT1G26730	9241435	9244650	+	upstream	-720	88	Upstream
MYC2_1879.AT1G26761	chr1	9251550	9251801	252	*	81	4.05639	8.11518	6.37939	MYC2_1879	AT1G26761	9250224	9251644	-	overlapStart	94	94	Upstream
MYC2_1880.AT1G26762	chr1	9253355	9253655	301	*	209	7.13327	20.9482	18.8004	MYC2_1880	AT1G26762	9253631	9254167	+	overlapStart	-276	24	Upstream
MYC2_1882.AT1G26770	chr1	9257472	9258850	1379	*	399	10.8018	39.9297	37.5101	MYC2_1882	AT1G26770	9259605	9261313	+	upstream	-2133	755	Upstream
MYC2_1883.AT1G26770	chr1	9259144	9259613	470	*	145	5.70662	14.5479	12.5546	MYC2_1883	AT1G26770	9259605	9261313	+	overlapStart	-461	8	Upstream
MYC2_1886.AT1G26771	chr1	9263128	9263366	239	*	26	2.24189	2.62363	1.2736	MYC2_1886	AT1G26771	9263169	9263273	-	includeFeature	145	41	Upstream
MYC2_1892.AT1G26790	chr1	9275199	9275438	240	*	45	2.75515	4.5231	2.99964	MYC2_1892	AT1G26790	9273857	9275312	-	overlapStart	113	113	Upstream
MYC2_1892.AT1G26795	chr1	9275199	9275438	240	*	45	2.75515	4.5231	2.99964	MYC2_1892	AT1G26795	9276381	9276954	+	upstream	-1182	943	Upstream
MYC2_1894.AT1G26830	chr1	9295520	9295717	198	*	33	2.49838	3.36269	1.94283	MYC2_1894	AT1G26830	9295736	9298541	+	upstream	-216	19	Upstream
MYC2_1898.AT1G26916	chr1	9325710	9326184	475	*	74	3.87235	7.44433	5.72108	MYC2_1898	AT1G26916	9327156	9327251	+	upstream	-1446	972	Upstream
MYC2_1899.AT1G26916	chr1	9326317	9326662	346	*	128	5.299	12.8481	10.9066	MYC2_1899	AT1G26916	9327156	9327251	+	upstream	-839	494	Upstream
MYC2_1900.AT1G26916	chr1	9326863	9327350	488	*	120	5.09519	12.0221	10.1079	MYC2_1900	AT1G26916	9327156	9327251	+	includeFeature	-293	99	Upstream
MYC2_1901.AT1G26920	chr1	9327829	9329720	1892	*	219	7.33708	21.9141	19.747	MYC2_1901	AT1G26920	9329512	9330398	+	overlapStart	-1683	208	Upstream
MYC2_1904.AT1G26921	chr1	9331250	9332506	1257	*	387	10.598	38.7966	36.3889	MYC2_1904	AT1G26921	9330956	9331105	-	upstream	-145	145	Upstream
MYC2_1906.AT1G26930	chr1	9337940	9339104	1165	*	228	7.54089	22.8919	20.7065	MYC2_1906	AT1G26930	9336057	9337786	-	upstream	-154	154	Upstream
MYC2_1909.AT1G26940	chr1	9341634	9342539	906	*	128	5.299	12.8481	10.9066	MYC2_1909	AT1G26940	9343126	9345145	+	upstream	-1492	587	Upstream
MYC2_1912.AT1G26945	chr1	9350006	9350528	523	*	181	6.52185	18.1248	16.038	MYC2_1912	AT1G26945	9351454	9352761	+	upstream	-1448	926	Upstream
MYC2_1915.AT1G26950	chr1	9354904	9355372	469	*	61	3.29741	6.15888	4.5105	MYC2_1915	AT1G26950	9353848	9354324	-	upstream	-580	580	Upstream
MYC2_1915.AT1G26960	chr1	9354904	9355372	469	*	61	3.29741	6.15888	4.5105	MYC2_1915	AT1G26960	9355920	9357460	+	upstream	-1016	548	Upstream
MYC2_1916.AT1G26960	chr1	9355828	9356022	195	*	48	3.05712	4.81704	3.25478	MYC2_1916	AT1G26960	9355920	9357460	+	overlapStart	-92	92	Upstream
MYC2_1919.AT1G26970	chr1	9359175	9359410	236	*	42	2.85331	4.2239	2.70893	MYC2_1919	AT1G26970	9359682	9361833	+	upstream	-507	272	Upstream
MYC2_1920.AT1G26985	chr1	9366956	9367182	227	*	41	2.83072	4.17882	2.69539	MYC2_1920	AT1G26985	9367080	9367179	+	includeFeature	-124	3	Upstream
MYC2_1922.AT1G27008	chr1	9378219	9378664	446	*	96	4.48377	9.64772	7.82338	MYC2_1922	AT1G27008	9376788	9377244	-	upstream	-975	975	Upstream
MYC2_1922.AT1G27020	chr1	9378219	9378664	446	*	96	4.48377	9.64772	7.82338	MYC2_1922	AT1G27020	9378559	9380692	+	overlapStart	-340	105	Upstream
MYC2_1923.AT1G27030	chr1	9380554	9381401	848	*	96	4.48377	9.64772	7.82338	MYC2_1923	AT1G27030	9381803	9383984	+	upstream	-1249	402	Upstream
MYC2_1924.AT1G27030	chr1	9381704	9382000	297	*	33	2.49145	3.34896	1.93008	MYC2_1924	AT1G27030	9381803	9383984	+	overlapStart	-99	99	Upstream
MYC2_1927.AT1G27045	chr1	9391447	9391849	403	*	332	9.57896	33.258	30.915	MYC2_1927	AT1G27045	9391609	9393019	+	overlapStart	-162	162	Upstream
MYC2_1928.AT1G27050	chr1	9393015	9393645	631	*	128	5.299	12.8481	10.9066	MYC2_1928	AT1G27050	9393690	9394592	+	upstream	-675	45	Upstream
MYC2_1934.AT1G27100	chr1	9411298	9411486	189	*	32	2.42813	3.22315	1.80874	MYC2_1934	AT1G27100	9407125	9411172	-	upstream	-126	126	Upstream
MYC2_1935.AT1G27100	chr1	9411736	9412144	409	*	74	3.87235	7.44433	5.72108	MYC2_1935	AT1G27100	9407125	9411172	-	upstream	-564	564	Upstream
MYC2_1936.AT1G27120	chr1	9420409	9420611	203	*	48	3.05712	4.81704	3.25478	MYC2_1936	AT1G27120	9421177	9424069	+	upstream	-768	566	Upstream
MYC2_1937.AT1G27130	chr1	9425099	9425650	552	*	310	8.4858	31.006	28.7006	MYC2_1937	AT1G27130	9425460	9426886	+	overlapStart	-361	190	Upstream
MYC2_1939.AT1G27190	chr1	9449285	9449531	247	*	73	3.81867	7.32806	5.63111	MYC2_1939	AT1G27190	9446657	9448825	-	upstream	-460	460	Upstream
MYC2_1940.AT1G27200	chr1	9451702	9452222	521	*	79	3.86655	7.95932	6.22719	MYC2_1940	AT1G27200	9449549	9451750	-	overlapStart	48	48	Upstream
MYC2_1943.AT1G27210	chr1	9457893	9458337	445	*	54	3.26092	5.43708	3.83145	MYC2_1943	AT1G27210	9455368	9458026	-	overlapStart	133	133	Upstream
MYC2_1945.AT1G27213	chr1	9459926	9461307	1382	*	990	20.177	99.0614	96.0513	MYC2_1945	AT1G27213	9460035	9460187	-	includeFeature	261	109	Upstream
MYC2_1947.AT1G27290	chr1	9481102	9481752	651	*	168	5.54998	16.882	14.8348	MYC2_1947	AT1G27290	9481532	9482912	+	overlapStart	-430	220	Upstream
MYC2_1948.AT1G27300	chr1	9482325	9482888	564	*	27	2.2499	2.75083	1.39498	MYC2_1948	AT1G27300	9483157	9484368	+	upstream	-832	269	Upstream
MYC2_1949.AT1G27300	chr1	9483000	9483300	301	*	104	4.44363	10.4851	8.62825	MYC2_1949	AT1G27300	9483157	9484368	+	overlapStart	-157	143	Upstream
MYC2_1950.AT1G27310	chr1	9486618	9486860	243	*	97	4.39273	9.74876	7.92282	MYC2_1950	AT1G27310	9484316	9485896	-	upstream	-722	722	Upstream
MYC2_1950.AT1G27320	chr1	9486618	9486860	243	*	97	4.39273	9.74876	7.92282	MYC2_1950	AT1G27320	9487780	9492572	+	upstream	-1162	920	Upstream
MYC2_1951.AT1G27330	chr1	9492511	9492910	400	*	53	3.0518	5.38596	3.80837	MYC2_1951	AT1G27330	9492964	9494069	+	upstream	-453	54	Upstream
MYC2_1952.AT1G27340	chr1	9494544	9494934	391	*	158	5.93099	15.8756	13.853	MYC2_1952	AT1G27340	9495520	9498085	+	upstream	-976	586	Upstream
MYC2_1953.AT1G27340	chr1	9495445	9495641	197	*	54	3.26092	5.43708	3.83145	MYC2_1953	AT1G27340	9495520	9498085	+	overlapStart	-75	75	Upstream
MYC2_1954.AT1G27350	chr1	9499366	9499636	271	*	40	2.53183	4.00277	2.52665	MYC2_1954	AT1G27350	9498151	9499425	-	overlapStart	59	59	Upstream
MYC2_1958.AT1G27460	chr1	9534198	9534628	431	*	36	2.56587	3.64142	2.19401	MYC2_1958	AT1G27460	9534532	9537561	+	overlapStart	-334	96	Upstream
MYC2_1959.AT1G27500	chr1	9554245	9554597	353	*	60	3.46473	6.08252	4.43613	MYC2_1959	AT1G27500	9551451	9554139	-	upstream	-106	106	Upstream
MYC2_1960.AT1G27580	chr1	9590965	9591250	286	*	87	4.10914	8.7961	7.02743	MYC2_1960	AT1G27580	9589933	9591075	-	overlapStart	110	110	Upstream
MYC2_1960.AT1G27590	chr1	9590965	9591250	286	*	87	4.10914	8.7961	7.02743	MYC2_1960	AT1G27590	9592128	9594586	+	upstream	-1163	878	Upstream
MYC2_1962.AT1G27600	chr1	9606037	9606221	185	*	26	2.15438	2.66975	1.31704	MYC2_1962	AT1G27600	9603178	9606101	-	overlapStart	64	64	Upstream
MYC2_1963.AT1G27600	chr1	9606571	9606755	185	*	17	1.83427	1.72792	0.517312	MYC2_1963	AT1G27600	9603178	9606101	-	upstream	-470	470	Upstream
MYC2_1965.AT1G27650	chr1	9614318	9614502	185	*	37	2.61491	3.74215	2.27406	MYC2_1965	AT1G27650	9614551	9616357	+	upstream	-233	49	Upstream
MYC2_1970.AT1G27700	chr1	9641724	9642172	449	*	106	4.49125	10.6013	8.74321	MYC2_1970	AT1G27700	9640198	9641901	-	overlapStart	177	177	Upstream
MYC2_1970.AT1G27710	chr1	9641724	9642172	449	*	106	4.49125	10.6013	8.74321	MYC2_1970	AT1G27710	9642474	9643352	+	upstream	-750	302	Upstream
MYC2_1971.AT1G27720	chr1	9647750	9651315	3566	*	800	16.2114	80.0958	77.3226	MYC2_1971	AT1G27720	9643351	9647376	-	upstream	-374	374	Upstream
MYC2_1971.AT1G27730	chr1	9647750	9651315	3566	*	800	16.2114	80.0958	77.3226	MYC2_1971	AT1G27730	9648141	9649073	-	includeFeature	1323	391	Upstream
MYC2_1974.AT1G27760	chr1	9667594	9667987	394	*	336	9.51786	33.6899	31.345	MYC2_1974	AT1G27760	9668584	9671616	+	upstream	-990	597	Upstream
MYC2_1975.AT1G27760	chr1	9668357	9668541	185	*	34	2.48843	3.4812	2.05653	MYC2_1975	AT1G27760	9668584	9671616	+	upstream	-227	43	Upstream
MYC2_1977.AT1G27840	chr1	9696483	9697059	577	*	59	3.38098	5.90547	4.28878	MYC2_1977	AT1G27840	9693008	9696412	-	upstream	-71	71	Upstream
MYC2_1978.AT1G27850	chr1	9697909	9698146	238	*	40	2.76233	4.0416	2.56357	MYC2_1978	AT1G27850	9698417	9703941	+	upstream	-508	271	Upstream
MYC2_1979.AT1G27910	chr1	9724671	9724856	186	*	52	3.17735	5.26315	3.68995	MYC2_1979	AT1G27910	9720736	9724714	-	overlapStart	43	43	Upstream
MYC2_1980.AT1G27910	chr1	9725230	9725979	750	*	234	7.56501	23.4452	21.2563	MYC2_1980	AT1G27910	9720736	9724714	-	upstream	-516	516	Upstream
MYC2_1980.AT1G27920	chr1	9725230	9725979	750	*	234	7.56501	23.4452	21.2563	MYC2_1980	AT1G27920	9726948	9729848	+	upstream	-1718	969	Upstream
MYC2_1981.AT1G27920	chr1	9726350	9726535	186	*	26	2.24189	2.62363	1.2736	MYC2_1981	AT1G27920	9726948	9729848	+	upstream	-598	413	Upstream
MYC2_1982.AT1G27921	chr1	9730163	9730636	474	*	52	3.09655	5.29063	3.71625	MYC2_1982	AT1G27921	9728124	9730331	-	overlapStart	168	168	Upstream
MYC2_1983.AT1G27921	chr1	9730921	9731710	790	*	48	3.05712	4.81704	3.25478	MYC2_1983	AT1G27921	9728124	9730331	-	upstream	-590	590	Upstream
MYC2_1984.AT1G27930	chr1	9732447	9732779	333	*	64	3.54206	6.48022	4.82532	MYC2_1984	AT1G27930	9731260	9732719	-	overlapStart	272	60	Upstream
MYC2_1985.AT1G27940	chr1	9738319	9738556	238	*	60	3.44269	6.03609	4.41582	MYC2_1985	AT1G27940	9733597	9738129	-	upstream	-190	190	Upstream
MYC2_1986.AT1G27940	chr1	9739098	9739431	334	*	102	4.62725	10.2854	8.4514	MYC2_1986	AT1G27940	9733597	9738129	-	upstream	-969	969	Upstream
MYC2_1987.AT1G27950	chr1	9739746	9740638	893	*	73	3.84771	7.39105	5.69251	MYC2_1987	AT1G27950	9740704	9742159	+	upstream	-958	66	Upstream
MYC2_1991.AT1G27980	chr1	9748039	9748398	360	*	88	4.24412	8.81395	7.04491	MYC2_1991	AT1G27980	9748737	9752769	+	upstream	-698	339	Upstream
MYC2_1992.AT1G27980	chr1	9748540	9749177	638	*	72	3.48856	7.29743	5.60088	MYC2_1992	AT1G27980	9748737	9752769	+	overlapStart	-197	197	Upstream
MYC2_1994.AT1G28010	chr1	9762159	9762536	378	*	279	8.55993	27.9475	25.6778	MYC2_1994	AT1G28010	9763436	9768068	+	upstream	-1277	900	Upstream
MYC2_1995.AT1G28010	chr1	9762983	9763356	374	*	122	4.76043	12.2445	10.328	MYC2_1995	AT1G28010	9763436	9768068	+	upstream	-453	80	Upstream
MYC2_1996.AT1G28050	chr1	9777318	9778638	1321	*	1479	25.9198	147.988	144.151	MYC2_1996	AT1G28050	9775528	9777810	-	overlapStart	492	492	Upstream
MYC2_1996.AT1G28060	chr1	9777318	9778638	1321	*	1479	25.9198	147.988	144.151	MYC2_1996	AT1G28060	9779138	9782700	+	upstream	-1820	500	Upstream
MYC2_1997.AT1G28070	chr1	9782553	9782891	339	*	41	2.81093	4.13921	2.65816	MYC2_1997	AT1G28070	9782996	9783998	+	upstream	-443	105	Upstream
MYC2_2000.AT1G28130	chr1	9824105	9824363	259	*	67	3.66854	6.75201	5.06605	MYC2_2000	AT1G28130	9825286	9828067	+	upstream	-1181	923	Upstream
MYC2_2001.AT1G28135	chr1	9828293	9828487	195	*	48	3.05712	4.81704	3.25478	MYC2_2001	AT1G28135	9829261	9829584	+	upstream	-968	774	Upstream
MYC2_2004.AT1G28180	chr1	9845897	9847025	1129	*	321	9.37516	32.1769	29.8476	MYC2_2004	AT1G28180	9843075	9845002	-	upstream	-895	895	Upstream
MYC2_2005.AT1G28190	chr1	9847750	9848590	841	*	181	6.52185	18.1248	16.038	MYC2_2005	AT1G28190	9846884	9847923	-	overlapStart	173	173	Upstream
MYC2_2006.AT1G28190	chr1	9848743	9849079	337	*	81	4.07615	8.15838	6.39981	MYC2_2006	AT1G28190	9846884	9847923	-	upstream	-820	820	Upstream
MYC2_2008.AT1G28200	chr1	9852362	9852640	279	*	81	4.07615	8.15838	6.39981	MYC2_2008	AT1G28200	9850147	9852366	-	overlapStart	4	4	Upstream
MYC2_2009.AT1G28230	chr1	9864624	9865351	728	*	135	5.45925	13.5896	11.6398	MYC2_2009	AT1G28230	9862073	9864606	-	upstream	-18	18	Upstream
MYC2_2011.AT1G28250	chr1	9873905	9874364	460	*	85	3.99542	8.53011	6.76683	MYC2_2011	AT1G28250	9874247	9875579	+	overlapStart	-342	117	Upstream
MYC2_2012.AT1G28260	chr1	9879067	9879483	417	*	62	3.08872	6.26489	4.61491	MYC2_2012	AT1G28260	9875600	9879267	-	overlapStart	200	200	Upstream
MYC2_2016.AT1G28280	chr1	9887313	9887974	662	*	395	9.95373	39.5725	37.1615	MYC2_2016	AT1G28280	9886077	9887478	-	overlapStart	165	165	Upstream
MYC2_2016.AT1G28281	chr1	9887313	9887974	662	*	395	9.95373	39.5725	37.1615	MYC2_2016	AT1G28281	9887519	9887656	+	includeFeature	-206	206	Upstream
MYC2_2020.AT1G28330	chr1	9935565	9935954	390	*	42	2.85331	4.2239	2.70893	MYC2_2020	AT1G28330	9933884	9935271	-	upstream	-294	294	Upstream
MYC2_2021.AT1G28330	chr1	9936154	9936401	248	*	48	3.05712	4.81704	3.25478	MYC2_2021	AT1G28330	9933884	9935271	-	upstream	-883	883	Upstream
MYC2_2021.AT1G28335	chr1	9936154	9936401	248	*	48	3.05712	4.81704	3.25478	MYC2_2021	AT1G28335	9937001	9937733	+	upstream	-847	600	Upstream
MYC2_2023.AT1G28350	chr1	9943553	9944037	485	*	76	3.83443	7.62314	5.89729	MYC2_2023	AT1G28350	9944036	9949800	+	overlapStart	-483	1	Upstream
MYC2_2024.AT1G28360	chr1	9949844	9951140	1297	*	189	6.51609	18.9933	16.899	MYC2_2024	AT1G28360	9951848	9952740	+	upstream	-2004	708	Upstream
MYC2_2025.AT1G28360	chr1	9951386	9951963	578	*	54	3.26092	5.43708	3.83145	MYC2_2025	AT1G28360	9951848	9952740	+	overlapStart	-462	115	Upstream
MYC2_2028.AT1G28370	chr1	9956671	9957455	785	*	154	5.91042	15.4207	13.4024	MYC2_2028	AT1G28370	9955969	9956940	-	overlapStart	269	269	Upstream
MYC2_2029.AT1G28375	chr1	9959424	9960899	1476	*	1797	30.9358	179.797	175.585	MYC2_2029	AT1G28375	9961055	9961703	+	upstream	-1631	156	Upstream
MYC2_2030.AT1G28380	chr1	9962614	9962825	212	*	21	2.03808	2.15698	0.872271	MYC2_2030	AT1G28380	9963593	9966320	+	upstream	-979	768	Upstream
MYC2_2031.AT1G28380	chr1	9963209	9963851	643	*	565	13.6551	56.5825	54.0171	MYC2_2031	AT1G28380	9963593	9966320	+	overlapStart	-384	258	Upstream
MYC2_2032.AT1G28395	chr1	9972159	9972535	377	*	31	2.44569	3.12521	1.71436	MYC2_2032	AT1G28395	9969321	9971681	-	upstream	-478	478	Upstream
MYC2_2040.AT1G28480	chr1	10013940	10014594	655	*	2235	33.88	223.507	218.82	MYC2_2040	AT1G28480	10013474	10014073	-	overlapStart	133	133	Upstream
MYC2_2041.AT1G28480	chr1	10014763	10015400	638	*	181	6.52185	18.1248	16.038	MYC2_2041	AT1G28480	10013474	10014073	-	upstream	-690	690	Upstream
MYC2_2041.AT1G28490	chr1	10014763	10015400	638	*	181	6.52185	18.1248	16.038	MYC2_2041	AT1G28490	10015919	10018047	+	upstream	-1156	519	Upstream
MYC2_2043.AT1G28520	chr1	10028940	10029253	314	*	74	3.87235	7.44433	5.72108	MYC2_2043	AT1G28520	10029150	10031990	+	overlapStart	-210	103	Upstream
MYC2_2044.AT1G28530	chr1	10035557	10035846	290	*	37	2.61491	3.74215	2.27406	MYC2_2044	AT1G28530	10031997	10035500	-	upstream	-57	57	Upstream
MYC2_2044.AT1G28540	chr1	10035557	10035846	290	*	37	2.61491	3.74215	2.27406	MYC2_2044	AT1G28540	10035664	10036956	+	overlapStart	-107	107	Upstream
MYC2_2046.AT1G28580	chr1	10046310	10047296	987	*	343	9.78277	34.3482	31.9919	MYC2_2046	AT1G28580	10044337	10046442	-	overlapStart	132	132	Upstream
MYC2_2047.AT1G28590	chr1	10050082	10050519	438	*	219	7.33708	21.9141	19.747	MYC2_2047	AT1G28590	10047276	10049300	-	upstream	-782	782	Upstream
MYC2_2047.AT1G28591	chr1	10050082	10050519	438	*	219	7.33708	21.9141	19.747	MYC2_2047	AT1G28591	10049485	10049857	-	upstream	-225	225	Upstream
MYC2_2048.AT1G28591	chr1	10050629	10051183	555	*	128	5.299	12.8481	10.9066	MYC2_2048	AT1G28591	10049485	10049857	-	upstream	-772	772	Upstream
MYC2_2050.AT1G28600	chr1	10052903	10053366	464	*	67	3.66854	6.75201	5.06605	MYC2_2050	AT1G28600	10051001	10053117	-	overlapStart	214	214	Upstream
MYC2_2051.AT1G28600	chr1	10053550	10053785	236	*	42	2.85331	4.2239	2.70893	MYC2_2051	AT1G28600	10051001	10053117	-	upstream	-433	433	Upstream
MYC2_2052.AT1G28610	chr1	10055675	10056286	612	*	104	4.68758	10.4212	8.56585	MYC2_2052	AT1G28610	10053617	10055731	-	overlapStart	56	56	Upstream
MYC2_2055.AT1G28650	chr1	10071469	10071856	388	*	53	3.23035	5.37365	3.79745	MYC2_2055	AT1G28650	10069365	10071082	-	upstream	-387	387	Upstream
MYC2_2056.AT1G28670	chr1	10076329	10076982	654	*	50	3.09278	5.08538	3.51685	MYC2_2056	AT1G28670	10074507	10076344	-	overlapStart	15	15	Upstream
MYC2_2057.AT1G28680	chr1	10077558	10078196	639	*	56	3.2437	5.61139	4.00223	MYC2_2057	AT1G28680	10078189	10080029	+	overlapStart	-631	7	Upstream
MYC2_2058.AT1G28960	chr1	10111532	10112327	796	*	1032	20.7884	103.299	100.227	MYC2_2058	AT1G28960	10109500	10111660	-	overlapStart	128	128	Upstream
MYC2_2058.AT1G29000	chr1	10111532	10112327	796	*	1032	20.7884	103.299	100.227	MYC2_2058	AT1G29000	10113018	10114340	+	upstream	-1486	691	Upstream
MYC2_2061.AT1G29050	chr1	10139736	10140229	494	*	31	2.44569	3.12521	1.71436	MYC2_2061	AT1G29050	10136230	10139208	-	upstream	-528	528	Upstream
MYC2_2065.AT1G29060	chr1	10146380	10146777	398	*	74	3.87235	7.44433	5.72108	MYC2_2065	AT1G29060	10147693	10149686	+	upstream	-1313	916	Upstream
MYC2_2066.AT1G29060	chr1	10147280	10147706	427	*	42	2.85331	4.2239	2.70893	MYC2_2066	AT1G29060	10147693	10149686	+	overlapStart	-413	13	Upstream
MYC2_2067.AT1G29160	chr1	10184409	10184735	327	*	112	4.89139	11.2129	9.32726	MYC2_2067	AT1G29160	10183797	10184324	-	upstream	-85	85	Upstream
MYC2_2070.AT1G29230	chr1	10214397	10214756	360	*	53	3.24017	5.39406	3.81631	MYC2_2070	AT1G29230	10214860	10216422	+	upstream	-463	104	Upstream
MYC2_2071.AT1G29240	chr1	10220237	10220440	204	*	36	2.6495	3.65933	2.19401	MYC2_2071	AT1G29240	10216779	10219846	-	upstream	-391	391	Upstream
MYC2_2074.AT1G29270	chr1	10229243	10229766	524	*	81	4.07615	8.15838	6.39981	MYC2_2074	AT1G29270	10230087	10231142	+	upstream	-844	321	Upstream
MYC2_2085.AT1G29290	chr1	10244155	10244406	252	*	36	2.6495	3.65933	2.19401	MYC2_2085	AT1G29290	10244966	10245572	+	upstream	-811	560	Upstream
MYC2_2086.AT1G29290	chr1	10244698	10244991	294	*	67	3.66854	6.75201	5.06605	MYC2_2086	AT1G29290	10244966	10245572	+	overlapStart	-268	25	Upstream
MYC2_2088.AT1G29300	chr1	10249560	10249901	342	*	36	2.6495	3.65933	2.19401	MYC2_2088	AT1G29300	10247780	10249594	-	overlapStart	34	34	Upstream
MYC2_2089.AT1G29310	chr1	10251109	10251354	246	*	48	3.05712	4.81704	3.25478	MYC2_2089	AT1G29310	10252294	10254690	+	upstream	-1185	940	Upstream
MYC2_2091.AT1G29330	chr1	10260983	10262325	1343	*	1256	23.704	125.622	122.092	MYC2_2091	AT1G29330	10258248	10261112	-	overlapStart	129	129	Upstream
MYC2_2093.AT1G29340	chr1	10263626	10264401	776	*	67	3.66854	6.75201	5.06605	MYC2_2093	AT1G29340	10264395	10266818	+	overlapStart	-769	6	Upstream
MYC2_2096.AT1G29390	chr1	10287837	10288118	282	*	48	2.87801	4.80315	3.25478	MYC2_2096	AT1G29390	10286293	10288103	-	overlapStart	266	15	Upstream
MYC2_2097.AT1G29395	chr1	10289417	10290031	615	*	389	9.71869	38.9255	36.5174	MYC2_2097	AT1G29395	10288197	10289621	-	overlapStart	204	204	Upstream
MYC2_2098.AT1G29395	chr1	10290183	10290368	186	*	30	2.41058	3.05858	1.68779	MYC2_2098	AT1G29395	10288197	10289621	-	upstream	-562	562	Upstream
MYC2_2099.AT1G29400	chr1	10294435	10294711	277	*	67	3.66854	6.75201	5.06605	MYC2_2099	AT1G29400	10290040	10294630	-	overlapStart	195	81	Upstream
MYC2_2100.AT1G29400	chr1	10294846	10295107	262	*	60	3.46473	6.08252	4.43613	MYC2_2100	AT1G29400	10290040	10294630	-	upstream	-216	216	Upstream
MYC2_2101.AT1G29400	chr1	10295581	10295964	384	*	48	3.05712	4.81704	3.25478	MYC2_2101	AT1G29400	10290040	10294630	-	upstream	-951	951	Upstream
MYC2_2103.AT1G29430	chr1	10303348	10303839	492	*	42	2.85331	4.2239	2.70893	MYC2_2103	AT1G29430	10302650	10303335	-	upstream	-13	13	Upstream
MYC2_2104.AT1G29440	chr1	10305179	10305744	566	*	149	5.70665	14.9414	12.9439	MYC2_2104	AT1G29440	10304507	10305108	-	upstream	-71	71	Upstream
MYC2_2105.AT1G29460	chr1	10308184	10308429	246	*	69	3.66028	6.98066	5.2909	MYC2_2105	AT1G29460	10307507	10308143	-	upstream	-41	41	Upstream
MYC2_2105.AT1G29465	chr1	10308184	10308429	246	*	69	3.66028	6.98066	5.2909	MYC2_2105	AT1G29465	10308574	10309798	+	upstream	-390	145	Upstream
MYC2_2106.AT1G29500	chr1	10320729	10320988	260	*	33	2.49145	3.34896	1.93008	MYC2_2106	AT1G29500	10321210	10321864	+	upstream	-481	222	Upstream
MYC2_2107.AT1G29510	chr1	10322123	10322519	397	*	54	3.26092	5.43708	3.83145	MYC2_2107	AT1G29510	10322574	10323189	+	upstream	-451	55	Upstream
MYC2_2110.AT1G29640	chr1	10356560	10356772	213	*	21	2.03808	2.15698	0.872271	MYC2_2110	AT1G29640	10355703	10356482	-	upstream	-78	78	Upstream
MYC2_2110.AT1G29650	chr1	10356560	10356772	213	*	21	2.03808	2.15698	0.872271	MYC2_2110	AT1G29650	10357606	10363195	+	upstream	-1046	834	Upstream
MYC2_2116.AT1G29660	chr1	10370938	10371123	186	*	42	2.80169	4.2895	2.77186	MYC2_2116	AT1G29660	10371839	10373766	+	upstream	-901	716	Upstream
MYC2_2117.AT1G29670	chr1	10374677	10375864	1188	*	60	3.36203	6.08616	4.43897	MYC2_2117	AT1G29670	10375763	10377871	+	overlapStart	-1086	101	Upstream
MYC2_2119.AT1G29680	chr1	10378980	10379194	215	*	45	2.84117	4.5455	3.02165	MYC2_2119	AT1G29680	10377790	10378961	-	upstream	-19	19	Upstream
MYC2_2120.AT1G29690	chr1	10381916	10382464	549	*	136	5.50281	13.6902	11.7224	MYC2_2120	AT1G29690	10379020	10382123	-	overlapStart	207	207	Upstream
MYC2_2122.AT1G29900	chr1	10467877	10468062	186	*	41	2.75547	4.19232	2.70849	MYC2_2122	AT1G29900	10468054	10472211	+	overlapStart	-177	8	Upstream
MYC2_2124.AT1G29910	chr1	10473371	10473558	188	*	26	2.24189	2.62363	1.2736	MYC2_2124	AT1G29910	10472280	10473299	-	upstream	-72	72	Upstream
MYC2_2125.AT1G29920	chr1	10475969	10476211	243	*	31	2.44569	3.12521	1.71436	MYC2_2125	AT1G29920	10474784	10475959	-	upstream	-10	10	Upstream
MYC2_2129.AT1G29950	chr1	10491112	10491314	203	*	26	2.24189	2.62363	1.2736	MYC2_2129	AT1G29950	10491698	10494598	+	upstream	-586	384	Upstream
MYC2_2129.AT1G29951	chr1	10491112	10491314	203	*	26	2.24189	2.62363	1.2736	MYC2_2129	AT1G29951	10491975	10494598	+	upstream	-863	661	Upstream
MYC2_2129.AT1G29952	chr1	10491112	10491314	203	*	26	2.24189	2.62363	1.2736	MYC2_2129	AT1G29952	10491975	10494598	+	upstream	-863	661	Upstream
MYC2_2134.AT1G30016	chr1	10520983	10521459	477	*	311	9.17135	31.1051	28.79	MYC2_2134	AT1G30016	10521120	10521215	-	includeFeature	232	137	Upstream
MYC2_2135.AT1G30016	chr1	10521779	10521963	185	*	21	2.03808	2.15698	0.872271	MYC2_2135	AT1G30016	10521120	10521215	-	upstream	-564	564	Upstream
MYC2_2137.AT1G30030	chr1	10530831	10531015	185	*	31	2.44569	3.12521	1.71436	MYC2_2137	AT1G30030	10531831	10534842	+	upstream	-1000	816	Upstream
MYC2_2139.AT1G30040	chr1	10536953	10537684	732	*	88	4.27996	8.89315	7.10093	MYC2_2139	AT1G30040	10537648	10539831	+	overlapStart	-695	36	Upstream
MYC2_2142.AT1G30050	chr1	10542108	10542429	322	*	88	4.27996	8.89315	7.10093	MYC2_2142	AT1G30050	10543022	10544591	+	upstream	-914	593	Upstream
MYC2_2143.AT1G30090	chr1	10561273	10561597	325	*	60	3.46473	6.08252	4.43613	MYC2_2143	AT1G30090	10559561	10561423	-	overlapStart	150	150	Upstream
MYC2_2144.AT1G30100	chr1	10570954	10571197	244	*	42	2.85331	4.2239	2.70893	MYC2_2144	AT1G30100	10571340	10573365	+	upstream	-386	143	Upstream
MYC2_2149.AT1G30110	chr1	10581179	10582267	1089	*	387	10.598	38.7966	36.3889	MYC2_2149	AT1G30110	10581735	10584080	+	overlapStart	-556	532	Upstream
MYC2_2150.AT1G30120	chr1	10586454	10587777	1324	*	413	9.72405	41.3164	38.8842	MYC2_2150	AT1G30120	10584160	10586635	-	overlapStart	181	181	Upstream
MYC2_2150.AT1G30130	chr1	10586454	10587777	1324	*	413	9.72405	41.3164	38.8842	MYC2_2150	AT1G30130	10587602	10589760	+	overlapStart	-1148	175	Upstream
MYC2_2152.AT1G30135	chr1	10595647	10596772	1126	*	2514	39.9463	251.402	246.388	MYC2_2152	AT1G30135	10596492	10597239	+	overlapStart	-845	280	Upstream
MYC2_2153.AT1G30190	chr1	10618664	10618871	208	*	36	2.48583	3.61458	2.18433	MYC2_2153	AT1G30190	10618966	10619802	+	upstream	-302	95	Upstream
MYC2_2157.AT1G30220	chr1	10635858	10636091	234	*	67	3.66854	6.75201	5.06605	MYC2_2157	AT1G30220	10632821	10635471	-	upstream	-387	387	Upstream
MYC2_2159.AT1G30250	chr1	10647773	10648070	298	*	36	2.6495	3.65933	2.19401	MYC2_2159	AT1G30250	10646987	10647511	-	upstream	-262	262	Upstream
MYC2_2165.AT1G30270	chr1	10653966	10654173	208	*	17	1.83427	1.72792	0.517312	MYC2_2165	AT1G30270	10654857	10658897	+	upstream	-891	684	Upstream
MYC2_2166.AT1G30282	chr1	10662649	10662833	185	*	26	2.24189	2.62363	1.2736	MYC2_2166	AT1G30282	10663332	10664763	+	upstream	-683	499	Upstream
MYC2_2167.AT1G30280	chr1	10664518	10664768	251	*	48	3.05712	4.81704	3.25478	MYC2_2167	AT1G30280	10662663	10664668	-	overlapStart	150	100	Upstream
MYC2_2171.AT1G30290	chr1	10672785	10673047	263	*	66	3.32999	6.6741	5.01499	MYC2_2171	AT1G30290	10670320	10672740	-	upstream	-45	45	Upstream
MYC2_2171.AT1G30300	chr1	10672785	10673047	263	*	66	3.32999	6.6741	5.01499	MYC2_2171	AT1G30300	10672998	10675368	+	overlapStart	-213	49	Upstream
MYC2_2172.AT1G30310	chr1	10676862	10677905	1044	*	1061	21.196	106.146	103.025	MYC2_2172	AT1G30310	10675489	10675935	-	upstream	-927	927	Upstream
MYC2_2174.AT1G30320	chr1	10679814	10680239	426	*	128	5.299	12.8481	10.9066	MYC2_2174	AT1G30320	10680246	10682954	+	upstream	-432	7	Upstream
MYC2_2177.AT1G30330	chr1	10690507	10692131	1625	*	219	7.33708	21.9141	19.747	MYC2_2177	AT1G30330	10685822	10690838	-	overlapStart	331	331	Upstream
MYC2_2179.AT1G30340	chr1	10695696	10696707	1012	*	81	4.07615	8.15838	6.39981	MYC2_2179	AT1G30340	10696999	10701393	+	upstream	-1303	292	Upstream
MYC2_2184.AT1G30350	chr1	10712258	10712935	678	*	26	2.24189	2.62363	1.2736	MYC2_2184	AT1G30350	10710079	10711664	-	upstream	-594	594	Upstream
MYC2_2186.AT1G30360	chr1	10715321	10715669	349	*	161	6.06583	16.1946	14.1685	MYC2_2186	AT1G30360	10715665	10718997	+	overlapStart	-344	4	Upstream
MYC2_2188.AT1G30380	chr1	10721772	10722187	416	*	168	5.97694	16.8057	14.759	MYC2_2188	AT1G30380	10722197	10723247	+	upstream	-425	10	Upstream
MYC2_2189.AT1G30390	chr1	10723011	10723499	489	*	21	2.03808	2.15698	0.872271	MYC2_2189	AT1G30390	10723454	10725016	+	overlapStart	-443	45	Upstream
MYC2_2190.AT1G30400	chr1	10726871	10727151	281	*	67	3.66854	6.75201	5.06605	MYC2_2190	AT1G30400	10727638	10738055	+	upstream	-767	487	Upstream
MYC2_2191.AT1G30410	chr1	10737825	10738245	421	*	107	4.68451	10.74	8.88027	MYC2_2191	AT1G30410	10738805	10747323	+	upstream	-980	560	Upstream
MYC2_2192.AT1G30410	chr1	10738631	10739023	393	*	64	3.52544	6.44422	4.79043	MYC2_2192	AT1G30410	10738805	10747323	+	overlapStart	-174	174	Upstream
MYC2_2193.AT1G30430	chr1	10756659	10756949	291	*	40	2.75493	4.0267	2.54899	MYC2_2193	AT1G30430	10756722	10756794	+	includeFeature	-63	63	Upstream
MYC2_2195.AT1G30470	chr1	10778960	10779233	274	*	228	7.54089	22.8919	20.7065	MYC2_2195	AT1G30470	10779171	10786697	+	overlapStart	-211	62	Upstream
MYC2_2199.AT1G30490	chr1	10801762	10802110	349	*	67	3.66854	6.75201	5.06605	MYC2_2199	AT1G30490	10796135	10800961	-	upstream	-801	801	Upstream
MYC2_2202.AT1G30500	chr1	10806435	10806667	233	*	52	3.09655	5.29063	3.71625	MYC2_2202	AT1G30500	10804450	10806319	-	upstream	-116	116	Upstream
MYC2_2203.AT1G30530	chr1	10813889	10814301	413	*	400	10.5815	40.0029	37.583	MYC2_2203	AT1G30530	10814659	10816583	+	upstream	-770	358	Upstream
MYC2_2205.AT1G30570	chr1	10828099	10828283	185	*	17	1.83427	1.72792	0.517312	MYC2_2205	AT1G30570	10828933	10831482	+	upstream	-834	650	Upstream
MYC2_2206.AT1G30590	chr1	10840816	10841128	313	*	26	2.15438	2.66975	1.31704	MYC2_2206	AT1G30590	10835794	10840005	-	upstream	-811	811	Upstream
MYC2_2207.AT1G30600	chr1	10845376	10845624	249	*	51	3.12454	5.15234	3.58226	MYC2_2207	AT1G30600	10841142	10845050	-	upstream	-326	326	Upstream
MYC2_2207.AT1G30610	chr1	10845376	10845624	249	*	51	3.12454	5.15234	3.58226	MYC2_2207	AT1G30610	10846513	10850628	+	upstream	-1137	889	Upstream
MYC2_2208.AT1G30600	chr1	10845942	10846464	523	*	53	3.21087	5.33312	3.75786	MYC2_2208	AT1G30600	10841142	10845050	-	upstream	-892	892	Upstream
MYC2_2208.AT1G30610	chr1	10845942	10846464	523	*	53	3.21087	5.33312	3.75786	MYC2_2208	AT1G30610	10846513	10850628	+	upstream	-571	49	Upstream
MYC2_2211.AT1G30620	chr1	10853863	10854288	426	*	31	2.44569	3.12521	1.71436	MYC2_2211	AT1G30620	10854549	10858244	+	upstream	-686	261	Upstream
MYC2_2212.AT1G30620	chr1	10854463	10854901	439	*	36	2.6495	3.65933	2.19401	MYC2_2212	AT1G30620	10854549	10858244	+	overlapStart	-86	86	Upstream
MYC2_2213.AT1G30630	chr1	10860377	10860673	297	*	64	3.31443	6.41664	4.76332	MYC2_2213	AT1G30630	10858298	10860261	-	upstream	-116	116	Upstream
MYC2_2213.AT1G30640	chr1	10860377	10860673	297	*	64	3.31443	6.41664	4.76332	MYC2_2213	AT1G30640	10860655	10864700	+	overlapStart	-278	18	Upstream
MYC2_2215.AT1G30690	chr1	10886340	10886693	354	*	31	2.44569	3.12521	1.71436	MYC2_2215	AT1G30690	10887607	10890332	+	upstream	-1267	914	Upstream
MYC2_2216.AT1G30690	chr1	10887254	10887762	509	*	198	6.87461	19.8637	17.7495	MYC2_2216	AT1G30690	10887607	10890332	+	overlapStart	-353	155	Upstream
MYC2_2218.AT1G30720	chr1	10897739	10897923	185	*	21	2.03808	2.15698	0.872271	MYC2_2218	AT1G30720	10898172	10899912	+	upstream	-433	249	Upstream
MYC2_2219.AT1G30730	chr1	10900302	10900602	301	*	26	2.24189	2.62363	1.2736	MYC2_2219	AT1G30730	10900854	10902534	+	upstream	-552	252	Upstream
MYC2_2221.AT1G30810	chr1	10942103	10942501	399	*	60	3.46473	6.08252	4.43613	MYC2_2221	AT1G30810	10936765	10942292	-	overlapStart	189	189	Upstream
MYC2_2225.AT1G30825	chr1	10959690	10960188	499	*	433	11.4132	43.377	40.9232	MYC2_2225	AT1G30825	10960941	10963182	+	upstream	-1251	753	Upstream
MYC2_2226.AT1G30825	chr1	10960360	10960544	185	*	26	2.24189	2.62363	1.2736	MYC2_2226	AT1G30825	10960941	10963182	+	upstream	-581	397	Upstream
MYC2_2227.AT1G30830	chr1	10963531	10963793	263	*	42	2.85331	4.2239	2.70893	MYC2_2227	AT1G30830	10963573	10963646	-	includeFeature	115	42	Upstream
MYC2_2230.AT1G31030	chr1	11067423	11067991	569	*	95	4.44828	9.56858	7.76539	MYC2_2230	AT1G31030	11064583	11067201	-	upstream	-222	222	Upstream
MYC2_2233.AT1G31110	chr1	11104034	11104305	272	*	65	3.39089	6.5991	4.94124	MYC2_2233	AT1G31110	11104113	11104186	+	includeFeature	-79	79	Upstream
MYC2_2236.AT1G31130	chr1	11116021	11116322	302	*	81	4.07615	8.15838	6.39981	MYC2_2236	AT1G31130	11114701	11116195	-	overlapStart	174	127	Upstream
MYC2_2239.AT1G31173	chr1	11136230	11136645	416	*	112	4.89139	11.2129	9.32726	MYC2_2239	AT1G31173	11137365	11138969	+	upstream	-1135	720	Upstream
MYC2_2240.AT1G31173	chr1	11137184	11137408	225	*	67	3.66854	6.75201	5.06605	MYC2_2240	AT1G31173	11137365	11138969	+	overlapStart	-181	43	Upstream
MYC2_2243.AT1G31230	chr1	11163668	11164069	402	*	22	1.93611	2.21883	0.9314	MYC2_2243	AT1G31230	11158618	11163274	-	upstream	-394	394	Upstream
MYC2_2244.AT1G31240	chr1	11165007	11165430	424	*	154	5.91042	15.4207	13.4024	MYC2_2244	AT1G31240	11163858	11164928	-	upstream	-79	79	Upstream
MYC2_2245.AT1G31290	chr1	11187835	11188181	347	*	48	3.05712	4.81704	3.25478	MYC2_2245	AT1G31290	11188293	11192317	+	upstream	-458	112	Upstream
MYC2_2246.AT1G31300	chr1	11192808	11193078	271	*	42	2.85331	4.2239	2.70893	MYC2_2246	AT1G31300	11193635	11196312	+	upstream	-827	557	Upstream
MYC2_2250.AT1G31319	chr1	11212670	11213057	388	*	96	4.48377	9.64772	7.82338	MYC2_2250	AT1G31319	11211807	11211914	-	upstream	-756	756	Upstream
MYC2_2250.AT1G31320	chr1	11212670	11213057	388	*	96	4.48377	9.64772	7.82338	MYC2_2250	AT1G31320	11213017	11214382	+	overlapStart	-347	40	Upstream
MYC2_2252.AT1G31335	chr1	11217068	11217785	718	*	26	2.23101	2.60369	1.2736	MYC2_2252	AT1G31335	11216914	11217393	-	overlapStart	325	154	Upstream
MYC2_2253.AT1G31340	chr1	11219896	11220852	957	*	126	4.80593	12.6976	10.7757	MYC2_2253	AT1G31340	11217845	11219458	-	upstream	-438	438	Upstream
MYC2_2255.AT1G31350	chr1	11222410	11223032	623	*	120	5.09519	12.0221	10.1079	MYC2_2255	AT1G31350	11221335	11222786	-	overlapStart	376	246	Upstream
MYC2_2256.AT1G31350	chr1	11223642	11223918	277	*	60	3.46473	6.08252	4.43613	MYC2_2256	AT1G31350	11221335	11222786	-	upstream	-856	856	Upstream
MYC2_2260.AT1G31355	chr1	11227453	11228994	1542	*	258	8.15231	25.893	23.6554	MYC2_2260	AT1G31355	11228988	11229990	+	overlapStart	-1535	6	Upstream
MYC2_2261.AT1G31358	chr1	11230925	11231446	522	*	731	16.3046	73.1861	70.4785	MYC2_2261	AT1G31358	11230463	11230612	-	upstream	-313	313	Upstream
MYC2_2261.AT1G31360	chr1	11230925	11231446	522	*	731	16.3046	73.1861	70.4785	MYC2_2261	AT1G31360	11232333	11237530	+	upstream	-1408	887	Upstream
MYC2_2262.AT1G31410	chr1	11249489	11249689	201	*	25	2.16652	2.58928	1.2736	MYC2_2262	AT1G31410	11246914	11249359	-	upstream	-130	130	Upstream
MYC2_2262.AT1G31420	chr1	11249489	11249689	201	*	25	2.16652	2.58928	1.2736	MYC2_2262	AT1G31420	11249600	11253915	+	overlapStart	-111	89	Upstream
MYC2_2263.AT1G31440	chr1	11258782	11259069	288	*	124	5.14274	12.4871	10.5678	MYC2_2263	AT1G31440	11255836	11258715	-	upstream	-67	67	Upstream
MYC2_2264.AT1G31470	chr1	11265593	11265895	303	*	29	2.33087	2.90649	1.54368	MYC2_2264	AT1G31470	11262918	11264963	-	upstream	-630	630	Upstream
MYC2_2264.AT1G31480	chr1	11265593	11265895	303	*	29	2.33087	2.90649	1.54368	MYC2_2264	AT1G31480	11265880	11271701	+	overlapStart	-287	15	Upstream
MYC2_2266.AT1G31500	chr1	11277275	11277494	220	*	41	2.73225	4.1433	2.66145	MYC2_2266	AT1G31500	11273605	11276577	-	upstream	-698	698	Upstream
MYC2_2266.AT1G31510	chr1	11277275	11277494	220	*	41	2.73225	4.1433	2.66145	MYC2_2266	AT1G31510	11277417	11278462	+	overlapStart	-142	77	Upstream
MYC2_2267.AT1G31540	chr1	11293765	11294212	448	*	57	3.19941	5.72257	4.11041	MYC2_2267	AT1G31540	11288452	11293753	-	upstream	-12	12	Upstream
MYC2_2269.AT1G31550	chr1	11297099	11297782	684	*	641	14.878	64.1222	61.4947	MYC2_2269	AT1G31550	11295525	11297379	-	overlapStart	280	280	Upstream
MYC2_2273.AT1G31650	chr1	11330655	11330999	345	*	60	3.43731	6.02474	4.40468	MYC2_2273	AT1G31650	11326301	11330738	-	overlapStart	83	83	Upstream
MYC2_2274.AT1G31660	chr1	11333775	11334018	244	*	60	3.46473	6.08252	4.43613	MYC2_2274	AT1G31660	11330956	11333540	-	upstream	-235	235	Upstream
MYC2_2275.AT1G31670	chr1	11336922	11337106	185	*	21	2.03808	2.15698	0.872271	MYC2_2275	AT1G31670	11337558	11341889	+	upstream	-636	452	Upstream
MYC2_2276.AT1G31710	chr1	11349597	11349868	272	*	81	4.07615	8.15838	6.39981	MYC2_2276	AT1G31710	11349840	11355486	+	overlapStart	-243	28	Upstream
MYC2_2280.AT1G31730	chr1	11359438	11359787	350	*	217	7.279	21.7747	19.621	MYC2_2280	AT1G31730	11359642	11364288	+	overlapStart	-204	145	Upstream
MYC2_2281.AT1G31760	chr1	11374217	11374997	781	*	192	6.1317	19.2921	17.1829	MYC2_2281	AT1G31760	11372425	11373483	-	upstream	-734	734	Upstream
MYC2_2284.AT1G31780	chr1	11390013	11390348	336	*	48	3.05712	4.81704	3.25478	MYC2_2284	AT1G31780	11391227	11394748	+	upstream	-1214	879	Upstream
MYC2_2285.AT1G31790	chr1	11396068	11396308	241	*	76	3.74569	7.67745	5.95058	MYC2_2285	AT1G31790	11394690	11396018	-	upstream	-50	50	Upstream
MYC2_2285.AT1G31800	chr1	11396068	11396308	241	*	76	3.74569	7.67745	5.95058	MYC2_2285	AT1G31800	11396402	11399714	+	upstream	-334	94	Upstream
MYC2_2287.AT1G31830	chr1	11420775	11420997	223	*	39	2.70881	3.93346	2.45969	MYC2_2287	AT1G31830	11418625	11420837	-	overlapStart	62	62	Upstream
MYC2_2288.AT1G31830	chr1	11421426	11421979	554	*	338	9.37187	33.8995	31.5537	MYC2_2288	AT1G31830	11418625	11420837	-	upstream	-589	589	Upstream
MYC2_2289.AT1G31835	chr1	11423800	11423989	190	*	25	2.16946	2.595	1.2736	MYC2_2289	AT1G31835	11423059	11423684	-	upstream	-116	116	Upstream
MYC2_2289.AT1G31840	chr1	11423800	11423989	190	*	25	2.16946	2.595	1.2736	MYC2_2289	AT1G31840	11423906	11426714	+	overlapStart	-106	83	Upstream
MYC2_2293.AT1G31880	chr1	11444637	11445552	916	*	365	10.1904	36.5553	34.1722	MYC2_2293	AT1G31880	11445490	11450189	+	overlapStart	-853	62	Upstream
MYC2_2298.AT1G31920	chr1	11463749	11463951	203	*	59	3.2787	5.90079	4.28425	MYC2_2298	AT1G31920	11461855	11463848	-	overlapStart	99	99	Upstream
MYC2_2299.AT1G31920	chr1	11464435	11464966	532	*	51	3.12759	5.15877	3.58862	MYC2_2299	AT1G31920	11461855	11463848	-	upstream	-587	587	Upstream
MYC2_2299.AT1G31930	chr1	11464435	11464966	532	*	51	3.12759	5.15877	3.58862	MYC2_2299	AT1G31930	11464985	11469185	+	upstream	-550	19	Upstream
MYC2_2301.AT1G31940	chr1	11471720	11471957	238	*	31	2.44569	3.12521	1.71436	MYC2_2301	AT1G31940	11470056	11471340	-	upstream	-380	380	Upstream
MYC2_2305.AT1G32060	chr1	11531307	11531593	287	*	42	2.85331	4.2239	2.70893	MYC2_2305	AT1G32060	11532533	11534639	+	upstream	-1226	940	Upstream
MYC2_2306.AT1G32060	chr1	11531858	11532117	260	*	48	2.88226	4.81276	3.25478	MYC2_2306	AT1G32060	11532533	11534639	+	upstream	-675	416	Upstream
MYC2_2311.AT1G32170	chr1	11575185	11575577	393	*	60	3.46473	6.08252	4.43613	MYC2_2311	AT1G32170	11575320	11577927	+	overlapStart	-135	135	Upstream
MYC2_2313.AT1G32172	chr1	11577881	11578108	228	*	17	1.83427	1.72792	0.517312	MYC2_2313	AT1G32172	11578506	11580547	+	upstream	-625	398	Upstream
MYC2_2314.AT1G32190	chr1	11595840	11596150	311	*	25	2.10688	2.57226	1.26475	MYC2_2314	AT1G32190	11592955	11595982	-	overlapStart	142	142	Upstream
MYC2_2319.AT1G32200	chr1	11604868	11605882	1015	*	137	5.36619	13.7455	11.7769	MYC2_2319	AT1G32200	11601781	11605060	-	overlapStart	192	192	Upstream
MYC2_2320.AT1G32230	chr1	11611799	11612185	387	*	169	6.05087	16.9887	14.9405	MYC2_2320	AT1G32230	11612118	11616218	+	overlapStart	-319	67	Upstream
MYC2_2328.AT1G32240	chr1	11630549	11630861	313	*	42	2.85331	4.2239	2.70893	MYC2_2328	AT1G32240	11625700	11630626	-	overlapStart	77	77	Upstream
MYC2_2329.AT1G32240	chr1	11631437	11631749	313	*	31	2.44569	3.12521	1.71436	MYC2_2329	AT1G32240	11625700	11630626	-	upstream	-811	811	Upstream
MYC2_2330.AT1G32300	chr1	11649936	11650399	464	*	48	3.05712	4.81704	3.25478	MYC2_2330	AT1G32300	11651342	11653365	+	upstream	-1406	943	Upstream
MYC2_2331.AT1G32330	chr1	11660412	11660607	196	*	31	2.44569	3.12521	1.71436	MYC2_2331	AT1G32330	11656986	11660376	-	upstream	-36	36	Upstream
MYC2_2332.AT1G32350	chr1	11668660	11669040	381	*	480	12.2285	48.0802	45.5838	MYC2_2332	AT1G32350	11666977	11668690	-	overlapStart	30	30	Upstream
MYC2_2335.AT1G32380	chr1	11681332	11681737	406	*	157	5.87286	15.7367	13.7155	MYC2_2335	AT1G32380	11681752	11684478	+	upstream	-420	15	Upstream
MYC2_2336.AT1G32385	chr1	11684230	11684705	476	*	21	2.03808	2.15698	0.872271	MYC2_2336	AT1G32385	11685060	11685144	+	upstream	-830	355	Upstream
MYC2_2337.AT1G32400	chr1	11691503	11691806	304	*	111	4.85267	11.1252	9.25964	MYC2_2337	AT1G32400	11689106	11691531	-	overlapStart	28	28	Upstream
MYC2_2339.AT1G32450	chr1	11719862	11720234	373	*	26	2.24189	2.62363	1.2736	MYC2_2339	AT1G32450	11715150	11719970	-	overlapStart	108	108	Upstream
MYC2_2341.AT1G32460	chr1	11737961	11738273	313	*	279	8.55993	27.9475	25.6778	MYC2_2341	AT1G32460	11738118	11739326	+	overlapStart	-157	155	Upstream
MYC2_2342.AT1G32500	chr1	11751940	11752264	325	*	33	2.411	3.31961	1.90227	MYC2_2342	AT1G32500	11749823	11752106	-	overlapStart	166	158	Upstream
MYC2_2342.AT1G32505	chr1	11751940	11752264	325	*	33	2.411	3.31961	1.90227	MYC2_2342	AT1G32505	11753254	11754123	+	upstream	-1314	990	Upstream
MYC2_2343.AT1G32530	chr1	11763223	11763931	709	*	112	4.62137	11.2383	9.3519	MYC2_2343	AT1G32530	11759459	11762607	-	upstream	-616	616	Upstream
MYC2_2345.AT1G32540	chr1	11766480	11766697	218	*	60	3.46473	6.08252	4.43613	MYC2_2345	AT1G32540	11767504	11769898	+	upstream	-1024	807	Upstream
MYC2_2346.AT1G32540	chr1	11767378	11768026	649	*	705	15.897	70.5684	67.8844	MYC2_2346	AT1G32540	11767504	11769898	+	overlapStart	-126	126	Upstream
MYC2_2349.AT1G32550	chr1	11774273	11774517	245	*	45	2.68076	4.51078	2.98808	MYC2_2349	AT1G32550	11771766	11774187	-	upstream	-86	86	Upstream
MYC2_2349.AT1G32560	chr1	11774273	11774517	245	*	45	2.68076	4.51078	2.98808	MYC2_2349	AT1G32560	11774484	11775279	+	overlapStart	-211	33	Upstream
MYC2_2350.AT1G32550	chr1	11775043	11775363	321	*	31	2.3201	3.12817	1.71672	MYC2_2350	AT1G32550	11771766	11774187	-	upstream	-856	856	Upstream
MYC2_2351.AT1G32640	chr1	11799079	11801327	2249	*	1047	20.9922	104.721	101.625	MYC2_2351	AT1G32640	11798810	11800988	-	overlapStart	1909	269	Upstream
MYC2_2352.AT1G32640	chr1	11801543	11802090	548	*	578	13.8589	57.8236	55.2477	MYC2_2352	AT1G32640	11798810	11800988	-	upstream	-555	555	Upstream
MYC2_2357.AT1G32660	chr1	11809561	11810462	902	*	1133	22.215	113.335	110.067	MYC2_2357	AT1G32660	11811040	11812380	+	upstream	-1479	578	Upstream
MYC2_2359.AT1G32690	chr1	11821570	11822033	464	*	272	8.2648	27.2214	24.965	MYC2_2359	AT1G32690	11820908	11821710	-	overlapStart	140	140	Upstream
MYC2_2360.AT1G32690	chr1	11822642	11823037	396	*	258	8.15231	25.893	23.6554	MYC2_2360	AT1G32690	11820908	11821710	-	upstream	-932	932	Upstream
MYC2_2362.AT1G32700	chr1	11826889	11827076	188	*	36	2.6495	3.65933	2.19401	MYC2_2362	AT1G32700	11827433	11829759	+	upstream	-544	357	Upstream
MYC2_2363.AT1G32700	chr1	11827181	11827786	606	*	161	6.06583	16.1946	14.1685	MYC2_2363	AT1G32700	11827433	11829759	+	overlapStart	-252	252	Upstream
MYC2_2366.AT1G32710	chr1	11832790	11833023	234	*	53	3.23511	5.38355	3.80647	MYC2_2366	AT1G32710	11833113	11833706	+	upstream	-323	90	Upstream
MYC2_2367.AT1G32713	chr1	11834142	11834326	185	*	36	2.6495	3.65933	2.19401	MYC2_2367	AT1G32713	11834068	11834180	-	overlapStart	38	38	Upstream
MYC2_2367.AT1G32720	chr1	11834142	11834326	185	*	36	2.6495	3.65933	2.19401	MYC2_2367	AT1G32720	11834902	11836631	+	upstream	-760	576	Upstream
MYC2_2368.AT1G32730	chr1	11840235	11840435	201	*	26	2.24189	2.62363	1.2736	MYC2_2368	AT1G32730	11840910	11843257	+	upstream	-675	475	Upstream
MYC2_2369.AT1G32730	chr1	11840779	11841057	279	*	118	4.50143	11.886	9.9919	MYC2_2369	AT1G32730	11840910	11843257	+	overlapStart	-131	131	Upstream
MYC2_2372.AT1G32760	chr1	11857807	11858306	500	*	181	6.52185	18.1248	16.038	MYC2_2372	AT1G32760	11858211	11859292	+	overlapStart	-404	95	Upstream
MYC2_2373.AT1G32770	chr1	11867696	11867977	282	*	36	2.6495	3.65933	2.19401	MYC2_2373	AT1G32770	11865343	11866950	-	upstream	-746	746	Upstream
MYC2_2375.AT1G32780	chr1	11872823	11873220	398	*	25	2.22414	2.59108	1.2736	MYC2_2375	AT1G32780	11869825	11872926	-	overlapStart	103	103	Upstream
MYC2_2377.AT1G32860	chr1	11909290	11909833	544	*	31	2.44569	3.12521	1.71436	MYC2_2377	AT1G32860	11907109	11908928	-	upstream	-362	362	Upstream
MYC2_2378.AT1G32900	chr1	11923695	11924538	844	*	178	6.04334	17.8008	15.7308	MYC2_2378	AT1G32900	11920390	11923766	-	overlapStart	71	71	Upstream
MYC2_2378.AT1G32910	chr1	11923695	11924538	844	*	178	6.04334	17.8008	15.7308	MYC2_2378	AT1G32910	11925426	11926908	+	upstream	-1731	888	Upstream
MYC2_2379.AT1G32910	chr1	11924940	11925385	446	*	565	13.6551	56.5825	54.0171	MYC2_2379	AT1G32910	11925426	11926908	+	upstream	-486	41	Upstream
MYC2_2380.AT1G32920	chr1	11927280	11930595	3316	*	1075	21.3998	107.576	104.428	MYC2_2380	AT1G32920	11928807	11929302	+	includeFeature	-1527	1293	Upstream
MYC2_2380.AT1G32928	chr1	11927280	11930595	3316	*	1075	21.3998	107.576	104.428	MYC2_2380	AT1G32928	11931203	11931801	+	upstream	-3923	608	Upstream
MYC2_2381.AT1G32928	chr1	11930886	11931378	493	*	258	8.15231	25.893	23.6554	MYC2_2381	AT1G32928	11931203	11931801	+	overlapStart	-317	175	Upstream
MYC2_2382.AT1G32970	chr1	11952244	11952466	223	*	48	3.05314	4.80896	3.25478	MYC2_2382	AT1G32970	11948721	11951982	-	upstream	-262	262	Upstream
MYC2_2382.AT1G32975	chr1	11952244	11952466	223	*	48	3.05314	4.80896	3.25478	MYC2_2382	AT1G32975	11953089	11953899	+	upstream	-845	623	Upstream
MYC2_2383.AT1G33055	chr1	11973352	11973627	276	*	36	2.6495	3.65933	2.19401	MYC2_2383	AT1G33055	11971308	11972578	-	upstream	-774	774	Upstream
MYC2_2384.AT1G33060	chr1	11978474	11979486	1013	*	364	9.66341	36.4095	34.0351	MYC2_2384	AT1G33060	11975340	11978521	-	overlapStart	47	47	Upstream
MYC2_2385.AT1G33110	chr1	12004451	12004699	249	*	48	3.05712	4.81704	3.25478	MYC2_2385	AT1G33110	12004927	12008833	+	upstream	-476	228	Upstream
MYC2_2390.AT1G33120	chr1	12010418	12010951	534	*	65	3.45059	6.51035	4.85488	MYC2_2390	AT1G33120	12010901	12012524	+	overlapStart	-483	50	Upstream
MYC2_2393.AT1G33140	chr1	12022893	12023347	455	*	56	3.07928	5.64621	4.0356	MYC2_2393	AT1G33140	12023275	12024783	+	overlapStart	-382	72	Upstream
MYC2_2394.AT1G33160	chr1	12023514	12023971	458	*	42	2.63877	4.25377	2.73819	MYC2_2394	AT1G33160	12024806	12025328	+	upstream	-1292	835	Upstream
MYC2_2395.AT1G33160	chr1	12024600	12024912	313	*	34	2.33557	3.40898	1.98755	MYC2_2395	AT1G33160	12024806	12025328	+	overlapStart	-206	106	Upstream
MYC2_2396.AT1G33170	chr1	12026437	12027023	587	*	36	2.6495	3.65933	2.19401	MYC2_2396	AT1G33170	12027084	12030539	+	upstream	-647	61	Upstream
MYC2_2397.AT1G33200	chr1	12040570	12040792	223	*	54	3.26092	5.43708	3.83145	MYC2_2397	AT1G33200	12041779	12044690	+	upstream	-1209	987	Upstream
MYC2_2399.AT1G33230	chr1	12046362	12046719	358	*	109	4.15078	10.9124	9.05033	MYC2_2399	AT1G33230	12046641	12050066	+	overlapStart	-279	78	Upstream
MYC2_2401.AT1G33240	chr1	12054488	12055376	889	*	36	2.6495	3.65933	2.19401	MYC2_2401	AT1G33240	12051471	12054546	-	overlapStart	58	58	Upstream
MYC2_2403.AT1G33250	chr1	12059449	12060028	580	*	135	5.45925	13.5896	11.6398	MYC2_2403	AT1G33250	12057250	12059485	-	overlapStart	36	36	Upstream
MYC2_2405.AT1G33260	chr1	12063990	12064517	528	*	238	7.74469	23.8811	21.6779	MYC2_2405	AT1G33260	12064509	12066376	+	overlapStart	-519	8	Upstream
MYC2_2406.AT1G33330	chr1	12083799	12084009	211	*	36	2.6495	3.65933	2.19401	MYC2_2406	AT1G33330	12084951	12086528	+	upstream	-1152	942	Upstream
MYC2_2407.AT1G33350	chr1	12091540	12092142	603	*	81	3.969	8.19501	6.43608	MYC2_2407	AT1G33350	12089403	12091687	-	overlapStart	147	147	Upstream
MYC2_2407.AT1G33360	chr1	12091540	12092142	603	*	81	3.969	8.19501	6.43608	MYC2_2407	AT1G33360	12091877	12096025	+	overlapStart	-337	265	Upstream
MYC2_2408.AT1G33420	chr1	12123472	12123891	420	*	55	3.12387	5.55109	3.94284	MYC2_2408	AT1G33420	12120886	12123576	-	overlapStart	104	104	Upstream
MYC2_2409.AT1G33450	chr1	12138538	12138892	355	*	203	6.88733	20.3551	18.2246	MYC2_2409	AT1G33450	12139228	12139780	+	upstream	-690	336	Upstream
MYC2_2410.AT1G33490	chr1	12152330	12152579	250	*	49	2.95311	4.97218	3.40639	MYC2_2410	AT1G33490	12150690	12152394	-	overlapStart	64	64	Upstream
MYC2_2410.AT1G33500	chr1	12152330	12152579	250	*	49	2.95311	4.97218	3.40639	MYC2_2410	AT1G33500	12152573	12154715	+	overlapStart	-243	6	Upstream
MYC2_2411.AT1G33550	chr1	12167098	12167324	227	*	31	2.44569	3.12521	1.71436	MYC2_2411	AT1G33550	12166398	12166621	-	upstream	-477	477	Upstream
MYC2_2412.AT1G33550	chr1	12167518	12168393	876	*	81	4.07615	8.15838	6.39981	MYC2_2412	AT1G33550	12166398	12166621	-	upstream	-897	897	Upstream
MYC2_2412.AT1G33560	chr1	12167518	12168393	876	*	81	4.07615	8.15838	6.39981	MYC2_2412	AT1G33560	12168768	12172005	+	upstream	-1250	375	Upstream
MYC2_2413.AT1G33560	chr1	12168719	12168949	231	*	31	2.44569	3.12521	1.71436	MYC2_2413	AT1G33560	12168768	12172005	+	overlapStart	-49	49	Upstream
MYC2_2414.AT1G33590	chr1	12177447	12177920	474	*	541	12.9903	54.1723	51.626	MYC2_2414	AT1G33590	12177777	12179413	+	overlapStart	-330	143	Upstream
MYC2_2415.AT1G33600	chr1	12180475	12181022	548	*	330	9.50314	33.0711	30.7373	MYC2_2415	AT1G33600	12180776	12182363	+	overlapStart	-301	246	Upstream
MYC2_2418.AT1G33607	chr1	12188347	12188977	631	*	784	17.1199	78.4856	75.7283	MYC2_2418	AT1G33607	12187018	12187423	-	upstream	-924	924	Upstream
MYC2_2418.AT1G33610	chr1	12188347	12188977	631	*	784	17.1199	78.4856	75.7283	MYC2_2418	AT1G33610	12188910	12190418	+	overlapStart	-563	67	Upstream
MYC2_2419.AT1G33760	chr1	12237204	12237406	203	*	36	2.6495	3.65933	2.19401	MYC2_2419	AT1G33760	12237878	12238598	+	upstream	-674	472	Upstream
MYC2_2420.AT1G33760	chr1	12237563	12237788	226	*	42	2.85331	4.2239	2.70893	MYC2_2420	AT1G33760	12237878	12238598	+	upstream	-315	90	Upstream
MYC2_2423.AT1G33810	chr1	12264621	12264920	300	*	20	1.96781	2.03287	0.801698	MYC2_2423	AT1G33810	12265033	12266847	+	upstream	-412	113	Upstream
MYC2_2426.AT1G33990	chr1	12355055	12355818	764	*	43	2.84713	4.38452	2.86555	MYC2_2426	AT1G33990	12355568	12358031	+	overlapStart	-513	250	Upstream
MYC2_2427.AT1G34044	chr1	12385915	12386099	185	*	26	2.24189	2.62363	1.2736	MYC2_2427	AT1G34044	12386219	12387342	+	upstream	-304	120	Upstream
MYC2_2429.AT1G34200	chr1	12455525	12455759	235	*	31	2.44569	3.12521	1.71436	MYC2_2429	AT1G34200	12455708	12457412	+	overlapStart	-183	51	Upstream
MYC2_2430.AT1G34210	chr1	12458342	12458978	637	*	399	10.8018	39.9297	37.5101	MYC2_2430	AT1G34210	12458670	12462905	+	overlapStart	-328	308	Upstream
MYC2_2431.AT1G34245	chr1	12471826	12472234	409	*	71	3.73884	7.15378	5.4603	MYC2_2431	AT1G34245	12472868	12473754	+	upstream	-1042	634	Upstream
MYC2_2432.AT1G34245	chr1	12472568	12473260	693	*	67	3.66854	6.75201	5.06605	MYC2_2432	AT1G34245	12472868	12473754	+	overlapStart	-300	300	Upstream
MYC2_2435.AT1G34270	chr1	12494961	12495157	197	*	36	2.6495	3.65933	2.19401	MYC2_2435	AT1G34270	12492411	12494544	-	upstream	-417	417	Upstream
MYC2_2436.AT1G34315	chr1	12516781	12517163	383	*	74	3.87235	7.44433	5.72108	MYC2_2436	AT1G34315	12514106	12516521	-	upstream	-260	260	Upstream
MYC2_2437.AT1G34315	chr1	12517291	12517643	353	*	21	2.03808	2.15698	0.872271	MYC2_2437	AT1G34315	12514106	12516521	-	upstream	-770	770	Upstream
MYC2_2440.AT1G34320	chr1	12519077	12519443	367	*	17	1.83427	1.72792	0.517312	MYC2_2440	AT1G34320	12520179	12524370	+	upstream	-1102	736	Upstream
MYC2_2441.AT1G34350	chr1	12534317	12534508	192	*	60	3.44968	6.05083	4.43026	MYC2_2441	AT1G34350	12534426	12536095	+	overlapStart	-109	82	Upstream
MYC2_2444.AT1G34370	chr1	12549890	12550562	673	*	37	2.48355	3.74878	2.28033	MYC2_2444	AT1G34370	12550446	12552699	+	overlapStart	-556	116	Upstream
MYC2_2447.AT1G34419	chr1	12584092	12584609	518	*	352	9.90753	35.2518	32.891	MYC2_2447	AT1G34419	12583039	12583206	-	upstream	-886	886	Upstream
MYC2_2447.AT1G34420	chr1	12584092	12584609	518	*	352	9.90753	35.2518	32.891	MYC2_2447	AT1G34420	12584587	12587570	+	overlapStart	-495	22	Upstream
MYC2_2448.AT1G34430	chr1	12590055	12590274	220	*	16	1.73548	1.61983	0.470581	MYC2_2448	AT1G34430	12587752	12590192	-	overlapStart	137	82	Upstream
MYC2_2449.AT1G34640	chr1	12688534	12688866	333	*	74	3.87235	7.44433	5.72108	MYC2_2449	AT1G34640	12687552	12688543	-	overlapStart	9	9	Upstream
MYC2_2450.AT1G34780	chr1	12750471	12750856	386	*	54	3.26092	5.43708	3.83145	MYC2_2450	AT1G34780	12748571	12750383	-	upstream	-88	88	Upstream
MYC2_2450.AT1G34844	chr1	12750471	12750856	386	*	54	3.26092	5.43708	3.83145	MYC2_2450	AT1G34844	12751268	12752617	+	upstream	-797	412	Upstream
MYC2_2451.AT1G35150	chr1	12866845	12867265	421	*	181	6.52185	18.1248	16.038	MYC2_2451	AT1G35150	12864158	12866238	-	upstream	-607	607	Upstream
MYC2_2451.AT1G35160	chr1	12866845	12867265	421	*	181	6.52185	18.1248	16.038	MYC2_2451	AT1G35160	12867126	12868890	+	overlapStart	-281	139	Upstream
MYC2_2452.AT1G35180	chr1	12878714	12878947	234	*	26	2.24189	2.62363	1.2736	MYC2_2452	AT1G35180	12877107	12878719	-	overlapStart	5	5	Upstream
MYC2_2452.AT1G35181	chr1	12878714	12878947	234	*	26	2.24189	2.62363	1.2736	MYC2_2452	AT1G35181	12879306	12879470	+	upstream	-592	359	Upstream
MYC2_2455.AT1G35255	chr1	12936493	12936677	185	*	21	2.03808	2.15698	0.872271	MYC2_2455	AT1G35255	12935647	12936553	-	overlapStart	60	60	Upstream
MYC2_2456.AT1G35260	chr1	12937797	12937981	185	*	26	2.24189	2.62363	1.2736	MYC2_2456	AT1G35260	12936849	12937787	-	upstream	-10	10	Upstream
MYC2_2459.AT1G35350	chr1	12984593	12984920	328	*	154	5.91042	15.4207	13.4024	MYC2_2459	AT1G35350	12981251	12984583	-	upstream	-10	10	Upstream
MYC2_2462.AT1G35430	chr1	13030885	13031670	786	*	95	4.16515	9.50283	7.70169	MYC2_2462	AT1G35430	13030553	13031152	-	overlapStart	267	267	Upstream
MYC2_2463.AT1G35440	chr1	13036724	13036918	195	*	26	2.24189	2.62363	1.2736	MYC2_2463	AT1G35440	13035294	13036037	-	upstream	-687	687	Upstream
MYC2_2465.AT1G35450	chr1	13039566	13039937	372	*	36	2.48583	3.61458	2.18433	MYC2_2465	AT1G35450	13037410	13038752	-	upstream	-814	814	Upstream
MYC2_2465.AT1G35460	chr1	13039566	13039937	372	*	36	2.48583	3.61458	2.18433	MYC2_2465	AT1G35460	13039916	13042102	+	overlapStart	-350	21	Upstream
MYC2_2469.AT1G35501	chr1	13066941	13067453	513	*	136	5.50281	13.6902	11.7224	MYC2_2469	AT1G35501	13067251	13067335	+	includeFeature	-310	118	Upstream
MYC2_2470.AT1G35510	chr1	13071080	13071372	293	*	185	6.18756	18.5945	16.5039	MYC2_2470	AT1G35510	13071165	13074949	+	overlapStart	-85	85	Upstream
MYC2_2473.AT1G35516	chr1	13078492	13078749	258	*	33	2.49145	3.34896	1.93008	MYC2_2473	AT1G35516	13078618	13079773	+	overlapStart	-126	126	Upstream
MYC2_2478.AT1G35560	chr1	13117452	13118166	715	*	199	6.92946	19.9944	17.8664	MYC2_2478	AT1G35560	13115826	13117235	-	upstream	-217	217	Upstream
MYC2_2480.AT1G35570	chr1	13120680	13121077	398	*	573	11.4677	57.3233	54.7546	MYC2_2480	AT1G35570	13119619	13120439	-	upstream	-241	241	Upstream
MYC2_2485.AT1G35720	chr1	13225033	13225317	285	*	69	3.66736	6.99632	5.30579	MYC2_2485	AT1G35720	13225197	13227195	+	overlapStart	-164	120	Upstream
MYC2_2486.AT1G35750	chr1	13255735	13256006	272	*	76	3.73265	7.64677	5.92014	MYC2_2486	AT1G35750	13253398	13255570	-	upstream	-165	165	Upstream
MYC2_2487.AT1G35780	chr1	13280329	13280633	305	*	120	5.09519	12.0221	10.1079	MYC2_2487	AT1G35780	13277274	13280289	-	upstream	-40	40	Upstream
MYC2_2489.AT1G35830	chr1	13322113	13322460	348	*	60	3.46473	6.08252	4.43613	MYC2_2489	AT1G35830	13321214	13322122	-	overlapStart	9	9	Upstream
MYC2_2492.AT1G35910	chr1	13364899	13365155	257	*	42	2.85331	4.2239	2.70893	MYC2_2492	AT1G35910	13363003	13365060	-	overlapStart	161	95	Upstream
MYC2_2500.AT1G36160	chr1	13533192	13533413	222	*	73	3.73559	7.39979	5.70047	MYC2_2500	AT1G36160	13533411	13544009	+	overlapStart	-219	2	Upstream
MYC2_2502.AT1G36185	chr1	13559285	13559923	639	*	38	2.53713	3.87038	2.39866	MYC2_2502	AT1G36185	13560124	13564586	+	upstream	-839	201	Upstream
MYC2_2503.AT1G36350	chr1	13686375	13686600	226	*	48	3.05712	4.81704	3.25478	MYC2_2503	AT1G36350	13686426	13686498	+	includeFeature	-51	51	Upstream
MYC2_2504.AT1G36370	chr1	13698692	13699056	365	*	74	3.87235	7.44433	5.72108	MYC2_2504	AT1G36370	13696042	13698639	-	upstream	-53	53	Upstream
MYC2_2505.AT1G36370	chr1	13699600	13699918	319	*	26	2.24189	2.62363	1.2736	MYC2_2505	AT1G36370	13696042	13698639	-	upstream	-961	961	Upstream
MYC2_2505.AT1G36380	chr1	13699600	13699918	319	*	26	2.24189	2.62363	1.2736	MYC2_2505	AT1G36380	13700814	13701632	+	upstream	-1214	896	Upstream
MYC2_2506.AT1G36620	chr1	13836260	13836477	218	*	16	1.77103	1.62161	0.470971	MYC2_2506	AT1G36620	13832106	13835564	-	upstream	-696	696	Upstream
MYC2_2507.AT1G36622	chr1	13836888	13837195	308	*	136	5.50281	13.6902	11.7224	MYC2_2507	AT1G36622	13836131	13836954	-	overlapStart	66	66	Upstream
MYC2_2508.AT1G36622	chr1	13837870	13838106	237	*	104	4.68758	10.4212	8.56585	MYC2_2508	AT1G36622	13836131	13836954	-	upstream	-916	916	Upstream
MYC2_2509.AT1G36730	chr1	13900725	13900960	236	*	48	3.05712	4.81704	3.25478	MYC2_2509	AT1G36730	13898210	13900831	-	overlapStart	106	106	Upstream
MYC2_2509.AT1G36732	chr1	13900725	13900960	236	*	48	3.05712	4.81704	3.25478	MYC2_2509	AT1G36732	13898210	13900831	-	overlapStart	106	106	Upstream
MYC2_2512.AT1G36970	chr1	14019063	14019288	226	*	36	2.6495	3.65933	2.19401	MYC2_2512	AT1G36970	14016385	14018356	-	upstream	-707	707	Upstream
MYC2_2512.AT1G36975	chr1	14019063	14019288	226	*	36	2.6495	3.65933	2.19401	MYC2_2512	AT1G36975	14019941	14024331	+	upstream	-878	653	Upstream
MYC2_2513.AT1G36980	chr1	14024999	14025198	200	*	41	2.81659	4.15055	2.66859	MYC2_2513	AT1G36980	14025028	14026941	+	overlapStart	-29	29	Upstream
MYC2_2520.AT1G37130	chr1	14158313	14162207	3895	*	144	5.51756	14.4879	12.5111	MYC2_2520	AT1G37130	14158527	14161938	+	includeFeature	-214	214	Upstream
MYC2_2549.AT1G40103	chr1	15081949	15085083	3135	*	628	4.4096	62.8052	60.1932	MYC2_2549	AT1G40103	15078534	15081356	-	upstream	-593	593	Upstream
MYC2_2549.AT1G40104	chr1	15081949	15085083	3135	*	628	4.4096	62.8052	60.1932	MYC2_2549	AT1G40104	15081952	15085893	+	overlapStart	-3	3	Upstream
MYC2_2556.AT1G41660	chr1	15477535	15477739	205	*	27	2.24044	2.73255	1.37799	MYC2_2556	AT1G41660	15478365	15481172	+	upstream	-830	626	Upstream
MYC2_2560.AT1G41830	chr1	15608781	15609153	373	*	88	4.27996	8.89315	7.10093	MYC2_2560	AT1G41830	15603617	15607966	-	upstream	-815	815	Upstream
MYC2_2568.AT1G42470	chr1	15926011	15926196	186	*	36	2.6495	3.65933	2.19401	MYC2_2568	AT1G42470	15926987	15935208	+	upstream	-976	791	Upstream
MYC2_2569.AT1G42540	chr1	15973016	15973389	374	*	74	3.87235	7.44433	5.72108	MYC2_2569	AT1G42540	15973054	15976703	+	overlapStart	-38	38	Upstream
MYC2_2570.AT1G42550	chr1	15976579	15977098	520	*	50	3.0664	5.02953	3.46215	MYC2_2570	AT1G42550	15977014	15979952	+	overlapStart	-435	84	Upstream
MYC2_2571.AT1G42560	chr1	15983582	15983807	226	*	36	2.6495	3.65933	2.19401	MYC2_2571	AT1G42560	15980135	15983328	-	upstream	-254	254	Upstream
MYC2_2572.AT1G42990	chr1	16137477	16138058	582	*	70	3.59947	7.08777	5.39585	MYC2_2572	AT1G42990	16135852	16137463	-	upstream	-14	14	Upstream
MYC2_2575.AT1G43160	chr1	16263136	16265002	1867	*	1309	24.6607	130.983	127.349	MYC2_2575	AT1G43160	16263813	16264818	+	includeFeature	-677	184	Upstream
MYC2_2578.AT1G43610	chr1	16424310	16424504	195	*	32	2.42813	3.22315	1.80874	MYC2_2578	AT1G43610	16424578	16425345	+	upstream	-268	74	Upstream
MYC2_2582.AT1G43670	chr1	16467928	16468138	211	*	32	2.37362	3.24112	1.82582	MYC2_2582	AT1G43670	16468044	16470500	+	overlapStart	-116	94	Upstream
MYC2_2583.AT1G43710	chr1	16488315	16488618	304	*	36	2.6495	3.65933	2.19401	MYC2_2583	AT1G43710	16486320	16488384	-	overlapStart	69	69	Upstream
MYC2_2584.AT1G43715	chr1	16492230	16492565	336	*	26	2.24189	2.62363	1.2736	MYC2_2584	AT1G43715	16489028	16491339	-	upstream	-891	891	Upstream
MYC2_2585.AT1G43850	chr1	16616993	16617177	185	*	36	2.6495	3.65933	2.19401	MYC2_2585	AT1G43850	16617129	16622049	+	overlapStart	-136	48	Upstream
MYC2_2587.AT1G43910	chr1	16657764	16658141	378	*	60	3.36203	6.08616	4.43897	MYC2_2587	AT1G43910	16655884	16657658	-	upstream	-106	106	Upstream
MYC2_2588.AT1G43920	chr1	16658700	16659113	414	*	42	2.85105	4.2194	2.70893	MYC2_2588	AT1G43920	16659990	16660756	+	upstream	-1290	877	Upstream
MYC2_2589.AT1G44000	chr1	16709579	16709809	231	*	37	2.61491	3.74215	2.27406	MYC2_2589	AT1G44000	16708068	16709713	-	overlapStart	134	96	Upstream
MYC2_2590.AT1G44020	chr1	16718989	16719549	561	*	258	8.15231	25.893	23.6554	MYC2_2590	AT1G44020	16716112	16718656	-	upstream	-333	333	Upstream
MYC2_2591.AT1G44090	chr1	16762430	16762763	334	*	163	6.11423	16.3081	14.2657	MYC2_2591	AT1G44090	16760677	16762486	-	overlapStart	56	56	Upstream
MYC2_2591.AT1G44094	chr1	16762430	16762763	334	*	163	6.11423	16.3081	14.2657	MYC2_2591	AT1G44094	16763285	16763407	+	upstream	-855	522	Upstream
MYC2_2593.AT1G44100	chr1	16766989	16767716	728	*	67	3.66854	6.75201	5.06605	MYC2_2593	AT1G44100	16764405	16767685	-	overlapStart	696	31	Upstream
MYC2_2595.AT1G44125	chr1	16786622	16786806	185	*	19	1.82414	1.91536	0.693772	MYC2_2595	AT1G44125	16780606	16786764	-	overlapStart	142	42	Upstream
MYC2_2597.AT1G44170	chr1	16799981	16800357	377	*	60	3.46473	6.08252	4.43613	MYC2_2597	AT1G44170	16796400	16800321	-	overlapStart	340	36	Upstream
MYC2_2598.AT1G44170	chr1	16800904	16801218	315	*	309	9.09875	30.9268	28.6218	MYC2_2598	AT1G44170	16796400	16800321	-	upstream	-583	583	Upstream
MYC2_2599.AT1G44180	chr1	16810997	16811200	204	*	40	2.75493	4.0267	2.54899	MYC2_2599	AT1G44180	16807953	16810413	-	upstream	-584	584	Upstream
MYC2_2601.AT1G44350	chr1	16836331	16838768	2438	*	1235	23.6417	123.564	120.078	MYC2_2601	AT1G44350	16834210	16838286	-	overlapStart	1955	482	Upstream
MYC2_2602.AT1G44350	chr1	16839097	16839533	437	*	104	4.68758	10.4212	8.56585	MYC2_2602	AT1G44350	16834210	16838286	-	upstream	-811	811	Upstream
MYC2_2604.AT1G44446	chr1	16851153	16851520	368	*	147	5.46451	14.7388	12.7433	MYC2_2604	AT1G44446	16848359	16851224	-	overlapStart	71	71	Upstream
MYC2_2606.AT1G44575	chr1	16871399	16871691	293	*	31	2.44569	3.12521	1.71436	MYC2_2606	AT1G44575	16871696	16873383	+	upstream	-297	5	Upstream
MYC2_2611.AT1G44790	chr1	16913332	16913997	666	*	771	16.916	77.1529	74.4081	MYC2_2611	AT1G44790	16912154	16913664	-	overlapStart	332	332	Upstream
MYC2_2614.AT1G44830	chr1	16933480	16933785	306	*	74	3.87235	7.44433	5.72108	MYC2_2614	AT1G44830	16933792	16934511	+	upstream	-312	7	Upstream
MYC2_2617.AT1G44890	chr1	16963077	16963305	229	*	31	2.44569	3.12521	1.71436	MYC2_2617	AT1G44890	16963144	16964966	+	overlapStart	-67	67	Upstream
MYC2_2618.AT1G44910	chr1	16974488	16974896	409	*	30	2.42399	3.08405	1.71236	MYC2_2618	AT1G44910	16975604	16982965	+	upstream	-1116	708	Upstream
MYC2_2621.AT1G45015	chr1	17021281	17021525	245	*	26	2.24189	2.62363	1.2736	MYC2_2621	AT1G45015	17021610	17022781	+	upstream	-329	85	Upstream
MYC2_2624.AT1G45145	chr1	17076273	17076795	523	*	723	15.1185	72.386	69.6868	MYC2_2624	AT1G45145	17074942	17076330	-	overlapStart	57	57	Upstream
MYC2_2625.AT1G45160	chr1	17090570	17091103	534	*	188	6.65923	18.8953	16.8025	MYC2_2625	AT1G45160	17083546	17090545	-	upstream	-25	25	Upstream
MYC2_2625.AT1G45165	chr1	17090570	17091103	534	*	188	6.65923	18.8953	16.8025	MYC2_2625	AT1G45165	17090807	17091338	+	overlapStart	-237	235	Upstream
MYC2_2626.AT1G45170	chr1	17098032	17098276	245	*	36	2.62853	3.61845	2.18723	MYC2_2626	AT1G45170	17095980	17098006	-	upstream	-26	26	Upstream
MYC2_2626.AT1G45180	chr1	17098032	17098276	245	*	36	2.62853	3.61845	2.18723	MYC2_2626	AT1G45180	17098491	17101896	+	upstream	-459	215	Upstream
MYC2_2627.AT1G45201	chr1	17123543	17123806	264	*	74	3.87235	7.44433	5.72108	MYC2_2627	AT1G45201	17123821	17128651	+	upstream	-278	15	Upstream
MYC2_2634.AT1G45215	chr1	17137132	17137388	257	*	36	2.6495	3.65933	2.19401	MYC2_2634	AT1G45215	17137703	17138231	+	upstream	-571	315	Upstream
MYC2_2635.AT1G45223	chr1	17140661	17140845	185	*	21	2.03808	2.15698	0.872271	MYC2_2635	AT1G45223	17141192	17141771	+	upstream	-531	347	Upstream
MYC2_2637.AT1G45616	chr1	17186537	17186826	290	*	104	4.68758	10.4212	8.56585	MYC2_2637	AT1G45616	17183550	17186534	-	upstream	-3	3	Upstream
MYC2_2638.AT1G45616	chr1	17187236	17187833	598	*	81	4.07615	8.15838	6.39981	MYC2_2638	AT1G45616	17183550	17186534	-	upstream	-702	702	Upstream
MYC2_2639.AT1G45760	chr1	17192844	17193553	710	*	565	13.6551	56.5825	54.0171	MYC2_2639	AT1G45760	17194070	17194801	+	upstream	-1226	517	Upstream
MYC2_2647.AT1G46768	chr1	17266855	17267155	301	*	60	3.46473	6.08252	4.43613	MYC2_2647	AT1G46768	17265701	17266536	-	upstream	-319	319	Upstream
MYC2_2650.AT1G47128	chr1	17285518	17285866	349	*	29	2.36137	2.96484	1.59874	MYC2_2650	AT1G47128	17282825	17285670	-	overlapStart	152	152	Upstream
MYC2_2651.AT1G47128	chr1	17286100	17287028	929	*	88	4.27996	8.89315	7.10093	MYC2_2651	AT1G47128	17282825	17285670	-	upstream	-430	430	Upstream
MYC2_2656.AT1G47240	chr1	17312059	17312398	340	*	120	5.09519	12.0221	10.1079	MYC2_2656	AT1G47240	17308803	17311397	-	upstream	-662	662	Upstream
MYC2_2657.AT1G47278	chr1	17330606	17330829	224	*	31	2.44569	3.12521	1.71436	MYC2_2657	AT1G47278	17330819	17331899	+	overlapStart	-213	10	Upstream
MYC2_2658.AT1G47380	chr1	17376068	17376305	238	*	60	3.36203	6.08616	4.43897	MYC2_2658	AT1G47380	17372537	17376075	-	overlapStart	7	7	Upstream
MYC2_2661.AT1G47400	chr1	17384711	17385157	447	*	60	3.36203	6.08616	4.43897	MYC2_2661	AT1G47400	17385717	17386186	+	upstream	-1006	560	Upstream
MYC2_2662.AT1G47400	chr1	17385386	17385670	285	*	48	3.05712	4.81704	3.25478	MYC2_2662	AT1G47400	17385717	17386186	+	upstream	-331	47	Upstream
MYC2_2664.AT1G47440	chr1	17400714	17400991	278	*	66	3.61405	6.63542	4.97702	MYC2_2664	AT1G47440	17400933	17402268	+	overlapStart	-219	58	Upstream
MYC2_2665.AT1G47490	chr1	17424433	17424781	349	*	85	4.1324	8.56499	6.8003	MYC2_2665	AT1G47490	17424669	17427475	+	overlapStart	-236	112	Upstream
MYC2_2666.AT1G47497	chr1	17432384	17432568	185	*	26	2.24189	2.62363	1.2736	MYC2_2666	AT1G47497	17431009	17432401	-	overlapStart	17	17	Upstream
MYC2_2666.AT1G47500	chr1	17432384	17432568	185	*	26	2.24189	2.62363	1.2736	MYC2_2666	AT1G47500	17432518	17435064	+	overlapStart	-134	50	Upstream
MYC2_2668.AT1G47510	chr1	17438404	17438676	273	*	42	2.85331	4.2239	2.70893	MYC2_2668	AT1G47510	17435565	17438396	-	upstream	-8	8	Upstream
MYC2_2670.AT1G47530	chr1	17451358	17451997	640	*	67	3.66854	6.75201	5.06605	MYC2_2670	AT1G47530	17451680	17454421	+	overlapStart	-322	317	Upstream
MYC2_2673.AT1G47570	chr1	17478335	17478668	334	*	126	5.04099	12.6003	10.6799	MYC2_2673	AT1G47570	17478655	17483502	+	overlapStart	-320	13	Upstream
MYC2_2674.AT1G47578	chr1	17483300	17483882	583	*	119	5.07564	11.9775	10.0819	MYC2_2674	AT1G47578	17484365	17485470	+	upstream	-1065	483	Upstream
MYC2_2679.AT1G47885	chr1	17643802	17644095	294	*	26	2.24189	2.62363	1.2736	MYC2_2679	AT1G47885	17642397	17642805	-	upstream	-997	997	Upstream
MYC2_2679.AT1G47890	chr1	17643802	17644095	294	*	26	2.24189	2.62363	1.2736	MYC2_2679	AT1G47890	17643976	17647035	+	overlapStart	-174	119	Upstream
MYC2_2680.AT1G47900	chr1	17651810	17652001	192	*	36	2.6495	3.65933	2.19401	MYC2_2680	AT1G47900	17647144	17651425	-	upstream	-385	385	Upstream
MYC2_2682.AT1G47970	chr1	17686888	17687215	328	*	140	5.20644	14.0859	12.1142	MYC2_2682	AT1G47970	17687269	17688816	+	upstream	-381	54	Upstream
MYC2_2683.AT1G47990	chr1	17698417	17698698	282	*	88	4.27996	8.89315	7.10093	MYC2_2683	AT1G47990	17698655	17700834	+	overlapStart	-238	43	Upstream
MYC2_2689.AT1G48030	chr1	17719667	17719914	248	*	21	2.03808	2.15698	0.872271	MYC2_2689	AT1G48030	17717133	17719141	-	upstream	-526	526	Upstream
MYC2_2690.AT1G48090	chr1	17758462	17758741	280	*	36	2.6495	3.65933	2.19401	MYC2_2690	AT1G48090	17732010	17758444	-	upstream	-18	18	Upstream
MYC2_2694.AT1G48110	chr1	17773389	17773666	278	*	64	3.25966	6.49885	4.84351	MYC2_2694	AT1G48110	17769938	17773493	-	overlapStart	104	104	Upstream
MYC2_2695.AT1G48230	chr1	17805216	17805741	526	*	25	2.22536	2.59333	1.2736	MYC2_2695	AT1G48230	17805761	17808885	+	upstream	-545	20	Upstream
MYC2_2697.AT1G48280	chr1	17834697	17834956	260	*	42	2.63877	4.25377	2.73819	MYC2_2697	AT1G48280	17835088	17837717	+	upstream	-391	132	Upstream
MYC2_2698.AT1G48320	chr1	17855635	17855908	274	*	71	3.64301	7.18814	5.49365	MYC2_2698	AT1G48320	17854813	17855715	-	overlapStart	80	80	Upstream
MYC2_2700.AT1G48330	chr1	17863387	17863796	410	*	88	4.27996	8.89315	7.10093	MYC2_2700	AT1G48330	17863837	17864386	+	upstream	-450	41	Upstream
MYC2_2702.AT1G48405	chr1	17885800	17886005	206	*	27	2.26158	2.77335	1.4161	MYC2_2702	AT1G48405	17884645	17885614	-	upstream	-186	186	Upstream
MYC2_2703.AT1G48410	chr1	17892556	17892880	325	*	47	3.04848	4.79947	3.25478	MYC2_2703	AT1G48410	17885633	17892596	-	overlapStart	40	40	Upstream
MYC2_2704.AT1G48420	chr1	17898684	17898939	256	*	15	1.67213	1.55969	0.414939	MYC2_2704	AT1G48420	17896597	17898804	-	overlapStart	120	120	Upstream
MYC2_2705.AT1G48430	chr1	17906717	17907345	629	*	603	12.0089	60.3684	57.7721	MYC2_2705	AT1G48430	17902636	17906806	-	overlapStart	89	89	Upstream
MYC2_2705.AT1G48440	chr1	17906717	17907345	629	*	603	12.0089	60.3684	57.7721	MYC2_2705	AT1G48440	17906987	17908534	+	overlapStart	-270	270	Upstream
MYC2_2707.AT1G48450	chr1	17910428	17910675	248	*	63	3.48107	6.34769	4.69545	MYC2_2707	AT1G48450	17908503	17910450	-	overlapStart	22	22	Upstream
MYC2_2707.AT1G48460	chr1	17910428	17910675	248	*	63	3.48107	6.34769	4.69545	MYC2_2707	AT1G48460	17911346	17913300	+	upstream	-918	671	Upstream
MYC2_2709.AT1G48510	chr1	17934576	17934871	296	*	60	3.46473	6.08252	4.43613	MYC2_2709	AT1G48510	17934829	17936915	+	overlapStart	-253	42	Upstream
MYC2_2712.AT1G48530	chr1	17944975	17945421	447	*	153	5.39457	15.3157	13.314	MYC2_2712	AT1G48530	17943242	17944315	-	upstream	-660	660	Upstream
MYC2_2712.AT1G48540	chr1	17944975	17945421	447	*	153	5.39457	15.3157	13.314	MYC2_2712	AT1G48540	17945376	17950521	+	overlapStart	-401	45	Upstream
MYC2_2714.AT1G48620	chr1	17976440	17976775	336	*	67	3.66854	6.75201	5.06605	MYC2_2714	AT1G48620	17973697	17976389	-	upstream	-51	51	Upstream
MYC2_2715.AT1G48742	chr1	18027580	18028411	832	*	1147	22.4189	114.784	111.486	MYC2_2715	AT1G48742	18026838	18027009	-	upstream	-571	571	Upstream
MYC2_2717.AT1G48745	chr1	18029703	18029887	185	*	26	2.24189	2.62363	1.2736	MYC2_2717	AT1G48745	18030704	18031439	+	upstream	-1001	817	Upstream
MYC2_2719.AT1G48760	chr1	18039887	18040093	207	*	17	1.83427	1.72792	0.517312	MYC2_2719	AT1G48760	18035967	18039405	-	upstream	-482	482	Upstream
MYC2_2719.AT1G48770	chr1	18039887	18040093	207	*	17	1.83427	1.72792	0.517312	MYC2_2719	AT1G48770	18040285	18040916	+	upstream	-398	192	Upstream
MYC2_2720.AT1G48790	chr1	18047650	18047929	280	*	36	2.62853	3.61845	2.18723	MYC2_2720	AT1G48790	18043672	18047659	-	overlapStart	9	9	Upstream
MYC2_2724.AT1G48930	chr1	18104710	18105067	358	*	116	4.53789	11.6666	9.77512	MYC2_2724	AT1G48930	18101643	18104661	-	upstream	-49	49	Upstream
MYC2_2726.AT1G48953	chr1	18111469	18111667	199	*	37	2.63602	3.78535	2.31618	MYC2_2726	AT1G48953	18111090	18111380	-	upstream	-89	89	Upstream
MYC2_2726.AT1G48960	chr1	18111469	18111667	199	*	37	2.63602	3.78535	2.31618	MYC2_2726	AT1G48960	18112458	18113733	+	upstream	-989	791	Upstream
MYC2_2728.AT1G49000	chr1	18124866	18125161	296	*	145	5.70662	14.5479	12.5546	MYC2_2728	AT1G49000	18123459	18124165	-	upstream	-701	701	Upstream
MYC2_2730.AT1G49005	chr1	18132326	18132644	319	*	35	2.342	3.5491	2.1219	MYC2_2730	AT1G49005	18128686	18131522	-	upstream	-804	804	Upstream
MYC2_2730.AT1G49010	chr1	18132326	18132644	319	*	35	2.342	3.5491	2.1219	MYC2_2730	AT1G49010	18132645	18133925	+	upstream	-319	1	Upstream
MYC2_2731.AT1G49020	chr1	18135597	18135781	185	*	31	2.3201	3.12817	1.71672	MYC2_2731	AT1G49020	18135598	18135669	-	includeFeature	72	1	Upstream
MYC2_2731.AT1G49030	chr1	18135597	18135781	185	*	31	2.3201	3.12817	1.71672	MYC2_2731	AT1G49030	18136705	18137946	+	upstream	-1108	924	Upstream
MYC2_2732.AT1G49032	chr1	18137649	18138345	697	*	181	6.52185	18.1248	16.038	MYC2_2732	AT1G49032	18138268	18139005	+	overlapStart	-619	77	Upstream
MYC2_2734.AT1G49130	chr1	18175889	18176241	353	*	80	4.04389	8.08781	6.35305	MYC2_2734	AT1G49130	18174740	18176022	-	overlapStart	133	133	Upstream
MYC2_2735.AT1G49130	chr1	18176396	18176600	205	*	48	3.05712	4.81704	3.25478	MYC2_2735	AT1G49130	18174740	18176022	-	upstream	-374	374	Upstream
MYC2_2736.AT1G49160	chr1	18182055	18183084	1030	*	154	5.91042	15.4207	13.4024	MYC2_2736	AT1G49160	18179304	18182391	-	overlapStart	336	336	Upstream
MYC2_2737.AT1G49200	chr1	18197848	18198196	349	*	73	3.8417	7.37803	5.67968	MYC2_2737	AT1G49200	18198227	18199168	+	upstream	-379	31	Upstream
MYC2_2738.AT1G49230	chr1	18208216	18208405	190	*	26	2.24189	2.62363	1.2736	MYC2_2738	AT1G49230	18209261	18210128	+	upstream	-1045	856	Upstream
MYC2_2741.AT1G49240	chr1	18215583	18215970	388	*	60	3.46473	6.08252	4.43613	MYC2_2741	AT1G49240	18215872	18218313	+	overlapStart	-289	98	Upstream
MYC2_2742.AT1G49245	chr1	18218197	18218381	185	*	21	2.03808	2.15698	0.872271	MYC2_2742	AT1G49245	18218750	18219261	+	upstream	-553	369	Upstream
MYC2_2744.AT1G49350	chr1	18264142	18264449	308	*	93	4.36886	9.39035	7.59098	MYC2_2744	AT1G49350	18264971	18267270	+	upstream	-829	522	Upstream
MYC2_2745.AT1G49405	chr1	18284954	18285554	601	*	38	2.60322	3.86838	2.39706	MYC2_2745	AT1G49405	18284335	18284947	-	upstream	-7	7	Upstream
MYC2_2746.AT1G49430	chr1	18290887	18291071	185	*	42	2.85331	4.2239	2.70893	MYC2_2746	AT1G49430	18291043	18295825	+	overlapStart	-156	28	Upstream
MYC2_2749.AT1G49450	chr1	18304889	18305542	654	*	181	6.52185	18.1248	16.038	MYC2_2749	AT1G49450	18305541	18307557	+	overlapStart	-652	1	Upstream
MYC2_2751.AT1G49480	chr1	18316604	18316788	185	*	31	2.44569	3.12521	1.71436	MYC2_2751	AT1G49480	18314178	18316645	-	overlapStart	41	41	Upstream
MYC2_2752.AT1G49500	chr1	18321358	18324441	3084	*	890	18.0151	89.0899	86.2196	MYC2_2752	AT1G49500	18321295	18322284	-	overlapStart	926	63	Upstream
MYC2_2753.AT1G49520	chr1	18328753	18329811	1059	*	492	12.4323	49.2743	46.7677	MYC2_2753	AT1G49520	18329696	18331869	+	overlapStart	-943	115	Upstream
MYC2_2758.AT1G49620	chr1	18366780	18367041	262	*	48	3.05712	4.81704	3.25478	MYC2_2758	AT1G49620	18365491	18366559	-	upstream	-221	221	Upstream
MYC2_2759.AT1G49620	chr1	18367186	18367446	261	*	42	2.85331	4.2239	2.70893	MYC2_2759	AT1G49620	18365491	18366559	-	upstream	-627	627	Upstream
MYC2_2760.AT1G49640	chr1	18376831	18377062	232	*	20	1.99179	2.07528	0.841319	MYC2_2760	AT1G49640	18375538	18376729	-	upstream	-102	102	Upstream
MYC2_2761.AT1G49650	chr1	18378435	18378980	546	*	1008	18.8972	100.839	97.8019	MYC2_2761	AT1G49650	18377252	18378634	-	overlapStart	199	199	Upstream
MYC2_2762.AT1G49660	chr1	18379819	18380361	543	*	299	8.69845	29.9273	27.6367	MYC2_2762	AT1G49660	18378697	18379799	-	upstream	-20	20	Upstream
MYC2_2763.AT1G49720	chr1	18399078	18399397	320	*	81	4.07615	8.15838	6.39981	MYC2_2763	AT1G49720	18400092	18402628	+	upstream	-1014	695	Upstream
MYC2_2764.AT1G49730	chr1	18405550	18405949	400	*	72	3.76748	7.21651	5.52163	MYC2_2764	AT1G49730	18402506	18405681	-	overlapStart	131	131	Upstream
MYC2_2765.AT1G49730	chr1	18406229	18407134	906	*	190	5.89843	19.0571	16.9495	MYC2_2765	AT1G49730	18402506	18405681	-	upstream	-548	548	Upstream
MYC2_2765.AT1G49740	chr1	18406229	18407134	906	*	190	5.89843	19.0571	16.9495	MYC2_2765	AT1G49740	18407518	18410022	+	upstream	-1289	384	Upstream
MYC2_2768.AT1G49780	chr1	18431186	18431413	228	*	54	3.26092	5.43708	3.83145	MYC2_2768	AT1G49780	18428906	18430319	-	upstream	-867	867	Upstream
MYC2_2772.AT1G49890	chr1	18468802	18469134	333	*	54	3.26092	5.43708	3.83145	MYC2_2772	AT1G49890	18470075	18473823	+	upstream	-1273	941	Upstream
MYC2_2773.AT1G49960	chr1	18498396	18498598	203	*	42	2.85331	4.2239	2.70893	MYC2_2773	AT1G49960	18498639	18501886	+	upstream	-243	41	Upstream
MYC2_2774.AT1G50000	chr1	18517418	18517631	214	*	53	3.0518	5.38596	3.80837	MYC2_2774	AT1G50000	18515059	18517249	-	upstream	-169	169	Upstream
MYC2_2774.AT1G50010	chr1	18517418	18517631	214	*	53	3.0518	5.38596	3.80837	MYC2_2774	AT1G50010	18517586	18520000	+	overlapStart	-168	45	Upstream
MYC2_2775.AT1G50020	chr1	18521633	18522100	468	*	29	2.31069	2.98756	1.61997	MYC2_2775	AT1G50020	18519946	18521695	-	overlapStart	62	62	Upstream
MYC2_2776.AT1G50040	chr1	18541902	18542106	205	*	31	2.44569	3.12521	1.71436	MYC2_2776	AT1G50040	18542130	18543948	+	upstream	-228	24	Upstream
MYC2_2778.AT1G50055	chr1	18550031	18550288	258	*	74	3.87235	7.44433	5.72108	MYC2_2778	AT1G50055	18549204	18550042	-	overlapStart	11	11	Upstream
MYC2_2778.AT1G50060	chr1	18550031	18550288	258	*	74	3.87235	7.44433	5.72108	MYC2_2778	AT1G50060	18551186	18552578	+	upstream	-1155	898	Upstream
MYC2_2779.AT1G50090	chr1	18557740	18558016	277	*	96	4.48377	9.64772	7.82338	MYC2_2779	AT1G50090	18554641	18556794	-	upstream	-946	946	Upstream
MYC2_2779.AT1G50100	chr1	18557740	18558016	277	*	96	4.48377	9.64772	7.82338	MYC2_2779	AT1G50100	18557900	18557979	+	includeFeature	-160	37	Upstream
MYC2_2780.AT1G50110	chr1	18560128	18560395	268	*	21	2.03808	2.15698	0.872271	MYC2_2780	AT1G50110	18558017	18560274	-	overlapStart	146	121	Upstream
MYC2_2781.AT1G50170	chr1	18581763	18582069	307	*	45	2.85386	4.57313	3.04815	MYC2_2781	AT1G50170	18582024	18583724	+	overlapStart	-261	45	Upstream
MYC2_2783.AT1G50280	chr1	18626299	18626602	304	*	81	4.07615	8.15838	6.39981	MYC2_2783	AT1G50280	18623698	18626395	-	overlapStart	96	96	Upstream
MYC2_2784.AT1G50280	chr1	18627222	18628544	1323	*	104	4.68758	10.4212	8.56585	MYC2_2784	AT1G50280	18623698	18626395	-	upstream	-827	827	Upstream
MYC2_2784.AT1G50290	chr1	18627222	18628544	1323	*	104	4.68758	10.4212	8.56585	MYC2_2784	AT1G50290	18627559	18628434	-	includeFeature	1212	110	Upstream
MYC2_2786.AT1G50420	chr1	18680047	18680422	376	*	128	5.299	12.8481	10.9066	MYC2_2786	AT1G50420	18677926	18680117	-	overlapStart	70	70	Upstream
MYC2_2787.AT1G50420	chr1	18680588	18681281	694	*	343	9.78277	34.3482	31.9919	MYC2_2787	AT1G50420	18677926	18680117	-	upstream	-471	471	Upstream
MYC2_2789.AT1G50430	chr1	18685609	18685793	185	*	27	2.0366	2.79925	1.44142	MYC2_2789	AT1G50430	18681932	18685652	-	overlapStart	43	43	Upstream
MYC2_2789.AT1G50440	chr1	18685609	18685793	185	*	27	2.0366	2.79925	1.44142	MYC2_2789	AT1G50440	18685777	18687907	+	overlapStart	-168	16	Upstream
MYC2_2790.AT1G50450	chr1	18690574	18692374	1801	*	716	16.0309	71.6962	69.0049	MYC2_2790	AT1G50450	18687785	18690371	-	upstream	-203	203	Upstream
MYC2_2791.AT1G50460	chr1	18693524	18693773	250	*	112	4.89139	11.2129	9.32726	MYC2_2791	AT1G50460	18693684	18697659	+	overlapStart	-160	89	Upstream
MYC2_2794.AT1G50480	chr1	18701673	18701997	325	*	54	3.26092	5.43708	3.83145	MYC2_2794	AT1G50480	18701951	18704938	+	overlapStart	-278	46	Upstream
MYC2_2795.AT1G50570	chr1	18728241	18728470	230	*	45	2.90511	4.50502	2.98254	MYC2_2795	AT1G50570	18726235	18728289	-	overlapStart	48	48	Upstream
MYC2_2797.AT1G50600	chr1	18739379	18739793	415	*	42	2.85331	4.2239	2.70893	MYC2_2797	AT1G50600	18737132	18739547	-	overlapStart	168	168	Upstream
MYC2_2797.AT1G50603	chr1	18739379	18739793	415	*	42	2.85331	4.2239	2.70893	MYC2_2797	AT1G50603	18740560	18740661	+	upstream	-1181	767	Upstream
MYC2_2798.AT1G50600	chr1	18740515	18740961	447	*	59	3.2787	5.90079	4.28425	MYC2_2798	AT1G50600	18737132	18739547	-	upstream	-968	968	Upstream
MYC2_2798.AT1G50603	chr1	18740515	18740961	447	*	59	3.2787	5.90079	4.28425	MYC2_2798	AT1G50603	18740560	18740661	+	includeFeature	-45	45	Upstream
MYC2_2799.AT1G50630	chr1	18754016	18754328	313	*	104	4.68758	10.4212	8.56585	MYC2_2799	AT1G50630	18751456	18753669	-	upstream	-347	347	Upstream
MYC2_2803.AT1G50640	chr1	18758254	18758630	377	*	53	3.23511	5.38355	3.80647	MYC2_2803	AT1G50640	18757148	18758433	-	overlapStart	179	179	Upstream
MYC2_2807.AT1G50660	chr1	18770320	18770608	289	*	21	2.03808	2.15698	0.872271	MYC2_2807	AT1G50660	18770937	18774686	+	upstream	-617	329	Upstream
MYC2_2809.AT1G50830	chr1	18838884	18839194	311	*	51	3.14607	5.1976	3.62665	MYC2_2809	AT1G50830	18835271	18837942	-	upstream	-942	942	Upstream
MYC2_2809.AT1G50840	chr1	18838884	18839194	311	*	51	3.14607	5.1976	3.62665	MYC2_2809	AT1G50840	18839107	18844559	+	overlapStart	-223	87	Upstream
MYC2_2812.AT1G50954	chr1	18886283	18886756	474	*	128	5.299	12.8481	10.9066	MYC2_2812	AT1G50954	18886533	18886628	-	includeFeature	345	128	Upstream
MYC2_2813.AT1G50960	chr1	18888663	18889083	421	*	163	6.11423	16.3081	14.2657	MYC2_2813	AT1G50960	18889549	18891719	+	upstream	-886	466	Upstream
MYC2_2814.AT1G51085	chr1	18932547	18932865	319	*	128	5.299	12.8481	10.9066	MYC2_2814	AT1G51085	18931466	18931691	-	upstream	-856	856	Upstream
MYC2_2814.AT1G51090	chr1	18932547	18932865	319	*	128	5.299	12.8481	10.9066	MYC2_2814	AT1G51090	18932937	18933950	+	upstream	-390	72	Upstream
MYC2_2815.AT1G51130	chr1	18942433	18942879	447	*	145	5.70662	14.5479	12.5546	MYC2_2815	AT1G51130	18939277	18941704	-	upstream	-729	729	Upstream
MYC2_2816.AT1G51140	chr1	18945720	18946309	590	*	96	4.48377	9.64772	7.82338	MYC2_2816	AT1G51140	18943457	18945753	-	overlapStart	33	33	Upstream
MYC2_2822.AT1G51190	chr1	18976787	18977105	319	*	26	2.24189	2.62363	1.2736	MYC2_2822	AT1G51190	18977284	18980618	+	upstream	-497	179	Upstream
MYC2_2824.AT1G51230	chr1	18998126	18998402	277	*	21	2.03808	2.15698	0.872271	MYC2_2824	AT1G51230	18997026	18997434	-	upstream	-692	692	Upstream
MYC2_2825.AT1G51340	chr1	19030968	19031550	583	*	21	2.03808	2.15698	0.872271	MYC2_2825	AT1G51340	19031997	19034979	+	upstream	-1029	447	Upstream
MYC2_2827.AT1G51400	chr1	19052331	19053067	737	*	41	2.5842	4.12609	2.64602	MYC2_2827	AT1G51400	19052023	19052582	-	overlapStart	251	251	Upstream
MYC2_2828.AT1G51400	chr1	19053279	19053993	715	*	514	12.7383	51.4272	48.9072	MYC2_2828	AT1G51400	19052023	19052582	-	upstream	-697	697	Upstream
MYC2_2829.AT1G51420	chr1	19066988	19067204	217	*	42	2.85331	4.2239	2.70893	MYC2_2829	AT1G51420	19064768	19066704	-	upstream	-284	284	Upstream
MYC2_2830.AT1G51440	chr1	19070538	19070817	280	*	48	3.05712	4.81704	3.25478	MYC2_2830	AT1G51440	19070913	19072694	+	upstream	-375	96	Upstream
MYC2_2831.AT1G51500	chr1	19100994	19101914	921	*	54	3.26092	5.43708	3.83145	MYC2_2831	AT1G51500	19097797	19101080	-	overlapStart	86	86	Upstream
MYC2_2832.AT1G51510	chr1	19105403	19106054	652	*	128	5.299	12.8481	10.9066	MYC2_2832	AT1G51510	19102799	19104850	-	upstream	-553	553	Upstream
MYC2_2832.AT1G51520	chr1	19105403	19106054	652	*	128	5.299	12.8481	10.9066	MYC2_2832	AT1G51520	19106687	19109587	+	upstream	-1284	633	Upstream
MYC2_2834.AT1G51620	chr1	19139937	19140185	249	*	30	2.40092	3.04022	1.67035	MYC2_2834	AT1G51620	19140130	19141787	+	overlapStart	-193	55	Upstream
MYC2_2835.AT1G51630	chr1	19144294	19144629	336	*	31	2.44569	3.12521	1.71436	MYC2_2835	AT1G51630	19141973	19144294	-	overlapStart	0	0	Upstream
MYC2_2836.AT1G51660	chr1	19153989	19154341	353	*	73	3.73559	7.39979	5.70047	MYC2_2836	AT1G51660	19154323	19155947	+	overlapStart	-334	18	Upstream
MYC2_2837.AT1G51680	chr1	19162262	19162740	479	*	120	5.09519	12.0221	10.1079	MYC2_2837	AT1G51680	19158752	19161552	-	upstream	-710	710	Upstream
MYC2_2838.AT1G51690	chr1	19163044	19163531	488	*	96	4.48377	9.64772	7.82338	MYC2_2838	AT1G51690	19164063	19170449	+	upstream	-1019	532	Upstream
MYC2_2839.AT1G51690	chr1	19163877	19164061	185	*	29	2.36137	2.96484	1.59874	MYC2_2839	AT1G51690	19164063	19170449	+	upstream	-186	2	Upstream
MYC2_2842.AT1G51700	chr1	19173914	19174171	258	*	31	2.44569	3.12521	1.71436	MYC2_2842	AT1G51700	19174070	19175189	+	overlapStart	-156	101	Upstream
MYC2_2845.AT1G51760	chr1	19198398	19199473	1076	*	1973	32.2908	197.306	192.898	MYC2_2845	AT1G51760	19199419	19201642	+	overlapStart	-1021	54	Upstream
MYC2_2847.AT1G51780	chr1	19203571	19204559	989	*	754	16.2722	75.4878	72.7611	MYC2_2847	AT1G51780	19204512	19206586	+	overlapStart	-941	47	Upstream
MYC2_2849.AT1G51790	chr1	19211367	19211788	422	*	71	3.73884	7.15378	5.4603	MYC2_2849	AT1G51790	19206711	19211417	-	overlapStart	50	50	Upstream
MYC2_2850.AT1G51790	chr1	19212100	19212628	529	*	553	13.4513	55.3478	52.7921	MYC2_2850	AT1G51790	19206711	19211417	-	upstream	-683	683	Upstream
MYC2_2851.AT1G51800	chr1	19212957	19213150	194	*	42	2.85331	4.2239	2.70893	MYC2_2851	AT1G51800	19214148	19217970	+	upstream	-1191	998	Upstream
MYC2_2852.AT1G51800	chr1	19213337	19214230	894	*	154	5.91042	15.4207	13.4024	MYC2_2852	AT1G51800	19214148	19217970	+	overlapStart	-811	82	Upstream
MYC2_2856.AT1G51805	chr1	19225544	19226671	1128	*	354	9.98658	35.4474	33.0777	MYC2_2856	AT1G51805	19220977	19225690	-	overlapStart	146	146	Upstream
MYC2_2858.AT1G51820	chr1	19241828	19242782	955	*	269	8.35612	26.9151	24.6609	MYC2_2858	AT1G51820	19237407	19241883	-	overlapStart	55	55	Upstream
MYC2_2858.AT1G51823	chr1	19241828	19242782	955	*	269	8.35612	26.9151	24.6609	MYC2_2858	AT1G51823	19242294	19242437	+	includeFeature	-466	345	Upstream
MYC2_2859.AT1G51840	chr1	19250781	19251012	232	*	48	3.05712	4.81704	3.25478	MYC2_2859	AT1G51840	19249449	19250709	-	upstream	-72	72	Upstream
[truncated: 11,892 more rows]
