# Supplementary material for: ZAT10 regulates root thermomorphogenesis via very-long-chain fatty acids signaling
Source: Research Square preprint supplement (doi:10.21203/rs.3.rs-7128687/v1), 2025-07-23
Supplement: Supplementary file 6 [file e2e1a4ba6c14a62604a36382.xlsx]

## Sheet: Sheet1
Dataset S5. List of genes overlapping between the MYC2 ChIPseq and the set of genes specifically upregulated at 28˚C in Col-0, based on our RNA-seq data.
AT4G27460
AT5G58680
AT2G07723
AT5G62720
AT4G31290
AT1G64710
AT3G03870
AT3G56400
AT2G15890
AT5G63160
AT5G37540
AT1G12610
AT3G46530
AT4G28750
AT3G56620
AT3G50650
AT1G61340
AT2G41640
AT5G64905
AT1G69890
AT5G43620
AT2G41010
AT4G29780
AT1G51340
AT4G33960
AT3G61190
AT1G25230
AT5G42200
AT1G76650
AT1G73500
AT4G13395
AT1G66500
AT1G66180
AT3G04640
AT1G68050
AT4G12910
AT1G22370
AT2G22500
AT3G55980
AT4G35750
AT5G22020
AT5G07580
AT2G07677
AT2G27830
AT3G54000
AT5G44410
AT2G01300
AT5G03680
AT1G73540
AT3G44260
AT4G27652
AT4G38470
AT3G05160
AT3G49790
AT5G64552
AT4G30270
AT4G36550
AT1G07135
AT4G33985
AT1G19960
AT3G53980
AT4G24570
AT2G16980
AT5G10210
AT4G27280
AT3G19030
AT1G19540
AT1G51440
AT1G74930
AT5G42380
AT5G14545
AT4G20880
AT5G52050
AT5G22250
AT3G56880
AT2G28650
AT5G57510
AT1G11210
AT3G07650
AT3G25620
AT4G27657
AT4G32340
AT1G32928
AT5G15210
AT2G40140
AT5G11420
AT4G25620
AT4G03210
AT4G29720
AT3G46620
AT5G40020
AT2G38790
ATMG00970
AT5G64660
AT1G79760
AT2G35710
AT1G72920
AT4G37800
AT1G79320
AT4G02600
AT2G36220
AT5G44350
AT2G30020
AT1G29920
AT3G62720
AT1G49450
AT1G18100
AT5G37770
AT3G10930
AT3G52480
AT5G47070
AT5G61600
AT2G44840
AT1G27030
AT4G14740
AT4G38530
AT1G31920
AT5G51190
AT4G19160
AT4G27654
AT1G51700
AT3G62290
AT1G67900
AT4G23060
AT2G34510
AT1G19770
AT4G22780
AT1G32920
AT5G44680
ATMG00180
AT3G50060
AT3G03470
AT3G56700
AT4G17490
AT5G59440
AT1G32640
AT4G08160
AT2G15050
AT3G18690
AT5G57560
AT3G25790
AT2G33810
AT2G26530
AT1G27730
AT4G32980
AT4G34410
AT3G02840
AT4G21326
AT5G42440
AT4G36930
AT2G42760
AT3G61970
AT1G58340
AT1G51400
AT4G25490
AT3G61060
AT2G18300
AT1G67910
AT3G29000
AT1G15640
AT1G28370
AT5G17860
AT1G27200
AT5G10180
AT4G11280
AT5G66650
AT3G45160
AT5G40850
AT1G80840
ATMG01090
AT3G19580
AT1G28330
AT1G77760
AT5G47050
AT4G27440
AT5G21960
AT1G62422
AT3G45970
AT2G27690
AT4G18280
AT1G15010
AT1G66970
AT2G18210
AT4G33980
AT1G58420
AT5G59550
AT3G53960
AT1G19210
AT3G11650
AT3G59080
AT2G47010
AT5G64550
AT2G46250
AT1G18740
AT1G60610
AT5G45110
AT2G23430
AT1G70740
AT5G51550
AT1G30270
AT5G03310
AT3G15530
AT1G69870
AT4G25470
AT5G65300
AT1G18300
AT1G61470
AT2G40000
AT5G47230
